# Supplementary material for: Scutellaria barbata D. Don Inhibits the Main Proteases (Mpro and TMPRSS2) of Severe Acute Respiratory Syndrome Coronavirus 2 (SARS-CoV-2) Infection
Source: MDPI journal article supplement (doi:10.3390/v13050826), 2021-05-02
Supplement: s1 [file s1]

Figure S1

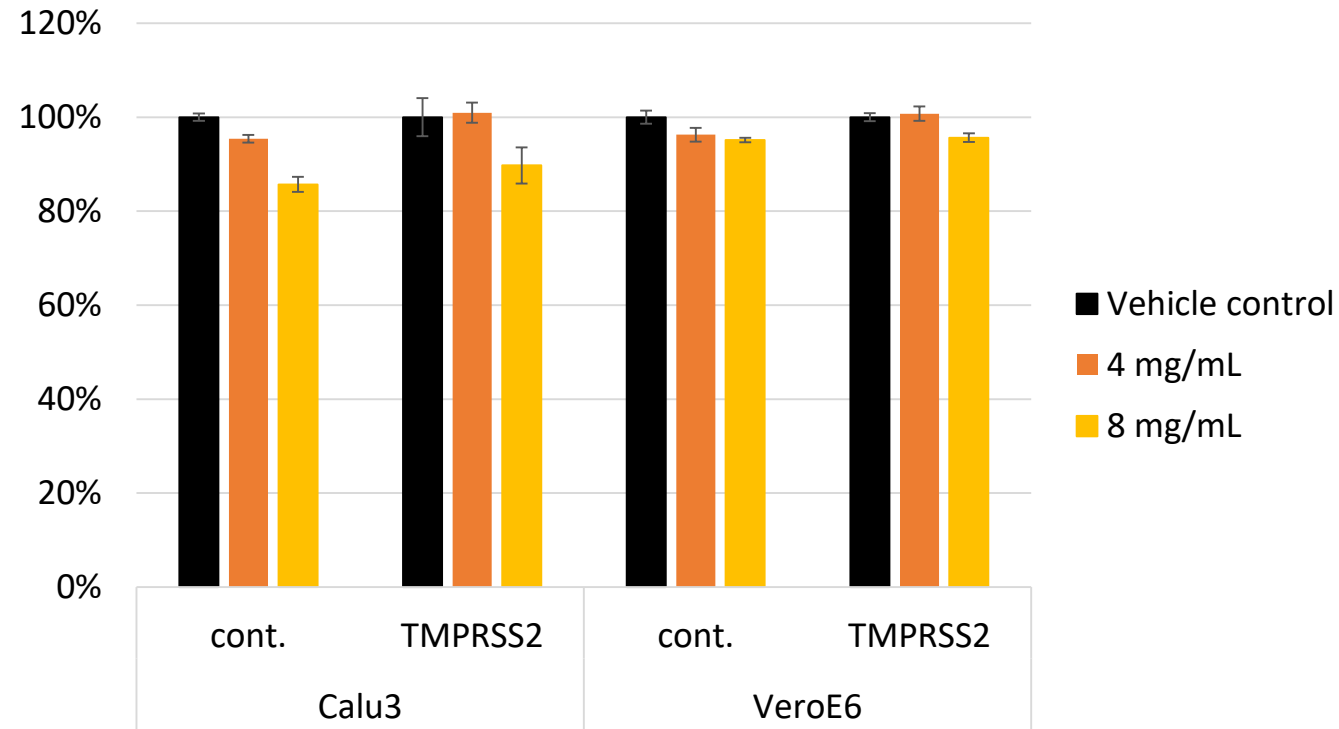

**Supplementary Figure S1.** *Scutellaria barbata* showed no cytotoxicity. Calu3 and VeroE6 cells with and without TMPRSS2 over-expression were treated with *Scutellaria barbata*. After 24 hours treatment, the cell viability measured by CCK8 assay demonstrated no cytotoxicity.
