# Supplementary material for: Scutellaria barbata D. Don Inhibits the Main Proteases (Mpro and TMPRSS2) of Severe Acute Respiratory Syndrome Coronavirus 2 (SARS-CoV-2) Infection
Source: MDPI journal article supplement (doi:10.3390/v13050826), 2021-05-02
Supplement: s1 [file s1]

SPECTRUM - MS *Scutellaria barbata* (SB)

20200817-025.raw

ITMS + p ESI E Full ms [200.00-2000.00]

Scan #: 1-5340

RT: 0.00-30.01

AV: 1148

Data points: 45000

| Mass   | Intensity   | Ratio       | MSX Ratio   | average molecular weight |
|--------|-------------|-------------|-------------|--------------------------|
| 200.04 | 3208.411947 | 7.24094E-05 | 0.014484774 | 547.6803639              |
| 200.08 | 4080.054074 | 9.20811E-05 | 0.018423594 |                          |
| 200.12 | 4282.170501 | 9.66426E-05 | 0.019340122 |                          |
| 200.16 | 3727.838347 | 8.41321E-05 | 0.016839885 |                          |
| 200.2  | 2751.352678 | 6.20942E-05 | 0.012431258 |                          |
| 200.24 | 1749.784465 | 3.94902E-05 | 0.007907517 |                          |
| 200.28 | 987.093369  | 2.22773E-05 | 0.004461702 |                          |
| 200.32 | 509.565744  | 1.15002E-05 | 0.002303718 |                          |
| 200.36 | 262.194464  | 5.91736E-06 | 0.001185603 |                          |
| 200.4  | 166.246546  | 3.75195E-06 | 0.000751891 |                          |
| 200.44 | 151.340754  | 3.41555E-06 | 0.000684613 |                          |
| 200.48 | 181.402474  | 4.094E-06   | 0.000820765 |                          |
| 200.52 | 231.898398  | 5.23362E-06 | 0.001049446 |                          |
| 200.56 | 273.018178  | 6.16164E-06 | 0.001235779 |                          |
| 200.6  | 264.25171   | 5.96379E-06 | 0.001196337 |                          |
| 200.64 | 203.327042  | 4.58881E-06 | 0.000920698 |                          |
| 200.68 | 129.104828  | 2.91372E-06 | 0.000584725 |                          |
| 200.72 | 85.131728   | 1.9213E-06  | 0.000385644 |                          |
| 200.76 | 67.732899   | 1.52864E-06 | 0.000306889 |                          |
| 200.8  | 77.971915   | 1.75972E-06 | 0.000353351 |                          |
| 200.84 | 146.948381  | 3.31642E-06 | 0.00066607  |                          |
| 200.88 | 360.086542  | 8.12665E-06 | 0.001632482 |                          |
| 200.92 | 947.359964  | 2.13806E-05 | 0.004295789 |                          |
| 200.96 | 2118.244966 | 4.78058E-05 | 0.009607061 |                          |
| 201    | 3945.630857 | 8.90474E-05 | 0.017898526 |                          |
| 201.04 | 5875.503846 | 0.000132602 | 0.026658294 |                          |
| 201.08 | 7060.534391 | 0.000159346 | 0.032041379 |                          |
| 201.12 | 7062.086521 | 0.000159381 | 0.032054798 |                          |
| 201.16 | 5942.578048 | 0.000134116 | 0.026978716 |                          |
| 201.2  | 4167.585299 | 9.40566E-05 | 0.018924187 |                          |
| 201.24 | 2452.326433 | 5.53456E-05 | 0.011137747 |                          |
| 201.28 | 1261.408415 | 2.84682E-05 | 0.005730086 |                          |
| 201.32 | 597.58367   | 1.34866E-05 | 0.002715129 |                          |
| 201.36 | 293.846419  | 6.6317E-06  | 0.00133536  |                          |
| 201.4  | 190.917301  | 4.30874E-06 | 0.00086778  |                          |
| 201.44 | 161.675447  | 3.64879E-06 | 0.000735012 |                          |
| 201.48 | 178.494114  | 4.02836E-06 | 0.000811635 |                          |
| 201.52 | 234.147617  | 5.28439E-06 | 0.001064909 |                          |

|        |             |             |             |
|--------|-------------|-------------|-------------|
| 201.56 | 276.698373  | 6.2447E-06  | 0.001258681 |
| 201.6  | 257.15784   | 5.80369E-06 | 0.001170025 |
| 201.64 | 201.603122  | 4.5499E-06  | 0.000917442 |
| 201.68 | 143.454138  | 3.23756E-06 | 0.000652951 |
| 201.72 | 101.833962  | 2.29825E-06 | 0.000463603 |
| 201.76 | 77.479861   | 1.74861E-06 | 0.0003528   |
| 201.8  | 70.642558   | 1.5943E-06  | 0.000321731 |
| 201.84 | 127.758839  | 2.88334E-06 | 0.000581973 |
| 201.88 | 353.17302   | 7.97062E-06 | 0.001609109 |
| 201.92 | 962.79781   | 2.1729E-05  | 0.004387521 |
| 201.96 | 2241.29477  | 5.05829E-05 | 0.010215723 |
| 202    | 4236.448189 | 9.56107E-05 | 0.019313368 |
| 202.04 | 6419.399771 | 0.000144877 | 0.029270931 |
| 202.08 | 7836.854728 | 0.000176867 | 0.035741262 |
| 202.12 | 7901.718788 | 0.000178331 | 0.036044219 |
| 202.16 | 6639.413737 | 0.000149842 | 0.030292123 |
| 202.2  | 4679.063101 | 0.0001056   | 0.021352307 |
| 202.24 | 2823.48185  | 6.37221E-05 | 0.012887148 |
| 202.28 | 1502.608513 | 3.39118E-05 | 0.006859675 |
| 202.32 | 758.590048  | 1.71203E-05 | 0.003463783 |
| 202.36 | 416.14858   | 9.39189E-06 | 0.001900544 |
| 202.4  | 276.537487  | 6.24107E-06 | 0.001263192 |
| 202.44 | 267.091169  | 6.02788E-06 | 0.001220283 |
| 202.48 | 363.793288  | 8.21031E-06 | 0.001662423 |
| 202.52 | 493.548735  | 1.11387E-05 | 0.002255811 |
| 202.56 | 552.261986  | 1.24638E-05 | 0.002524664 |
| 202.6  | 506.495363  | 1.14309E-05 | 0.002315899 |
| 202.64 | 369.523282  | 8.33963E-06 | 0.001689942 |
| 202.68 | 238.481875  | 5.3822E-06  | 0.001090865 |
| 202.72 | 153.341266  | 3.4607E-06  | 0.000701553 |
| 202.76 | 112.881905  | 2.54759E-06 | 0.000516549 |
| 202.8  | 116.736941  | 2.63459E-06 | 0.000534295 |
| 202.84 | 182.712478  | 4.12357E-06 | 0.000836424 |
| 202.88 | 467.950957  | 1.0561E-05  | 0.002142616 |
| 202.92 | 1282.843223 | 2.8952E-05  | 0.005874937 |
| 202.96 | 2853.982934 | 6.44104E-05 | 0.013072739 |
| 203    | 5071.988034 | 0.000114468 | 0.023236944 |
| 203.04 | 7328.928122 | 0.000165404 | 0.033583567 |
| 203.08 | 8721.38252  | 0.000196829 | 0.039972126 |
| 203.12 | 8563.95021  | 0.000193276 | 0.039258308 |
| 203.16 | 7051.629214 | 0.000159145 | 0.032331989 |
| 203.2  | 4893.27504  | 0.000110434 | 0.02244027  |
| 203.24 | 2882.810611 | 6.5061E-05  | 0.013223002 |
| 203.28 | 1496.92626  | 3.37835E-05 | 0.006867518 |
| 203.32 | 728.337269  | 1.64376E-05 | 0.003342084 |
| 203.36 | 378.71192   | 8.547E-06   | 0.001738118 |

|        |             |             |             |
|--------|-------------|-------------|-------------|
| 203.4  | 284.818712  | 6.42796E-06 | 0.001307447 |
| 203.44 | 347.802076  | 7.84941E-06 | 0.001596884 |
| 203.48 | 539.489122  | 1.21755E-05 | 0.002477474 |
| 203.52 | 736.739378  | 1.66272E-05 | 0.003383964 |
| 203.56 | 851.257709  | 1.92117E-05 | 0.003910734 |
| 203.6  | 821.308776  | 1.85358E-05 | 0.003773888 |
| 203.64 | 622.919326  | 1.40584E-05 | 0.002862857 |
| 203.68 | 440.812839  | 9.94853E-06 | 0.002026317 |
| 203.72 | 383.081999  | 8.64563E-06 | 0.001761287 |
| 203.76 | 436.951835  | 9.86139E-06 | 0.002009358 |
| 203.8  | 643.72727   | 1.4528E-05  | 0.002960812 |
| 203.84 | 1140.345659 | 2.5736E-05  | 0.005246029 |
| 203.88 | 2182.212622 | 4.92495E-05 | 0.010040988 |
| 203.92 | 4058.729916 | 9.15999E-05 | 0.018679048 |
| 203.96 | 6768.894882 | 0.000152765 | 0.031157853 |
| 204    | 9808.708136 | 0.000221369 | 0.045159252 |
| 204.04 | 12144.66913 | 0.000274088 | 0.05592497  |
| 204.08 | 12864.95089 | 0.000290344 | 0.059253408 |
| 204.12 | 11566.10428 | 0.000261031 | 0.05328162  |
| 204.16 | 8890.101287 | 0.000200637 | 0.040962091 |
| 204.2  | 5888.929683 | 0.000132905 | 0.027139189 |
| 204.24 | 3460.657153 | 7.81022E-05 | 0.015951596 |
| 204.28 | 1829.12024  | 4.12807E-05 | 0.008432821 |
| 204.32 | 899.67024   | 2.03043E-05 | 0.004148575 |
| 204.36 | 469.704932  | 1.06006E-05 | 0.002166336 |
| 204.4  | 338.78913   | 7.646E-06   | 0.001562842 |
| 204.44 | 409.179756  | 9.23462E-06 | 0.001887925 |
| 204.48 | 646.523374  | 1.45911E-05 | 0.002983595 |
| 204.52 | 1032.526989 | 2.33027E-05 | 0.004765867 |
| 204.56 | 1368.748137 | 3.08907E-05 | 0.00631901  |
| 204.6  | 1352.765782 | 3.053E-05   | 0.006246446 |
| 204.64 | 1010.743039 | 2.28111E-05 | 0.004668056 |
| 204.68 | 601.501774  | 1.35751E-05 | 0.002778543 |
| 204.72 | 316.259377  | 7.13753E-06 | 0.001461196 |
| 204.76 | 186.160148  | 4.20138E-06 | 0.000860274 |
| 204.8  | 178.855862  | 4.03653E-06 | 0.000826681 |
| 204.84 | 364.495726  | 8.22616E-06 | 0.001685047 |
| 204.88 | 1083.582694 | 2.4455E-05  | 0.005010331 |
| 204.92 | 2999.054999 | 6.76845E-05 | 0.013869907 |
| 204.96 | 6923.653836 | 0.000156257 | 0.03202648  |
| 205    | 12995.51701 | 0.000293291 | 0.060124597 |
| 205.04 | 19197.38577 | 0.000433258 | 0.088835273 |
| 205.08 | 22481.64915 | 0.00050738  | 0.104053389 |
| 205.12 | 21207.87383 | 0.000478632 | 0.098177031 |
| 205.16 | 16390.76058 | 0.000369917 | 0.075892097 |
| 205.2  | 10481.60413 | 0.000236555 | 0.048541128 |

|        |             |             |             |
|--------|-------------|-------------|-------------|
| 205.24 | 5643.251354 | 0.00012736  | 0.026139433 |
| 205.28 | 2609.584975 | 5.88947E-05 | 0.012089904 |
| 205.32 | 1102.917263 | 2.48913E-05 | 0.005110683 |
| 205.36 | 499.999617  | 1.12843E-05 | 0.002317343 |
| 205.4  | 316.895333  | 7.15189E-06 | 0.001468997 |
| 205.44 | 318.250415  | 7.18247E-06 | 0.001475566 |
| 205.48 | 487.112483  | 1.09935E-05 | 0.002258934 |
| 205.52 | 820.807395  | 1.85245E-05 | 0.003807151 |
| 205.56 | 1261.665707 | 2.8474E-05  | 0.005853123 |
| 205.6  | 1475.965326 | 3.33105E-05 | 0.006848635 |
| 205.64 | 1243.526118 | 2.80647E-05 | 0.005771215 |
| 205.68 | 784.319215  | 1.7701E-05  | 0.00364074  |
| 205.72 | 407.220803  | 9.19041E-06 | 0.00189065  |
| 205.76 | 210.210519  | 4.74416E-06 | 0.000976158 |
| 205.8  | 155.861006  | 3.51757E-06 | 0.000723915 |
| 205.84 | 221.636366  | 5.00202E-06 | 0.001029617 |
| 205.88 | 556.931367  | 1.25692E-05 | 0.00258774  |
| 205.92 | 1535.928443 | 3.46638E-05 | 0.007137963 |
| 205.96 | 3588.627837 | 8.09903E-05 | 0.016680769 |
| 206    | 6749.298914 | 0.000152322 | 0.031378389 |
| 206.04 | 10175.77026 | 0.000229653 | 0.047317696 |
| 206.08 | 12283.90741 | 0.000277231 | 0.057131699 |
| 206.12 | 11992.2799  | 0.000270649 | 0.055786183 |
| 206.16 | 9627.902057 | 0.000217288 | 0.044796164 |
| 206.2  | 6467.030718 | 0.000145952 | 0.030095277 |
| 206.24 | 3730.02592  | 8.41815E-05 | 0.01736159  |
| 206.28 | 1929.861354 | 4.35543E-05 | 0.008984377 |
| 206.32 | 953.915413  | 2.15285E-05 | 0.004441769 |
| 206.36 | 501.856969  | 1.13262E-05 | 0.002337277 |
| 206.4  | 328.801181  | 7.42058E-06 | 0.001531609 |
| 206.44 | 320.159423  | 7.22555E-06 | 0.001491643 |
| 206.48 | 381.970344  | 8.62054E-06 | 0.001779969 |
| 206.52 | 478.722725  | 1.08041E-05 | 0.002231264 |
| 206.56 | 556.262112  | 1.25541E-05 | 0.002593167 |
| 206.6  | 507.464428  | 1.14528E-05 | 0.002366141 |
| 206.64 | 372.985959  | 8.41777E-06 | 0.001739449 |
| 206.68 | 249.75168   | 5.63655E-06 | 0.001164962 |
| 206.72 | 180.576859  | 4.07537E-06 | 0.00084246  |
| 206.76 | 144.266247  | 3.25589E-06 | 0.000673187 |
| 206.8  | 150.382114  | 3.39391E-06 | 0.000701862 |
| 206.84 | 326.440701  | 7.36731E-06 | 0.001523855 |
| 206.88 | 1004.563007 | 2.26716E-05 | 0.004690298 |
| 206.92 | 2827.128109 | 6.38043E-05 | 0.013202395 |
| 206.96 | 6622.044595 | 0.00014945  | 0.030930239 |
| 207    | 12492.98161 | 0.000281949 | 0.058363483 |
| 207.04 | 18629.59359 | 0.000420444 | 0.087048721 |



|        |             |             |             |
|--------|-------------|-------------|-------------|
| 207.08 | 22404.71358 | 0.000505643 | 0.104708589 |
| 207.12 | 21854.16314 | 0.000493218 | 0.102155317 |
| 207.16 | 17475.40852 | 0.000394396 | 0.081702998 |
| 207.2  | 11688.98051 | 0.000263804 | 0.054660191 |
| 207.24 | 6612.751803 | 0.000149241 | 0.030928621 |
| 207.28 | 3213.728347 | 7.25294E-05 | 0.015033888 |
| 207.32 | 1417.009854 | 3.19799E-05 | 0.006630081 |
| 207.36 | 637.587865  | 1.43895E-05 | 0.002983801 |
| 207.4  | 362.561878  | 8.18252E-06 | 0.001697054 |
| 207.44 | 312.181814  | 7.04551E-06 | 0.00146152  |
| 207.48 | 360.089601  | 8.12672E-06 | 0.001686132 |
| 207.52 | 452.95633   | 1.02226E-05 | 0.002121393 |
| 207.56 | 491.979412  | 1.11033E-05 | 0.002304599 |
| 207.6  | 447.839048  | 1.01071E-05 | 0.002098235 |
| 207.64 | 349.619488  | 7.89042E-06 | 0.001638368 |
| 207.68 | 270.430352  | 6.10324E-06 | 0.00126752  |
| 207.72 | 256.521027  | 5.78932E-06 | 0.001202558 |
| 207.76 | 347.129062  | 7.83422E-06 | 0.001627637 |
| 207.8  | 765.023873  | 1.72655E-05 | 0.003587776 |
| 207.84 | 1905.690452 | 4.30088E-05 | 0.008938945 |
| 207.88 | 4211.239924 | 9.50418E-05 | 0.019757293 |
| 207.92 | 7715.877576 | 0.000174137 | 0.036206484 |
| 207.96 | 11714.29846 | 0.000264375 | 0.054979508 |
| 208    | 15026.27615 | 0.000339122 | 0.070537402 |
| 208.04 | 16988.99308 | 0.000383418 | 0.079766262 |
| 208.08 | 17017.2526  | 0.000384056 | 0.079914308 |
| 208.12 | 14984.21495 | 0.000338173 | 0.070380536 |
| 208.16 | 11439.35093 | 0.00025817  | 0.053740712 |
| 208.2  | 7555.089535 | 0.000170508 | 0.035499734 |
| 208.24 | 4344.742088 | 9.80548E-05 | 0.020418927 |
| 208.28 | 2251.485108 | 5.08129E-05 | 0.010583307 |
| 208.32 | 1137.660676 | 2.56754E-05 | 0.005348703 |
| 208.36 | 626.6521    | 1.41427E-05 | 0.002946766 |
| 208.4  | 442.524702  | 9.98717E-06 | 0.002081325 |
| 208.44 | 417.844168  | 9.43016E-06 | 0.001965623 |
| 208.48 | 456.642651  | 1.03058E-05 | 0.002148551 |
| 208.52 | 512.883316  | 1.15751E-05 | 0.002413632 |
| 208.56 | 575.261846  | 1.29829E-05 | 0.002707705 |
| 208.6  | 555.260538  | 1.25315E-05 | 0.002614062 |
| 208.64 | 424.255148  | 9.57485E-06 | 0.001997696 |
| 208.68 | 289.561701  | 6.535E-06   | 0.001363725 |
| 208.72 | 210.833483  | 4.75822E-06 | 0.000993135 |
| 208.76 | 192.58551   | 4.34639E-06 | 0.000907352 |
| 208.8  | 264.200895  | 5.96265E-06 | 0.001245001 |
| 208.84 | 572.828081  | 1.29279E-05 | 0.002699869 |
| 208.88 | 1521.454103 | 3.43371E-05 | 0.007172333 |

|        |             |             |             |
|--------|-------------|-------------|-------------|
| 208.92 | 3829.48736  | 8.64262E-05 | 0.018056161 |
| 208.96 | 8232.447951 | 0.000185795 | 0.038823699 |
| 209    | 14836.89756 | 0.000334848 | 0.069983255 |
| 209.04 | 22068.98293 | 0.000498066 | 0.10411576  |
| 209.08 | 27004.18269 | 0.000609447 | 0.127423135 |
| 209.12 | 27447.71327 | 0.000619457 | 0.129540776 |
| 209.16 | 23225.10774 | 0.000524158 | 0.109632957 |
| 209.2  | 16439.25994 | 0.000371011 | 0.077615543 |
| 209.24 | 9796.868595 | 0.000221102 | 0.046263315 |
| 209.28 | 4879.771834 | 0.00011013  | 0.023047934 |
| 209.32 | 2101.42632  | 4.74263E-05 | 0.009927266 |
| 209.36 | 882.037702  | 1.99064E-05 | 0.004167596 |
| 209.4  | 480.507376  | 1.08444E-05 | 0.002270814 |
| 209.44 | 417.110703  | 9.41361E-06 | 0.001971586 |
| 209.48 | 469.015614  | 1.0585E-05  | 0.002217352 |
| 209.52 | 548.066432  | 1.23691E-05 | 0.002591573 |
| 209.56 | 601.938711  | 1.35849E-05 | 0.002846855 |
| 209.6  | 564.95874   | 1.27503E-05 | 0.00267247  |
| 209.64 | 446.18864   | 1.00699E-05 | 0.002111045 |
| 209.68 | 311.046013  | 7.01988E-06 | 0.001471927 |
| 209.72 | 215.457266  | 4.86257E-06 | 0.001019778 |
| 209.76 | 187.655807  | 4.23513E-06 | 0.000888361 |
| 209.8  | 269.720149  | 6.08721E-06 | 0.001277096 |
| 209.84 | 543.469894  | 1.22654E-05 | 0.002573763 |
| 209.88 | 1192.666204 | 2.69168E-05 | 0.005649301 |
| 209.92 | 2532.642035 | 5.71582E-05 | 0.01199865  |
| 209.96 | 4900.17277  | 0.00011059  | 0.023219492 |
| 210    | 8258.595104 | 0.000186385 | 0.039140848 |
| 210.04 | 11818.23824 | 0.000266721 | 0.056022116 |
| 210.08 | 14245.52799 | 0.000321502 | 0.067541082 |
| 210.12 | 14140.18309 | 0.000319124 | 0.067054385 |
| 210.16 | 11553.71036 | 0.000260751 | 0.054799462 |
| 210.2  | 7914.353982 | 0.000178616 | 0.037545072 |
| 210.24 | 4624.492613 | 0.000104368 | 0.021942403 |
| 210.28 | 2395.833694 | 5.40706E-05 | 0.011369972 |
| 210.32 | 1192.063095 | 2.69032E-05 | 0.005658282 |
| 210.36 | 641.245405  | 1.4472E-05  | 0.003044333 |
| 210.4  | 463.871593  | 1.04689E-05 | 0.002202664 |
| 210.44 | 471.360018  | 1.06379E-05 | 0.002238648 |
| 210.48 | 572.721621  | 1.29255E-05 | 0.002720565 |
| 210.52 | 679.309306  | 1.53311E-05 | 0.003227496 |
| 210.56 | 704.069835  | 1.58899E-05 | 0.003345772 |
| 210.6  | 590.806514  | 1.33337E-05 | 0.002808073 |
| 210.64 | 420.271243  | 9.48494E-06 | 0.001997907 |
| 210.68 | 282.940831  | 6.38558E-06 | 0.001345314 |
| 210.72 | 195.313624  | 4.40796E-06 | 0.000928845 |

|        |             |             |             |
|--------|-------------|-------------|-------------|
| 210.76 | 157.638862  | 3.55769E-06 | 0.000749819 |
| 210.8  | 163.118741  | 3.68136E-06 | 0.000776031 |
| 210.84 | 288.621195  | 6.51378E-06 | 0.001373365 |
| 210.88 | 775.471163  | 1.75013E-05 | 0.003690675 |
| 210.92 | 2145.966768 | 4.84315E-05 | 0.010215168 |
| 210.96 | 5226.435659 | 0.000117953 | 0.024883444 |
| 211    | 10204.35468 | 0.000230298 | 0.048592893 |
| 211.04 | 15971.3478  | 0.000360451 | 0.076069595 |
| 211.08 | 20043.78392 | 0.00045236  | 0.095484209 |
| 211.12 | 20319.16032 | 0.000458575 | 0.096814385 |
| 211.16 | 16882.92304 | 0.000381024 | 0.08045704  |
| 211.2  | 11684.46447 | 0.000263702 | 0.055693881 |
| 211.24 | 6860.537134 | 0.000154833 | 0.032706874 |
| 211.28 | 3480.612242 | 7.85526E-05 | 0.016596587 |
| 211.32 | 1588.753666 | 3.5856E-05  | 0.007577081 |
| 211.36 | 752.687794  | 1.69871E-05 | 0.003590397 |
| 211.4  | 543.567737  | 1.22676E-05 | 0.002593364 |
| 211.44 | 720.357082  | 1.62575E-05 | 0.003437476 |
| 211.48 | 1176.834512 | 2.65595E-05 | 0.005616806 |
| 211.52 | 1606.924608 | 3.62661E-05 | 0.007670995 |
| 211.56 | 1646.026031 | 3.71485E-05 | 0.00785914  |
| 211.6  | 1276.823328 | 2.88161E-05 | 0.006097492 |
| 211.64 | 798.008949  | 1.801E-05   | 0.003811626 |
| 211.68 | 436.3023    | 9.84674E-06 | 0.002084357 |
| 211.72 | 242.711005  | 5.47765E-06 | 0.001159728 |
| 211.76 | 174.997725  | 3.94945E-06 | 0.000836337 |
| 211.8  | 183.190075  | 4.13434E-06 | 0.000875654 |
| 211.84 | 298.787093  | 6.74321E-06 | 0.001428481 |
| 211.88 | 693.115467  | 1.56427E-05 | 0.003314365 |
| 211.92 | 1787.918541 | 4.03508E-05 | 0.008551148 |
| 211.96 | 3987.26226  | 8.9987E-05  | 0.019073635 |
| 212    | 7381.897441 | 0.000166599 | 0.035319018 |
| 212.04 | 11036.87968 | 0.000249087 | 0.052816408 |
| 212.08 | 13286.22861 | 0.000299852 | 0.063592543 |
| 212.12 | 13008.73747 | 0.000293589 | 0.062276117 |
| 212.16 | 10635.1876  | 0.000240021 | 0.050922934 |
| 212.2  | 7289.354856 | 0.000164511 | 0.034909146 |
| 212.24 | 4296.367404 | 9.6963E-05  | 0.020579433 |
| 212.28 | 2280.061973 | 5.14578E-05 | 0.010923467 |
| 212.32 | 1149.230434 | 2.59365E-05 | 0.005506844 |
| 212.36 | 619.331638  | 1.39775E-05 | 0.002968252 |
| 212.4  | 453.66404   | 1.02386E-05 | 0.002174671 |
| 212.44 | 479.570214  | 1.08232E-05 | 0.002299287 |
| 212.48 | 655.153908  | 1.47859E-05 | 0.00314171  |
| 212.52 | 863.575926  | 1.94897E-05 | 0.004141952 |
| 212.56 | 908.243949  | 2.04978E-05 | 0.004357013 |

|        |             |             |             |
|--------|-------------|-------------|-------------|
| 212.6  | 733.287874  | 1.65493E-05 | 0.003518378 |
| 212.64 | 510.03745   | 1.15108E-05 | 0.002447664 |
| 212.68 | 336.841989  | 7.60205E-06 | 0.001616805 |
| 212.72 | 223.859237  | 5.05219E-06 | 0.001074702 |
| 212.76 | 174.198745  | 3.93142E-06 | 0.00083645  |
| 212.8  | 183.654286  | 4.14482E-06 | 0.000882018 |
| 212.84 | 336.385983  | 7.59176E-06 | 0.001615831 |
| 212.88 | 898.851127  | 2.02858E-05 | 0.004318445 |
| 212.92 | 2405.014175 | 5.42778E-05 | 0.011556833 |
| 212.96 | 5491.911407 | 0.000123945 | 0.026395283 |
| 213    | 10239.14688 | 0.000231083 | 0.049220739 |
| 213.04 | 15315.91084 | 0.000345659 | 0.073639145 |
| 213.08 | 18314.59945 | 0.000413335 | 0.088073422 |
| 213.12 | 17961.12464 | 0.000405358 | 0.086389804 |
| 213.16 | 14744.00524 | 0.000332752 | 0.070929344 |
| 213.2  | 10141.79779 | 0.000228886 | 0.048798548 |
| 213.24 | 5955.564383 | 0.000134409 | 0.028661331 |
| 213.28 | 3067.727034 | 6.92343E-05 | 0.014766297 |
| 213.32 | 1426.152002 | 3.21863E-05 | 0.006865974 |
| 213.36 | 665.217466  | 1.5013E-05  | 0.00320318  |
| 213.4  | 403.697178  | 9.11088E-06 | 0.001944262 |
| 213.44 | 377.007466  | 8.50853E-06 | 0.001816061 |
| 213.48 | 480.004964  | 1.0833E-05  | 0.002312638 |
| 213.52 | 609.272769  | 1.37504E-05 | 0.002935993 |
| 213.56 | 638.076267  | 1.44005E-05 | 0.003075369 |
| 213.6  | 567.325615  | 1.28037E-05 | 0.002734881 |
| 213.64 | 433.345961  | 9.78001E-06 | 0.002089402 |
| 213.68 | 291.516797  | 6.57913E-06 | 0.001405828 |
| 213.72 | 189.841244  | 4.28445E-06 | 0.000915673 |
| 213.76 | 143.418438  | 3.23675E-06 | 0.000691889 |
| 213.8  | 157.909608  | 3.5638E-06  | 0.00076194  |
| 213.84 | 255.762528  | 5.7722E-06  | 0.001234328 |
| 213.88 | 575.903073  | 1.29973E-05 | 0.002779869 |
| 213.92 | 1407.848104 | 3.17732E-05 | 0.006796917 |
| 213.96 | 3082.298447 | 6.95632E-05 | 0.014883739 |
| 214    | 5654.620141 | 0.000127617 | 0.027310017 |
| 214.04 | 8527.161568 | 0.000192446 | 0.041191176 |
| 214.08 | 10470.97687 | 0.000236315 | 0.050590393 |
| 214.12 | 10460.35105 | 0.000236076 | 0.050548497 |
| 214.16 | 8651.549707 | 0.000195253 | 0.041815474 |
| 214.2  | 6058.483132 | 0.000136732 | 0.029287893 |
| 214.24 | 3683.627531 | 8.31343E-05 | 0.017810702 |
| 214.28 | 2017.875814 | 4.55406E-05 | 0.00975845  |
| 214.32 | 1043.901779 | 2.35594E-05 | 0.005049253 |
| 214.36 | 578.074108  | 1.30463E-05 | 0.002796611 |
| 214.4  | 395.417619  | 8.92402E-06 | 0.001913311 |

|        |             |             |             |
|--------|-------------|-------------|-------------|
| 214.44 | 365.963865  | 8.25929E-06 | 0.001771123 |
| 214.48 | 432.181188  | 9.75373E-06 | 0.002091979 |
| 214.52 | 519.767884  | 1.17304E-05 | 0.002516413 |
| 214.56 | 552.559608  | 1.24705E-05 | 0.002675671 |
| 214.6  | 494.135773  | 1.1152E-05  | 0.00239321  |
| 214.64 | 373.68025   | 8.43344E-06 | 0.001810154 |
| 214.68 | 253.469911  | 5.72046E-06 | 0.001228069 |
| 214.72 | 178.819084  | 4.0357E-06  | 0.000866545 |
| 214.76 | 169.155246  | 3.8176E-06  | 0.000819867 |
| 214.8  | 230.763806  | 5.20802E-06 | 0.001118682 |
| 214.84 | 470.021554  | 1.06077E-05 | 0.002278965 |
| 214.88 | 1190.141113 | 2.68598E-05 | 0.00577164  |
| 214.92 | 3011.038547 | 6.79549E-05 | 0.014604877 |
| 214.96 | 6920.695191 | 0.00015619  | 0.033574699 |
| 215    | 12937.33459 | 0.000291978 | 0.062775189 |
| 215.04 | 19322.68856 | 0.000436086 | 0.093775969 |
| 215.08 | 23022.39247 | 0.000519583 | 0.111751983 |
| 215.12 | 22106.37241 | 0.00049891  | 0.107325526 |
| 215.16 | 17389.72949 | 0.000392462 | 0.084442118 |
| 215.2  | 11453.4013  | 0.000258487 | 0.05562647  |
| 215.24 | 6445.259602 | 0.000145461 | 0.031308925 |
| 215.28 | 3164.342403 | 7.14148E-05 | 0.015374178 |
| 215.32 | 1422.994382 | 3.2115E-05  | 0.006915002 |
| 215.36 | 663.046886  | 1.4964E-05  | 0.003222657 |
| 215.4  | 407.854864  | 9.20472E-06 | 0.001982696 |
| 215.44 | 371.60866   | 8.38669E-06 | 0.001806828 |
| 215.48 | 465.928602  | 1.05154E-05 | 0.00226585  |
| 215.52 | 572.071693  | 1.29109E-05 | 0.002782549 |
| 215.56 | 616.353998  | 1.39103E-05 | 0.002998494 |
| 215.6  | 566.915121  | 1.27945E-05 | 0.002758491 |
| 215.64 | 423.8977    | 9.56678E-06 | 0.002062981 |
| 215.68 | 293.284633  | 6.61903E-06 | 0.001427591 |
| 215.72 | 201.999772  | 4.55885E-06 | 0.000983436 |
| 215.76 | 161.046456  | 3.63459E-06 | 0.0007842   |
| 215.8  | 177.941292  | 4.01589E-06 | 0.000866628 |
| 215.84 | 268.927248  | 6.06931E-06 | 0.001310001 |
| 215.88 | 593.886566  | 1.34032E-05 | 0.002893481 |
| 215.92 | 1419.308722 | 3.20318E-05 | 0.006916311 |
| 215.96 | 3129.214198 | 7.0622E-05  | 0.015251528 |
| 216    | 5946.832286 | 0.000134212 | 0.028989732 |
| 216.04 | 9209.212984 | 0.000207839 | 0.044901561 |
| 216.08 | 11502.8309  | 0.000259603 | 0.056094988 |
| 216.12 | 11636.22079 | 0.000262613 | 0.056755985 |
| 216.16 | 9679.212997 | 0.000218446 | 0.047219364 |
| 216.2  | 6696.497143 | 0.000151131 | 0.032674439 |
| 216.24 | 3944.097488 | 8.90128E-05 | 0.019248125 |

|        |             |             |             |
|--------|-------------|-------------|-------------|
| 216.28 | 2071.94671  | 4.6761E-05  | 0.010113459 |
| 216.32 | 1045.786617 | 2.36019E-05 | 0.005105573 |
| 216.36 | 570.640695  | 1.28786E-05 | 0.002786406 |
| 216.4  | 403.386185  | 9.10386E-06 | 0.001970076 |
| 216.44 | 408.454341  | 9.21825E-06 | 0.001995197 |
| 216.48 | 488.734955  | 1.10301E-05 | 0.002387789 |
| 216.52 | 599.405408  | 1.35277E-05 | 0.002929027 |
| 216.56 | 680.70037   | 1.53625E-05 | 0.003326894 |
| 216.6  | 627.889464  | 1.41706E-05 | 0.00306935  |
| 216.64 | 458.513416  | 1.0348E-05  | 0.002241793 |
| 216.68 | 300.786091  | 6.78832E-06 | 0.001470894 |
| 216.72 | 217.711019  | 4.91343E-06 | 0.00106484  |
| 216.76 | 232.57903   | 5.24898E-06 | 0.00113777  |
| 216.8  | 369.286819  | 8.33429E-06 | 0.001806874 |
| 216.84 | 778.369667  | 1.75667E-05 | 0.003809167 |
| 216.88 | 1839.086724 | 4.15056E-05 | 0.00900174  |
| 216.92 | 3997.874886 | 9.02265E-05 | 0.019571925 |
| 216.96 | 7425.653525 | 0.000167587 | 0.036359601 |
| 217    | 11698.9569  | 0.000264029 | 0.057294328 |
| 217.04 | 15747.50134 | 0.000355399 | 0.077135836 |
| 217.08 | 17875.21938 | 0.000403419 | 0.087574154 |
| 217.12 | 16960.24114 | 0.000382769 | 0.083106809 |
| 217.16 | 13531.42659 | 0.000305385 | 0.066317504 |
| 217.2  | 9099.083925 | 0.000205354 | 0.044602813 |
| 217.24 | 5191.451715 | 0.000117164 | 0.025452671 |
| 217.28 | 2578.113922 | 5.81844E-05 | 0.012642315 |
| 217.32 | 1187.362967 | 2.67971E-05 | 0.005823552 |
| 217.36 | 588.161958  | 1.3274E-05  | 0.002885236 |
| 217.4  | 389.242086  | 8.78465E-06 | 0.001909783 |
| 217.44 | 374.904392  | 8.46107E-06 | 0.001839775 |
| 217.48 | 448.562346  | 1.01234E-05 | 0.002201643 |
| 217.52 | 577.92703   | 1.3043E-05  | 0.002837115 |
| 217.56 | 695.401785  | 1.56942E-05 | 0.003414441 |
| 217.6  | 694.722793  | 1.56789E-05 | 0.003411734 |
| 217.64 | 575.990086  | 1.29993E-05 | 0.002829166 |
| 217.68 | 389.250909  | 8.78485E-06 | 0.001912286 |
| 217.72 | 248.064414  | 5.59847E-06 | 0.001218899 |
| 217.76 | 180.326878  | 4.06973E-06 | 0.000886224 |
| 217.8  | 181.381939  | 4.09354E-06 | 0.000891573 |
| 217.84 | 276.107751  | 6.23137E-06 | 0.001357441 |
| 217.88 | 606.679013  | 1.36919E-05 | 0.002983191 |
| 217.92 | 1457.004537 | 3.28826E-05 | 0.007165768 |
| 217.96 | 3165.208485 | 7.14343E-05 | 0.01556983  |
| 218    | 5768.65369  | 0.00013019  | 0.028381524 |
| 218.04 | 8661.359957 | 0.000195475 | 0.042621332 |
| 218.08 | 10682.00572 | 0.000241078 | 0.052574288 |

|        |             |             |             |
|--------|-------------|-------------|-------------|
| 218.12 | 10835.205   | 0.000244535 | 0.05333808  |
| 218.16 | 8998.221522 | 0.000203077 | 0.044303349 |
| 218.2  | 6211.895035 | 0.000140194 | 0.030590291 |
| 218.24 | 3699.421845 | 8.34908E-05 | 0.018221032 |
| 218.28 | 1977.325729 | 4.46255E-05 | 0.009740851 |
| 218.32 | 1021.485329 | 2.30535E-05 | 0.00503304  |
| 218.36 | 606.2291    | 1.36817E-05 | 0.002987546 |
| 218.4  | 475.119449  | 1.07228E-05 | 0.002341856 |
| 218.44 | 488.574753  | 1.10265E-05 | 0.002408618 |
| 218.48 | 619.953379  | 1.39915E-05 | 0.003056859 |
| 218.52 | 768.917268  | 1.73534E-05 | 0.003792063 |
| 218.56 | 877.38612   | 1.98014E-05 | 0.00432779  |
| 218.6  | 815.051577  | 1.83946E-05 | 0.004021055 |
| 218.64 | 630.413694  | 1.42276E-05 | 0.003110713 |
| 218.68 | 426.783812  | 9.63192E-06 | 0.002106307 |
| 218.72 | 277.185845  | 6.2557E-06  | 0.001368246 |
| 218.76 | 233.300975  | 5.26528E-06 | 0.001151832 |
| 218.8  | 343.242371  | 7.7465E-06  | 0.001694935 |
| 218.84 | 717.524095  | 1.61935E-05 | 0.00354379  |
| 218.88 | 1711.578051 | 3.86279E-05 | 0.008454882 |
| 218.92 | 3851.292105 | 8.69183E-05 | 0.019028154 |
| 218.96 | 7495.325811 | 0.000169159 | 0.037039069 |
| 219    | 12494.53936 | 0.000281984 | 0.061754573 |
| 219.04 | 17497.55302 | 0.000394895 | 0.086497888 |
| 219.08 | 20355.245   | 0.00045939  | 0.100643058 |
| 219.12 | 19574.00038 | 0.000441758 | 0.096797996 |
| 219.16 | 15585.60972 | 0.000351746 | 0.077088544 |
| 219.2  | 10304.47592 | 0.000232558 | 0.050976641 |
| 219.24 | 5719.242773 | 0.000129075 | 0.028298478 |
| 219.28 | 2758.653931 | 6.2259E-05  | 0.013652148 |
| 219.32 | 1238.203656 | 2.79445E-05 | 0.006128795 |
| 219.36 | 597.046723  | 1.34745E-05 | 0.002955769 |
| 219.4  | 401.144667  | 9.05328E-06 | 0.001986289 |
| 219.44 | 395.208599  | 8.91931E-06 | 0.001957253 |
| 219.48 | 465.275383  | 1.05006E-05 | 0.002304675 |
| 219.52 | 557.9368    | 1.25919E-05 | 0.002764164 |
| 219.56 | 625.601007  | 1.41189E-05 | 0.003099955 |
| 219.6  | 585.449512  | 1.32128E-05 | 0.002901526 |
| 219.64 | 464.294493  | 1.04785E-05 | 0.002301493 |
| 219.68 | 319.032291  | 7.20011E-06 | 0.001581721 |
| 219.72 | 220.064158  | 4.96654E-06 | 0.001091249 |
| 219.76 | 192.004735  | 4.33328E-06 | 0.000952281 |
| 219.8  | 246.620804  | 5.56589E-06 | 0.001223382 |
| 219.84 | 440.097812  | 9.93239E-06 | 0.002183538 |
| 219.88 | 913.544951  | 2.06174E-05 | 0.004533362 |
| 219.92 | 1987.019294 | 4.48443E-05 | 0.009862149 |

|        |             |             |             |
|--------|-------------|-------------|-------------|
| 219.96 | 3952.557037 | 8.92037E-05 | 0.019621247 |
| 220    | 6870.777992 | 0.000155064 | 0.034114056 |
| 220.04 | 10243.18855 | 0.000231174 | 0.050867637 |
| 220.08 | 12624.87006 | 0.000284926 | 0.062706455 |
| 220.12 | 12744.83401 | 0.000287633 | 0.063313809 |
| 220.16 | 10664.22668 | 0.000240677 | 0.052987392 |
| 220.2  | 7494.753159 | 0.000169146 | 0.03724598  |
| 220.24 | 4535.337623 | 0.000102356 | 0.022542941 |
| 220.28 | 2455.023973 | 5.54065E-05 | 0.012204938 |
| 220.32 | 1236.568727 | 2.79076E-05 | 0.00614861  |
| 220.36 | 661.347167  | 1.49257E-05 | 0.003289024 |
| 220.4  | 447.938273  | 1.01093E-05 | 0.002228099 |
| 220.44 | 468.362023  | 1.05703E-05 | 0.002330112 |
| 220.48 | 599.750497  | 1.35355E-05 | 0.002984314 |
| 220.52 | 748.478998  | 1.68921E-05 | 0.003725052 |
| 220.56 | 796.859631  | 1.7984E-05  | 0.003966554 |
| 220.6  | 715.568102  | 1.61494E-05 | 0.003562552 |
| 220.64 | 551.058197  | 1.24366E-05 | 0.002744015 |
| 220.68 | 392.223981  | 8.85195E-06 | 0.001953448 |
| 220.72 | 308.740334  | 6.96784E-06 | 0.001537941 |
| 220.76 | 314.136351  | 7.08962E-06 | 0.001565104 |
| 220.8  | 409.03363   | 9.23132E-06 | 0.002038275 |
| 220.84 | 716.158793  | 1.61627E-05 | 0.003569372 |
| 220.88 | 1580.475025 | 3.56691E-05 | 0.007878595 |
| 220.92 | 3501.566124 | 7.90255E-05 | 0.017458307 |
| 220.96 | 6965.780698 | 0.000157208 | 0.034736673 |
| 221    | 11803.45718 | 0.000266388 | 0.058871657 |
| 221.04 | 16571.19415 | 0.000373989 | 0.082666478 |
| 221.08 | 19201.01408 | 0.00043334  | 0.095802839 |
| 221.12 | 18332.09431 | 0.00041373  | 0.091483941 |
| 221.16 | 14637.46379 | 0.000330347 | 0.07305958  |
| 221.2  | 9830.292261 | 0.000221856 | 0.049074548 |
| 221.24 | 5589.670813 | 0.000126151 | 0.027909666 |
| 221.28 | 2771.175668 | 6.25416E-05 | 0.0138392   |
| 221.32 | 1265.171779 | 2.85532E-05 | 0.006319386 |
| 221.36 | 615.869378  | 1.38993E-05 | 0.003076752 |
| 221.4  | 416.506051  | 9.39996E-06 | 0.002081151 |
| 221.44 | 397.85512   | 8.97904E-06 | 0.001988318 |
| 221.48 | 459.056934  | 1.03603E-05 | 0.002294594 |
| 221.52 | 595.316133  | 1.34355E-05 | 0.002976222 |
| 221.56 | 672.406588  | 1.51753E-05 | 0.003362235 |
| 221.6  | 621.259022  | 1.4021E-05  | 0.003107043 |
| 221.64 | 484.137801  | 1.09263E-05 | 0.002421709 |
| 221.68 | 338.300774  | 7.63498E-06 | 0.001692522 |
| 221.72 | 246.247071  | 5.55745E-06 | 0.001232199 |
| 221.76 | 219.758453  | 4.95964E-06 | 0.00109985  |



|            |             |             |             |
|------------|-------------|-------------|-------------|
| 221.8      | 276.825325  | 6.24756E-06 | 0.001385709 |
| 221.84     | 472.956609  | 1.0674E-05  | 0.002367914 |
| 221.88     | 1007.420351 | 2.27361E-05 | 0.00504468  |
| 221.92     | 2272.48063  | 5.12867E-05 | 0.011381549 |
| 221.96     | 4778.02147  | 0.000107833 | 0.023934677 |
| 222        | 8646.302073 | 0.000195135 | 0.043319969 |
| 222.04     | 12998.02859 | 0.000293347 | 0.065134857 |
| 222.08     | 15792.51607 | 0.000356415 | 0.079152663 |
| 222.12     | 15564.39921 | 0.000351267 | 0.078023384 |
| 222.16     | 12654.97007 | 0.000285605 | 0.063450017 |
| 222.2      | 8605.116094 | 0.000194205 | 0.043152459 |
| 222.24     | 5001.160154 | 0.000112869 | 0.025084055 |
| 222.28     | 2564.528689 | 5.78778E-05 | 0.012865086 |
| 222.32     | 1234.167238 | 2.78534E-05 | 0.006192376 |
| 222.36     | 642.626238  | 1.45032E-05 | 0.003224927 |
| 222.399999 | 456.763307  | 1.03085E-05 | 0.002292613 |
| 222.439999 | 455.294583  | 1.02754E-05 | 0.002285652 |
| 222.479999 | 550.856735  | 1.24321E-05 | 0.002765887 |
| 222.519999 | 711.42022   | 1.60558E-05 | 0.003572728 |
| 222.559999 | 787.252699  | 1.77672E-05 | 0.003954267 |
| 222.599999 | 690.047292  | 1.55734E-05 | 0.00346664  |
| 222.639999 | 515.018373  | 1.16232E-05 | 0.0025878   |
| 222.679999 | 345.455785  | 7.79646E-06 | 0.001736115 |
| 222.719999 | 256.726528  | 5.79396E-06 | 0.001290431 |
| 222.759999 | 265.57532   | 5.99367E-06 | 0.001335149 |
| 222.799999 | 359.756667  | 8.11921E-06 | 0.001808959 |
| 222.839999 | 649.019125  | 1.46475E-05 | 0.003264039 |
| 222.879999 | 1522.533289 | 3.43615E-05 | 0.007658481 |
| 222.919999 | 3590.91921  | 8.1042E-05  | 0.018065893 |
| 222.959999 | 7462.803093 | 0.000168425 | 0.037552054 |
| 222.999999 | 13181.79898 | 0.000297495 | 0.06634135  |
| 223.039999 | 19033.93702 | 0.000429569 | 0.095811169 |
| 223.079999 | 22441.39358 | 0.000506471 | 0.112983549 |
| 223.119999 | 21876.99256 | 0.000493733 | 0.110161762 |
| 223.159999 | 17682.40725 | 0.000399067 | 0.089055859 |
| 223.199999 | 11993.96795 | 0.000270687 | 0.060417372 |
| 223.239999 | 6875.190866 | 0.000155163 | 0.034638695 |
| 223.279999 | 3384.380077 | 7.63807E-05 | 0.017054293 |
| 223.319999 | 1512.49283  | 3.41349E-05 | 0.007622996 |
| 223.359999 | 707.638505  | 1.59704E-05 | 0.003567152 |
| 223.399999 | 440.626917  | 9.94434E-06 | 0.002221565 |
| 223.439999 | 422.239066  | 9.52935E-06 | 0.002129237 |
| 223.479999 | 500.151048  | 1.12877E-05 | 0.002522578 |
| 223.519999 | 599.017628  | 1.3519E-05  | 0.003021765 |
| 223.559999 | 665.891117  | 1.50282E-05 | 0.003359712 |
| 223.599999 | 607.356353  | 1.37072E-05 | 0.003064927 |

|            |             |             |             |
|------------|-------------|-------------|-------------|
| 223.639999 | 468.035105  | 1.05629E-05 | 0.002362287 |
| 223.679999 | 323.669719  | 7.30477E-06 | 0.001633932 |
| 223.719999 | 220.717398  | 4.98128E-06 | 0.001114413 |
| 223.759999 | 195.095136  | 4.40303E-06 | 0.000985221 |
| 223.799999 | 270.359499  | 6.10164E-06 | 0.001365546 |
| 223.839999 | 515.229497  | 1.1628E-05  | 0.002602814 |
| 223.879999 | 1090.490059 | 2.46108E-05 | 0.005509875 |
| 223.919999 | 2259.487613 | 5.09935E-05 | 0.011418462 |
| 223.959999 | 4315.279272 | 9.73898E-05 | 0.021811429 |
| 223.999999 | 7351.928647 | 0.000165923 | 0.037166705 |
| 224.039999 | 10757.43945 | 0.00024278  | 0.054392526 |
| 224.079999 | 13215.37668 | 0.000298253 | 0.066832452 |
| 224.119999 | 13257.14831 | 0.000299195 | 0.067055666 |
| 224.159999 | 10950.68674 | 0.000247142 | 0.055399294 |
| 224.199999 | 7606.853326 | 0.000171676 | 0.038489778 |
| 224.239999 | 4492.015834 | 0.000101379 | 0.022733124 |
| 224.279999 | 2355.880408 | 5.31689E-05 | 0.01192473  |
| 224.319999 | 1193.678533 | 2.69397E-05 | 0.006043105 |
| 224.359999 | 670.404977  | 1.51301E-05 | 0.003394591 |
| 224.399999 | 492.263054  | 1.11097E-05 | 0.002493015 |
| 224.439999 | 502.074058  | 1.13311E-05 | 0.002543155 |
| 224.479999 | 639.826648  | 1.444E-05   | 0.00324149  |
| 224.519999 | 820.012302  | 1.85065E-05 | 0.004155087 |
| 224.559999 | 894.212575  | 2.01811E-05 | 0.004531875 |
| 224.599999 | 776.108767  | 1.75157E-05 | 0.003934025 |
| 224.639999 | 548.180011  | 1.23717E-05 | 0.00277917  |
| 224.679999 | 341.377177  | 7.70441E-06 | 0.001731026 |
| 224.719999 | 232.007968  | 5.2361E-06  | 0.001176656 |
| 224.759999 | 208.214443  | 4.69911E-06 | 0.001056172 |
| 224.799999 | 268.811065  | 6.06669E-06 | 0.001363792 |
| 224.839999 | 509.744022  | 1.15042E-05 | 0.002586607 |
| 224.879999 | 1213.729336 | 2.73922E-05 | 0.006159954 |
| 224.919999 | 2973.137549 | 6.70996E-05 | 0.015092036 |
| 224.959999 | 6514.342828 | 0.00014702  | 0.033073539 |
| 224.999999 | 11952.71177 | 0.000269756 | 0.060695112 |
| 225.039999 | 17940.9291  | 0.000404902 | 0.091119096 |
| 225.079999 | 22076.8124  | 0.000498243 | 0.112144513 |
| 225.119999 | 22323.9201  | 0.00050382  | 0.113419909 |
| 225.159999 | 18765.64264 | 0.000423514 | 0.095358505 |
| 225.199999 | 13218.93211 | 0.000298333 | 0.067184565 |
| 225.239999 | 7853.746473 | 0.000177248 | 0.039923366 |
| 225.279999 | 4030.837636 | 9.09704E-05 | 0.02049381  |
| 225.319999 | 1835.826108 | 4.1432E-05  | 0.009335467 |
| 225.359999 | 843.24756   | 1.90309E-05 | 0.004288809 |
| 225.399999 | 529.34274   | 1.19465E-05 | 0.002692747 |
| 225.439999 | 504.231361  | 1.13798E-05 | 0.002565462 |

|            |             |             |             |
|------------|-------------|-------------|-------------|
| 225.479999 | 586.582039  | 1.32383E-05 | 0.002984981 |
| 225.519999 | 693.579334  | 1.56531E-05 | 0.003530091 |
| 225.559999 | 766.571706  | 1.73005E-05 | 0.003902291 |
| 225.599999 | 708.509698  | 1.59901E-05 | 0.003607361 |
| 225.639999 | 531.253807  | 1.19897E-05 | 0.002705347 |
| 225.679999 | 355.971025  | 8.03377E-06 | 0.001813061 |
| 225.719999 | 260.963968  | 5.88959E-06 | 0.001329399 |
| 225.759999 | 244.418354  | 5.51618E-06 | 0.001245333 |
| 225.799999 | 292.529264  | 6.60198E-06 | 0.001490727 |
| 225.839999 | 460.509791  | 1.03931E-05 | 0.00234717  |
| 225.879999 | 911.53271   | 2.0572E-05  | 0.004646809 |
| 225.919999 | 1965.558923 | 4.43599E-05 | 0.010021795 |
| 225.959999 | 3868.604182 | 8.7309E-05  | 0.019728343 |
| 225.999999 | 6742.646255 | 0.000152172 | 0.034390902 |
| 226.039999 | 10242.98927 | 0.00023117  | 0.052253667 |
| 226.079999 | 12962.14513 | 0.000292538 | 0.066136891 |
| 226.119999 | 13510.98516 | 0.000304924 | 0.068949441 |
| 226.159999 | 11708.03109 | 0.000264234 | 0.059759151 |
| 226.199999 | 8587.876902 | 0.000193816 | 0.043841274 |
| 226.239999 | 5405.660837 | 0.000121998 | 0.027600881 |
| 226.279999 | 2959.745925 | 6.67973E-05 | 0.015114903 |
| 226.319999 | 1456.059535 | 3.28612E-05 | 0.007437155 |
| 226.359999 | 718.47185   | 1.62149E-05 | 0.003670407 |
| 226.399999 | 476.927399  | 1.07636E-05 | 0.002436876 |
| 226.439999 | 463.020835  | 1.04497E-05 | 0.002366238 |
| 226.479999 | 562.319916  | 1.26908E-05 | 0.002874207 |
| 226.519999 | 701.152643  | 1.5824E-05  | 0.003584461 |
| 226.559999 | 757.689369  | 1.71E-05    | 0.003874175 |
| 226.599999 | 692.84747   | 1.56366E-05 | 0.003543254 |
| 226.639999 | 550.581247  | 1.24259E-05 | 0.002816195 |
| 226.679999 | 382.560236  | 8.63385E-06 | 0.001957121 |
| 226.719999 | 256.130005  | 5.7805E-06  | 0.001310554 |
| 226.759999 | 189.549684  | 4.27787E-06 | 0.00097005  |
| 226.799999 | 196.460908  | 4.43385E-06 | 0.001005597 |
| 226.839999 | 329.935563  | 7.44619E-06 | 0.001689093 |
| 226.879999 | 788.832632  | 1.78029E-05 | 0.004039111 |
| 226.919999 | 2049.537032 | 4.62552E-05 | 0.010496229 |
| 226.959999 | 4852.772936 | 0.00010952  | 0.024856733 |
| 226.999999 | 9691.961062 | 0.000218734 | 0.049652632 |
| 227.039999 | 15632.09591 | 0.000352795 | 0.080098493 |
| 227.079999 | 20548.62946 | 0.000463754 | 0.105309245 |
| 227.119999 | 22291.87401 | 0.000503097 | 0.114263287 |
| 227.159999 | 20209.9593  | 0.000456111 | 0.103610091 |
| 227.199999 | 15472.37594 | 0.00034919  | 0.079335962 |
| 227.239999 | 10099.12618 | 0.000227923 | 0.05179327  |
| 227.279999 | 5687.71566  | 0.000128364 | 0.029174529 |

|            |             |             |             |
|------------|-------------|-------------|-------------|
| 227.319999 | 2829.513007 | 6.38582E-05 | 0.014516239 |
| 227.359999 | 1311.354469 | 2.95954E-05 | 0.00672882  |
| 227.399999 | 677.519037  | 1.52907E-05 | 0.003477096 |
| 227.439999 | 486.872634  | 1.0988E-05  | 0.002499119 |
| 227.479999 | 495.168665  | 1.11753E-05 | 0.00254215  |
| 227.519999 | 595.537447  | 1.34405E-05 | 0.003057971 |
| 227.559999 | 682.63895   | 1.54062E-05 | 0.003505837 |
| 227.599999 | 653.684787  | 1.47528E-05 | 0.003357727 |
| 227.639999 | 508.052303  | 1.1466E-05  | 0.002610128 |
| 227.679999 | 331.595826  | 7.48366E-06 | 0.001703879 |
| 227.719999 | 224.789907  | 5.0732E-06  | 0.001155268 |
| 227.759999 | 197.3442    | 4.45378E-06 | 0.001014394 |
| 227.799999 | 230.17902   | 5.19482E-06 | 0.00118338  |
| 227.839999 | 361.049159  | 8.14838E-06 | 0.001856526 |
| 227.879999 | 717.366511  | 1.619E-05   | 0.003689369 |
| 227.919999 | 1516.036413 | 3.42148E-05 | 0.007798244 |
| 227.959999 | 3117.512793 | 7.03579E-05 | 0.016038792 |
| 227.999999 | 5695.198905 | 0.000128533 | 0.029305457 |
| 228.039999 | 8848.469544 | 0.000199698 | 0.045539048 |
| 228.079999 | 11536.4751  | 0.000260362 | 0.059383404 |
| 228.119999 | 12596.77355 | 0.000284292 | 0.064852607 |
| 228.159999 | 11895.33969 | 0.000268461 | 0.061252118 |
| 228.199999 | 9911.773127 | 0.000223695 | 0.051047179 |
| 228.239999 | 7316.766521 | 0.000165129 | 0.037689095 |
| 228.279999 | 4846.932963 | 0.000109389 | 0.024971213 |
| 228.319999 | 2864.289577 | 6.4643E-05  | 0.014759296 |
| 228.359999 | 1555.653508 | 3.51089E-05 | 0.008017476 |
| 228.399999 | 851.813015  | 1.92242E-05 | 0.004390815 |
| 228.439999 | 551.081362  | 1.24371E-05 | 0.00284114  |
| 228.479999 | 498.293993  | 1.12458E-05 | 0.002569441 |
| 228.519999 | 568.421037  | 1.28285E-05 | 0.002931562 |
| 228.559999 | 617.443473  | 1.39348E-05 | 0.003184947 |
| 228.599999 | 570.305511  | 1.2871E-05  | 0.002942311 |
| 228.639999 | 456.507491  | 1.03027E-05 | 0.002355618 |
| 228.679999 | 328.515685  | 7.41414E-06 | 0.001695466 |
| 228.719999 | 219.460668  | 4.95292E-06 | 0.001132832 |
| 228.759999 | 169.661278  | 3.82902E-06 | 0.000875926 |
| 228.799999 | 185.544301  | 4.18748E-06 | 0.000958095 |
| 228.839999 | 321.448364  | 7.25464E-06 | 0.001660152 |
| 228.879999 | 785.609933  | 1.77301E-05 | 0.00405807  |
| 228.919999 | 2000.722268 | 4.51535E-05 | 0.010336543 |
| 228.959999 | 4498.084523 | 0.000101516 | 0.023242989 |
| 228.999999 | 8410.112366 | 0.000189805 | 0.043465235 |
| 229.039999 | 12922.49857 | 0.000291643 | 0.066797865 |
| 229.079999 | 16199.85842 | 0.000365608 | 0.083753535 |
| 229.119999 | 16709.92912 | 0.00037712  | 0.086405694 |

|            |             |             |             |
|------------|-------------|-------------|-------------|
| 229.159999 | 14314.59417 | 0.00032306  | 0.074032533 |
| 229.199999 | 10361.06651 | 0.000233835 | 0.053594945 |
| 229.239999 | 6404.865876 | 0.000144549 | 0.03313639  |
| 229.279999 | 3438.790002 | 7.76087E-05 | 0.017794123 |
| 229.319999 | 1682.078454 | 3.79622E-05 | 0.008705484 |
| 229.359999 | 830.381774  | 1.87406E-05 | 0.004298335 |
| 229.399999 | 497.6372    | 1.1231E-05  | 0.002576386 |
| 229.439999 | 445.790868  | 1.00609E-05 | 0.002308368 |
| 229.479999 | 532.305478  | 1.20134E-05 | 0.002756833 |
| 229.519999 | 611.221773  | 1.37944E-05 | 0.003166096 |
| 229.559999 | 631.579541  | 1.42539E-05 | 0.003272119 |
| 229.599999 | 553.980917  | 1.25026E-05 | 0.002870592 |
| 229.639999 | 425.542996  | 9.60391E-06 | 0.002205442 |
| 229.679999 | 302.346616  | 6.82354E-06 | 0.001567231 |
| 229.719999 | 216.792646  | 4.89271E-06 | 0.001123953 |
| 229.759999 | 169.269539  | 3.82018E-06 | 0.000877724 |
| 229.799999 | 176.745904  | 3.98891E-06 | 0.000916651 |
| 229.839999 | 272.096352  | 6.14084E-06 | 0.00141141  |
| 229.879999 | 600.795963  | 1.35591E-05 | 0.003116972 |
| 229.919999 | 1502.402395 | 3.39071E-05 | 0.007795927 |
| 229.959999 | 3406.474927 | 7.68794E-05 | 0.017679185 |
| 229.999999 | 6383.823612 | 0.000144074 | 0.033137021 |
| 230.039999 | 9590.261688 | 0.000216439 | 0.049789592 |
| 230.079999 | 11754.73436 | 0.000265288 | 0.061037458 |
| 230.119999 | 11882.05439 | 0.000268161 | 0.061709305 |
| 230.159999 | 9842.024497 | 0.000222121 | 0.051123319 |
| 230.199999 | 6795.556551 | 0.000153366 | 0.03530491  |
| 230.239999 | 4036.89775  | 9.11072E-05 | 0.020976512 |
| 230.279999 | 2142.8247   | 4.83606E-05 | 0.011136472 |
| 230.319999 | 1108.5169   | 2.50177E-05 | 0.005762073 |
| 230.359999 | 638.687778  | 1.44143E-05 | 0.003320477 |
| 230.399999 | 471.827589  | 1.06485E-05 | 0.002453412 |
| 230.439999 | 498.885732  | 1.12592E-05 | 0.00259456  |
| 230.479999 | 615.047729  | 1.38808E-05 | 0.00319924  |
| 230.519999 | 682.225381  | 1.53969E-05 | 0.003549288 |
| 230.559999 | 663.077755  | 1.49647E-05 | 0.003450271 |
| 230.599999 | 571.31192   | 1.28937E-05 | 0.00297329  |
| 230.639999 | 428.528353  | 9.67129E-06 | 0.002230586 |
| 230.679999 | 291.103531  | 6.5698E-06  | 0.001515522 |
| 230.719999 | 214.31854   | 4.83687E-06 | 0.001115963 |
| 230.759999 | 194.702148  | 4.39416E-06 | 0.001013995 |
| 230.799999 | 250.759489  | 5.65929E-06 | 0.001306165 |
| 230.839999 | 483.668125  | 1.09157E-05 | 0.002519784 |
| 230.879999 | 1141.016415 | 2.57512E-05 | 0.005945426 |
| 230.919999 | 2658.488443 | 5.99984E-05 | 0.013854826 |
| 230.959999 | 5611.975751 | 0.000126654 | 0.029252118 |

|            |             |             |             |
|------------|-------------|-------------|-------------|
| 230.999999 | 9805.888838 | 0.000221305 | 0.051121513 |
| 231.039999 | 14087.26591 | 0.00031793  | 0.07345454  |
| 231.079999 | 16595.75446 | 0.000374543 | 0.08654941  |
| 231.119999 | 16128.73466 | 0.000364003 | 0.084128391 |
| 231.159999 | 13041.5001  | 0.000294328 | 0.068036974 |
| 231.199999 | 8856.530967 | 0.00019988  | 0.046212156 |
| 231.239999 | 5160.801346 | 0.000116472 | 0.026933008 |
| 231.279999 | 2642.471906 | 5.96369E-05 | 0.013792825 |
| 231.319999 | 1259.759958 | 2.8431E-05  | 0.006576665 |
| 231.359999 | 655.653266  | 1.47972E-05 | 0.003423476 |
| 231.399999 | 458.988928  | 1.03587E-05 | 0.002397013 |
| 231.439999 | 436.303669  | 9.84677E-06 | 0.002278936 |
| 231.479999 | 500.900089  | 1.13046E-05 | 0.002616793 |
| 231.519999 | 598.785684  | 1.35138E-05 | 0.003128705 |
| 231.559999 | 633.075608  | 1.42876E-05 | 0.003308445 |
| 231.599999 | 570.783014  | 1.28818E-05 | 0.00298342  |
| 231.639999 | 433.404348  | 9.78133E-06 | 0.002265748 |
| 231.679999 | 294.258907  | 6.64101E-06 | 0.00153859  |
| 231.719999 | 199.969646  | 4.51304E-06 | 0.001045761 |
| 231.759999 | 171.765601  | 3.87651E-06 | 0.00089842  |
| 231.799999 | 227.382302  | 5.1317E-06  | 0.001189528 |
| 231.839999 | 392.003261  | 8.84697E-06 | 0.002051081 |
| 231.879999 | 806.374315  | 1.81987E-05 | 0.004219925 |
| 231.919999 | 1715.326951 | 3.87125E-05 | 0.008978212 |
| 231.959999 | 3474.689193 | 7.84189E-05 | 0.018190047 |
| 231.999999 | 6172.214307 | 0.000139298 | 0.032317201 |
| 232.039999 | 9035.321409 | 0.000203915 | 0.047316348 |
| 232.079999 | 10785.05504 | 0.000243404 | 0.056489123 |
| 232.119999 | 10618.32485 | 0.000239641 | 0.055625423 |
| 232.159999 | 8697.692098 | 0.000196295 | 0.0455718   |
| 232.199999 | 5959.627198 | 0.0001345   | 0.031231012 |
| 232.239999 | 3503.870297 | 7.90775E-05 | 0.018364952 |
| 232.279999 | 1853.366187 | 4.18279E-05 | 0.009715783 |
| 232.319999 | 961.47616   | 2.16992E-05 | 0.005041153 |
| 232.359999 | 589.267546  | 1.32989E-05 | 0.003090143 |
| 232.399999 | 508.220075  | 1.14698E-05 | 0.002665586 |
| 232.439999 | 598.06609   | 1.34975E-05 | 0.003137363 |
| 232.479999 | 799.628147  | 1.80465E-05 | 0.004195449 |
| 232.519999 | 976.808453  | 2.20452E-05 | 0.005125951 |
| 232.559999 | 1019.220701 | 2.30024E-05 | 0.005349436 |
| 232.599999 | 862.661119  | 1.94691E-05 | 0.004528503 |
| 232.639999 | 590.577857  | 1.33285E-05 | 0.003100747 |
| 232.679999 | 363.301946  | 8.19922E-06 | 0.001907794 |
| 232.719999 | 258.96022   | 5.84437E-06 | 0.001360102 |
| 232.759999 | 257.096871  | 5.80232E-06 | 0.001350548 |
| 232.799999 | 327.34444   | 7.38771E-06 | 0.001719858 |

|            |             |             |             |
|------------|-------------|-------------|-------------|
| 232.839999 | 549.888199  | 1.24102E-05 | 0.002889593 |
| 232.879999 | 1136.673693 | 2.56531E-05 | 0.005974104 |
| 232.919999 | 2548.635131 | 5.75191E-05 | 0.013397359 |
| 232.959999 | 5355.646814 | 0.000120869 | 0.028157756 |
| 232.999999 | 9487.71125  | 0.000214124 | 0.049890991 |
| 233.039999 | 13782.87072 | 0.00031106  | 0.072489467 |
| 233.079999 | 16449.35546 | 0.000371239 | 0.086528395 |
| 233.119999 | 16298.87447 | 0.000367843 | 0.085751535 |
| 233.159999 | 13397.3596  | 0.00030236  | 0.070498198 |
| 233.199999 | 9212.787144 | 0.00020792  | 0.048486891 |
| 233.239999 | 5392.354526 | 0.000121698 | 0.028384825 |
| 233.279999 | 2758.300006 | 6.2251E-05  | 0.014521911 |
| 233.319999 | 1325.395103 | 2.99123E-05 | 0.006979143 |
| 233.359999 | 690.942193  | 1.55936E-05 | 0.003638923 |
| 233.399999 | 467.347936  | 1.05474E-05 | 0.002461761 |
| 233.439999 | 462.044617  | 1.04277E-05 | 0.002434243 |
| 233.479999 | 581.567798  | 1.31252E-05 | 0.003064466 |
| 233.519999 | 754.544841  | 1.7029E-05  | 0.003976618 |
| 233.559999 | 839.344915  | 1.89428E-05 | 0.004424291 |
| 233.599999 | 756.219978  | 1.70668E-05 | 0.003986812 |
| 233.639999 | 569.500511  | 1.28528E-05 | 0.003002936 |
| 233.679999 | 401.07653   | 9.05174E-06 | 0.00211521  |
| 233.719999 | 275.850628  | 6.22556E-06 | 0.001455039 |
| 233.759999 | 199.451582  | 4.50134E-06 | 0.001052234 |
| 233.799999 | 196.877805  | 4.44326E-06 | 0.001038834 |
| 233.839999 | 313.759326  | 7.08111E-06 | 0.001655847 |
| 233.879999 | 646.587479  | 1.45926E-05 | 0.003412912 |
| 233.919999 | 1447.170873 | 3.26606E-05 | 0.007639975 |
| 233.959999 | 3082.716991 | 6.95726E-05 | 0.016277212 |
| 233.999999 | 5639.511564 | 0.000127276 | 0.029782565 |
| 234.039999 | 8369.154287 | 0.00018888  | 0.044205511 |
| 234.079999 | 10202.00772 | 0.000230245 | 0.053895774 |
| 234.119999 | 10251.8384  | 0.00023137  | 0.054168277 |
| 234.159999 | 8502.908711 | 0.000191899 | 0.044935024 |
| 234.199999 | 5931.47053  | 0.000133865 | 0.031351189 |
| 234.239999 | 3537.2977   | 7.98319E-05 | 0.01869982  |
| 234.279999 | 1864.785493 | 4.20856E-05 | 0.009859817 |
| 234.319999 | 949.356682  | 2.14257E-05 | 0.00502046  |
| 234.359999 | 550.980903  | 1.24349E-05 | 0.002914236 |
| 234.399999 | 420.723415  | 9.49514E-06 | 0.002225661 |
| 234.439999 | 417.405393  | 9.42026E-06 | 0.002208485 |
| 234.479999 | 472.094877  | 1.06545E-05 | 0.002498273 |
| 234.519999 | 583.516051  | 1.31691E-05 | 0.003088428 |
| 234.559999 | 674.861013  | 1.52307E-05 | 0.003572507 |
| 234.599999 | 622.169292  | 1.40415E-05 | 0.003294135 |
| 234.639999 | 483.428913  | 1.09103E-05 | 0.002559997 |

|            |             |             |             |
|------------|-------------|-------------|-------------|
| 234.679999 | 353.28451   | 7.97314E-06 | 0.001871136 |
| 234.719999 | 282.089471  | 6.36637E-06 | 0.001494314 |
| 234.759999 | 306.574727  | 6.91896E-06 | 0.001624296 |
| 234.799999 | 500.330113  | 1.12918E-05 | 0.002651304 |
| 234.839999 | 952.172428  | 2.14892E-05 | 0.005046525 |
| 234.879999 | 1880.843057 | 4.2448E-05  | 0.009970188 |
| 234.919999 | 3632.635685 | 8.19835E-05 | 0.01925957  |
| 234.959999 | 6598.725941 | 0.000148924 | 0.034991195 |
| 234.999999 | 10876.72873 | 0.000245473 | 0.057686065 |
| 235.039999 | 15519.53286 | 0.000350254 | 0.082323756 |
| 235.079999 | 18665.67428 | 0.000421258 | 0.099029394 |
| 235.119999 | 18837.13166 | 0.000425128 | 0.099956053 |
| 235.159999 | 16156.89447 | 0.000364639 | 0.085748414 |
| 235.199999 | 11745.302   | 0.000265075 | 0.062345665 |
| 235.239999 | 7272.872673 | 0.000164139 | 0.038611966 |
| 235.279999 | 3894.083219 | 8.7884E-05  | 0.020677355 |
| 235.319999 | 1843.046744 | 4.1595E-05  | 0.009788135 |
| 235.359999 | 882.452793  | 1.99157E-05 | 0.004687366 |
| 235.399999 | 562.612214  | 1.26974E-05 | 0.002988962 |
| 235.439999 | 499.070386  | 1.12633E-05 | 0.002651837 |
| 235.479999 | 528.079909  | 1.1918E-05  | 0.002806457 |
| 235.519999 | 602.441082  | 1.35963E-05 | 0.00320219  |
| 235.559999 | 656.760167  | 1.48222E-05 | 0.003491509 |
| 235.599999 | 615.524593  | 1.38915E-05 | 0.003272845 |
| 235.639999 | 496.888097  | 1.12141E-05 | 0.002642484 |
| 235.679999 | 362.02346   | 8.17037E-06 | 0.001925592 |
| 235.719999 | 274.377671  | 6.19232E-06 | 0.001459654 |
| 235.759999 | 254.27155   | 5.73855E-06 | 0.001352922 |
| 235.799999 | 350.52655   | 7.9109E-06  | 0.001865389 |
| 235.839999 | 587.156412  | 1.32513E-05 | 0.003125187 |
| 235.879999 | 1120.693592 | 2.52925E-05 | 0.005965993 |
| 235.919999 | 2179.154169 | 4.91805E-05 | 0.011602657 |
| 235.959999 | 3930.857685 | 8.8714E-05  | 0.020932951 |
| 235.999999 | 6456.539649 | 0.000145715 | 0.034388765 |
| 236.039999 | 9319.917867 | 0.000210338 | 0.049648079 |
| 236.079999 | 11213.8875  | 0.000253082 | 0.059747556 |
| 236.119999 | 11202.37455 | 0.000252822 | 0.059696328 |
| 236.159999 | 9473.482464 | 0.000213803 | 0.050491788 |
| 236.199999 | 6823.505633 | 0.000153997 | 0.036374095 |
| 236.239999 | 4189.251735 | 9.45456E-05 | 0.022335447 |
| 236.279999 | 2250.206752 | 5.0784E-05  | 0.011999251 |
| 236.319999 | 1128.632554 | 2.54717E-05 | 0.006019464 |
| 236.359999 | 600.878762  | 1.3561E-05  | 0.003205277 |
| 236.399999 | 405.291822  | 9.14687E-06 | 0.002162321 |
| 236.439999 | 368.575232  | 8.31823E-06 | 0.001966762 |
| 236.479999 | 397.381299  | 8.96834E-06 | 0.002120834 |



|            |             |             |             |
|------------|-------------|-------------|-------------|
| 236.519999 | 496.281838  | 1.12004E-05 | 0.002649116 |
| 236.559999 | 568.915384  | 1.28396E-05 | 0.003037342 |
| 236.599999 | 556.809006  | 1.25664E-05 | 0.002973211 |
| 236.639999 | 478.506732  | 1.07992E-05 | 0.00255553  |
| 236.679999 | 371.75499   | 8.38999E-06 | 0.001985743 |
| 236.719999 | 298.898422  | 6.74572E-06 | 0.001596847 |
| 236.759999 | 308.709929  | 6.96715E-06 | 0.001649543 |
| 236.799999 | 487.396461  | 1.09999E-05 | 0.002604767 |
| 236.839999 | 920.619965  | 2.07771E-05 | 0.004920851 |
| 236.879999 | 1738.099984 | 3.92265E-05 | 0.009291972 |
| 236.919999 | 3163.853787 | 7.14038E-05 | 0.016916982 |
| 236.959999 | 5626.690394 | 0.000126987 | 0.030090736 |
| 236.999999 | 9449.8599   | 0.00021327  | 0.050545031 |
| 237.039999 | 13869.92319 | 0.000313025 | 0.074199409 |
| 237.079999 | 17059.02485 | 0.000384998 | 0.091275427 |
| 237.119999 | 17543.55877 | 0.000395934 | 0.093883795 |
| 237.159999 | 15064.64678 | 0.000339988 | 0.080631576 |
| 237.199999 | 10804.03648 | 0.000243832 | 0.057836963 |
| 237.239999 | 6585.879977 | 0.000148634 | 0.035261963 |
| 237.279999 | 3473.259968 | 7.83866E-05 | 0.018599582 |
| 237.319999 | 1649.505926 | 3.72271E-05 | 0.008834724 |
| 237.359999 | 796.490892  | 1.79757E-05 | 0.00426671  |
| 237.399999 | 498.841834  | 1.12582E-05 | 0.002672688 |
| 237.439999 | 424.130792  | 9.57204E-06 | 0.002272785 |
| 237.479999 | 447.15492   | 1.00917E-05 | 0.002396568 |
| 237.519999 | 529.091013  | 1.19408E-05 | 0.00283619  |
| 237.559999 | 599.403563  | 1.35277E-05 | 0.003213641 |
| 237.599999 | 591.721253  | 1.33543E-05 | 0.003172987 |
| 237.639999 | 485.926274  | 1.09667E-05 | 0.002606122 |
| 237.679999 | 352.225207  | 7.94923E-06 | 0.001889374 |
| 237.719999 | 261.290482  | 5.89696E-06 | 0.001401826 |
| 237.759999 | 234.152032  | 5.28449E-06 | 0.001256439 |
| 237.799999 | 274.850676  | 6.203E-06   | 0.001475073 |
| 237.839999 | 450.587332  | 1.01691E-05 | 0.002418626 |
| 237.879999 | 904.130831  | 2.0405E-05  | 0.004853935 |
| 237.919999 | 1912.969624 | 4.31731E-05 | 0.010271734 |
| 237.959999 | 3878.660024 | 8.7536E-05  | 0.020830056 |
| 237.999999 | 6908.170104 | 0.000155908 | 0.037106051 |
| 238.039999 | 10350.05268 | 0.000233586 | 0.055602876 |
| 238.079999 | 12733.84063 | 0.000287385 | 0.068420632 |
| 238.119999 | 12694.68945 | 0.000286501 | 0.068221727 |
| 238.159999 | 10438.51561 | 0.000235583 | 0.056106389 |
| 238.199999 | 7169.633945 | 0.000161809 | 0.038542821 |
| 238.239999 | 4209.295586 | 9.49979E-05 | 0.022632309 |
| 238.279999 | 2204.250527 | 4.97469E-05 | 0.011853683 |
| 238.319999 | 1094.394742 | 2.4699E-05  | 0.005886257 |

|            |             |             |             |
|------------|-------------|-------------|-------------|
| 238.359999 | 593.57327   | 1.33961E-05 | 0.0031931   |
| 238.399999 | 435.251895  | 9.82303E-06 | 0.00234181  |
| 238.439999 | 428.634432  | 9.67368E-06 | 0.002306593 |
| 238.479999 | 468.625069  | 1.05762E-05 | 0.002522216 |
| 238.519999 | 516.713424  | 1.16615E-05 | 0.002781502 |
| 238.559999 | 539.640703  | 1.21789E-05 | 0.002905408 |
| 238.599999 | 511.12512   | 1.15354E-05 | 0.002752342 |
| 238.639999 | 407.926529  | 9.20633E-06 | 0.002196999 |
| 238.679999 | 293.47934   | 6.62342E-06 | 0.001580878 |
| 238.719999 | 207.092228  | 4.67378E-06 | 0.001115726 |
| 238.759999 | 176.993336  | 3.99449E-06 | 0.000953725 |
| 238.799999 | 213.616781  | 4.82103E-06 | 0.001151263 |
| 238.839999 | 370.082605  | 8.35225E-06 | 0.001994851 |
| 238.879999 | 860.083982  | 1.94109E-05 | 0.004636875 |
| 238.919999 | 2017.814557 | 4.55393E-05 | 0.010880241 |
| 238.959999 | 4347.093189 | 9.81078E-05 | 0.023443849 |
| 238.999999 | 8078.869452 | 0.000182329 | 0.04357659  |
| 239.039999 | 12418.25447 | 0.000280263 | 0.066993997 |
| 239.079999 | 15702.33794 | 0.00035438  | 0.084725145 |
| 239.119999 | 16332.04651 | 0.000368592 | 0.088137609 |
| 239.159999 | 14026.86253 | 0.000316567 | 0.075710103 |
| 239.199999 | 10128.24983 | 0.00022858  | 0.054676453 |
| 239.239999 | 6279.84868  | 0.000141727 | 0.033906872 |
| 239.279999 | 3364.769566 | 7.59382E-05 | 0.018170483 |
| 239.319999 | 1608.799614 | 3.63084E-05 | 0.008689318 |
| 239.359999 | 778.140667  | 1.75616E-05 | 0.004203533 |
| 239.399999 | 472.005261  | 1.06525E-05 | 0.002550209 |
| 239.439999 | 415.760824  | 9.38314E-06 | 0.0022467   |
| 239.479999 | 480.26466   | 1.08389E-05 | 0.002595701 |
| 239.519999 | 576.801565  | 1.30176E-05 | 0.003117977 |
| 239.559999 | 588.347621  | 1.32782E-05 | 0.003180922 |
| 239.599999 | 509.501399  | 1.14987E-05 | 0.002755097 |
| 239.639999 | 394.101067  | 8.89431E-06 | 0.002131433 |
| 239.679999 | 275.779301  | 6.22395E-06 | 0.001491757 |
| 239.719999 | 197.734114  | 4.46258E-06 | 0.001069771 |
| 239.759999 | 164.361434  | 3.70941E-06 | 0.000889368 |
| 239.799999 | 174.824344  | 3.94554E-06 | 0.000946141 |
| 239.839999 | 288.271203  | 6.50588E-06 | 0.00156037  |
| 239.879999 | 622.687204  | 1.40532E-05 | 0.003371077 |
| 239.919999 | 1424.483264 | 3.21486E-05 | 0.007713093 |
| 239.959999 | 3052.67566  | 6.88946E-05 | 0.016531957 |
| 239.999999 | 5709.593685 | 0.000128858 | 0.030925818 |
| 240.039999 | 8784.713167 | 0.000198259 | 0.047590028 |
| 240.079999 | 10967.42216 | 0.000247519 | 0.059424467 |
| 240.119999 | 11244.74033 | 0.000253778 | 0.060937204 |
| 240.159999 | 9520.576575 | 0.000214866 | 0.051602255 |

|            |             |             |             |
|------------|-------------|-------------|-------------|
| 240.199999 | 6712.320383 | 0.000151488 | 0.036387351 |
| 240.239999 | 4053.816624 | 9.1489E-05  | 0.021979316 |
| 240.279999 | 2205.678879 | 4.97791E-05 | 0.011960922 |
| 240.319999 | 1146.634399 | 2.58779E-05 | 0.006218987 |
| 240.359999 | 631.584162  | 1.4254E-05  | 0.003426085 |
| 240.399999 | 439.771316  | 9.92503E-06 | 0.002385976 |
| 240.439999 | 428.782432  | 9.67702E-06 | 0.002326743 |
| 240.479999 | 497.109428  | 1.12191E-05 | 0.002697961 |
| 240.519999 | 549.840132  | 1.24091E-05 | 0.002984643 |
| 240.559999 | 550.049086  | 1.24138E-05 | 0.002986274 |
| 240.599999 | 490.676748  | 1.10739E-05 | 0.002664378 |
| 240.639999 | 402.886162  | 9.09258E-06 | 0.002188038 |
| 240.679999 | 315.702187  | 7.12496E-06 | 0.001714835 |
| 240.719999 | 278.378076  | 6.28261E-06 | 0.001512349 |
| 240.759999 | 341.519469  | 7.70762E-06 | 0.001855686 |
| 240.799999 | 588.903871  | 1.32907E-05 | 0.00320041  |
| 240.839999 | 1255.012625 | 2.83239E-05 | 0.006821525 |
| 240.879999 | 2706.212313 | 6.10754E-05 | 0.014711853 |
| 240.919999 | 5262.104122 | 0.000118758 | 0.028611264 |
| 240.959999 | 8925.638404 | 0.000201439 | 0.048538796 |
| 240.999999 | 13208.15388 | 0.00029809  | 0.071839602 |
| 241.039999 | 17118.00336 | 0.000386329 | 0.09312086  |
| 241.079999 | 19202.37784 | 0.000433371 | 0.104477061 |
| 241.119999 | 18422.48114 | 0.00041577  | 0.100250399 |
| 241.159999 | 15296.21581 | 0.000345214 | 0.083251877 |
| 241.199999 | 11081.96797 | 0.000250105 | 0.060325225 |
| 241.239999 | 7044.402429 | 0.000158982 | 0.038352902 |
| 241.279999 | 3967.317233 | 8.95368E-05 | 0.021603445 |
| 241.319999 | 2019.45367  | 4.55763E-05 | 0.010998462 |
| 241.359999 | 1009.553072 | 2.27842E-05 | 0.005499196 |
| 241.399999 | 592.696022  | 1.33763E-05 | 0.003229045 |
| 241.439999 | 495.021434  | 1.11719E-05 | 0.002697354 |
| 241.479999 | 568.405061  | 1.28281E-05 | 0.003097732 |
| 241.519999 | 713.49279   | 1.61025E-05 | 0.003889085 |
| 241.559999 | 799.352233  | 1.80403E-05 | 0.004357807 |
| 241.599999 | 712.756508  | 1.60859E-05 | 0.003886359 |
| 241.639999 | 534.925356  | 1.20725E-05 | 0.002917204 |
| 241.679999 | 374.502887  | 8.45201E-06 | 0.002042681 |
| 241.719999 | 261.395943  | 5.89934E-06 | 0.001425989 |
| 241.759999 | 224.041565  | 5.05631E-06 | 0.001222413 |
| 241.799999 | 270.614573  | 6.10739E-06 | 0.001476768 |
| 241.839999 | 437.792248  | 9.88036E-06 | 0.002389467 |
| 241.879999 | 872.798034  | 1.96978E-05 | 0.004764513 |
| 241.919999 | 1781.595025 | 4.02081E-05 | 0.009727148 |
| 241.959999 | 3448.346789 | 7.78244E-05 | 0.018830388 |
| 241.999999 | 5997.009249 | 0.000135344 | 0.032753283 |

|            |             |             |             |
|------------|-------------|-------------|-------------|
| 242.039999 | 8883.740954 | 0.000200494 | 0.048527485 |
| 242.079999 | 10872.44657 | 0.000245376 | 0.059400616 |
| 242.119999 | 11102.30874 | 0.000250564 | 0.060666469 |
| 242.159999 | 9503.640013 | 0.000214484 | 0.051939425 |
| 242.199999 | 6932.955099 | 0.000156467 | 0.037896341 |
| 242.239999 | 4395.617056 | 9.9203E-05  | 0.024030924 |
| 242.279999 | 2519.95643  | 5.68719E-05 | 0.013778925 |
| 242.319999 | 1379.123264 | 3.11249E-05 | 0.007542184 |
| 242.359999 | 780.251383  | 1.76092E-05 | 0.004267763 |
| 242.399999 | 508.377871  | 1.14734E-05 | 0.002781147 |
| 242.439999 | 423.028222  | 9.54716E-06 | 0.002314613 |
| 242.479999 | 459.564531  | 1.03717E-05 | 0.002514937 |
| 242.519999 | 552.94111   | 1.24791E-05 | 0.003026434 |
| 242.559999 | 607.314769  | 1.37062E-05 | 0.003324588 |
| 242.599999 | 573.321116  | 1.29391E-05 | 0.003139016 |
| 242.639999 | 475.697659  | 1.07358E-05 | 0.002604943 |
| 242.679999 | 347.97117   | 7.85322E-06 | 0.001905821 |
| 242.719999 | 248.829532  | 5.61574E-06 | 0.001363051 |
| 242.759999 | 231.745667  | 5.23018E-06 | 0.001269678 |
| 242.799999 | 295.935736  | 6.67886E-06 | 0.001621627 |
| 242.839999 | 531.197264  | 1.19884E-05 | 0.002911259 |
| 242.879999 | 1173.67414  | 2.64882E-05 | 0.006433452 |
| 242.919999 | 2647.762556 | 5.97563E-05 | 0.014516003 |
| 242.959999 | 5471.190224 | 0.000123477 | 0.030000006 |
| 242.999999 | 9707.45048  | 0.000219084 | 0.053237323 |
| 243.039999 | 14339.42113 | 0.000323621 | 0.07865279  |
| 243.079999 | 17218.23508 | 0.000388592 | 0.094458842 |
| 243.119999 | 17015.88844 | 0.000384025 | 0.093364134 |
| 243.159999 | 14197.2006  | 0.000320411 | 0.077911149 |
| 243.199999 | 10101.04409 | 0.000227966 | 0.055441451 |
| 243.239999 | 6152.129942 | 0.000138845 | 0.033772659 |
| 243.279999 | 3288.770647 | 7.4223E-05  | 0.018056965 |
| 243.319999 | 1618.897843 | 3.65363E-05 | 0.008890005 |
| 243.359999 | 818.1427    | 1.84643E-05 | 0.004493482 |
| 243.399999 | 501.131425  | 1.13098E-05 | 0.002752815 |
| 243.439999 | 421.891376  | 9.5215E-06  | 0.002317914 |
| 243.479999 | 481.488409  | 1.08665E-05 | 0.002645781 |
| 243.519999 | 598.146541  | 1.34993E-05 | 0.003287358 |
| 243.559999 | 717.840645  | 1.62007E-05 | 0.003945834 |
| 243.599999 | 718.394376  | 1.62132E-05 | 0.003949526 |
| 243.639999 | 591.5044    | 1.33494E-05 | 0.003252455 |
| 243.679999 | 431.584614  | 9.74026E-06 | 0.002373507 |
| 243.719999 | 281.341504  | 6.34949E-06 | 0.001547497 |
| 243.759999 | 196.906836  | 4.44391E-06 | 0.001083248 |
| 243.799999 | 189.7567    | 4.28254E-06 | 0.001044084 |
| 243.839999 | 262.385453  | 5.92167E-06 | 0.001443941 |

|            |             |             |             |
|------------|-------------|-------------|-------------|
| 243.879999 | 518.465982  | 1.17011E-05 | 0.002853653 |
| 243.919999 | 1211.724906 | 2.73469E-05 | 0.006670466 |
| 243.959999 | 2702.597898 | 6.09939E-05 | 0.014880065 |
| 243.999999 | 5156.88127  | 0.000116384 | 0.028397605 |
| 244.039999 | 8033.085414 | 0.000181296 | 0.044243366 |
| 244.079999 | 10178.28802 | 0.00022971  | 0.056067564 |
| 244.119999 | 10446.59896 | 0.000235765 | 0.057554997 |
| 244.159999 | 8827.382427 | 0.000199222 | 0.048641976 |
| 244.199999 | 6258.897971 | 0.000141255 | 0.034494375 |
| 244.239999 | 3807.798346 | 8.59367E-05 | 0.020989181 |
| 244.279999 | 2078.98704  | 4.69198E-05 | 0.011461579 |
| 244.319999 | 1076.286208 | 2.42903E-05 | 0.005934601 |
| 244.359999 | 601.345568  | 1.35715E-05 | 0.00331634  |
| 244.399999 | 424.007411  | 9.56926E-06 | 0.002338726 |
| 244.439999 | 382.714852  | 8.63734E-06 | 0.002111312 |
| 244.479999 | 423.565369  | 9.55928E-06 | 0.002337053 |
| 244.519999 | 543.488281  | 1.22658E-05 | 0.002999227 |
| 244.559999 | 633.386013  | 1.42946E-05 | 0.003495897 |
| 244.599999 | 630.85746   | 1.42376E-05 | 0.003482511 |
| 244.639999 | 528.388924  | 1.1925E-05  | 0.002917332 |
| 244.679999 | 405.003422  | 9.14036E-06 | 0.002236464 |
| 244.719999 | 316.743264  | 7.14845E-06 | 0.00174937  |
| 244.759999 | 332.163954  | 7.49648E-06 | 0.001834838 |
| 244.799999 | 572.367133  | 1.29175E-05 | 0.003162211 |
| 244.839999 | 1222.185878 | 2.7583E-05  | 0.00675343  |
| 244.879999 | 2517.659466 | 5.68201E-05 | 0.013914098 |
| 244.919999 | 4688.902279 | 0.000105822 | 0.025917923 |
| 244.959999 | 7853.850918 | 0.00017725  | 0.043419276 |
| 244.999999 | 11770.00227 | 0.000265633 | 0.065079976 |
| 245.039999 | 15547.36633 | 0.000350882 | 0.085980224 |
| 245.079999 | 17788.26566 | 0.000401456 | 0.098388929 |
| 245.119999 | 17455.62636 | 0.000393949 | 0.096564821 |
| 245.159999 | 14620.922   | 0.000329974 | 0.080896387 |
| 245.199999 | 10546.15514 | 0.000238012 | 0.05836055  |
| 245.239999 | 6569.027177 | 0.000148254 | 0.03635776  |
| 245.279999 | 3588.876628 | 8.09959E-05 | 0.019866686 |
| 245.319999 | 1752.695858 | 3.95559E-05 | 0.009703854 |
| 245.359999 | 833.076315  | 1.88014E-05 | 0.004613105 |
| 245.399999 | 487.099718  | 1.09932E-05 | 0.002697722 |
| 245.439999 | 404.713528  | 9.13382E-06 | 0.002241805 |
| 245.479999 | 435.03146   | 9.81805E-06 | 0.002410136 |
| 245.519999 | 509.902803  | 1.15078E-05 | 0.002825394 |
| 245.559999 | 538.938061  | 1.21631E-05 | 0.002986766 |
| 245.599999 | 498.255072  | 1.12449E-05 | 0.002761753 |
| 245.639999 | 401.209112  | 9.05473E-06 | 0.002224204 |
| 245.679999 | 293.825637  | 6.63124E-06 | 0.001629162 |

|            |             |             |             |
|------------|-------------|-------------|-------------|
| 245.719999 | 214.098112  | 4.8319E-06  | 0.001187294 |
| 245.759999 | 180.832191  | 4.08113E-06 | 0.001002979 |
| 245.799999 | 205.275335  | 4.63278E-06 | 0.001138737 |
| 245.839999 | 325.428186  | 7.34446E-06 | 0.001805562 |
| 245.879999 | 654.710092  | 1.47759E-05 | 0.003633097 |
| 245.919999 | 1424.640457 | 3.21522E-05 | 0.007906857 |
| 245.959999 | 2906.733727 | 6.56009E-05 | 0.016135205 |
| 245.999999 | 5206.468911 | 0.000117503 | 0.028905677 |
| 246.039999 | 7832.498561 | 0.000176769 | 0.043492142 |
| 246.079999 | 9698.919226 | 0.000218891 | 0.053864721 |
| 246.119999 | 9982.694583 | 0.000225296 | 0.055449731 |
| 246.159999 | 8588.743923 | 0.000193836 | 0.047714666 |
| 246.199999 | 6225.305229 | 0.000140496 | 0.03459023  |
| 246.239999 | 3854.5379   | 8.69916E-05 | 0.0214208   |
| 246.279999 | 2084.205332 | 4.70376E-05 | 0.011584423 |
| 246.319999 | 1067.038523 | 2.40816E-05 | 0.005931773 |
| 246.359999 | 586.708077  | 1.32412E-05 | 0.003262098 |
| 246.399999 | 400.397916  | 9.03642E-06 | 0.002226575 |
| 246.439999 | 364.10433   | 8.21733E-06 | 0.002025078 |
| 246.479999 | 415.431165  | 9.3757E-06  | 0.002310923 |
| 246.519999 | 507.865195  | 1.14618E-05 | 0.002825565 |
| 246.559999 | 586.651768  | 1.32399E-05 | 0.003264433 |
| 246.599999 | 569.938898  | 1.28627E-05 | 0.003171948 |
| 246.639999 | 473.160542  | 1.06786E-05 | 0.002633764 |
| 246.679999 | 351.941141  | 7.94282E-06 | 0.001959335 |
| 246.719999 | 255.235936  | 5.76032E-06 | 0.001421186 |
| 246.759999 | 235.797105  | 5.32161E-06 | 0.001313161 |
| 246.799999 | 312.302896  | 7.04824E-06 | 0.001739506 |
| 246.839999 | 567.534761  | 1.28085E-05 | 0.003161642 |
| 246.879999 | 1268.236933 | 2.86223E-05 | 0.007066284 |
| 246.919999 | 2901.860677 | 6.5491E-05  | 0.016171026 |
| 246.959999 | 5936.574858 | 0.00013398  | 0.033087756 |
| 246.999999 | 10334.43946 | 0.000233234 | 0.057608774 |
| 247.039999 | 14911.82958 | 0.000336539 | 0.083138649 |
| 247.079999 | 17700.86132 | 0.000399484 | 0.098704453 |
| 247.119999 | 17308.03673 | 0.000390618 | 0.096529589 |
| 247.159999 | 14108.43571 | 0.000318408 | 0.078697657 |
| 247.199999 | 9717.292221 | 0.000219306 | 0.054212381 |
| 247.239999 | 5731.591565 | 0.000129354 | 0.031981492 |
| 247.279999 | 2960.398925 | 6.68121E-05 | 0.016521291 |
| 247.319999 | 1389.839792 | 3.13667E-05 | 0.007757624 |
| 247.359999 | 677.443431  | 1.5289E-05  | 0.003781876 |
| 247.399999 | 437.051861  | 9.86365E-06 | 0.002440267 |
| 247.439999 | 362.126521  | 8.17269E-06 | 0.002022251 |
| 247.479999 | 379.447417  | 8.5636E-06  | 0.00211932  |
| 247.519999 | 480.914235  | 1.08536E-05 | 0.002686474 |

|            |             |             |             |
|------------|-------------|-------------|-------------|
| 247.559999 | 555.239208  | 1.2531E-05  | 0.003102168 |
| 247.599999 | 532.91443   | 1.20271E-05 | 0.002977919 |
| 247.639999 | 432.866325  | 9.76919E-06 | 0.002419242 |
| 247.679999 | 309.397519  | 6.98267E-06 | 0.001729468 |
| 247.719999 | 216.970816  | 4.89673E-06 | 0.001213018 |
| 247.759999 | 173.620933  | 3.91838E-06 | 0.000970818 |
| 247.799999 | 191.285246  | 4.31704E-06 | 0.001069763 |
| 247.839999 | 303.675772  | 6.85354E-06 | 0.001698581 |
| 247.879999 | 622.499932  | 1.4049E-05  | 0.003482455 |
| 247.919999 | 1426.601008 | 3.21964E-05 | 0.007982131 |
| 247.959999 | 3080.246221 | 6.95169E-05 | 0.017237402 |
| 247.999999 | 5741.329491 | 0.000129574 | 0.032134305 |
| 248.039999 | 8838.040884 | 0.000199462 | 0.049474622 |
| 248.079999 | 11098.9803  | 0.000250489 | 0.062141193 |
| 248.119999 | 11450.43916 | 0.00025842  | 0.064119285 |
| 248.159999 | 9771.303673 | 0.000220525 | 0.054725413 |
| 248.199999 | 6948.886009 | 0.000156827 | 0.038924381 |
| 248.239999 | 4211.507541 | 9.50479E-05 | 0.02359468  |
| 248.279999 | 2256.81319  | 5.09331E-05 | 0.012645678 |
| 248.319999 | 1137.303415 | 2.56674E-05 | 0.006373717 |
| 248.359999 | 620.217376  | 1.39974E-05 | 0.003476405 |
| 248.399999 | 436.512849  | 9.85149E-06 | 0.002447109 |
| 248.439999 | 416.723863  | 9.40488E-06 | 0.002336548 |
| 248.479999 | 460.51737   | 1.03932E-05 | 0.002582511 |
| 248.519999 | 534.31694   | 1.20588E-05 | 0.00299685  |
| 248.559999 | 628.969186  | 1.4195E-05  | 0.003528299 |
| 248.599999 | 626.147149  | 1.41313E-05 | 0.003513033 |
| 248.639999 | 497.961452  | 1.12383E-05 | 0.00279429  |
| 248.679999 | 346.634415  | 7.82306E-06 | 0.001945438 |
| 248.719999 | 241.804918  | 5.4572E-06  | 0.001357315 |
| 248.759999 | 202.953194  | 4.58037E-06 | 0.001139413 |
| 248.799999 | 229.46476   | 5.1787E-06  | 0.001288461 |
| 248.839999 | 378.7172    | 8.54712E-06 | 0.002126865 |
| 248.879999 | 851.717439  | 1.92221E-05 | 0.00478399  |
| 248.919999 | 2043.593401 | 4.61211E-05 | 0.011480453 |
| 248.959999 | 4519.648827 | 0.000102002 | 0.025394462 |
| 248.999999 | 8640.493941 | 0.000195004 | 0.048555974 |
| 249.039999 | 13372.24241 | 0.000301793 | 0.0751585   |
| 249.079999 | 16814.29895 | 0.000379475 | 0.094519709 |
| 249.119999 | 17463.19357 | 0.00039412  | 0.098183163 |
| 249.159999 | 15143.15072 | 0.00034176  | 0.085152876 |
| 249.199999 | 11072.86031 | 0.000249899 | 0.062274839 |
| 249.239999 | 6829.955861 | 0.000154143 | 0.038418499 |
| 249.279999 | 3603.180854 | 8.13188E-05 | 0.020271144 |
| 249.319999 | 1692.316242 | 3.81932E-05 | 0.009522334 |
| 249.359999 | 796.211228  | 1.79694E-05 | 0.004480844 |

|            |             |             |             |
|------------|-------------|-------------|-------------|
| 249.399999 | 491.778185  | 1.10987E-05 | 0.002768028 |
| 249.439999 | 424.726734  | 9.58549E-06 | 0.002391005 |
| 249.479999 | 489.077363  | 1.10378E-05 | 0.002753709 |
| 249.519999 | 607.299226  | 1.37059E-05 | 0.003419896 |
| 249.559999 | 684.610767  | 1.54507E-05 | 0.00385588  |
| 249.599999 | 645.629745  | 1.4571E-05  | 0.003636913 |
| 249.639999 | 497.72584   | 1.1233E-05  | 0.002804201 |
| 249.679999 | 335.131777  | 7.56346E-06 | 0.001888444 |
| 249.719999 | 235.059263  | 5.30496E-06 | 0.001324755 |
| 249.759999 | 208.515224  | 4.7059E-06  | 0.001175345 |
| 249.799999 | 242.032557  | 5.46234E-06 | 0.001364492 |
| 249.839999 | 349.246758  | 7.88201E-06 | 0.001969242 |
| 249.879999 | 642.749395  | 1.4506E-05  | 0.003624749 |
| 249.919999 | 1370.338332 | 3.09266E-05 | 0.007729183 |
| 249.959999 | 2821.729021 | 6.36825E-05 | 0.015918076 |
| 249.999999 | 5175.476459 | 0.000116803 | 0.029200824 |
| 250.039999 | 8045.190392 | 0.000181569 | 0.045399448 |
| 250.079999 | 10217.8104  | 0.000230602 | 0.057668885 |
| 250.119999 | 10638.03331 | 0.000240086 | 0.060050209 |
| 250.159999 | 9208.546562 | 0.000207824 | 0.051989269 |
| 250.199999 | 6599.164838 | 0.000148934 | 0.037263276 |
| 250.239999 | 3994.953326 | 9.01605E-05 | 0.022561771 |
| 250.279999 | 2136.769598 | 4.82239E-05 | 0.012069481 |
| 250.319999 | 1076.180213 | 2.42879E-05 | 0.006079744 |
| 250.359999 | 601.865943  | 1.35833E-05 | 0.003400709 |
| 250.399999 | 446.870076  | 1.00852E-05 | 0.002525343 |
| 250.439999 | 445.768911  | 1.00604E-05 | 0.002519522 |
| 250.479999 | 522.68014   | 1.17962E-05 | 0.002954703 |
| 250.519999 | 634.399255  | 1.43175E-05 | 0.003586822 |
| 250.559999 | 666.03899   | 1.50316E-05 | 0.003766311 |
| 250.599999 | 582.368941  | 1.31433E-05 | 0.0032937   |
| 250.639999 | 456.606292  | 1.0305E-05  | 0.002582837 |
| 250.679999 | 331.846204  | 7.48931E-06 | 0.001877419 |
| 250.719999 | 251.287131  | 5.6712E-06  | 0.001421883 |
| 250.759999 | 220.202533  | 4.96966E-06 | 0.001246193 |
| 250.799999 | 260.659021  | 5.88271E-06 | 0.001475384 |
| 250.839999 | 438.51221   | 9.89661E-06 | 0.002482466 |
| 250.879999 | 941.647871  | 2.12517E-05 | 0.005331622 |
| 250.919999 | 2162.973112 | 4.88153E-05 | 0.012248733 |
| 250.959999 | 4684.296079 | 0.000105718 | 0.026530999 |
| 250.999999 | 8757.224962 | 0.000197638 | 0.049607231 |
| 251.039999 | 13712.67447 | 0.000309476 | 0.077690845 |
| 251.079999 | 17496.98639 | 0.000394883 | 0.099147126 |
| 251.119999 | 18300.31105 | 0.000413013 | 0.103715706 |
| 251.159999 | 15968.9261  | 0.000360396 | 0.090517164 |
| 251.199999 | 11732.73012 | 0.000264791 | 0.066515594 |



|            |             |             |             |
|------------|-------------|-------------|-------------|
| 251.239999 | 7303.003345 | 0.000164819 | 0.041409028 |
| 251.279999 | 3903.444742 | 8.80953E-05 | 0.02213659  |
| 251.319999 | 1865.166537 | 4.20942E-05 | 0.010579117 |
| 251.359999 | 877.556714  | 1.98052E-05 | 0.004978243 |
| 251.399999 | 504.054838  | 1.13758E-05 | 0.00285988  |
| 251.439999 | 427.257775  | 9.64261E-06 | 0.002424539 |
| 251.479999 | 494.259063  | 1.11547E-05 | 0.002805194 |
| 251.519999 | 642.086795  | 1.4491E-05  | 0.003644777 |
| 251.559999 | 751.864413  | 1.69685E-05 | 0.004268604 |
| 251.599999 | 731.404576  | 1.65068E-05 | 0.004153106 |
| 251.639999 | 585.012467  | 1.32029E-05 | 0.003322382 |
| 251.679999 | 403.768294  | 9.11249E-06 | 0.002293431 |
| 251.719999 | 284.716967  | 6.42567E-06 | 0.001617468 |
| 251.759999 | 229.144977  | 5.17148E-06 | 0.001301973 |
| 251.799999 | 224.601919  | 5.06895E-06 | 0.001276362 |
| 251.839999 | 328.553133  | 7.41499E-06 | 0.00186739  |
| 251.879999 | 645.262318  | 1.45627E-05 | 0.003668046 |
| 251.919999 | 1379.69097  | 3.11377E-05 | 0.00784421  |
| 251.959999 | 2994.131844 | 6.75734E-05 | 0.01702579  |
| 251.999999 | 5731.535319 | 0.000129353 | 0.032596898 |
| 252.039999 | 9124.233041 | 0.000205921 | 0.051900387 |
| 252.079999 | 11862.49052 | 0.00026772  | 0.067486829 |
| 252.119999 | 12535.76001 | 0.000282915 | 0.071328439 |
| 252.159999 | 10847.93715 | 0.000244823 | 0.061734525 |
| 252.199999 | 7803.579563 | 0.000176116 | 0.044416435 |
| 252.239999 | 4749.402145 | 0.000107187 | 0.027036947 |
| 252.279999 | 2528.071884 | 5.70551E-05 | 0.014393851 |
| 252.319999 | 1242.475237 | 2.80409E-05 | 0.007075289 |
| 252.359999 | 650.28865   | 1.46761E-05 | 0.003703663 |
| 252.399999 | 450.911979  | 1.01765E-05 | 0.002568537 |
| 252.439999 | 409.357358  | 9.23863E-06 | 0.002332199 |
| 252.479999 | 431.10544   | 9.72945E-06 | 0.002456491 |
| 252.519999 | 520.108589  | 1.17381E-05 | 0.002964112 |
| 252.559999 | 605.304161  | 1.36609E-05 | 0.00345019  |
| 252.599999 | 589.198137  | 1.32974E-05 | 0.003358918 |
| 252.639999 | 486.324362  | 1.09757E-05 | 0.002772892 |
| 252.679999 | 343.613769  | 7.75488E-06 | 0.001959504 |
| 252.719999 | 232.518784  | 5.24763E-06 | 0.00132618  |
| 252.759999 | 193.593914  | 4.36914E-06 | 0.001104345 |
| 252.799999 | 226.494278  | 5.11166E-06 | 0.001292228 |
| 252.839999 | 388.991696  | 8.779E-06   | 0.002219683 |
| 252.879999 | 815.856557  | 1.84127E-05 | 0.004656215 |
| 252.919999 | 1839.039709 | 4.15046E-05 | 0.010497334 |
| 252.959999 | 3914.064406 | 8.8335E-05  | 0.022345217 |
| 252.999999 | 7339.716508 | 0.000165647 | 0.041908736 |
| 253.039999 | 11550.00598 | 0.000260668 | 0.065959316 |

|            |             |             |             |
|------------|-------------|-------------|-------------|
| 253.079999 | 14944.28426 | 0.000337272 | 0.085356716 |
| 253.119999 | 16150.11879 | 0.000364486 | 0.092258616 |
| 253.159999 | 14501.28098 | 0.000327274 | 0.082852613 |
| 253.199999 | 10928.23358 | 0.000246635 | 0.062447984 |
| 253.239999 | 7061.404773 | 0.000159366 | 0.040357863 |
| 253.279999 | 3963.686849 | 8.94549E-05 | 0.022657135 |
| 253.319999 | 1969.48313  | 4.44485E-05 | 0.011259692 |
| 253.359999 | 938.438253  | 2.11792E-05 | 0.005365973 |
| 253.399999 | 521.095875  | 1.17604E-05 | 0.002980087 |
| 253.439999 | 400.481404  | 9.03831E-06 | 0.002290669 |
| 253.479999 | 403.836721  | 9.11403E-06 | 0.002310225 |
| 253.519999 | 481.733162  | 1.0872E-05  | 0.002756281 |
| 253.559999 | 554.962398  | 1.25247E-05 | 0.00317577  |
| 253.599999 | 537.701777  | 1.21352E-05 | 0.003077482 |
| 253.639999 | 431.942865  | 9.74835E-06 | 0.002472571 |
| 253.679999 | 303.85277   | 6.85753E-06 | 0.001739619 |
| 253.719999 | 213.685806  | 4.82259E-06 | 0.001223588 |
| 253.759999 | 175.694455  | 3.96518E-06 | 0.001006204 |
| 253.799999 | 203.647975  | 4.59605E-06 | 0.001166478 |
| 253.839999 | 319.654268  | 7.21415E-06 | 0.00183124  |
| 253.879999 | 605.638747  | 1.36684E-05 | 0.003470139 |
| 253.919999 | 1308.696471 | 2.95355E-05 | 0.007499643 |
| 253.959999 | 2674.944051 | 6.03698E-05 | 0.015331505 |
| 253.999999 | 4824.588811 | 0.000108884 | 0.027656599 |
| 254.039999 | 7451.600073 | 0.000168172 | 0.042722474 |
| 254.079999 | 9616.292845 | 0.000217026 | 0.055142051 |
| 254.119999 | 10099.82866 | 0.000227939 | 0.057923875 |
| 254.159999 | 8726.086692 | 0.000196936 | 0.050053158 |
| 254.199999 | 6388.193039 | 0.000144173 | 0.03664868  |
| 254.239999 | 3981.942998 | 8.98669E-05 | 0.022847762 |
| 254.279999 | 2138.01228  | 4.8252E-05  | 0.012269508 |
| 254.319999 | 1065.593676 | 2.4049E-05  | 0.006116133 |
| 254.359999 | 559.935641  | 1.2637E-05  | 0.003214339 |
| 254.399999 | 367.080079  | 8.28449E-06 | 0.002107573 |
| 254.439999 | 337.64537   | 7.62019E-06 | 0.00193888  |
| 254.479999 | 397.249129  | 8.96536E-06 | 0.002281505 |
| 254.519999 | 502.929399  | 1.13504E-05 | 0.002888908 |
| 254.559999 | 561.400511  | 1.267E-05   | 0.003225282 |
| 254.599999 | 532.62119   | 1.20205E-05 | 0.003060424 |
| 254.639999 | 456.691568  | 1.03069E-05 | 0.002624547 |
| 254.679999 | 350.203052  | 7.9036E-06  | 0.002012888 |
| 254.719999 | 257.375237  | 5.8086E-06  | 0.001479567 |
| 254.759999 | 224.964091  | 5.07713E-06 | 0.001293449 |
| 254.799999 | 267.091938  | 6.02789E-06 | 0.001535907 |
| 254.839999 | 429.380402  | 9.69052E-06 | 0.002469531 |
| 254.879999 | 849.387136  | 1.91695E-05 | 0.004885918 |

|            |             |             |             |
|------------|-------------|-------------|-------------|
| 254.919999 | 1881.668896 | 4.24666E-05 | 0.010825597 |
| 254.959999 | 3940.776588 | 8.89378E-05 | 0.022675591 |
| 254.999999 | 7170.524744 | 0.000161829 | 0.041266333 |
| 255.039999 | 10941.04614 | 0.000246924 | 0.062975541 |
| 255.079999 | 14012.89455 | 0.000316252 | 0.080669435 |
| 255.119999 | 15062.95044 | 0.00033995  | 0.086727995 |
| 255.159999 | 13743.69368 | 0.000310176 | 0.079144514 |
| 255.199999 | 10862.88665 | 0.00024516  | 0.062564888 |
| 255.239999 | 7467.893551 | 0.00016854  | 0.043018138 |
| 255.279999 | 4478.405305 | 0.000101071 | 0.025801499 |
| 255.319999 | 2380.07796  | 5.3715E-05  | 0.013714525 |
| 255.359999 | 1197.825606 | 2.70333E-05 | 0.006903212 |
| 255.399999 | 645.468526  | 1.45673E-05 | 0.003720495 |
| 255.439999 | 454.344888  | 1.02539E-05 | 0.002619264 |
| 255.479999 | 432.103108  | 9.75197E-06 | 0.002491432 |
| 255.519999 | 495.417446  | 1.11809E-05 | 0.002856939 |
| 255.559999 | 550.684151  | 1.24282E-05 | 0.003176144 |
| 255.599999 | 572.486872  | 1.29202E-05 | 0.003302411 |
| 255.639999 | 513.099287  | 1.15799E-05 | 0.002960295 |
| 255.679999 | 384.566363  | 8.67913E-06 | 0.002219079 |
| 255.719999 | 295.064052  | 6.65918E-06 | 0.001702887 |
| 255.759999 | 287.065301  | 6.47866E-06 | 0.001656983 |
| 255.799999 | 371.712082  | 8.38902E-06 | 0.002145912 |
| 255.839999 | 568.157999  | 1.28225E-05 | 0.003280517 |
| 255.879999 | 931.706435  | 2.10273E-05 | 0.00538047  |
| 255.919999 | 1661.675976 | 3.75017E-05 | 0.009597438 |
| 255.959999 | 3004.384996 | 6.78048E-05 | 0.017355313 |
| 255.999999 | 5141.869568 | 0.000116045 | 0.029707477 |
| 256.039999 | 7896.99499  | 0.000178224 | 0.045632518 |
| 256.079999 | 10564.73121 | 0.000238431 | 0.061057479 |
| 256.119999 | 12883.32268 | 0.000290759 | 0.074469105 |
| 256.159999 | 15263.62763 | 0.000344479 | 0.088241693 |
| 256.199999 | 17796.22326 | 0.000401636 | 0.102899135 |
| 256.239999 | 19527.2931  | 0.000440704 | 0.112925943 |
| 256.279999 | 19118.9402  | 0.000431488 | 0.110581706 |
| 256.319999 | 16017.60257 | 0.000361495 | 0.092658393 |
| 256.359999 | 11271.75717 | 0.000254388 | 0.065214871 |
| 256.399999 | 6764.60354  | 0.000152668 | 0.039143993 |
| 256.439999 | 3566.080739 | 8.04815E-05 | 0.020638669 |
| 256.479999 | 1815.143646 | 4.09653E-05 | 0.010506771 |
| 256.519999 | 1102.868467 | 2.48902E-05 | 0.006384835 |
| 256.559999 | 880.930246  | 1.98814E-05 | 0.005100764 |
| 256.599999 | 753.235799  | 1.69995E-05 | 0.004362067 |
| 256.639999 | 578.40677   | 1.30538E-05 | 0.003350136 |
| 256.679999 | 396.698792  | 8.95294E-06 | 0.00229804  |
| 256.719999 | 265.89053   | 6.00078E-06 | 0.00154052  |

|            |             |             |             |
|------------|-------------|-------------|-------------|
| 256.759999 | 206.339393  | 4.65679E-06 | 0.001195678 |
| 256.799999 | 249.469617  | 5.63018E-06 | 0.001445831 |
| 256.839999 | 433.223636  | 9.77725E-06 | 0.00251119  |
| 256.879999 | 914.504566  | 2.06391E-05 | 0.005301771 |
| 256.919999 | 1994.143092 | 4.5005E-05  | 0.011562693 |
| 256.959999 | 4127.635919 | 9.3155E-05  | 0.023937107 |
| 256.999999 | 7462.446647 | 0.000168417 | 0.043283176 |
| 257.039999 | 11096.55411 | 0.000250434 | 0.064371496 |
| 257.079999 | 13607.04043 | 0.000307092 | 0.078947198 |
| 257.119999 | 14180.60722 | 0.000320037 | 0.082287798 |
| 257.159999 | 12881.62477 | 0.00029072  | 0.074761639 |
| 257.199999 | 10634.61085 | 0.000240008 | 0.061730148 |
| 257.239999 | 8361.645941 | 0.000188711 | 0.048543941 |
| 257.279999 | 6249.510756 | 0.000141043 | 0.036287479 |
| 257.319999 | 4338.925244 | 9.79235E-05 | 0.025197675 |
| 257.359999 | 2739.426355 | 6.1825E-05  | 0.015911291 |
| 257.399999 | 1607.627569 | 3.62819E-05 | 0.009338965 |
| 257.439999 | 963.896486  | 2.17538E-05 | 0.005600299 |
| 257.479999 | 691.236578  | 1.56002E-05 | 0.004016752 |
| 257.519999 | 644.317874  | 1.45414E-05 | 0.00374469  |
| 257.559999 | 707.20714   | 1.59607E-05 | 0.004110833 |
| 257.599999 | 681.995601  | 1.53917E-05 | 0.0039649   |
| 257.639999 | 556.484434  | 1.25591E-05 | 0.003235721 |
| 257.679999 | 433.141516  | 9.7754E-06  | 0.002518925 |
| 257.719999 | 407.683303  | 9.20084E-06 | 0.002371242 |
| 257.759999 | 633.754192  | 1.43029E-05 | 0.003686728 |
| 257.799999 | 1385.60989  | 3.12713E-05 | 0.008061737 |
| 257.839999 | 2957.443001 | 6.67454E-05 | 0.017209626 |
| 257.879999 | 5372.942929 | 0.00012126  | 0.031270487 |
| 257.919999 | 8062.868355 | 0.000181968 | 0.046933111 |
| 257.959999 | 10365.80509 | 0.000233942 | 0.060347622 |
| 257.999999 | 11889.76506 | 0.000268335 | 0.069230542 |
| 258.039999 | 12653.79896 | 0.000285579 | 0.073690706 |
| 258.079999 | 12609.9277  | 0.000284589 | 0.073446601 |
| 258.119999 | 11400.12472 | 0.000257285 | 0.066410387 |
| 258.159999 | 9141.671604 | 0.000206315 | 0.053262227 |
| 258.199999 | 6434.887668 | 0.000145226 | 0.03749747  |
| 258.239999 | 3999.739868 | 9.02686E-05 | 0.023310952 |
| 258.279999 | 2241.751999 | 5.05932E-05 | 0.013067217 |
| 258.319999 | 1206.628021 | 2.72319E-05 | 0.007034548 |
| 258.359999 | 698.790417  | 1.57707E-05 | 0.004074525 |
| 258.399999 | 468.852251  | 1.05813E-05 | 0.002734219 |
| 258.439999 | 386.090942  | 8.71353E-06 | 0.002251926 |
| 258.479999 | 451.478083  | 1.01892E-05 | 0.002633713 |
| 258.519999 | 615.078051  | 1.38815E-05 | 0.003588634 |
| 258.559999 | 734.111013  | 1.65679E-05 | 0.004283787 |

|            |             |             |             |
|------------|-------------|-------------|-------------|
| 258.599999 | 704.470128  | 1.58989E-05 | 0.004111458 |
| 258.639999 | 550.593867  | 1.24261E-05 | 0.003213896 |
| 258.679999 | 378.889185  | 8.551E-06   | 0.002211973 |
| 258.719999 | 281.002743  | 6.34184E-06 | 0.001640761 |
| 258.759999 | 280.731351  | 6.33572E-06 | 0.00163943  |
| 258.799999 | 407.755529  | 9.20247E-06 | 0.0023816   |
| 258.839999 | 767.435298  | 1.73199E-05 | 0.004483095 |
| 258.879999 | 1587.048211 | 3.58175E-05 | 0.009272426 |
| 258.919999 | 3228.955181 | 7.2873E-05  | 0.018868282 |
| 258.959999 | 6039.637345 | 0.000136306 | 0.035297854 |
| 258.999999 | 9938.392165 | 0.000224296 | 0.058092578 |
| 259.039999 | 14027.09223 | 0.000316572 | 0.082004793 |
| 259.079999 | 16454.36803 | 0.000371352 | 0.096209919 |
| 259.119999 | 16051.9406  | 0.00036227  | 0.093871387 |
| 259.159999 | 13167.02912 | 0.000297162 | 0.077012376 |
| 259.199999 | 9231.700207 | 0.000208347 | 0.054003442 |
| 259.239999 | 5610.871439 | 0.00012663  | 0.032827445 |
| 259.279999 | 3021.816456 | 6.81982E-05 | 0.017682426 |
| 259.319999 | 1493.735628 | 3.37115E-05 | 0.008742075 |
| 259.359999 | 744.629715  | 1.68053E-05 | 0.004358611 |
| 259.399999 | 439.973166  | 9.92958E-06 | 0.002575733 |
| 259.439999 | 354.346685  | 7.99711E-06 | 0.002074771 |
| 259.479999 | 405.936422  | 9.16142E-06 | 0.002377205 |
| 259.519999 | 499.760649  | 1.12789E-05 | 0.002927101 |
| 259.559999 | 561.702942  | 1.26769E-05 | 0.003290404 |
| 259.599999 | 542.093408  | 1.22343E-05 | 0.003176022 |
| 259.639999 | 494.738525  | 1.11656E-05 | 0.002899026 |
| 259.679999 | 419.923145  | 9.47708E-06 | 0.002461008 |
| 259.719999 | 339.762167  | 7.66796E-06 | 0.001991522 |
| 259.759999 | 322.679646  | 7.28243E-06 | 0.001891684 |
| 259.799999 | 433.151604  | 9.77563E-06 | 0.002539708 |
| 259.839999 | 759.697276  | 1.71453E-05 | 0.004455037 |
| 259.879999 | 1382.029954 | 3.11905E-05 | 0.008105785 |
| 259.919999 | 2363.733957 | 5.33462E-05 | 0.01386574  |
| 259.959999 | 3901.127654 | 8.8043E-05  | 0.022887663 |
| 259.999999 | 6018.792157 | 0.000135836 | 0.035317296 |
| 260.039999 | 8268.397559 | 0.000186606 | 0.04852508  |
| 260.079999 | 9816.049308 | 0.000221535 | 0.057616708 |
| 260.119999 | 9860.534384 | 0.000222539 | 0.057886721 |
| 260.159999 | 8348.191904 | 0.000188407 | 0.049015981 |
| 260.199999 | 5982.919056 | 0.000135026 | 0.035133804 |
| 260.239999 | 3691.576161 | 8.33137E-05 | 0.021681566 |
| 260.279999 | 2016.208492 | 4.5503E-05  | 0.011843525 |
| 260.319999 | 1018.404301 | 2.2984E-05  | 0.005983186 |
| 260.359999 | 529.484426  | 1.19497E-05 | 0.003111231 |
| 260.399999 | 360.738039  | 8.14136E-06 | 0.002120009 |

|            |             |             |             |
|------------|-------------|-------------|-------------|
| 260.439999 | 342.927057  | 7.73939E-06 | 0.002015646 |
| 260.479999 | 400.646485  | 9.04203E-06 | 0.002355269 |
| 260.519999 | 473.003048  | 1.0675E-05  | 0.002781056 |
| 260.559999 | 517.864906  | 1.16875E-05 | 0.003045292 |
| 260.599999 | 514.321377  | 1.16075E-05 | 0.003024919 |
| 260.639999 | 431.870918  | 9.74673E-06 | 0.002540386 |
| 260.679999 | 342.655849  | 7.73327E-06 | 0.002015908 |
| 260.719999 | 257.710687  | 5.81617E-06 | 0.001516392 |
| 260.759999 | 223.235262  | 5.03811E-06 | 0.001313737 |
| 260.799999 | 284.264174  | 6.41545E-06 | 0.001673148 |
| 260.839999 | 484.647582  | 1.09378E-05 | 0.002853021 |
| 260.879999 | 1034.739646 | 2.33526E-05 | 0.006092235 |
| 260.919999 | 2343.435074 | 5.28881E-05 | 0.013799554 |
| 260.959999 | 5075.947192 | 0.000114557 | 0.02989481  |
| 260.999999 | 9401.71913  | 0.000212184 | 0.055379947 |
| 261.039999 | 14132.50383 | 0.000318951 | 0.08325895  |
| 261.079999 | 17299.28416 | 0.000390421 | 0.101931048 |
| 261.119999 | 17324.03687 | 0.000390979 | 0.102092536 |
| 261.159999 | 14361.6513  | 0.000324122 | 0.084647823 |
| 261.199999 | 10113.4693  | 0.000228247 | 0.059618094 |
| 261.239999 | 6184.521986 | 0.000139576 | 0.036462846 |
| 261.279999 | 3323.65587  | 7.50103E-05 | 0.019598687 |
| 261.319999 | 1586.314344 | 3.58009E-05 | 0.009355493 |
| 261.359999 | 757.386875  | 1.70932E-05 | 0.00446747  |
| 261.399999 | 459.778044  | 1.03766E-05 | 0.00271243  |
| 261.439999 | 392.20923   | 8.85162E-06 | 0.002314166 |
| 261.479999 | 395.577536  | 8.92763E-06 | 0.002334398 |
| 261.519999 | 451.645357  | 1.0193E-05  | 0.002665675 |
| 261.559999 | 534.37719   | 1.20601E-05 | 0.003154453 |
| 261.599999 | 519.668886  | 1.17282E-05 | 0.003068098 |
| 261.639999 | 427.436654  | 9.64665E-06 | 0.002523949 |
| 261.679999 | 314.903531  | 7.10693E-06 | 0.001859743 |
| 261.719999 | 235.834438  | 5.32245E-06 | 0.001392993 |
| 261.759999 | 208.454253  | 4.70452E-06 | 0.001231456 |
| 261.799999 | 240.814408  | 5.43485E-06 | 0.001422843 |
| 261.839999 | 333.406759  | 7.52453E-06 | 0.001970222 |
| 261.879999 | 582.712922  | 1.3151E-05  | 0.003443989 |
| 261.919999 | 1176.768502 | 2.6558E-05  | 0.006956078 |
| 261.959999 | 2352.904774 | 5.31018E-05 | 0.013910543 |
| 261.999999 | 4376.431256 | 9.877E-05   | 0.025877729 |
| 262.039999 | 7031.435845 | 0.00015869  | 0.041583052 |
| 262.079999 | 9306.665368 | 0.000210038 | 0.055046883 |
| 262.119999 | 10007.6259  | 0.000225858 | 0.059201945 |
| 262.159999 | 8920.793562 | 0.00020133  | 0.052780642 |
| 262.199999 | 6775.884847 | 0.000152922 | 0.040096222 |
| 262.239999 | 4425.979534 | 9.98882E-05 | 0.02619468  |

|            |             |             |             |
|------------|-------------|-------------|-------------|
| 262.279999 | 2498.813865 | 5.63947E-05 | 0.014791215 |
| 262.319999 | 1278.876747 | 2.88625E-05 | 0.007571202 |
| 262.359999 | 663.25274   | 1.49687E-05 | 0.003927186 |
| 262.399999 | 417.490617  | 9.42218E-06 | 0.00247238  |
| 262.439999 | 347.042163  | 7.83226E-06 | 0.002055498 |
| 262.479999 | 369.766327  | 8.34511E-06 | 0.002190425 |
| 262.519999 | 465.924767  | 1.05153E-05 | 0.002760469 |
| 262.559999 | 531.426438  | 1.19936E-05 | 0.003149028 |
| 262.599999 | 529.402094  | 1.19479E-05 | 0.00313751  |
| 262.639999 | 456.815083  | 1.03097E-05 | 0.002707734 |
| 262.679999 | 365.750615  | 8.25448E-06 | 0.002168287 |
| 262.719999 | 291.315129  | 6.57458E-06 | 0.001727273 |
| 262.759999 | 270.022937  | 6.09404E-06 | 0.00160127  |
| 262.799999 | 315.812187  | 7.12744E-06 | 0.001873092 |
| 262.839999 | 486.269724  | 1.09744E-05 | 0.002884519 |
| 262.879999 | 905.297176  | 2.04313E-05 | 0.005370979 |
| 262.919999 | 1891.492604 | 4.26884E-05 | 0.011223622 |
| 262.959999 | 3959.734478 | 8.93657E-05 | 0.023499602 |
| 262.999999 | 7232.747166 | 0.000163233 | 0.042930287 |
| 263.039999 | 11017.33164 | 0.000248646 | 0.065403799 |
| 263.079999 | 13775.90824 | 0.000310903 | 0.081792377 |
| 263.119999 | 14368.01664 | 0.000324266 | 0.085320902 |
| 263.159999 | 12596.50874 | 0.000284286 | 0.074812613 |
| 263.199999 | 9453.174103 | 0.000213345 | 0.056152397 |
| 263.239999 | 6084.416051 | 0.000137317 | 0.036147273 |
| 263.279999 | 3399.030242 | 7.67114E-05 | 0.020196572 |
| 263.319999 | 1671.27122  | 3.77183E-05 | 0.009931973 |
| 263.359999 | 788.099668  | 1.77863E-05 | 0.004684203 |
| 263.399999 | 442.420561  | 9.98482E-06 | 0.00263     |
| 263.439999 | 375.937325  | 8.48438E-06 | 0.002235126 |
| 263.479999 | 484.408933  | 1.09324E-05 | 0.002880478 |
| 263.519999 | 680.776791  | 1.53642E-05 | 0.00404877  |
| 263.559999 | 789.65659   | 1.78214E-05 | 0.004697021 |
| 263.599999 | 716.486457  | 1.61701E-05 | 0.004262439 |
| 263.639999 | 535.029516  | 1.20749E-05 | 0.003183419 |
| 263.679999 | 357.113538  | 8.05956E-06 | 0.002125143 |
| 263.719999 | 243.66562   | 5.49919E-06 | 0.001450247 |
| 263.759999 | 185.91933   | 4.19594E-06 | 0.001106721 |
| 263.799999 | 196.460827  | 4.43385E-06 | 0.001169649 |
| 263.839999 | 294.404796  | 6.64431E-06 | 0.001753034 |
| 263.879999 | 522.732531  | 1.17973E-05 | 0.003113083 |
| 263.919999 | 1082.570137 | 2.44321E-05 | 0.00644812  |
| 263.959999 | 2265.383393 | 5.11265E-05 | 0.013495363 |
| 263.999999 | 4357.169853 | 9.83353E-05 | 0.025960507 |
| 264.039999 | 6974.628843 | 0.000157408 | 0.041561918 |
| 264.079999 | 9047.485496 | 0.000204189 | 0.053922269 |

|            |             |             |             |
|------------|-------------|-------------|-------------|
| 264.119999 | 9549.932122 | 0.000215529 | 0.056925431 |
| 264.159999 | 8334.822534 | 0.000188105 | 0.049689905 |
| 264.199999 | 6139.558106 | 0.000138561 | 0.036607889 |
| 264.239999 | 3868.163234 | 8.72991E-05 | 0.023067903 |
| 264.279999 | 2132.852992 | 4.81355E-05 | 0.012721255 |
| 264.319999 | 1081.050932 | 2.43978E-05 | 0.00644883  |
| 264.359999 | 556.577391  | 1.25612E-05 | 0.003320673 |
| 264.399999 | 366.298454  | 8.26685E-06 | 0.002185754 |
| 264.439999 | 385.319176  | 8.69612E-06 | 0.002299601 |
| 264.479999 | 542.612453  | 1.2246E-05  | 0.003238824 |
| 264.519999 | 785.044239  | 1.77174E-05 | 0.004686595 |
| 264.559999 | 913.962932  | 2.06269E-05 | 0.005457045 |
| 264.599999 | 824.140762  | 1.85997E-05 | 0.004921483 |
| 264.639999 | 621.452281  | 1.40253E-05 | 0.003711659 |
| 264.679999 | 418.351555  | 9.44161E-06 | 0.002499006 |
| 264.719999 | 293.222976  | 6.61763E-06 | 0.00175182  |
| 264.759999 | 243.150491  | 5.48757E-06 | 0.001452888 |
| 264.799999 | 273.198433  | 6.16571E-06 | 0.001632679 |
| 264.839999 | 435.265538  | 9.82334E-06 | 0.002601613 |
| 264.879999 | 860.421429  | 1.94185E-05 | 0.005143576 |
| 264.919999 | 1866.752652 | 4.213E-05   | 0.011161081 |
| 264.959999 | 3920.921256 | 8.84897E-05 | 0.023446239 |
| 264.999999 | 7417.940999 | 0.000167413 | 0.044364338 |
| 265.039999 | 11901.01313 | 0.000268589 | 0.071186905 |
| 265.079999 | 15713.52017 | 0.000354632 | 0.09400592  |
| 265.119999 | 17158.15091 | 0.000387236 | 0.102663893 |
| 265.159999 | 15516.38358 | 0.000350183 | 0.092854568 |
| 265.199999 | 11802.24871 | 0.00026636  | 0.070638755 |
| 265.239999 | 7670.94035  | 0.000173122 | 0.045918996 |
| 265.279999 | 4291.244339 | 9.68474E-05 | 0.02569168  |
| 265.319999 | 2090.213599 | 4.71732E-05 | 0.012515996 |
| 265.359999 | 952.514395  | 2.14969E-05 | 0.005704424 |
| 265.399999 | 482.134187  | 1.08811E-05 | 0.002887843 |
| 265.439999 | 340.366496  | 7.6816E-06  | 0.002039003 |
| 265.479999 | 369.593779  | 8.34122E-06 | 0.002214426 |
| 265.519999 | 504.239665  | 1.138E-05   | 0.003021614 |
| 265.559999 | 649.843059  | 1.46661E-05 | 0.003894717 |
| 265.599999 | 679.570427  | 1.5337E-05  | 0.004073496 |
| 265.639999 | 575.879284  | 1.29968E-05 | 0.003452468 |
| 265.679999 | 411.855238  | 9.295E-06   | 0.002469495 |
| 265.719999 | 286.77181   | 6.47204E-06 | 0.001719751 |
| 265.759999 | 216.163582  | 4.87851E-06 | 0.001296513 |
| 265.799999 | 206.476844  | 4.65989E-06 | 0.0012386   |
| 265.839999 | 281.185499  | 6.34597E-06 | 0.001687011 |
| 265.879999 | 498.373449  | 1.12476E-05 | 0.00299051  |
| 265.919999 | 1058.085243 | 2.38795E-05 | 0.006350039 |



|            |             |             |             |
|------------|-------------|-------------|-------------|
| 265.959999 | 2352.34775  | 5.30892E-05 | 0.014119607 |
| 265.999999 | 4736.361694 | 0.000106893 | 0.028433561 |
| 266.039999 | 8049.490581 | 0.000181666 | 0.048330367 |
| 266.079999 | 11238.92434 | 0.000253647 | 0.067490358 |
| 266.119999 | 12719.77472 | 0.000287068 | 0.076394429 |
| 266.159999 | 11700.99965 | 0.000264075 | 0.070286272 |
| 266.199999 | 8889.2651   | 0.000200618 | 0.0534046   |
| 266.239999 | 5666.914958 | 0.000127894 | 0.034050599 |
| 266.279999 | 3094.989514 | 6.98496E-05 | 0.018599552 |
| 266.319999 | 1522.089108 | 3.43514E-05 | 0.009148473 |
| 266.359999 | 753.140358  | 1.69973E-05 | 0.004527408 |
| 266.399999 | 453.594982  | 1.0237E-05  | 0.002727139 |
| 266.439999 | 403.350947  | 9.10307E-06 | 0.002425422 |
| 266.479999 | 486.449134  | 1.09785E-05 | 0.002925545 |
| 266.519999 | 616.135833  | 1.39053E-05 | 0.003706048 |
| 266.559999 | 753.314517  | 1.70013E-05 | 0.004531856 |
| 266.599999 | 812.424343  | 1.83353E-05 | 0.004888187 |
| 266.639999 | 712.159675  | 1.60725E-05 | 0.004285559 |
| 266.679999 | 515.610463  | 1.16366E-05 | 0.003103251 |
| 266.719999 | 352.719615  | 7.96039E-06 | 0.002123195 |
| 266.759999 | 268.448823  | 6.05852E-06 | 0.00161617  |
| 266.799999 | 260.583284  | 5.881E-06   | 0.001569051 |
| 266.839999 | 374.914988  | 8.46131E-06 | 0.002257816 |
| 266.879999 | 767.35702   | 1.73182E-05 | 0.004621876 |
| 266.919999 | 1857.364192 | 4.19181E-05 | 0.011188785 |
| 266.959999 | 4155.786521 | 9.37903E-05 | 0.025038262 |
| 266.999999 | 7964.307601 | 0.000179743 | 0.047991469 |
| 267.039999 | 12718.63785 | 0.000287042 | 0.07665168  |
| 267.079999 | 16708.57975 | 0.000377089 | 0.100713029 |
| 267.119998 | 18293.73683 | 0.000412864 | 0.110284273 |
| 267.159998 | 16717.33557 | 0.000377287 | 0.100795988 |
| 267.199998 | 12820.57493 | 0.000289343 | 0.07731232  |
| 267.239998 | 8352.035531 | 0.000188494 | 0.050373085 |
| 267.279998 | 4670.196002 | 0.0001054   | 0.028171263 |
| 267.319998 | 2239.955442 | 5.05527E-05 | 0.013513741 |
| 267.359998 | 982.561619  | 2.2175E-05  | 0.005928721 |
| 267.399998 | 485.28925   | 1.09523E-05 | 0.002928646 |
| 267.439998 | 360.110852  | 8.1272E-06  | 0.002173538 |
| 267.479998 | 371.401138  | 8.38201E-06 | 0.002242019 |
| 267.519998 | 438.590563  | 9.89838E-06 | 0.002648014 |
| 267.559998 | 544.489116  | 1.22884E-05 | 0.003287874 |
| 267.599998 | 574.230748  | 1.29596E-05 | 0.003467986 |
| 267.639998 | 501.117682  | 1.13095E-05 | 0.003026882 |
| 267.679998 | 384.841696  | 8.68534E-06 | 0.002324892 |
| 267.719998 | 285.177476  | 6.43606E-06 | 0.001723062 |
| 267.759998 | 258.298097  | 5.82943E-06 | 0.001560888 |

|            |             |             |             |
|------------|-------------|-------------|-------------|
| 267.799998 | 355.405609  | 8.02101E-06 | 0.002148026 |
| 267.839998 | 627.878565  | 1.41703E-05 | 0.003795385 |
| 267.879998 | 1225.113056 | 2.76491E-05 | 0.00740664  |
| 267.919998 | 2541.040419 | 5.73477E-05 | 0.015364607 |
| 267.959998 | 5128.072315 | 0.000115733 | 0.031011935 |
| 267.999998 | 9252.19473  | 0.000208809 | 0.055960851 |
| 268.039998 | 14070.84045 | 0.000317559 | 0.085118586 |
| 268.079998 | 17453.06115 | 0.000393891 | 0.105594374 |
| 268.119998 | 17533.74253 | 0.000395712 | 0.10609834  |
| 268.159998 | 14415.75203 | 0.000325343 | 0.087244097 |
| 268.199998 | 9908.440281 | 0.00022362  | 0.059974802 |
| 268.239998 | 5769.35595  | 0.000130206 | 0.034926545 |
| 268.279998 | 2897.658017 | 6.53961E-05 | 0.017544467 |
| 268.319998 | 1328.252083 | 2.99768E-05 | 0.008043375 |
| 268.359998 | 616.103764  | 1.39046E-05 | 0.003731439 |
| 268.399998 | 355.230802  | 8.01706E-06 | 0.00215178  |
| 268.439998 | 308.799203  | 6.96917E-06 | 0.001870803 |
| 268.479998 | 364.996144  | 8.23745E-06 | 0.002211592 |
| 268.519998 | 453.409889  | 1.02328E-05 | 0.002747719 |
| 268.559998 | 521.807503  | 1.17765E-05 | 0.003162688 |
| 268.599998 | 519.037068  | 1.17139E-05 | 0.003146365 |
| 268.639998 | 456.0293    | 1.02919E-05 | 0.002764828 |
| 268.679998 | 362.124698  | 8.17265E-06 | 0.002195828 |
| 268.719998 | 273.326536  | 6.1686E-06  | 0.001657626 |
| 268.759998 | 235.055943  | 5.30489E-06 | 0.001425741 |
| 268.799998 | 277.247742  | 6.2571E-06  | 0.001681907 |
| 268.839998 | 445.0768    | 1.00448E-05 | 0.002700434 |
| 268.879998 | 865.824545  | 1.95405E-05 | 0.005254037 |
| 268.919998 | 1841.318911 | 4.1556E-05  | 0.01117524  |
| 268.959998 | 3758.512379 | 8.48244E-05 | 0.022814368 |
| 268.999998 | 6862.11055  | 0.000154868 | 0.041659566 |
| 269.039998 | 10596.18767 | 0.000239141 | 0.064338547 |
| 269.079998 | 13571.49707 | 0.00030629  | 0.082416455 |
| 269.119998 | 14560.35937 | 0.000328607 | 0.088434723 |
| 269.159998 | 13351.39711 | 0.000301322 | 0.081103946 |
| 269.199998 | 10556.99119 | 0.000238257 | 0.064138673 |
| 269.239998 | 7274.629753 | 0.000164178 | 0.044203355 |
| 269.279998 | 4383.48653  | 9.89292E-05 | 0.026639651 |
| 269.319998 | 2307.247252 | 5.20714E-05 | 0.014023858 |
| 269.359998 | 1097.507073 | 2.47692E-05 | 0.006671833 |
| 269.399998 | 558.906938  | 1.26138E-05 | 0.003398145 |
| 269.439998 | 405.254283  | 9.14602E-06 | 0.002464305 |
| 269.479998 | 432.888426  | 9.76969E-06 | 0.002632736 |
| 269.519998 | 499.038695  | 1.12626E-05 | 0.003035498 |
| 269.559998 | 585.433521  | 1.32124E-05 | 0.00356154  |
| 269.599998 | 610.030011  | 1.37675E-05 | 0.003711725 |

|            |             |             |             |
|------------|-------------|-------------|-------------|
| 269.639998 | 499.04305   | 1.12627E-05 | 0.003036876 |
| 269.679998 | 352.000159  | 7.94415E-06 | 0.002142379 |
| 269.719998 | 247.968764  | 5.59631E-06 | 0.001509437 |
| 269.759998 | 210.506988  | 4.75085E-06 | 0.001281589 |
| 269.799998 | 239.635873  | 5.40825E-06 | 0.001459145 |
| 269.839998 | 325.591746  | 7.34815E-06 | 0.001982825 |
| 269.879998 | 548.939838  | 1.23888E-05 | 0.003343491 |
| 269.919998 | 1129.49192  | 2.54911E-05 | 0.006880547 |
| 269.959998 | 2347.922271 | 5.29893E-05 | 0.014305001 |
| 269.999998 | 4341.824568 | 9.79889E-05 | 0.026457012 |
| 270.039998 | 6768.09383  | 0.000152746 | 0.041247651 |
| 270.079998 | 8664.974617 | 0.000195556 | 0.052815874 |
| 270.119998 | 9127.125102 | 0.000205987 | 0.055641073 |
| 270.159998 | 8160.126237 | 0.000184163 | 0.04975339  |
| 270.199998 | 6415.861509 | 0.000144797 | 0.039124165 |
| 270.239998 | 4584.960348 | 0.000103476 | 0.0279634   |
| 270.279998 | 3117.965154 | 7.03681E-05 | 0.019019098 |
| 270.319998 | 2078.244761 | 4.69031E-05 | 0.012678843 |
| 270.359998 | 1353.295615 | 3.0542E-05  | 0.008257334 |
| 270.399998 | 883.152714  | 1.99315E-05 | 0.005389485 |
| 270.439998 | 620.746987  | 1.40094E-05 | 0.003788701 |
| 270.479998 | 555.844184  | 1.25446E-05 | 0.003393071 |
| 270.519998 | 594.053487  | 1.3407E-05  | 0.003626851 |
| 270.559998 | 648.362685  | 1.46326E-05 | 0.003959008 |
| 270.599998 | 632.092372  | 1.42654E-05 | 0.003860229 |
| 270.639998 | 524.327683  | 1.18333E-05 | 0.003202577 |
| 270.679998 | 382.345569  | 8.62901E-06 | 0.0023357   |
| 270.719998 | 287.562932  | 6.48989E-06 | 0.001756944 |
| 270.759998 | 282.565977  | 6.37712E-06 | 0.001726669 |
| 270.799998 | 581.047944  | 1.31134E-05 | 0.00355112  |
| 270.839998 | 1882.255307 | 4.24799E-05 | 0.011505251 |
| 270.879998 | 6172.643726 | 0.000139308 | 0.037735743 |
| 270.919998 | 16643.07297 | 0.000375611 | 0.101760525 |
| 270.959998 | 35784.08252 | 0.000807597 | 0.218826454 |
| 270.999998 | 60913.99986 | 0.001374744 | 0.372555657 |
| 271.039998 | 81776.64887 | 0.001845585 | 0.500227371 |
| 271.079998 | 87558.27476 | 0.001976068 | 0.535672592 |
| 271.119998 | 76232.52322 | 0.001720462 | 0.466451618 |
| 271.159998 | 55047.24852 | 0.00124234  | 0.336872837 |
| 271.199998 | 34138.94527 | 0.000770468 | 0.20895104  |
| 271.239998 | 18679.21148 | 0.000421564 | 0.11434496  |
| 271.279998 | 9177.422658 | 0.000207122 | 0.05618796  |
| 271.319998 | 4066.047472 | 9.1765E-05  | 0.024897687 |
| 271.359998 | 1736.830519 | 3.91978E-05 | 0.010636727 |
| 271.399998 | 890.958711  | 2.01077E-05 | 0.005457229 |
| 271.439998 | 726.377329  | 1.63933E-05 | 0.004449804 |

|            |             |             |             |
|------------|-------------|-------------|-------------|
| 271.479998 | 876.550598  | 1.97825E-05 | 0.00537056  |
| 271.519998 | 1087.166636 | 2.45358E-05 | 0.00666197  |
| 271.559998 | 1159.962698 | 2.61787E-05 | 0.007109099 |
| 271.599998 | 1019.214207 | 2.30022E-05 | 0.00624741  |
| 271.639998 | 789.253965  | 1.78124E-05 | 0.00483855  |
| 271.679998 | 533.03367   | 1.20298E-05 | 0.003268264 |
| 271.719998 | 343.515838  | 7.75267E-06 | 0.002106557 |
| 271.759998 | 260.065899  | 5.86933E-06 | 0.001595048 |
| 271.799998 | 301.878471  | 6.81298E-06 | 0.001851767 |
| 271.839998 | 557.644813  | 1.25853E-05 | 0.003421179 |
| 271.879998 | 1378.04196  | 3.11005E-05 | 0.008455601 |
| 271.919998 | 3426.693087 | 7.73357E-05 | 0.021029121 |
| 271.959998 | 7550.94835  | 0.000170414 | 0.046345896 |
| 271.999998 | 13575.80044 | 0.000306387 | 0.083337238 |
| 272.039998 | 19327.42354 | 0.000436193 | 0.118661951 |
| 272.079998 | 21866.94989 | 0.000493507 | 0.134273275 |
| 272.119998 | 20007.6771  | 0.000451545 | 0.122874534 |
| 272.159998 | 15273.15889 | 0.000344694 | 0.093811897 |
| 272.199998 | 9956.708302 | 0.000224709 | 0.0611658   |
| 272.239998 | 5633.702163 | 0.000127145 | 0.034613903 |
| 272.279998 | 2828.688014 | 6.38395E-05 | 0.017382232 |
| 272.319998 | 1312.251446 | 2.96157E-05 | 0.008064944 |
| 272.359998 | 651.081719  | 1.4694E-05  | 0.00400206  |
| 272.399998 | 415.784455  | 9.38368E-06 | 0.002556113 |
| 272.439998 | 424.509991  | 9.5806E-06  | 0.002610138 |
| 272.479998 | 602.963939  | 1.36081E-05 | 0.003707923 |
| 272.519998 | 833.857859  | 1.8819E-05  | 0.005128557 |
| 272.559998 | 994.052187  | 2.24344E-05 | 0.006114713 |
| 272.599998 | 954.182762  | 2.15346E-05 | 0.005870325 |
| 272.639998 | 796.180666  | 1.79687E-05 | 0.004898983 |
| 272.679998 | 564.415884  | 1.27381E-05 | 0.00347342  |
| 272.719998 | 363.39675   | 8.20136E-06 | 0.002236674 |
| 272.759998 | 281.104065  | 6.34413E-06 | 0.001730424 |
| 272.799998 | 343.390783  | 7.74985E-06 | 0.00211416  |
| 272.839998 | 624.821363  | 1.41013E-05 | 0.003847412 |
| 272.879998 | 1370.941554 | 3.09402E-05 | 0.008442973 |
| 272.919998 | 3064.164128 | 6.91539E-05 | 0.018873487 |
| 272.959998 | 6263.831218 | 0.000141366 | 0.038587248 |
| 272.999998 | 11030.70009 | 0.000248948 | 0.067962677 |
| 273.039998 | 16060.45267 | 0.000362462 | 0.098966636 |
| 273.079998 | 19257.48383 | 0.000434615 | 0.11868455  |
| 273.119998 | 19423.0318  | 0.000438351 | 0.119722362 |
| 273.159998 | 16736.11226 | 0.000377711 | 0.103175466 |
| 273.199998 | 12487.37086 | 0.000281823 | 0.076993925 |
| 273.239998 | 8145.474135 | 0.000183832 | 0.050230257 |
| 273.279998 | 4607.283485 | 0.00010398  | 0.028415646 |

|            |             |             |             |
|------------|-------------|-------------|-------------|
| 273.319998 | 2282.776327 | 5.15191E-05 | 0.014081195 |
| 273.359998 | 1031.381881 | 2.32769E-05 | 0.00636296  |
| 273.399998 | 502.618508  | 1.13434E-05 | 0.003101285 |
| 273.439998 | 373.80447   | 8.43625E-06 | 0.002306807 |
| 273.479998 | 456.553115  | 1.03038E-05 | 0.002817874 |
| 273.519998 | 612.30791   | 1.38189E-05 | 0.003779756 |
| 273.559998 | 726.734796  | 1.64014E-05 | 0.004486765 |
| 273.599998 | 742.349814  | 1.67538E-05 | 0.00458384  |
| 273.639998 | 633.138692  | 1.42891E-05 | 0.003910058 |
| 273.679998 | 477.925063  | 1.07861E-05 | 0.002951941 |
| 273.719998 | 343.862509  | 7.7605E-06  | 0.002124203 |
| 273.759998 | 278.515289  | 6.2857E-06  | 0.001720774 |
| 273.799998 | 315.364025  | 7.11733E-06 | 0.001948724 |
| 273.839998 | 491.579053  | 1.10943E-05 | 0.003038051 |
| 273.879998 | 838.933793  | 1.89336E-05 | 0.005185525 |
| 273.919998 | 1587.187271 | 3.58206E-05 | 0.00981198  |
| 273.959998 | 3032.685565 | 6.84435E-05 | 0.018750778 |
| 273.999998 | 5305.872928 | 0.000119746 | 0.032810448 |
| 274.039998 | 8082.881365 | 0.000182419 | 0.049990205 |
| 274.079998 | 10209.90529 | 0.000230423 | 0.063154429 |
| 274.119998 | 10706.46651 | 0.00024163  | 0.066235625 |
| 274.159998 | 9485.346012 | 0.000214071 | 0.058689718 |
| 274.199998 | 7103.749119 | 0.000160322 | 0.043960216 |
| 274.239998 | 4503.539126 | 0.000101639 | 0.027873371 |
| 274.279998 | 2460.865832 | 5.55383E-05 | 0.015233049 |
| 274.319998 | 1208.092741 | 2.7265E-05  | 0.007479327 |
| 274.359998 | 607.230936  | 1.37044E-05 | 0.003759927 |
| 274.399998 | 369.84154   | 8.34681E-06 | 0.002290364 |
| 274.439998 | 316.312648  | 7.13874E-06 | 0.001959155 |
| 274.479998 | 378.02708   | 8.53154E-06 | 0.002341738 |
| 274.519998 | 501.715737  | 1.1323E-05  | 0.003108397 |
| 274.559998 | 629.883595  | 1.42156E-05 | 0.003903034 |
| 274.599998 | 660.26827   | 1.49013E-05 | 0.004091907 |
| 274.639998 | 582.104614  | 1.31373E-05 | 0.003608025 |
| 274.679998 | 452.326058  | 1.02084E-05 | 0.002804035 |
| 274.719998 | 345.000632  | 7.78618E-06 | 0.00213902  |
| 274.759998 | 296.3367    | 6.68791E-06 | 0.001837569 |
| 274.799998 | 326.059783  | 7.35872E-06 | 0.002022175 |
| 274.839998 | 490.201584  | 1.10632E-05 | 0.003040601 |
| 274.879998 | 980.38917   | 2.2126E-05  | 0.006082    |
| 274.919998 | 2153.033469 | 4.8591E-05  | 0.013358628 |
| 274.959998 | 4489.292066 | 0.000101317 | 0.027858141 |
| 274.999998 | 8176.083356 | 0.000184523 | 0.050743773 |
| 275.039998 | 12701.83982 | 0.000286663 | 0.078843745 |
| 275.079998 | 16661.91348 | 0.000376036 | 0.103440031 |
| 275.119998 | 18818.68246 | 0.000424711 | 0.116846614 |

|            |             |             |             |
|------------|-------------|-------------|-------------|
| 275.159998 | 18759.91746 | 0.000423385 | 0.116498673 |
| 275.199998 | 16573.9268  | 0.00037405  | 0.102938681 |
| 275.239998 | 12816.43108 | 0.000289249 | 0.079612894 |
| 275.279998 | 8566.255211 | 0.000193328 | 0.053219455 |
| 275.319998 | 4943.797598 | 0.000111575 | 0.030718726 |
| 275.359998 | 2443.63358  | 5.51494E-05 | 0.01518594  |
| 275.399998 | 1096.695872 | 2.47509E-05 | 0.006816397 |
| 275.439998 | 552.40175   | 1.24669E-05 | 0.003433893 |
| 275.479998 | 443.147509  | 1.00012E-05 | 0.002755137 |
| 275.519998 | 496.217745  | 1.11989E-05 | 0.003085533 |
| 275.559998 | 562.066101  | 1.2685E-05  | 0.003495492 |
| 275.599998 | 574.816452  | 1.29728E-05 | 0.003575305 |
| 275.639998 | 515.925307  | 1.16437E-05 | 0.003209474 |
| 275.679998 | 433.760482  | 9.78937E-06 | 0.002698733 |
| 275.719998 | 375.462606  | 8.47367E-06 | 0.00233636  |
| 275.759998 | 383.852453  | 8.66302E-06 | 0.002388913 |
| 275.799998 | 515.553785  | 1.16353E-05 | 0.003209024 |
| 275.839998 | 836.169303  | 1.88712E-05 | 0.005205425 |
| 275.879998 | 1417.503385 | 3.19911E-05 | 0.008825698 |
| 275.919998 | 2325.859911 | 5.24914E-05 | 0.014483432 |
| 275.959998 | 3662.75928  | 8.26634E-05 | 0.022811785 |
| 275.999998 | 5504.429116 | 0.000124227 | 0.034286734 |
| 276.039998 | 7670.693519 | 0.000173117 | 0.04778718  |
| 276.079998 | 9477.065913 | 0.000213884 | 0.059049143 |
| 276.119998 | 10117.51199 | 0.000228338 | 0.06304873  |
| 276.159998 | 9261.526491 | 0.00020902  | 0.057722894 |
| 276.199998 | 7270.34785  | 0.000164082 | 0.045319344 |
| 276.239998 | 4952.239049 | 0.000111765 | 0.030874001 |
| 276.279998 | 3007.860392 | 6.78832E-05 | 0.018754776 |
| 276.319998 | 1644.859058 | 3.71222E-05 | 0.0102576   |
| 276.359998 | 858.599141  | 1.93774E-05 | 0.005355135 |
| 276.399998 | 502.748236  | 1.13463E-05 | 0.003136125 |
| 276.439998 | 397.653112  | 8.97448E-06 | 0.002480904 |
| 276.479998 | 446.765307  | 1.00829E-05 | 0.002787712 |
| 276.519998 | 538.359112  | 1.215E-05   | 0.003359722 |
| 276.559998 | 590.628282  | 1.33297E-05 | 0.00368645  |
| 276.599998 | 597.442101  | 1.34834E-05 | 0.003729518 |
| 276.639998 | 537.289581  | 1.21259E-05 | 0.003354503 |
| 276.679998 | 427.002075  | 9.63684E-06 | 0.002666321 |
| 276.719998 | 321.27369   | 7.2507E-06  | 0.002006414 |
| 276.759998 | 271.933334  | 6.13716E-06 | 0.001698519 |
| 276.799998 | 311.055802  | 7.0201E-06  | 0.001943163 |
| 276.839998 | 490.722103  | 1.10749E-05 | 0.003065979 |
| 276.879998 | 957.643798  | 2.16127E-05 | 0.005984121 |
| 276.919998 | 2034.368406 | 4.59129E-05 | 0.012714189 |
| 276.959998 | 4327.754587 | 9.76714E-05 | 0.027051069 |

|            |             |             |             |
|------------|-------------|-------------|-------------|
| 276.999998 | 8024.41642  | 0.0001811   | 0.050164672 |
| 277.039998 | 12574.38194 | 0.000283786 | 0.078620152 |
| 277.079998 | 16904.01908 | 0.0003815   | 0.105706065 |
| 277.119998 | 19648.12687 | 0.000443431 | 0.122883558 |
| 277.159998 | 20106.25863 | 0.00045377  | 0.125766962 |
| 277.199998 | 18428.19701 | 0.000415899 | 0.115287129 |
| 277.239998 | 15088.59822 | 0.000340529 | 0.094408161 |
| 277.279998 | 10799.71259 | 0.000243734 | 0.067582693 |
| 277.319998 | 6630.083281 | 0.000149632 | 0.041495875 |
| 277.359998 | 3488.52271  | 7.87311E-05 | 0.021836857 |
| 277.399998 | 1633.527657 | 3.68664E-05 | 0.010226751 |
| 277.439998 | 786.121248  | 1.77417E-05 | 0.004922247 |
| 277.479998 | 539.62073   | 1.21785E-05 | 0.003379287 |
| 277.519998 | 556.074566  | 1.25498E-05 | 0.003482828 |
| 277.559998 | 650.609869  | 1.46834E-05 | 0.004075513 |
| 277.599998 | 692.70207   | 1.56333E-05 | 0.00433981  |
| 277.639998 | 610.027017  | 1.37675E-05 | 0.003822398 |
| 277.679998 | 482.728603  | 1.08945E-05 | 0.003025188 |
| 277.719998 | 375.488715  | 8.47426E-06 | 0.002353471 |
| 277.759998 | 327.388831  | 7.38871E-06 | 0.002052288 |
| 277.799998 | 371.082337  | 8.37481E-06 | 0.002326523 |
| 277.839998 | 518.941085  | 1.17118E-05 | 0.003254    |
| 277.879998 | 844.346144  | 1.90557E-05 | 0.005295202 |
| 277.919998 | 1529.270898 | 3.45135E-05 | 0.009591996 |
| 277.959998 | 2776.730929 | 6.26669E-05 | 0.017418905 |
| 277.999998 | 4656.411513 | 0.000105089 | 0.029214665 |
| 278.039998 | 7036.899769 | 0.000158813 | 0.044156373 |
| 278.079998 | 9184.421562 | 0.00020728  | 0.057640311 |
| 278.119998 | 10221.49684 | 0.000230685 | 0.064158097 |
| 278.159998 | 9749.631073 | 0.000220036 | 0.0612051   |
| 278.199998 | 7982.82685  | 0.000180161 | 0.050120869 |
| 278.239998 | 5654.068359 | 0.000127604 | 0.035504661 |
| 278.279998 | 3592.867852 | 8.1086E-05  | 0.022564618 |
| 278.319998 | 2046.914726 | 4.6196E-05  | 0.012857275 |
| 278.359998 | 1058.392526 | 2.38864E-05 | 0.006649031 |
| 278.399998 | 589.480163  | 1.33037E-05 | 0.003703763 |
| 278.439998 | 455.982601  | 1.02909E-05 | 0.002865396 |
| 278.479998 | 499.021623  | 1.12622E-05 | 0.003136304 |
| 278.519998 | 625.40948   | 1.41146E-05 | 0.003931204 |
| 278.559998 | 722.074108  | 1.62962E-05 | 0.004539471 |
| 278.599998 | 712.872309  | 1.60885E-05 | 0.004482266 |
| 278.639998 | 629.708547  | 1.42116E-05 | 0.003959933 |
| 278.679998 | 505.514262  | 1.14088E-05 | 0.003179391 |
| 278.719998 | 385.376802  | 8.69742E-06 | 0.002424144 |
| 278.759998 | 321.399571  | 7.25354E-06 | 0.002021997 |
| 278.799998 | 369.671463  | 8.34297E-06 | 0.00232602  |

|            |             |             |             |
|------------|-------------|-------------|-------------|
| 278.839998 | 552.878713  | 1.24777E-05 | 0.003479283 |
| 278.879998 | 1004.487238 | 2.26699E-05 | 0.006322175 |
| 278.919998 | 2099.323228 | 4.73788E-05 | 0.013214895 |
| 278.959998 | 4408.68645  | 9.94979E-05 | 0.027755937 |
| 278.999998 | 8371.373571 | 0.00018893  | 0.052711537 |
| 279.039998 | 13630.13116 | 0.000307613 | 0.085836352 |
| 279.079998 | 18432.15905 | 0.000415988 | 0.116093974 |
| 279.119998 | 20971.8797  | 0.000473306 | 0.132109201 |
| 279.159998 | 20531.22311 | 0.000463361 | 0.129351886 |
| 279.199998 | 17469.74007 | 0.000394268 | 0.110079541 |
| 279.239998 | 13050.97299 | 0.000294542 | 0.082247986 |
| 279.279998 | 8550.112119 | 0.000192964 | 0.053891019 |
| 279.319998 | 4928.908992 | 0.000111239 | 0.031071168 |
| 279.359998 | 2548.450229 | 5.7515E-05  | 0.016067382 |
| 279.399998 | 1262.45529  | 2.84919E-05 | 0.007960625 |
| 279.439998 | 733.663685  | 1.65578E-05 | 0.004626903 |
| 279.479998 | 653.752212  | 1.47543E-05 | 0.004123525 |
| 279.519998 | 717.925737  | 1.62026E-05 | 0.004528946 |
| 279.559998 | 798.512591  | 1.80213E-05 | 0.005038039 |
| 279.599998 | 805.36174   | 1.81759E-05 | 0.00508198  |
| 279.639998 | 690.296399  | 1.5579E-05  | 0.004356519 |
| 279.679998 | 502.496504  | 1.13406E-05 | 0.003171752 |
| 279.719998 | 335.956529  | 7.58207E-06 | 0.002120857 |
| 279.759998 | 255.23822   | 5.76037E-06 | 0.001611521 |
| 279.799998 | 248.753965  | 5.61403E-06 | 0.001570806 |
| 279.839998 | 333.67326   | 7.53054E-06 | 0.002107346 |
| 279.879998 | 599.617691  | 1.35325E-05 | 0.003787486 |
| 279.919998 | 1176.592525 | 2.65541E-05 | 0.007433011 |
| 279.959998 | 2367.085803 | 5.34218E-05 | 0.014955975 |
| 279.999998 | 4497.177163 | 0.000101495 | 0.028418607 |
| 280.039998 | 7358.121839 | 0.000166063 | 0.046504159 |
| 280.079998 | 9956.59001  | 0.000224706 | 0.062935759 |
| 280.119998 | 11163.3035  | 0.00025194  | 0.070573491 |
| 280.159998 | 10444.91832 | 0.000235727 | 0.066041348 |
| 280.199998 | 8307.675431 | 0.000187493 | 0.052535444 |
| 280.239998 | 5698.090345 | 0.000128598 | 0.036038293 |
| 280.279998 | 3446.46903  | 7.7782E-05  | 0.02180074  |
| 280.319998 | 1878.848667 | 4.2403E-05  | 0.011886408 |
| 280.359998 | 988.632546  | 2.23121E-05 | 0.006255409 |
| 280.399998 | 616.244378  | 1.39078E-05 | 0.003899741 |
| 280.439998 | 605.619771  | 1.3668E-05  | 0.003833052 |
| 280.479998 | 847.47419   | 1.91263E-05 | 0.005364548 |
| 280.519998 | 1119.560693 | 2.52669E-05 | 0.007087878 |
| 280.559998 | 1215.525303 | 2.74327E-05 | 0.007696522 |
| 280.599998 | 1111.706788 | 2.50897E-05 | 0.007040162 |
| 280.639998 | 881.892552  | 1.99031E-05 | 0.005585602 |



|            |             |             |             |
|------------|-------------|-------------|-------------|
| 280.679998 | 633.043185  | 1.42869E-05 | 0.004010048 |
| 280.719998 | 457.814915  | 1.03322E-05 | 0.002900468 |
| 280.759998 | 441.492738  | 9.96388E-06 | 0.002797458 |
| 280.799998 | 712.695484  | 1.60845E-05 | 0.00451654  |
| 280.839998 | 1403.797124 | 3.16817E-05 | 0.008897501 |
| 280.879998 | 2738.826135 | 6.18115E-05 | 0.017361611 |
| 280.919998 | 4783.88136  | 0.000107966 | 0.030329679 |
| 280.959998 | 7340.174072 | 0.000165658 | 0.046543132 |
| 280.999998 | 10223.63382 | 0.000230733 | 0.064836022 |
| 281.039998 | 13072.77207 | 0.000295034 | 0.082916427 |
| 281.079998 | 14862.95555 | 0.000335436 | 0.094284408 |
| 281.119998 | 14940.80504 | 0.000337193 | 0.09479174  |
| 281.159998 | 13289.70508 | 0.00029993  | 0.084328356 |
| 281.199998 | 10349.42604 | 0.000233572 | 0.065680483 |
| 281.239998 | 6986.733667 | 0.000157681 | 0.044346161 |
| 281.279998 | 4130.672961 | 9.32235E-05 | 0.026221916 |
| 281.319998 | 2173.772764 | 4.9059E-05  | 0.013801284 |
| 281.359998 | 1090.175125 | 2.46037E-05 | 0.006922507 |
| 281.399998 | 612.940411  | 1.38332E-05 | 0.003892666 |
| 281.439998 | 471.185687  | 1.0634E-05  | 0.002992834 |
| 281.479998 | 556.596988  | 1.25616E-05 | 0.003535844 |
| 281.519998 | 726.95901   | 1.64065E-05 | 0.004618744 |
| 281.559998 | 814.000029  | 1.83708E-05 | 0.005172496 |
| 281.599998 | 776.866812  | 1.75328E-05 | 0.004937237 |
| 281.639998 | 635.834449  | 1.43499E-05 | 0.004041505 |
| 281.679998 | 462.457843  | 1.0437E-05  | 0.002939902 |
| 281.719998 | 324.188008  | 7.31647E-06 | 0.002061196 |
| 281.759998 | 260.977007  | 5.88989E-06 | 0.001659535 |
| 281.799998 | 287.238602  | 6.48258E-06 | 0.00182679  |
| 281.839998 | 451.643267  | 1.0193E-05  | 0.002872784 |
| 281.879998 | 826.136691  | 1.86448E-05 | 0.005255583 |
| 281.919998 | 1531.613671 | 3.45664E-05 | 0.009744956 |
| 281.959998 | 2732.134871 | 6.16605E-05 | 0.017385788 |
| 281.999998 | 4474.857378 | 0.000100991 | 0.028479546 |
| 282.039998 | 6642.452923 | 0.000149911 | 0.042280873 |
| 282.079998 | 8497.931639 | 0.000191786 | 0.05409913  |
| 282.119998 | 9089.670377 | 0.000205141 | 0.057874435 |
| 282.159998 | 8140.44877  | 0.000183719 | 0.051838037 |
| 282.199998 | 6200.829892 | 0.000139944 | 0.039492223 |
| 282.239998 | 4164.542759 | 9.39879E-05 | 0.026527153 |
| 282.279998 | 2477.057827 | 5.59037E-05 | 0.015780509 |
| 282.319998 | 1338.93287  | 3.02178E-05 | 0.008531103 |
| 282.359998 | 713.584768  | 1.61046E-05 | 0.004547299 |
| 282.399998 | 443.864691  | 1.00174E-05 | 0.002828916 |
| 282.439998 | 372.480773  | 8.40637E-06 | 0.002374296 |
| 282.479998 | 386.837223  | 8.73038E-06 | 0.002466157 |

|            |             |             |             |
|------------|-------------|-------------|-------------|
| 282.519998 | 471.359407  | 1.06379E-05 | 0.003005427 |
| 282.559998 | 556.421929  | 1.25577E-05 | 0.003548295 |
| 282.599998 | 569.827507  | 1.28602E-05 | 0.003634296 |
| 282.639998 | 492.907076  | 1.11242E-05 | 0.003144151 |
| 282.679998 | 374.527698  | 8.45257E-06 | 0.002389372 |
| 282.719998 | 276.511178  | 6.24047E-06 | 0.001764306 |
| 282.759998 | 241.279129  | 5.44533E-06 | 0.001539723 |
| 282.799998 | 293.623402  | 6.62667E-06 | 0.001874023 |
| 282.839998 | 471.221467  | 1.06348E-05 | 0.00300795  |
| 282.879998 | 899.226236  | 2.02943E-05 | 0.005740847 |
| 282.919998 | 1842.453083 | 4.15816E-05 | 0.011764266 |
| 282.959998 | 3647.96756  | 8.23295E-05 | 0.023295968 |
| 282.999998 | 6497.172806 | 0.000146632 | 0.041496895 |
| 283.039998 | 9940.908559 | 0.000224352 | 0.06350072  |
| 283.079998 | 12823.23221 | 0.000289402 | 0.081924056 |
| 283.119998 | 13899.18488 | 0.000313685 | 0.088810565 |
| 283.159998 | 12765.06663 | 0.00028809  | 0.0815755   |
| 283.199998 | 10161.42974 | 0.000229329 | 0.064946062 |
| 283.239998 | 7248.121413 | 0.00016358  | 0.0463324   |
| 283.279998 | 4663.837814 | 0.000105256 | 0.029817011 |
| 283.319998 | 2667.086119 | 6.01924E-05 | 0.017053716 |
| 283.359998 | 1384.769917 | 3.12523E-05 | 0.00885566  |
| 283.399998 | 732.805442  | 1.65384E-05 | 0.004686982 |
| 283.439998 | 483.501397  | 1.0912E-05  | 0.003092884 |
| 283.479998 | 457.392122  | 1.03227E-05 | 0.00292628  |
| 283.519998 | 510.135093  | 1.1513E-05  | 0.003264177 |
| 283.559998 | 562.521551  | 1.26953E-05 | 0.003599887 |
| 283.599998 | 576.455237  | 1.30098E-05 | 0.003689577 |
| 283.639998 | 527.785523  | 1.19114E-05 | 0.003378545 |
| 283.679998 | 414.778471  | 9.36097E-06 | 0.002655521 |
| 283.719998 | 299.765969  | 6.7653E-06  | 0.001919451 |
| 283.759998 | 238.466633  | 5.38186E-06 | 0.001527157 |
| 283.799998 | 245.493993  | 5.54046E-06 | 0.001572382 |
| 283.839998 | 354.854182  | 8.00856E-06 | 0.002273151 |
| 283.879998 | 626.455205  | 1.41382E-05 | 0.004013558 |
| 283.919998 | 1220.081235 | 2.75355E-05 | 0.007817889 |
| 283.959998 | 2396.373798 | 5.40828E-05 | 0.015357357 |
| 283.999998 | 4326.517497 | 9.76435E-05 | 0.027730746 |
| 284.039998 | 6878.741924 | 0.000155244 | 0.044095399 |
| 284.079998 | 9161.880232 | 0.000206771 | 0.05873947  |
| 284.119998 | 10338.87873 | 0.000233334 | 0.066294882 |
| 284.159998 | 10633.25748 | 0.000239978 | 0.068192094 |
| 284.199998 | 10853.32341 | 0.000244944 | 0.069613196 |
| 284.239998 | 11500.42244 | 0.000259549 | 0.07377407  |
| 284.279998 | 12101.47824 | 0.000273114 | 0.077640707 |
| 284.319998 | 11515.10908 | 0.00025988  | 0.073889073 |

|            |             |             |             |
|------------|-------------|-------------|-------------|
| 284.359998 | 9464.09082  | 0.000213591 | 0.060736835 |
| 284.399998 | 6633.299231 | 0.000149704 | 0.04257591  |
| 284.439998 | 4015.702471 | 9.06288E-05 | 0.025778459 |
| 284.479998 | 2266.27473  | 5.11467E-05 | 0.014550203 |
| 284.519998 | 1394.438322 | 3.14705E-05 | 0.008953995 |
| 284.559998 | 1031.87174  | 2.32879E-05 | 0.006626807 |
| 284.599998 | 851.916638  | 1.92266E-05 | 0.005471882 |
| 284.639998 | 677.335644  | 1.52865E-05 | 0.004351156 |
| 284.679998 | 488.501912  | 1.10248E-05 | 0.003138542 |
| 284.719998 | 333.299667  | 7.52211E-06 | 0.002141695 |
| 284.759998 | 248.050416  | 5.59815E-06 | 0.00159413  |
| 284.799998 | 279.036154  | 6.29746E-06 | 0.001793516 |
| 284.839998 | 588.315055  | 1.32775E-05 | 0.003781949 |
| 284.879998 | 1583.611399 | 3.57399E-05 | 0.010181584 |
| 284.919998 | 4007.550324 | 9.04448E-05 | 0.02576954  |
| 284.959998 | 8530.856128 | 0.00019253  | 0.054863217 |
| 284.999998 | 14720.93557 | 0.000332231 | 0.094685838 |
| 285.039998 | 20322.93442 | 0.00045866  | 0.130736537 |
| 285.079998 | 23119.75619 | 0.000521781 | 0.148749239 |
| 285.119998 | 22479.45622 | 0.00050733  | 0.144649933 |
| 285.159998 | 19017.39245 | 0.000429196 | 0.122389547 |
| 285.199998 | 14504.46325 | 0.000327346 | 0.093358945 |
| 285.239998 | 10320.04151 | 0.000232909 | 0.066434952 |
| 285.279998 | 6996.318866 | 0.000157897 | 0.045044905 |
| 285.319998 | 4678.01578  | 0.000105576 | 0.03012303  |
| 285.359998 | 3085.06654  | 6.96257E-05 | 0.019868377 |
| 285.399998 | 1955.425807 | 4.41312E-05 | 0.012595055 |
| 285.439998 | 1209.878482 | 2.73053E-05 | 0.007794017 |
| 285.479998 | 830.618616  | 1.87459E-05 | 0.005351581 |
| 285.519998 | 752.70792   | 1.69876E-05 | 0.004850291 |
| 285.559998 | 757.959531  | 1.71061E-05 | 0.004884815 |
| 285.599998 | 739.208217  | 1.66829E-05 | 0.004764636 |
| 285.639998 | 656.009002  | 1.48052E-05 | 0.00422896  |
| 285.679998 | 493.130521  | 1.11293E-05 | 0.00317941  |
| 285.719998 | 349.613118  | 7.89028E-06 | 0.002254411 |
| 285.759998 | 302.960052  | 6.83739E-06 | 0.001953852 |
| 285.799998 | 353.172071  | 7.9706E-06  | 0.002277998 |
| 285.839998 | 527.598364  | 1.19072E-05 | 0.003403543 |
| 285.879998 | 970.021072  | 2.1892E-05  | 0.006258492 |
| 285.919998 | 1876.468257 | 4.23493E-05 | 0.012108505 |
| 285.959998 | 3469.854202 | 7.83098E-05 | 0.022393463 |
| 285.999998 | 5791.678804 | 0.00013071  | 0.037383095 |
| 286.039998 | 8299.375135 | 0.000187305 | 0.053576818 |
| 286.079998 | 9989.099717 | 0.00022544  | 0.064493894 |
| 286.119998 | 10062.84683 | 0.000227104 | 0.064979121 |
| 286.159998 | 8581.236759 | 0.000193667 | 0.055419623 |

|            |             |             |             |
|------------|-------------|-------------|-------------|
| 286.199998 | 6317.174005 | 0.00014257  | 0.040803482 |
| 286.239998 | 4055.896827 | 9.15359E-05 | 0.026201248 |
| 286.279998 | 2348.394395 | 5.3E-05     | 0.015172837 |
| 286.319998 | 1267.290141 | 2.8601E-05  | 0.008189031 |
| 286.359998 | 701.678944  | 1.58359E-05 | 0.004534773 |
| 286.399998 | 477.778483  | 1.07828E-05 | 0.003088192 |
| 286.439998 | 462.680523  | 1.04421E-05 | 0.002991022 |
| 286.479998 | 604.140302  | 1.36346E-05 | 0.003906042 |
| 286.519998 | 799.554025  | 1.80448E-05 | 0.005170202 |
| 286.559998 | 927.051377  | 2.09223E-05 | 0.005995482 |
| 286.599998 | 902.979459  | 2.0379E-05  | 0.005840618 |
| 286.639998 | 744.211813  | 1.67958E-05 | 0.004814355 |
| 286.679998 | 534.643404  | 1.20662E-05 | 0.003459126 |
| 286.719998 | 414.097474  | 9.3456E-06  | 0.002679571 |
| 286.759998 | 479.370293  | 1.08187E-05 | 0.003102376 |
| 286.799998 | 1161.651407 | 2.62169E-05 | 0.007518994 |
| 286.839998 | 3988.252612 | 9.00093E-05 | 0.025818269 |
| 286.879998 | 12678.51439 | 0.000286136 | 0.082086813 |
| 286.919998 | 32504.19347 | 0.000733574 | 0.210477157 |
| 286.959998 | 65660.54128 | 0.001481867 | 0.42523654  |
| 286.999998 | 104433.7844 | 0.002356925 | 0.676437484 |
| 287.039998 | 131398.6628 | 0.002965485 | 0.85121275  |
| 287.079998 | 131365.2039 | 0.00296473  | 0.851114589 |
| 287.119998 | 106420.6088 | 0.002401765 | 0.689594736 |
| 287.159998 | 71120.59561 | 0.001605093 | 0.46091844  |
| 287.199998 | 40270.00293 | 0.000908838 | 0.261018236 |
| 287.239998 | 19716.09628 | 0.000444965 | 0.127811697 |
| 287.279998 | 8669.227348 | 0.000195652 | 0.056207017 |
| 287.319998 | 3459.291691 | 7.80714E-05 | 0.022431473 |
| 287.359998 | 1320.392223 | 2.97994E-05 | 0.008563159 |
| 287.399998 | 618.806892  | 1.39656E-05 | 0.004013716 |
| 287.439998 | 466.781956  | 1.05346E-05 | 0.003028071 |
| 287.479998 | 523.991638  | 1.18258E-05 | 0.00339967  |
| 287.519998 | 649.732746  | 1.46636E-05 | 0.004216068 |
| 287.559998 | 741.514054  | 1.67349E-05 | 0.004812299 |
| 287.599998 | 736.182976  | 1.66146E-05 | 0.004778366 |
| 287.639998 | 661.039924  | 1.49188E-05 | 0.004291229 |
| 287.679998 | 522.917863  | 1.18015E-05 | 0.003395063 |
| 287.719998 | 381.663236  | 8.61361E-06 | 0.002478307 |
| 287.759998 | 317.481928  | 7.16512E-06 | 0.002061836 |
| 287.799998 | 384.628342  | 8.68053E-06 | 0.002498255 |
| 287.839998 | 802.444108  | 1.811E-05   | 0.005212796 |
| 287.879998 | 2156.928393 | 4.86789E-05 | 0.014013673 |
| 287.919998 | 5603.924735 | 0.000126473 | 0.036414041 |
| 287.959998 | 11943.30746 | 0.000269544 | 0.077617836 |
| 287.999998 | 20109.63424 | 0.000453846 | 0.130707772 |

|            |             |             |             |
|------------|-------------|-------------|-------------|
| 288.039998 | 26908.71349 | 0.000607292 | 0.174924439 |
| 288.079998 | 28778.22701 | 0.000649484 | 0.187103493 |
| 288.119998 | 25033.14393 | 0.000564963 | 0.162777193 |
| 288.159998 | 18117.24381 | 0.000408881 | 0.117823136 |
| 288.199998 | 11220.00987 | 0.00025322  | 0.072978002 |
| 288.239998 | 6063.531972 | 0.000136845 | 0.039444338 |
| 288.279998 | 2923.178806 | 6.59721E-05 | 0.019018429 |
| 288.319998 | 1330.78044  | 3.00339E-05 | 0.008659363 |
| 288.359998 | 726.423258  | 1.63944E-05 | 0.004727478 |
| 288.399998 | 654.081666  | 1.47617E-05 | 0.004257278 |
| 288.439998 | 936.611229  | 2.1138E-05  | 0.006097048 |
| 288.479998 | 1340.848156 | 3.02611E-05 | 0.008729715 |
| 288.519998 | 1626.03829  | 3.66974E-05 | 0.010587939 |
| 288.559998 | 1595.334295 | 3.60045E-05 | 0.010389451 |
| 288.599998 | 1268.110714 | 2.86195E-05 | 0.008259585 |
| 288.639998 | 865.869719  | 1.95415E-05 | 0.005640451 |
| 288.679998 | 545.734604  | 1.23165E-05 | 0.003555518 |
| 288.719998 | 353.664674  | 7.98172E-06 | 0.002304482 |
| 288.759998 | 293.634569  | 6.62692E-06 | 0.00191359  |
| 288.799998 | 385.972036  | 8.71085E-06 | 0.002515694 |
| 288.839998 | 804.710387  | 1.81612E-05 | 0.005245679 |
| 288.879998 | 2163.054171 | 4.88171E-05 | 0.014102289 |
| 288.919998 | 5552.586706 | 0.000125314 | 0.036205763 |
| 288.959998 | 11950.22294 | 0.0002697   | 0.077932479 |
| 288.999998 | 20780.03448 | 0.000468976 | 0.135534188 |
| 289.039998 | 29432.22089 | 0.000664244 | 0.191993151 |
| 289.079998 | 33923.00481 | 0.000765595 | 0.221318192 |
| 289.119998 | 32309.45817 | 0.000729179 | 0.210820366 |
| 289.159998 | 25911.4839  | 0.000584786 | 0.169096747 |
| 289.199998 | 17785.21453 | 0.000401388 | 0.11608127  |
| 289.239998 | 10724.82092 | 0.000242044 | 0.070008884 |
| 289.279998 | 5740.207919 | 0.000129548 | 0.037475789 |
| 289.319998 | 2692.452146 | 6.07649E-05 | 0.017580499 |
| 289.359998 | 1181.621554 | 2.66676E-05 | 0.007716523 |
| 289.399998 | 597.077294  | 1.34752E-05 | 0.003899724 |
| 289.439998 | 438.262745  | 9.89098E-06 | 0.002862845 |
| 289.479998 | 507.704802  | 1.14582E-05 | 0.003316917 |
| 289.519998 | 716.11937   | 1.61618E-05 | 0.004679169 |
| 289.559998 | 932.482967  | 2.10448E-05 | 0.006093744 |
| 289.599998 | 1035.32137  | 2.33658E-05 | 0.006766724 |
| 289.639998 | 950.829699  | 2.14589E-05 | 0.006215356 |
| 289.679998 | 687.155241  | 1.55081E-05 | 0.004492397 |
| 289.719998 | 430.199131  | 9.709E-06   | 0.00281289  |
| 289.759998 | 284.735385  | 6.42608E-06 | 0.001862021 |
| 289.799998 | 244.864346  | 5.52625E-06 | 0.001601506 |
| 289.839998 | 330.772575  | 7.46508E-06 | 0.002163678 |

|            |             |             |             |
|------------|-------------|-------------|-------------|
| 289.879998 | 666.824887  | 1.50493E-05 | 0.004362494 |
| 289.919998 | 1532.824366 | 3.45937E-05 | 0.010029409 |
| 289.959998 | 3292.079514 | 7.42976E-05 | 0.021543346 |
| 289.999998 | 5923.787858 | 0.000133692 | 0.038770576 |
| 290.039998 | 8924.697821 | 0.000201418 | 0.058419276 |
| 290.079998 | 11149.89705 | 0.000251638 | 0.072995048 |
| 290.119998 | 11366.48513 | 0.000256526 | 0.074423246 |
| 290.159998 | 9641.341635 | 0.000217592 | 0.063136393 |
| 290.199998 | 6911.705142 | 0.000155988 | 0.045267589 |
| 290.239998 | 4279.235266 | 9.65764E-05 | 0.028030328 |
| 290.279998 | 2334.089801 | 5.26772E-05 | 0.015291125 |
| 290.319998 | 1134.507876 | 2.56043E-05 | 0.007433429 |
| 290.359998 | 569.404604  | 1.28507E-05 | 0.00373132  |
| 290.399998 | 380.182383  | 8.58019E-06 | 0.002491686 |
| 290.439998 | 383.130409  | 8.64672E-06 | 0.002511353 |
| 290.479998 | 482.379271  | 1.08866E-05 | 0.003162348 |
| 290.519998 | 565.91234   | 1.27719E-05 | 0.003710479 |
| 290.559998 | 608.14958   | 1.37251E-05 | 0.003987962 |
| 290.599998 | 576.431027  | 1.30092E-05 | 0.003780487 |
| 290.639998 | 480.301723  | 1.08397E-05 | 0.003150462 |
| 290.679998 | 373.671944  | 8.43326E-06 | 0.002451379 |
| 290.719998 | 278.494666  | 6.28524E-06 | 0.001827244 |
| 290.759998 | 226.966341  | 5.12231E-06 | 0.001489364 |
| 290.799998 | 236.242469  | 5.33166E-06 | 0.001550448 |
| 290.839998 | 325.487498  | 7.3458E-06  | 0.002136452 |
| 290.879998 | 642.549338  | 1.45014E-05 | 0.00421818  |
| 290.919998 | 1496.945328 | 3.3784E-05  | 0.009828433 |
| 290.959998 | 3337.078341 | 7.53132E-05 | 0.021913131 |
| 290.999998 | 6486.869215 | 0.0001464   | 0.042602284 |
| 291.039998 | 10603.20781 | 0.0002393   | 0.069645764 |
| 291.079998 | 14722.80284 | 0.000332273 | 0.096718069 |
| 291.119998 | 17626.7578  | 0.000397811 | 0.115810846 |
| 291.159998 | 18290.6637  | 0.000412795 | 0.120189334 |
| 291.199998 | 16497.03479 | 0.000372315 | 0.108418155 |
| 291.239998 | 12769.8413  | 0.000288198 | 0.083934648 |
| 291.279998 | 8446.49062  | 0.000190626 | 0.055525404 |
| 291.319998 | 4755.924063 | 0.000107335 | 0.03126871  |
| 291.359998 | 2341.736145 | 5.28497E-05 | 0.015398295 |
| 291.399998 | 1088.973052 | 2.45766E-05 | 0.007161623 |
| 291.439998 | 579.903738  | 1.30876E-05 | 0.003814256 |
| 291.479998 | 477.881875  | 1.07851E-05 | 0.003143649 |
| 291.519998 | 532.195781  | 1.20109E-05 | 0.003501423 |
| 291.559998 | 585.386697  | 1.32114E-05 | 0.003851905 |
| 291.599998 | 588.828419  | 1.3289E-05  | 0.003875083 |
| 291.639998 | 521.690878  | 1.17738E-05 | 0.003433722 |
| 291.679998 | 382.442505  | 8.63119E-06 | 0.002517547 |

|            |             |             |             |
|------------|-------------|-------------|-------------|
| 291.719998 | 267.424057  | 6.03539E-06 | 0.001760644 |
| 291.759998 | 243.509143  | 5.49566E-06 | 0.001603414 |
| 291.799998 | 287.599862  | 6.49073E-06 | 0.001893995 |
| 291.839998 | 390.960725  | 8.82344E-06 | 0.002575032 |
| 291.879998 | 618.880425  | 1.39673E-05 | 0.004076766 |
| 291.919998 | 1187.38954  | 2.67977E-05 | 0.007822793 |
| 291.959998 | 2378.653183 | 5.36829E-05 | 0.015673256 |
| 291.999998 | 4254.682796 | 9.60223E-05 | 0.028038501 |
| 292.039998 | 6469.843316 | 0.000146015 | 0.042642323 |
| 292.079998 | 8318.869746 | 0.000187745 | 0.054836648 |
| 292.119998 | 9167.195788 | 0.000206891 | 0.060436952 |
| 292.159998 | 8689.539078 | 0.000196111 | 0.057295729 |
| 292.199998 | 7153.26417  | 0.000161439 | 0.047172536 |
| 292.239998 | 5120.009134 | 0.000115551 | 0.033768763 |
| 292.279998 | 3183.828422 | 7.18546E-05 | 0.021001654 |
| 292.319998 | 1765.664041 | 3.98486E-05 | 0.011648536 |
| 292.359998 | 953.377191  | 2.15164E-05 | 0.006290533 |
| 292.399998 | 608.123441  | 1.37245E-05 | 0.004013043 |
| 292.439998 | 584.605358  | 1.31937E-05 | 0.003858374 |
| 292.479998 | 746.439467  | 1.68461E-05 | 0.004927147 |
| 292.519998 | 1000.698118 | 2.25844E-05 | 0.006606378 |
| 292.559998 | 1191.889751 | 2.68993E-05 | 0.007869657 |
| 292.599998 | 1108.493755 | 2.50172E-05 | 0.007320021 |
| 292.639998 | 848.915029  | 1.91588E-05 | 0.00560664  |
| 292.679998 | 579.745106  | 1.3084E-05  | 0.003829437 |
| 292.719998 | 398.817461  | 9.00075E-06 | 0.002634701 |
| 292.759998 | 330.595352  | 7.46108E-06 | 0.002184305 |
| 292.799998 | 366.680759  | 8.27547E-06 | 0.002423059 |
| 292.839998 | 513.291197  | 1.15843E-05 | 0.003392337 |
| 292.879998 | 921.217992  | 2.07906E-05 | 0.006089153 |
| 292.919998 | 1850.924584 | 4.17728E-05 | 0.012236085 |
| 292.959998 | 3727.396526 | 8.41221E-05 | 0.024644424 |
| 292.999998 | 6803.433458 | 0.000153544 | 0.044988397 |
| 293.039998 | 10684.02995 | 0.000241124 | 0.070658881 |
| 293.079998 | 14582.49689 | 0.000329107 | 0.096454574 |
| 293.119998 | 17557.12854 | 0.00039624  | 0.116145849 |
| 293.159998 | 18879.46774 | 0.000426083 | 0.124910576 |
| 293.199998 | 18004.81532 | 0.000406344 | 0.119139944 |
| 293.239998 | 14974.83296 | 0.000337961 | 0.099103719 |
| 293.279998 | 10632.758   | 0.000239967 | 0.070377386 |
| 293.319998 | 6433.737541 | 0.0001452   | 0.042590209 |
| 293.359998 | 3387.589019 | 7.64532E-05 | 0.022428301 |
| 293.399998 | 1623.996019 | 3.66513E-05 | 0.0107535   |
| 293.439998 | 835.863136  | 1.88643E-05 | 0.00553553  |
| 293.479998 | 659.564946  | 1.48855E-05 | 0.004368585 |
| 293.519998 | 745.761549  | 1.68308E-05 | 0.004940176 |

|            |             |             |             |
|------------|-------------|-------------|-------------|
| 293.559998 | 830.967385  | 1.87538E-05 | 0.005505359 |
| 293.599998 | 809.476409  | 1.82688E-05 | 0.005363706 |
| 293.639998 | 662.961352  | 1.49621E-05 | 0.004393475 |
| 293.679998 | 491.997527  | 1.11037E-05 | 0.003260934 |
| 293.719998 | 345.604719  | 7.79982E-06 | 0.002290962 |
| 293.759998 | 255.467855  | 5.76555E-06 | 0.001693689 |
| 293.799998 | 268.251536  | 6.05406E-06 | 0.001778684 |
| 293.839998 | 368.363457  | 8.31345E-06 | 0.002442824 |
| 293.879998 | 612.605467  | 1.38257E-05 | 0.004063083 |
| 293.919998 | 1129.203688 | 2.54846E-05 | 0.00749042  |
| 293.959998 | 2058.227213 | 4.64513E-05 | 0.01365483  |
| 293.999998 | 3629.943724 | 8.19228E-05 | 0.024085295 |
| 294.039998 | 5771.730941 | 0.00013026  | 0.038301629 |
| 294.079998 | 7875.825983 | 0.000177746 | 0.052271668 |
| 294.119998 | 9114.413422 | 0.0002057   | 0.060500371 |
| 294.159998 | 9131.319319 | 0.000206081 | 0.060620833 |
| 294.199998 | 7977.032654 | 0.000180031 | 0.052964977 |
| 294.239998 | 6120.115004 | 0.000138122 | 0.040641156 |
| 294.279998 | 4131.108139 | 9.32334E-05 | 0.027436712 |
| 294.319998 | 2436.796018 | 5.49951E-05 | 0.016186155 |
| 294.359998 | 1305.738758 | 2.94687E-05 | 0.008674408 |
| 294.399998 | 724.317199  | 1.63468E-05 | 0.004812507 |
| 294.439998 | 500.603543  | 1.12979E-05 | 0.003326561 |
| 294.479998 | 464.076123  | 1.04736E-05 | 0.003084251 |
| 294.519998 | 538.26906   | 1.2148E-05  | 0.003577824 |
| 294.559998 | 655.410579  | 1.47917E-05 | 0.004357044 |
| 294.599998 | 706.450422  | 1.59436E-05 | 0.004696985 |
| 294.639998 | 633.138511  | 1.42891E-05 | 0.004210127 |
| 294.679998 | 472.085395  | 1.06543E-05 | 0.003139612 |
| 294.719998 | 353.009825  | 7.96694E-06 | 0.002348017 |
| 294.759998 | 336.722784  | 7.59936E-06 | 0.002239989 |
| 294.799998 | 487.510575  | 1.10024E-05 | 0.003243518 |
| 294.839998 | 876.378038  | 1.97786E-05 | 0.005831532 |
| 294.879998 | 1610.149134 | 3.63388E-05 | 0.010715592 |
| 294.919998 | 2840.45663  | 6.41051E-05 | 0.018905891 |
| 294.959998 | 4861.745433 | 0.000109723 | 0.032363844 |
| 294.999998 | 7846.860759 | 0.000177093 | 0.052242351 |
| 295.039998 | 11521.60465 | 0.000260027 | 0.076718238 |
| 295.079998 | 15275.0627  | 0.000344737 | 0.10172496  |
| 295.119998 | 18152.31443 | 0.000409672 | 0.120902533 |
| 295.159998 | 19482.9407  | 0.000439703 | 0.129782688 |
| 295.199998 | 18710.3455  | 0.000422266 | 0.124653051 |
| 295.239998 | 15899.62126 | 0.000358832 | 0.105941649 |
| 295.279998 | 11757.99458 | 0.000265362 | 0.078355961 |
| 295.319998 | 7469.217412 | 0.00016857  | 0.049782043 |
| 295.359998 | 4096.799406 | 9.24591E-05 | 0.027308707 |



|            |             |             |             |
|------------|-------------|-------------|-------------|
| 295.399998 | 2011.210299 | 4.53902E-05 | 0.013408269 |
| 295.439998 | 967.423797  | 2.18334E-05 | 0.006450462 |
| 295.479998 | 598.711188  | 1.35121E-05 | 0.003992549 |
| 295.519998 | 573.925028  | 1.29527E-05 | 0.003827778 |
| 295.559998 | 650.20675   | 1.46743E-05 | 0.004337124 |
| 295.599998 | 661.719591  | 1.49341E-05 | 0.004414517 |
| 295.639998 | 576.025962  | 1.30001E-05 | 0.003843351 |
| 295.679998 | 437.822263  | 9.88104E-06 | 0.002921625 |
| 295.719998 | 314.023313  | 7.08707E-06 | 0.002095788 |
| 295.759998 | 235.599538  | 5.31715E-06 | 0.001572601 |
| 295.799998 | 234.848627  | 5.30021E-06 | 0.001567801 |
| 295.839998 | 349.985835  | 7.89869E-06 | 0.002336749 |
| 295.879998 | 609.377166  | 1.37528E-05 | 0.004069177 |
| 295.919998 | 1119.550291 | 2.52667E-05 | 0.007476919 |
| 295.959998 | 2124.592105 | 4.79491E-05 | 0.014191011 |
| 295.999998 | 3697.59969  | 8.34497E-05 | 0.024701104 |
| 296.039998 | 5761.305654 | 0.000130025 | 0.038492495 |
| 296.079998 | 7838.007552 | 0.000176893 | 0.052374453 |
| 296.119998 | 9051.056114 | 0.00020427  | 0.060488352 |
| 296.159998 | 8831.296873 | 0.00019931  | 0.05902767  |
| 296.199998 | 7456.838633 | 0.00016829  | 0.049847634 |
| 296.239998 | 5542.181116 | 0.000125079 | 0.037053494 |
| 296.279998 | 3668.256992 | 8.27875E-05 | 0.024528266 |
| 296.319998 | 2177.478015 | 4.91426E-05 | 0.014561949 |
| 296.359998 | 1199.305903 | 2.70667E-05 | 0.008021476 |
| 296.399998 | 698.619073  | 1.57669E-05 | 0.004673297 |
| 296.439998 | 543.909405  | 1.22753E-05 | 0.003638883 |
| 296.479998 | 600.768506  | 1.35585E-05 | 0.004019827 |
| 296.519998 | 708.014155  | 1.59789E-05 | 0.004738061 |
| 296.559998 | 764.76539   | 1.72597E-05 | 0.005118534 |
| 296.599998 | 750.19343   | 1.69308E-05 | 0.005021681 |
| 296.639998 | 660.603196  | 1.49089E-05 | 0.004422574 |
| 296.679998 | 531.082298  | 1.19858E-05 | 0.003555943 |
| 296.719998 | 424.673964  | 9.5843E-06  | 0.002843853 |
| 296.759998 | 383.513037  | 8.65536E-06 | 0.002568563 |
| 296.799998 | 430.979883  | 9.72662E-06 | 0.00288686  |
| 296.839998 | 640.522022  | 1.44557E-05 | 0.004291027 |
| 296.879998 | 1088.226699 | 2.45598E-05 | 0.007291302 |
| 296.919998 | 1903.28708  | 4.29545E-05 | 0.012754061 |
| 296.959998 | 3380.557772 | 7.62945E-05 | 0.022656409 |
| 296.999998 | 5741.866084 | 0.000129586 | 0.038487018 |
| 297.039998 | 8751.159187 | 0.000197501 | 0.058665837 |
| 297.079998 | 11504.65824 | 0.000259644 | 0.077135072 |
| 297.119998 | 13033.4038  | 0.000294146 | 0.087396591 |
| 297.159998 | 12898.37034 | 0.000291098 | 0.086502756 |
| 297.199998 | 11179.59621 | 0.000252308 | 0.074985912 |

|            |             |             |             |
|------------|-------------|-------------|-------------|
| 297.239998 | 8604.26098  | 0.000194186 | 0.057719901 |
| 297.279998 | 5868.497839 | 0.000132444 | 0.039372899 |
| 297.319998 | 3534.967896 | 7.97793E-05 | 0.023719982 |
| 297.359998 | 1901.047155 | 4.2904E-05  | 0.012757929 |
| 297.399998 | 1007.198576 | 2.27311E-05 | 0.00676022  |
| 297.439998 | 619.9062    | 1.39904E-05 | 0.00416131  |
| 297.479998 | 527.475273  | 1.19044E-05 | 0.003541316 |
| 297.519998 | 579.39894   | 1.30762E-05 | 0.003890439 |
| 297.559998 | 683.051619  | 1.54155E-05 | 0.004587043 |
| 297.599998 | 727.144601  | 1.64106E-05 | 0.004883807 |
| 297.639998 | 643.942783  | 1.45329E-05 | 0.00432557  |
| 297.679998 | 493.118628  | 1.1129E-05  | 0.003312881 |
| 297.719998 | 343.072227  | 7.74266E-06 | 0.002305145 |
| 297.759998 | 258.290993  | 5.82927E-06 | 0.001735723 |
| 297.799998 | 251.18432   | 5.66888E-06 | 0.001688193 |
| 297.839998 | 346.088284  | 7.81073E-06 | 0.002326348 |
| 297.879998 | 543.598019  | 1.22683E-05 | 0.003654466 |
| 297.919998 | 931.779175  | 2.1029E-05  | 0.006264947 |
| 297.959998 | 1766.492738 | 3.98673E-05 | 0.011878855 |
| 297.999998 | 3150.801968 | 7.11092E-05 | 0.021190545 |
| 298.039998 | 4919.470855 | 0.000111026 | 0.033090071 |
| 298.079998 | 6569.856809 | 0.000148273 | 0.044197072 |
| 298.119998 | 7436.974427 | 0.000167842 | 0.050037103 |
| 298.159998 | 7051.71728  | 0.000159147 | 0.047451399 |
| 298.199998 | 5670.402597 | 0.000127973 | 0.038161575 |
| 298.239998 | 4012.098025 | 9.05475E-05 | 0.027004875 |
| 298.279998 | 2594.146399 | 5.85463E-05 | 0.017463182 |
| 298.319998 | 1540.315875 | 3.47628E-05 | 0.010370434 |
| 298.359998 | 870.654302  | 1.96495E-05 | 0.005862611 |
| 298.399998 | 536.606931  | 1.21105E-05 | 0.003613765 |
| 298.439998 | 423.553742  | 9.55902E-06 | 0.002852793 |
| 298.479998 | 431.838552  | 9.74599E-06 | 0.002908984 |
| 298.519998 | 510.874744  | 1.15297E-05 | 0.003441855 |
| 298.559998 | 586.790942  | 1.32431E-05 | 0.003953846 |
| 298.599998 | 572.154787  | 1.29127E-05 | 0.003855743 |
| 298.639998 | 493.003576  | 1.11264E-05 | 0.003322789 |
| 298.679998 | 386.727848  | 8.72791E-06 | 0.002606852 |
| 298.719998 | 301.67482   | 6.80838E-06 | 0.002033799 |
| 298.759998 | 246.544437  | 5.56416E-06 | 0.00166235  |
| 298.799998 | 241.794108  | 5.45696E-06 | 0.001630539 |
| 298.839998 | 342.109728  | 7.72094E-06 | 0.002307326 |
| 298.879998 | 641.759103  | 1.44836E-05 | 0.004328861 |
| 298.919998 | 1343.319309 | 3.03168E-05 | 0.009062311 |
| 298.959998 | 2763.449961 | 6.23672E-05 | 0.018645303 |
| 298.999998 | 5026.503185 | 0.000113441 | 0.033918911 |
| 299.039998 | 8088.425367 | 0.000182544 | 0.054588105 |

|            |             |             |             |
|------------|-------------|-------------|-------------|
| 299.079998 | 11138.3511  | 0.000251377 | 0.075181854 |
| 299.119998 | 13041.13616 | 0.00029432  | 0.088037081 |
| 299.159998 | 13109.26344 | 0.000295858 | 0.088508824 |
| 299.199998 | 11433.198   | 0.000258031 | 0.077202981 |
| 299.239998 | 8705.986255 | 0.000196482 | 0.058795268 |
| 299.279998 | 5799.58795  | 0.000130889 | 0.039172346 |
| 299.319998 | 3346.492799 | 7.55257E-05 | 0.022606347 |
| 299.359998 | 1701.788559 | 3.8407E-05  | 0.011497519 |
| 299.399998 | 851.632667  | 1.92202E-05 | 0.005754517 |
| 299.439998 | 528.237648  | 1.19216E-05 | 0.0035698   |
| 299.479998 | 494.627688  | 1.11631E-05 | 0.003343113 |
| 299.519998 | 558.853948  | 1.26126E-05 | 0.003777713 |
| 299.559998 | 646.703247  | 1.45952E-05 | 0.004372136 |
| 299.599998 | 676.498701  | 1.52676E-05 | 0.004574183 |
| 299.639998 | 620.412248  | 1.40018E-05 | 0.004195511 |
| 299.679998 | 500.769476  | 1.13017E-05 | 0.003386884 |
| 299.719998 | 365.832345  | 8.25633E-06 | 0.002474586 |
| 299.759998 | 271.293963  | 6.12273E-06 | 0.001835349 |
| 299.799998 | 255.801038  | 5.77307E-06 | 0.001730767 |
| 299.839998 | 331.458058  | 7.48055E-06 | 0.002242967 |
| 299.879998 | 539.819753  | 1.2183E-05  | 0.003653432 |
| 299.919998 | 996.356109  | 2.24864E-05 | 0.006744112 |
| 299.959998 | 1915.123833 | 4.32217E-05 | 0.012964774 |
| 299.999998 | 3414.848211 | 7.70684E-05 | 0.02312051  |
| 300.039998 | 5256.246619 | 0.000118626 | 0.035592594 |
| 300.079998 | 6934.995015 | 0.000156513 | 0.046966474 |
| 300.119998 | 7754.125262 | 0.000175    | 0.052520942 |
| 300.159998 | 7394.18454  | 0.000166876 | 0.050089634 |
| 300.199998 | 6069.818775 | 0.000136987 | 0.041123604 |
| 300.239998 | 4243.504732 | 9.577E-05   | 0.028753982 |
| 300.279998 | 2546.775808 | 5.74772E-05 | 0.017259248 |
| 300.319998 | 1386.004132 | 3.12802E-05 | 0.009394064 |
| 300.359998 | 763.662167  | 1.72348E-05 | 0.005176642 |
| 300.399998 | 498.554619  | 1.12517E-05 | 0.003380006 |
| 300.439998 | 435.689446  | 9.8329E-06  | 0.002954198 |
| 300.479998 | 468.038249  | 1.0563E-05  | 0.003173962 |
| 300.519998 | 575.660905  | 1.29919E-05 | 0.003904315 |
| 300.559998 | 714.215598  | 1.61189E-05 | 0.004844682 |
| 300.599998 | 769.819157  | 1.73737E-05 | 0.005222548 |
| 300.639998 | 686.294483  | 1.54887E-05 | 0.004656526 |
| 300.679998 | 517.012579  | 1.16683E-05 | 0.003508411 |
| 300.719998 | 368.888842  | 8.32531E-06 | 0.002503586 |
| 300.759998 | 315.629961  | 7.12333E-06 | 0.002142412 |
| 300.799998 | 489.94344   | 1.10573E-05 | 0.003326048 |
| 300.839998 | 1317.071831 | 2.97245E-05 | 0.008942312 |
| 300.879998 | 4048.299999 | 9.13645E-05 | 0.027489748 |

|            |             |             |             |
|------------|-------------|-------------|-------------|
| 300.919998 | 11312.73508 | 0.000255313 | 0.076828689 |
| 300.959998 | 25339.81392 | 0.000571884 | 0.172114299 |
| 300.999998 | 44726.08834 | 0.001009406 | 0.303831058 |
| 301.039998 | 62624.84833 | 0.001413356 | 0.425476566 |
| 301.079998 | 69785.28535 | 0.001574957 | 0.474187956 |
| 301.119998 | 63105.76043 | 0.001424209 | 0.428857846 |
| 301.159998 | 47198.99046 | 0.001065215 | 0.320800289 |
| 301.199998 | 29940.22257 | 0.000675709 | 0.203523586 |
| 301.239998 | 16422.81528 | 0.00037064  | 0.111651613 |
| 301.279998 | 8063.89096  | 0.000181991 | 0.054830184 |
| 301.319998 | 3673.953184 | 8.2916E-05  | 0.024984251 |
| 301.359998 | 1601.8106   | 3.61506E-05 | 0.010894355 |
| 301.399998 | 783.330349  | 1.76787E-05 | 0.005328353 |
| 301.439998 | 581.812135  | 1.31307E-05 | 0.003958115 |
| 301.479998 | 679.486921  | 1.53351E-05 | 0.004623218 |
| 301.519998 | 851.201249  | 1.92104E-05 | 0.005792328 |
| 301.559998 | 958.669988  | 2.16358E-05 | 0.006524506 |
| 301.599998 | 922.812221  | 2.08266E-05 | 0.006281298 |
| 301.639998 | 755.170502  | 1.70431E-05 | 0.005140895 |
| 301.679998 | 533.968179  | 1.20509E-05 | 0.003635521 |
| 301.719998 | 374.001199  | 8.44069E-06 | 0.002546724 |
| 301.759998 | 317.241396  | 7.1597E-06  | 0.00216051  |
| 301.799998 | 346.56519   | 7.82149E-06 | 0.002360527 |
| 301.839998 | 543.328897  | 1.22622E-05 | 0.003701215 |
| 301.879998 | 1197.968184 | 2.70365E-05 | 0.008161771 |
| 301.919998 | 2790.088858 | 6.29684E-05 | 0.019011425 |
| 301.959998 | 5899.346187 | 0.00013314  | 0.040202962 |
| 301.999998 | 10543.16514 | 0.000237945 | 0.071859254 |
| 302.039998 | 15319.7849  | 0.000345746 | 0.104429183 |
| 302.079998 | 17857.50916 | 0.000403019 | 0.121744011 |
| 302.119998 | 16974.59107 | 0.000383093 | 0.115740019 |
| 302.159998 | 13499.26684 | 0.00030466  | 0.092055959 |
| 302.199998 | 9234.19656  | 0.000208403 | 0.062979372 |
| 302.239998 | 5583.920173 | 0.000126021 | 0.038088678 |
| 302.279998 | 3057.123256 | 6.8995E-05  | 0.020855813 |
| 302.319998 | 1542.155641 | 3.48043E-05 | 0.010522037 |
| 302.359998 | 765.643387  | 1.72795E-05 | 0.005224631 |
| 302.399998 | 451.079895  | 1.01802E-05 | 0.003078506 |
| 302.439998 | 373.040474  | 8.419E-06   | 0.002546244 |
| 302.479998 | 419.81029   | 9.47453E-06 | 0.002865857 |
| 302.519998 | 534.983706  | 1.20738E-05 | 0.003652577 |
| 302.559998 | 620.986844  | 1.40148E-05 | 0.00424032  |
| 302.599998 | 598.818614  | 1.35145E-05 | 0.004089488 |
| 302.639998 | 517.341942  | 1.16757E-05 | 0.00353353  |
| 302.679998 | 425.683407  | 9.60708E-06 | 0.002907871 |
| 302.719998 | 336.94313   | 7.60434E-06 | 0.002301985 |

|            |             |             |             |
|------------|-------------|-------------|-------------|
| 302.759998 | 300.682758  | 6.78599E-06 | 0.002054527 |
| 302.799998 | 432.733891  | 9.7662E-06  | 0.002957206 |
| 302.839998 | 956.413673  | 2.15849E-05 | 0.006536778 |
| 302.879998 | 2626.681374 | 5.92805E-05 | 0.01795489  |
| 302.919998 | 6843.964053 | 0.000154459 | 0.04678864  |
| 302.959998 | 14789.07092 | 0.000333769 | 0.101118574 |
| 302.999998 | 25731.06796 | 0.000580714 | 0.175956451 |
| 303.039998 | 35944.67731 | 0.000811221 | 0.245832501 |
| 303.079998 | 40588.97562 | 0.000916037 | 0.277632384 |
| 303.119998 | 37903.62865 | 0.000855432 | 0.259298577 |
| 303.159998 | 29898.52659 | 0.000674768 | 0.204562696 |
| 303.199998 | 20395.09964 | 0.000460289 | 0.139559621 |
| 303.239998 | 12338.90363 | 0.000278472 | 0.084443809 |
| 303.279998 | 6748.329038 | 0.0001523   | 0.046189661 |
| 303.319998 | 3298.13084  | 7.44342E-05 | 0.022577387 |
| 303.359998 | 1481.462469 | 3.34345E-05 | 0.010142703 |
| 303.399998 | 707.648248  | 1.59706E-05 | 0.004845491 |
| 303.439998 | 453.737522  | 1.02402E-05 | 0.003107294 |
| 303.479998 | 458.120531  | 1.03391E-05 | 0.003137723 |
| 303.519998 | 576.721773  | 1.30158E-05 | 0.003950558 |
| 303.559998 | 679.344451  | 1.53319E-05 | 0.004654139 |
| 303.599998 | 668.259474  | 1.50817E-05 | 0.0045788   |
| 303.639998 | 560.436062  | 1.26483E-05 | 0.003840518 |
| 303.679998 | 436.76286   | 9.85713E-06 | 0.002993413 |
| 303.719998 | 320.264124  | 7.22792E-06 | 0.002195262 |
| 303.759998 | 249.176889  | 5.62358E-06 | 0.001708217 |
| 303.799998 | 257.187135  | 5.80436E-06 | 0.001763363 |
| 303.839998 | 378.78865   | 8.54873E-06 | 0.002597447 |
| 303.879998 | 739.537115  | 1.66903E-05 | 0.005071855 |
| 303.919998 | 1675.375496 | 3.78109E-05 | 0.011491486 |
| 303.959998 | 3622.126794 | 8.17464E-05 | 0.024847622 |
| 303.999998 | 6708.579065 | 0.000151403 | 0.046026598 |
| 304.039998 | 10306.84884 | 0.000232611 | 0.070723115 |
| 304.079998 | 12941.70313 | 0.000292076 | 0.088814534 |
| 304.119998 | 13539.1896  | 0.000305561 | 0.092927104 |
| 304.159998 | 11907.38693 | 0.000268733 | 0.081737871 |
| 304.199998 | 8811.765797 | 0.000198869 | 0.060496035 |
| 304.239998 | 5583.763745 | 0.000126018 | 0.038339646 |
| 304.279998 | 3091.907848 | 6.97801E-05 | 0.021232675 |
| 304.319998 | 1559.262001 | 3.51904E-05 | 0.010709134 |
| 304.359998 | 806.427253  | 1.81999E-05 | 0.005539334 |
| 304.399998 | 494.827796  | 1.11676E-05 | 0.00339941  |
| 304.439998 | 394.868604  | 8.91163E-06 | 0.002713058 |
| 304.479998 | 412.029589  | 9.29893E-06 | 0.002831339 |
| 304.519998 | 481.803122  | 1.08736E-05 | 0.003311236 |
| 304.559998 | 617.097399  | 1.3927E-05  | 0.004241616 |

|            |             |             |             |
|------------|-------------|-------------|-------------|
| 304.599998 | 712.095366  | 1.6071E-05  | 0.004895227 |
| 304.639998 | 658.983608  | 1.48723E-05 | 0.00453071  |
| 304.679998 | 516.478849  | 1.16562E-05 | 0.003551413 |
| 304.719998 | 379.987343  | 8.57579E-06 | 0.002613213 |
| 304.759998 | 293.518081  | 6.62429E-06 | 0.00201882  |
| 304.799998 | 292.509647  | 6.60154E-06 | 0.002012148 |
| 304.839998 | 457.791375  | 1.03317E-05 | 0.00314952  |
| 304.879998 | 921.544996  | 2.0798E-05  | 0.00634089  |
| 304.919998 | 2091.842406 | 4.721E-05   | 0.014395264 |
| 304.959998 | 4619.225003 | 0.000104249 | 0.031791919 |
| 304.999998 | 8584.828513 | 0.000193748 | 0.059093024 |
| 305.039998 | 13090.15785 | 0.000295427 | 0.090116939 |
| 305.079998 | 16543.61237 | 0.000373366 | 0.113906586 |
| 305.119998 | 17527.04378 | 0.000395561 | 0.120693561 |
| 305.159998 | 15749.38248 | 0.000355442 | 0.108466566 |
| 305.199998 | 12302.38978 | 0.000277648 | 0.084738108 |
| 305.239998 | 8357.600134 | 0.000188619 | 0.057574183 |
| 305.279998 | 4935.815206 | 0.000111394 | 0.034006505 |
| 305.319998 | 2578.312595 | 5.81889E-05 | 0.017766242 |
| 305.359998 | 1252.406914 | 2.82651E-05 | 0.008631025 |
| 305.399998 | 635.711557  | 1.43471E-05 | 0.004381612 |
| 305.439998 | 431.579259  | 9.74014E-06 | 0.002975029 |
| 305.479998 | 436.816094  | 9.85833E-06 | 0.003011523 |
| 305.519998 | 521.501262  | 1.17696E-05 | 0.003595835 |
| 305.559998 | 639.278147  | 1.44276E-05 | 0.004408503 |
| 305.599998 | 665.825208  | 1.50267E-05 | 0.004592174 |
| 305.639998 | 571.801698  | 1.29048E-05 | 0.003944213 |
| 305.679998 | 451.931427  | 1.01995E-05 | 0.003117772 |
| 305.719998 | 332.506213  | 7.5042E-06  | 0.002294185 |
| 305.759998 | 260.059279  | 5.86918E-06 | 0.001794559 |
| 305.799998 | 254.90713   | 5.7529E-06  | 0.001759236 |
| 305.839998 | 316.665869  | 7.14671E-06 | 0.002185749 |
| 305.879998 | 493.200269  | 1.11308E-05 | 0.003404702 |
| 305.919998 | 926.247554  | 2.09041E-05 | 0.006394987 |
| 305.959998 | 1860.955557 | 4.19992E-05 | 0.012850067 |
| 305.999998 | 3527.37779  | 7.9608E-05  | 0.024360049 |
| 306.039998 | 5662.960397 | 0.000127805 | 0.039113481 |
| 306.079998 | 7650.9973   | 0.000172672 | 0.052851553 |
| 306.119998 | 8664.595606 | 0.000195548 | 0.059861109 |
| 306.159998 | 8100.266197 | 0.000182812 | 0.055969637 |
| 306.199998 | 6369.664376 | 0.000143754 | 0.044017613 |
| 306.239998 | 4301.672408 | 9.70828E-05 | 0.029730623 |
| 306.279998 | 2565.643126 | 5.7903E-05  | 0.017734528 |
| 306.319998 | 1384.427565 | 3.12446E-05 | 0.009570846 |
| 306.359998 | 744.07714   | 1.67928E-05 | 0.005144637 |
| 306.399998 | 464.906417  | 1.04923E-05 | 0.003214838 |

|            |             |             |             |
|------------|-------------|-------------|-------------|
| 306.439998 | 376.817357  | 8.50424E-06 | 0.00260604  |
| 306.479998 | 393.657248  | 8.8843E-06  | 0.002722859 |
| 306.519998 | 474.393299  | 1.07064E-05 | 0.003281724 |
| 306.559998 | 581.499975  | 1.31236E-05 | 0.004023184 |
| 306.599998 | 630.701968  | 1.42341E-05 | 0.004364164 |
| 306.639998 | 595.273217  | 1.34345E-05 | 0.004119551 |
| 306.679998 | 471.225517  | 1.06349E-05 | 0.003261512 |
| 306.719998 | 339.905045  | 7.67118E-06 | 0.002352905 |
| 306.759998 | 256.97411   | 5.79955E-06 | 0.001779069 |
| 306.799998 | 239.369464  | 5.40224E-06 | 0.001657406 |
| 306.839998 | 326.88203   | 7.37727E-06 | 0.002263642 |
| 306.879998 | 571.450555  | 1.28968E-05 | 0.003957783 |
| 306.919998 | 1198.005558 | 2.70373E-05 | 0.008298293 |
| 306.959998 | 2607.249573 | 5.8842E-05  | 0.018062138 |
| 306.999998 | 5101.821917 | 0.000115141 | 0.035348291 |
| 307.039998 | 8440.845583 | 0.000190498 | 0.058490545 |
| 307.079998 | 11838.53795 | 0.000267179 | 0.082045423 |
| 307.119998 | 14227.49131 | 0.000321095 | 0.098614592 |
| 307.159998 | 14670.99526 | 0.000331104 | 0.101701882 |
| 307.199998 | 12963.05993 | 0.000292558 | 0.08987388  |
| 307.239998 | 9825.149447 | 0.00022174  | 0.068127378 |
| 307.279998 | 6354.363142 | 0.000143409 | 0.044066756 |
| 307.319998 | 3506.39905  | 7.91345E-05 | 0.024319627 |
| 307.359998 | 1695.26881  | 3.82599E-05 | 0.011759549 |
| 307.399998 | 779.961098  | 1.76026E-05 | 0.00541105  |
| 307.439998 | 446.537307  | 1.00777E-05 | 0.003098296 |
| 307.479998 | 403.878341  | 9.11497E-06 | 0.002802671 |
| 307.519998 | 443.811367  | 1.00162E-05 | 0.003080183 |
| 307.559998 | 519.046562  | 1.17142E-05 | 0.003602806 |
| 307.599998 | 589.624806  | 1.3307E-05  | 0.004093236 |
| 307.639998 | 561.859957  | 1.26804E-05 | 0.003900997 |
| 307.679998 | 438.921223  | 9.90584E-06 | 0.003047829 |
| 307.719998 | 309.755063  | 6.99074E-06 | 0.002151191 |
| 307.759998 | 234.397036  | 5.29001E-06 | 0.001628055 |
| 307.799998 | 222.200521  | 5.01476E-06 | 0.001543542 |
| 307.839998 | 263.225914  | 5.94064E-06 | 0.001828767 |
| 307.879998 | 369.105688  | 8.3302E-06  | 0.002564702 |
| 307.919998 | 662.414196  | 1.49498E-05 | 0.004603332 |
| 307.959998 | 1390.845507 | 3.13894E-05 | 0.009666694 |
| 307.999998 | 2725.634446 | 6.15138E-05 | 0.018946242 |
| 308.039998 | 4540.427701 | 0.000102471 | 0.031565206 |
| 308.079998 | 6384.115127 | 0.000144081 | 0.044388347 |
| 308.119998 | 7648.992108 | 0.000172627 | 0.053189861 |
| 308.159998 | 7732.957484 | 0.000174522 | 0.053780724 |
| 308.199998 | 6616.677125 | 0.000149329 | 0.046023255 |
| 308.239998 | 4863.365376 | 0.000109759 | 0.033832232 |

|            |             |             |             |
|------------|-------------|-------------|-------------|
| 308.279998 | 3091.10542  | 6.97619E-05 | 0.021506212 |
| 308.319998 | 1724.735132 | 3.89249E-05 | 0.012001316 |
| 308.359998 | 891.108154  | 2.01111E-05 | 0.006201449 |
| 308.399998 | 502.322006  | 1.13367E-05 | 0.003496241 |
| 308.439998 | 388.080112  | 8.75843E-06 | 0.002701449 |
| 308.479998 | 401.923769  | 9.07086E-06 | 0.002798179 |
| 308.519998 | 494.587421  | 1.11621E-05 | 0.003443746 |
| 308.559998 | 577.6659    | 1.30371E-05 | 0.004022732 |
| 308.599998 | 598.380158  | 1.35046E-05 | 0.004167522 |
| 308.639998 | 558.056268  | 1.25946E-05 | 0.003887183 |
| 308.679998 | 470.220662  | 1.06122E-05 | 0.003275782 |
| 308.719998 | 380.427495  | 8.58572E-06 | 0.002650583 |
| 308.759998 | 326.331804  | 7.36485E-06 | 0.002273972 |
| 308.799998 | 351.182611  | 7.9257E-06  | 0.002447457 |
| 308.839998 | 496.804696  | 1.12122E-05 | 0.003462773 |
| 308.879998 | 859.163663  | 1.93901E-05 | 0.005989222 |
| 308.919998 | 1639.018174 | 3.69904E-05 | 0.011427061 |
| 308.959998 | 3179.596459 | 7.17591E-05 | 0.02217068  |
| 308.999998 | 5796.380113 | 0.000130816 | 0.040422213 |
| 309.039998 | 9250.059625 | 0.000208761 | 0.064515487 |
| 309.079998 | 12822.81525 | 0.000289393 | 0.089445612 |
| 309.119998 | 15657.24033 | 0.000353362 | 0.109231293 |
| 309.159998 | 16865.5097  | 0.000380631 | 0.117675898 |
| 309.199998 | 15921.56065 | 0.000359327 | 0.111104046 |
| 309.239998 | 13178.41107 | 0.000297418 | 0.09197366  |
| 309.279998 | 9418.900739 | 0.000212571 | 0.065744104 |
| 309.319998 | 5741.297277 | 0.000129573 | 0.040079546 |
| 309.359998 | 3014.460061 | 6.80322E-05 | 0.02104643  |
| 309.399998 | 1458.824391 | 3.29236E-05 | 0.010186572 |
| 309.439998 | 813.234002  | 1.83536E-05 | 0.005679325 |
| 309.479998 | 679.60306   | 1.53377E-05 | 0.00474671  |
| 309.519998 | 768.445184  | 1.73427E-05 | 0.005367924 |
| 309.559998 | 869.493543  | 1.96233E-05 | 0.006074576 |
| 309.599998 | 868.64507   | 1.96041E-05 | 0.006069432 |
| 309.639998 | 767.705002  | 1.7326E-05  | 0.005364833 |
| 309.679998 | 641.877575  | 1.44863E-05 | 0.004486112 |
| 309.719998 | 522.396125  | 1.17898E-05 | 0.003651522 |
| 309.759998 | 449.284427  | 1.01397E-05 | 0.003140881 |
| 309.799998 | 495.375094  | 1.11799E-05 | 0.003463541 |
| 309.839998 | 698.238794  | 1.57583E-05 | 0.004882545 |
| 309.879998 | 1008.990701 | 2.27715E-05 | 0.007056437 |
| 309.919998 | 1415.754488 | 3.19516E-05 | 0.009902442 |
| 309.959998 | 2047.833353 | 4.62167E-05 | 0.014325343 |
| 309.999998 | 3179.675818 | 7.17609E-05 | 0.022245865 |
| 310.039998 | 4921.046811 | 0.000111061 | 0.034433406 |
| 310.079998 | 6818.107311 | 0.000153875 | 0.047713617 |



|            |             |             |             |
|------------|-------------|-------------|-------------|
| 310.119998 | 8222.312941 | 0.000185566 | 0.057547774 |
| 310.159998 | 8759.040803 | 0.000197679 | 0.061312227 |
| 310.199998 | 8273.694977 | 0.000186726 | 0.057922334 |
| 310.239998 | 6867.394595 | 0.000154988 | 0.048083331 |
| 310.279998 | 4980.15239  | 0.000112395 | 0.034873952 |
| 310.319998 | 3211.635885 | 7.24821E-05 | 0.02249266  |
| 310.359998 | 1921.586148 | 4.33675E-05 | 0.013459544 |
| 310.399998 | 1132.332517 | 2.55552E-05 | 0.007932324 |
| 310.439998 | 739.376319  | 1.66867E-05 | 0.005180217 |
| 310.479998 | 638.890056  | 1.44189E-05 | 0.004476767 |
| 310.519998 | 667.180478  | 1.50573E-05 | 0.004675603 |
| 310.559998 | 726.375315  | 1.63933E-05 | 0.005091097 |
| 310.599998 | 722.911836  | 1.63151E-05 | 0.005067474 |
| 310.639998 | 640.752302  | 1.44609E-05 | 0.00449213  |
| 310.679998 | 513.321707  | 1.1585E-05  | 0.003599214 |
| 310.719998 | 376.007107  | 8.48596E-06 | 0.002636756 |
| 310.759998 | 292.962788  | 6.61176E-06 | 0.002054671 |
| 310.799998 | 291.956639  | 6.58905E-06 | 0.002047878 |
| 310.839998 | 407.682373  | 9.20082E-06 | 0.002859984 |
| 310.879998 | 679.034899  | 1.53249E-05 | 0.004764196 |
| 310.919998 | 1274.597212 | 2.87659E-05 | 0.008943889 |
| 310.959998 | 2609.120481 | 5.88842E-05 | 0.018310635 |
| 310.999998 | 5110.538518 | 0.000115338 | 0.035870036 |
| 311.039998 | 8528.083251 | 0.000192467 | 0.059864923 |
| 311.079998 | 12150.92186 | 0.000274229 | 0.085307275 |
| 311.119998 | 15094.0059  | 0.000340651 | 0.105983242 |
| 311.159998 | 16451.46185 | 0.000371287 | 0.115529531 |
| 311.199998 | 15796.25784 | 0.0003565   | 0.110942655 |
| 311.239998 | 13354.17296 | 0.000301385 | 0.093803093 |
| 311.279998 | 9865.021983 | 0.00022264  | 0.069303318 |
| 311.319998 | 6366.11955  | 0.000143674 | 0.04472873  |
| 311.359998 | 3541.017143 | 7.99158E-05 | 0.024882591 |
| 311.399998 | 1775.791936 | 4.00772E-05 | 0.012480025 |
| 311.439998 | 923.17013   | 2.08347E-05 | 0.006488748 |
| 311.479998 | 642.891811  | 1.45092E-05 | 0.004519317 |
| 311.519998 | 629.918518  | 1.42164E-05 | 0.004428688 |
| 311.559998 | 669.907555  | 1.51189E-05 | 0.004710438 |
| 311.599998 | 701.112089  | 1.58231E-05 | 0.004930485 |
| 311.639998 | 646.567941  | 1.45921E-05 | 0.004547494 |
| 311.679998 | 526.012157  | 1.18714E-05 | 0.003700066 |
| 311.719998 | 402.742872  | 9.08935E-06 | 0.002833331 |
| 311.759998 | 313.129019  | 7.06689E-06 | 0.002203172 |
| 311.799998 | 304.063732  | 6.86229E-06 | 0.002139664 |
| 311.839998 | 405.054254  | 9.14151E-06 | 0.002850689 |
| 311.879997 | 592.409518  | 1.33699E-05 | 0.004169791 |
| 311.919997 | 898.570503  | 2.02795E-05 | 0.006325577 |

|            |             |             |             |
|------------|-------------|-------------|-------------|
| 311.959997 | 1494.892936 | 3.37377E-05 | 0.010524798 |
| 311.999997 | 2701.995933 | 6.09803E-05 | 0.019025849 |
| 312.039997 | 4555.385309 | 0.000102809 | 0.032080427 |
| 312.079997 | 6584.736582 | 0.000148608 | 0.046377688 |
| 312.119997 | 8045.156039 | 0.000181568 | 0.056670993 |
| 312.159997 | 8300.303068 | 0.000187326 | 0.058475771 |
| 312.199997 | 7436.828544 | 0.000167839 | 0.052399292 |
| 312.239997 | 5977.948957 | 0.000134914 | 0.042125541 |
| 312.279997 | 4278.646766 | 9.65631E-05 | 0.030154724 |
| 312.319997 | 2735.110057 | 6.17276E-05 | 0.019278771 |
| 312.359997 | 1611.014763 | 3.63584E-05 | 0.011356897 |
| 312.399997 | 925.95597   | 2.08975E-05 | 0.00652839  |
| 312.439997 | 591.809556  | 1.33563E-05 | 0.004173048 |
| 312.479997 | 508.401577  | 1.14739E-05 | 0.003585369 |
| 312.519997 | 576.233186  | 1.30048E-05 | 0.004064254 |
| 312.559997 | 736.84373   | 1.66295E-05 | 0.005197728 |
| 312.599997 | 876.671182  | 1.97852E-05 | 0.006184868 |
| 312.639997 | 824.713524  | 1.86126E-05 | 0.005819054 |
| 312.679997 | 632.489732  | 1.42744E-05 | 0.004463323 |
| 312.719997 | 474.615368  | 1.07114E-05 | 0.003349671 |
| 312.759997 | 410.512192  | 9.26469E-06 | 0.002897624 |
| 312.799997 | 467.209974  | 1.05443E-05 | 0.00329825  |
| 312.839997 | 686.095953  | 1.54842E-05 | 0.004844086 |
| 312.879997 | 1138.085589 | 2.5685E-05  | 0.008036325 |
| 312.919997 | 1973.737489 | 4.45445E-05 | 0.013938867 |
| 312.959997 | 3450.457908 | 7.7872E-05  | 0.02437083  |
| 312.999997 | 5951.780441 | 0.000134323 | 0.042043222 |
| 313.039997 | 9531.846658 | 0.000215121 | 0.067341321 |
| 313.079997 | 13480.12344 | 0.000304228 | 0.095247579 |
| 313.119997 | 16558.57112 | 0.000373704 | 0.11701416  |
| 313.159997 | 17633.57203 | 0.000397965 | 0.124626768 |
| 313.199997 | 16405.24049 | 0.000370243 | 0.11596024  |
| 313.239997 | 13534.38511 | 0.000305452 | 0.095679852 |
| 313.279997 | 9910.621248 | 0.000223669 | 0.070070998 |
| 313.319997 | 6414.359242 | 0.000144763 | 0.045357191 |
| 313.359997 | 3688.462096 | 8.32435E-05 | 0.026085168 |
| 313.399997 | 1959.70502  | 4.42278E-05 | 0.013860996 |
| 313.439997 | 1043.092289 | 2.35411E-05 | 0.007378735 |
| 313.479997 | 657.739626  | 1.48443E-05 | 0.004653381 |
| 313.519997 | 587.731721  | 1.32643E-05 | 0.004158619 |
| 313.559997 | 613.379998  | 1.38431E-05 | 0.004340652 |
| 313.599997 | 623.656249  | 1.40751E-05 | 0.004413937 |
| 313.639997 | 595.498896  | 1.34396E-05 | 0.00421519  |
| 313.679997 | 514.072167  | 1.16019E-05 | 0.003639282 |
| 313.719997 | 385.740869  | 8.70563E-06 | 0.002731132 |
| 313.759997 | 302.133513  | 6.81873E-06 | 0.002139446 |

|            |             |             |             |
|------------|-------------|-------------|-------------|
| 313.799997 | 289.381461  | 6.53094E-06 | 0.002049408 |
| 313.839997 | 354.50566   | 8.0007E-06  | 0.002510939 |
| 313.879997 | 491.072032  | 1.10828E-05 | 0.003478673 |
| 313.919997 | 792.809652  | 1.78926E-05 | 0.005616848 |
| 313.959997 | 1516.287723 | 3.42205E-05 | 0.010743869 |
| 313.999997 | 2823.817697 | 6.37296E-05 | 0.020011104 |
| 314.039997 | 4672.424379 | 0.00010545  | 0.033115552 |
| 314.079997 | 6692.345793 | 0.000151037 | 0.047437676 |
| 314.119997 | 8121.219368 | 0.000183285 | 0.057573361 |
| 314.159997 | 8249.794435 | 0.000186186 | 0.058492309 |
| 314.199997 | 7228.701233 | 0.000163142 | 0.051259127 |
| 314.239997 | 5558.02082  | 0.000125437 | 0.039417256 |
| 314.279997 | 3748.566242 | 8.45999E-05 | 0.026588062 |
| 314.319997 | 2262.510668 | 5.10617E-05 | 0.016049718 |
| 314.359997 | 1264.179873 | 2.85308E-05 | 0.008968936 |
| 314.399997 | 736.966541  | 1.66323E-05 | 0.005229198 |
| 314.439997 | 508.03253   | 1.14656E-05 | 0.003605239 |
| 314.479997 | 446.442263  | 1.00756E-05 | 0.003168568 |
| 314.519997 | 500.787255  | 1.13021E-05 | 0.003554727 |
| 314.559997 | 619.382013  | 1.39786E-05 | 0.004397105 |
| 314.599997 | 668.118068  | 1.50785E-05 | 0.004743694 |
| 314.639997 | 620.000124  | 1.39925E-05 | 0.004402612 |
| 314.679997 | 534.970715  | 1.20735E-05 | 0.003799303 |
| 314.719997 | 423.505849  | 9.55794E-06 | 0.003008074 |
| 314.759997 | 322.92698   | 7.28801E-06 | 0.002293975 |
| 314.799997 | 313.290058  | 7.07052E-06 | 0.0022258   |
| 314.839997 | 426.187462  | 9.61846E-06 | 0.003028275 |
| 314.879997 | 727.061616  | 1.64088E-05 | 0.005166793 |
| 314.919997 | 1398.442751 | 3.15609E-05 | 0.00993916  |
| 314.959997 | 2732.346491 | 6.16653E-05 | 0.019422088 |
| 314.999997 | 5046.513288 | 0.000113893 | 0.035876224 |
| 315.039997 | 8193.388483 | 0.000184913 | 0.058255106 |
| 315.079997 | 11338.31933 | 0.00025589  | 0.080625844 |
| 315.119997 | 13333.16427 | 0.000300911 | 0.094823056 |
| 315.159997 | 13495.17169 | 0.000304567 | 0.095987407 |
| 315.199997 | 12028.33378 | 0.000271463 | 0.085565055 |
| 315.239997 | 9426.843834 | 0.000212751 | 0.067067541 |
| 315.279997 | 6415.190373 | 0.000144782 | 0.04564684  |
| 315.319997 | 3803.994913 | 8.58509E-05 | 0.027070495 |
| 315.359997 | 2012.195734 | 4.54125E-05 | 0.014321272 |
| 315.399997 | 999.12575   | 2.25489E-05 | 0.007111916 |
| 315.439997 | 540.792405  | 1.22049E-05 | 0.003849923 |
| 315.479997 | 406.458427  | 9.1732E-06  | 0.002893961 |
| 315.519997 | 421.711714  | 9.51745E-06 | 0.003002945 |
| 315.559997 | 499.211019  | 1.12665E-05 | 0.003555256 |
| 315.599997 | 565.570074  | 1.27641E-05 | 0.004028359 |

|            |             |             |             |
|------------|-------------|-------------|-------------|
| 315.639997 | 570.474473  | 1.28748E-05 | 0.004063806 |
| 315.679997 | 516.702563  | 1.16613E-05 | 0.003681226 |
| 315.719997 | 403.700287  | 9.11095E-06 | 0.00287651  |
| 315.759997 | 306.456329  | 6.91629E-06 | 0.002183888 |
| 315.799997 | 272.2693    | 6.14474E-06 | 0.001940509 |
| 315.839997 | 299.510663  | 6.75954E-06 | 0.002134933 |
| 315.879997 | 392.504451  | 8.85828E-06 | 0.002798153 |
| 315.919997 | 672.614218  | 1.518E-05   | 0.004795655 |
| 315.959997 | 1367.682612 | 3.08667E-05 | 0.00975264  |
| 315.999997 | 2601.188451 | 5.87052E-05 | 0.018550843 |
| 316.039997 | 4239.127457 | 9.56712E-05 | 0.030235926 |
| 316.079997 | 5821.644182 | 0.000131386 | 0.041528613 |
| 316.119997 | 6941.269594 | 0.000156655 | 0.049521711 |
| 316.159997 | 7242.989809 | 0.000163464 | 0.051680838 |
| 316.199997 | 6416.454648 | 0.00014481  | 0.045789062 |
| 316.239997 | 4856.600267 | 0.000109607 | 0.034662024 |
| 316.279997 | 3228.139756 | 7.28546E-05 | 0.023042458 |
| 316.319997 | 1908.866057 | 4.30804E-05 | 0.013627207 |
| 316.359997 | 1033.339909 | 2.3321E-05  | 0.007377845 |
| 316.399997 | 590.590293  | 1.33288E-05 | 0.004217232 |
| 316.439997 | 418.597952  | 9.44717E-06 | 0.002989463 |
| 316.479997 | 403.234621  | 9.10044E-06 | 0.002880108 |
| 316.519997 | 485.512127  | 1.09573E-05 | 0.003468215 |
| 316.559997 | 602.565352  | 1.35991E-05 | 0.004304919 |
| 316.599997 | 682.75357   | 1.54088E-05 | 0.004878425 |
| 316.639997 | 652.516639  | 1.47264E-05 | 0.004662965 |
| 316.679997 | 518.935991  | 1.17117E-05 | 0.003708849 |
| 316.719997 | 398.780594  | 8.99992E-06 | 0.002850455 |
| 316.759997 | 316.081273  | 7.13351E-06 | 0.002259612 |
| 316.799997 | 310.179432  | 7.00032E-06 | 0.002217701 |
| 316.839997 | 435.250787  | 9.823E-06   | 0.003112321 |
| 316.879997 | 865.267317  | 1.95279E-05 | 0.006187994 |
| 316.919997 | 1899.296406 | 4.28645E-05 | 0.013584609 |
| 316.959997 | 4127.344697 | 9.31484E-05 | 0.029524323 |
| 316.999997 | 7810.851473 | 0.00017628  | 0.055880772 |
| 317.039997 | 12317.46085 | 0.000277988 | 0.088133294 |
| 317.079997 | 16390.67539 | 0.000369915 | 0.117292556 |
| 317.119997 | 18748.7569  | 0.000423133 | 0.13418404  |
| 317.159997 | 18919.52108 | 0.000426987 | 0.135423271 |
| 317.199997 | 16958.23318 | 0.000382724 | 0.121399957 |
| 317.239997 | 13423.30307 | 0.000302945 | 0.096106351 |
| 317.279997 | 9282.525019 | 0.000209494 | 0.066468148 |
| 317.319997 | 5541.475061 | 0.000125063 | 0.039685109 |
| 317.359997 | 2837.295308 | 6.40338E-05 | 0.020321768 |
| 317.399997 | 1293.282459 | 2.91876E-05 | 0.009264139 |
| 317.439997 | 634.867007  | 1.43281E-05 | 0.004548301 |

|            |             |             |             |
|------------|-------------|-------------|-------------|
| 317.479997 | 487.865915  | 1.10105E-05 | 0.003495599 |
| 317.519997 | 567.667665  | 1.28115E-05 | 0.004067897 |
| 317.559997 | 701.721337  | 1.58369E-05 | 0.005029157 |
| 317.599997 | 767.226488  | 1.73152E-05 | 0.005499318 |
| 317.639997 | 731.147419  | 1.6501E-05  | 0.005241371 |
| 317.679997 | 652.074476  | 1.47164E-05 | 0.00467511  |
| 317.719997 | 523.248843  | 1.1809E-05  | 0.003751955 |
| 317.759997 | 429.8223    | 9.70049E-06 | 0.003082428 |
| 317.799997 | 420.709105  | 9.49482E-06 | 0.003017453 |
| 317.839997 | 536.153323  | 1.21002E-05 | 0.003845938 |
| 317.879997 | 816.351407  | 1.84239E-05 | 0.005856594 |
| 317.919997 | 1353.932854 | 3.05564E-05 | 0.009714484 |
| 317.959997 | 2259.091546 | 5.09845E-05 | 0.016211047 |
| 317.999997 | 3686.159621 | 8.31915E-05 | 0.026454893 |
| 318.039997 | 5507.872354 | 0.000124305 | 0.039533964 |
| 318.079997 | 7407.214465 | 0.000167171 | 0.053173596 |
| 318.119997 | 8668.725557 | 0.000195641 | 0.062237334 |
| 318.159997 | 8734.473402 | 0.000197125 | 0.062717257 |
| 318.199997 | 7580.559059 | 0.000171083 | 0.054438502 |
| 318.239997 | 5748.508142 | 0.000129736 | 0.041287128 |
| 318.279997 | 3824.329839 | 8.63098E-05 | 0.027470682 |
| 318.319997 | 2242.218006 | 5.06037E-05 | 0.016108181 |
| 318.359997 | 1223.562248 | 2.76141E-05 | 0.008791223 |
| 318.399997 | 696.272351  | 1.57139E-05 | 0.005003305 |
| 318.439997 | 465.640161  | 1.05088E-05 | 0.003346438 |
| 318.479997 | 437.73466   | 9.87906E-06 | 0.003146283 |
| 318.519997 | 529.911572  | 1.19594E-05 | 0.003809297 |
| 318.559997 | 665.815582  | 1.50265E-05 | 0.004786851 |
| 318.599997 | 747.239117  | 1.68641E-05 | 0.005372917 |
| 318.639997 | 721.834754  | 1.62908E-05 | 0.005190902 |
| 318.679997 | 587.30114   | 1.32546E-05 | 0.004223966 |
| 318.719997 | 463.251703  | 1.04549E-05 | 0.0033322   |
| 318.759997 | 402.42868   | 9.08225E-06 | 0.00289506  |
| 318.799997 | 438.361449  | 9.89321E-06 | 0.003153954 |
| 318.839997 | 593.458539  | 1.33935E-05 | 0.004270394 |
| 318.879997 | 958.253925  | 2.16265E-05 | 0.006896244 |
| 318.919997 | 1772.206461 | 3.99962E-05 | 0.012755598 |
| 318.959997 | 3400.446211 | 7.67433E-05 | 0.024478054 |
| 318.999997 | 6003.21054  | 0.000135484 | 0.043219428 |
| 319.039997 | 9240.566151 | 0.000208547 | 0.066534741 |
| 319.079997 | 12020.01693 | 0.000271275 | 0.086558439 |
| 319.119997 | 13242.75524 | 0.000298871 | 0.095375566 |
| 319.159997 | 12618.48902 | 0.000284782 | 0.090890933 |
| 319.199997 | 10586.68165 | 0.000238927 | 0.076265389 |
| 319.239997 | 7897.052423 | 0.000178225 | 0.0568967   |
| 319.279997 | 5249.699909 | 0.000118478 | 0.037827788 |

|            |             |             |             |
|------------|-------------|-------------|-------------|
| 319.319997 | 3112.376014 | 7.0242E-05  | 0.022429673 |
| 319.359997 | 1643.129728 | 3.70831E-05 | 0.011842874 |
| 319.399997 | 850.737686  | 1.92E-05    | 0.006132469 |
| 319.439997 | 513.531864  | 1.15897E-05 | 0.003702213 |
| 319.479997 | 449.057991  | 1.01346E-05 | 0.003237806 |
| 319.519997 | 535.239328  | 1.20796E-05 | 0.003859676 |
| 319.559997 | 624.379425  | 1.40914E-05 | 0.004503039 |
| 319.599997 | 636.543205  | 1.43659E-05 | 0.00459134  |
| 319.639997 | 601.770204  | 1.35811E-05 | 0.004341068 |
| 319.679997 | 497.275851  | 1.12228E-05 | 0.003587712 |
| 319.719997 | 376.585129  | 8.499E-06   | 0.002717301 |
| 319.759997 | 280.707126  | 6.33517E-06 | 0.002025734 |
| 319.799997 | 274.302345  | 6.19062E-06 | 0.001979761 |
| 319.839997 | 347.854538  | 7.85059E-06 | 0.002510933 |
| 319.879997 | 483.839198  | 1.09196E-05 | 0.003492954 |
| 319.919997 | 788.8447    | 1.78031E-05 | 0.005695576 |
| 319.959997 | 1491.982227 | 3.3672E-05  | 0.01077368  |
| 319.999997 | 2758.488223 | 6.22552E-05 | 0.019921676 |
| 320.039997 | 4541.273302 | 0.00010249  | 0.032800967 |
| 320.079997 | 6300.157801 | 0.000142186 | 0.045510826 |
| 320.119997 | 7335.41463  | 0.00016555  | 0.052995895 |
| 320.159997 | 7155.907556 | 0.000161499 | 0.051705477 |
| 320.199997 | 5949.745478 | 0.000134277 | 0.042995645 |
| 320.239997 | 4306.784503 | 9.71981E-05 | 0.031126728 |
| 320.279997 | 2723.006725 | 6.14545E-05 | 0.019682637 |
| 320.319997 | 1554.52326  | 3.50834E-05 | 0.011237922 |
| 320.359997 | 837.048959  | 1.8891E-05  | 0.00605193  |
| 320.399997 | 483.493441  | 1.09118E-05 | 0.003496132 |
| 320.439997 | 369.33505   | 8.33538E-06 | 0.002670988 |
| 320.479997 | 372.680234  | 8.41087E-06 | 0.002695517 |
| 320.519997 | 429.95579   | 9.7035E-06  | 0.003110167 |
| 320.559997 | 530.202512  | 1.19659E-05 | 0.003835799 |
| 320.599997 | 613.708713  | 1.38506E-05 | 0.004440487 |
| 320.639997 | 631.665175  | 1.42558E-05 | 0.004570981 |
| 320.679997 | 539.753709  | 1.21815E-05 | 0.00390636  |
| 320.719997 | 399.621961  | 9.01891E-06 | 0.002892545 |
| 320.759997 | 348.958899  | 7.87552E-06 | 0.002526151 |
| 320.799997 | 435.069537  | 9.81891E-06 | 0.003149907 |
| 320.839997 | 764.015559  | 1.72428E-05 | 0.005532169 |
| 320.879997 | 1873.508299 | 4.22825E-05 | 0.0135676   |
| 320.919997 | 4646.620528 | 0.000104868 | 0.033654159 |
| 320.959997 | 9870.32482  | 0.000222759 | 0.071496883 |
| 320.999997 | 17312.27202 | 0.000390714 | 0.12541915  |
| 321.039997 | 24705.34232 | 0.000557565 | 0.179000719 |
| 321.079997 | 28782.59704 | 0.000649583 | 0.208568148 |
| 321.119997 | 27831.64978 | 0.000628122 | 0.201702396 |

|            |             |             |             |
|------------|-------------|-------------|-------------|
| 321.159997 | 22832.00537 | 0.000515287 | 0.16548943  |
| 321.199997 | 16352.38267 | 0.00036905  | 0.118539019 |
| 321.239997 | 10372.76903 | 0.000234099 | 0.075201946 |
| 321.279997 | 5941.247654 | 0.000134086 | 0.043079048 |
| 321.319997 | 3095.469514 | 6.98604E-05 | 0.022447555 |
| 321.359997 | 1526.083896 | 3.44416E-05 | 0.011068149 |
| 321.399997 | 804.162973  | 1.81488E-05 | 0.005833037 |
| 321.439997 | 598.070029  | 1.34976E-05 | 0.004338671 |
| 321.479997 | 628.207212  | 1.41778E-05 | 0.004557867 |
| 321.519997 | 722.380944  | 1.63031E-05 | 0.005241783 |
| 321.559997 | 820.3866    | 1.8515E-05  | 0.005953678 |
| 321.599997 | 830.94148   | 1.87532E-05 | 0.006031026 |
| 321.639997 | 722.029048  | 1.62952E-05 | 0.005241185 |
| 321.679997 | 550.093039  | 1.24148E-05 | 0.003993604 |
| 321.719997 | 393.397479  | 8.87843E-06 | 0.002856369 |
| 321.759997 | 299.862168  | 6.76747E-06 | 0.002177502 |
| 321.799997 | 274.702111  | 6.19964E-06 | 0.001995045 |
| 321.839997 | 323.469824  | 7.30026E-06 | 0.002349517 |
| 321.879997 | 539.580579  | 1.21776E-05 | 0.00391972  |
| 321.919997 | 1100.400167 | 2.48345E-05 | 0.007994722 |
| 321.959997 | 2329.446979 | 5.25724E-05 | 0.016926201 |
| 321.999997 | 4471.280458 | 0.000100911 | 0.032493204 |
| 322.039997 | 7002.871674 | 0.000158045 | 0.05089683  |
| 322.079997 | 9024.504643 | 0.00020367  | 0.065598194 |
| 322.119997 | 9755.320272 | 0.000220164 | 0.070919224 |
| 322.159997 | 8902.305434 | 0.000200913 | 0.064726013 |
| 322.199997 | 7031.386297 | 0.000158689 | 0.051129465 |
| 322.239997 | 4866.62609  | 0.000109833 | 0.035392577 |
| 322.279997 | 3012.026272 | 6.79772E-05 | 0.021907704 |
| 322.319997 | 1708.374392 | 3.85556E-05 | 0.012427251 |
| 322.359997 | 921.406383  | 2.07949E-05 | 0.006703431 |
| 322.399997 | 549.439865  | 1.24001E-05 | 0.00399779  |
| 322.439997 | 407.448527  | 9.19555E-06 | 0.002965012 |
| 322.479997 | 399.177198  | 9.00887E-06 | 0.002905181 |
| 322.519997 | 477.922158  | 1.0786E-05  | 0.003478713 |
| 322.559997 | 580.708683  | 1.31058E-05 | 0.004227402 |
| 322.599997 | 654.426807  | 1.47695E-05 | 0.004764641 |
| 322.639997 | 654.748011  | 1.47768E-05 | 0.004767571 |
| 322.679997 | 563.066146  | 1.27076E-05 | 0.004100494 |
| 322.719997 | 412.960579  | 9.31995E-06 | 0.003007733 |
| 322.759997 | 312.827111  | 7.06007E-06 | 0.002278709 |
| 322.799997 | 333.59293   | 7.52873E-06 | 0.002430273 |
| 322.839997 | 499.258111  | 1.12676E-05 | 0.003637619 |
| 322.879997 | 869.461722  | 1.96225E-05 | 0.006335726 |
| 322.919997 | 1631.113653 | 3.6812E-05  | 0.011887319 |
| 322.959997 | 3111.247731 | 7.02165E-05 | 0.02267713  |

|            |             |             |             |
|------------|-------------|-------------|-------------|
| 322.999997 | 5628.662806 | 0.000127031 | 0.041031038 |
| 323.039997 | 8872.346358 | 0.000200236 | 0.064684398 |
| 323.079997 | 11753.44536 | 0.000265259 | 0.085699842 |
| 323.119997 | 13381.53001 | 0.000302002 | 0.097583045 |
| 323.159997 | 13060.33087 | 0.000294753 | 0.095252532 |
| 323.199997 | 10906.1602  | 0.000246137 | 0.079551427 |
| 323.239997 | 7835.976534 | 0.000176847 | 0.057164048 |
| 323.279997 | 4869.262775 | 0.000109892 | 0.03552604  |
| 323.319997 | 2649.394213 | 5.97931E-05 | 0.019332317 |
| 323.359997 | 1294.744457 | 2.92206E-05 | 0.009448766 |
| 323.399997 | 651.875159  | 1.47119E-05 | 0.004757833 |
| 323.439997 | 423.506656  | 9.55796E-06 | 0.003091425 |
| 323.479997 | 401.460307  | 9.0604E-06  | 0.002930858 |
| 323.519997 | 500.396572  | 1.12933E-05 | 0.003653593 |
| 323.559997 | 618.339667  | 1.39551E-05 | 0.004515301 |
| 323.599997 | 704.431055  | 1.5898E-05  | 0.005144602 |
| 323.639997 | 700.543906  | 1.58103E-05 | 0.005116846 |
| 323.679997 | 585.976697  | 1.32247E-05 | 0.004280564 |
| 323.719997 | 433.528372  | 9.78413E-06 | 0.003167319 |
| 323.759997 | 310.146504  | 6.99957E-06 | 0.002266182 |
| 323.799997 | 262.404116  | 5.9221E-06  | 0.001917574 |
| 323.839997 | 319.955767  | 7.22096E-06 | 0.002338434 |
| 323.879997 | 487.244511  | 1.09964E-05 | 0.003561524 |
| 323.919997 | 816.155946  | 1.84195E-05 | 0.005966445 |
| 323.959997 | 1545.993357 | 3.48909E-05 | 0.011303261 |
| 323.999997 | 2951.09824  | 6.66022E-05 | 0.021579105 |
| 324.039997 | 4897.930942 | 0.000110539 | 0.035819212 |
| 324.079997 | 6887.791362 | 0.000155448 | 0.050377541 |
| 324.119997 | 8231.274592 | 0.000185768 | 0.060211254 |
| 324.159997 | 8359.882452 | 0.000188671 | 0.061159559 |
| 324.199997 | 7276.292517 | 0.000164216 | 0.053238758 |
| 324.239997 | 5545.345014 | 0.000125151 | 0.040578867 |
| 324.279997 | 3765.921292 | 8.49916E-05 | 0.027561075 |
| 324.319997 | 2235.411347 | 5.04501E-05 | 0.016361983 |
| 324.359997 | 1213.916258 | 2.73964E-05 | 0.008886296 |
| 324.399997 | 687.243503  | 1.55101E-05 | 0.005031486 |
| 324.439997 | 453.756555  | 1.02407E-05 | 0.003322478 |
| 324.479997 | 411.546794  | 9.28804E-06 | 0.003013783 |
| 324.519997 | 487.576721  | 1.10039E-05 | 0.003570995 |
| 324.559997 | 576.209564  | 1.30042E-05 | 0.004220658 |
| 324.599997 | 670.85324   | 1.51402E-05 | 0.004914516 |
| 324.639997 | 693.01811   | 1.56405E-05 | 0.005077517 |
| 324.679997 | 596.154759  | 1.34544E-05 | 0.004368369 |
| 324.719997 | 463.731517  | 1.04658E-05 | 0.003398446 |
| 324.759997 | 394.108217  | 8.89447E-06 | 0.002888569 |
| 324.799997 | 448.916941  | 1.01314E-05 | 0.003290688 |



|            |             |             |             |
|------------|-------------|-------------|-------------|
| 324.839997 | 676.278443  | 1.52627E-05 | 0.004957923 |
| 324.879997 | 1249.394421 | 2.81971E-05 | 0.009160671 |
| 324.919997 | 2552.477979 | 5.76059E-05 | 0.0187173   |
| 324.959997 | 5447.549265 | 0.000122944 | 0.039951752 |
| 324.999997 | 10279.79644 | 0.000232001 | 0.075400223 |
| 325.039997 | 16207.6141  | 0.000365783 | 0.118894195 |
| 325.079997 | 21279.23794 | 0.000480243 | 0.156117315 |
| 325.119997 | 23485.69761 | 0.000530039 | 0.172326435 |
| 325.159997 | 22167.32908 | 0.000500286 | 0.16267291  |
| 325.199997 | 17992.88635 | 0.000406074 | 0.132055388 |
| 325.239997 | 12683.46088 | 0.000286248 | 0.093099313 |
| 325.279997 | 7815.938215 | 0.000176395 | 0.057377713 |
| 325.319997 | 4219.869979 | 9.52366E-05 | 0.030982366 |
| 325.359997 | 2017.977445 | 4.55429E-05 | 0.014817851 |
| 325.399997 | 966.880251  | 2.18211E-05 | 0.007100599 |
| 325.439997 | 568.72944   | 1.28354E-05 | 0.004177163 |
| 325.479997 | 502.649318  | 1.13441E-05 | 0.003692276 |
| 325.519997 | 602.269192  | 1.35924E-05 | 0.00442459  |
| 325.559997 | 737.277276  | 1.66393E-05 | 0.005417097 |
| 325.599997 | 772.76363   | 1.74402E-05 | 0.005678529 |
| 325.639997 | 736.080617  | 1.66123E-05 | 0.005409634 |
| 325.679997 | 609.710512  | 1.37603E-05 | 0.00448146  |
| 325.719997 | 464.451346  | 1.0482E-05  | 0.003414204 |
| 325.759997 | 353.131197  | 7.96968E-06 | 0.002596203 |
| 325.799997 | 339.173889  | 7.65468E-06 | 0.002493895 |
| 325.839997 | 424.241413  | 9.57454E-06 | 0.003119767 |
| 325.879997 | 568.003183  | 1.2819E-05  | 0.004177469 |
| 325.919997 | 930.665486  | 2.10038E-05 | 0.006845566 |
| 325.959997 | 1739.995136 | 3.92693E-05 | 0.01280021  |
| 325.999997 | 3223.424457 | 7.27482E-05 | 0.023715913 |
| 326.039997 | 5350.931856 | 0.000120763 | 0.039373594 |
| 326.079997 | 7542.662138 | 0.000170227 | 0.055507743 |
| 326.119997 | 8795.024308 | 0.000198491 | 0.06473203  |
| 326.159997 | 8672.427312 | 0.000195725 | 0.063837536 |
| 326.199997 | 7386.423033 | 0.000166701 | 0.054377957 |
| 326.239997 | 5567.899035 | 0.00012566  | 0.040995229 |
| 326.279997 | 3783.023658 | 8.53776E-05 | 0.027856995 |
| 326.319997 | 2331.478231 | 5.26182E-05 | 0.017170376 |
| 326.359997 | 1356.447192 | 3.06131E-05 | 0.009990899 |
| 326.399997 | 764.024833  | 1.7243E-05  | 0.005628107 |
| 326.439997 | 488.185045  | 1.10177E-05 | 0.003596604 |
| 326.479997 | 426.843593  | 9.63327E-06 | 0.003145068 |
| 326.519997 | 511.506771  | 1.1544E-05  | 0.003769345 |
| 326.559997 | 605.328885  | 1.36614E-05 | 0.004461276 |
| 326.599997 | 586.260009  | 1.32311E-05 | 0.004321268 |
| 326.639997 | 503.130004  | 1.13549E-05 | 0.003708979 |

|            |             |             |             |
|------------|-------------|-------------|-------------|
| 326.679997 | 432.203952  | 9.75424E-06 | 0.003186515 |
| 326.719997 | 350.804466  | 7.91717E-06 | 0.002586697 |
| 326.759997 | 282.178158  | 6.36837E-06 | 0.002080928 |
| 326.799997 | 286.037026  | 6.45546E-06 | 0.002109643 |
| 326.839997 | 364.257782  | 8.22079E-06 | 0.002686883 |
| 326.879997 | 583.807918  | 1.31757E-05 | 0.004306883 |
| 326.919997 | 1192.750471 | 2.69187E-05 | 0.008800267 |
| 326.959997 | 2592.706018 | 5.85138E-05 | 0.01913166  |
| 326.999997 | 4998.622256 | 0.000112812 | 0.036889505 |
| 327.039997 | 8117.485841 | 0.0001832   | 0.059913841 |
| 327.079997 | 11252.36386 | 0.00025395  | 0.083062024 |
| 327.119997 | 13482.4527  | 0.00030428  | 0.099536131 |
| 327.159997 | 13984.98018 | 0.000315622 | 0.103258737 |
| 327.199997 | 12508.0707  | 0.00028229  | 0.0923652   |
| 327.239997 | 9671.125176 | 0.000218264 | 0.071424653 |
| 327.279997 | 6415.320578 | 0.000144785 | 0.047385185 |
| 327.319997 | 3636.688081 | 8.2075E-05  | 0.026864784 |
| 327.359997 | 1827.67261  | 4.1248E-05  | 0.013502953 |
| 327.399997 | 886.721504  | 2.00121E-05 | 0.006551951 |
| 327.439997 | 522.291452  | 1.17874E-05 | 0.003859663 |
| 327.479997 | 455.096495  | 1.02709E-05 | 0.003363512 |
| 327.519997 | 493.145078  | 1.11296E-05 | 0.003645166 |
| 327.559997 | 533.963287  | 1.20508E-05 | 0.003947363 |
| 327.599997 | 537.88528   | 1.21393E-05 | 0.003976842 |
| 327.639997 | 520.762909  | 1.17529E-05 | 0.003850718 |
| 327.679997 | 430.338989  | 9.71215E-06 | 0.003182478 |
| 327.719997 | 323.359058  | 7.29776E-06 | 0.002391623 |
| 327.759997 | 270.03645   | 6.09435E-06 | 0.001997483 |
| 327.799997 | 279.688235  | 6.31217E-06 | 0.002069131 |
| 327.839997 | 352.091905  | 7.94622E-06 | 0.00260509  |
| 327.879997 | 490.717015  | 1.10748E-05 | 0.003631205 |
| 327.919997 | 730.715865  | 1.64912E-05 | 0.005407807 |
| 327.959997 | 1287.71993  | 2.9062E-05  | 0.009531188 |
| 327.999997 | 2490.337063 | 5.62034E-05 | 0.018434728 |
| 328.039997 | 4228.610428 | 9.54338E-05 | 0.031306119 |
| 328.079997 | 6083.135437 | 0.000137288 | 0.045041412 |
| 328.119997 | 7339.296451 | 0.000165638 | 0.054349041 |
| 328.159997 | 7583.055671 | 0.000171139 | 0.056160975 |
| 328.199997 | 6827.735965 | 0.000154092 | 0.050573155 |
| 328.239997 | 5438.158437 | 0.000122732 | 0.04028544  |
| 328.279997 | 3818.866001 | 8.61865E-05 | 0.028293299 |
| 328.319997 | 2365.67613  | 5.339E-05   | 0.01752901  |
| 328.359997 | 1315.762857 | 2.96949E-05 | 0.009750629 |
| 328.399997 | 726.090316  | 1.63868E-05 | 0.005381441 |
| 328.439997 | 462.117746  | 1.04294E-05 | 0.003425417 |
| 328.479997 | 393.6146    | 8.88333E-06 | 0.002917997 |

|            |             |             |             |
|------------|-------------|-------------|-------------|
| 328.519997 | 436.917313  | 9.86062E-06 | 0.003239409 |
| 328.559997 | 515.469791  | 1.16334E-05 | 0.003822281 |
| 328.599997 | 548.672151  | 1.23828E-05 | 0.004068977 |
| 328.639997 | 516.729887  | 1.16619E-05 | 0.003832558 |
| 328.679997 | 432.620532  | 9.76364E-06 | 0.003209114 |
| 328.719997 | 340.389402  | 7.68211E-06 | 0.002525265 |
| 328.759997 | 278.720461  | 6.29033E-06 | 0.00206801  |
| 328.799997 | 281.823797  | 6.36037E-06 | 0.00209129  |
| 328.839997 | 374.798654  | 8.45868E-06 | 0.002781553 |
| 328.879997 | 616.809374  | 1.39205E-05 | 0.004578183 |
| 328.919997 | 1309.404299 | 2.95514E-05 | 0.009720057 |
| 328.959997 | 2849.924945 | 6.43188E-05 | 0.021158324 |
| 328.999997 | 5551.308091 | 0.000125285 | 0.04121886  |
| 329.039997 | 9282.384254 | 0.00020949  | 0.068930748 |
| 329.079997 | 12965.83023 | 0.000292621 | 0.096295628 |
| 329.119997 | 15254.05407 | 0.000344263 | 0.113303756 |
| 329.159997 | 15308.65327 | 0.000345495 | 0.113723127 |
| 329.199997 | 13274.30011 | 0.000299582 | 0.098622546 |
| 329.239997 | 10099.79574 | 0.000227938 | 0.075046412 |
| 329.279997 | 6704.12888  | 0.000151303 | 0.049821002 |
| 329.319997 | 3866.123284 | 8.7253E-05  | 0.028734163 |
| 329.359997 | 1991.986319 | 4.49564E-05 | 0.014806825 |
| 329.399997 | 975.417749  | 2.20138E-05 | 0.007251352 |
| 329.439997 | 537.742774  | 1.21361E-05 | 0.003998119 |
| 329.479997 | 435.011883  | 9.81761E-06 | 0.003234707 |
| 329.519997 | 486.429202  | 1.0978E-05  | 0.00361748  |
| 329.559997 | 577.021627  | 1.30226E-05 | 0.00429172  |
| 329.599997 | 645.478965  | 1.45676E-05 | 0.004801468 |
| 329.639997 | 605.38268   | 1.36626E-05 | 0.004503754 |
| 329.679997 | 473.864458  | 1.06945E-05 | 0.00352575  |
| 329.719997 | 331.681619  | 7.48559E-06 | 0.002468149 |
| 329.759997 | 251.662538  | 5.67967E-06 | 0.001872929 |
| 329.799997 | 238.190628  | 5.37563E-06 | 0.001772883 |
| 329.839997 | 294.200679  | 6.6397E-06  | 0.002190038 |
| 329.879997 | 444.053297  | 1.00217E-05 | 0.003305947 |
| 329.919997 | 792.729216  | 1.78908E-05 | 0.005902531 |
| 329.959997 | 1523.139043 | 3.43751E-05 | 0.011342417 |
| 329.999997 | 2831.785405 | 6.39095E-05 | 0.021090119 |
| 330.039997 | 4719.393032 | 0.00010651  | 0.035152602 |
| 330.079997 | 6715.470548 | 0.000151559 | 0.050026534 |
| 330.119997 | 8035.365187 | 0.000181347 | 0.059866271 |
| 330.159997 | 8146.320867 | 0.000183851 | 0.060700284 |
| 330.199997 | 7142.870915 | 0.000161205 | 0.053229774 |
| 330.239997 | 5526.728702 | 0.000124731 | 0.041191023 |
| 330.279997 | 3797.354259 | 8.5701E-05  | 0.028305325 |
| 330.319997 | 2288.491125 | 5.16481E-05 | 0.017060386 |

|            |             |             |             |
|------------|-------------|-------------|-------------|
| 330.359997 | 1242.160422 | 2.80338E-05 | 0.009261256 |
| 330.399997 | 677.030012  | 1.52796E-05 | 0.005048388 |
| 330.439997 | 462.257548  | 1.04325E-05 | 0.003447318 |
| 330.479997 | 449.290487  | 1.01399E-05 | 0.003351021 |
| 330.519997 | 532.156972  | 1.201E-05   | 0.003969559 |
| 330.559997 | 629.77954   | 1.42132E-05 | 0.004698331 |
| 330.599997 | 644.957152  | 1.45558E-05 | 0.004812142 |
| 330.639997 | 592.727797  | 1.3377E-05  | 0.004422985 |
| 330.679997 | 498.018935  | 1.12396E-05 | 0.003716709 |
| 330.719997 | 363.818084  | 8.21087E-06 | 0.002715498 |
| 330.759997 | 274.320247  | 6.19103E-06 | 0.002047744 |
| 330.799997 | 252.29056   | 5.69385E-06 | 0.001883524 |
| 330.839997 | 323.349445  | 7.29755E-06 | 0.00241432  |
| 330.879997 | 590.289626  | 1.3322E-05  | 0.004407988 |
| 330.919997 | 1262.639798 | 2.8496E-05  | 0.009429903 |
| 330.959997 | 2820.983966 | 6.36657E-05 | 0.021070793 |
| 330.999997 | 5662.562278 | 0.000127796 | 0.042300523 |
| 331.039997 | 9689.139565 | 0.00021867  | 0.072388643 |
| 331.079997 | 14028.5957  | 0.000316606 | 0.104821869 |
| 331.119997 | 17533.39196 | 0.000395704 | 0.131025585 |
| 331.159997 | 19039.94906 | 0.000429705 | 0.14230115  |
| 331.199997 | 17851.33659 | 0.00040288  | 0.133433789 |
| 331.239997 | 14411.76002 | 0.000325253 | 0.107736919 |
| 331.279997 | 10011.62645 | 0.000225948 | 0.074852206 |
| 331.319997 | 6013.553304 | 0.000135718 | 0.044965929 |
| 331.359997 | 3103.234183 | 7.00357E-05 | 0.02320702  |
| 331.399997 | 1417.068354 | 3.19813E-05 | 0.010598589 |
| 331.439997 | 697.286147  | 1.57368E-05 | 0.005215797 |
| 331.479997 | 489.531308  | 1.1048E-05  | 0.003662204 |
| 331.519997 | 462.522382  | 1.04385E-05 | 0.003460567 |
| 331.559997 | 537.640932  | 1.21338E-05 | 0.004023085 |
| 331.599997 | 625.07957   | 1.41072E-05 | 0.004677939 |
| 331.639997 | 617.457126  | 1.39351E-05 | 0.004621452 |
| 331.679997 | 509.524556  | 1.14993E-05 | 0.003814074 |
| 331.719997 | 362.383786  | 8.1785E-06  | 0.002712971 |
| 331.759997 | 255.643185  | 5.76951E-06 | 0.001914093 |
| 331.799997 | 222.997441  | 5.03274E-06 | 0.001669864 |
| 331.839997 | 278.154315  | 6.27756E-06 | 0.002083144 |
| 331.879997 | 402.094072  | 9.0747E-06  | 0.003011712 |
| 331.919997 | 691.940982  | 1.56161E-05 | 0.005183311 |
| 331.959997 | 1402.635882 | 3.16555E-05 | 0.010508372 |
| 331.999997 | 2808.464307 | 6.33831E-05 | 0.021043198 |
| 332.039997 | 4813.576621 | 0.000108636 | 0.036071404 |
| 332.079997 | 6893.457125 | 0.000155576 | 0.051663586 |
| 332.119997 | 8358.726036 | 0.000188645 | 0.062652712 |
| 332.159997 | 8778.768538 | 0.000198125 | 0.065809059 |

|            |             |             |             |
|------------|-------------|-------------|-------------|
| 332.199997 | 7944.957904 | 0.000179307 | 0.059565663 |
| 332.239997 | 6187.760285 | 0.000139649 | 0.046397027 |
| 332.279997 | 4148.481618 | 9.36255E-05 | 0.031109865 |
| 332.319997 | 2431.220249 | 5.48693E-05 | 0.018234151 |
| 332.359997 | 1285.404524 | 2.90098E-05 | 0.009641694 |
| 332.399997 | 695.222951  | 1.56902E-05 | 0.005215427 |
| 332.439997 | 471.022619  | 1.06303E-05 | 0.003533945 |
| 332.479997 | 441.741571  | 9.96949E-06 | 0.003314657 |
| 332.519997 | 561.812844  | 1.26793E-05 | 0.004216132 |
| 332.559997 | 746.084966  | 1.68381E-05 | 0.005599678 |
| 332.599997 | 835.349577  | 1.88527E-05 | 0.0062704   |
| 332.639997 | 761.538455  | 1.71869E-05 | 0.005717038 |
| 332.679997 | 611.288856  | 1.37959E-05 | 0.004589633 |
| 332.719997 | 429.908417  | 9.70243E-06 | 0.003228194 |
| 332.759997 | 319.648339  | 7.21402E-06 | 0.002400537 |
| 332.799997 | 300.953389  | 6.7921E-06  | 0.00226041  |
| 332.839997 | 378.588358  | 8.54421E-06 | 0.002843855 |
| 332.879997 | 586.34905   | 1.32331E-05 | 0.004405028 |
| 332.919997 | 1013.01626  | 2.28624E-05 | 0.007611339 |
| 332.959997 | 1932.950254 | 4.3624E-05  | 0.014525045 |
| 332.999997 | 3731.811799 | 8.42218E-05 | 0.028045857 |
| 333.039997 | 6325.667214 | 0.000142761 | 0.047545289 |
| 333.079997 | 9190.446242 | 0.000207416 | 0.069085978 |
| 333.119997 | 11503.41922 | 0.000259616 | 0.086483331 |
| 333.159997 | 12511.4324  | 0.000282366 | 0.094072923 |
| 333.199997 | 11888.19118 | 0.0002683   | 0.089397531 |
| 333.239997 | 9739.586055 | 0.000219809 | 0.073249114 |
| 333.279997 | 6802.323953 | 0.000153519 | 0.051164804 |
| 333.319997 | 4083.188014 | 9.21519E-05 | 0.03071606  |
| 333.359997 | 2092.471156 | 4.72242E-05 | 0.015742646 |
| 333.399997 | 980.9009    | 2.21376E-05 | 0.007380665 |
| 333.439997 | 513.562536  | 1.15904E-05 | 0.0038647   |
| 333.479997 | 402.698506  | 9.08834E-06 | 0.003030781 |
| 333.519997 | 470.476455  | 1.0618E-05  | 0.003541315 |
| 333.559997 | 638.327613  | 1.44062E-05 | 0.00480532  |
| 333.599997 | 714.867658  | 1.61336E-05 | 0.005382158 |
| 333.639997 | 670.078593  | 1.51227E-05 | 0.005045551 |
| 333.679997 | 540.243533  | 1.21925E-05 | 0.004068408 |
| 333.719997 | 406.870427  | 9.1825E-06  | 0.003064383 |
| 333.759997 | 313.501733  | 7.0753E-06  | 0.002361451 |
| 333.799997 | 263.448973  | 5.94568E-06 | 0.001984667 |
| 333.839997 | 278.058443  | 6.27539E-06 | 0.002094977 |
| 333.879997 | 384.473253  | 8.67703E-06 | 0.002897085 |
| 333.919997 | 604.34752   | 1.36393E-05 | 0.004554429 |
| 333.959997 | 1043.429129 | 2.35487E-05 | 0.007864338 |
| 333.999997 | 1897.821631 | 4.28312E-05 | 0.014305618 |

|            |             |             |             |
|------------|-------------|-------------|-------------|
| 334.039997 | 3255.887153 | 7.34808E-05 | 0.024545539 |
| 334.079997 | 4835.772345 | 0.000109137 | 0.03646037  |
| 334.119997 | 6122.561268 | 0.000138178 | 0.046167926 |
| 334.159997 | 6585.419448 | 0.000148624 | 0.04966411  |
| 334.199997 | 6126.386459 | 0.000138264 | 0.046207831 |
| 334.239997 | 4998.101286 | 0.0001128   | 0.037702333 |
| 334.279997 | 3510.999156 | 7.92384E-05 | 0.026487799 |
| 334.319997 | 2084.929684 | 4.7054E-05  | 0.015731079 |
| 334.359997 | 1098.652434 | 2.47951E-05 | 0.008290475 |
| 334.399997 | 589.956724  | 1.33145E-05 | 0.004452369 |
| 334.439997 | 387.165093  | 8.73778E-06 | 0.002922262 |
| 334.479997 | 359.639191  | 8.11656E-06 | 0.002714825 |
| 334.519997 | 445.839001  | 1.0062E-05  | 0.003365929 |
| 334.559997 | 541.922329  | 1.22304E-05 | 0.004091813 |
| 334.599997 | 568.799685  | 1.2837E-05  | 0.004295266 |
| 334.639997 | 543.750076  | 1.22717E-05 | 0.004106596 |
| 334.679997 | 467.101712  | 1.05418E-05 | 0.003528141 |
| 334.719997 | 356.546308  | 8.04675E-06 | 0.002693409 |
| 334.759997 | 266.970049  | 6.02514E-06 | 0.002016977 |
| 334.799997 | 251.573377  | 5.67766E-06 | 0.001900881 |
| 334.839997 | 310.522692  | 7.00806E-06 | 0.00234658  |
| 334.879997 | 467.45924   | 1.05499E-05 | 0.003532952 |
| 334.919997 | 842.902159  | 1.90231E-05 | 0.006371226 |
| 334.959997 | 1651.884359 | 3.72807E-05 | 0.012487553 |
| 334.999997 | 3218.543058 | 7.2638E-05  | 0.024333741 |
| 335.039997 | 5561.102525 | 0.000125506 | 0.042049643 |
| 335.079997 | 8167.806369 | 0.000184336 | 0.061767311 |
| 335.119997 | 10454.09892 | 0.000235934 | 0.079066353 |
| 335.159997 | 11862.09527 | 0.000267711 | 0.089726007 |
| 335.199997 | 11896.48052 | 0.000268487 | 0.08999684  |
| 335.239997 | 10467.49038 | 0.000236237 | 0.079195983 |
| 335.279997 | 7943.734821 | 0.000179279 | 0.060108673 |
| 335.319997 | 5206.994455 | 0.000117515 | 0.039404999 |
| 335.359997 | 2960.70438  | 6.6819E-05  | 0.022408411 |
| 335.399997 | 1497.993176 | 3.38076E-05 | 0.011339075 |
| 335.439997 | 745.974517  | 1.68356E-05 | 0.005647336 |
| 335.479997 | 471.586129  | 1.0643E-05  | 0.003570528 |
| 335.519997 | 446.747215  | 1.00825E-05 | 0.003382868 |
| 335.559997 | 523.380491  | 1.1812E-05  | 0.003963624 |
| 335.599997 | 564.125941  | 1.27315E-05 | 0.004272704 |
| 335.639997 | 570.614286  | 1.2878E-05  | 0.004322362 |
| 335.679997 | 510.733377  | 1.15265E-05 | 0.003869229 |
| 335.719997 | 395.986495  | 8.93686E-06 | 0.003000284 |
| 335.759997 | 299.050262  | 6.74915E-06 | 0.002266094 |
| 335.799997 | 274.598316  | 6.1973E-06  | 0.002081054 |
| 335.839997 | 317.354778  | 7.16226E-06 | 0.002405372 |

|            |             |             |             |
|------------|-------------|-------------|-------------|
| 335.879997 | 465.24888   | 1.05E-05    | 0.003526746 |
| 335.919997 | 794.773006  | 1.79369E-05 | 0.00602537  |
| 335.959997 | 1482.875059 | 3.34664E-05 | 0.01124338  |
| 335.999997 | 2858.818836 | 6.45196E-05 | 0.021678572 |
| 336.039997 | 5181.951347 | 0.000116949 | 0.039299684 |
| 336.079997 | 7962.671352 | 0.000179706 | 0.060395727 |
| 336.119997 | 10130.2363  | 0.000228625 | 0.076845543 |
| 336.159997 | 10777.81709 | 0.00024324  | 0.081767665 |
| 336.199997 | 9715.181088 | 0.000219258 | 0.073714574 |
| 336.239997 | 7587.704802 | 0.000171244 | 0.057579058 |
| 336.279997 | 5113.276566 | 0.0001154   | 0.038806554 |
| 336.319997 | 3001.752918 | 6.77454E-05 | 0.022784127 |
| 336.359997 | 1585.503184 | 3.57826E-05 | 0.012035835 |
| 336.399997 | 804.705356  | 1.81611E-05 | 0.006109387 |
| 336.439997 | 498.62787   | 1.12533E-05 | 0.003786072 |
| 336.479997 | 415.480229  | 9.37681E-06 | 0.003155109 |
| 336.519997 | 466.375249  | 1.05254E-05 | 0.003542021 |
| 336.559997 | 546.5499    | 1.23349E-05 | 0.004151424 |
| 336.599997 | 582.324691  | 1.31423E-05 | 0.004423684 |
| 336.639997 | 572.565989  | 1.2922E-05  | 0.004350068 |
| 336.679997 | 460.135692  | 1.03846E-05 | 0.003496294 |
| 336.719997 | 323.4022    | 7.29874E-06 | 0.002457631 |
| 336.759997 | 246.088627  | 5.55388E-06 | 0.001870324 |
| 336.799997 | 241.542686  | 5.45128E-06 | 0.001835992 |
| 336.839997 | 317.898449  | 7.17453E-06 | 0.002416667 |
| 336.879997 | 556.259937  | 1.2554E-05  | 0.004229196 |
| 336.919997 | 1108.61408  | 2.50199E-05 | 0.008429696 |
| 336.959997 | 2271.053621 | 5.12545E-05 | 0.017270722 |
| 336.999997 | 4344.183437 | 9.80422E-05 | 0.033040211 |
| 337.039997 | 7054.250347 | 0.000159205 | 0.053658319 |
| 337.079997 | 9653.558595 | 0.000217867 | 0.073438733 |
| 337.119997 | 11252.70626 | 0.000253958 | 0.085614289 |
| 337.159997 | 11348.76091 | 0.000256126 | 0.086355349 |
| 337.199997 | 9997.544504 | 0.000225631 | 0.076082656 |
| 337.239997 | 7839.902479 | 0.000176936 | 0.059669788 |
| 337.279997 | 5456.113774 | 0.000123137 | 0.041531609 |
| 337.319997 | 3362.835981 | 7.58945E-05 | 0.025600741 |
| 337.359997 | 1847.383789 | 4.16929E-05 | 0.01406551  |
| 337.399997 | 962.997039  | 2.17335E-05 | 0.007332883 |
| 337.439997 | 559.071012  | 1.26175E-05 | 0.004257634 |
| 337.479997 | 458.065931  | 1.03379E-05 | 0.003488838 |
| 337.519997 | 532.335696  | 1.20141E-05 | 0.004054991 |
| 337.559997 | 619.885031  | 1.39899E-05 | 0.004722445 |
| 337.599997 | 643.376638  | 1.45201E-05 | 0.004901991 |
| 337.639997 | 626.630143  | 1.41422E-05 | 0.004774962 |
| 337.679997 | 573.398462  | 1.29408E-05 | 0.004369851 |

|            |             |             |             |
|------------|-------------|-------------|-------------|
| 337.719997 | 518.105075  | 1.16929E-05 | 0.003948929 |
| 337.759997 | 463.934641  | 1.04704E-05 | 0.003536468 |
| 337.799997 | 422.771766  | 9.54137E-06 | 0.003223075 |
| 337.839997 | 442.358661  | 9.98342E-06 | 0.003372798 |
| 337.879997 | 565.381647  | 1.27599E-05 | 0.004311307 |
| 337.919997 | 832.373323  | 1.87855E-05 | 0.006347998 |
| 337.959997 | 1379.541685 | 3.11343E-05 | 0.01052216  |
| 337.999997 | 2410.096913 | 5.43925E-05 | 0.018384675 |
| 338.039997 | 3901.366026 | 8.80484E-05 | 0.02976388  |
| 338.079997 | 5598.782323 | 0.000126357 | 0.042718679 |
| 338.119997 | 6910.959035 | 0.000155971 | 0.052736819 |
| 338.159997 | 7204.112046 | 0.000162587 | 0.054980343 |
| 338.199997 | 6408.481928 | 0.000144631 | 0.048914038 |
| 338.239997 | 5004.241631 | 0.000112939 | 0.038200407 |
| 338.279997 | 3496.124374 | 7.89027E-05 | 0.026691191 |
| 338.319997 | 2273.238547 | 5.13038E-05 | 0.017357111 |
| 338.359997 | 1443.017633 | 3.25669E-05 | 0.011019336 |
| 338.399997 | 950.001153  | 2.14402E-05 | 0.007255365 |
| 338.439997 | 664.50924   | 1.4997E-05  | 0.005075601 |
| 338.479997 | 520.887131  | 1.17557E-05 | 0.003979068 |
| 338.519997 | 491.898492  | 1.11015E-05 | 0.003758067 |
| 338.559997 | 582.952259  | 1.31564E-05 | 0.004454238 |
| 338.599997 | 688.602926  | 1.55408E-05 | 0.005262118 |
| 338.639997 | 657.519852  | 1.48393E-05 | 0.005025183 |
| 338.679997 | 530.934747  | 1.19825E-05 | 0.004058219 |
| 338.719997 | 401.767676  | 9.06734E-06 | 0.003071288 |
| 338.759997 | 319.173257  | 7.2033E-06  | 0.002440188 |
| 338.799997 | 305.588734  | 6.89671E-06 | 0.002336606 |
| 338.839997 | 400.005409  | 9.02756E-06 | 0.0030589   |
| 338.879997 | 710.165645  | 1.60274E-05 | 0.005431382 |
| 338.919997 | 1446.767891 | 3.26515E-05 | 0.011066259 |
| 338.959997 | 2980.034507 | 6.72552E-05 | 0.022796832 |
| 338.999997 | 5607.657734 | 0.000126557 | 0.042902831 |
| 339.039997 | 8962.669648 | 0.000202275 | 0.068579305 |
| 339.079997 | 12189.74743 | 0.000275106 | 0.093282813 |
| 339.119997 | 14037.20958 | 0.0003168   | 0.107433306 |
| 339.159997 | 13740.71146 | 0.000310109 | 0.105176472 |
| 339.199997 | 11618.49034 | 0.000262213 | 0.088942698 |
| 339.239997 | 8578.094291 | 0.000193596 | 0.065675384 |
| 339.279997 | 5658.189462 | 0.000127697 | 0.043325192 |
| 339.319997 | 3412.333647 | 7.70116E-05 | 0.026131582 |
| 339.359997 | 1950.803239 | 4.40269E-05 | 0.014940973 |
| 339.399997 | 1103.950526 | 2.49146E-05 | 0.008456024 |
| 339.439997 | 679.35495   | 1.53321E-05 | 0.005204326 |
| 339.479997 | 533.255442  | 1.20348E-05 | 0.004085585 |
| 339.519997 | 559.056685  | 1.26171E-05 | 0.004283768 |



|            |             |             |             |
|------------|-------------|-------------|-------------|
| 339.559997 | 645.931094  | 1.45778E-05 | 0.004950026 |
| 339.599997 | 701.558712  | 1.58332E-05 | 0.005376956 |
| 339.639997 | 647.517488  | 1.46136E-05 | 0.004963352 |
| 339.679997 | 496.700137  | 1.12098E-05 | 0.003807755 |
| 339.719997 | 364.084429  | 8.21688E-06 | 0.002791438 |
| 339.759997 | 298.854439  | 6.74473E-06 | 0.002291589 |
| 339.799997 | 259.707516  | 5.86124E-06 | 0.001991648 |
| 339.839997 | 292.860837  | 6.60946E-06 | 0.002246159 |
| 339.879997 | 420.992965  | 9.50122E-06 | 0.003229276 |
| 339.919997 | 654.820954  | 1.47784E-05 | 0.005023473 |
| 339.959997 | 1188.920096 | 2.68323E-05 | 0.009121899 |
| 339.999997 | 2282.293268 | 5.15082E-05 | 0.017512781 |
| 340.039997 | 3875.07965  | 8.74552E-05 | 0.029738249 |
| 340.079997 | 5538.141444 | 0.000124988 | 0.042505966 |
| 340.119997 | 6734.058879 | 0.000151978 | 0.051690869 |
| 340.159997 | 6929.869138 | 0.000156397 | 0.053200171 |
| 340.199997 | 6125.146806 | 0.000138236 | 0.047027898 |
| 340.239997 | 4755.343085 | 0.000107321 | 0.036515057 |
| 340.279997 | 3258.944243 | 7.35498E-05 | 0.025027537 |
| 340.319997 | 1994.354479 | 4.50098E-05 | 0.015317736 |
| 340.359997 | 1125.800784 | 2.54078E-05 | 0.008647784 |
| 340.399997 | 641.596045  | 1.44799E-05 | 0.004928968 |
| 340.439997 | 429.411933  | 9.69123E-06 | 0.003299282 |
| 340.479997 | 361.694962  | 8.16295E-06 | 0.002779322 |
| 340.519997 | 413.807817  | 9.33907E-06 | 0.003180139 |
| 340.559997 | 482.178241  | 1.08821E-05 | 0.003706005 |
| 340.599997 | 541.580249  | 1.22227E-05 | 0.004163056 |
| 340.639997 | 555.418023  | 1.2535E-05  | 0.004269926 |
| 340.679997 | 481.824377  | 1.08741E-05 | 0.00370459  |
| 340.719997 | 373.578818  | 8.43115E-06 | 0.002872663 |
| 340.759997 | 290.250883  | 6.55056E-06 | 0.002232168 |
| 340.799997 | 282.956716  | 6.38594E-06 | 0.002176328 |
| 340.839997 | 353.030244  | 7.9674E-06  | 0.002715609 |
| 340.879997 | 554.893551  | 1.25232E-05 | 0.0042689   |
| 340.919997 | 1063.089657 | 2.39925E-05 | 0.008179507 |
| 340.959997 | 2218.664455 | 5.00722E-05 | 0.017072606 |
| 340.999997 | 4193.44741  | 9.46403E-05 | 0.032272331 |
| 341.039997 | 6699.717121 | 0.000151203 | 0.051566367 |
| 341.079997 | 9200.632465 | 0.000207645 | 0.070823713 |
| 341.119997 | 10758.88652 | 0.000242813 | 0.082828398 |
| 341.159997 | 10802.84556 | 0.000243805 | 0.083176573 |
| 341.199997 | 9402.886094 | 0.00021221  | 0.072406066 |
| 341.239997 | 7054.624233 | 0.000159213 | 0.054329858 |
| 341.279997 | 4620.631355 | 0.000104281 | 0.035589092 |
| 341.319997 | 2667.095185 | 6.01926E-05 | 0.020544946 |
| 341.359997 | 1417.564843 | 3.19925E-05 | 0.010920947 |

|            |             |             |             |
|------------|-------------|-------------|-------------|
| 341.399997 | 739.253638  | 1.66839E-05 | 0.005695892 |
| 341.439997 | 421.509168  | 9.51287E-06 | 0.003248076 |
| 341.479997 | 346.831227  | 7.8275E-06  | 0.002672934 |
| 341.519997 | 406.311367  | 9.16988E-06 | 0.003131698 |
| 341.559997 | 499.380547  | 1.12703E-05 | 0.003849492 |
| 341.599997 | 555.66193   | 1.25405E-05 | 0.00428384  |
| 341.639997 | 543.355299  | 1.22628E-05 | 0.004189453 |
| 341.679997 | 474.405973  | 1.07067E-05 | 0.003658259 |
| 341.719997 | 366.751138  | 8.27706E-06 | 0.002828438 |
| 341.759997 | 289.875742  | 6.54209E-06 | 0.002235825 |
| 341.799997 | 274.704717  | 6.1997E-06  | 0.002119058 |
| 341.839997 | 314.02229   | 7.08705E-06 | 0.002422636 |
| 341.879997 | 414.245368  | 9.34894E-06 | 0.003196216 |
| 341.919997 | 660.356712  | 1.49033E-05 | 0.005095747 |
| 341.959997 | 1287.833057 | 2.90646E-05 | 0.00993893  |
| 341.999997 | 2495.137912 | 5.63118E-05 | 0.019258631 |
| 342.039997 | 4190.757135 | 9.45796E-05 | 0.032349989 |
| 342.079997 | 6037.272301 | 0.000136253 | 0.046609367 |
| 342.119997 | 7300.493797 | 0.000164762 | 0.056368367 |
| 342.159997 | 7546.392994 | 0.000170312 | 0.058273809 |
| 342.199997 | 6729.897446 | 0.000151884 | 0.051974845 |
| 342.239997 | 5146.003404 | 0.000116138 | 0.039747113 |
| 342.279997 | 3424.649772 | 7.72896E-05 | 0.026454676 |
| 342.319997 | 2035.297928 | 4.59338E-05 | 0.015724072 |
| 342.359997 | 1115.161619 | 2.51676E-05 | 0.008616395 |
| 342.399997 | 629.496105  | 1.42069E-05 | 0.004864425 |
| 342.439997 | 428.520199  | 9.6711E-06  | 0.003311773 |
| 342.479997 | 397.775128  | 8.97723E-06 | 0.003074522 |
| 342.519997 | 463.36341   | 1.04575E-05 | 0.003581891 |
| 342.559997 | 561.147744  | 1.26643E-05 | 0.00433829  |
| 342.599997 | 586.203561  | 1.32298E-05 | 0.004532529 |
| 342.639997 | 565.77186   | 1.27687E-05 | 0.004375061 |
| 342.679997 | 515.103259  | 1.16252E-05 | 0.003983711 |
| 342.719997 | 412.120605  | 9.30099E-06 | 0.003187635 |
| 342.759997 | 326.335558  | 7.36494E-06 | 0.002524406 |
| 342.799997 | 301.64015   | 6.8076E-06  | 0.002333645 |
| 342.839997 | 351.892919  | 7.94173E-06 | 0.002722744 |
| 342.879997 | 568.274344  | 1.28252E-05 | 0.004397491 |
| 342.919997 | 1127.146382 | 2.54381E-05 | 0.008723241 |
| 342.959997 | 2335.046029 | 5.26987E-05 | 0.018073558 |
| 342.999997 | 4483.128048 | 0.000101178 | 0.034704038 |
| 343.039997 | 7550.257435 | 0.000170399 | 0.058453602 |
| 343.079997 | 10695.2274  | 0.000241376 | 0.082811409 |
| 343.119997 | 12668.67936 | 0.000285914 | 0.098102964 |
| 343.159997 | 12819.77113 | 0.000289324 | 0.099284553 |
| 343.199997 | 11133.79094 | 0.000251274 | 0.086237289 |

|            |             |             |             |
|------------|-------------|-------------|-------------|
| 343.239997 | 8327.084489 | 0.000187931 | 0.064505332 |
| 343.279997 | 5407.023261 | 0.000122029 | 0.041890109 |
| 343.319997 | 3013.210649 | 6.8004E-05  | 0.023347122 |
| 343.359997 | 1482.164008 | 3.34504E-05 | 0.011485521 |
| 343.399997 | 714.794522  | 1.61319E-05 | 0.0055397   |
| 343.439997 | 426.136041  | 9.6173E-06  | 0.003302964 |
| 343.479997 | 368.587227  | 8.3185E-06  | 0.002857238 |
| 343.519997 | 445.605904  | 1.00567E-05 | 0.003454679 |
| 343.559997 | 526.469796  | 1.18817E-05 | 0.004082073 |
| 343.599997 | 573.608169  | 1.29455E-05 | 0.004448087 |
| 343.639997 | 568.053182  | 1.28202E-05 | 0.004405523 |
| 343.679997 | 474.109388  | 1.07E-05    | 0.003677372 |
| 343.719997 | 366.403145  | 8.26921E-06 | 0.002842292 |
| 343.759997 | 286.181636  | 6.45872E-06 | 0.00222025  |
| 343.799997 | 243.576496  | 5.49718E-06 | 0.001889931 |
| 343.839997 | 278.158019  | 6.27764E-06 | 0.002158503 |
| 343.879997 | 397.156493  | 8.96327E-06 | 0.003082289 |
| 343.919997 | 659.734193  | 1.48893E-05 | 0.005120722 |
| 343.959997 | 1273.31911  | 2.8737E-05  | 0.009884392 |
| 343.999997 | 2348.775573 | 5.30086E-05 | 0.018234956 |
| 344.039997 | 3937.23986  | 8.8858E-05  | 0.030570713 |
| 344.079997 | 5790.509139 | 0.000130684 | 0.044965656 |
| 344.119997 | 7080.529985 | 0.000159798 | 0.054989584 |
| 344.159997 | 7260.462798 | 0.000163859 | 0.056393552 |
| 344.199997 | 6455.592047 | 0.000145694 | 0.050147778 |
| 344.239997 | 5026.129171 | 0.000113433 | 0.039048084 |
| 344.279997 | 3440.073173 | 7.76377E-05 | 0.026729093 |
| 344.319997 | 2095.93208  | 4.73023E-05 | 0.016287117 |
| 344.359997 | 1155.015867 | 2.60671E-05 | 0.008976466 |
| 344.399997 | 621.598309  | 1.40286E-05 | 0.004831453 |
| 344.439997 | 396.744883  | 8.95398E-06 | 0.003084109 |
| 344.479997 | 371.501581  | 8.38427E-06 | 0.002888214 |
| 344.519997 | 508.537303  | 1.1477E-05  | 0.003954049 |
| 344.559997 | 686.971642  | 1.5504E-05  | 0.005342056 |
| 344.599997 | 777.904891  | 1.75562E-05 | 0.006049877 |
| 344.639997 | 700.763579  | 1.58153E-05 | 0.00545057  |
| 344.679997 | 541.799369  | 1.22277E-05 | 0.004214629 |
| 344.719997 | 407.314785  | 9.19253E-06 | 0.003168848 |
| 344.759997 | 305.225403  | 6.88851E-06 | 0.002374883 |
| 344.799997 | 267.248347  | 6.03142E-06 | 0.002079635 |
| 344.839997 | 328.361872  | 7.41067E-06 | 0.002555495 |
| 344.879997 | 568.40659   | 1.28281E-05 | 0.004424171 |
| 344.919997 | 1296.204213 | 2.92535E-05 | 0.010090125 |
| 344.959997 | 3121.005465 | 7.04367E-05 | 0.02429786  |
| 344.999997 | 6459.915722 | 0.000145791 | 0.050297998 |
| 345.039997 | 11301.83178 | 0.000255067 | 0.088008179 |

|            |             |             |             |
|------------|-------------|-------------|-------------|
| 345.079997 | 16768.01489 | 0.000378431 | 0.130588879 |
| 345.119997 | 21053.01774 | 0.000475137 | 0.163979379 |
| 345.159997 | 22529.71319 | 0.000508464 | 0.175501517 |
| 345.199997 | 20647.22299 | 0.000465979 | 0.160855971 |
| 345.239997 | 16083.03379 | 0.000362972 | 0.125312339 |
| 345.279997 | 10624.99925 | 0.000239791 | 0.082795186 |
| 345.319997 | 5974.291243 | 0.000134831 | 0.04655999  |
| 345.359997 | 2933.278094 | 6.62E-05    | 0.022862832 |
| 345.399997 | 1311.832906 | 2.96062E-05 | 0.010225996 |
| 345.439997 | 635.66106   | 1.4346E-05  | 0.004955677 |
| 345.479997 | 483.558328  | 1.09132E-05 | 0.003770305 |
| 345.519997 | 541.336032  | 1.22172E-05 | 0.004221287 |
| 345.559997 | 696.331726  | 1.57152E-05 | 0.005430557 |
| 345.599997 | 797.997107  | 1.80097E-05 | 0.006224146 |
| 345.639997 | 761.701834  | 1.71905E-05 | 0.005941741 |
| 345.679997 | 623.07489   | 1.40619E-05 | 0.004860929 |
| 345.719997 | 463.554912  | 1.04618E-05 | 0.00361685  |
| 345.759997 | 336.186476  | 7.58726E-06 | 0.002623371 |
| 345.799997 | 277.008597  | 6.2517E-06  | 0.002161837 |
| 345.839997 | 294.486602  | 6.64615E-06 | 0.002298505 |
| 345.879997 | 439.466977  | 9.91816E-06 | 0.003430492 |
| 345.919997 | 806.138219  | 1.81934E-05 | 0.006293467 |
| 345.959997 | 1546.775836 | 3.49086E-05 | 0.012076971 |
| 345.999997 | 2944.530876 | 6.6454E-05  | 0.02299307  |
| 346.039997 | 4951.200193 | 0.000111742 | 0.038667095 |
| 346.079997 | 7091.628513 | 0.000160048 | 0.055389473 |
| 346.119997 | 8751.065357 | 0.000197499 | 0.068358476 |
| 346.159997 | 9357.113975 | 0.000211177 | 0.07310104  |
| 346.199997 | 8603.158104 | 0.000194161 | 0.06721864  |
| 346.239997 | 6824.750725 | 0.000154025 | 0.053329656 |
| 346.279997 | 4804.979994 | 0.000108442 | 0.037551194 |
| 346.319997 | 2958.421461 | 6.67675E-05 | 0.023122904 |
| 346.359997 | 1592.941863 | 3.59505E-05 | 0.012451808 |
| 346.399997 | 799.569991  | 1.80452E-05 | 0.006250851 |
| 346.439997 | 446.544251  | 1.00779E-05 | 0.003491381 |
| 346.479997 | 361.006685  | 8.14742E-06 | 0.002822917 |
| 346.519997 | 423.050946  | 9.54767E-06 | 0.003308459 |
| 346.559997 | 555.419419  | 1.2535E-05  | 0.004344144 |
| 346.599997 | 641.805366  | 1.44847E-05 | 0.005020381 |
| 346.639997 | 606.929384  | 1.36976E-05 | 0.004748119 |
| 346.679997 | 487.620318  | 1.10049E-05 | 0.003815183 |
| 346.719997 | 360.947789  | 8.14609E-06 | 0.002824412 |
| 346.759997 | 288.750511  | 6.5167E-06  | 0.00225973  |
| 346.799997 | 311.668784  | 7.03393E-06 | 0.002439367 |
| 346.839997 | 458.777215  | 1.0354E-05  | 0.003591168 |
| 346.879997 | 746.850406  | 1.68554E-05 | 0.005846792 |

|            |             |             |             |
|------------|-------------|-------------|-------------|
| 346.919997 | 1239.96357  | 2.79843E-05 | 0.009708296 |
| 346.959997 | 2307.060675 | 5.20671E-05 | 0.018065217 |
| 346.999997 | 4351.320831 | 9.82033E-05 | 0.034076528 |
| 347.039997 | 7403.778366 | 0.000167093 | 0.057987942 |
| 347.079997 | 10700.9449  | 0.000241505 | 0.083821701 |
| 347.119997 | 13332.34556 | 0.000300892 | 0.104445793 |
| 347.159997 | 14426.62885 | 0.000325589 | 0.113031448 |
| 347.199997 | 13340.34138 | 0.000301073 | 0.104532518 |
| 347.239997 | 10588.64158 | 0.000238971 | 0.082980252 |
| 347.279997 | 7167.14374  | 0.000161752 | 0.056173391 |
| 347.319997 | 4102.904601 | 9.25968E-05 | 0.032160735 |
| 347.359997 | 2026.434202 | 4.57338E-05 | 0.015886092 |
| 347.399997 | 919.982361  | 2.07627E-05 | 0.007212969 |
| 347.439997 | 480.776437  | 1.08505E-05 | 0.003769882 |
| 347.479997 | 370.26936   | 8.35646E-06 | 0.002903704 |
| 347.519997 | 387.226298  | 8.73916E-06 | 0.003037032 |
| 347.559997 | 459.242232  | 1.03645E-05 | 0.003602271 |
| 347.599997 | 507.147593  | 1.14456E-05 | 0.003978496 |
| 347.639997 | 520.062735  | 1.17371E-05 | 0.004080282 |
| 347.679997 | 484.764689  | 1.09405E-05 | 0.00380378  |
| 347.719997 | 391.302688  | 8.83116E-06 | 0.00307077  |
| 347.759997 | 325.997237  | 7.3573E-06  | 0.002558576 |
| 347.799997 | 298.64441   | 6.73999E-06 | 0.002344168 |
| 347.839997 | 313.840464  | 7.08294E-06 | 0.002463731 |
| 347.879997 | 390.038334  | 8.80262E-06 | 0.003062256 |
| 347.919997 | 603.425293  | 1.36185E-05 | 0.004738137 |
| 347.959997 | 1102.829367 | 2.48893E-05 | 0.008660489 |
| 347.999997 | 2050.787495 | 4.62834E-05 | 0.016106629 |
| 348.039997 | 3405.266388 | 7.68521E-05 | 0.026747611 |
| 348.079997 | 4943.122562 | 0.000111559 | 0.038831592 |
| 348.119997 | 6239.439298 | 0.000140815 | 0.049020675 |
| 348.159997 | 6774.111599 | 0.000152882 | 0.053227488 |
| 348.199997 | 6267.680738 | 0.000141453 | 0.049253873 |
| 348.239997 | 4951.125424 | 0.00011174  | 0.038912339 |
| 348.279997 | 3448.399552 | 7.78256E-05 | 0.027105091 |
| 348.319997 | 2108.62455  | 4.75887E-05 | 0.016576102 |
| 348.359997 | 1132.171402 | 2.55515E-05 | 0.008901131 |
| 348.399997 | 594.843079  | 1.34248E-05 | 0.004677193 |
| 348.439997 | 362.30687   | 8.17676E-06 | 0.002849111 |
| 348.479997 | 310.464586  | 7.00675E-06 | 0.002441713 |
| 348.519997 | 353.037582  | 7.96757E-06 | 0.002776856 |
| 348.559997 | 448.679954  | 1.01261E-05 | 0.003529547 |
| 348.599997 | 528.887264  | 1.19362E-05 | 0.004160976 |
| 348.639997 | 563.955231  | 1.27277E-05 | 0.00443738  |
| 348.679997 | 526.756563  | 1.18882E-05 | 0.004145164 |
| 348.719997 | 420.788743  | 9.49662E-06 | 0.00331166  |

|            |             |             |             |
|------------|-------------|-------------|-------------|
| 348.759997 | 318.648362  | 7.19145E-06 | 0.00250809  |
| 348.799997 | 281.748714  | 6.35868E-06 | 0.002217906 |
| 348.839997 | 339.349602  | 7.65865E-06 | 0.002671643 |
| 348.879997 | 513.789669  | 1.15955E-05 | 0.004045444 |
| 348.919997 | 897.679194  | 2.02594E-05 | 0.007068899 |
| 348.959997 | 1695.916888 | 3.82745E-05 | 0.013356263 |
| 348.999997 | 3219.232357 | 7.26536E-05 | 0.025356103 |
| 349.039997 | 5819.825103 | 0.000131345 | 0.045844779 |
| 349.079997 | 9231.456693 | 0.000208341 | 0.072727717 |
| 349.119997 | 12523.06249 | 0.000282628 | 0.098671113 |
| 349.159997 | 14853.10018 | 0.000335214 | 0.117043243 |
| 349.199997 | 15276.05721 | 0.000344759 | 0.120389958 |
| 349.239997 | 13342.38749 | 0.000301119 | 0.105162834 |
| 349.279997 | 9826.271086 | 0.000221765 | 0.077458166 |
| 349.319997 | 6090.715845 | 0.000137459 | 0.048017168 |
| 349.359997 | 3188.017925 | 7.19491E-05 | 0.025136146 |
| 349.399997 | 1470.791137 | 3.31937E-05 | 0.011597881 |
| 349.439997 | 670.506072  | 1.51324E-05 | 0.005287862 |
| 349.479997 | 422.51502   | 9.53558E-06 | 0.003332493 |
| 349.519997 | 440.205403  | 9.93482E-06 | 0.003472419 |
| 349.559997 | 513.081553  | 1.15795E-05 | 0.004047743 |
| 349.599997 | 566.635411  | 1.27882E-05 | 0.004470745 |
| 349.639997 | 594.533949  | 1.34178E-05 | 0.004691401 |
| 349.679997 | 575.495602  | 1.29881E-05 | 0.004541691 |
| 349.719997 | 475.175031  | 1.0724E-05  | 0.003750411 |
| 349.759997 | 355.205517  | 8.01649E-06 | 0.002803849 |
| 349.799997 | 285.567995  | 6.44487E-06 | 0.002254416 |
| 349.839997 | 274.97839   | 6.20588E-06 | 0.002171065 |
| 349.879997 | 342.199338  | 7.72296E-06 | 0.00270211  |
| 349.919997 | 530.222365  | 1.19664E-05 | 0.004187276 |
| 349.959997 | 976.733802  | 2.20435E-05 | 0.007714351 |
| 349.999997 | 1801.927484 | 4.0667E-05  | 0.014233448 |
| 350.039997 | 3146.017636 | 7.10012E-05 | 0.024853272 |
| 350.079997 | 4820.614182 | 0.000108795 | 0.038086795 |
| 350.119997 | 6364.967747 | 0.000143648 | 0.050294197 |
| 350.159997 | 7298.973936 | 0.000164728 | 0.057681042 |
| 350.199997 | 7161.65977  | 0.000161629 | 0.056602365 |
| 350.239997 | 6017.145562 | 0.000135799 | 0.047562099 |
| 350.279997 | 4217.509748 | 9.51833E-05 | 0.033340813 |
| 350.319997 | 2473.707386 | 5.58281E-05 | 0.01955771  |
| 350.359997 | 1285.991525 | 2.9023E-05  | 0.010168511 |
| 350.399997 | 651.958566  | 1.47138E-05 | 0.005155714 |
| 350.439997 | 388.925647  | 8.77751E-06 | 0.003075991 |
| 350.479997 | 335.085099  | 7.5624E-06  | 0.002650471 |
| 350.519997 | 366.980603  | 8.28224E-06 | 0.002903091 |
| 350.559997 | 443.801716  | 1.0016E-05  | 0.003511204 |

|            |             |             |             |
|------------|-------------|-------------|-------------|
| 350.599997 | 527.674611  | 1.19089E-05 | 0.004175254 |
| 350.639997 | 590.121932  | 1.33182E-05 | 0.004669904 |
| 350.679997 | 591.110505  | 1.33405E-05 | 0.004678261 |
| 350.719997 | 504.013261  | 1.13749E-05 | 0.003989397 |
| 350.759997 | 397.660862  | 8.97465E-06 | 0.003147949 |
| 350.799997 | 350.791676  | 7.91688E-06 | 0.002777241 |
| 350.839997 | 376.627776  | 8.49996E-06 | 0.002982127 |
| 350.879997 | 502.015811  | 1.13298E-05 | 0.003975399 |
| 350.919997 | 854.627257  | 1.92877E-05 | 0.006768456 |
| 350.959997 | 1678.743152 | 3.78869E-05 | 0.013296784 |
| 350.999997 | 3243.568325 | 7.32028E-05 | 0.025694189 |
| 351.039997 | 5752.423648 | 0.000129824 | 0.045573483 |
| 351.079997 | 9007.090329 | 0.000203277 | 0.071366658 |
| 351.119997 | 12324.76948 | 0.000278153 | 0.097665038 |
| 351.159997 | 14544.86518 | 0.000328257 | 0.115270849 |
| 351.199997 | 14853.28422 | 0.000335218 | 0.117728538 |
| 351.239997 | 13199.29852 | 0.00029789  | 0.104630806 |
| 351.279997 | 10066.308   | 0.000227183 | 0.079804686 |
| 351.319997 | 6516.446268 | 0.000147067 | 0.051667619 |
| 351.359997 | 3559.419008 | 8.03311E-05 | 0.028225145 |
| 351.399997 | 1667.487169 | 3.76329E-05 | 0.013224188 |
| 351.439997 | 732.601122  | 1.65338E-05 | 0.005810634 |
| 351.479997 | 416.401698  | 9.39761E-06 | 0.003303071 |
| 351.519997 | 398.174115  | 8.98624E-06 | 0.003158841 |
| 351.559997 | 499.640949  | 1.12762E-05 | 0.003964261 |
| 351.599997 | 586.421025  | 1.32347E-05 | 0.004653322 |
| 351.639997 | 605.191721  | 1.36583E-05 | 0.004802817 |
| 351.679997 | 543.740594  | 1.22715E-05 | 0.00431563  |
| 351.719997 | 429.839141  | 9.70087E-06 | 0.00341199  |
| 351.759997 | 339.723056  | 7.66708E-06 | 0.002696971 |
| 351.799997 | 283.217417  | 6.39182E-06 | 0.002248643 |
| 351.839997 | 275.155664  | 6.20988E-06 | 0.002184884 |
| 351.879997 | 353.982934  | 7.9889E-06  | 0.002811135 |
| 351.919997 | 560.213081  | 1.26432E-05 | 0.004449405 |
| 351.959997 | 989.377706  | 2.23289E-05 | 0.007858871 |
| 351.999997 | 1847.204117 | 4.16888E-05 | 0.014674466 |
| 352.039997 | 3344.650342 | 7.54841E-05 | 0.026573422 |
| 352.079997 | 5263.107899 | 0.000118781 | 0.041820419 |
| 352.119997 | 7036.315847 | 0.0001588   | 0.055916602 |
| 352.159997 | 8136.560981 | 0.000183631 | 0.064667439 |
| 352.199997 | 8159.636439 | 0.000184152 | 0.064858203 |
| 352.239997 | 7132.378905 | 0.000160968 | 0.056699318 |
| 352.279997 | 5501.372069 | 0.000124158 | 0.043738487 |
| 352.319997 | 3868.006213 | 8.72955E-05 | 0.030755955 |
| 352.359997 | 2555.047955 | 5.76639E-05 | 0.020318442 |
| 352.399997 | 1666.948021 | 3.76207E-05 | 0.013257533 |

|            |             |             |             |
|------------|-------------|-------------|-------------|
| 352.439997 | 1136.023841 | 2.56385E-05 | 0.009036024 |
| 352.479997 | 861.081941  | 1.94334E-05 | 0.006849892 |
| 352.519997 | 821.025721  | 1.85294E-05 | 0.006531986 |
| 352.559997 | 895.293713  | 2.02055E-05 | 0.007123662 |
| 352.599997 | 868.72028   | 1.96058E-05 | 0.006913007 |
| 352.639997 | 751.502241  | 1.69604E-05 | 0.005980901 |
| 352.679997 | 590.213257  | 1.33203E-05 | 0.0046978   |
| 352.719997 | 438.785006  | 9.90277E-06 | 0.003492904 |
| 352.759997 | 317.874424  | 7.17398E-06 | 0.002530694 |
| 352.799997 | 278.609     | 6.28782E-06 | 0.002218342 |
| 352.839997 | 324.180344  | 7.3163E-06  | 0.002581483 |
| 352.879997 | 474.915611  | 1.07182E-05 | 0.003782233 |
| 352.919997 | 897.838452  | 2.0263E-05  | 0.007151205 |
| 352.959997 | 1892.492627 | 4.27109E-05 | 0.015075247 |
| 352.999997 | 3814.423788 | 8.60862E-05 | 0.03038844  |
| 353.039997 | 6602.594226 | 0.000149011 | 0.052606968 |
| 353.079997 | 9448.022511 | 0.000213229 | 0.075286792 |
| 353.119997 | 11462.80024 | 0.000258699 | 0.091351944 |
| 353.159997 | 12248.25825 | 0.000276426 | 0.097622651 |
| 353.199997 | 11976.34631 | 0.000270289 | 0.095466235 |
| 353.239997 | 10612.18498 | 0.000239502 | 0.084601768 |
| 353.279997 | 8250.687522 | 0.000186207 | 0.065783041 |
| 353.319997 | 5653.916297 | 0.000127601 | 0.04508399  |
| 353.359997 | 3492.045305 | 7.88106E-05 | 0.027848513 |
| 353.399997 | 1996.782151 | 4.50646E-05 | 0.015925827 |
| 353.439997 | 1112.889232 | 2.51164E-05 | 0.008877126 |
| 353.479997 | 755.477115  | 1.70501E-05 | 0.006026857 |
| 353.519997 | 783.775803  | 1.76887E-05 | 0.006253319 |
| 353.559997 | 946.961628  | 2.13716E-05 | 0.007556145 |
| 353.599997 | 976.733166  | 2.20435E-05 | 0.007794584 |
| 353.639997 | 888.518991  | 2.00526E-05 | 0.007091414 |
| 353.679997 | 687.543343  | 1.55169E-05 | 0.005488016 |
| 353.719997 | 457.766009  | 1.03311E-05 | 0.003654331 |
| 353.759997 | 304.282141  | 6.86722E-06 | 0.002429349 |
| 353.799997 | 260.566863  | 5.88063E-06 | 0.002080567 |
| 353.839997 | 296.939146  | 6.7015E-06  | 0.00237126  |
| 353.879997 | 401.232347  | 9.05526E-06 | 0.003204474 |
| 353.919997 | 592.108637  | 1.33631E-05 | 0.004729457 |
| 353.959997 | 1022.220536 | 2.30701E-05 | 0.00816589  |
| 353.999997 | 1887.71727  | 4.26031E-05 | 0.015081515 |
| 354.039997 | 3177.854028 | 7.17197E-05 | 0.025391656 |
| 354.079997 | 4537.163191 | 0.000102397 | 0.03625689  |
| 354.119997 | 5608.750974 | 0.000126582 | 0.04482511  |
| 354.159997 | 6101.812983 | 0.000137709 | 0.048771168 |
| 354.199997 | 5815.179287 | 0.00013124  | 0.046485384 |
| 354.239997 | 4859.499397 | 0.000109672 | 0.038850256 |



|            |             |             |             |
|------------|-------------|-------------|-------------|
| 354.279997 | 3634.12934  | 8.20172E-05 | 0.029057067 |
| 354.319997 | 2481.92629  | 5.60136E-05 | 0.019846745 |
| 354.359997 | 1567.462134 | 3.53754E-05 | 0.01253564  |
| 354.399997 | 957.822298  | 2.16167E-05 | 0.007660964 |
| 354.439997 | 597.118512  | 1.34761E-05 | 0.004776481 |
| 354.479997 | 439.269378  | 9.9137E-06  | 0.003514208 |
| 354.519997 | 437.021124  | 9.86296E-06 | 0.003496616 |
| 354.559997 | 532.146069  | 1.20098E-05 | 0.004258193 |
| 354.599997 | 603.785181  | 1.36266E-05 | 0.004831989 |
| 354.639997 | 586.485839  | 1.32362E-05 | 0.004694075 |
| 354.679997 | 505.907734  | 1.14176E-05 | 0.004049606 |
| 354.719997 | 387.364593  | 8.74228E-06 | 0.003101061 |
| 354.759997 | 292.821233  | 6.60857E-06 | 0.002344455 |
| 354.799997 | 271.199435  | 6.12059E-06 | 0.002171587 |
| 354.839997 | 391.542673  | 8.83657E-06 | 0.003135569 |
| 354.879997 | 734.905922  | 1.65858E-05 | 0.00588597  |
| 354.919997 | 1473.190948 | 3.32479E-05 | 0.011800333 |
| 354.959997 | 2935.071228 | 6.62405E-05 | 0.023512717 |
| 354.999997 | 5316.432345 | 0.000119984 | 0.042594488 |
| 355.039997 | 8108.177745 | 0.00018299  | 0.064968868 |
| 355.079997 | 10352.08713 | 0.000233632 | 0.082958116 |
| 355.119997 | 11402.50821 | 0.000257339 | 0.091386128 |
| 355.159997 | 10948.00526 | 0.000247081 | 0.087753369 |
| 355.199997 | 9160.85642  | 0.000206748 | 0.073436807 |
| 355.239997 | 6738.046118 | 0.000152068 | 0.054020748 |
| 355.279997 | 4450.27968  | 0.000100437 | 0.03568312  |
| 355.319997 | 2644.909621 | 5.96919E-05 | 0.021209735 |
| 355.359997 | 1381.303405 | 3.11741E-05 | 0.011078026 |
| 355.399997 | 696.333673  | 1.57153E-05 | 0.005585211 |
| 355.439997 | 414.971307  | 9.36532E-06 | 0.003328811 |
| 355.479997 | 351.138748  | 7.92471E-06 | 0.002817077 |
| 355.519997 | 388.139361  | 8.75976E-06 | 0.003114272 |
| 355.559997 | 483.93072   | 1.09216E-05 | 0.003883299 |
| 355.599997 | 578.149512  | 1.3048E-05  | 0.004639879 |
| 355.639997 | 580.345656  | 1.30976E-05 | 0.004658028 |
| 355.679997 | 495.599816  | 1.1185E-05  | 0.00397828  |
| 355.719997 | 401.471804  | 9.06066E-06 | 0.003223058 |
| 355.759997 | 333.787358  | 7.53312E-06 | 0.002679981 |
| 355.799997 | 315.077871  | 7.11087E-06 | 0.002530047 |
| 355.839997 | 340.763451  | 7.69056E-06 | 0.002736608 |
| 355.879997 | 427.967736  | 9.65864E-06 | 0.003437315 |
| 355.919997 | 715.944035  | 1.61579E-05 | 0.005750905 |
| 355.959997 | 1326.877798 | 2.99458E-05 | 0.010659501 |
| 355.999997 | 2352.804882 | 5.30995E-05 | 0.018903432 |
| 356.039997 | 3872.127381 | 8.73885E-05 | 0.031113809 |
| 356.079997 | 5537.917371 | 0.000124983 | 0.044503975 |

|            |             |             |             |
|------------|-------------|-------------|-------------|
| 356.119997 | 6585.68484  | 0.00014863  | 0.05293002  |
| 356.159997 | 6533.251251 | 0.000147446 | 0.052514502 |
| 356.199997 | 5560.740286 | 0.000125498 | 0.044702445 |
| 356.239997 | 4148.597604 | 9.36281E-05 | 0.033354063 |
| 356.279997 | 2721.420122 | 6.14187E-05 | 0.021882241 |
| 356.319997 | 1605.424129 | 3.62322E-05 | 0.012910253 |
| 356.359997 | 877.144532  | 1.97959E-05 | 0.007054478 |
| 356.399997 | 478.060937  | 1.07892E-05 | 0.00384526  |
| 356.439997 | 317.409615  | 7.16349E-06 | 0.002553355 |
| 356.479997 | 298.038908  | 6.72632E-06 | 0.0023978   |
| 356.519997 | 375.530405  | 8.4752E-06  | 0.003021578 |
| 356.559997 | 490.07499   | 1.10603E-05 | 0.003943664 |
| 356.599996 | 563.727049  | 1.27225E-05 | 0.004536856 |
| 356.639996 | 561.451834  | 1.26712E-05 | 0.004519052 |
| 356.679996 | 501.253447  | 1.13126E-05 | 0.004034975 |
| 356.719996 | 415.712426  | 9.38205E-06 | 0.003346765 |
| 356.759996 | 350.622895  | 7.91307E-06 | 0.002823067 |
| 356.799996 | 320.666167  | 7.23699E-06 | 0.002582158 |
| 356.839996 | 362.006352  | 8.16998E-06 | 0.002915375 |
| 356.879996 | 542.58628   | 1.22454E-05 | 0.004370144 |
| 356.919996 | 951.389985  | 2.14715E-05 | 0.007663624 |
| 356.959996 | 1870.076171 | 4.2205E-05  | 0.015065502 |
| 356.999996 | 3642.855968 | 8.22142E-05 | 0.029350464 |
| 357.039996 | 6183.718803 | 0.000139558 | 0.049827759 |
| 357.079996 | 8926.366656 | 0.000201456 | 0.071935787 |
| 357.119996 | 10804.53215 | 0.000243843 | 0.087081297 |
| 357.159996 | 10907.15382 | 0.000246159 | 0.087918244 |
| 357.199996 | 9509.381527 | 0.000214613 | 0.07665994  |
| 357.239996 | 7200.384784 | 0.000162503 | 0.058052448 |
| 357.279996 | 4718.872182 | 0.000106498 | 0.038049738 |
| 357.319996 | 2662.152111 | 6.00811E-05 | 0.021468166 |
| 357.359996 | 1326.933536 | 2.9947E-05  | 0.010701875 |
| 357.399996 | 655.400821  | 1.47915E-05 | 0.005286476 |
| 357.439996 | 372.282619  | 8.4019E-06  | 0.003003175 |
| 357.479996 | 306.077317  | 6.90774E-06 | 0.002469378 |
| 357.519996 | 357.726858  | 8.0734E-06  | 0.002886401 |
| 357.559996 | 470.639294  | 1.06217E-05 | 0.003797885 |
| 357.599996 | 537.279515  | 1.21257E-05 | 0.004336132 |
| 357.639996 | 546.467919  | 1.2333E-05  | 0.004410781 |
| 357.679996 | 515.132237  | 1.16258E-05 | 0.004158322 |
| 357.719996 | 416.675283  | 9.40378E-06 | 0.00336392  |
| 357.759996 | 305.231674  | 6.88865E-06 | 0.002464485 |
| 357.799996 | 267.272822  | 6.03198E-06 | 0.002158241 |
| 357.839996 | 290.288644  | 6.55141E-06 | 0.002344357 |
| 357.879996 | 372.513279  | 8.40711E-06 | 0.003008735 |
| 357.919996 | 589.25244   | 1.32986E-05 | 0.004759837 |

|            |             |             |             |
|------------|-------------|-------------|-------------|
| 357.959996 | 1077.010512 | 2.43066E-05 | 0.0087008   |
| 357.999996 | 1989.742975 | 4.49057E-05 | 0.01607625  |
| 358.039996 | 3324.14761  | 7.50214E-05 | 0.026860655 |
| 358.079996 | 4842.071878 | 0.000109279 | 0.039130559 |
| 358.119996 | 5957.699431 | 0.000134457 | 0.048151732 |
| 358.159996 | 6218.301861 | 0.000140338 | 0.050263605 |
| 358.199996 | 5581.26262  | 0.000125961 | 0.045119345 |
| 358.239996 | 4358.643348 | 9.83685E-05 | 0.035239534 |
| 358.279996 | 3025.604389 | 6.82837E-05 | 0.024464675 |
| 358.319996 | 1895.783729 | 4.27852E-05 | 0.015330792 |
| 358.359996 | 1104.044423 | 2.49167E-05 | 0.008929165 |
| 358.399996 | 605.455872  | 1.36643E-05 | 0.004897284 |
| 358.439996 | 370.050515  | 8.35152E-06 | 0.00299352  |
| 358.479996 | 347.40235   | 7.84039E-06 | 0.002810622 |
| 358.519996 | 413.012344  | 9.32111E-06 | 0.003341806 |
| 358.559996 | 514.682671  | 1.16157E-05 | 0.004164915 |
| 358.599996 | 588.702037  | 1.32862E-05 | 0.004764426 |
| 358.639996 | 584.73866   | 1.31967E-05 | 0.004732878 |
| 358.679996 | 509.637831  | 1.15018E-05 | 0.004125471 |
| 358.719996 | 412.694119  | 9.31393E-06 | 0.003341093 |
| 358.759996 | 328.581898  | 7.41564E-06 | 0.002660433 |
| 358.799996 | 269.178328  | 6.07498E-06 | 0.002179703 |
| 358.839996 | 282.871679  | 6.38402E-06 | 0.002290842 |
| 358.879996 | 420.716946  | 9.495E-06   | 0.003407564 |
| 358.919996 | 835.449536  | 1.88549E-05 | 0.006767412 |
| 358.959996 | 1795.811482 | 4.0529E-05  | 0.014548277 |
| 358.999996 | 3570.405369 | 8.05791E-05 | 0.028927888 |
| 359.039996 | 6186.634316 | 0.000139624 | 0.0501305   |
| 359.079996 | 9056.591879 | 0.000204395 | 0.073394035 |
| 359.119996 | 11138.29011 | 0.000251376 | 0.090274038 |
| 359.159996 | 11565.90906 | 0.000261026 | 0.093750261 |
| 359.199996 | 10329.82077 | 0.00023313  | 0.083740175 |
| 359.239996 | 8004.867446 | 0.000180659 | 0.064899834 |
| 359.279996 | 5405.013069 | 0.000121984 | 0.043826273 |
| 359.319996 | 3232.554084 | 7.29542E-05 | 0.026213918 |
| 359.359996 | 1747.141175 | 3.94305E-05 | 0.01416976  |
| 359.399996 | 903.24738   | 2.0385E-05  | 0.007326382 |
| 359.439996 | 510.489963  | 1.1521E-05  | 0.004141125 |
| 359.479996 | 379.859847  | 8.57291E-06 | 0.003081789 |
| 359.519996 | 402.466269  | 9.0831E-06  | 0.003265557 |
| 359.559996 | 463.43009   | 1.0459E-05  | 0.003760628 |
| 359.599996 | 509.5304    | 1.14994E-05 | 0.004135181 |
| 359.639996 | 519.769074  | 1.17305E-05 | 0.004218744 |
| 359.679996 | 502.67353   | 1.13446E-05 | 0.004080441 |
| 359.719996 | 441.98308   | 9.97494E-06 | 0.003588186 |
| 359.759996 | 353.036711  | 7.96755E-06 | 0.002866405 |

|            |             |             |             |
|------------|-------------|-------------|-------------|
| 359.799996 | 314.51409   | 7.09814E-06 | 0.002553913 |
| 359.839996 | 337.434153  | 7.61542E-06 | 0.002740332 |
| 359.879996 | 409.028615  | 9.23121E-06 | 0.003322126 |
| 359.919996 | 594.28598   | 1.34122E-05 | 0.004827321 |
| 359.959996 | 1055.446634 | 2.382E-05   | 0.008574233 |
| 359.999996 | 2011.852204 | 4.54047E-05 | 0.016345693 |
| 360.039996 | 3493.349302 | 7.884E-05   | 0.028385563 |
| 360.079996 | 5207.861163 | 0.000117534 | 0.042321704 |
| 360.119996 | 6623.034565 | 0.000149473 | 0.053828096 |
| 360.159996 | 7110.804332 | 0.000160481 | 0.057798818 |
| 360.199996 | 6432.208381 | 0.000145166 | 0.052288787 |
| 360.239996 | 4966.489427 | 0.000112087 | 0.04037813  |
| 360.279996 | 3391.560606 | 7.65428E-05 | 0.027576839 |
| 360.319996 | 2051.051067 | 4.62894E-05 | 0.016678984 |
| 360.359996 | 1110.658342 | 2.5066E-05  | 0.009032788 |
| 360.399996 | 581.161071  | 1.3116E-05  | 0.004727005 |
| 360.439996 | 356.71602   | 8.05058E-06 | 0.002901752 |
| 360.479996 | 332.11158   | 7.4953E-06  | 0.002701904 |
| 360.519996 | 401.180775  | 9.05409E-06 | 0.003264181 |
| 360.559996 | 496.971208  | 1.12159E-05 | 0.004044022 |
| 360.599996 | 613.508969  | 1.3846E-05  | 0.004992883 |
| 360.639996 | 621.688836  | 1.40307E-05 | 0.005060014 |
| 360.679996 | 520.466427  | 1.17462E-05 | 0.00423662  |
| 360.719996 | 411.206768  | 9.28036E-06 | 0.003347613 |
| 360.759996 | 318.104644  | 7.17918E-06 | 0.00258996  |
| 360.799996 | 285.884844  | 6.45202E-06 | 0.00232789  |
| 360.839996 | 344.890191  | 7.78369E-06 | 0.002808667 |
| 360.879996 | 552.396097  | 1.24668E-05 | 0.004499023 |
| 360.919996 | 1030.113698 | 2.32482E-05 | 0.008390752 |
| 360.959996 | 2144.601305 | 4.84007E-05 | 0.017470704 |
| 360.999996 | 4182.511843 | 9.43935E-05 | 0.034076041 |
| 361.039996 | 7084.866468 | 0.000159896 | 0.057728695 |
| 361.079996 | 10292.53864 | 0.000232288 | 0.083874644 |
| 361.119996 | 12702.34445 | 0.000286674 | 0.103523794 |
| 361.159996 | 13364.41758 | 0.000301616 | 0.108931738 |
| 361.199996 | 12022.05027 | 0.000271321 | 0.098001119 |
| 361.239996 | 9232.365971 | 0.000208362 | 0.075268558 |
| 361.279996 | 6120.421816 | 0.000138129 | 0.049903387 |
| 361.319996 | 3547.218985 | 8.00558E-05 | 0.028925758 |
| 361.359996 | 1802.2888   | 4.06751E-05 | 0.014698371 |
| 361.399996 | 843.338213  | 1.9033E-05  | 0.006878515 |
| 361.439996 | 446.483246  | 1.00765E-05 | 0.003642052 |
| 361.479996 | 352.300515  | 7.95093E-06 | 0.002874103 |
| 361.519996 | 391.886489  | 8.84433E-06 | 0.003197403 |
| 361.559996 | 496.504508  | 1.12054E-05 | 0.00405143  |
| 361.599996 | 579.606806  | 1.30809E-05 | 0.00473006  |

|            |             |             |             |
|------------|-------------|-------------|-------------|
| 361.639996 | 569.173445  | 1.28455E-05 | 0.004645429 |
| 361.679996 | 475.884881  | 1.07401E-05 | 0.003884464 |
| 361.719996 | 385.4698    | 8.69952E-06 | 0.003146789 |
| 361.759996 | 346.330892  | 7.81621E-06 | 0.002827591 |
| 361.799996 | 354.115917  | 7.9919E-06  | 0.00289147  |
| 361.839996 | 405.458932  | 9.15064E-06 | 0.003311069 |
| 361.879996 | 488.822646  | 1.1032E-05  | 0.003992277 |
| 361.919996 | 673.462358  | 1.51991E-05 | 0.005500861 |
| 361.959996 | 1129.439534 | 2.54899E-05 | 0.009226316 |
| 361.999996 | 2006.585351 | 4.52858E-05 | 0.016393473 |
| 362.039996 | 3327.032644 | 7.50865E-05 | 0.027184313 |
| 362.079996 | 4913.764439 | 0.000110897 | 0.04015352  |
| 362.119996 | 6142.132076 | 0.000138619 | 0.050196844 |
| 362.159996 | 6500.270867 | 0.000146702 | 0.053129617 |
| 362.199996 | 5875.966536 | 0.000132612 | 0.048032204 |
| 362.239996 | 4593.816864 | 0.000103676 | 0.037555611 |
| 362.279996 | 3122.262497 | 7.04651E-05 | 0.025528102 |
| 362.319996 | 1839.257353 | 4.15095E-05 | 0.015039713 |
| 362.359996 | 985.27245   | 2.22362E-05 | 0.008057519 |
| 362.399996 | 539.289037  | 1.2171E-05  | 0.004410771 |
| 362.439996 | 360.870171  | 8.14434E-06 | 0.002951834 |
| 362.479996 | 361.75927   | 8.1644E-06  | 0.002959433 |
| 362.519996 | 449.729005  | 1.01498E-05 | 0.00367949  |
| 362.559996 | 574.077778  | 1.29561E-05 | 0.004697377 |
| 362.599996 | 635.307341  | 1.4338E-05  | 0.005198959 |
| 362.639996 | 599.156091  | 1.35221E-05 | 0.004903661 |
| 362.679996 | 496.075856  | 1.11957E-05 | 0.004060471 |
| 362.719996 | 388.600296  | 8.77017E-06 | 0.003181115 |
| 362.759996 | 316.820278  | 7.15019E-06 | 0.002593804 |
| 362.799996 | 290.742004  | 6.56164E-06 | 0.002380564 |
| 362.839996 | 356.838283  | 8.05334E-06 | 0.002922075 |
| 362.879996 | 524.505483  | 1.18374E-05 | 0.00429554  |
| 362.919996 | 920.344822  | 2.07709E-05 | 0.007538175 |
| 362.959996 | 1842.334759 | 4.15789E-05 | 0.015091488 |
| 362.999996 | 3629.351628 | 8.19094E-05 | 0.029733116 |
| 363.039996 | 6276.653268 | 0.000141655 | 0.051426547 |
| 363.079996 | 9358.59235  | 0.00021121  | 0.076686269 |
| 363.119996 | 11827.47271 | 0.00026693  | 0.09692747  |
| 363.159996 | 12711.79747 | 0.000286888 | 0.104186086 |
| 363.199996 | 11621.37897 | 0.000262278 | 0.095259491 |
| 363.239996 | 9179.153235 | 0.000207161 | 0.075249053 |
| 363.279996 | 6307.926679 | 0.000142361 | 0.051716947 |
| 363.319996 | 3780.113441 | 8.53119E-05 | 0.030995517 |
| 363.359996 | 1975.771521 | 4.45904E-05 | 0.016202372 |
| 363.399996 | 961.574765  | 2.17014E-05 | 0.00788629  |
| 363.439996 | 529.812808  | 1.19571E-05 | 0.004345702 |

|            |             |             |             |
|------------|-------------|-------------|-------------|
| 363.479996 | 407.886053  | 9.20542E-06 | 0.003345986 |
| 363.519996 | 464.869408  | 1.04915E-05 | 0.003813854 |
| 363.559996 | 572.887876  | 1.29293E-05 | 0.004700569 |
| 363.599996 | 609.579512  | 1.37574E-05 | 0.005002176 |
| 363.639996 | 573.744358  | 1.29486E-05 | 0.004708633 |
| 363.679996 | 492.225161  | 1.11088E-05 | 0.004040062 |
| 363.719996 | 397.845746  | 8.97882E-06 | 0.003265778 |
| 363.759996 | 324.316164  | 7.31936E-06 | 0.002662492 |
| 363.799996 | 308.338962  | 6.95878E-06 | 0.002531604 |
| 363.839996 | 344.71039   | 7.77963E-06 | 0.002830542 |
| 363.879996 | 435.878923  | 9.83718E-06 | 0.003579553 |
| 363.919996 | 631.821366  | 1.42593E-05 | 0.005189255 |
| 363.959996 | 1025.763899 | 2.31501E-05 | 0.008425697 |
| 363.999996 | 1808.554335 | 4.08166E-05 | 0.014857225 |
| 364.039996 | 2997.396102 | 6.76471E-05 | 0.024626234 |
| 364.079996 | 4445.342496 | 0.000100325 | 0.036526394 |
| 364.119996 | 5635.568693 | 0.000127187 | 0.046311307 |
| 364.159996 | 6028.561154 | 0.000136056 | 0.049546236 |
| 364.199996 | 5447.85914  | 0.000122951 | 0.044778605 |
| 364.239996 | 4240.978425 | 9.5713E-05  | 0.034862494 |
| 364.279996 | 2857.91125  | 6.44991E-05 | 0.023495723 |
| 364.319996 | 1664.754929 | 3.75712E-05 | 0.013687939 |
| 364.359996 | 902.055669  | 2.03581E-05 | 0.007417692 |
| 364.399996 | 511.17144   | 1.15364E-05 | 0.004203874 |
| 364.439996 | 347.685322  | 7.84677E-06 | 0.002859678 |
| 364.479996 | 350.004092  | 7.8991E-06  | 0.002879066 |
| 364.519996 | 421.82998   | 9.52012E-06 | 0.003470272 |
| 364.559996 | 501.429111  | 1.13166E-05 | 0.004125564 |
| 364.599996 | 560.687673  | 1.26539E-05 | 0.004613626 |
| 364.639996 | 574.586836  | 1.29676E-05 | 0.004728515 |
| 364.679996 | 503.591708  | 1.13654E-05 | 0.004144721 |
| 364.719996 | 394.810101  | 8.91031E-06 | 0.00324977  |
| 364.759996 | 310.901723  | 7.01662E-06 | 0.002559382 |
| 364.799996 | 295.354401  | 6.66574E-06 | 0.002431661 |
| 364.839996 | 354.456431  | 7.99959E-06 | 0.00291857  |
| 364.879996 | 507.170343  | 1.14461E-05 | 0.004176463 |
| 364.919996 | 928.684554  | 2.09591E-05 | 0.007648401 |
| 364.959996 | 1897.1147   | 4.28152E-05 | 0.015625848 |
| 364.999996 | 3718.273931 | 8.39163E-05 | 0.030629436 |
| 365.039996 | 6521.036326 | 0.000147171 | 0.053723194 |
| 365.079996 | 9779.952843 | 0.00022072  | 0.080580425 |
| 365.119996 | 12316.56312 | 0.000277968 | 0.101491556 |
| 365.159996 | 13161.3855  | 0.000297034 | 0.108464985 |
| 365.199996 | 12205.67538 | 0.000275465 | 0.100599851 |
| 365.239996 | 9859.237755 | 0.000222509 | 0.081269282 |
| 365.279996 | 6856.99748  | 0.000154753 | 0.056528132 |

|            |             |             |             |
|------------|-------------|-------------|-------------|
| 365.319996 | 4055.925453 | 9.15366E-05 | 0.033440146 |
| 365.359996 | 2064.685551 | 4.65971E-05 | 0.017024708 |
| 365.399996 | 993.691298  | 2.24262E-05 | 0.008194544 |
| 365.439996 | 542.927417  | 1.22531E-05 | 0.004477779 |
| 365.479996 | 413.044497  | 9.32184E-06 | 0.003406946 |
| 365.519996 | 418.353861  | 9.44166E-06 | 0.003451117 |
| 365.559996 | 484.59616   | 1.09367E-05 | 0.003998006 |
| 365.599996 | 523.249284  | 1.1809E-05  | 0.004317373 |
| 365.639996 | 516.194033  | 1.16498E-05 | 0.004259626 |
| 365.679996 | 484.84289   | 1.09422E-05 | 0.004001354 |
| 365.719996 | 420.75048   | 9.49575E-06 | 0.003472786 |
| 365.759996 | 338.529946  | 7.64015E-06 | 0.002794461 |
| 365.799996 | 272.378675  | 6.14721E-06 | 0.002248648 |
| 365.839996 | 260.141566  | 5.87103E-06 | 0.002147859 |
| 365.879996 | 341.223902  | 7.70095E-06 | 0.002817623 |
| 365.919996 | 532.911328  | 1.20271E-05 | 0.004400944 |
| 365.959996 | 977.369237  | 2.20579E-05 | 0.008072295 |
| 365.999996 | 1848.208924 | 4.17115E-05 | 0.015266409 |
| 366.039996 | 3170.354495 | 7.15505E-05 | 0.026190339 |
| 366.079996 | 4717.473946 | 0.000106467 | 0.038975372 |
| 366.119996 | 6048.723497 | 0.000136511 | 0.049979503 |
| 366.159996 | 6700.51765  | 0.000151221 | 0.055371209 |
| 366.199996 | 6256.909471 | 0.00014121  | 0.051711003 |
| 366.239996 | 4967.304199 | 0.000112105 | 0.041057385 |
| 366.279996 | 3444.969296 | 7.77482E-05 | 0.028477595 |
| 366.319996 | 2131.091342 | 4.80958E-05 | 0.01761844  |
| 366.359996 | 1182.692143 | 2.66917E-05 | 0.009778776 |
| 366.399996 | 623.375525  | 1.40687E-05 | 0.005154778 |
| 366.439996 | 386.78247   | 8.72914E-06 | 0.003198707 |
| 366.479996 | 344.565555  | 7.77636E-06 | 0.002849882 |
| 366.519996 | 400.125475  | 9.03027E-06 | 0.003309776 |
| 366.559996 | 481.489472  | 1.08665E-05 | 0.003983241 |
| 366.599996 | 532.521182  | 1.20183E-05 | 0.004405895 |
| 366.639996 | 529.060077  | 1.19401E-05 | 0.004377736 |
| 366.679996 | 483.934902  | 1.09217E-05 | 0.004004782 |
| 366.719996 | 416.214261  | 9.39338E-06 | 0.003444739 |
| 366.759996 | 354.118267  | 7.99196E-06 | 0.00293113  |
| 366.799996 | 322.479962  | 7.27792E-06 | 0.002669542 |
| 366.839996 | 366.609693  | 8.27387E-06 | 0.003035186 |
| 366.879996 | 533.579562  | 1.20421E-05 | 0.004418023 |
| 366.919996 | 928.865984  | 2.09632E-05 | 0.007691821 |
| 366.959996 | 1776.145524 | 4.00851E-05 | 0.014709639 |
| 366.999996 | 3393.115801 | 7.65779E-05 | 0.028104088 |
| 367.039996 | 5880.160886 | 0.000132707 | 0.048708792 |
| 367.079996 | 9062.512303 | 0.000204528 | 0.07507824  |
| 367.119996 | 12236.31762 | 0.000276157 | 0.101382626 |

|            |             |             |             |
|------------|-------------|-------------|-------------|
| 367.159996 | 14248.72353 | 0.000321574 | 0.118069051 |
| 367.199996 | 14334.9491  | 0.00032352  | 0.118796482 |
| 367.239996 | 12394.05444 | 0.000279717 | 0.102723103 |
| 367.279996 | 9112.051308 | 0.000205646 | 0.075529774 |
| 367.319996 | 5742.144604 | 0.000129592 | 0.047601808 |
| 367.359996 | 3171.682562 | 7.15805E-05 | 0.026295797 |
| 367.399996 | 1582.903342 | 3.57239E-05 | 0.013124969 |
| 367.439996 | 787.94348   | 1.77828E-05 | 0.006534107 |
| 367.479996 | 508.901779  | 1.14852E-05 | 0.004220583 |
| 367.519996 | 469.34129   | 1.05924E-05 | 0.003892911 |
| 367.559996 | 496.72601   | 1.12104E-05 | 0.0041205   |
| 367.599996 | 533.369542  | 1.20374E-05 | 0.004424951 |
| 367.639996 | 539.115294  | 1.21671E-05 | 0.004473106 |
| 367.679996 | 470.072615  | 1.06089E-05 | 0.003900674 |
| 367.719996 | 357.408285  | 8.06621E-06 | 0.002966106 |
| 367.759996 | 281.366871  | 6.35006E-06 | 0.002335297 |
| 367.799996 | 250.998261  | 5.66468E-06 | 0.00208347  |
| 367.839996 | 281.859528  | 6.36118E-06 | 0.002339895 |
| 367.879996 | 362.116977  | 8.17248E-06 | 0.00300649  |
| 367.919996 | 528.107315  | 1.19186E-05 | 0.004385108 |
| 367.959996 | 866.026097  | 1.9545E-05  | 0.007191779 |
| 367.999996 | 1572.431487 | 3.54876E-05 | 0.013059432 |
| 368.039996 | 2698.194544 | 6.08945E-05 | 0.022411609 |
| 368.079996 | 4111.015139 | 9.27799E-05 | 0.03415042  |
| 368.119996 | 5446.146588 | 0.000122912 | 0.045246344 |
| 368.159996 | 6099.55627  | 0.000137658 | 0.050680349 |
| 368.199996 | 5911.506369 | 0.000133414 | 0.049123205 |
| 368.239996 | 4951.683882 | 0.000111753 | 0.04115178  |
| 368.279996 | 3591.393419 | 8.10527E-05 | 0.029850105 |
| 368.319996 | 2272.043827 | 5.12769E-05 | 0.018886295 |
| 368.359996 | 1296.595536 | 2.92624E-05 | 0.010779081 |
| 368.399996 | 701.293321  | 1.58272E-05 | 0.005830745 |
| 368.439996 | 428.0004    | 9.65937E-06 | 0.003558899 |
| 368.479996 | 347.170309  | 7.83515E-06 | 0.002887096 |
| 368.519996 | 371.381396  | 8.38156E-06 | 0.003088773 |
| 368.559996 | 455.821164  | 1.02872E-05 | 0.003791468 |
| 368.599996 | 521.863162  | 1.17777E-05 | 0.004341269 |
| 368.639996 | 531.819569  | 1.20024E-05 | 0.004424575 |
| 368.679996 | 443.857328  | 1.00172E-05 | 0.003693157 |
| 368.719996 | 343.062698  | 7.74245E-06 | 0.002854795 |
| 368.759996 | 272.621096  | 6.15268E-06 | 0.002268862 |
| 368.799996 | 243.302461  | 5.491E-06   | 0.00202508  |
| 368.839996 | 273.527981  | 6.17315E-06 | 0.002276903 |
| 368.879996 | 438.483484  | 9.89596E-06 | 0.003650422 |
| 368.919996 | 924.69912   | 2.08692E-05 | 0.007699055 |
| 368.959996 | 2082.320917 | 4.69951E-05 | 0.017339306 |



|            |             |             |             |
|------------|-------------|-------------|-------------|
| 368.999996 | 4115.574742 | 9.28828E-05 | 0.034273749 |
| 369.039996 | 6830.057659 | 0.000154145 | 0.056885629 |
| 369.079996 | 9621.228307 | 0.000217138 | 0.080141189 |
| 369.119996 | 11773.78163 | 0.000265718 | 0.098081772 |
| 369.159996 | 12671.47444 | 0.000285978 | 0.105571463 |
| 369.199996 | 11875.38337 | 0.000268011 | 0.098949609 |
| 369.239996 | 9688.426015 | 0.000218654 | 0.080735906 |
| 369.279996 | 6915.84248  | 0.000156081 | 0.057637566 |
| 369.319996 | 4285.35313  | 9.67145E-05 | 0.035718581 |
| 369.359996 | 2298.407968 | 5.18719E-05 | 0.019159392 |
| 369.399996 | 1113.267607 | 2.51249E-05 | 0.009281138 |
| 369.439996 | 568.617769  | 1.28329E-05 | 0.004740991 |
| 369.479996 | 399.443926  | 9.01489E-06 | 0.003330823 |
| 369.519996 | 419.529839  | 9.4682E-06  | 0.003498691 |
| 369.559996 | 485.806728  | 1.0964E-05  | 0.004051849 |
| 369.599996 | 524.097346  | 1.18281E-05 | 0.004371683 |
| 369.639996 | 524.634273  | 1.18403E-05 | 0.004376635 |
| 369.679996 | 467.787284  | 1.05573E-05 | 0.003902825 |
| 369.719996 | 377.557634  | 8.52095E-06 | 0.003150366 |
| 369.759996 | 301.332674  | 6.80066E-06 | 0.002514612 |
| 369.799996 | 270.704073  | 6.10941E-06 | 0.002259261 |
| 369.839996 | 312.667144  | 7.05646E-06 | 0.002609762 |
| 369.879996 | 391.548007  | 8.83669E-06 | 0.003268516 |
| 369.919996 | 580.906581  | 1.31103E-05 | 0.004849745 |
| 369.959996 | 1078.718172 | 2.43452E-05 | 0.009006738 |
| 369.999996 | 2029.53446  | 4.58038E-05 | 0.016947393 |
| 370.039996 | 3540.815183 | 7.99113E-05 | 0.029570365 |
| 370.079996 | 5143.844    | 0.000116089 | 0.042962363 |
| 370.119996 | 6316.574588 | 0.000142556 | 0.052762934 |
| 370.159996 | 6643.391501 | 0.000149932 | 0.055498863 |
| 370.199996 | 5986.339182 | 0.000135103 | 0.050015255 |
| 370.239996 | 4699.650171 | 0.000106065 | 0.039269342 |
| 370.279996 | 3278.849943 | 7.39991E-05 | 0.027400378 |
| 370.319996 | 2076.333444 | 4.686E-05   | 0.017353178 |
| 370.359996 | 1186.765718 | 2.67836E-05 | 0.009919592 |
| 370.399996 | 641.159631  | 1.44701E-05 | 0.005359718 |
| 370.439996 | 390.722552  | 8.81806E-06 | 0.003266564 |
| 370.479996 | 333.284122  | 7.52176E-06 | 0.002786661 |
| 370.519996 | 380.211072  | 8.58083E-06 | 0.003179371 |
| 370.559996 | 446.015014  | 1.00659E-05 | 0.003730034 |
| 370.599996 | 507.407392  | 1.14515E-05 | 0.004243918 |
| 370.639996 | 527.425602  | 1.19033E-05 | 0.004411825 |
| 370.679996 | 473.193882  | 1.06793E-05 | 0.003958613 |
| 370.719996 | 412.572633  | 9.31119E-06 | 0.003451844 |
| 370.759996 | 354.76176   | 8.00648E-06 | 0.002968482 |
| 370.799996 | 314.736934  | 7.10317E-06 | 0.002633857 |

|            |             |             |             |
|------------|-------------|-------------|-------------|
| 370.839996 | 366.735689  | 8.27671E-06 | 0.003069336 |
| 370.879996 | 624.821762  | 1.41014E-05 | 0.005229911 |
| 370.919996 | 1215.324426 | 2.74282E-05 | 0.01017366  |
| 370.959996 | 2489.700298 | 5.61891E-05 | 0.020843896 |
| 370.999996 | 4691.308344 | 0.000105876 | 0.039280105 |
| 371.039996 | 7588.555072 | 0.000171263 | 0.063545467 |
| 371.079996 | 10378.45497 | 0.000234227 | 0.086917055 |
| 371.119996 | 12269.73802 | 0.000276911 | 0.102767171 |
| 371.159996 | 12585.1951  | 0.00028403  | 0.105420694 |
| 371.199996 | 11220.66544 | 0.000253235 | 0.094000753 |
| 371.239996 | 8731.981052 | 0.000197069 | 0.073159765 |
| 371.279996 | 5986.917416 | 0.000135116 | 0.050166012 |
| 371.319996 | 3639.009713 | 8.21274E-05 | 0.030495539 |
| 371.359996 | 1971.265161 | 4.44887E-05 | 0.016521327 |
| 371.399996 | 980.274391  | 2.21234E-05 | 0.008216641 |
| 371.439996 | 499.137976  | 1.12648E-05 | 0.004184215 |
| 371.479996 | 354.000291  | 7.98929E-06 | 0.002967863 |
| 371.519996 | 383.131758  | 8.64675E-06 | 0.003212441 |
| 371.559996 | 505.26251   | 1.14031E-05 | 0.004236925 |
| 371.599996 | 589.461967  | 1.33033E-05 | 0.004943519 |
| 371.639996 | 608.235508  | 1.3727E-05  | 0.005101513 |
| 371.679996 | 556.509107  | 1.25596E-05 | 0.004668165 |
| 371.719996 | 447.4786    | 1.0099E-05  | 0.003753989 |
| 371.759996 | 337.620387  | 7.61962E-06 | 0.002832671 |
| 371.799996 | 286.977728  | 6.47669E-06 | 0.002408032 |
| 371.839996 | 313.133535  | 7.06699E-06 | 0.002627789 |
| 371.879996 | 395.766792  | 8.93191E-06 | 0.003321597 |
| 371.919996 | 599.243761  | 1.35241E-05 | 0.005029882 |
| 371.959996 | 1122.624382 | 2.53361E-05 | 0.009424004 |
| 371.999996 | 2163.780241 | 4.88335E-05 | 0.018166064 |
| 372.039996 | 3654.119116 | 8.24684E-05 | 0.030681535 |
| 372.079996 | 5163.046535 | 0.000116523 | 0.043355791 |
| 372.119996 | 6208.813855 | 0.000140124 | 0.052143047 |
| 372.159996 | 6375.422933 | 0.000143884 | 0.053548023 |
| 372.199996 | 5627.429777 | 0.000127003 | 0.04727061  |
| 372.239996 | 4335.500363 | 9.78462E-05 | 0.036422271 |
| 372.279996 | 2993.515403 | 6.75595E-05 | 0.02515104  |
| 372.319996 | 1882.382116 | 4.24827E-05 | 0.015817174 |
| 372.359996 | 1104.801441 | 2.49338E-05 | 0.009284361 |
| 372.399996 | 623.268997  | 1.40663E-05 | 0.005238295 |
| 372.439996 | 372.381972  | 8.40414E-06 | 0.003130039 |
| 372.479996 | 294.123314  | 6.63795E-06 | 0.002472505 |
| 372.519996 | 347.41218   | 7.84061E-06 | 0.002920784 |
| 372.559996 | 448.140405  | 1.01139E-05 | 0.003768036 |
| 372.599996 | 511.787605  | 1.15503E-05 | 0.004303654 |
| 372.639996 | 515.496121  | 1.1634E-05  | 0.004335305 |

|            |             |             |             |
|------------|-------------|-------------|-------------|
| 372.679996 | 488.008537  | 1.10137E-05 | 0.004104576 |
| 372.719996 | 414.3735    | 9.35183E-06 | 0.003485615 |
| 372.759996 | 364.752967  | 8.23197E-06 | 0.003068548 |
| 372.799996 | 408.637193  | 9.22237E-06 | 0.0034381   |
| 372.839996 | 570.231593  | 1.28693E-05 | 0.004798202 |
| 372.879996 | 869.900607  | 1.96324E-05 | 0.007320546 |
| 372.919996 | 1345.42892  | 3.03645E-05 | 0.011323513 |
| 372.959996 | 2078.104398 | 4.68999E-05 | 0.017491795 |
| 372.999996 | 3335.084841 | 7.52682E-05 | 0.028075046 |
| 373.039996 | 5173.810179 | 0.000116766 | 0.043558272 |
| 373.079996 | 7236.701297 | 0.000163322 | 0.060932271 |
| 373.119996 | 8833.949121 | 0.00019937  | 0.074388906 |
| 373.159996 | 9443.913634 | 0.000213136 | 0.07953382  |
| 373.199996 | 8927.561103 | 0.000201483 | 0.075193313 |
| 373.239996 | 7366.475373 | 0.000166251 | 0.062051556 |
| 373.279996 | 5268.978775 | 0.000118914 | 0.044388035 |
| 373.319996 | 3290.577858 | 7.42638E-05 | 0.027724146 |
| 373.359996 | 1793.537378 | 4.04776E-05 | 0.015112732 |
| 373.399996 | 880.637245  | 1.98748E-05 | 0.007421234 |
| 373.439996 | 449.447326  | 1.01434E-05 | 0.003787951 |
| 373.479996 | 318.354471  | 7.18482E-06 | 0.002683385 |
| 373.519996 | 350.485647  | 7.90997E-06 | 0.002954533 |
| 373.559996 | 469.378346  | 1.05932E-05 | 0.003957202 |
| 373.599996 | 544.04724   | 1.22784E-05 | 0.004587206 |
| 373.639996 | 540.635644  | 1.22014E-05 | 0.004558929 |
| 373.679996 | 495.312192  | 1.11785E-05 | 0.004177184 |
| 373.719996 | 433.276446  | 9.77845E-06 | 0.003654401 |
| 373.759996 | 370.560287  | 8.36303E-06 | 0.003125766 |
| 373.799996 | 350.459842  | 7.90939E-06 | 0.00295653  |
| 373.839996 | 407.171321  | 9.18929E-06 | 0.003435324 |
| 373.879996 | 506.477099  | 1.14305E-05 | 0.004273629 |
| 373.919996 | 677.13193   | 1.52819E-05 | 0.005714217 |
| 373.959996 | 1026.246787 | 2.3161E-05  | 0.008661273 |
| 373.999996 | 1745.01673  | 3.93826E-05 | 0.014729091 |
| 374.039996 | 2914.829091 | 6.57836E-05 | 0.02460571  |
| 374.079996 | 4291.081334 | 9.68437E-05 | 0.036227302 |
| 374.119996 | 5456.462314 | 0.000123145 | 0.046070915 |
| 374.159996 | 6086.394135 | 0.000137361 | 0.051395155 |
| 374.199996 | 5801.450916 | 0.000130931 | 0.048994255 |
| 374.239996 | 4810.605042 | 0.000108569 | 0.040630733 |
| 374.279996 | 3545.283565 | 8.00121E-05 | 0.029946933 |
| 374.319996 | 2278.365812 | 5.14195E-05 | 0.019247363 |
| 374.359996 | 1291.379678 | 2.91446E-05 | 0.010910588 |
| 374.399996 | 688.739833  | 1.55439E-05 | 0.005819636 |
| 374.439996 | 419.371975  | 9.46464E-06 | 0.00354394  |
| 374.479996 | 373.30633   | 8.425E-06   | 0.003154995 |

|            |             |             |             |
|------------|-------------|-------------|-------------|
| 374.519996 | 410.833424  | 9.27194E-06 | 0.003472526 |
| 374.559996 | 474.907127  | 1.0718E-05  | 0.004014531 |
| 374.599996 | 549.809742  | 1.24084E-05 | 0.004648202 |
| 374.639996 | 545.372504  | 1.23083E-05 | 0.004611181 |
| 374.679996 | 489.650596  | 1.10507E-05 | 0.004140488 |
| 374.719996 | 405.583018  | 9.15344E-06 | 0.003429978 |
| 374.759996 | 356.194287  | 8.03881E-06 | 0.003012624 |
| 374.799996 | 352.336097  | 7.95173E-06 | 0.00298031  |
| 374.839996 | 448.631474  | 1.0125E-05  | 0.00379525  |
| 374.879996 | 636.706955  | 1.43696E-05 | 0.005386872 |
| 374.919996 | 980.642842  | 2.21317E-05 | 0.008297633 |
| 374.959996 | 1814.049553 | 4.09406E-05 | 0.015351077 |
| 374.999996 | 3495.15547  | 7.88808E-05 | 0.029580296 |
| 375.039996 | 5868.40581  | 0.000132442 | 0.049670952 |
| 375.079996 | 8314.601861 | 0.000187649 | 0.07038338  |
| 375.119996 | 10123.18387 | 0.000228466 | 0.085702225 |
| 375.159996 | 10661.08413 | 0.000240606 | 0.090265678 |
| 375.199996 | 9518.320188 | 0.000214815 | 0.080598673 |
| 375.239996 | 7271.115061 | 0.000164099 | 0.061576485 |
| 375.279996 | 4824.699606 | 0.000108887 | 0.040863019 |
| 375.319996 | 2748.092186 | 6.20206E-05 | 0.023277576 |
| 375.359996 | 1374.166794 | 3.1013E-05  | 0.011641051 |
| 375.399996 | 671.93522   | 1.51646E-05 | 0.005692807 |
| 375.439996 | 376.262961  | 8.49173E-06 | 0.003188135 |
| 375.479996 | 285.10606   | 6.43445E-06 | 0.002416006 |
| 375.519996 | 295.501245  | 6.66905E-06 | 0.002504362 |
| 375.559996 | 389.575503  | 8.79218E-06 | 0.00330199  |
| 375.599996 | 460.995123  | 1.0404E-05  | 0.003907749 |
| 375.639996 | 488.426282  | 1.10231E-05 | 0.004140718 |
| 375.679996 | 471.521356  | 1.06416E-05 | 0.003997829 |
| 375.719996 | 397.921248  | 8.98053E-06 | 0.003374164 |
| 375.759996 | 329.032548  | 7.42581E-06 | 0.002790321 |
| 375.799996 | 312.08366   | 7.04329E-06 | 0.00264687  |
| 375.839996 | 339.145137  | 7.65403E-06 | 0.002876692 |
| 375.879996 | 426.563875  | 9.62695E-06 | 0.003618579 |
| 375.919996 | 584.654631  | 1.31948E-05 | 0.004960204 |
| 375.959996 | 926.582471  | 2.09117E-05 | 0.007861954 |
| 375.999996 | 1578.943824 | 3.56346E-05 | 0.013398595 |
| 376.039996 | 2756.044811 | 6.22001E-05 | 0.023389723 |
| 376.079996 | 4419.376336 | 9.97392E-05 | 0.037509906 |
| 376.119996 | 6106.918383 | 0.000137825 | 0.051838604 |
| 376.159996 | 7605.605813 | 0.000171648 | 0.064567084 |
| 376.199996 | 8602.095376 | 0.000194137 | 0.073034456 |
| 376.239996 | 8846.575657 | 0.000199655 | 0.075118155 |
| 376.279996 | 8156.177023 | 0.000184074 | 0.069263196 |
| 376.319996 | 6511.340409 | 0.000146952 | 0.055300932 |

|            |             |             |             |
|------------|-------------|-------------|-------------|
| 376.359996 | 4504.523249 | 0.000101661 | 0.038261064 |
| 376.399996 | 2701.253123 | 6.09635E-05 | 0.022946669 |
| 376.439996 | 1449.580181 | 3.2715E-05  | 0.012315237 |
| 376.479996 | 800.030931  | 1.80556E-05 | 0.006797566 |
| 376.519996 | 560.416289  | 1.26478E-05 | 0.004762155 |
| 376.559996 | 518.484298  | 1.17015E-05 | 0.004406305 |
| 376.599996 | 581.340528  | 1.312E-05   | 0.004941009 |
| 376.639996 | 610.191143  | 1.37712E-05 | 0.005186771 |
| 376.679996 | 516.335639  | 1.1653E-05  | 0.004389443 |
| 376.719996 | 404.3783    | 9.12625E-06 | 0.003438043 |
| 376.759996 | 309.104135  | 6.97605E-06 | 0.002628296 |
| 376.799996 | 265.024502  | 5.98123E-06 | 0.002253729 |
| 376.839996 | 300.920024  | 6.79135E-06 | 0.002559251 |
| 376.879996 | 436.00228   | 9.83996E-06 | 0.003708486 |
| 376.919996 | 783.577027  | 1.76842E-05 | 0.006665544 |
| 376.959996 | 1548.138847 | 3.49393E-05 | 0.013170732 |
| 376.999996 | 3119.076561 | 7.03932E-05 | 0.026538241 |
| 377.039996 | 5725.242    | 0.000129211 | 0.048717616 |
| 377.079996 | 8988.323377 | 0.000202854 | 0.076492162 |
| 377.119996 | 12107.33044 | 0.000273246 | 0.103046373 |
| 377.159996 | 13817.42008 | 0.00031184  | 0.117613545 |
| 377.199996 | 13462.14259 | 0.000303822 | 0.114601584 |
| 377.239996 | 11378.13431 | 0.000256789 | 0.096870947 |
| 377.279996 | 8348.275364 | 0.000188409 | 0.071082927 |
| 377.319996 | 5321.424701 | 0.000120097 | 0.045315054 |
| 377.359996 | 3010.497178 | 6.79427E-05 | 0.025638868 |
| 377.399996 | 1566.06188  | 3.53438E-05 | 0.013338763 |
| 377.439996 | 798.680525  | 1.80251E-05 | 0.006803396 |
| 377.479996 | 491.719683  | 1.10974E-05 | 0.004189057 |
| 377.519996 | 436.731601  | 9.85642E-06 | 0.003720997 |
| 377.559996 | 502.710251  | 1.13455E-05 | 0.004283596 |
| 377.599996 | 564.158383  | 1.27323E-05 | 0.004807705 |
| 377.639996 | 540.79625   | 1.2205E-05  | 0.004609103 |
| 377.679996 | 487.265793  | 1.09969E-05 | 0.004153313 |
| 377.719996 | 405.406786  | 9.14947E-06 | 0.003455936 |
| 377.759996 | 317.907201  | 7.17472E-06 | 0.002710323 |
| 377.799996 | 282.727802  | 6.38077E-06 | 0.002410656 |
| 377.839996 | 303.682089  | 6.85368E-06 | 0.002589595 |
| 377.879996 | 392.780785  | 8.86452E-06 | 0.003349723 |
| 377.919996 | 553.334645  | 1.2488E-05  | 0.004719462 |
| 377.959996 | 865.046067  | 1.95229E-05 | 0.007378869 |
| 377.999996 | 1514.420381 | 3.41784E-05 | 0.012919419 |
| 378.039996 | 2659.006945 | 6.00101E-05 | 0.022686212 |
| 378.079996 | 4078.192742 | 9.20391E-05 | 0.034798154 |
| 378.119996 | 5441.507922 | 0.000122807 | 0.046435879 |
| 378.159996 | 6309.013436 | 0.000142386 | 0.053844555 |

|            |             |             |             |
|------------|-------------|-------------|-------------|
| 378.199996 | 6176.024994 | 0.000139384 | 0.052715135 |
| 378.239996 | 5159.962587 | 0.000116453 | 0.044047246 |
| 378.279996 | 3732.669145 | 8.42411E-05 | 0.031866739 |
| 378.319996 | 2320.739586 | 5.23759E-05 | 0.019814835 |
| 378.359996 | 1268.377187 | 2.86255E-05 | 0.010830746 |
| 378.399996 | 655.945702  | 1.48038E-05 | 0.005601751 |
| 378.439996 | 372.602415  | 8.40912E-06 | 0.003182346 |
| 378.479996 | 287.655391  | 6.49198E-06 | 0.002457085 |
| 378.519996 | 311.371434  | 7.02722E-06 | 0.002659943 |
| 378.559996 | 401.97547   | 9.07203E-06 | 0.003434306 |
| 378.599996 | 480.522109  | 1.08447E-05 | 0.004105809 |
| 378.639996 | 504.122519  | 1.13773E-05 | 0.004307917 |
| 378.679996 | 479.735124  | 1.0827E-05  | 0.004099951 |
| 378.719996 | 423.55965   | 9.55915E-06 | 0.003620242 |
| 378.759996 | 367.69407   | 8.29834E-06 | 0.00314308  |
| 378.799996 | 325.795461  | 7.35275E-06 | 0.002785222 |
| 378.839996 | 331.751185  | 7.48716E-06 | 0.002836436 |
| 378.879996 | 424.795242  | 9.58704E-06 | 0.003632337 |
| 378.919996 | 713.259899  | 1.60973E-05 | 0.006099582 |
| 378.959996 | 1367.858129 | 3.08707E-05 | 0.011698742 |
| 378.999996 | 2603.554338 | 5.87586E-05 | 0.022269507 |
| 379.039996 | 4603.922888 | 0.000103904 | 0.03938382  |
| 379.079996 | 7088.402322 | 0.000159975 | 0.060643462 |
| 379.119996 | 9188.334239 | 0.000207368 | 0.078617319 |
| 379.159996 | 10012.60149 | 0.00022597  | 0.085678962 |
| 379.199996 | 9347.553783 | 0.000210961 | 0.079996512 |
| 379.239996 | 7496.324278 | 0.000169182 | 0.064160428 |
| 379.279996 | 5183.427495 | 0.000116983 | 0.044369213 |
| 379.319996 | 3088.400626 | 6.97009E-05 | 0.026438945 |
| 379.359996 | 1625.713943 | 3.66901E-05 | 0.013918756 |
| 379.399996 | 857.443982  | 1.93513E-05 | 0.007341889 |
| 379.439996 | 521.929566  | 1.17792E-05 | 0.004469508 |
| 379.479996 | 388.917345  | 8.77732E-06 | 0.003330818 |
| 379.519996 | 390.982753  | 8.82394E-06 | 0.00334886  |
| 379.559996 | 510.516292  | 1.15216E-05 | 0.004373154 |
| 379.599996 | 632.755392  | 1.42804E-05 | 0.005420843 |
| 379.639996 | 722.376936  | 1.6303E-05  | 0.006189287 |
| 379.679996 | 811.394794  | 1.83121E-05 | 0.006952719 |
| 379.719996 | 823.356555  | 1.8582E-05  | 0.007055961 |
| 379.759996 | 701.650624  | 1.58353E-05 | 0.006013605 |
| 379.799996 | 549.776919  | 1.24077E-05 | 0.004712444 |
| 379.839996 | 427.373752  | 9.64523E-06 | 0.003663644 |
| 379.879996 | 422.295032  | 9.53061E-06 | 0.003620488 |
| 379.919996 | 544.012775  | 1.22776E-05 | 0.00466451  |
| 379.959996 | 829.184017  | 1.87135E-05 | 0.007110392 |
| 379.999996 | 1393.727314 | 3.14545E-05 | 0.011952704 |

|            |             |             |             |
|------------|-------------|-------------|-------------|
| 380.039996 | 2379.586062 | 5.37039E-05 | 0.020409646 |
| 380.079996 | 3664.685356 | 8.27068E-05 | 0.031435217 |
| 380.119996 | 4797.796445 | 0.00010828  | 0.041159235 |
| 380.159996 | 5325.023446 | 0.000120178 | 0.045687006 |
| 380.199996 | 5039.48233  | 0.000113734 | 0.043241703 |
| 380.239996 | 4072.702561 | 9.19152E-05 | 0.034949844 |
| 380.279996 | 2910.255979 | 6.56804E-05 | 0.024976951 |
| 380.319996 | 1829.705302 | 4.12939E-05 | 0.015704896 |
| 380.359996 | 1019.204103 | 2.3002E-05  | 0.008749047 |
| 380.399996 | 554.481506  | 1.25139E-05 | 0.004760278 |
| 380.439996 | 358.165174  | 8.08329E-06 | 0.003075206 |
| 380.479996 | 311.567785  | 7.03165E-06 | 0.002675403 |
| 380.519996 | 375.930205  | 8.48422E-06 | 0.003228416 |
| 380.559996 | 487.365698  | 1.09992E-05 | 0.004185842 |
| 380.599996 | 566.913899  | 1.27945E-05 | 0.00486957  |
| 380.639996 | 586.820859  | 1.32437E-05 | 0.005041093 |
| 380.679996 | 548.744531  | 1.23844E-05 | 0.004714493 |
| 380.719996 | 480.158963  | 1.08365E-05 | 0.004125679 |
| 380.759996 | 404.116063  | 9.12034E-06 | 0.003472659 |
| 380.799996 | 373.767845  | 8.43542E-06 | 0.003212208 |
| 380.839996 | 451.79608   | 1.01964E-05 | 0.0038832   |
| 380.879996 | 702.35203   | 1.58511E-05 | 0.00603737  |
| 380.919996 | 1266.595486 | 2.85853E-05 | 0.010888711 |
| 380.959996 | 2557.529162 | 5.77199E-05 | 0.021988962 |
| 380.999996 | 4711.310487 | 0.000106328 | 0.040510859 |
| 381.039996 | 7428.463627 | 0.00016765  | 0.063881385 |
| 381.079996 | 10273.29572 | 0.000231854 | 0.088354912 |
| 381.119996 | 12620.55489 | 0.000284828 | 0.108553778 |
| 381.159996 | 13520.38572 | 0.000305136 | 0.116305741 |
| 381.199996 | 12532.24896 | 0.000282835 | 0.107816855 |
| 381.239996 | 10039.22768 | 0.000226571 | 0.086378074 |
| 381.279996 | 7055.245035 | 0.000159227 | 0.06071009  |
| 381.319996 | 4323.216113 | 9.7569E-05  | 0.037204998 |
| 381.359996 | 2343.436892 | 5.28881E-05 | 0.020169408 |
| 381.399996 | 1210.011154 | 2.73083E-05 | 0.010415373 |
| 381.439996 | 677.39049   | 1.52878E-05 | 0.005831363 |
| 381.479996 | 516.217664  | 1.16503E-05 | 0.004444362 |
| 381.519996 | 502.801291  | 1.13475E-05 | 0.004329308 |
| 381.559996 | 546.312236  | 1.23295E-05 | 0.004704446 |
| 381.599996 | 588.367742  | 1.32786E-05 | 0.005067129 |
| 381.639996 | 591.5533    | 1.33505E-05 | 0.005095098 |
| 381.679996 | 514.808773  | 1.16185E-05 | 0.004434555 |
| 381.719996 | 434.751198  | 9.81173E-06 | 0.003745333 |
| 381.759996 | 364.831592  | 8.23374E-06 | 0.003143313 |
| 381.799996 | 300.610786  | 6.78437E-06 | 0.002590271 |
| 381.839996 | 296.728334  | 6.69675E-06 | 0.002557085 |

|            |             |             |             |
|------------|-------------|-------------|-------------|
| 381.879996 | 363.578597  | 8.20546E-06 | 0.003133502 |
| 381.919996 | 558.838263  | 1.26122E-05 | 0.004816852 |
| 381.959996 | 980.884096  | 2.21372E-05 | 0.00845552  |
| 381.999996 | 1733.42431  | 3.9121E-05  | 0.014944211 |
| 382.039996 | 2930.248123 | 6.61316E-05 | 0.025264923 |
| 382.079996 | 4389.994616 | 9.90761E-05 | 0.037854982 |
| 382.119996 | 5568.436117 | 0.000125672 | 0.048021726 |
| 382.159996 | 5982.33594  | 0.000135013 | 0.051596564 |
| 382.199996 | 5614.434531 | 0.00012671  | 0.048428549 |
| 382.239996 | 4538.44189  | 0.000102426 | 0.039151433 |
| 382.279996 | 3129.203446 | 7.06218E-05 | 0.026997287 |
| 382.319996 | 1900.579007 | 4.28934E-05 | 0.016399013 |
| 382.359996 | 1083.032517 | 2.44425E-05 | 0.009345848 |
| 382.399996 | 598.029507  | 1.34967E-05 | 0.005161135 |
| 382.439996 | 399.836905  | 9.02376E-06 | 0.003451048 |
| 382.479996 | 363.704233  | 8.2083E-06  | 0.00313951  |
| 382.519996 | 396.753799  | 8.95418E-06 | 0.003425153 |
| 382.559996 | 448.477854  | 1.01215E-05 | 0.003872089 |
| 382.599996 | 469.648897  | 1.05993E-05 | 0.0040553   |
| 382.639996 | 454.250951  | 1.02518E-05 | 0.003922753 |
| 382.679996 | 431.883379  | 9.74701E-06 | 0.003729984 |
| 382.719996 | 369.173243  | 8.33173E-06 | 0.003188718 |
| 382.759996 | 327.225263  | 7.38502E-06 | 0.00282669  |
| 382.799996 | 336.534587  | 7.59512E-06 | 0.002907411 |
| 382.839996 | 390.799166  | 8.81979E-06 | 0.003376569 |
| 382.879996 | 509.349379  | 1.14953E-05 | 0.004401323 |
| 382.919996 | 805.795095  | 1.81857E-05 | 0.006963658 |
| 382.959996 | 1439.966474 | 3.2498E-05  | 0.012445448 |
| 382.999996 | 2553.689007 | 5.76332E-05 | 0.022073517 |
| 383.039996 | 4290.081239 | 9.68212E-05 | 0.037086376 |
| 383.079996 | 6438.901401 | 0.000145317 | 0.05566805  |
| 383.119996 | 8365.698149 | 0.000188802 | 0.072333881 |
| 383.159996 | 9312.623153 | 0.000210173 | 0.08052986  |
| 383.199996 | 8943.824444 | 0.00020185  | 0.077348789 |
| 383.239996 | 7449.524567 | 0.000168125 | 0.064432375 |
| 383.279996 | 5427.34197  | 0.000122488 | 0.046947027 |
| 383.319996 | 3405.852682 | 7.68654E-05 | 0.029464026 |
| 383.359996 | 1869.447227 | 4.21908E-05 | 0.016174273 |
| 383.399996 | 947.076003  | 2.13742E-05 | 0.008194863 |
| 383.439996 | 483.997404  | 1.09231E-05 | 0.004188372 |
| 383.479996 | 341.123167  | 7.69867E-06 | 0.002952288 |
| 383.519996 | 343.238443  | 7.74641E-06 | 0.002970905 |
| 383.559996 | 394.340262  | 8.89971E-06 | 0.003413573 |
| 383.599996 | 470.792937  | 1.06251E-05 | 0.004075804 |
| 383.639996 | 521.360577  | 1.17664E-05 | 0.004514055 |
| 383.679996 | 493.813452  | 1.11447E-05 | 0.004275991 |



|            |             |             |             |
|------------|-------------|-------------|-------------|
| 383.719996 | 409.117294  | 9.23321E-06 | 0.003542966 |
| 383.759996 | 323.647534  | 7.30427E-06 | 0.002803088 |
| 383.799996 | 281.30457   | 6.34865E-06 | 0.002436613 |
| 383.839996 | 286.37927   | 6.46318E-06 | 0.002480827 |
| 383.879996 | 371.09523   | 8.3751E-06  | 0.003215034 |
| 383.919996 | 559.663875  | 1.26308E-05 | 0.00484923  |
| 383.959996 | 1000.957944 | 2.25902E-05 | 0.008673743 |
| 383.999996 | 1855.429533 | 4.18745E-05 | 0.016079793 |
| 384.039996 | 3078.65709  | 6.9481E-05  | 0.026683484 |
| 384.079996 | 4571.831032 | 0.00010318  | 0.03962932  |
| 384.119996 | 5833.442776 | 0.000131653 | 0.050570426 |
| 384.159996 | 6243.904782 | 0.000140916 | 0.05413438  |
| 384.199996 | 5730.166267 | 0.000129322 | 0.049685462 |
| 384.239996 | 4606.980542 | 0.000103973 | 0.039950637 |
| 384.279996 | 3294.937981 | 7.43622E-05 | 0.028575891 |
| 384.319996 | 2100.033261 | 4.73948E-05 | 0.018214779 |
| 384.359996 | 1243.728869 | 2.80692E-05 | 0.010788688 |
| 384.399996 | 736.648548  | 1.66251E-05 | 0.006390701 |
| 384.439996 | 456.109862  | 1.02938E-05 | 0.003957335 |
| 384.479996 | 348.460472  | 7.86427E-06 | 0.003023654 |
| 384.519996 | 371.83352   | 8.39176E-06 | 0.003226801 |
| 384.559996 | 471.884232  | 1.06498E-05 | 0.004095475 |
| 384.599996 | 550.983608  | 1.24349E-05 | 0.004782475 |
| 384.639996 | 582.248518  | 1.31405E-05 | 0.005054377 |
| 384.679996 | 539.628044  | 1.21787E-05 | 0.004684884 |
| 384.719996 | 446.225996  | 1.00707E-05 | 0.003874399 |
| 384.759996 | 372.804604  | 8.41368E-06 | 0.003237248 |
| 384.799996 | 343.18786   | 7.74527E-06 | 0.002980381 |
| 384.839996 | 385.162109  | 8.69257E-06 | 0.003345249 |
| 384.879996 | 528.345107  | 1.1924E-05  | 0.004589314 |
| 384.919996 | 879.452467  | 1.9848E-05  | 0.007639899 |
| 384.959996 | 1647.503116 | 3.71819E-05 | 0.014313525 |
| 384.999996 | 3016.057344 | 6.80682E-05 | 0.026206262 |
| 385.039996 | 4943.374343 | 0.000111565 | 0.042957015 |
| 385.079996 | 6997.749108 | 0.000157929 | 0.060815472 |
| 385.119996 | 8540.687695 | 0.000192751 | 0.074232428 |
| 385.159996 | 8980.49268  | 0.000202677 | 0.078063154 |
| 385.199996 | 8169.074497 | 0.000184365 | 0.071017256 |
| 385.239996 | 6544.923765 | 0.00014771  | 0.056903728 |
| 385.279996 | 4612.752785 | 0.000104103 | 0.04010896  |
| 385.319996 | 2873.715288 | 6.48558E-05 | 0.024990218 |
| 385.359996 | 1585.810914 | 3.57895E-05 | 0.013791858 |
| 385.399996 | 785.138369  | 1.77195E-05 | 0.006829087 |
| 385.439996 | 400.752926  | 9.04444E-06 | 0.003486087 |
| 385.479996 | 295.628244  | 6.67192E-06 | 0.002571891 |
| 385.519996 | 340.803716  | 7.69147E-06 | 0.002965214 |

|            |             |             |             |
|------------|-------------|-------------|-------------|
| 385.559996 | 443.869844  | 1.00175E-05 | 0.003862357 |
| 385.599996 | 548.768059  | 1.23849E-05 | 0.004775629 |
| 385.639996 | 583.914272  | 1.31781E-05 | 0.005082015 |
| 385.679996 | 529.300564  | 1.19456E-05 | 0.00460717  |
| 385.719996 | 425.968996  | 9.61353E-06 | 0.00370813  |
| 385.759996 | 334.164057  | 7.54162E-06 | 0.002909254 |
| 385.799996 | 284.582438  | 6.42263E-06 | 0.00247785  |
| 385.839996 | 292.419503  | 6.5995E-06  | 0.002546351 |
| 385.879996 | 345.371803  | 7.79456E-06 | 0.003007765 |
| 385.919996 | 497.565585  | 1.12294E-05 | 0.004333635 |
| 385.959996 | 854.184998  | 1.92778E-05 | 0.007440446 |
| 385.999996 | 1572.118201 | 3.54805E-05 | 0.01369548  |
| 386.039996 | 2610.133802 | 5.89071E-05 | 0.022740491 |
| 386.079996 | 3815.365998 | 8.61075E-05 | 0.033244382 |
| 386.119996 | 4808.496117 | 0.000108521 | 0.041902151 |
| 386.159996 | 5112.845339 | 0.00011539  | 0.044558924 |
| 386.199996 | 4636.670677 | 0.000104643 | 0.040413203 |
| 386.239996 | 3674.755888 | 8.29341E-05 | 0.032032475 |
| 386.279996 | 2586.04427  | 5.83634E-05 | 0.022544621 |
| 386.319996 | 1625.920015 | 3.66948E-05 | 0.014175916 |
| 386.359996 | 935.426862  | 2.11113E-05 | 0.008156555 |
| 386.399996 | 527.202472  | 1.18982E-05 | 0.004597474 |
| 386.439996 | 332.578735  | 7.50584E-06 | 0.002900556 |
| 386.479996 | 277.050575  | 6.25265E-06 | 0.002416522 |
| 386.519996 | 317.664439  | 7.16924E-06 | 0.002771056 |
| 386.559996 | 412.026872  | 9.29887E-06 | 0.003594572 |
| 386.599996 | 519.213401  | 1.17179E-05 | 0.004530149 |
| 386.639996 | 573.015786  | 1.29322E-05 | 0.005000093 |
| 386.679996 | 548.626559  | 1.23817E-05 | 0.00478777  |
| 386.719996 | 468.554427  | 1.05746E-05 | 0.004089417 |
| 386.759996 | 369.973404  | 8.34978E-06 | 0.003229363 |
| 386.799996 | 309.961315  | 6.9954E-06  | 0.002705819 |
| 386.839996 | 354.404022  | 7.99841E-06 | 0.003094103 |
| 386.879996 | 500.688942  | 1.12999E-05 | 0.004371687 |
| 386.919996 | 827.972778  | 1.86862E-05 | 0.007230061 |
| 386.959996 | 1546.989295 | 3.49134E-05 | 0.013510087 |
| 386.999996 | 2899.955837 | 6.5448E-05  | 0.025328362 |
| 387.039996 | 4965.024603 | 0.000112054 | 0.04336926  |
| 387.079996 | 7280.941566 | 0.000164321 | 0.06360526  |
| 387.119996 | 9160.037429 | 0.000206729 | 0.08002904  |
| 387.159996 | 9851.419979 | 0.000222333 | 0.086078376 |
| 387.199996 | 9107.357312 | 0.00020554  | 0.07958523  |
| 387.239996 | 7230.662147 | 0.000163186 | 0.063192136 |
| 387.279996 | 4925.160209 | 0.000111154 | 0.043047723 |
| 387.319996 | 2930.631159 | 6.61403E-05 | 0.025617446 |
| 387.359996 | 1525.065491 | 3.44186E-05 | 0.01333239  |

|            |             |             |             |
|------------|-------------|-------------|-------------|
| 387.399996 | 715.260054  | 1.61424E-05 | 0.006253575 |
| 387.439996 | 381.312598  | 8.60569E-06 | 0.00333419  |
| 387.479996 | 302.955655  | 6.83729E-06 | 0.002649312 |
| 387.519996 | 349.4246    | 7.88603E-06 | 0.003055993 |
| 387.559996 | 460.189971  | 1.03858E-05 | 0.004025139 |
| 387.599996 | 545.049702  | 1.2301E-05  | 0.004767872 |
| 387.639996 | 598.453112  | 1.35063E-05 | 0.005235564 |
| 387.679996 | 583.110802  | 1.316E-05   | 0.005101868 |
| 387.719996 | 531.675337  | 1.19992E-05 | 0.004652319 |
| 387.759996 | 504.564353  | 1.13873E-05 | 0.004415545 |
| 387.799996 | 521.551991  | 1.17707E-05 | 0.004564678 |
| 387.839996 | 625.404732  | 1.41145E-05 | 0.005474173 |
| 387.879996 | 761.898531  | 1.7195E-05  | 0.006669592 |
| 387.919996 | 903.266679  | 2.03855E-05 | 0.007907932 |
| 387.959996 | 1154.706498 | 2.60601E-05 | 0.010110283 |
| 387.999996 | 1728.685396 | 3.9014E-05  | 0.01513744  |
| 388.039996 | 2715.761872 | 6.1291E-05  | 0.023783345 |
| 388.079996 | 3935.823639 | 8.88261E-05 | 0.034471616 |
| 388.119996 | 4996.432996 | 0.000112763 | 0.043765394 |
| 388.159996 | 5506.756052 | 0.00012428  | 0.048240452 |
| 388.199996 | 5241.450381 | 0.000118292 | 0.045921045 |
| 388.239996 | 4287.086811 | 9.67536E-05 | 0.037563609 |
| 388.279996 | 3064.003529 | 6.91503E-05 | 0.026849675 |
| 388.319996 | 1965.892984 | 4.43675E-05 | 0.017228774 |
| 388.359996 | 1164.049462 | 2.6271E-05  | 0.010202596 |
| 388.399996 | 639.719865  | 1.44376E-05 | 0.005607558 |
| 388.439996 | 392.977138  | 8.86895E-06 | 0.003445054 |
| 388.479996 | 328.449506  | 7.41265E-06 | 0.002879665 |
| 388.519996 | 387.115538  | 8.73666E-06 | 0.003394367 |
| 388.559996 | 461.509388  | 1.04156E-05 | 0.004047095 |
| 388.599996 | 507.296322  | 1.1449E-05  | 0.00444907  |
| 388.639996 | 534.395752  | 1.20606E-05 | 0.004687219 |
| 388.679996 | 503.287724  | 1.13585E-05 | 0.004414823 |
| 388.719996 | 425.023073  | 9.59218E-06 | 0.003728672 |
| 388.759996 | 346.779194  | 7.82632E-06 | 0.003042561 |
| 388.799996 | 320.553333  | 7.23444E-06 | 0.002812751 |
| 388.839996 | 374.084462  | 8.44257E-06 | 0.003282807 |
| 388.879996 | 523.510605  | 1.18149E-05 | 0.00459458  |
| 388.919996 | 817.758449  | 1.84557E-05 | 0.007177779 |
| 388.959996 | 1469.581268 | 3.31664E-05 | 0.012900404 |
| 388.999996 | 2653.163564 | 5.98782E-05 | 0.023292622 |
| 389.039996 | 4470.919099 | 0.000100902 | 0.039255076 |
| 389.079996 | 6681.482856 | 0.000150792 | 0.058670058 |
| 389.119996 | 8455.464427 | 0.000190828 | 0.074255012 |
| 389.159996 | 9286.919423 | 0.000209593 | 0.081565147 |
| 389.199996 | 8881.193063 | 0.000200436 | 0.078009751 |

|            |             |             |             |
|------------|-------------|-------------|-------------|
| 389.239996 | 7357.693531 | 0.000166053 | 0.064634428 |
| 389.279996 | 5323.05656  | 0.000120134 | 0.046765752 |
| 389.319996 | 3307.748414 | 7.46513E-05 | 0.029063234 |
| 389.359996 | 1798.753648 | 4.05954E-05 | 0.015806211 |
| 389.399996 | 900.142132  | 2.0315E-05  | 0.007910643 |
| 389.439996 | 463.793916  | 1.04672E-05 | 0.00407634  |
| 389.479996 | 340.754475  | 7.69035E-06 | 0.002995239 |
| 389.519996 | 344.774388  | 7.78108E-06 | 0.003030885 |
| 389.559996 | 441.729608  | 9.96922E-06 | 0.00388361  |
| 389.599996 | 529.139646  | 1.19419E-05 | 0.004652582 |
| 389.639996 | 531.516155  | 1.19956E-05 | 0.004673957 |
| 389.679996 | 500.320978  | 1.12915E-05 | 0.00440009  |
| 389.719996 | 425.498144  | 9.6029E-06  | 0.003742442 |
| 389.759996 | 338.490256  | 7.63925E-06 | 0.002977475 |
| 389.799996 | 309.737097  | 6.99033E-06 | 0.002724832 |
| 389.839996 | 347.398619  | 7.8403E-06  | 0.003056464 |
| 389.879996 | 409.708326  | 9.24655E-06 | 0.003605043 |
| 389.919996 | 526.419415  | 1.18806E-05 | 0.004632465 |
| 389.959996 | 804.335554  | 1.81527E-05 | 0.00707884  |
| 389.999996 | 1360.588681 | 3.07066E-05 | 0.011975571 |
| 390.039996 | 2257.527221 | 5.09492E-05 | 0.019872243 |
| 390.079996 | 3417.170408 | 7.71208E-05 | 0.030083272 |
| 390.119996 | 4498.752294 | 0.000101531 | 0.039609107 |
| 390.159996 | 5045.112079 | 0.000113861 | 0.044424067 |
| 390.199996 | 4899.593461 | 0.000110577 | 0.043147145 |
| 390.239996 | 4055.731267 | 9.15322E-05 | 0.035719528 |
| 390.279996 | 2903.848165 | 6.55358E-05 | 0.025577315 |
| 390.319996 | 1866.831649 | 4.21318E-05 | 0.01644488  |
| 390.359996 | 1075.695268 | 2.42769E-05 | 0.009476748 |
| 390.399996 | 583.069711  | 1.31591E-05 | 0.005137301 |
| 390.439996 | 349.951989  | 7.89793E-06 | 0.003083667 |
| 390.479996 | 298.740327  | 6.74215E-06 | 0.002632676 |
| 390.519996 | 317.325927  | 7.1616E-06  | 0.00279675  |
| 390.559996 | 379.81992   | 8.57201E-06 | 0.003347883 |
| 390.599996 | 497.068589  | 1.12181E-05 | 0.004381808 |
| 390.639996 | 561.374217  | 1.26694E-05 | 0.004949188 |
| 390.679996 | 527.966384  | 1.19155E-05 | 0.004655134 |
| 390.719996 | 469.677739  | 1.06E-05    | 0.004141621 |
| 390.759996 | 433.661775  | 9.78714E-06 | 0.003824424 |
| 390.799996 | 416.028915  | 9.38919E-06 | 0.003669297 |
| 390.839996 | 467.914791  | 1.05602E-05 | 0.004127343 |
| 390.879996 | 646.879904  | 1.45992E-05 | 0.005706527 |
| 390.919996 | 975.343199  | 2.20121E-05 | 0.008604985 |
| 390.959996 | 1589.08822  | 3.58635E-05 | 0.014021197 |
| 390.999996 | 2767.865966 | 6.24669E-05 | 0.02442455  |
| 391.039996 | 4632.589154 | 0.000104551 | 0.040883656 |

|            |             |             |             |
|------------|-------------|-------------|-------------|
| 391.079996 | 7173.909474 | 0.000161905 | 0.063317863 |
| 391.119996 | 10158.0113  | 0.000229252 | 0.089665106 |
| 391.159996 | 13037.91682 | 0.000294248 | 0.115097899 |
| 391.199996 | 15054.91057 | 0.000339768 | 0.132917382 |
| 391.239996 | 15403.73893 | 0.000347641 | 0.136011037 |
| 391.279996 | 13721.55308 | 0.000309676 | 0.121170157 |
| 391.319996 | 10478.1231  | 0.000236477 | 0.092538039 |
| 391.359996 | 6790.130657 | 0.000153244 | 0.059973489 |
| 391.399996 | 3726.166734 | 8.40944E-05 | 0.032914545 |
| 391.439996 | 1784.097225 | 4.02646E-05 | 0.015761171 |
| 391.479996 | 850.962784  | 1.9205E-05  | 0.007518391 |
| 391.519996 | 515.736899  | 1.16395E-05 | 0.004557083 |
| 391.559996 | 469.84074   | 1.06037E-05 | 0.004151966 |
| 391.599996 | 533.748473  | 1.2046E-05  | 0.004717198 |
| 391.639996 | 566.668801  | 1.27889E-05 | 0.005008655 |
| 391.679996 | 516.426626  | 1.1655E-05  | 0.004565042 |
| 391.719996 | 398.938333  | 9.00348E-06 | 0.003526844 |
| 391.759996 | 325.693857  | 7.35046E-06 | 0.002879615 |
| 391.799996 | 326.64261   | 7.37187E-06 | 0.002888298 |
| 391.839996 | 341.926199  | 7.7168E-06  | 0.00302375  |
| 391.879996 | 401.273651  | 9.05619E-06 | 0.003548939 |
| 391.919996 | 547.144903  | 1.23483E-05 | 0.004839545 |
| 391.959996 | 863.297469  | 1.94834E-05 | 0.007636722 |
| 391.999996 | 1455.564971 | 3.28501E-05 | 0.012877229 |
| 392.039996 | 2356.718561 | 5.31879E-05 | 0.020851767 |
| 392.079996 | 3553.972274 | 8.02082E-05 | 0.031448032 |
| 392.119996 | 4868.087195 | 0.000109866 | 0.043080635 |
| 392.159996 | 5950.579407 | 0.000134296 | 0.052665632 |
| 392.199996 | 6423.180773 | 0.000144962 | 0.056854191 |
| 392.239996 | 6249.124817 | 0.000141034 | 0.055319192 |
| 392.279996 | 5337.610416 | 0.000120462 | 0.047255003 |
| 392.319996 | 3883.99774  | 8.76564E-05 | 0.034389366 |
| 392.359996 | 2438.540785 | 5.50345E-05 | 0.021593324 |
| 392.399996 | 1318.287564 | 2.97519E-05 | 0.011674651 |
| 392.439996 | 670.839539  | 1.51399E-05 | 0.005941508 |
| 392.479996 | 429.391573  | 9.69077E-06 | 0.003803433 |
| 392.519996 | 407.654155  | 9.20019E-06 | 0.003611257 |
| 392.559996 | 462.349166  | 1.04346E-05 | 0.004096197 |
| 392.599996 | 549.446771  | 1.24002E-05 | 0.004868337 |
| 392.639996 | 601.062675  | 1.35651E-05 | 0.005326219 |
| 392.679996 | 540.222542  | 1.21921E-05 | 0.004787582 |
| 392.719996 | 452.243744  | 1.02065E-05 | 0.004008301 |
| 392.759996 | 400.203818  | 9.03204E-06 | 0.003547425 |
| 392.799996 | 372.979769  | 8.41763E-06 | 0.003306447 |
| 392.839996 | 388.706114  | 8.77256E-06 | 0.003446211 |
| 392.879996 | 474.756176  | 1.07146E-05 | 0.004209546 |

|            |             |             |             |
|------------|-------------|-------------|-------------|
| 392.919996 | 706.756798  | 1.59505E-05 | 0.006267277 |
| 392.959996 | 1259.938084 | 2.8435E-05  | 0.011173836 |
| 392.999996 | 2307.487375 | 5.20768E-05 | 0.020466173 |
| 393.039996 | 3834.94727  | 8.65494E-05 | 0.034017383 |
| 393.079996 | 5703.264937 | 0.000128715 | 0.050595192 |
| 393.119996 | 7442.522092 | 0.000167967 | 0.066031327 |
| 393.159996 | 8636.288418 | 0.000194909 | 0.076630422 |
| 393.199996 | 8828.269586 | 0.000199242 | 0.078341854 |
| 393.239996 | 7918.823516 | 0.000178717 | 0.0702786   |
| 393.279996 | 6287.219756 | 0.000141894 | 0.05580399  |
| 393.319996 | 4351.098903 | 9.81982E-05 | 0.038623332 |
| 393.359996 | 2621.238796 | 5.91577E-05 | 0.023270276 |
| 393.399996 | 1390.901339 | 3.13907E-05 | 0.012349104 |
| 393.439996 | 704.144827  | 1.58916E-05 | 0.006252378 |
| 393.479996 | 413.101094  | 9.32312E-06 | 0.00366846  |
| 393.519996 | 387.253823  | 8.73978E-06 | 0.003439278 |
| 393.559996 | 478.693897  | 1.08035E-05 | 0.004251808 |
| 393.599996 | 566.064686  | 1.27753E-05 | 0.005028355 |
| 393.639996 | 622.618063  | 1.40516E-05 | 0.005531281 |
| 393.679996 | 559.629672  | 1.26301E-05 | 0.004972203 |
| 393.719996 | 443.113887  | 1.00005E-05 | 0.003937382 |
| 393.759996 | 350.680277  | 7.91437E-06 | 0.00311636  |
| 393.799996 | 302.656112  | 6.83053E-06 | 0.002689861 |
| 393.839996 | 299.963371  | 6.76976E-06 | 0.0026662   |
| 393.879996 | 349.663858  | 7.89143E-06 | 0.003108275 |
| 393.919996 | 462.759306  | 1.04438E-05 | 0.004114035 |
| 393.959996 | 735.509996  | 1.65994E-05 | 0.006539514 |
| 393.999996 | 1276.881922 | 2.88174E-05 | 0.011354074 |
| 394.039996 | 2107.336922 | 4.75597E-05 | 0.018740408 |
| 394.079996 | 3184.328438 | 7.18659E-05 | 0.028320897 |
| 394.119996 | 4187.496912 | 9.4506E-05  | 0.037246694 |
| 394.159996 | 4772.005301 | 0.000107698 | 0.042450051 |
| 394.199996 | 4739.408845 | 0.000106962 | 0.042164363 |
| 394.239996 | 4168.592714 | 9.40793E-05 | 0.037089835 |
| 394.279996 | 3220.693075 | 7.26866E-05 | 0.028658855 |
| 394.319996 | 2157.458634 | 4.86908E-05 | 0.01919977  |
| 394.359996 | 1281.128619 | 2.89133E-05 | 0.011402244 |
| 394.399996 | 710.650649  | 1.60384E-05 | 0.006325543 |
| 394.439996 | 422.955506  | 9.54552E-06 | 0.003765134 |
| 394.479996 | 328.329282  | 7.40993E-06 | 0.002923071 |
| 394.519996 | 351.527482  | 7.93349E-06 | 0.003129919 |
| 394.559996 | 434.888441  | 9.81483E-06 | 0.003872538 |
| 394.599996 | 540.414215  | 1.21964E-05 | 0.004812698 |
| 394.639996 | 568.357833  | 1.2827E-05  | 0.005062065 |
| 394.679996 | 496.318328  | 1.12012E-05 | 0.004420895 |
| 394.719996 | 389.169974  | 8.78302E-06 | 0.003466835 |

|            |             |             |             |
|------------|-------------|-------------|-------------|
| 394.759996 | 317.392293  | 7.1631E-06  | 0.002827706 |
| 394.799996 | 305.186284  | 6.88763E-06 | 0.002719236 |
| 394.839996 | 328.194763  | 7.4069E-06  | 0.00292454  |
| 394.879996 | 426.807966  | 9.63246E-06 | 0.003803666 |
| 394.919996 | 707.918752  | 1.59767E-05 | 0.006309534 |
| 394.959996 | 1316.538598 | 2.97124E-05 | 0.011735226 |
| 394.999996 | 2567.423163 | 5.79432E-05 | 0.02288755  |
| 395.039996 | 4555.308498 | 0.000102807 | 0.040612864 |
| 395.079996 | 6658.598029 | 0.000150275 | 0.059370758 |
| 395.119996 | 8150.74803  | 0.000183951 | 0.07268273  |
| 395.159996 | 8596.169715 | 0.000194004 | 0.076662453 |
| 395.199996 | 7883.537715 | 0.00017792  | 0.070314167 |
| 395.239996 | 6401.091607 | 0.000144464 | 0.057097841 |
| 395.279996 | 4680.930509 | 0.000105642 | 0.041758202 |
| 395.319996 | 2985.290273 | 6.73738E-05 | 0.026634227 |
| 395.359996 | 1705.917119 | 3.85002E-05 | 0.015221428 |
| 395.399996 | 906.317119  | 2.04543E-05 | 0.008087636 |
| 395.439996 | 499.106834  | 1.12641E-05 | 0.004454294 |
| 395.479996 | 359.386495  | 8.11085E-06 | 0.00320768  |
| 395.519996 | 359.286271  | 8.10859E-06 | 0.00320711  |
| 395.559996 | 421.0697    | 9.50296E-06 | 0.003758989 |
| 395.599996 | 502.040465  | 1.13304E-05 | 0.004482288 |
| 395.639996 | 541.089193  | 1.22116E-05 | 0.004831409 |
| 395.679996 | 513.274904  | 1.15839E-05 | 0.004583517 |
| 395.719996 | 442.825931  | 9.99396E-06 | 0.003954812 |
| 395.759996 | 361.553887  | 8.15977E-06 | 0.00322931  |
| 395.799996 | 300.263792  | 6.77654E-06 | 0.002682153 |
| 395.839996 | 290.883908  | 6.56484E-06 | 0.002598628 |
| 395.879996 | 345.160809  | 7.7898E-06  | 0.003083825 |
| 395.919996 | 477.884275  | 1.07852E-05 | 0.004270069 |
| 395.959996 | 803.409304  | 1.81318E-05 | 0.007179479 |
| 395.999996 | 1446.330484 | 3.26417E-05 | 0.012926099 |
| 396.039996 | 2373.960135 | 5.3577E-05  | 0.021218624 |
| 396.079996 | 3432.086698 | 7.74574E-05 | 0.030679333 |
| 396.119996 | 4308.515488 | 9.72372E-05 | 0.038517597 |
| 396.159996 | 4644.862141 | 0.000104828 | 0.041528687 |
| 396.199996 | 4387.426773 | 9.90181E-05 | 0.039230975 |
| 396.239996 | 3664.313581 | 8.26985E-05 | 0.032768435 |
| 396.279996 | 2688.112089 | 6.06669E-05 | 0.024041097 |
| 396.319996 | 1779.922886 | 4.01704E-05 | 0.015920325 |
| 396.359996 | 1085.587712 | 2.45002E-05 | 0.0097109   |
| 396.399996 | 636.873711  | 1.43734E-05 | 0.005697597 |
| 396.439996 | 419.163136  | 9.45993E-06 | 0.003750294 |
| 396.479996 | 329.594598  | 7.43849E-06 | 0.002949213 |
| 396.519996 | 344.847642  | 7.78273E-06 | 0.003086008 |
| 396.559996 | 430.0459    | 9.70554E-06 | 0.003848828 |

|            |             |             |             |
|------------|-------------|-------------|-------------|
| 396.599996 | 498.191281  | 1.12435E-05 | 0.004459165 |
| 396.639996 | 509.052048  | 1.14886E-05 | 0.004556837 |
| 396.679996 | 468.208209  | 1.05668E-05 | 0.004191641 |
| 396.719996 | 387.679455  | 8.74939E-06 | 0.003471056 |
| 396.759996 | 329.887885  | 7.44511E-06 | 0.002953922 |
| 396.799996 | 290.240214  | 6.55032E-06 | 0.002599166 |
| 396.839996 | 310.763625  | 7.0135E-06  | 0.002783238 |
| 396.879996 | 414.413304  | 9.35273E-06 | 0.003711912 |
| 396.919996 | 629.187956  | 1.41999E-05 | 0.005636223 |
| 396.959996 | 1147.930479 | 2.59072E-05 | 0.010284119 |
| 396.999996 | 2135.015547 | 4.81843E-05 | 0.019129178 |
| 397.039996 | 3531.056157 | 7.9691E-05  | 0.031640522 |
| 397.079996 | 5078.14297  | 0.000114607 | 0.045507994 |
| 397.119996 | 6354.067593 | 0.000143402 | 0.056947982 |
| 397.159996 | 6966.834272 | 0.000157232 | 0.062446159 |
| 397.199996 | 6603.843032 | 0.00014904  | 0.059198504 |
| 397.239996 | 5359.698042 | 0.000120961 | 0.048050515 |
| 397.279996 | 3853.001847 | 8.69569E-05 | 0.034546231 |
| 397.319996 | 2480.883125 | 5.59901E-05 | 0.022245977 |
| 397.359996 | 1447.932025 | 3.26778E-05 | 0.012984854 |
| 397.399996 | 804.641784  | 1.81596E-05 | 0.007216643 |
| 397.439996 | 452.807463  | 1.02192E-05 | 0.004061532 |
| 397.479996 | 334.652023  | 7.55263E-06 | 0.003002019 |
| 397.519996 | 355.957957  | 8.03348E-06 | 0.003193467 |
| 397.559996 | 437.34849   | 9.87035E-06 | 0.003924055 |
| 397.599996 | 513.911033  | 1.15983E-05 | 0.004611467 |
| 397.639996 | 571.957032  | 1.29083E-05 | 0.005132846 |
| 397.679996 | 522.871887  | 1.18005E-05 | 0.004692819 |
| 397.719996 | 392.483892  | 8.85781E-06 | 0.00352293  |
| 397.759996 | 295.419632  | 6.66721E-06 | 0.002651949 |
| 397.799996 | 263.595392  | 5.94898E-06 | 0.002366505 |
| 397.839996 | 264.163604  | 5.9618E-06  | 0.002371844 |
| 397.879996 | 316.700694  | 7.14749E-06 | 0.002843845 |
| 397.919996 | 458.979795  | 1.03585E-05 | 0.004121868 |
| 397.959996 | 761.398263  | 1.71837E-05 | 0.006838424 |
| 397.999996 | 1342.864442 | 3.03066E-05 | 0.012062019 |
| 398.039996 | 2310.177103 | 5.21375E-05 | 0.020752802 |
| 398.079996 | 3649.30103  | 8.23596E-05 | 0.032785726 |
| 398.119996 | 4841.372548 | 0.000109263 | 0.043499799 |
| 398.159996 | 5556.290018 | 0.000125398 | 0.049928358 |
| 398.199996 | 5670.883256 | 0.000127984 | 0.050963203 |
| 398.239996 | 5135.101369 | 0.000115892 | 0.046152864 |
| 398.279996 | 4154.485484 | 9.3761E-05  | 0.037343111 |
| 398.319996 | 3004.049445 | 6.77972E-05 | 0.027004985 |
| 398.359996 | 1895.364018 | 4.27757E-05 | 0.017040138 |
| 398.399996 | 1047.439753 | 2.36393E-05 | 0.00941788  |



|            |             |             |             |
|------------|-------------|-------------|-------------|
| 398.439996 | 547.051298  | 1.23462E-05 | 0.004919214 |
| 398.479996 | 344.785404  | 7.78133E-06 | 0.003100703 |
| 398.519996 | 348.729225  | 7.87033E-06 | 0.003136485 |
| 398.559996 | 444.472617  | 1.00311E-05 | 0.003998006 |
| 398.599996 | 497.179664  | 1.12207E-05 | 0.004472552 |
| 398.639996 | 510.041478  | 1.15109E-05 | 0.004588715 |
| 398.679996 | 482.271041  | 1.08842E-05 | 0.004339307 |
| 398.719996 | 399.156087  | 9.0084E-06  | 0.003591828 |
| 398.759996 | 345.274118  | 7.79236E-06 | 0.00310728  |
| 398.799996 | 351.889791  | 7.94166E-06 | 0.003167135 |
| 398.839996 | 389.682755  | 8.7946E-06  | 0.003507637 |
| 398.879996 | 490.507777  | 1.10701E-05 | 0.004415632 |
| 398.919996 | 711.463983  | 1.60568E-05 | 0.006405359 |
| 398.959996 | 1264.261357 | 2.85326E-05 | 0.011383373 |
| 398.999996 | 2427.037284 | 5.47749E-05 | 0.021855165 |
| 399.039996 | 4066.006323 | 9.17641E-05 | 0.036617546 |
| 399.079996 | 5712.911478 | 0.000128932 | 0.051454363 |
| 399.119996 | 6999.044324 | 0.000157959 | 0.063044468 |
| 399.159996 | 7641.652637 | 0.000172461 | 0.068839714 |
| 399.199996 | 7268.156066 | 0.000164032 | 0.065481637 |
| 399.239996 | 6112.816646 | 0.000137958 | 0.055078254 |
| 399.279996 | 4591.498542 | 0.000103624 | 0.041374881 |
| 399.319996 | 3030.89505  | 6.84031E-05 | 0.027314717 |
| 399.359996 | 1786.241421 | 4.0313E-05  | 0.016099392 |
| 399.399996 | 953.508956  | 2.15194E-05 | 0.008594836 |
| 399.439996 | 503.943255  | 1.13733E-05 | 0.00454295  |
| 399.479996 | 322.311583  | 7.27412E-06 | 0.002905867 |
| 399.519996 | 325.232807  | 7.34005E-06 | 0.002932497 |
| 399.559996 | 401.937349  | 9.07117E-06 | 0.003624475 |
| 399.599996 | 474.730649  | 1.0714E-05  | 0.004281318 |
| 399.639996 | 526.204608  | 1.18757E-05 | 0.004746007 |
| 399.679996 | 496.951248  | 1.12155E-05 | 0.00448261  |
| 399.719996 | 434.867325  | 9.81435E-06 | 0.003922992 |
| 399.759996 | 358.267773  | 8.0856E-06  | 0.003232301 |
| 399.799996 | 283.46326   | 6.39737E-06 | 0.002557669 |
| 399.839996 | 274.652967  | 6.19853E-06 | 0.002478422 |
| 399.879996 | 329.262443  | 7.43099E-06 | 0.002971506 |
| 399.919996 | 463.485343  | 1.04602E-05 | 0.004183251 |
| 399.959996 | 752.725788  | 1.6988E-05  | 0.006794509 |
| 399.999996 | 1331.396129 | 3.00478E-05 | 0.012019102 |
| 400.039996 | 2292.42841  | 5.17369E-05 | 0.020696836 |
| 400.079996 | 3516.108261 | 7.93537E-05 | 0.031747814 |
| 400.119996 | 4481.815551 | 0.000101148 | 0.040471471 |
| 400.159996 | 4807.417533 | 0.000108497 | 0.043416046 |
| 400.199996 | 4449.715869 | 0.000100424 | 0.04018964  |
| 400.239996 | 3593.882427 | 8.11089E-05 | 0.032463034 |

|            |             |             |             |
|------------|-------------|-------------|-------------|
| 400.279996 | 2551.102743 | 5.75748E-05 | 0.023046055 |
| 400.319996 | 1630.454075 | 3.67971E-05 | 0.014730606 |
| 400.359996 | 974.593211  | 2.19952E-05 | 0.008806003 |
| 400.399996 | 575.925165  | 1.29978E-05 | 0.005204331 |
| 400.439996 | 358.922554  | 8.10038E-06 | 0.003243717 |
| 400.479996 | 270.202185  | 6.09809E-06 | 0.002442162 |
| 400.519996 | 309.172451  | 6.97759E-06 | 0.002794665 |
| 400.559996 | 422.736502  | 9.54057E-06 | 0.003821572 |
| 400.599996 | 533.981023  | 1.20512E-05 | 0.004827714 |
| 400.639996 | 599.915633  | 1.35393E-05 | 0.005424369 |
| 400.679996 | 575.067588  | 1.29785E-05 | 0.005200215 |
| 400.719996 | 471.384085  | 1.06385E-05 | 0.004263053 |
| 400.759996 | 361.448826  | 8.1574E-06  | 0.003269158 |
| 400.799996 | 304.410322  | 6.87012E-06 | 0.002753543 |
| 400.839996 | 353.722595  | 7.98303E-06 | 0.003199916 |
| 400.879996 | 510.946583  | 1.15314E-05 | 0.004622689 |
| 400.919996 | 846.627042  | 1.91072E-05 | 0.007660456 |
| 400.959996 | 1596.788625 | 3.60373E-05 | 0.014449514 |
| 400.999996 | 3043.308018 | 6.86832E-05 | 0.027541972 |
| 401.039996 | 5322.285871 | 0.000120117 | 0.048171552 |
| 401.079996 | 8075.135978 | 0.000182245 | 0.073094652 |
| 401.119996 | 10466.2776  | 0.000236209 | 0.094748276 |
| 401.159996 | 11549.74542 | 0.000260662 | 0.104567033 |
| 401.199996 | 11000.11023 | 0.000248257 | 0.099600774 |
| 401.239996 | 8960.177473 | 0.000202219 | 0.08113824  |
| 401.279996 | 6261.716568 | 0.000141318 | 0.056708175 |
| 401.319996 | 3804.975314 | 8.5873E-05  | 0.034462549 |
| 401.359995 | 2060.991805 | 4.65137E-05 | 0.018668744 |
| 401.399995 | 1029.188917 | 2.32274E-05 | 0.009323462 |
| 401.439995 | 541.850391  | 1.22288E-05 | 0.004909133 |
| 401.479995 | 391.817711  | 8.84278E-06 | 0.003550199 |
| 401.519995 | 384.528509  | 8.67827E-06 | 0.0034845   |
| 401.559995 | 467.675465  | 1.05548E-05 | 0.004238379 |
| 401.599995 | 556.849933  | 1.25673E-05 | 0.005047039 |
| 401.639995 | 578.95398   | 1.30662E-05 | 0.005247902 |
| 401.679995 | 501.351445  | 1.13148E-05 | 0.00454493  |
| 401.719995 | 397.718888  | 8.97596E-06 | 0.003605823 |
| 401.759995 | 313.134393  | 7.06701E-06 | 0.002839241 |
| 401.799995 | 287.84652   | 6.4963E-06  | 0.002610211 |
| 401.839995 | 303.793234  | 6.85619E-06 | 0.002755091 |
| 401.879995 | 339.907017  | 7.67123E-06 | 0.003082913 |
| 401.919995 | 460.602786  | 1.03952E-05 | 0.004178024 |
| 401.959995 | 771.295716  | 1.74071E-05 | 0.006996946 |
| 401.999995 | 1389.214739 | 3.13526E-05 | 0.012603762 |
| 402.039995 | 2418.927806 | 5.45918E-05 | 0.0219481   |
| 402.079995 | 3749.161242 | 8.46133E-05 | 0.034021334 |

|            |             |             |             |
|------------|-------------|-------------|-------------|
| 402.119995 | 4988.865631 | 0.000112592 | 0.045275393 |
| 402.159995 | 5559.55012  | 0.000125471 | 0.050459538 |
| 402.199995 | 5262.443675 | 0.000118766 | 0.047767694 |
| 402.239995 | 4268.227565 | 9.6328E-05  | 0.038746955 |
| 402.279995 | 3069.054204 | 6.92643E-05 | 0.027863634 |
| 402.319995 | 1978.461468 | 4.46511E-05 | 0.017964038 |
| 402.359995 | 1150.791448 | 2.59718E-05 | 0.010449997 |
| 402.399995 | 626.136219  | 1.4131E-05  | 0.005686323 |
| 402.439995 | 357.744125  | 8.07379E-06 | 0.003249215 |
| 402.479995 | 295.446146  | 6.66781E-06 | 0.002683659 |
| 402.519995 | 346.826465  | 7.82739E-06 | 0.003150681 |
| 402.559995 | 439.329413  | 9.91505E-06 | 0.003991404 |
| 402.599995 | 522.365098  | 1.17891E-05 | 0.004746273 |
| 402.639995 | 523.445577  | 1.18134E-05 | 0.004756562 |
| 402.679995 | 494.310186  | 1.11559E-05 | 0.004492255 |
| 402.719995 | 440.128629  | 9.93309E-06 | 0.004000254 |
| 402.759995 | 380.898077  | 8.59634E-06 | 0.003462261 |
| 402.799995 | 345.389611  | 7.79496E-06 | 0.003139811 |
| 402.839995 | 369.800193  | 8.34588E-06 | 0.003362052 |
| 402.879995 | 496.135501  | 1.11971E-05 | 0.004511082 |
| 402.919995 | 751.853594  | 1.69683E-05 | 0.006836863 |
| 402.959995 | 1287.669243 | 2.90609E-05 | 0.011710381 |
| 402.999995 | 2388.504177 | 5.39052E-05 | 0.0217238   |
| 403.039995 | 4130.726225 | 9.32247E-05 | 0.037573298 |
| 403.079995 | 6203.415337 | 0.000140002 | 0.056432184 |
| 403.119995 | 8103.187959 | 0.000182878 | 0.073721644 |
| 403.159995 | 9096.014877 | 0.000205284 | 0.082762452 |
| 403.199995 | 8741.528191 | 0.000197284 | 0.079544954 |
| 403.239995 | 7366.067487 | 0.000166242 | 0.067035376 |
| 403.279995 | 5441.119461 | 0.000122798 | 0.049522173 |
| 403.319995 | 3434.971038 | 7.75225E-05 | 0.031266379 |
| 403.359995 | 1907.171337 | 4.30422E-05 | 0.017361502 |
| 403.399995 | 975.316722  | 2.20115E-05 | 0.008879455 |
| 403.439995 | 508.196922  | 1.14693E-05 | 0.004627173 |
| 403.479995 | 339.414146  | 7.6601E-06  | 0.003090699 |
| 403.519995 | 333.264561  | 7.52132E-06 | 0.003035002 |
| 403.559995 | 381.70369   | 8.61452E-06 | 0.003476476 |
| 403.599995 | 455.987443  | 1.0291E-05  | 0.004153448 |
| 403.639995 | 487.070849  | 1.09925E-05 | 0.004437017 |
| 403.679995 | 469.5219    | 1.05965E-05 | 0.004277577 |
| 403.719995 | 446.072179  | 1.00672E-05 | 0.004064341 |
| 403.759995 | 419.543439  | 9.46851E-06 | 0.003823006 |
| 403.799995 | 398.957518  | 9.00392E-06 | 0.003635781 |
| 403.839995 | 396.981563  | 8.95932E-06 | 0.003618132 |
| 403.879995 | 431.02066   | 9.72754E-06 | 0.003928757 |
| 403.919995 | 575.345392  | 1.29847E-05 | 0.005244798 |

|            |             |             |             |
|------------|-------------|-------------|-------------|
| 403.959995 | 853.088643  | 1.9253E-05  | 0.007777451 |
| 403.999995 | 1402.828781 | 3.16599E-05 | 0.012790596 |
| 404.039995 | 2358.016903 | 5.32172E-05 | 0.02150186  |
| 404.079995 | 3509.376665 | 7.92017E-05 | 0.03200384  |
| 404.119995 | 4553.930818 | 0.000102776 | 0.041533786 |
| 404.159995 | 5098.541399 | 0.000115067 | 0.046505469 |
| 404.199995 | 4863.388339 | 0.00010976  | 0.044364951 |
| 404.239995 | 3999.372551 | 9.02603E-05 | 0.03648681  |
| 404.279995 | 2860.579257 | 6.45593E-05 | 0.026100029 |
| 404.319995 | 1844.312478 | 4.16236E-05 | 0.016829239 |
| 404.359995 | 1078.926831 | 2.43499E-05 | 0.009846116 |
| 404.399995 | 580.614971  | 1.31037E-05 | 0.005299125 |
| 404.439995 | 333.710252  | 7.53138E-06 | 0.003045989 |
| 404.479995 | 271.001759  | 6.11613E-06 | 0.002473853 |
| 404.519995 | 314.847036  | 7.10566E-06 | 0.002874381 |
| 404.559995 | 370.524869  | 8.36223E-06 | 0.003383024 |
| 404.599995 | 420.734206  | 9.49538E-06 | 0.003841833 |
| 404.639995 | 478.008892  | 1.0788E-05  | 0.004365254 |
| 404.679995 | 494.874802  | 1.11686E-05 | 0.004519723 |
| 404.719995 | 428.710971  | 9.67541E-06 | 0.003915832 |
| 404.759995 | 330.362714  | 7.45583E-06 | 0.00301782  |
| 404.799995 | 297.689069  | 6.71843E-06 | 0.002719619 |
| 404.839995 | 334.676053  | 7.55317E-06 | 0.003057826 |
| 404.879995 | 447.889827  | 1.01082E-05 | 0.004092628 |
| 404.919995 | 714.063855  | 1.61154E-05 | 0.006525458 |
| 404.959995 | 1262.082933 | 2.84835E-05 | 0.011534659 |
| 404.999995 | 2227.17933  | 5.02643E-05 | 0.020357056 |
| 405.039995 | 3639.813913 | 8.21455E-05 | 0.033272225 |
| 405.079995 | 5302.626036 | 0.000119673 | 0.048477091 |
| 405.119995 | 6746.279075 | 0.000152254 | 0.061681189 |
| 405.159995 | 7387.742041 | 0.000166731 | 0.06755275  |
| 405.199995 | 7007.02599  | 0.000158139 | 0.064077848 |
| 405.239995 | 5791.455216 | 0.000130705 | 0.052966925 |
| 405.279995 | 4135.711387 | 9.33372E-05 | 0.037827718 |
| 405.319995 | 2586.412902 | 5.83717E-05 | 0.023659232 |
| 405.359995 | 1435.565858 | 3.23987E-05 | 0.013133146 |
| 405.399995 | 745.828333  | 1.68323E-05 | 0.006823817 |
| 405.439995 | 436.820436  | 9.85843E-06 | 0.003997001 |
| 405.479995 | 334.047723  | 7.53899E-06 | 0.00305691  |
| 405.519995 | 342.272096  | 7.7246E-06  | 0.003132482 |
| 405.559995 | 452.80966   | 1.02193E-05 | 0.004144532 |
| 405.599995 | 592.198354  | 1.33651E-05 | 0.005420881 |
| 405.639995 | 629.351836  | 1.42036E-05 | 0.005761546 |
| 405.679995 | 576.362827  | 1.30077E-05 | 0.005276966 |
| 405.719995 | 483.678099  | 1.09159E-05 | 0.004428816 |
| 405.759995 | 398.111356  | 8.98482E-06 | 0.00364568  |

|            |             |             |             |
|------------|-------------|-------------|-------------|
| 405.799995 | 357.409859  | 8.06624E-06 | 0.003273281 |
| 405.839995 | 387.505311  | 8.74546E-06 | 0.003549255 |
| 405.879995 | 465.32782   | 1.05018E-05 | 0.004262471 |
| 405.919995 | 592.348137  | 1.33685E-05 | 0.00542653  |
| 405.959995 | 832.673636  | 1.87923E-05 | 0.007628916 |
| 405.999995 | 1304.899491 | 2.94498E-05 | 0.011956604 |
| 406.039995 | 2123.83735  | 4.79321E-05 | 0.01946233  |
| 406.079995 | 3134.035566 | 7.07308E-05 | 0.02872237  |
| 406.119995 | 4007.846881 | 9.04515E-05 | 0.036734172 |
| 406.159995 | 4424.452298 | 9.98537E-05 | 0.040556589 |
| 406.199995 | 4197.828804 | 9.47391E-05 | 0.038483042 |
| 406.239995 | 3469.525717 | 7.83024E-05 | 0.031809551 |
| 406.279995 | 2566.876737 | 5.79308E-05 | 0.023536138 |
| 406.319995 | 1656.45293  | 3.73838E-05 | 0.0151898   |
| 406.359995 | 942.995495  | 2.12821E-05 | 0.008648192 |
| 406.399995 | 511.990598  | 1.15549E-05 | 0.004695917 |
| 406.439995 | 311.34423   | 7.02661E-06 | 0.002855894 |
| 406.479995 | 293.933651  | 6.63367E-06 | 0.002696455 |
| 406.519995 | 383.821654  | 8.66232E-06 | 0.003521406 |
| 406.559995 | 479.265308  | 1.08164E-05 | 0.004397495 |
| 406.599995 | 552.005556  | 1.2458E-05  | 0.005065421 |
| 406.639995 | 595.68457   | 1.34438E-05 | 0.005466775 |
| 406.679995 | 561.809384  | 1.26793E-05 | 0.005156399 |
| 406.719995 | 469.146758  | 1.0588E-05  | 0.004306347 |
| 406.759995 | 385.483862  | 8.69983E-06 | 0.003538744 |
| 406.799995 | 365.950333  | 8.25899E-06 | 0.003359757 |
| 406.839995 | 393.835072  | 8.88831E-06 | 0.00361612  |
| 406.879995 | 478.672292  | 1.0803E-05  | 0.004395511 |
| 406.919995 | 732.295775  | 1.65269E-05 | 0.006725124 |
| 406.959995 | 1292.938932 | 2.91798E-05 | 0.011875024 |
| 406.999995 | 2385.62141  | 5.38402E-05 | 0.021912942 |
| 407.039995 | 4236.143287 | 9.56039E-05 | 0.038914592 |
| 407.079995 | 6729.999398 | 0.000151887 | 0.061830042 |
| 407.119995 | 9615.977117 | 0.000217019 | 0.08835286  |
| 407.159995 | 12151.66546 | 0.000274246 | 0.111662067 |
| 407.199995 | 13459.8311  | 0.00030377  | 0.123694996 |
| 407.239995 | 12837.66962 | 0.000289728 | 0.11798896  |
| 407.279995 | 10370.35411 | 0.000234044 | 0.095321621 |
| 407.319995 | 7110.431118 | 0.000160473 | 0.065363669 |
| 407.359995 | 4215.208193 | 9.51314E-05 | 0.038752718 |
| 407.399995 | 2179.637998 | 4.91914E-05 | 0.020040574 |
| 407.439995 | 1037.055615 | 2.34049E-05 | 0.009536093 |
| 407.479995 | 555.815099  | 1.2544E-05  | 0.005111418 |
| 407.519995 | 461.075884  | 1.04058E-05 | 0.004240588 |
| 407.559995 | 506.235182  | 1.1425E-05  | 0.004656382 |
| 407.599995 | 551.016814  | 1.24357E-05 | 0.005068784 |

|            |             |             |             |
|------------|-------------|-------------|-------------|
| 407.639995 | 552.332752  | 1.24654E-05 | 0.005081388 |
| 407.679995 | 513.931586  | 1.15987E-05 | 0.004728566 |
| 407.719995 | 465.546265  | 1.05067E-05 | 0.004283804 |
| 407.759995 | 378.014974  | 8.53127E-06 | 0.003478711 |
| 407.799995 | 332.933249  | 7.51384E-06 | 0.003064144 |
| 407.839995 | 350.800936  | 7.91709E-06 | 0.003228905 |
| 407.879995 | 385.645686  | 8.70349E-06 | 0.003549978 |
| 407.919995 | 469.443281  | 1.05947E-05 | 0.004321782 |
| 407.959995 | 708.518786  | 1.59903E-05 | 0.006523395 |
| 407.999995 | 1241.687611 | 2.80232E-05 | 0.011433449 |
| 408.039995 | 2174.877109 | 4.90839E-05 | 0.020028213 |
| 408.079995 | 3387.268365 | 7.64459E-05 | 0.031196054 |
| 408.119995 | 4729.310573 | 0.000106734 | 0.04356026  |
| 408.159995 | 5761.543266 | 0.00013003  | 0.053073047 |
| 408.199995 | 6048.75469  | 0.000136512 | 0.055724185 |
| 408.239995 | 5561.134384 | 0.000125507 | 0.051237    |
| 408.279995 | 4406.643147 | 9.94518E-05 | 0.04060418  |
| 408.319995 | 3044.28111  | 6.87052E-05 | 0.028053701 |
| 408.359995 | 1826.641792 | 4.12248E-05 | 0.016834543 |
| 408.399995 | 977.384415  | 2.20582E-05 | 0.009008571 |
| 408.439995 | 533.219591  | 1.2034E-05  | 0.004915176 |
| 408.479995 | 372.717669  | 8.41172E-06 | 0.003436019 |
| 408.519995 | 378.796001  | 8.5489E-06  | 0.003492396 |
| 408.559995 | 496.395062  | 1.12029E-05 | 0.004577075 |
| 408.599995 | 609.114471  | 1.37469E-05 | 0.005616969 |
| 408.639995 | 607.483708  | 1.37101E-05 | 0.005602479 |
| 408.679995 | 542.485604  | 1.22431E-05 | 0.005003528 |
| 408.719995 | 429.3933    | 9.69081E-06 | 0.003960827 |
| 408.759995 | 348.416374  | 7.86327E-06 | 0.003214191 |
| 408.799995 | 333.254909  | 7.5211E-06  | 0.003074625 |
| 408.839995 | 357.775601  | 8.0745E-06  | 0.003301177 |
| 408.879995 | 439.958821  | 9.92926E-06 | 0.004059875 |
| 408.919995 | 673.675564  | 1.52039E-05 | 0.006217187 |
| 408.959995 | 1180.81759  | 2.66494E-05 | 0.010898542 |
| 408.999995 | 2172.37807  | 4.90275E-05 | 0.020052267 |
| 409.039995 | 3614.462913 | 8.15734E-05 | 0.03336678  |
| 409.079995 | 5260.004924 | 0.000118711 | 0.048562289 |
| 409.119995 | 6881.276933 | 0.000155301 | 0.063536677 |
| 409.159995 | 7929.32189  | 0.000178954 | 0.073220716 |
| 409.199995 | 8110.874336 | 0.000183051 | 0.074904524 |
| 409.239995 | 7208.388184 | 0.000162683 | 0.066576505 |
| 409.279995 | 5507.741323 | 0.000124302 | 0.050874342 |
| 409.319995 | 3652.900543 | 8.24409E-05 | 0.033744699 |
| 409.359995 | 2175.816346 | 4.91051E-05 | 0.020101682 |
| 409.399995 | 1221.406516 | 2.75654E-05 | 0.011285293 |
| 409.439995 | 672.774624  | 1.51836E-05 | 0.006216767 |

|            |             |             |             |
|------------|-------------|-------------|-------------|
| 409.479995 | 426.898905  | 9.63451E-06 | 0.003945141 |
| 409.519995 | 403.478271  | 9.10594E-06 | 0.003729066 |
| 409.559995 | 446.655261  | 1.00804E-05 | 0.004128523 |
| 409.599995 | 515.737267  | 1.16395E-05 | 0.004767528 |
| 409.639995 | 577.274551  | 1.30283E-05 | 0.005336906 |
| 409.679995 | 563.368998  | 1.27145E-05 | 0.005208857 |
| 409.719995 | 499.46934   | 1.12723E-05 | 0.004618498 |
| 409.759995 | 409.224466  | 9.23563E-06 | 0.00378439  |
| 409.799995 | 334.997183  | 7.56042E-06 | 0.00309826  |
| 409.839995 | 306.439208  | 6.91591E-06 | 0.002834415 |
| 409.879995 | 333.619076  | 7.52932E-06 | 0.003086117 |
| 409.919995 | 444.802415  | 1.00386E-05 | 0.004115011 |
| 409.959995 | 694.947826  | 1.5684E-05  | 0.006429814 |
| 409.999995 | 1183.791514 | 2.67165E-05 | 0.010953775 |
| 410.039995 | 2021.428072 | 4.56208E-05 | 0.018706359 |
| 410.079995 | 3053.430666 | 6.89117E-05 | 0.0282593   |
| 410.119995 | 3968.380698 | 8.95608E-05 | 0.036730685 |
| 410.159995 | 4501.071841 | 0.000101583 | 0.041665251 |
| 410.199995 | 4443.939693 | 0.000100294 | 0.041140405 |
| 410.239995 | 3863.092302 | 8.71846E-05 | 0.035766615 |
| 410.279995 | 2968.40793  | 6.69928E-05 | 0.027485819 |
| 410.319995 | 2022.056248 | 4.5635E-05  | 0.01872495  |
| 410.359995 | 1251.608007 | 2.8247E-05  | 0.011591459 |
| 410.399995 | 755.294293  | 1.70459E-05 | 0.006995654 |
| 410.439995 | 517.445714  | 1.1678E-05  | 0.00479313  |
| 410.479995 | 429.615743  | 9.69583E-06 | 0.003979944 |
| 410.519995 | 415.916272  | 9.38665E-06 | 0.003853408 |
| 410.559995 | 439.756097  | 9.92468E-06 | 0.004074678 |
| 410.599995 | 465.591331  | 1.05077E-05 | 0.004314481 |
| 410.639995 | 515.094892  | 1.1625E-05  | 0.004773679 |
| 410.679995 | 548.865583  | 1.23871E-05 | 0.005087147 |
| 410.719995 | 506.234463  | 1.1425E-05  | 0.004692479 |
| 410.759995 | 417.113619  | 9.41367E-06 | 0.00386676  |
| 410.799995 | 360.264693  | 8.13067E-06 | 0.00334008  |
| 410.839995 | 351.788858  | 7.93938E-06 | 0.003261817 |
| 410.879995 | 418.900736  | 9.45401E-06 | 0.003884462 |
| 410.919995 | 626.813323  | 1.41463E-05 | 0.005812999 |
| 410.959995 | 1086.022196 | 2.451E-05   | 0.010072633 |
| 410.999995 | 1961.244245 | 4.42626E-05 | 0.018191908 |
| 411.039995 | 3237.6374   | 7.3069E-05  | 0.030034268 |
| 411.079995 | 4809.299762 | 0.000108539 | 0.044618292 |
| 411.119995 | 6300.568118 | 0.000142195 | 0.058459227 |
| 411.159995 | 7098.522974 | 0.000160204 | 0.065869384 |
| 411.199995 | 7078.880262 | 0.00015976  | 0.065693503 |
| 411.239995 | 6277.092659 | 0.000141665 | 0.058258412 |
| 411.279995 | 4822.928911 | 0.000108847 | 0.044766506 |

|            |             |             |             |
|------------|-------------|-------------|-------------|
| 411.319995 | 3215.108335 | 7.25605E-05 | 0.029845591 |
| 411.359995 | 1891.43863  | 4.26871E-05 | 0.01755978  |
| 411.399995 | 1025.731575 | 2.31493E-05 | 0.009523635 |
| 411.439995 | 577.984872  | 1.30443E-05 | 0.005366952 |
| 411.479995 | 391.822786  | 8.84289E-06 | 0.003638674 |
| 411.519995 | 355.936791  | 8.033E-06   | 0.003305739 |
| 411.559995 | 418.566776  | 9.44647E-06 | 0.003887789 |
| 411.599995 | 506.250961  | 1.14254E-05 | 0.004702686 |
| 411.639995 | 527.323313  | 1.1901E-05  | 0.004898908 |
| 411.679995 | 492.592654  | 1.11171E-05 | 0.0045767   |
| 411.719995 | 429.993516  | 9.70435E-06 | 0.003995477 |
| 411.759995 | 362.815717  | 8.18825E-06 | 0.003371592 |
| 411.799995 | 350.617398  | 7.91295E-06 | 0.003258551 |
| 411.839995 | 371.9255    | 8.39384E-06 | 0.003456919 |
| 411.879995 | 417.031935  | 9.41183E-06 | 0.003876544 |
| 411.919995 | 499.928467  | 1.12827E-05 | 0.004647565 |
| 411.959995 | 711.947961  | 1.60677E-05 | 0.006619239 |
| 411.999995 | 1221.120411 | 2.7559E-05  | 0.011354302 |
| 412.039995 | 2010.18976  | 4.53672E-05 | 0.018693094 |
| 412.079995 | 2914.59485  | 6.57783E-05 | 0.027105941 |
| 412.119995 | 3728.149647 | 8.41391E-05 | 0.034675424 |
| 412.159995 | 4221.797777 | 9.52801E-05 | 0.039270644 |
| 412.199995 | 4279.631425 | 9.65853E-05 | 0.039812469 |
| 412.239995 | 3770.648163 | 8.50983E-05 | 0.035080913 |
| 412.279995 | 3001.518499 | 6.77401E-05 | 0.027927885 |
| 412.319995 | 2176.660868 | 4.91242E-05 | 0.020254892 |
| 412.359995 | 1425.946644 | 3.21816E-05 | 0.013270417 |
| 412.399995 | 869.455002  | 1.96224E-05 | 0.008092273 |
| 412.439995 | 525.001431  | 1.18486E-05 | 0.004886816 |
| 412.479995 | 374.63489   | 8.45499E-06 | 0.003487513 |
| 412.519995 | 355.531469  | 8.02385E-06 | 0.003309999 |
| 412.559995 | 415.517095  | 9.37764E-06 | 0.00386884  |
| 412.599995 | 508.421025  | 1.14744E-05 | 0.004734319 |
| 412.639995 | 557.099804  | 1.2573E-05  | 0.005188109 |
| 412.679995 | 514.037272  | 1.16011E-05 | 0.004787544 |
| 412.719995 | 434.980323  | 9.8169E-06  | 0.004051631 |
| 412.759995 | 344.348462  | 7.77147E-06 | 0.00320775  |
| 412.799995 | 283.484607  | 6.39785E-06 | 0.002641034 |
| 412.839995 | 306.832392  | 6.92478E-06 | 0.002858826 |
| 412.879995 | 381.133835  | 8.60166E-06 | 0.003551453 |
| 412.919995 | 590.022217  | 1.3316E-05  | 0.005498434 |
| 412.959995 | 1058.206679 | 2.38823E-05 | 0.009862414 |
| 412.999995 | 1937.33127  | 4.37229E-05 | 0.018057544 |
| 413.039995 | 3293.996846 | 7.43409E-05 | 0.030705773 |
| 413.079995 | 4744.130995 | 0.000107068 | 0.044227826 |
| 413.119995 | 5892.632376 | 0.000132989 | 0.054940211 |



|            |             |             |             |
|------------|-------------|-------------|-------------|
| 413.159995 | 6466.533158 | 0.000145941 | 0.060296837 |
| 413.199995 | 6240.357936 | 0.000140836 | 0.058193512 |
| 413.239995 | 5401.51755  | 0.000121905 | 0.050375909 |
| 413.279995 | 4256.334682 | 9.60595E-05 | 0.039699488 |
| 413.319995 | 3042.856007 | 6.8673E-05  | 0.028383933 |
| 413.359995 | 1960.915043 | 4.42551E-05 | 0.018293297 |
| 413.399995 | 1138.434532 | 2.56929E-05 | 0.010621437 |
| 413.439995 | 623.320495  | 1.40675E-05 | 0.005816057 |
| 413.479995 | 395.022065  | 8.9151E-06  | 0.003686215 |
| 413.519995 | 355.467756  | 8.02241E-06 | 0.003317428 |
| 413.559995 | 414.330824  | 9.35087E-06 | 0.003867146 |
| 413.599995 | 482.235965  | 1.08834E-05 | 0.004501372 |
| 413.639995 | 521.005386  | 1.17584E-05 | 0.00486373  |
| 413.679995 | 487.290313  | 1.09975E-05 | 0.004549431 |
| 413.719995 | 414.350901  | 9.35132E-06 | 0.003868829 |
| 413.759995 | 338.644148  | 7.64273E-06 | 0.003162255 |
| 413.799995 | 279.072909  | 6.29829E-06 | 0.002606231 |
| 413.839995 | 268.384833  | 6.05707E-06 | 0.002506659 |
| 413.879995 | 318.318438  | 7.184E-06   | 0.002973315 |
| 413.919995 | 428.441129  | 9.66932E-06 | 0.004002325 |
| 413.959995 | 705.931039  | 1.59319E-05 | 0.006595161 |
| 413.999995 | 1320.286101 | 2.9797E-05  | 0.012335965 |
| 414.039995 | 2362.635413 | 5.33214E-05 | 0.022077188 |
| 414.079995 | 3628.167196 | 8.18827E-05 | 0.03390598  |
| 414.119995 | 4758.937924 | 0.000107403 | 0.044477564 |
| 414.159995 | 5539.407121 | 0.000125017 | 0.051776917 |
| 414.199995 | 5721.824849 | 0.000129134 | 0.053487144 |
| 414.239995 | 5212.555691 | 0.00011764  | 0.048731243 |
| 414.279995 | 4180.511495 | 9.43483E-05 | 0.039086622 |
| 414.319995 | 3015.397268 | 6.80533E-05 | 0.02819585  |
| 414.359995 | 1957.057638 | 4.41681E-05 | 0.018301479 |
| 414.399995 | 1146.683455 | 2.5879E-05  | 0.010724278 |
| 414.439995 | 652.665827  | 1.47298E-05 | 0.006104601 |
| 414.479995 | 437.072377  | 9.86411E-06 | 0.004088478 |
| 414.519995 | 404.566612  | 9.1305E-06  | 0.003784777 |
| 414.559995 | 460.97044   | 1.04035E-05 | 0.004312859 |
| 414.599995 | 541.649873  | 1.22243E-05 | 0.005068188 |
| 414.639995 | 569.621575  | 1.28556E-05 | 0.005330432 |
| 414.679995 | 542.683732  | 1.22476E-05 | 0.005078841 |
| 414.719995 | 488.115113  | 1.10161E-05 | 0.004568588 |
| 414.759995 | 406.58962   | 9.17616E-06 | 0.003805905 |
| 414.799995 | 346.253178  | 7.81445E-06 | 0.003241435 |
| 414.839995 | 355.929037  | 8.03282E-06 | 0.003332336 |
| 414.879995 | 441.365477  | 9.961E-06   | 0.004132621 |
| 414.919995 | 651.886886  | 1.47122E-05 | 0.006104377 |
| 414.959995 | 1146.615636 | 2.58775E-05 | 0.010738135 |

|            |             |             |             |
|------------|-------------|-------------|-------------|
| 414.999995 | 2040.330924 | 4.60474E-05 | 0.019109682 |
| 415.039995 | 3421.991443 | 7.72296E-05 | 0.032053365 |
| 415.079995 | 5080.078281 | 0.00011465  | 0.047589042 |
| 415.119995 | 6437.223176 | 0.000145279 | 0.060308284 |
| 415.159995 | 7161.2974   | 0.000161621 | 0.067098369 |
| 415.199995 | 7060.630906 | 0.000159349 | 0.06616154  |
| 415.239995 | 6159.306966 | 0.000139007 | 0.057721257 |
| 415.279995 | 4801.230224 | 0.000108357 | 0.044998527 |
| 415.319995 | 3330.234023 | 7.51587E-05 | 0.031214929 |
| 415.359995 | 2000.336426 | 4.51448E-05 | 0.018751347 |
| 415.399995 | 1067.539961 | 2.40929E-05 | 0.010008186 |
| 415.439995 | 563.804421  | 1.27243E-05 | 0.005286175 |
| 415.479995 | 341.54938   | 7.70829E-06 | 0.003202642 |
| 415.519995 | 345.80934   | 7.80444E-06 | 0.003242899 |
| 415.559995 | 436.355974  | 9.84795E-06 | 0.004092413 |
| 415.599995 | 518.808562  | 1.17088E-05 | 0.004866172 |
| 415.639995 | 569.030695  | 1.28422E-05 | 0.005337744 |
| 415.679995 | 541.75913   | 1.22267E-05 | 0.005082415 |
| 415.719995 | 437.312191  | 9.86953E-06 | 0.00410296  |
| 415.759995 | 314.136632  | 7.08963E-06 | 0.002947583 |
| 415.799995 | 245.825245  | 5.54793E-06 | 0.002306831 |
| 415.839995 | 250.350767  | 5.65007E-06 | 0.002349524 |
| 415.879995 | 306.744263  | 6.92279E-06 | 0.00287905  |
| 415.919995 | 433.607075  | 9.78591E-06 | 0.004070155 |
| 415.959995 | 719.14727   | 1.62302E-05 | 0.006751094 |
| 415.999995 | 1321.250498 | 2.98188E-05 | 0.012404614 |
| 416.039995 | 2263.113602 | 5.10753E-05 | 0.021249377 |
| 416.079995 | 3429.475467 | 7.73985E-05 | 0.032203961 |
| 416.119995 | 4448.266282 | 0.000100391 | 0.041774775 |
| 416.159995 | 5035.07371  | 0.000113635 | 0.047290175 |
| 416.199995 | 5047.004236 | 0.000113904 | 0.047406784 |
| 416.239995 | 4508.303234 | 0.000101746 | 0.042350806 |
| 416.279995 | 3563.415953 | 8.04213E-05 | 0.033477793 |
| 416.319995 | 2523.754787 | 5.69576E-05 | 0.0237126   |
| 416.359995 | 1611.638616 | 3.63724E-05 | 0.015144028 |
| 416.399995 | 950.762102  | 2.14574E-05 | 0.008934851 |
| 416.439995 | 541.25214   | 1.22153E-05 | 0.005086942 |
| 416.479995 | 364.110612  | 8.21747E-06 | 0.003422412 |
| 416.519995 | 372.376126  | 8.40401E-06 | 0.003500438 |
| 416.559995 | 443.402545  | 1.0007E-05  | 0.004168507 |
| 416.599995 | 511.053357  | 1.15338E-05 | 0.004804965 |
| 416.639995 | 553.365691  | 1.24887E-05 | 0.005203289 |
| 416.679995 | 530.144617  | 1.19646E-05 | 0.00498542  |
| 416.719995 | 485.646755  | 1.09604E-05 | 0.004567406 |
| 416.759995 | 428.35631   | 9.66741E-06 | 0.004028988 |
| 416.799995 | 380.371419  | 8.58445E-06 | 0.003578    |

|            |             |             |             |
|------------|-------------|-------------|-------------|
| 416.839995 | 394.381912  | 8.90065E-06 | 0.003710147 |
| 416.879995 | 508.814253  | 1.14832E-05 | 0.004787128 |
| 416.919995 | 758.341481  | 1.71147E-05 | 0.007135465 |
| 416.959995 | 1326.08921  | 2.9928E-05  | 0.012478773 |
| 416.999995 | 2482.535635 | 5.60274E-05 | 0.023363414 |
| 417.039995 | 4326.244295 | 9.76373E-05 | 0.040718662 |
| 417.079995 | 6515.590486 | 0.000147048 | 0.061330696 |
| 417.119995 | 8398.008765 | 0.000189531 | 0.07905732  |
| 417.159995 | 9412.22588  | 0.000212421 | 0.088613472 |
| 417.199995 | 9133.858971 | 0.000206138 | 0.086000971 |
| 417.239995 | 7767.846994 | 0.000175309 | 0.073146129 |
| 417.279995 | 5795.713129 | 0.000130801 | 0.054580713 |
| 417.319995 | 3720.967487 | 8.39771E-05 | 0.035045303 |
| 417.359995 | 2068.840518 | 4.66908E-05 | 0.019486892 |
| 417.399995 | 1046.886918 | 2.36268E-05 | 0.009861818 |
| 417.439995 | 542.669259  | 1.22473E-05 | 0.005112508 |
| 417.479995 | 353.39032   | 7.97553E-06 | 0.003329623 |
| 417.519995 | 349.858976  | 7.89583E-06 | 0.003296667 |
| 417.559995 | 412.771097  | 9.31567E-06 | 0.003889851 |
| 417.599995 | 497.496797  | 1.12278E-05 | 0.004688733 |
| 417.639995 | 522.984808  | 1.1803E-05  | 0.004929421 |
| 417.679995 | 530.339539  | 1.1969E-05  | 0.004999222 |
| 417.719995 | 463.657126  | 1.04641E-05 | 0.004371062 |
| 417.759995 | 340.521865  | 7.6851E-06  | 0.003210529 |
| 417.799995 | 285.360994  | 6.4402E-06  | 0.002690716 |
| 417.839995 | 274.392065  | 6.19265E-06 | 0.002587535 |
| 417.879995 | 296.889252  | 6.70038E-06 | 0.002799953 |
| 417.919995 | 395.911193  | 8.93516E-06 | 0.003734184 |
| 417.959995 | 630.664379  | 1.42332E-05 | 0.005948915 |
| 417.999995 | 1112.805009 | 2.51145E-05 | 0.010497844 |
| 418.039995 | 1976.830998 | 4.46143E-05 | 0.018650571 |
| 418.079995 | 3084.827292 | 6.96203E-05 | 0.029106836 |
| 418.119995 | 4168.426741 | 9.40756E-05 | 0.039334883 |
| 418.159995 | 4814.497448 | 0.000108657 | 0.045435802 |
| 418.199995 | 4937.62411  | 0.000111435 | 0.046602241 |
| 418.239995 | 4528.892587 | 0.000102211 | 0.042748643 |
| 418.279995 | 3587.310972 | 8.09606E-05 | 0.033864204 |
| 418.319995 | 2492.310653 | 5.6248E-05  | 0.023529655 |
| 418.359995 | 1568.482434 | 3.53985E-05 | 0.014809301 |
| 418.399995 | 926.370679  | 2.09069E-05 | 0.008747445 |
| 418.439995 | 532.010147  | 1.20067E-05 | 0.005024095 |
| 418.479995 | 347.580643  | 7.84441E-06 | 0.003282729 |
| 418.519995 | 321.838653  | 7.26345E-06 | 0.003039899 |
| 418.559995 | 361.947704  | 8.16866E-06 | 0.003419072 |
| 418.599995 | 431.2113    | 9.73184E-06 | 0.004073748 |
| 418.639995 | 475.581913  | 1.07332E-05 | 0.004493356 |

|            |             |             |             |
|------------|-------------|-------------|-------------|
| 418.679995 | 484.866306  | 1.09428E-05 | 0.004581514 |
| 418.719995 | 439.697383  | 9.92336E-06 | 0.004155108 |
| 418.759995 | 372.854295  | 8.4148E-06  | 0.003523782 |
| 418.799995 | 320.487931  | 7.23297E-06 | 0.003029166 |
| 418.839995 | 331.144113  | 7.47346E-06 | 0.003130185 |
| 418.879995 | 421.988008  | 9.52368E-06 | 0.00398928  |
| 418.919995 | 627.941295  | 1.41718E-05 | 0.005936834 |
| 418.959995 | 1163.619134 | 2.62613E-05 | 0.011002419 |
| 418.999995 | 2185.803751 | 4.93305E-05 | 0.020669499 |
| 419.039995 | 3776.593012 | 8.52324E-05 | 0.035715803 |
| 419.079995 | 5567.243402 | 0.000125645 | 0.052655276 |
| 419.119995 | 7110.616411 | 0.000160477 | 0.067258997 |
| 419.159995 | 8014.215571 | 0.00018087  | 0.075813335 |
| 419.199995 | 7999.505213 | 0.000180538 | 0.075681399 |
| 419.239995 | 6972.885879 | 0.000157368 | 0.065975094 |
| 419.279995 | 5374.635945 | 0.000121298 | 0.050857845 |
| 419.319995 | 3650.014883 | 8.23758E-05 | 0.0345418   |
| 419.359995 | 2166.727439 | 4.89E-05    | 0.020506712 |
| 419.399995 | 1150.806676 | 2.59721E-05 | 0.0108927   |
| 419.439995 | 601.529317  | 1.35757E-05 | 0.005694183 |
| 419.479995 | 374.079239  | 8.44245E-06 | 0.003541438 |
| 419.519995 | 352.304361  | 7.95102E-06 | 0.003335611 |
| 419.559995 | 398.510052  | 8.99382E-06 | 0.003773446 |
| 419.599995 | 456.667859  | 1.03064E-05 | 0.004324548 |
| 419.639995 | 510.146189  | 1.15133E-05 | 0.004831437 |
| 419.679995 | 503.889938  | 1.13721E-05 | 0.00477264  |
| 419.719995 | 444.73961   | 1.00372E-05 | 0.004212794 |
| 419.759995 | 354.205605  | 7.99393E-06 | 0.003355531 |
| 419.799995 | 307.947785  | 6.94995E-06 | 0.00291759  |
| 419.839995 | 322.049798  | 7.26822E-06 | 0.003051488 |
| 419.879995 | 375.58359   | 8.4764E-06  | 0.00355907  |
| 419.919995 | 479.334107  | 1.08179E-05 | 0.004542654 |
| 419.959995 | 730.736057  | 1.64917E-05 | 0.006925852 |
| 419.999995 | 1245.19542  | 2.81023E-05 | 0.011802977 |
| 420.039995 | 2019.606876 | 4.55797E-05 | 0.019145303 |
| 420.079995 | 2939.098529 | 6.63314E-05 | 0.027864477 |
| 420.119995 | 3818.90766  | 8.61874E-05 | 0.036209061 |
| 420.159995 | 4405.933098 | 9.94358E-05 | 0.041778934 |
| 420.199995 | 4463.969139 | 0.000100746 | 0.042333286 |
| 420.239995 | 3977.230974 | 8.97606E-05 | 0.037720979 |
| 420.279995 | 3220.447872 | 7.2681E-05  | 0.03054638  |
| 420.319995 | 2363.336724 | 5.33372E-05 | 0.022418699 |
| 420.359995 | 1549.308762 | 3.49657E-05 | 0.014698199 |
| 420.399995 | 925.283105  | 2.08824E-05 | 0.00877894  |
| 420.439995 | 538.680405  | 1.21573E-05 | 0.005111401 |
| 420.479995 | 391.383893  | 8.83299E-06 | 0.003714095 |

|            |             |             |             |
|------------|-------------|-------------|-------------|
| 420.519995 | 400.757205  | 9.04453E-06 | 0.003803407 |
| 420.559995 | 474.295774  | 1.07042E-05 | 0.004501756 |
| 420.599995 | 549.583876  | 1.24033E-05 | 0.005216846 |
| 420.639995 | 595.895819  | 1.34485E-05 | 0.005656993 |
| 420.679995 | 542.200505  | 1.22367E-05 | 0.005147739 |
| 420.719995 | 439.758153  | 9.92473E-06 | 0.004175532 |
| 420.759995 | 372.878482  | 8.41535E-06 | 0.003540842 |
| 420.799995 | 331.650066  | 7.48488E-06 | 0.003149637 |
| 420.839995 | 315.741131  | 7.12584E-06 | 0.002998837 |
| 420.879995 | 376.602763  | 8.4994E-06  | 0.003577227 |
| 420.919995 | 584.700589  | 1.31959E-05 | 0.005554409 |
| 420.959995 | 1123.778076 | 2.53621E-05 | 0.010676432 |
| 420.999995 | 2125.309216 | 4.79653E-05 | 0.020193378 |
| 421.039995 | 3577.908496 | 8.07484E-05 | 0.033998311 |
| 421.079995 | 5193.141649 | 0.000117202 | 0.049351406 |
| 421.119995 | 6459.399237 | 0.00014578  | 0.061390723 |
| 421.159995 | 7119.638672 | 0.00016068  | 0.067672126 |
| 421.199995 | 7079.764089 | 0.00015978  | 0.06729951  |
| 421.239995 | 6400.7767   | 0.000144457 | 0.060850904 |
| 421.279995 | 5309.741195 | 0.000119833 | 0.050483441 |
| 421.319995 | 4007.884017 | 9.04524E-05 | 0.038109388 |
| 421.359995 | 2708.597425 | 6.11293E-05 | 0.025757429 |
| 421.399995 | 1689.350888 | 3.81263E-05 | 0.016066421 |
| 421.439995 | 1022.574667 | 2.30781E-05 | 0.009726028 |
| 421.479995 | 670.663758  | 1.51359E-05 | 0.006379499 |
| 421.519995 | 539.515715  | 1.21761E-05 | 0.005132477 |
| 421.559995 | 499.359465  | 1.12698E-05 | 0.004750917 |
| 421.599995 | 497.449534  | 1.12267E-05 | 0.004733195 |
| 421.639995 | 508.084199  | 1.14668E-05 | 0.004834842 |
| 421.679995 | 492.645905  | 1.11183E-05 | 0.004688378 |
| 421.719995 | 429.139132  | 9.68507E-06 | 0.004084389 |
| 421.759995 | 348.710097  | 7.8699E-06  | 0.003319209 |
| 421.799995 | 290.685037  | 6.56036E-06 | 0.002767158 |
| 421.839995 | 310.980437  | 7.0184E-06  | 0.00296064  |
| 421.879995 | 375.927409  | 8.48416E-06 | 0.003579297 |
| 421.919995 | 470.850523  | 1.06264E-05 | 0.004483508 |
| 421.959995 | 680.686486  | 1.53621E-05 | 0.006482211 |
| 421.999995 | 1177.274673 | 2.65694E-05 | 0.011212308 |
| 422.039995 | 1949.685664 | 4.40017E-05 | 0.018570473 |
| 422.079995 | 2823.130478 | 6.37141E-05 | 0.026892457 |
| 422.119995 | 3552.015855 | 8.01641E-05 | 0.033838849 |
| 422.159995 | 3955.045304 | 8.92599E-05 | 0.037681944 |
| 422.199995 | 3971.62709  | 8.96341E-05 | 0.037843513 |
| 422.239995 | 3610.949664 | 8.14941E-05 | 0.03441007  |
| 422.279995 | 2980.426083 | 6.72641E-05 | 0.028404269 |
| 422.319995 | 2224.268692 | 5.01986E-05 | 0.021199892 |

|            |             |             |             |
|------------|-------------|-------------|-------------|
| 422.359995 | 1538.469733 | 3.47211E-05 | 0.014664812 |
| 422.399995 | 1001.9408   | 2.26124E-05 | 0.009551481 |
| 422.439995 | 654.567885  | 1.47727E-05 | 0.006240573 |
| 422.479995 | 470.009579  | 1.06075E-05 | 0.00448144  |
| 422.519995 | 420.024262  | 9.47936E-06 | 0.00400522  |
| 422.559995 | 463.466198  | 1.04598E-05 | 0.004419887 |
| 422.599995 | 532.832724  | 1.20253E-05 | 0.005081889 |
| 422.639995 | 562.375671  | 1.2692E-05  | 0.005364162 |
| 422.679995 | 524.293334  | 1.18326E-05 | 0.005001391 |
| 422.719995 | 476.20372   | 1.07473E-05 | 0.004543079 |
| 422.759995 | 393.134149  | 8.87249E-06 | 0.003750934 |
| 422.799995 | 307.740445  | 6.94527E-06 | 0.002936461 |
| 422.839995 | 294.336526  | 6.64277E-06 | 0.002808827 |
| 422.879995 | 370.557711  | 8.36297E-06 | 0.003536533 |
| 422.919995 | 580.830153  | 1.31085E-05 | 0.005543858 |
| 422.959995 | 1063.381475 | 2.3999E-05  | 0.010150633 |
| 422.999995 | 1940.150603 | 4.37865E-05 | 0.018521688 |
| 423.039995 | 3212.084687 | 7.24923E-05 | 0.030667133 |
| 423.079995 | 4858.157333 | 0.000109642 | 0.046387271 |
| 423.119995 | 6319.622197 | 0.000142625 | 0.060347519 |
| 423.159995 | 7148.014448 | 0.000161321 | 0.068264479 |
| 423.199995 | 7295.152714 | 0.000164641 | 0.069676255 |
| 423.239995 | 6444.46015  | 0.000145442 | 0.061557078 |
| 423.279995 | 4988.975904 | 0.000112594 | 0.047658888 |
| 423.319995 | 3493.547874 | 7.88445E-05 | 0.033376457 |
| 423.359995 | 2209.410044 | 4.98633E-05 | 0.02111013  |
| 423.399995 | 1303.291104 | 2.94135E-05 | 0.012453661 |
| 423.439995 | 748.37041   | 1.68897E-05 | 0.007151765 |
| 423.479995 | 482.840111  | 1.0897E-05  | 0.004614674 |
| 423.519995 | 441.714794  | 9.96889E-06 | 0.004222023 |
| 423.559995 | 493.764016  | 1.11436E-05 | 0.004719969 |
| 423.599995 | 520.274795  | 1.17419E-05 | 0.004973859 |
| 423.639995 | 518.055066  | 1.16918E-05 | 0.004953106 |
| 423.679995 | 520.043375  | 1.17367E-05 | 0.004972586 |
| 423.719995 | 484.363605  | 1.09314E-05 | 0.004631858 |
| 423.759995 | 396.427788  | 8.94682E-06 | 0.003791306 |
| 423.799995 | 322.802351  | 7.2852E-06  | 0.003087467 |
| 423.839995 | 300.960056  | 6.79225E-06 | 0.002878827 |
| 423.879995 | 343.133333  | 7.74404E-06 | 0.003282544 |
| 423.919995 | 460.551919  | 1.0394E-05  | 0.004406231 |
| 423.959995 | 697.987374  | 1.57526E-05 | 0.006678473 |
| 423.999995 | 1156.804568 | 2.61075E-05 | 0.011069566 |
| 424.039995 | 1897.652168 | 4.28274E-05 | 0.018160516 |
| 424.079995 | 2766.810249 | 6.24431E-05 | 0.02648085  |
| 424.119995 | 3586.764867 | 8.09483E-05 | 0.034331787 |
| 424.159995 | 4124.099297 | 9.30752E-05 | 0.039478767 |

|            |             |             |             |
|------------|-------------|-------------|-------------|
| 424.199995 | 4029.962012 | 9.09506E-05 | 0.038581257 |
| 424.239995 | 3434.708575 | 7.75166E-05 | 0.032885637 |
| 424.279995 | 2658.984572 | 6.00096E-05 | 0.025460864 |
| 424.319995 | 1864.797327 | 4.20859E-05 | 0.01785788  |
| 424.359995 | 1213.980764 | 2.73979E-05 | 0.011626554 |
| 424.399995 | 759.021497  | 1.71301E-05 | 0.007269997 |
| 424.439995 | 477.482531  | 1.07761E-05 | 0.004573814 |
| 424.479995 | 343.349258  | 7.74891E-06 | 0.003289259 |
| 424.519995 | 328.120591  | 7.40522E-06 | 0.003143666 |
| 424.559995 | 408.76035   | 9.22515E-06 | 0.00391663  |
| 424.599995 | 498.421338  | 1.12487E-05 | 0.004776187 |
| 424.639995 | 537.844742  | 1.21384E-05 | 0.005154453 |
| 424.679995 | 520.072924  | 1.17373E-05 | 0.004984606 |
| 424.719995 | 466.494088  | 1.05281E-05 | 0.004471504 |
| 424.759995 | 403.40883   | 9.10438E-06 | 0.003867174 |
| 424.799995 | 392.733857  | 8.86346E-06 | 0.003765196 |
| 424.839995 | 460.737667  | 1.03982E-05 | 0.004417574 |
| 424.879995 | 599.953446  | 1.35401E-05 | 0.005752923 |
| 424.919995 | 852.047939  | 1.92295E-05 | 0.008171014 |
| 424.959995 | 1355.489075 | 3.05915E-05 | 0.013000164 |
| 424.999995 | 2215.734438 | 5.0006E-05  | 0.021252567 |
| 425.039995 | 3623.921093 | 8.17869E-05 | 0.034762683 |
| 425.079995 | 5356.257563 | 0.000120883 | 0.051385061 |
| 425.119995 | 6859.916239 | 0.000154819 | 0.065816548 |
| 425.159995 | 7679.227166 | 0.000173309 | 0.07368425  |
| 425.199995 | 7489.684418 | 0.000169032 | 0.071872297 |
| 425.239995 | 6408.18142  | 0.000144624 | 0.061499794 |
| 425.279995 | 4855.246403 | 0.000109576 | 0.046600544 |
| 425.319995 | 3332.867883 | 7.52182E-05 | 0.031991798 |
| 425.359995 | 2113.977562 | 4.77095E-05 | 0.020293725 |
| 425.399995 | 1257.446826 | 2.83788E-05 | 0.012072351 |
| 425.439995 | 716.224863  | 1.61642E-05 | 0.006876896 |
| 425.479995 | 439.929153  | 9.92859E-06 | 0.004224416 |
| 425.519995 | 349.289642  | 7.88298E-06 | 0.003354366 |
| 425.559995 | 374.80245   | 8.45877E-06 | 0.003599714 |
| 425.599995 | 481.663352  | 1.08705E-05 | 0.004626472 |
| 425.639995 | 536.239372  | 1.21022E-05 | 0.00515117  |
| 425.679995 | 518.819827  | 1.1709E-05  | 0.004984304 |
| 425.719995 | 453.457762  | 1.02339E-05 | 0.00435678  |
| 425.759995 | 381.990482  | 8.62099E-06 | 0.003670474 |
| 425.799995 | 331.543564  | 7.48248E-06 | 0.003186038 |
| 425.839995 | 319.142516  | 7.2026E-06  | 0.003067156 |
| 425.879995 | 345.372236  | 7.79457E-06 | 0.003319552 |
| 425.919995 | 446.586633  | 1.00788E-05 | 0.004292779 |
| 425.959995 | 722.026412  | 1.62951E-05 | 0.006941074 |
| 425.999995 | 1289.09809  | 2.90931E-05 | 0.012393681 |

|            |             |             |             |
|------------|-------------|-------------|-------------|
| 426.039995 | 2185.601884 | 4.9326E-05  | 0.021014845 |
| 426.079995 | 3220.757143 | 7.2688E-05  | 0.030970904 |
| 426.119995 | 4035.975983 | 9.10864E-05 | 0.038813718 |
| 426.159995 | 4466.837242 | 0.00010081  | 0.042961315 |
| 426.199995 | 4408.691854 | 9.9498E-05  | 0.042406062 |
| 426.239995 | 3884.009789 | 8.76567E-05 | 0.037362788 |
| 426.279995 | 3057.770809 | 6.90096E-05 | 0.029417424 |
| 426.319995 | 2147.567333 | 4.84676E-05 | 0.020662708 |
| 426.359995 | 1346.230069 | 3.03825E-05 | 0.012953899 |
| 426.399995 | 778.311205  | 1.75654E-05 | 0.007489886 |
| 426.439995 | 479.60839   | 1.08241E-05 | 0.004615826 |
| 426.479995 | 363.030063  | 8.19308E-06 | 0.003494186 |
| 426.519995 | 370.947992  | 8.37178E-06 | 0.003570731 |
| 426.559995 | 471.60196   | 1.06434E-05 | 0.004540048 |
| 426.599995 | 612.415176  | 1.38214E-05 | 0.005896191 |
| 426.639995 | 690.579483  | 1.55854E-05 | 0.006649362 |
| 426.679995 | 654.547679  | 1.47722E-05 | 0.006303015 |
| 426.719995 | 547.522045  | 1.23568E-05 | 0.005272898 |
| 426.759995 | 404.109948  | 9.1202E-06  | 0.003892136 |
| 426.799995 | 316.271533  | 7.13781E-06 | 0.003046416 |
| 426.839995 | 325.782438  | 7.35246E-06 | 0.003138322 |
| 426.879995 | 414.77867   | 9.36098E-06 | 0.003996014 |
| 426.919995 | 596.967458  | 1.34727E-05 | 0.005751775 |
| 426.959995 | 1067.984554 | 2.41029E-05 | 0.010290984 |
| 426.999995 | 1930.18909  | 4.35617E-05 | 0.018600837 |
| 427.039995 | 3213.015148 | 7.25133E-05 | 0.030966069 |
| 427.079995 | 4609.070279 | 0.00010402  | 0.044424988 |
| 427.119995 | 5801.633999 | 0.000130935 | 0.05592487  |
| 427.159995 | 6385.395763 | 0.000144109 | 0.061557808 |
| 427.199995 | 6137.942664 | 0.000138525 | 0.059177801 |
| 427.239995 | 5272.648769 | 0.000118996 | 0.050839995 |
| 427.279995 | 4076.840117 | 9.20086E-05 | 0.039313435 |
| 427.319995 | 2848.102166 | 6.42777E-05 | 0.027467146 |
| 427.359995 | 1829.331006 | 4.12855E-05 | 0.017643751 |
| 427.399995 | 1095.62384  | 2.47267E-05 | 0.010568193 |
| 427.439995 | 631.175825  | 1.42448E-05 | 0.00608878  |
| 427.479995 | 394.246193  | 8.89759E-06 | 0.003803541 |
| 427.519995 | 347.416276  | 7.8407E-06  | 0.003352057 |
| 427.559995 | 403.209939  | 9.09989E-06 | 0.003890748 |
| 427.599995 | 482.516003  | 1.08897E-05 | 0.004656442 |
| 427.639995 | 508.57687   | 1.14779E-05 | 0.004908397 |
| 427.679995 | 496.87874   | 1.12139E-05 | 0.004795944 |
| 427.719995 | 456.537489  | 1.03034E-05 | 0.004406977 |
| 427.759995 | 378.47433   | 8.54164E-06 | 0.003653771 |
| 427.799995 | 312.611331  | 7.0552E-06  | 0.003018216 |
| 427.839995 | 279.73998   | 6.31334E-06 | 0.0027011   |



|            |             |             |             |
|------------|-------------|-------------|-------------|
| 427.879995 | 306.601235  | 6.91956E-06 | 0.002960743 |
| 427.919995 | 413.891859  | 9.34096E-06 | 0.003997185 |
| 427.959995 | 667.255019  | 1.5059E-05  | 0.006444657 |
| 427.999995 | 1131.010569 | 2.55253E-05 | 0.010924842 |
| 428.039995 | 1854.767993 | 4.18595E-05 | 0.017917553 |
| 428.079995 | 2775.738379 | 6.26445E-05 | 0.026816878 |
| 428.119995 | 3745.862279 | 8.45389E-05 | 0.036192791 |
| 428.159995 | 4396.568458 | 9.92244E-05 | 0.04248393  |
| 428.199995 | 4552.025586 | 0.000102733 | 0.043990217 |
| 428.239995 | 4255.458424 | 9.60398E-05 | 0.04112807  |
| 428.279995 | 3572.742877 | 8.06318E-05 | 0.034533    |
| 428.319995 | 2677.371235 | 6.04245E-05 | 0.025881038 |
| 428.359995 | 1727.668822 | 3.89911E-05 | 0.016702218 |
| 428.399995 | 955.300404  | 2.15598E-05 | 0.009236218 |
| 428.439995 | 498.453878  | 1.12494E-05 | 0.004819697 |
| 428.479995 | 319.366477  | 7.20766E-06 | 0.003088337 |
| 428.519995 | 312.629917  | 7.05562E-06 | 0.003023475 |
| 428.559995 | 376.28905   | 8.49232E-06 | 0.003639469 |
| 428.599995 | 464.794829  | 1.04898E-05 | 0.004495916 |
| 428.639995 | 556.346017  | 1.2556E-05  | 0.005381984 |
| 428.679995 | 566.184877  | 1.2778E-05  | 0.005477675 |
| 428.719995 | 551.274022  | 1.24415E-05 | 0.005333914 |
| 428.759995 | 541.531964  | 1.22216E-05 | 0.005240143 |
| 428.799995 | 474.4712    | 1.07082E-05 | 0.004591656 |
| 428.839995 | 424.470048  | 9.5797E-06  | 0.004108158 |
| 428.879995 | 426.981121  | 9.63637E-06 | 0.004132846 |
| 428.919995 | 569.321737  | 1.28488E-05 | 0.005511107 |
| 428.959995 | 1003.225271 | 2.26414E-05 | 0.009712254 |
| 428.999995 | 1846.403007 | 4.16707E-05 | 0.017876749 |
| 429.039995 | 3107.344093 | 7.01284E-05 | 0.0300879   |
| 429.079995 | 4639.49087  | 0.000104707 | 0.044927613 |
| 429.119995 | 5984.445472 | 0.000135061 | 0.057957203 |
| 429.159995 | 6610.063735 | 0.00014918  | 0.064022059 |
| 429.199995 | 6474.026448 | 0.00014611  | 0.062710308 |
| 429.239995 | 5796.524813 | 0.000130819 | 0.056152958 |
| 429.279995 | 4646.297611 | 0.00010486  | 0.0450145   |
| 429.319995 | 3276.077132 | 7.39365E-05 | 0.031742417 |
| 429.359995 | 2073.223535 | 4.67898E-05 | 0.020089654 |
| 429.399995 | 1201.395552 | 2.71138E-05 | 0.011642676 |
| 429.439995 | 651.37139   | 1.47005E-05 | 0.006313002 |
| 429.479995 | 377.666538  | 8.52341E-06 | 0.003660633 |
| 429.519995 | 315.326856  | 7.11649E-06 | 0.003056674 |
| 429.559995 | 400.094827  | 9.02958E-06 | 0.003878748 |
| 429.599995 | 483.51413   | 1.09122E-05 | 0.004687898 |
| 429.639995 | 534.604607  | 1.20653E-05 | 0.005183727 |
| 429.679995 | 537.196823  | 1.21238E-05 | 0.005209347 |

|            |             |             |             |
|------------|-------------|-------------|-------------|
| 429.719995 | 470.50644   | 1.06187E-05 | 0.004563057 |
| 429.759995 | 369.224988  | 8.33289E-06 | 0.003581144 |
| 429.799995 | 291.473415  | 6.57815E-06 | 0.002827288 |
| 429.839995 | 276.802962  | 6.24706E-06 | 0.002685235 |
| 429.879995 | 324.234585  | 7.31752E-06 | 0.003145657 |
| 429.919995 | 436.796143  | 9.85788E-06 | 0.0042381   |
| 429.959995 | 706.282898  | 1.59398E-05 | 0.006853485 |
| 429.999995 | 1257.883693 | 2.83887E-05 | 0.012207133 |
| 430.039995 | 2094.419401 | 4.72681E-05 | 0.020327186 |
| 430.079995 | 3087.943966 | 6.96906E-05 | 0.02997253  |
| 430.119995 | 3990.796716 | 9.00667E-05 | 0.038739499 |
| 430.159995 | 4484.197184 | 0.000101202 | 0.043533088 |
| 430.199995 | 4481.668208 | 0.000101145 | 0.043512582 |
| 430.239995 | 4082.22254  | 9.21301E-05 | 0.039638044 |
| 430.279995 | 3308.887073 | 7.4677E-05  | 0.032132007 |
| 430.319995 | 2421.611329 | 5.46524E-05 | 0.023518018 |
| 430.359995 | 1594.652988 | 3.59891E-05 | 0.015488268 |
| 430.399995 | 924.086386  | 2.08553E-05 | 0.008976139 |
| 430.439995 | 536.206976  | 1.21014E-05 | 0.005208946 |
| 430.479995 | 373.105136  | 8.42046E-06 | 0.003624841 |
| 430.519995 | 345.445336  | 7.79622E-06 | 0.003356429 |
| 430.559995 | 404.333051  | 9.12523E-06 | 0.003928961 |
| 430.599995 | 469.130307  | 1.05876E-05 | 0.004559028 |
| 430.639995 | 483.695993  | 1.09163E-05 | 0.004701015 |
| 430.679995 | 487.571942  | 1.10038E-05 | 0.004739125 |
| 430.719995 | 467.771266  | 1.05569E-05 | 0.004547088 |
| 430.759995 | 406.104073  | 9.1652E-06  | 0.003948003 |
| 430.799995 | 330.537026  | 7.45976E-06 | 0.003213665 |
| 430.839995 | 318.85151   | 7.19603E-06 | 0.003100339 |
| 430.879995 | 399.10837   | 9.00732E-06 | 0.003881074 |
| 430.919995 | 614.758359  | 1.38742E-05 | 0.005978687 |
| 430.959995 | 1063.16111  | 2.39941E-05 | 0.010340482 |
| 430.999995 | 1880.326959 | 4.24364E-05 | 0.018290071 |
| 431.039995 | 3222.519138 | 7.27278E-05 | 0.031348577 |
| 431.079995 | 4714.749513 | 0.000106405 | 0.045869209 |
| 431.119995 | 5906.61094  | 0.000133304 | 0.057470012 |
| 431.159995 | 6567.466666 | 0.000148219 | 0.06390592  |
| 431.199995 | 6496.475222 | 0.000146616 | 0.06322099  |
| 431.239995 | 5575.717034 | 0.000125836 | 0.054265588 |
| 431.279995 | 4211.68341  | 9.50518E-05 | 0.040993952 |
| 431.319995 | 2841.838949 | 6.41363E-05 | 0.027663289 |
| 431.359995 | 1729.003926 | 3.90212E-05 | 0.016832189 |
| 431.399995 | 968.414373  | 2.18558E-05 | 0.009428576 |
| 431.439995 | 552.028769  | 1.24585E-05 | 0.005375104 |
| 431.479995 | 368.400922  | 8.3143E-06  | 0.003587452 |
| 431.519995 | 339.301479  | 7.65756E-06 | 0.003304391 |

|            |             |             |             |
|------------|-------------|-------------|-------------|
| 431.559995 | 374.091662  | 8.44273E-06 | 0.003643544 |
| 431.599995 | 423.9948    | 9.56897E-06 | 0.004129968 |
| 431.639995 | 466.021102  | 1.05174E-05 | 0.004539751 |
| 431.679995 | 472.557194  | 1.0665E-05  | 0.004603849 |
| 431.719995 | 420.364498  | 9.48704E-06 | 0.004095745 |
| 431.759995 | 344.649778  | 7.77827E-06 | 0.003358344 |
| 431.799995 | 299.892738  | 6.76816E-06 | 0.002922492 |
| 431.839995 | 292.126556  | 6.59289E-06 | 0.002847073 |
| 431.879995 | 301.313941  | 6.80024E-06 | 0.002936886 |
| 431.919995 | 380.429338  | 8.58576E-06 | 0.003708362 |
| 431.959995 | 629.272777  | 1.42018E-05 | 0.006134614 |
| 431.999995 | 1123.851662 | 2.53638E-05 | 0.010957147 |
| 432.039995 | 1933.168803 | 4.36289E-05 | 0.018849441 |
| 432.079995 | 2900.218937 | 6.54539E-05 | 0.028281322 |
| 432.119995 | 3665.810279 | 8.27322E-05 | 0.035750252 |
| 432.159995 | 4143.067383 | 9.35033E-05 | 0.040408368 |
| 432.199995 | 4144.166922 | 9.35281E-05 | 0.040422834 |
| 432.239995 | 3699.215354 | 8.34861E-05 | 0.036086048 |
| 432.279995 | 3009.510655 | 6.79205E-05 | 0.029360658 |
| 432.319995 | 2234.976192 | 5.04403E-05 | 0.02180635  |
| 432.359995 | 1516.014307 | 3.42143E-05 | 0.014792908 |
| 432.399995 | 957.39151   | 2.1607E-05  | 0.009342864 |
| 432.439995 | 635.325295  | 1.43384E-05 | 0.006200501 |
| 432.479995 | 489.625818  | 1.10502E-05 | 0.004778979 |
| 432.519995 | 532.366961  | 1.20148E-05 | 0.005196633 |
| 432.559995 | 681.53987   | 1.53814E-05 | 0.006653381 |
| 432.599995 | 847.736411  | 1.91322E-05 | 0.008276603 |
| 432.639995 | 956.998326  | 2.15981E-05 | 0.00934421  |
| 432.679995 | 1046.986437 | 2.3629E-05  | 0.010223807 |
| 432.719995 | 1194.497722 | 2.69581E-05 | 0.01166533  |
| 432.759995 | 1438.376935 | 3.24622E-05 | 0.014048326 |
| 432.799995 | 1830.905452 | 4.1321E-05  | 0.017883722 |
| 432.839995 | 2535.123618 | 5.72142E-05 | 0.024764598 |
| 432.879995 | 3740.766135 | 8.44239E-05 | 0.036545409 |
| 432.919995 | 5791.769915 | 0.000130712 | 0.056587916 |
| 432.959995 | 9370.165467 | 0.000211472 | 0.091558736 |
| 432.999995 | 15508.29584 | 0.000350001 | 0.151550274 |
| 433.039995 | 24238.27467 | 0.000547024 | 0.236883313 |
| 433.079995 | 33063.15976 | 0.000746189 | 0.323159729 |
| 433.119995 | 38008.63501 | 0.000857802 | 0.371531177 |
| 433.159995 | 36405.45578 | 0.00082162  | 0.355893101 |
| 433.199995 | 29649.56406 | 0.000669149 | 0.2898755   |
| 433.239995 | 20726.95204 | 0.000467778 | 0.202660328 |
| 433.279995 | 12646.79159 | 0.00028542  | 0.12366698  |
| 433.319995 | 6925.832657 | 0.000156306 | 0.067730687 |
| 433.359995 | 3479.045746 | 7.85172E-05 | 0.034026221 |

|            |             |             |             |
|------------|-------------|-------------|-------------|
| 433.399995 | 1624.989001 | 3.66737E-05 | 0.015894398 |
| 433.439995 | 778.88321   | 1.75783E-05 | 0.007619142 |
| 433.479995 | 453.743042  | 1.02403E-05 | 0.004438986 |
| 433.519995 | 393.566811  | 8.88225E-06 | 0.003850635 |
| 433.559995 | 423.96756   | 9.56836E-06 | 0.004148457 |
| 433.599995 | 503.991128  | 1.13744E-05 | 0.00493193  |
| 433.639995 | 578.408128  | 1.30539E-05 | 0.005660678 |
| 433.679995 | 613.636465  | 1.38489E-05 | 0.006006    |
| 433.719995 | 595.721045  | 1.34446E-05 | 0.005831189 |
| 433.759995 | 588.540454  | 1.32825E-05 | 0.005761434 |
| 433.799995 | 614.881225  | 1.3877E-05  | 0.006019848 |
| 433.839995 | 748.874211  | 1.6901E-05  | 0.007332351 |
| 433.879995 | 1037.222933 | 2.34087E-05 | 0.010156557 |
| 433.919995 | 1530.103561 | 3.45323E-05 | 0.014984258 |
| 433.959995 | 2485.14724  | 5.60863E-05 | 0.024339216 |
| 433.999995 | 4195.587728 | 9.46886E-05 | 0.041094839 |
| 434.039995 | 6819.096442 | 0.000153898 | 0.066797674 |
| 434.079995 | 9756.424488 | 0.000220189 | 0.095579601 |
| 434.119995 | 11685.82539 | 0.000263733 | 0.114491683 |
| 434.159995 | 11616.18412 | 0.000262161 | 0.11381986  |
| 434.199995 | 9829.92517  | 0.000221848 | 0.096326279 |
| 434.239995 | 7409.328757 | 0.000167218 | 0.072612843 |
| 434.279995 | 5051.821269 | 0.000114013 | 0.049513378 |
| 434.319995 | 3136.936856 | 7.07963E-05 | 0.030748247 |
| 434.359995 | 1823.967278 | 4.11644E-05 | 0.017880169 |
| 434.399995 | 1006.259851 | 2.27099E-05 | 0.009865173 |
| 434.439995 | 553.382413  | 1.24891E-05 | 0.005425752 |
| 434.479995 | 375.336806  | 8.47083E-06 | 0.003680406 |
| 434.519995 | 407.028725  | 9.18607E-06 | 0.003991532 |
| 434.559995 | 561.963839  | 1.26827E-05 | 0.005511412 |
| 434.599995 | 724.427368  | 1.63493E-05 | 0.007105413 |
| 434.639995 | 793.860627  | 1.79163E-05 | 0.007787153 |
| 434.679995 | 718.358073  | 1.62123E-05 | 0.00704718  |
| 434.719995 | 576.901849  | 1.30199E-05 | 0.005659998 |
| 434.759995 | 473.556231  | 1.06875E-05 | 0.004646499 |
| 434.799995 | 427.165782  | 9.64054E-06 | 0.004191705 |
| 434.839995 | 517.555976  | 1.16805E-05 | 0.005079156 |
| 434.879995 | 726.583654  | 1.6398E-05  | 0.007131154 |
| 434.919995 | 1134.020473 | 2.55933E-05 | 0.011131022 |
| 434.959995 | 2063.74083  | 4.65758E-05 | 0.020258591 |
| 434.999995 | 3751.425858 | 8.46645E-05 | 0.036829038 |
| 435.039995 | 6271.832791 | 0.000141547 | 0.061578402 |
| 435.079995 | 9044.520382 | 0.000204122 | 0.088809498 |
| 435.119995 | 11239.60392 | 0.000253662 | 0.110373497 |
| 435.159995 | 12183.35726 | 0.000274961 | 0.119652203 |
| 435.199995 | 11684.40268 | 0.000263701 | 0.11476254  |

|            |             |             |             |
|------------|-------------|-------------|-------------|
| 435.239995 | 10003.07701 | 0.000225756 | 0.098257829 |
| 435.279995 | 7619.927408 | 0.000171971 | 0.0748556   |
| 435.319995 | 5194.175675 | 0.000117225 | 0.051030521 |
| 435.359995 | 3208.638687 | 7.24145E-05 | 0.031526379 |
| 435.399995 | 1806.607654 | 4.07726E-05 | 0.017752398 |
| 435.439995 | 940.18941   | 2.12188E-05 | 0.009239499 |
| 435.479995 | 532.975667  | 1.20285E-05 | 0.005238179 |
| 435.519995 | 431.702513  | 9.74292E-06 | 0.004243238 |
| 435.559995 | 469.805198  | 1.06028E-05 | 0.004618177 |
| 435.599995 | 521.602484  | 1.17718E-05 | 0.005127814 |
| 435.639995 | 540.289165  | 1.21936E-05 | 0.005312008 |
| 435.679995 | 524.368235  | 1.18343E-05 | 0.005155951 |
| 435.719995 | 470.42719   | 1.06169E-05 | 0.00462599  |
| 435.759995 | 388.109836  | 8.7591E-06  | 0.003816865 |
| 435.799995 | 316.490424  | 7.14275E-06 | 0.00311281  |
| 435.839995 | 293.730921  | 6.6291E-06  | 0.002889226 |
| 435.879995 | 336.097722  | 7.58526E-06 | 0.003306262 |
| 435.919995 | 457.788762  | 1.03317E-05 | 0.004503775 |
| 435.959995 | 748.251351  | 1.6887E-05  | 0.007362052 |
| 435.999995 | 1333.554469 | 3.00965E-05 | 0.013122059 |
| 436.039995 | 2315.69193  | 5.22619E-05 | 0.022788297 |
| 436.079995 | 3530.712831 | 7.96833E-05 | 0.03474828  |
| 436.119995 | 4617.766211 | 0.000104217 | 0.045450922 |
| 436.159995 | 5343.979458 | 0.000120606 | 0.052603588 |
| 436.199995 | 5462.786778 | 0.000123287 | 0.053778002 |
| 436.239995 | 4960.864762 | 0.00011196  | 0.048841346 |
| 436.279995 | 4034.907547 | 9.10622E-05 | 0.039728635 |
| 436.319995 | 2931.249229 | 6.61542E-05 | 0.028864406 |
| 436.359995 | 1915.409457 | 4.32281E-05 | 0.018863024 |
| 436.399995 | 1157.936158 | 2.6133E-05  | 0.011404444 |
| 436.439995 | 685.660242  | 1.54744E-05 | 0.006753646 |
| 436.479995 | 447.201815  | 1.00927E-05 | 0.004405271 |
| 436.519995 | 372.968101  | 8.41737E-06 | 0.003674351 |
| 436.559995 | 397.324327  | 8.96706E-06 | 0.003914658 |
| 436.599995 | 479.282437  | 1.08167E-05 | 0.004722587 |
| 436.639995 | 539.075908  | 1.21662E-05 | 0.005312246 |
| 436.679995 | 527.956845  | 1.19153E-05 | 0.005203152 |
| 436.719995 | 466.821865  | 1.05355E-05 | 0.004601072 |
| 436.759995 | 424.004187  | 9.56918E-06 | 0.004179437 |
| 436.799995 | 396.865292  | 8.9567E-06  | 0.003912285 |
| 436.839995 | 386.864285  | 8.73099E-06 | 0.003814045 |
| 436.879995 | 404.11589   | 9.12033E-06 | 0.003984491 |
| 436.919995 | 530.769046  | 1.19787E-05 | 0.005233741 |
| 436.959995 | 893.729439  | 2.01702E-05 | 0.008813583 |
| 436.999995 | 1664.778148 | 3.75717E-05 | 0.016418843 |
| 437.039995 | 2901.036478 | 6.54724E-05 | 0.028614037 |

|            |             |             |             |
|------------|-------------|-------------|-------------|
| 437.079995 | 4385.500418 | 9.89746E-05 | 0.043259833 |
| 437.119995 | 5789.817879 | 0.000130668 | 0.057111765 |
| 437.159995 | 6628.515468 | 0.000149596 | 0.065397545 |
| 437.199995 | 6657.244193 | 0.000150245 | 0.065686995 |
| 437.239995 | 6110.82391  | 0.000137913 | 0.060300985 |
| 437.279995 | 5128.532714 | 0.000115744 | 0.050612466 |
| 437.319995 | 3867.056486 | 8.72741E-05 | 0.0381667   |
| 437.359995 | 2653.165824 | 5.98783E-05 | 0.026188354 |
| 437.399995 | 1687.583359 | 3.80864E-05 | 0.016658994 |
| 437.439995 | 1024.231948 | 2.31155E-05 | 0.010111639 |
| 437.479995 | 644.909578  | 1.45547E-05 | 0.006367395 |
| 437.519995 | 475.752426  | 1.07371E-05 | 0.004697683 |
| 437.559995 | 464.248332  | 1.04774E-05 | 0.004584508 |
| 437.599995 | 531.006779  | 1.19841E-05 | 0.005244235 |
| 437.639995 | 619.792872  | 1.39879E-05 | 0.006121648 |
| 437.679995 | 643.72225   | 1.45279E-05 | 0.006358578 |
| 437.719995 | 592.247236  | 1.33662E-05 | 0.005850651 |
| 437.759995 | 522.662225  | 1.17958E-05 | 0.005163711 |
| 437.799995 | 535.297889  | 1.20809E-05 | 0.00528903  |
| 437.839995 | 595.337603  | 1.34359E-05 | 0.005882792 |
| 437.879995 | 643.290749  | 1.45182E-05 | 0.006357219 |
| 437.919995 | 687.691188  | 1.55202E-05 | 0.00679662  |
| 437.959995 | 824.307785  | 1.86035E-05 | 0.008147579 |
| 437.999995 | 1191.119771 | 2.68819E-05 | 0.011774278 |
| 438.039995 | 1831.22857  | 4.13283E-05 | 0.018103439 |
| 438.079995 | 2735.690755 | 6.17407E-05 | 0.027047379 |
| 438.119995 | 3578.072272 | 8.07521E-05 | 0.035379113 |
| 438.159995 | 4136.753267 | 9.33608E-05 | 0.04090695  |
| 438.199995 | 4217.546167 | 9.51841E-05 | 0.041709691 |
| 438.239995 | 3880.166068 | 8.75699E-05 | 0.038376652 |
| 438.279995 | 3240.332259 | 7.31298E-05 | 0.032051322 |
| 438.319995 | 2387.855503 | 5.38906E-05 | 0.023621316 |
| 438.359995 | 1574.05583  | 3.55242E-05 | 0.015572409 |
| 438.399995 | 947.158439  | 2.1376E-05  | 0.009371259 |
| 438.439995 | 571.435005  | 1.28965E-05 | 0.005654338 |
| 438.479995 | 412.314308  | 9.30536E-06 | 0.004080214 |
| 438.519995 | 373.828473  | 8.43679E-06 | 0.0036997   |
| 438.559995 | 406.889498  | 9.18293E-06 | 0.004027265 |
| 438.599995 | 479.535063  | 1.08224E-05 | 0.004746721 |
| 438.639995 | 514.023238  | 1.16008E-05 | 0.00508857  |
| 438.679995 | 486.919345  | 1.09891E-05 | 0.004820695 |
| 438.719995 | 458.908242  | 1.03569E-05 | 0.004543788 |
| 438.759995 | 409.663582  | 9.24554E-06 | 0.004056572 |
| 438.799995 | 381.112411  | 8.60118E-06 | 0.003774196 |
| 438.839995 | 386.014512  | 8.71181E-06 | 0.003823091 |
| 438.879995 | 440.025893  | 9.93077E-06 | 0.004358417 |

|            |             |             |             |
|------------|-------------|-------------|-------------|
| 438.919995 | 600.385567  | 1.35499E-05 | 0.005947307 |
| 438.959995 | 983.686168  | 2.22004E-05 | 0.009745099 |
| 438.999995 | 1830.995328 | 4.1323E-05  | 0.018140803 |
| 439.039995 | 3124.469721 | 7.05149E-05 | 0.030958874 |
| 439.079995 | 4653.797337 | 0.00010503  | 0.046116451 |
| 439.119995 | 6145.490591 | 0.000138695 | 0.060903819 |
| 439.159995 | 7044.501454 | 0.000158985 | 0.06981967  |
| 439.199995 | 7182.38965  | 0.000162097 | 0.071192795 |
| 439.239995 | 6562.974078 | 0.000148117 | 0.065058991 |
| 439.279995 | 5432.581915 | 0.000122606 | 0.053858278 |
| 439.319995 | 4124.864222 | 9.30924E-05 | 0.04089737  |
| 439.359995 | 2824.353149 | 6.37417E-05 | 0.02800556  |
| 439.399995 | 1731.143666 | 3.90695E-05 | 0.017167139 |
| 439.439995 | 971.711574  | 2.19302E-05 | 0.009636997 |
| 439.479995 | 562.023177  | 1.26841E-05 | 0.0055744   |
| 439.519995 | 425.506527  | 9.60309E-06 | 0.00422075  |
| 439.559995 | 425.808843  | 9.60991E-06 | 0.004224133 |
| 439.599995 | 472.597145  | 1.06659E-05 | 0.004688712 |
| 439.639995 | 521.06889   | 1.17598E-05 | 0.005170078 |
| 439.679995 | 513.604104  | 1.15913E-05 | 0.005096476 |
| 439.719995 | 476.410464  | 1.07519E-05 | 0.004727834 |
| 439.759995 | 417.492733  | 9.42223E-06 | 0.00414352  |
| 439.799995 | 365.741654  | 8.25428E-06 | 0.003630232 |
| 439.839995 | 360.141204  | 8.12789E-06 | 0.003574969 |
| 439.879995 | 393.612029  | 8.88328E-06 | 0.003907575 |
| 439.919995 | 484.475181  | 1.09339E-05 | 0.004810054 |
| 439.959995 | 652.509624  | 1.47262E-05 | 0.006478954 |
| 439.999995 | 989.22553   | 2.23254E-05 | 0.009823195 |
| 440.039995 | 1698.698252 | 3.83373E-05 | 0.016869925 |
| 440.079995 | 2604.418743 | 5.87781E-05 | 0.025867067 |
| 440.119995 | 3405.72605  | 7.68625E-05 | 0.03382872  |
| 440.159995 | 3951.224317 | 8.91736E-05 | 0.039250664 |
| 440.199995 | 4127.853777 | 9.31599E-05 | 0.041008992 |
| 440.239995 | 3765.056594 | 8.49721E-05 | 0.037408109 |
| 440.279995 | 3103.498865 | 7.00416E-05 | 0.030837936 |
| 440.319995 | 2309.442175 | 5.21209E-05 | 0.022949871 |
| 440.359995 | 1553.55646  | 3.50616E-05 | 0.015439728 |
| 440.399995 | 944.404966  | 2.13139E-05 | 0.009386643 |
| 440.439995 | 546.449279  | 1.23326E-05 | 0.00543177  |
| 440.479995 | 369.455779  | 8.3381E-06  | 0.003672767 |
| 440.519995 | 349.242046  | 7.88191E-06 | 0.003472137 |
| 440.559995 | 407.970495  | 9.20733E-06 | 0.004056379 |
| 440.599995 | 476.520908  | 1.07544E-05 | 0.004738394 |
| 440.639995 | 531.409775  | 1.19932E-05 | 0.005284674 |
| 440.679995 | 535.744701  | 1.2091E-05  | 0.005328267 |
| 440.719995 | 473.473608  | 1.06856E-05 | 0.004709375 |

|            |             |             |             |
|------------|-------------|-------------|-------------|
| 440.759995 | 427.416212  | 9.64619E-06 | 0.004251654 |
| 440.799995 | 389.157256  | 8.78274E-06 | 0.003871431 |
| 440.839995 | 355.829001  | 8.03056E-06 | 0.003540194 |
| 440.879995 | 390.119821  | 8.80446E-06 | 0.003881711 |
| 440.919995 | 594.886281  | 1.34258E-05 | 0.005919684 |
| 440.959995 | 1072.446033 | 2.42036E-05 | 0.010672825 |
| 440.999995 | 1908.215249 | 4.30658E-05 | 0.018992    |
| 441.039995 | 3148.538493 | 7.10581E-05 | 0.031339477 |
| 441.079995 | 4520.137764 | 0.000102013 | 0.044995988 |
| 441.119995 | 5663.51378  | 0.000127818 | 0.056382907 |
| 441.159995 | 6295.572242 | 0.000142082 | 0.062681025 |
| 441.199995 | 6197.274177 | 0.000139864 | 0.061707928 |
| 441.239995 | 5465.773483 | 0.000123355 | 0.054429113 |
| 441.279995 | 4300.990286 | 9.70674E-05 | 0.042833884 |
| 441.319995 | 3062.447854 | 6.91152E-05 | 0.030501912 |
| 441.359995 | 2024.69395  | 4.56945E-05 | 0.020167734 |
| 441.399995 | 1246.041559 | 2.81214E-05 | 0.012412796 |
| 441.439995 | 721.990856  | 1.62943E-05 | 0.007192968 |
| 441.479995 | 455.107497  | 1.02711E-05 | 0.004534504 |
| 441.519995 | 423.309312  | 9.5535E-06  | 0.004218062 |
| 441.559995 | 476.059157  | 1.0744E-05  | 0.004744117 |
| 441.599995 | 510.260979  | 1.15159E-05 | 0.005085412 |
| 441.639995 | 498.208427  | 1.12439E-05 | 0.004965743 |
| 441.679995 | 444.25886   | 1.00263E-05 | 0.004428418 |
| 441.719995 | 384.623548  | 8.68042E-06 | 0.003834314 |
| 441.759995 | 317.260994  | 7.16014E-06 | 0.003163063 |
| 441.799995 | 265.868549  | 6.00028E-06 | 0.002650925 |
| 441.839995 | 251.794127  | 5.68264E-06 | 0.002510819 |
| 441.879995 | 277.766787  | 6.26881E-06 | 0.002770062 |
| 441.919995 | 388.683688  | 8.77205E-06 | 0.003876544 |
| 441.959995 | 631.662524  | 1.42557E-05 | 0.006300468 |
| 441.999995 | 1087.342689 | 2.45398E-05 | 0.010846596 |
| 442.039995 | 1836.234533 | 4.14413E-05 | 0.018318692 |
| 442.079995 | 2764.368079 | 6.23879E-05 | 0.027580459 |
| 442.119995 | 3676.690892 | 8.29778E-05 | 0.036686141 |
| 442.159995 | 4339.552213 | 9.79376E-05 | 0.04330411  |
| 442.199995 | 4485.857462 | 0.00010124  | 0.044768131 |
| 442.239995 | 4177.287263 | 9.42756E-05 | 0.041692421 |
| 442.279995 | 3531.062424 | 7.96912E-05 | 0.035245806 |
| 442.319995 | 2653.932851 | 5.98956E-05 | 0.026493007 |
| 442.359995 | 1760.059646 | 3.97221E-05 | 0.017571466 |
| 442.399995 | 1065.63675  | 2.40499E-05 | 0.010639692 |
| 442.439995 | 627.985684  | 1.41728E-05 | 0.006270597 |
| 442.479995 | 389.254906  | 8.78494E-06 | 0.003887161 |
| 442.519995 | 333.230727  | 7.52055E-06 | 0.003327995 |
| 442.559995 | 397.365537  | 8.96799E-06 | 0.003968872 |



|            |             |             |             |
|------------|-------------|-------------|-------------|
| 442.599995 | 473.075724  | 1.06767E-05 | 0.00472549  |
| 442.639995 | 514.351282  | 1.16082E-05 | 0.00513825  |
| 442.679995 | 509.180252  | 1.14915E-05 | 0.005087052 |
| 442.719995 | 472.27087   | 1.06585E-05 | 0.004718729 |
| 442.759995 | 414.967498  | 9.36524E-06 | 0.004146553 |
| 442.799995 | 391.300768  | 8.83111E-06 | 0.003910417 |
| 442.839995 | 430.025197  | 9.70507E-06 | 0.004297793 |
| 442.879995 | 478.644176  | 1.08023E-05 | 0.004784137 |
| 442.919995 | 617.866615  | 1.39444E-05 | 0.006176249 |
| 442.959995 | 981.383233  | 2.21485E-05 | 0.009810878 |
| 442.999995 | 1713.990453 | 3.86824E-05 | 0.017136293 |
| 443.039995 | 2863.675429 | 6.46292E-05 | 0.028633305 |
| 443.079995 | 4133.570247 | 9.32889E-05 | 0.041334455 |
| 443.119995 | 5154.825256 | 0.000116337 | 0.051551351 |
| 443.159995 | 5770.153767 | 0.000130224 | 0.057710215 |
| 443.199995 | 5729.72918  | 0.000129312 | 0.057311081 |
| 443.239995 | 5021.10496  | 0.000113319 | 0.050227666 |
| 443.279995 | 3971.032225 | 8.96207E-05 | 0.039727048 |
| 443.319995 | 2803.948023 | 6.32812E-05 | 0.028053822 |
| 443.359995 | 1784.624696 | 4.02765E-05 | 0.017856986 |
| 443.399995 | 1054.647458 | 2.38019E-05 | 0.010553773 |
| 443.439995 | 596.228949  | 1.34561E-05 | 0.005966954 |
| 443.479995 | 380.49315   | 8.5872E-06  | 0.003808252 |
| 443.519995 | 350.836753  | 7.9179E-06  | 0.003511746 |
| 443.559995 | 422.274337  | 9.53014E-06 | 0.00422719  |
| 443.599995 | 519.194049  | 1.17175E-05 | 0.005197877 |
| 443.639995 | 563.003706  | 1.27062E-05 | 0.005636983 |
| 443.679995 | 541.11592   | 1.22122E-05 | 0.005418323 |
| 443.719995 | 473.188748  | 1.06792E-05 | 0.004738579 |
| 443.759995 | 391.561977  | 8.83701E-06 | 0.003921511 |
| 443.799995 | 331.255967  | 7.47599E-06 | 0.003317842 |
| 443.839995 | 302.709227  | 6.83173E-06 | 0.003032193 |
| 443.879995 | 316.345367  | 7.13947E-06 | 0.00316907  |
| 443.919995 | 399.570637  | 9.01775E-06 | 0.004003161 |
| 443.959995 | 599.551451  | 1.3531E-05  | 0.006007241 |
| 443.999995 | 988.746322  | 2.23146E-05 | 0.009907694 |
| 444.039995 | 1652.703608 | 3.72992E-05 | 0.016562345 |
| 444.079995 | 2484.672307 | 5.60756E-05 | 0.024902049 |
| 444.119995 | 3232.321098 | 7.2949E-05  | 0.032398103 |
| 444.159995 | 3727.629565 | 8.41274E-05 | 0.037366029 |
| 444.199995 | 3848.155172 | 8.68475E-05 | 0.03857766  |
| 444.239995 | 3535.236522 | 7.97854E-05 | 0.03544385  |
| 444.279995 | 2861.51427  | 6.45804E-05 | 0.028691776 |
| 444.319995 | 2033.407291 | 4.58912E-05 | 0.020390365 |
| 444.359995 | 1275.096204 | 2.87771E-05 | 0.012787412 |
| 444.399995 | 760.895562  | 1.71724E-05 | 0.007631394 |

|            |             |             |             |
|------------|-------------|-------------|-------------|
| 444.439995 | 466.883425  | 1.05369E-05 | 0.004683024 |
| 444.479995 | 350.951634  | 7.92049E-06 | 0.003520499 |
| 444.519995 | 358.613368  | 8.0934E-06  | 0.00359768  |
| 444.559995 | 397.483078  | 8.97064E-06 | 0.003987987 |
| 444.599995 | 449.824474  | 1.01519E-05 | 0.00451354  |
| 444.639995 | 506.67067   | 1.14349E-05 | 0.005084392 |
| 444.679995 | 482.597521  | 1.08916E-05 | 0.004843256 |
| 444.719995 | 385.140058  | 8.69207E-06 | 0.003865539 |
| 444.759995 | 308.846379  | 6.97023E-06 | 0.003100081 |
| 444.799995 | 284.179408  | 6.41353E-06 | 0.00285274  |
| 444.839995 | 297.721728  | 6.71916E-06 | 0.002988953 |
| 444.879995 | 385.494379  | 8.70007E-06 | 0.003870488 |
| 444.919995 | 637.573523  | 1.43891E-05 | 0.006402019 |
| 444.959995 | 1212.602959 | 2.73668E-05 | 0.012177113 |
| 444.999995 | 2198.626663 | 4.96199E-05 | 0.022080874 |
| 445.039995 | 3681.085046 | 8.3077E-05  | 0.036972571 |
| 445.079995 | 5406.878359 | 0.000122026 | 0.054311204 |
| 445.119995 | 6771.887614 | 0.000152832 | 0.068028611 |
| 445.159995 | 7364.705006 | 0.000166211 | 0.073990547 |
| 445.199995 | 7269.731781 | 0.000164068 | 0.073042948 |
| 445.239995 | 6451.893548 | 0.00014561  | 0.064831507 |
| 445.279995 | 5042.440331 | 0.000113801 | 0.050673244 |
| 445.319995 | 3449.506452 | 7.78506E-05 | 0.034668409 |
| 445.359995 | 2065.283419 | 4.66106E-05 | 0.020758483 |
| 445.399995 | 1130.416008 | 2.55119E-05 | 0.011363007 |
| 445.439995 | 595.961258  | 1.345E-05   | 0.005991175 |
| 445.479995 | 378.274094  | 8.53712E-06 | 0.003803116 |
| 445.519995 | 328.725749  | 7.41888E-06 | 0.00330526  |
| 445.559995 | 359.452376  | 8.11234E-06 | 0.003614534 |
| 445.599995 | 478.823444  | 1.08064E-05 | 0.004815322 |
| 445.639995 | 529.837523  | 1.19577E-05 | 0.005328827 |
| 445.679995 | 491.994321  | 1.11036E-05 | 0.004948664 |
| 445.719995 | 413.509399  | 9.33233E-06 | 0.004159607 |
| 445.759995 | 329.638081  | 7.43947E-06 | 0.003316219 |
| 445.799995 | 270.034562  | 6.0943E-06  | 0.002716841 |
| 445.839995 | 257.680792  | 5.8155E-06  | 0.002592781 |
| 445.879995 | 284.076819  | 6.41122E-06 | 0.002858634 |
| 445.919995 | 395.742968  | 8.93137E-06 | 0.003982675 |
| 445.959995 | 665.08011   | 1.50099E-05 | 0.006693829 |
| 445.999995 | 1170.119592 | 2.6408E-05  | 0.011777954 |
| 446.039995 | 1944.981617 | 4.38955E-05 | 0.01957916  |
| 446.079994 | 2851.262887 | 6.4349E-05  | 0.028704816 |
| 446.119994 | 3728.016522 | 8.41361E-05 | 0.037534814 |
| 446.159994 | 4373.978472 | 9.87146E-05 | 0.044042506 |
| 446.199994 | 4536.472598 | 0.000102382 | 0.045682789 |
| 446.239994 | 4108.380516 | 9.27204E-05 | 0.041375562 |

|            |             |             |             |
|------------|-------------|-------------|-------------|
| 446.279994 | 3273.113778 | 7.38696E-05 | 0.032966533 |
| 446.319994 | 2293.951094 | 5.17713E-05 | 0.023106558 |
| 446.359994 | 1429.125923 | 3.22534E-05 | 0.014396619 |
| 446.399994 | 810.857923  | 1.82999E-05 | 0.00816909  |
| 446.439994 | 486.233625  | 1.09736E-05 | 0.004899061 |
| 446.479994 | 360.87367   | 8.14442E-06 | 0.003636319 |
| 446.519994 | 344.015738  | 7.76396E-06 | 0.003466762 |
| 446.559994 | 393.033096  | 8.87021E-06 | 0.003961081 |
| 446.599994 | 499.228502  | 1.12669E-05 | 0.005031794 |
| 446.639994 | 566.28744   | 1.27803E-05 | 0.005708201 |
| 446.679994 | 551.542514  | 1.24475E-05 | 0.00556007  |
| 446.719994 | 509.375051  | 1.14959E-05 | 0.005135442 |
| 446.759994 | 451.627359  | 1.01926E-05 | 0.004553646 |
| 446.799994 | 389.919111  | 8.79993E-06 | 0.003931809 |
| 446.839994 | 437.499249  | 9.87375E-06 | 0.004411986 |
| 446.879994 | 813.580224  | 1.83614E-05 | 0.00820533  |
| 446.919994 | 2028.745547 | 4.5786E-05  | 0.020462661 |
| 446.959994 | 4948.778737 | 0.000111687 | 0.04991964  |
| 446.999994 | 10163.30086 | 0.000229372 | 0.102529079 |
| 447.039994 | 17248.43449 | 0.000389273 | 0.174020663 |
| 447.079994 | 24246.80643 | 0.000547217 | 0.244649616 |
| 447.119994 | 28280.57762 | 0.000638253 | 0.285375787 |
| 447.159994 | 27391.54395 | 0.000618189 | 0.276429387 |
| 447.199994 | 22580.44264 | 0.000509609 | 0.227897204 |
| 447.239994 | 16150.40229 | 0.000364492 | 0.163015438 |
| 447.279994 | 10317.34866 | 0.000232848 | 0.104148336 |
| 447.319994 | 5986.153718 | 0.000135099 | 0.060432552 |
| 447.359994 | 3200.527506 | 7.22314E-05 | 0.03231346  |
| 447.399994 | 1591.635358 | 3.5921E-05  | 0.016071052 |
| 447.439994 | 776.932883  | 1.75343E-05 | 0.007845544 |
| 447.479994 | 418.523298  | 9.44549E-06 | 0.004226667 |
| 447.519994 | 348.273513  | 7.86005E-06 | 0.003517529 |
| 447.559994 | 416.879974  | 9.4084E-06  | 0.004210824 |
| 447.599994 | 471.171776  | 1.06337E-05 | 0.00475964  |
| 447.639994 | 524.822742  | 1.18445E-05 | 0.00530208  |
| 447.679994 | 544.741151  | 1.2294E-05  | 0.0055038   |
| 447.719994 | 524.294847  | 1.18326E-05 | 0.005297694 |
| 447.759994 | 474.483336  | 1.07084E-05 | 0.004794806 |
| 447.799994 | 445.273196  | 1.00492E-05 | 0.00450003  |
| 447.839994 | 399.468685  | 9.01545E-06 | 0.00403748  |
| 447.879994 | 424.113787  | 9.57166E-06 | 0.004286954 |
| 447.919994 | 678.067691  | 1.5303E-05  | 0.006854539 |
| 447.959994 | 1341.048843 | 3.02656E-05 | 0.01355778  |
| 447.999994 | 2728.853351 | 6.15864E-05 | 0.027590715 |
| 448.039994 | 4896.178307 | 0.0001105   | 0.049508386 |
| 448.079994 | 7197.159798 | 0.00016243  | 0.072781576 |

|            |             |             |             |
|------------|-------------|-------------|-------------|
| 448.119994 | 8751.480976 | 0.000197509 | 0.088507614 |
| 448.159994 | 8753.595146 | 0.000197556 | 0.088536897 |
| 448.199994 | 7655.823787 | 0.000172781 | 0.077440568 |
| 448.239994 | 5952.008571 | 0.000134329 | 0.060211425 |
| 448.279994 | 4152.301621 | 9.37117E-05 | 0.042009064 |
| 448.319994 | 2640.873848 | 5.96008E-05 | 0.02672025  |
| 448.359994 | 1567.403312 | 3.53741E-05 | 0.015860336 |
| 448.399994 | 916.742001  | 2.06896E-05 | 0.009277212 |
| 448.439994 | 546.399703  | 1.23315E-05 | 0.005529929 |
| 448.479994 | 394.954109  | 8.91356E-06 | 0.003997555 |
| 448.519994 | 397.259724  | 8.9656E-06  | 0.00402125  |
| 448.559994 | 465.645792  | 1.0509E-05  | 0.004713907 |
| 448.599994 | 534.227397  | 1.20568E-05 | 0.005408666 |
| 448.639994 | 582.865144  | 1.31545E-05 | 0.005901614 |
| 448.679994 | 656.067986  | 1.48065E-05 | 0.006643399 |
| 448.719994 | 739.894711  | 1.66984E-05 | 0.007492903 |
| 448.759994 | 803.893455  | 1.81428E-05 | 0.008141743 |
| 448.799994 | 1006.024026 | 2.27046E-05 | 0.010189807 |
| 448.839994 | 1415.230078 | 3.19398E-05 | 0.014335847 |
| 448.879994 | 2099.715379 | 4.73877E-05 | 0.021271369 |
| 448.919994 | 3592.056584 | 8.10677E-05 | 0.036392918 |
| 448.959994 | 6888.276863 | 0.000155459 | 0.069794788 |
| 448.999994 | 12415.39767 | 0.000280198 | 0.125809005 |
| 449.039994 | 19888.92314 | 0.000448865 | 0.201558468 |
| 449.079994 | 27267.32777 | 0.000615386 | 0.276357365 |
| 449.119994 | 31250.97236 | 0.000705291 | 0.316760252 |
| 449.159994 | 29890.24027 | 0.000674581 | 0.302994838 |
| 449.199994 | 24032.15842 | 0.000542372 | 0.243633653 |
| 449.239994 | 16597.76364 | 0.000374588 | 0.168280094 |
| 449.279994 | 10104.90825 | 0.000228054 | 0.102459967 |
| 449.319994 | 5610.947325 | 0.000126631 | 0.05689796  |
| 449.359994 | 2916.623059 | 6.58241E-05 | 0.029578726 |
| 449.399994 | 1423.552869 | 3.21276E-05 | 0.014438146 |
| 449.439994 | 687.855134  | 1.55239E-05 | 0.006977076 |
| 449.479994 | 396.69793   | 8.95292E-06 | 0.004024158 |
| 449.519994 | 337.746015  | 7.62246E-06 | 0.003426447 |
| 449.559994 | 388.153643  | 8.76009E-06 | 0.003938185 |
| 449.599994 | 491.60347   | 1.10948E-05 | 0.004988225 |
| 449.639994 | 529.877798  | 1.19586E-05 | 0.005377067 |
| 449.679994 | 542.752931  | 1.22492E-05 | 0.00550821  |
| 449.719994 | 503.590296  | 1.13653E-05 | 0.005111217 |
| 449.759994 | 412.736318  | 9.31488E-06 | 0.004189462 |
| 449.799994 | 368.803068  | 8.32337E-06 | 0.003743852 |
| 449.839994 | 435.410026  | 9.8266E-06  | 0.004420397 |
| 449.879994 | 589.358266  | 1.3301E-05  | 0.005983852 |
| 449.919994 | 919.54862   | 2.07529E-05 | 0.009337159 |

|            |             |             |             |
|------------|-------------|-------------|-------------|
| 449.959994 | 1693.009873 | 3.82089E-05 | 0.017192465 |
| 449.999994 | 3214.288801 | 7.2542E-05  | 0.032643909 |
| 450.039994 | 5473.751891 | 0.000123535 | 0.055595671 |
| 450.079994 | 7762.226698 | 0.000175183 | 0.078846204 |
| 450.119994 | 9287.608757 | 0.000209608 | 0.094348929 |
| 450.159994 | 9501.522442 | 0.000214436 | 0.096530566 |
| 450.199994 | 8602.058604 | 0.000194136 | 0.087400243 |
| 450.239994 | 7004.410204 | 0.00015808  | 0.07117384  |
| 450.279994 | 5251.704263 | 0.000118524 | 0.053368828 |
| 450.319994 | 3590.476511 | 8.10321E-05 | 0.036490354 |
| 450.359994 | 2109.599149 | 4.76107E-05 | 0.021441961 |
| 450.399994 | 1075.492595 | 2.42724E-05 | 0.010932275 |
| 450.439994 | 559.221369  | 1.26208E-05 | 0.005684934 |
| 450.479994 | 373.648237  | 8.43272E-06 | 0.003798772 |
| 450.519994 | 346.796817  | 7.82672E-06 | 0.003526094 |
| 450.559994 | 429.203235  | 9.68652E-06 | 0.004364358 |
| 450.599994 | 531.781526  | 1.20016E-05 | 0.005407907 |
| 450.639994 | 545.477128  | 1.23107E-05 | 0.005547675 |
| 450.679994 | 574.771434  | 1.29718E-05 | 0.005846127 |
| 450.719994 | 683.556597  | 1.54269E-05 | 0.006953221 |
| 450.759994 | 798.694602  | 1.80254E-05 | 0.00812514  |
| 450.799994 | 848.508337  | 1.91497E-05 | 0.008632663 |
| 450.839994 | 846.242381  | 1.90985E-05 | 0.008610373 |
| 450.879994 | 841.057712  | 1.89815E-05 | 0.008558379 |
| 450.919994 | 973.102377  | 2.19616E-05 | 0.009902909 |
| 450.959994 | 1447.34911  | 3.26647E-05 | 0.014730452 |
| 450.999994 | 2403.254091 | 5.42381E-05 | 0.024461382 |
| 451.039994 | 3931.438844 | 8.87271E-05 | 0.04001947  |
| 451.079994 | 5830.311238 | 0.000131582 | 0.059354009 |
| 451.119994 | 7381.392458 | 0.000166588 | 0.075151063 |
| 451.159994 | 8024.150281 | 0.000181094 | 0.081702321 |
| 451.199994 | 7809.849791 | 0.000176257 | 0.079527352 |
| 451.239994 | 6799.502816 | 0.000153455 | 0.069245172 |
| 451.279994 | 5336.902085 | 0.000120446 | 0.054355072 |
| 451.319994 | 3795.657635 | 8.56627E-05 | 0.038661292 |
| 451.359994 | 2390.642415 | 5.39535E-05 | 0.024352438 |
| 451.399994 | 1357.882947 | 3.06455E-05 | 0.013833391 |
| 451.439994 | 763.658605  | 1.72347E-05 | 0.007780438 |
| 451.479994 | 460.350732  | 1.03895E-05 | 0.00469064  |
| 451.519994 | 363.019533  | 8.19285E-06 | 0.003699233 |
| 451.559994 | 404.072321  | 9.11935E-06 | 0.004117933 |
| 451.599994 | 477.011754  | 1.07655E-05 | 0.004861696 |
| 451.639994 | 514.68957   | 1.16158E-05 | 0.005246172 |
| 451.679994 | 523.842136  | 1.18224E-05 | 0.005339936 |
| 451.719994 | 499.806851  | 1.12799E-05 | 0.005095376 |
| 451.759994 | 430.974181  | 9.72649E-06 | 0.004394038 |

|            |             |             |             |
|------------|-------------|-------------|-------------|
| 451.799994 | 359.43877   | 8.11203E-06 | 0.003665016 |
| 451.839994 | 308.238424  | 6.95651E-06 | 0.00314323  |
| 451.879994 | 331.579269  | 7.48328E-06 | 0.003381546 |
| 451.919994 | 398.788407  | 9.0001E-06  | 0.004067325 |
| 451.959994 | 570.624419  | 1.28782E-05 | 0.00582043  |
| 451.999994 | 959.58644   | 2.16565E-05 | 0.009788751 |
| 452.039994 | 1609.949059 | 3.63343E-05 | 0.01642456  |
| 452.079994 | 2480.727222 | 5.59866E-05 | 0.025310403 |
| 452.119994 | 3364.85304  | 7.594E-05   | 0.034334013 |
| 452.159994 | 4003.312009 | 9.03492E-05 | 0.040852283 |
| 452.199994 | 4249.882309 | 9.59139E-05 | 0.043372276 |
| 452.239994 | 4004.819505 | 9.03832E-05 | 0.040874897 |
| 452.279994 | 3246.00026  | 7.32577E-05 | 0.033132994 |
| 452.319994 | 2281.212602 | 5.14838E-05 | 0.023287148 |
| 452.359994 | 1445.458597 | 3.2622E-05  | 0.014756882 |
| 452.399994 | 858.147084  | 1.93672E-05 | 0.008761714 |
| 452.439994 | 522.87962   | 1.18007E-05 | 0.005339093 |
| 452.479994 | 352.804798  | 7.96231E-06 | 0.003602787 |
| 452.519994 | 327.784624  | 7.39764E-06 | 0.003347581 |
| 452.559994 | 411.272531  | 9.28185E-06 | 0.004200593 |
| 452.599994 | 502.017352  | 1.13298E-05 | 0.005127882 |
| 452.639994 | 553.090261  | 1.24825E-05 | 0.005650068 |
| 452.679994 | 536.128419  | 1.20997E-05 | 0.005477279 |
| 452.719994 | 495.296176  | 1.11781E-05 | 0.00506057  |
| 452.759994 | 436.505306  | 9.85132E-06 | 0.004460282 |
| 452.799994 | 384.486914  | 8.67733E-06 | 0.003929097 |
| 452.839994 | 374.257674  | 8.44647E-06 | 0.003824901 |
| 452.879994 | 438.917654  | 9.90576E-06 | 0.004486121 |
| 452.919994 | 764.408207  | 1.72516E-05 | 0.007813607 |
| 452.959994 | 1525.333975 | 3.44247E-05 | 0.015592995 |
| 452.999994 | 2838.211335 | 6.40545E-05 | 0.029016677 |
| 453.039994 | 4773.668648 | 0.000107735 | 0.048808287 |
| 453.079994 | 7076.88906  | 0.000159716 | 0.072363911 |
| 453.119994 | 9193.430801 | 0.000207483 | 0.094014663 |
| 453.159994 | 10458.60377 | 0.000236036 | 0.106962126 |
| 453.199994 | 10593.88702 | 0.000239089 | 0.108355258 |
| 453.239994 | 9734.468903 | 0.000219693 | 0.099573837 |
| 453.279994 | 8202.030702 | 0.000185108 | 0.083905938 |
| 453.319994 | 6358.672727 | 0.000143506 | 0.065054314 |
| 453.359994 | 4434.885439 | 0.000100089 | 0.045376433 |
| 453.399994 | 2812.195298 | 6.34673E-05 | 0.028776087 |
| 453.439994 | 1622.801117 | 3.66244E-05 | 0.01660695  |
| 453.479994 | 911.761588  | 2.05772E-05 | 0.009331344 |
| 453.519994 | 614.379359  | 1.38657E-05 | 0.006288366 |
| 453.559994 | 540.54753   | 1.21994E-05 | 0.005533162 |
| 453.599994 | 527.385077  | 1.19023E-05 | 0.005398904 |

|            |             |             |             |
|------------|-------------|-------------|-------------|
| 453.639994 | 533.116423  | 1.20317E-05 | 0.005458058 |
| 453.679994 | 512.585715  | 1.15683E-05 | 0.005248327 |
| 453.719994 | 437.074167  | 9.86416E-06 | 0.004475564 |
| 453.759994 | 359.557305  | 8.11471E-06 | 0.00368213  |
| 453.799994 | 335.24544   | 7.56602E-06 | 0.003433461 |
| 453.839994 | 341.395848  | 7.70483E-06 | 0.003496759 |
| 453.879994 | 351.058898  | 7.92291E-06 | 0.00359605  |
| 453.919994 | 435.071199  | 9.81895E-06 | 0.004457018 |
| 453.959994 | 647.520336  | 1.46136E-05 | 0.006634004 |
| 453.999994 | 1096.55032  | 2.47476E-05 | 0.011235416 |
| 454.039994 | 1944.816399 | 4.38918E-05 | 0.019928631 |
| 454.079994 | 3183.183599 | 7.184E-05   | 0.032621116 |
| 454.119994 | 4458.541683 | 0.000100623 | 0.04569495  |
| 454.159994 | 5497.650941 | 0.000124074 | 0.056349594 |
| 454.199994 | 6129.434002 | 0.000138333 | 0.062830751 |
| 454.239994 | 6079.789598 | 0.000137212 | 0.062327352 |
| 454.279994 | 5278.093242 | 0.000119119 | 0.054113475 |
| 454.319994 | 3997.888814 | 9.02268E-05 | 0.040991831 |
| 454.359994 | 2726.825093 | 6.15406E-05 | 0.027961607 |
| 454.399994 | 1696.693742 | 3.8292E-05  | 0.017399891 |
| 454.439994 | 963.563786  | 2.17463E-05 | 0.009882385 |
| 454.479994 | 573.261535  | 1.29377E-05 | 0.005879932 |
| 454.519994 | 436.869547  | 9.85954E-06 | 0.004481357 |
| 454.559994 | 443.915394  | 1.00186E-05 | 0.004554033 |
| 454.599994 | 474.105408  | 1.06999E-05 | 0.004864174 |
| 454.639994 | 510.816881  | 1.15284E-05 | 0.005241283 |
| 454.679994 | 518.177523  | 1.16945E-05 | 0.005317276 |
| 454.719994 | 444.796522  | 1.00384E-05 | 0.004564678 |
| 454.759994 | 380.960977  | 8.59776E-06 | 0.003909917 |
| 454.799994 | 355.106861  | 8.01427E-06 | 0.003644889 |
| 454.839994 | 366.753479  | 8.27712E-06 | 0.003764763 |
| 454.879994 | 411.008181  | 9.27588E-06 | 0.004219413 |
| 454.919994 | 495.826386  | 1.11901E-05 | 0.005090605 |
| 454.959994 | 797.52772   | 1.79991E-05 | 0.008188866 |
| 454.999994 | 1431.660209 | 3.23106E-05 | 0.014701312 |
| 455.039994 | 2445.513602 | 5.51918E-05 | 0.025114493 |
| 455.079994 | 3813.524528 | 8.60659E-05 | 0.039166886 |
| 455.119994 | 5135.516044 | 0.000115901 | 0.052749064 |
| 455.159994 | 6035.084545 | 0.000136203 | 0.061994362 |
| 455.199994 | 6370.74386  | 0.000143779 | 0.065448116 |
| 455.239994 | 6070.564846 | 0.000137004 | 0.062369788 |
| 455.279994 | 5369.78618  | 0.000121189 | 0.055174743 |
| 455.319994 | 4460.573613 | 0.000100669 | 0.045836578 |
| 455.359994 | 3443.617765 | 7.77177E-05 | 0.035389512 |
| 455.399994 | 2435.662099 | 5.49695E-05 | 0.02503311  |
| 455.439994 | 1558.74879  | 3.51788E-05 | 0.016021827 |

|            |             |             |             |
|------------|-------------|-------------|-------------|
| 455.479994 | 928.630771  | 2.09579E-05 | 0.009545906 |
| 455.519994 | 590.727845  | 1.33319E-05 | 0.006072949 |
| 455.559994 | 509.811132  | 1.15057E-05 | 0.005241549 |
| 455.599994 | 535.95987   | 1.20959E-05 | 0.005510877 |
| 455.639994 | 575.206598  | 1.29816E-05 | 0.005914941 |
| 455.679994 | 576.306158  | 1.30064E-05 | 0.005926769 |
| 455.719994 | 527.064975  | 1.18951E-05 | 0.005420845 |
| 455.759994 | 451.625299  | 1.01926E-05 | 0.004645358 |
| 455.799994 | 374.650774  | 8.45535E-06 | 0.003853947 |
| 455.839994 | 351.499216  | 7.93285E-06 | 0.003616109 |
| 455.879994 | 372.769856  | 8.4129E-06  | 0.003835271 |
| 455.919994 | 421.652712  | 9.51611E-06 | 0.004338587 |
| 455.959994 | 566.472141  | 1.27845E-05 | 0.005829215 |
| 455.999994 | 931.078733  | 2.10132E-05 | 0.009581996 |
| 456.039994 | 1612.594811 | 3.6394E-05  | 0.016597128 |
| 456.079994 | 2586.963764 | 5.83842E-05 | 0.026627851 |
| 456.119994 | 3557.717866 | 8.02927E-05 | 0.036623123 |
| 456.159994 | 4301.285951 | 9.7074E-05  | 0.04428129  |
| 456.199994 | 4684.964543 | 0.000105733 | 0.048235451 |
| 456.239994 | 4514.921741 | 0.000101895 | 0.0464888   |
| 456.279994 | 3920.50885  | 8.84804E-05 | 0.040371847 |
| 456.319994 | 3096.311268 | 6.98794E-05 | 0.031887382 |
| 456.359994 | 2183.422472 | 4.92768E-05 | 0.022487962 |
| 456.399994 | 1364.665531 | 3.07986E-05 | 0.014056481 |
| 456.439994 | 831.439625  | 1.87644E-05 | 0.008564838 |
| 456.479994 | 540.930382  | 1.2208E-05  | 0.005572728 |
| 456.519994 | 411.262154  | 9.28161E-06 | 0.004237242 |
| 456.559994 | 405.49589   | 9.15148E-06 | 0.004178198 |
| 456.599994 | 464.082471  | 1.04737E-05 | 0.004782289 |
| 456.639994 | 528.039507  | 1.19171E-05 | 0.005441832 |
| 456.679994 | 523.68384   | 1.18188E-05 | 0.005397416 |
| 456.719994 | 494.420653  | 1.11584E-05 | 0.005096258 |
| 456.759994 | 439.316699  | 9.91477E-06 | 0.004528668 |
| 456.799994 | 389.055263  | 8.78044E-06 | 0.004010903 |
| 456.839994 | 372.293046  | 8.40214E-06 | 0.003838432 |
| 456.879994 | 446.298391  | 1.00723E-05 | 0.004601847 |
| 456.919994 | 667.997126  | 1.50758E-05 | 0.006888418 |
| 456.959994 | 1112.541378 | 2.51085E-05 | 0.011473584 |
| 456.999994 | 1894.046251 | 4.2746E-05  | 0.019534915 |
| 457.039994 | 3039.709177 | 6.8602E-05  | 0.031353859 |
| 457.079994 | 4313.075248 | 9.73401E-05 | 0.044492213 |
| 457.119994 | 5471.280539 | 0.000123479 | 0.056444802 |
| 457.159994 | 6164.76912  | 0.00013913  | 0.063604785 |
| 457.199994 | 6211.922876 | 0.000140194 | 0.0640969   |
| 457.239994 | 5704.772709 | 0.000128749 | 0.058869089 |
| 457.279994 | 4701.194681 | 0.000106099 | 0.04851714  |



|            |             |             |             |
|------------|-------------|-------------|-------------|
| 457.319994 | 3417.829164 | 7.71356E-05 | 0.035275672 |
| 457.359994 | 2269.991211 | 5.12305E-05 | 0.023430799 |
| 457.399994 | 1411.336475 | 3.18519E-05 | 0.014569058 |
| 457.439994 | 820.034037  | 1.8507E-05  | 0.008465854 |
| 457.479994 | 501.01928   | 1.13073E-05 | 0.005172867 |
| 457.519994 | 392.22917   | 8.85207E-06 | 0.004049997 |
| 457.559994 | 402.816895  | 9.09102E-06 | 0.004159685 |
| 457.599994 | 447.138643  | 1.00913E-05 | 0.004617777 |
| 457.639994 | 476.777552  | 1.07602E-05 | 0.0049243   |
| 457.679994 | 517.171793  | 1.16718E-05 | 0.005341971 |
| 457.719994 | 488.475779  | 1.10242E-05 | 0.005046005 |
| 457.759994 | 397.559866  | 8.97237E-06 | 0.004107193 |
| 457.799994 | 319.491416  | 7.21048E-06 | 0.003300956 |
| 457.839994 | 312.556832  | 7.05397E-06 | 0.003229591 |
| 457.879994 | 348.715626  | 7.87003E-06 | 0.003603527 |
| 457.919994 | 417.595657  | 9.42455E-06 | 0.004315691 |
| 457.959994 | 638.134551  | 1.44018E-05 | 0.006595452 |
| 457.999994 | 1066.797096 | 2.40761E-05 | 0.011026865 |
| 458.039994 | 1714.010035 | 3.86828E-05 | 0.017718278 |
| 458.079994 | 2519.041444 | 5.68513E-05 | 0.026042423 |
| 458.119994 | 3286.563169 | 7.41732E-05 | 0.033980204 |
| 458.159994 | 3793.041541 | 8.56037E-05 | 0.039220174 |
| 458.199994 | 3918.076635 | 8.84255E-05 | 0.040516578 |
| 458.239994 | 3686.965113 | 8.32097E-05 | 0.038129997 |
| 458.279994 | 3093.463066 | 6.98152E-05 | 0.031994888 |
| 458.319994 | 2357.732547 | 5.32107E-05 | 0.024387546 |
| 458.359994 | 1602.346149 | 3.61627E-05 | 0.016575544 |
| 458.399994 | 1005.567503 | 2.26943E-05 | 0.010403048 |
| 458.439994 | 603.196581  | 1.36133E-05 | 0.006240884 |
| 458.479994 | 414.046667  | 9.34446E-06 | 0.004284246 |
| 458.519994 | 383.382306  | 8.6524E-06  | 0.003967301 |
| 458.559994 | 414.154155  | 9.34688E-06 | 0.004286106 |
| 458.599994 | 442.125166  | 9.97815E-06 | 0.004575979 |
| 458.639994 | 480.200059  | 1.08374E-05 | 0.004970486 |
| 458.679994 | 503.032811  | 1.13527E-05 | 0.005207279 |
| 458.719994 | 530.687038  | 1.19769E-05 | 0.005494028 |
| 458.759994 | 545.312514  | 1.23069E-05 | 0.005645934 |
| 458.799994 | 487.084591  | 1.09928E-05 | 0.005043506 |
| 458.839994 | 433.886397  | 9.79221E-06 | 0.004493058 |
| 458.879994 | 448.077005  | 1.01125E-05 | 0.004640412 |
| 458.919994 | 584.395428  | 1.3189E-05  | 0.006052692 |
| 458.959994 | 911.23255   | 2.05652E-05 | 0.009438627 |
| 458.999994 | 1607.220947 | 3.62727E-05 | 0.016649187 |
| 459.039994 | 2647.653594 | 5.97539E-05 | 0.027429409 |
| 459.079994 | 3678.883969 | 8.30273E-05 | 0.038116166 |
| 459.119994 | 4552.709322 | 0.000102748 | 0.047173803 |

|            |             |             |             |
|------------|-------------|-------------|-------------|
| 459.159994 | 5082.198631 | 0.000114698 | 0.052664799 |
| 459.199994 | 5175.770267 | 0.00011681  | 0.053639117 |
| 459.239994 | 4742.498653 | 0.000107032 | 0.049153186 |
| 459.279994 | 3957.203143 | 8.93086E-05 | 0.041017636 |
| 459.319994 | 3018.398807 | 6.81211E-05 | 0.031289363 |
| 459.359994 | 2038.59674  | 4.60083E-05 | 0.021134367 |
| 459.399994 | 1216.978098 | 2.74655E-05 | 0.012617651 |
| 459.439994 | 702.832092  | 1.58619E-05 | 0.00728761  |
| 459.479994 | 440.103942  | 9.93253E-06 | 0.0045638   |
| 459.519994 | 366.344579  | 8.26789E-06 | 0.003799259 |
| 459.559994 | 406.472928  | 9.17353E-06 | 0.004215786 |
| 459.599994 | 460.124575  | 1.03844E-05 | 0.004772657 |
| 459.639994 | 501.838411  | 1.13258E-05 | 0.005205788 |
| 459.679994 | 487.302133  | 1.09977E-05 | 0.005055437 |
| 459.719994 | 424.679513  | 9.58443E-06 | 0.004406152 |
| 459.759994 | 362.451792  | 8.18003E-06 | 0.003760852 |
| 459.799994 | 319.88181   | 7.21929E-06 | 0.003319428 |
| 459.839994 | 297.146758  | 6.70619E-06 | 0.003083774 |
| 459.879994 | 289.54955   | 6.53473E-06 | 0.003005192 |
| 459.919994 | 375.439856  | 8.47315E-06 | 0.003896973 |
| 459.959994 | 582.508235  | 1.31464E-05 | 0.006046818 |
| 459.999994 | 1016.458938 | 2.29401E-05 | 0.010552429 |
| 460.039994 | 1737.760653 | 3.92188E-05 | 0.018042234 |
| 460.079994 | 2543.770607 | 5.74094E-05 | 0.026412898 |
| 460.119994 | 3210.235123 | 7.24505E-05 | 0.03333594  |
| 460.159994 | 3672.203873 | 8.28765E-05 | 0.038136462 |
| 460.199994 | 3778.164272 | 8.52679E-05 | 0.039240289 |
| 460.239994 | 3531.384375 | 7.96984E-05 | 0.036680403 |
| 460.279994 | 2963.900223 | 6.68911E-05 | 0.030788635 |
| 460.319994 | 2175.998027 | 4.91092E-05 | 0.022605967 |
| 460.359994 | 1438.272337 | 3.24598E-05 | 0.014943195 |
| 460.399994 | 904.580987  | 2.04151E-05 | 0.009399127 |
| 460.439994 | 552.819386  | 1.24764E-05 | 0.005744617 |
| 460.479994 | 380.231547  | 8.5813E-06  | 0.003951515 |
| 460.519994 | 345.075859  | 7.78788E-06 | 0.003586475 |
| 460.559994 | 389.109057  | 8.78165E-06 | 0.004044476 |
| 460.599994 | 458.778407  | 1.0354E-05  | 0.004769048 |
| 460.639994 | 518.293773  | 1.16972E-05 | 0.005388184 |
| 460.679994 | 507.066038  | 1.14438E-05 | 0.005271918 |
| 460.719994 | 460.757742  | 1.03987E-05 | 0.004790871 |
| 460.759994 | 410.566124  | 9.26591E-06 | 0.004269359 |
| 460.799994 | 383.162766  | 8.64745E-06 | 0.003984745 |
| 460.839994 | 408.091832  | 9.21006E-06 | 0.004244366 |
| 460.879994 | 526.671432  | 1.18862E-05 | 0.005478131 |
| 460.919994 | 872.156254  | 1.96834E-05 | 0.00907245  |
| 460.959994 | 1634.278448 | 3.68834E-05 | 0.017001766 |

|            |             |             |             |
|------------|-------------|-------------|-------------|
| 460.999994 | 2946.725042 | 6.65035E-05 | 0.030658104 |
| 461.039994 | 4820.659153 | 0.000108796 | 0.050159105 |
| 461.079994 | 6755.970738 | 0.000152473 | 0.07030218  |
| 461.119994 | 8005.869417 | 0.000180681 | 0.08331577  |
| 461.159994 | 8246.268221 | 0.000186107 | 0.085825005 |
| 461.199994 | 7751.30658  | 0.000174936 | 0.080680571 |
| 461.239994 | 6685.091117 | 0.000150873 | 0.069588752 |
| 461.279994 | 5347.32914  | 0.000120682 | 0.055668086 |
| 461.319994 | 3880.824307 | 8.75848E-05 | 0.040404619 |
| 461.359994 | 2531.627703 | 5.71353E-05 | 0.026359947 |
| 461.399994 | 1480.40857  | 3.34108E-05 | 0.015415724 |
| 461.439994 | 820.971152  | 1.85282E-05 | 0.008549641 |
| 461.479994 | 502.54081   | 1.13416E-05 | 0.005233943 |
| 461.519994 | 395.296172  | 8.92128E-06 | 0.004117351 |
| 461.559994 | 414.031226  | 9.34411E-06 | 0.004312866 |
| 461.599994 | 489.401519  | 1.10451E-05 | 0.005098423 |
| 461.639994 | 521.768671  | 1.17756E-05 | 0.005436084 |
| 461.679994 | 501.271193  | 1.1313E-05  | 0.005222982 |
| 461.719994 | 472.561109  | 1.0665E-05  | 0.004924265 |
| 461.759994 | 437.040515  | 9.8634E-06  | 0.004554522 |
| 461.799994 | 379.650926  | 8.56819E-06 | 0.003956791 |
| 461.839994 | 318.329343  | 7.18425E-06 | 0.003317974 |
| 461.879994 | 328.894188  | 7.42268E-06 | 0.003428389 |
| 461.919994 | 446.539233  | 1.00778E-05 | 0.004655123 |
| 461.959994 | 750.76622   | 1.69437E-05 | 0.007827334 |
| 461.999994 | 1378.089857 | 3.11016E-05 | 0.014368924 |
| 462.039994 | 2230.412251 | 5.03373E-05 | 0.023257845 |
| 462.079994 | 3130.531956 | 7.06517E-05 | 0.032646758 |
| 462.119994 | 3855.338823 | 8.70096E-05 | 0.040208888 |
| 462.159994 | 4215.09876  | 9.51289E-05 | 0.043964775 |
| 462.199994 | 4129.014671 | 9.31861E-05 | 0.043070619 |
| 462.239994 | 3658.776048 | 8.25735E-05 | 0.038168765 |
| 462.279994 | 2948.58466  | 6.65454E-05 | 0.03076263  |
| 462.319994 | 2201.052091 | 4.96747E-05 | 0.022965598 |
| 462.359994 | 1490.249074 | 3.36328E-05 | 0.015550482 |
| 462.399994 | 940.012346  | 2.12148E-05 | 0.009809709 |
| 462.439994 | 603.340897  | 1.36166E-05 | 0.006296844 |
| 462.479994 | 451.743722  | 1.01952E-05 | 0.004715088 |
| 462.519994 | 451.873834  | 1.01982E-05 | 0.004716854 |
| 462.559994 | 523.123194  | 1.18062E-05 | 0.005461058 |
| 462.599994 | 647.122492  | 1.46047E-05 | 0.006756113 |
| 462.639994 | 737.223877  | 1.66381E-05 | 0.007697458 |
| 462.679994 | 813.985288  | 1.83705E-05 | 0.008499669 |
| 462.719994 | 897.845316  | 2.02631E-05 | 0.00937615  |
| 462.759994 | 1097.690134 | 2.47733E-05 | 0.011464109 |
| 462.799994 | 1826.029744 | 4.12109E-05 | 0.019072426 |

|            |             |             |             |
|------------|-------------|-------------|-------------|
| 462.839994 | 4539.815859 | 0.000102457 | 0.047421346 |
| 462.879994 | 13658.76417 | 0.000308259 | 0.142687055 |
| 462.919994 | 38103.44369 | 0.000859942 | 0.398084184 |
| 462.959994 | 90132.19683 | 0.002034158 | 0.94173384  |
| 462.999994 | 171982.9516 | 0.003881416 | 1.79709543  |
| 463.039994 | 264544.373  | 0.005970398 | 2.764533063 |
| 463.079994 | 327364.9195 | 0.00738817  | 3.421313836 |
| 463.119994 | 329299.4732 | 0.00743183  | 3.441829266 |
| 463.159994 | 270681.6937 | 0.006108909 | 2.829402162 |
| 463.199994 | 184406.8349 | 0.004161805 | 1.927748239 |
| 463.239994 | 105345.9523 | 0.002377511 | 1.101358371 |
| 463.279994 | 51605.49301 | 0.001164664 | 0.539565576 |
| 463.319994 | 22122.98784 | 0.000499285 | 0.231328733 |
| 463.359994 | 8709.555527 | 0.000196563 | 0.091079216 |
| 463.399994 | 3298.323519 | 7.44386E-05 | 0.034494832 |
| 463.439994 | 1323.052209 | 2.98594E-05 | 0.013838061 |
| 463.479994 | 658.060723  | 1.48515E-05 | 0.00688338  |
| 463.519994 | 480.346511  | 1.08408E-05 | 0.005024905 |
| 463.559994 | 474.847475  | 1.07166E-05 | 0.004967808 |
| 463.599994 | 503.133758  | 1.1355E-05  | 0.005264191 |
| 463.639994 | 537.359816  | 1.21275E-05 | 0.005622777 |
| 463.679994 | 526.015772  | 1.18714E-05 | 0.005504551 |
| 463.719994 | 466.715033  | 1.05331E-05 | 0.004884413 |
| 463.759994 | 416.633273  | 9.40283E-06 | 0.004360658 |
| 463.799994 | 488.426746  | 1.10231E-05 | 0.005112519 |
| 463.839994 | 1075.454985 | 2.42715E-05 | 0.011258102 |
| 463.879994 | 3058.073986 | 6.90165E-05 | 0.03201536  |
| 463.919994 | 8332.578459 | 0.000188055 | 0.08724233  |
| 463.959994 | 20033.19996 | 0.000452121 | 0.209766251 |
| 463.999994 | 39553.71434 | 0.000892672 | 0.414199914 |
| 464.039994 | 63066.07342 | 0.001423313 | 0.660474357 |
| 464.079994 | 80121.9031  | 0.00180824  | 0.839167893 |
| 464.119994 | 81525.75126 | 0.001839923 | 0.853944889 |
| 464.159994 | 67104.70054 | 0.00151446  | 0.702951569 |
| 464.199994 | 45785.72782 | 0.00103332  | 0.479667185 |
| 464.239994 | 26503.4537  | 0.000598146 | 0.277683311 |
| 464.279994 | 13460.81521 | 0.000303792 | 0.141044478 |
| 464.319994 | 6218.408845 | 0.000140341 | 0.065163052 |
| 464.359994 | 2719.345673 | 6.13718E-05 | 0.028498629 |
| 464.399994 | 1225.63109  | 2.76608E-05 | 0.012845669 |
| 464.439994 | 692.53993   | 1.56297E-05 | 0.00725904  |
| 464.479994 | 501.01339   | 1.13072E-05 | 0.005251956 |
| 464.519994 | 464.96896   | 1.04937E-05 | 0.004874534 |
| 464.559994 | 528.202117  | 1.19208E-05 | 0.00553792  |
| 464.599994 | 665.894539  | 1.50283E-05 | 0.006982154 |
| 464.639994 | 802.599859  | 1.81136E-05 | 0.008416285 |

|            |             |             |             |
|------------|-------------|-------------|-------------|
| 464.679994 | 892.956195  | 2.01528E-05 | 0.009364593 |
| 464.719994 | 956.88261   | 2.15955E-05 | 0.010035864 |
| 464.759994 | 1108.556391 | 2.50186E-05 | 0.011627632 |
| 464.799994 | 1399.77567  | 3.1591E-05  | 0.014683491 |
| 464.839994 | 1989.851847 | 4.49082E-05 | 0.02087512  |
| 464.879994 | 3369.479731 | 7.60445E-05 | 0.03535155  |
| 464.919994 | 6720.835047 | 0.00015168  | 0.070519012 |
| 464.959994 | 13332.23887 | 0.00030089  | 0.139901841 |
| 464.999994 | 23532.49912 | 0.000531096 | 0.24695951  |
| 465.039994 | 35419.51635 | 0.000799369 | 0.371738624 |
| 465.079994 | 44189.64689 | 0.000997299 | 0.46382371  |
| 465.119994 | 45236.8647  | 0.001020933 | 0.474856363 |
| 465.159994 | 38226.69421 | 0.000862723 | 0.401304339 |
| 465.199994 | 27295.12768 | 0.000616013 | 0.28656925  |
| 465.239994 | 17018.4993  | 0.000384084 | 0.178691156 |
| 465.279994 | 9627.378483 | 0.000217277 | 0.101094419 |
| 465.319994 | 5020.7276   | 0.000113311 | 0.052725794 |
| 465.359994 | 2483.871546 | 5.60575E-05 | 0.026086928 |
| 465.399994 | 1212.022328 | 2.73537E-05 | 0.012730391 |
| 465.439994 | 654.110943  | 1.47624E-05 | 0.006870999 |
| 465.479994 | 442.635015  | 9.98966E-06 | 0.004649985 |
| 465.519994 | 385.296189  | 8.6956E-06  | 0.004047975 |
| 465.559994 | 422.630382  | 9.53818E-06 | 0.004440595 |
| 465.599994 | 485.454015  | 1.0956E-05  | 0.005101123 |
| 465.639994 | 555.112271  | 1.25281E-05 | 0.005833589 |
| 465.679994 | 581.509746  | 1.31239E-05 | 0.006111521 |
| 465.719994 | 564.183448  | 1.27328E-05 | 0.005929936 |
| 465.759994 | 518.702297  | 1.17064E-05 | 0.005452367 |
| 465.799994 | 486.771944  | 1.09858E-05 | 0.005117169 |
| 465.839994 | 523.819723  | 1.18219E-05 | 0.005507105 |
| 465.879994 | 693.533947  | 1.56521E-05 | 0.007291998 |
| 465.919994 | 1231.082576 | 2.77838E-05 | 0.012945037 |
| 465.959994 | 2470.964085 | 5.57662E-05 | 0.025984826 |
| 465.999994 | 4636.1729   | 0.000104632 | 0.048758495 |
| 466.039994 | 7559.935782 | 0.000170617 | 0.079514448 |
| 466.079994 | 10261.11216 | 0.000231579 | 0.107934343 |
| 466.119994 | 11425.81825 | 0.000257865 | 0.12019594  |
| 466.159994 | 10728.32001 | 0.000242123 | 0.112868168 |
| 466.199994 | 8681.202465 | 0.000195923 | 0.091339137 |
| 466.239994 | 6235.792849 | 0.000140733 | 0.065615427 |
| 466.279994 | 4062.658281 | 9.16885E-05 | 0.042752531 |
| 466.319994 | 2452.391236 | 5.53471E-05 | 0.025809438 |
| 466.359994 | 1401.408984 | 3.16278E-05 | 0.014749963 |
| 466.399994 | 767.158002  | 1.73137E-05 | 0.008075104 |
| 466.439994 | 447.054143  | 1.00894E-05 | 0.004706095 |
| 466.479994 | 332.68193   | 7.50817E-06 | 0.00350241  |

|            |             |             |             |
|------------|-------------|-------------|-------------|
| 466.519994 | 325.483703  | 7.34571E-06 | 0.003426922 |
| 466.559994 | 381.651533  | 8.61334E-06 | 0.004018641 |
| 466.599994 | 463.990935  | 1.04716E-05 | 0.004886062 |
| 466.639994 | 493.952258  | 1.11478E-05 | 0.005202016 |
| 466.679994 | 505.490695  | 1.14082E-05 | 0.005323988 |
| 466.719994 | 478.354251  | 1.07958E-05 | 0.005038611 |
| 466.759994 | 412.314895  | 9.30537E-06 | 0.004343376 |
| 466.799994 | 341.455804  | 7.70618E-06 | 0.003597246 |
| 466.839994 | 328.684842  | 7.41796E-06 | 0.003463    |
| 466.879994 | 435.49797   | 9.82858E-06 | 0.004588769 |
| 466.919994 | 717.73555   | 1.61983E-05 | 0.007563306 |
| 466.959994 | 1340.850113 | 3.02611E-05 | 0.014130732 |
| 466.999994 | 2486.338676 | 5.61132E-05 | 0.026204864 |
| 467.039994 | 4122.7188   | 9.3044E-05  | 0.043455279 |
| 467.079994 | 5790.783191 | 0.00013069  | 0.061042643 |
| 467.119994 | 7060.721029 | 0.000159351 | 0.074435869 |
| 467.159994 | 7604.42341  | 0.000171621 | 0.080174579 |
| 467.199994 | 7286.48474  | 0.000164446 | 0.076829082 |
| 467.239994 | 6301.481533 | 0.000142216 | 0.066448845 |
| 467.279994 | 4949.932023 | 0.000111713 | 0.052201283 |
| 467.319994 | 3496.508666 | 7.89113E-05 | 0.036876842 |
| 467.359994 | 2233.310085 | 5.04027E-05 | 0.023556205 |
| 467.399994 | 1269.422236 | 2.86491E-05 | 0.013390585 |
| 467.439994 | 683.383959  | 1.5423E-05  | 0.007209338 |
| 467.479994 | 420.730131  | 9.49529E-06 | 0.00443886  |
| 467.519994 | 355.393405  | 8.02073E-06 | 0.003749854 |
| 467.559994 | 392.770242  | 8.86428E-06 | 0.004144581 |
| 467.599994 | 464.296013  | 1.04785E-05 | 0.004899753 |
| 467.639994 | 505.443459  | 1.14072E-05 | 0.005334442 |
| 467.679994 | 513.220924  | 1.15827E-05 | 0.005416988 |
| 467.719994 | 462.44203   | 1.04367E-05 | 0.00488144  |
| 467.759994 | 382.337048  | 8.62881E-06 | 0.004036214 |
| 467.799994 | 311.203413  | 7.02343E-06 | 0.003285559 |
| 467.839994 | 283.230433  | 6.39212E-06 | 0.002990488 |
| 467.879994 | 306.718818  | 6.92222E-06 | 0.003238767 |
| 467.919994 | 380.319648  | 8.58328E-06 | 0.004016291 |
| 467.959994 | 589.113221  | 1.32955E-05 | 0.006221746 |
| 467.999994 | 1040.674923 | 2.34866E-05 | 0.010991721 |
| 468.039994 | 1737.250968 | 3.92073E-05 | 0.018350601 |
| 468.079994 | 2668.700034 | 6.02288E-05 | 0.028191916 |
| 468.119994 | 3609.215456 | 8.1455E-05  | 0.038130698 |
| 468.159994 | 4257.897881 | 9.60948E-05 | 0.044987752 |
| 468.199994 | 4419.100688 | 9.97329E-05 | 0.046694965 |
| 468.239994 | 4043.610644 | 9.12587E-05 | 0.042730954 |
| 468.279994 | 3272.986544 | 7.38667E-05 | 0.03459032  |
| 468.319994 | 2354.704945 | 5.31424E-05 | 0.024887653 |

|            |             |             |             |
|------------|-------------|-------------|-------------|
| 468.359994 | 1549.588061 | 3.4972E-05  | 0.016379506 |
| 468.399994 | 944.090963  | 2.13068E-05 | 0.009980113 |
| 468.439994 | 556.45076   | 1.25583E-05 | 0.005882819 |
| 468.479994 | 376.348022  | 8.49365E-06 | 0.003979105 |
| 468.519994 | 331.425722  | 7.47982E-06 | 0.003504444 |
| 468.559994 | 368.291356  | 8.31182E-06 | 0.003894588 |
| 468.599994 | 442.818669  | 9.9938E-06  | 0.004683095 |
| 468.639994 | 506.450693  | 1.14299E-05 | 0.005356502 |
| 468.679994 | 509.085234  | 1.14893E-05 | 0.005384826 |
| 468.719994 | 459.598773  | 1.03725E-05 | 0.0048618   |
| 468.759994 | 378.574006  | 8.54389E-06 | 0.004005033 |
| 468.799994 | 325.436291  | 7.34464E-06 | 0.003443169 |
| 468.839994 | 293.734709  | 6.62918E-06 | 0.003108026 |
| 468.879994 | 322.650574  | 7.28177E-06 | 0.003414278 |
| 468.919994 | 448.218067  | 1.01157E-05 | 0.004743434 |
| 468.959994 | 804.031053  | 1.81459E-05 | 0.008509683 |
| 468.999994 | 1531.09125  | 3.45546E-05 | 0.016206106 |
| 469.039994 | 2613.073547 | 5.89734E-05 | 0.027660897 |
| 469.079994 | 3930.715769 | 8.87108E-05 | 0.041612452 |
| 469.119994 | 5166.838661 | 0.000116608 | 0.054703309 |
| 469.159994 | 5976.603482 | 0.000134884 | 0.063281996 |
| 469.199994 | 6230.329662 | 0.00014061  | 0.065974147 |
| 469.239994 | 6020.1167   | 0.000135866 | 0.063753596 |
| 469.279994 | 5244.12216  | 0.000118353 | 0.055540476 |
| 469.319994 | 4062.03797  | 9.16745E-05 | 0.043024694 |
| 469.359994 | 2779.708989 | 6.27342E-05 | 0.029444905 |
| 469.399994 | 1700.299084 | 3.83734E-05 | 0.018012465 |
| 469.439994 | 987.983343  | 2.22974E-05 | 0.010467295 |
| 469.479994 | 581.522068  | 1.31241E-05 | 0.006161523 |
| 469.519994 | 395.934771  | 8.9357E-06  | 0.004195488 |
| 469.559994 | 400.140409  | 9.03061E-06 | 0.004240414 |
| 469.599994 | 494.2406    | 1.11543E-05 | 0.00523807  |
| 469.639994 | 544.107919  | 1.22798E-05 | 0.005767065 |
| 469.679994 | 577.844623  | 1.30411E-05 | 0.006125166 |
| 469.719994 | 628.248683  | 1.41787E-05 | 0.006660018 |
| 469.759994 | 615.492784  | 1.38908E-05 | 0.006525349 |
| 469.799994 | 543.01121   | 1.2255E-05  | 0.005757402 |
| 469.839994 | 442.031724  | 9.97604E-06 | 0.004687143 |
| 469.879994 | 365.736787  | 8.25417E-06 | 0.003878469 |
| 469.919994 | 370.136475  | 8.35346E-06 | 0.00392546  |
| 469.959994 | 569.027835  | 1.28422E-05 | 0.006035304 |
| 469.999994 | 991.06066   | 2.23669E-05 | 0.010512423 |
| 470.039994 | 1620.444683 | 3.65712E-05 | 0.017189917 |
| 470.079994 | 2500.408593 | 5.64307E-05 | 0.026526962 |
| 470.119994 | 3468.324757 | 7.82753E-05 | 0.036798764 |
| 470.159994 | 4241.332917 | 9.5721E-05  | 0.045004174 |

|            |             |             |             |
|------------|-------------|-------------|-------------|
| 470.199994 | 4578.567157 | 0.000103332 | 0.048586651 |
| 470.239994 | 4484.463292 | 0.000101208 | 0.047592092 |
| 470.279994 | 3884.813492 | 8.76748E-05 | 0.041231718 |
| 470.319994 | 2959.37979  | 6.67891E-05 | 0.03141224  |
| 470.359994 | 2020.70789  | 4.56046E-05 | 0.021450562 |
| 470.399994 | 1230.131115 | 2.77623E-05 | 0.013059407 |
| 470.439994 | 712.271775  | 1.6075E-05  | 0.007562314 |
| 470.479994 | 482.882811  | 1.0898E-05  | 0.005127287 |
| 470.519994 | 428.825249  | 9.67799E-06 | 0.004553687 |
| 470.559994 | 444.808387  | 1.00387E-05 | 0.004723813 |
| 470.599994 | 524.798402  | 1.1844E-05  | 0.005573772 |
| 470.639994 | 547.193719  | 1.23494E-05 | 0.005812122 |
| 470.679994 | 516.691679  | 1.1661E-05  | 0.005488605 |
| 470.719994 | 480.594498  | 1.08463E-05 | 0.005105593 |
| 470.759994 | 470.259328  | 1.06131E-05 | 0.004996222 |
| 470.799994 | 455.160963  | 1.02723E-05 | 0.004836222 |
| 470.839994 | 443.77093   | 1.00153E-05 | 0.0047156   |
| 470.879994 | 498.275192  | 1.12454E-05 | 0.005295223 |
| 470.919994 | 716.225134  | 1.61642E-05 | 0.007612047 |
| 470.959994 | 1185.302562 | 2.67506E-05 | 0.012598476 |
| 470.999994 | 2037.938242 | 4.59934E-05 | 0.021662904 |
| 471.039994 | 3310.88307  | 7.4722E-05  | 0.035197059 |
| 471.079994 | 4882.789    | 0.000110198 | 0.051911954 |
| 471.119994 | 6281.127906 | 0.000141756 | 0.066784231 |
| 471.159994 | 7093.4078   | 0.000160088 | 0.075427218 |
| 471.199994 | 7137.297514 | 0.000161079 | 0.075900359 |
| 471.239994 | 6518.058999 | 0.000147104 | 0.069321058 |
| 471.279994 | 5490.236878 | 0.000123907 | 0.05839489  |
| 471.319994 | 4256.330185 | 9.60594E-05 | 0.045274736 |
| 471.359994 | 3064.421707 | 6.91597E-05 | 0.03259913  |
| 471.399994 | 2028.784518 | 4.57868E-05 | 0.021583916 |
| 471.439994 | 1224.057335 | 2.76253E-05 | 0.013023657 |
| 471.479994 | 709.975785  | 1.60232E-05 | 0.007554602 |
| 471.519994 | 471.292051  | 1.06364E-05 | 0.005015278 |
| 471.559994 | 409.82663   | 9.24922E-06 | 0.00436156  |
| 471.599994 | 426.40752   | 9.62342E-06 | 0.004538407 |
| 471.639994 | 453.005671  | 1.02237E-05 | 0.004821909 |
| 471.679994 | 464.023441  | 1.04724E-05 | 0.004939604 |
| 471.719994 | 443.22201   | 1.00029E-05 | 0.00471857  |
| 471.759994 | 384.877272  | 8.68614E-06 | 0.004097775 |
| 471.799994 | 323.409522  | 7.2989E-06  | 0.003443622 |
| 471.839994 | 300.172445  | 6.77447E-06 | 0.003196468 |
| 471.879994 | 339.052326  | 7.65194E-06 | 0.003610797 |
| 471.919994 | 442.321803  | 9.98259E-06 | 0.004710982 |
| 471.959994 | 626.207481  | 1.41326E-05 | 0.006670036 |
| 471.999994 | 1024.247079 | 2.31158E-05 | 0.010910672 |



|            |             |             |             |
|------------|-------------|-------------|-------------|
| 472.039994 | 1746.205575 | 3.94094E-05 | 0.018602826 |
| 472.079994 | 2760.598693 | 6.23029E-05 | 0.029411937 |
| 472.119994 | 3947.62111  | 8.90923E-05 | 0.042062261 |
| 472.159994 | 5117.230809 | 0.000115489 | 0.054529178 |
| 472.199994 | 6072.615191 | 0.00013705  | 0.064715229 |
| 472.239994 | 6426.03328  | 0.000145027 | 0.06848737  |
| 472.279994 | 5811.747152 | 0.000131163 | 0.061945679 |
| 472.319994 | 4506.316124 | 0.000101701 | 0.048035547 |
| 472.359994 | 3026.098142 | 6.82948E-05 | 0.032259741 |
| 472.399994 | 1778.88668  | 4.0147E-05  | 0.01896544  |
| 472.439994 | 936.944633  | 2.11455E-05 | 0.009989997 |
| 472.479994 | 514.588596  | 1.16135E-05 | 0.005487169 |
| 472.519994 | 375.204475  | 8.46784E-06 | 0.004001225 |
| 472.559994 | 379.896048  | 8.57372E-06 | 0.004051599 |
| 472.599994 | 401.317979  | 9.05719E-06 | 0.004280427 |
| 472.639994 | 448.847229  | 1.01299E-05 | 0.004787775 |
| 472.679994 | 527.469976  | 1.19043E-05 | 0.005626907 |
| 472.719994 | 607.42032   | 1.37086E-05 | 0.006480344 |
| 472.759994 | 622.932799  | 1.40587E-05 | 0.006646403 |
| 472.799994 | 578.707713  | 1.30606E-05 | 0.006175064 |
| 472.839994 | 509.239283  | 1.14928E-05 | 0.005434266 |
| 472.879994 | 486.650676  | 1.0983E-05  | 0.005193654 |
| 472.919994 | 579.539911  | 1.30794E-05 | 0.006185514 |
| 472.959994 | 901.592631  | 2.03477E-05 | 0.009623643 |
| 472.999994 | 1577.230435 | 3.55959E-05 | 0.016836858 |
| 473.039994 | 2627.131647 | 5.92907E-05 | 0.028046873 |
| 473.079994 | 3882.981918 | 8.76335E-05 | 0.041457653 |
| 473.119994 | 5030.454569 | 0.00011353  | 0.05371348  |
| 473.159994 | 5808.713461 | 0.000131095 | 0.062028707 |
| 473.199994 | 6141.047876 | 0.000138595 | 0.065583104 |
| 473.239994 | 5883.924647 | 0.000132792 | 0.062842478 |
| 473.279994 | 5055.310717 | 0.000114091 | 0.05399714  |
| 473.319994 | 3928.292035 | 8.86561E-05 | 0.041962695 |
| 473.359994 | 2746.908179 | 6.19939E-05 | 0.029345428 |
| 473.399994 | 1704.241474 | 3.84624E-05 | 0.018208079 |
| 473.439994 | 977.773161  | 2.2067E-05  | 0.01044739  |
| 473.479994 | 591.293201  | 1.33447E-05 | 0.006318431 |
| 473.519994 | 443.085679  | 9.99983E-06 | 0.004735118 |
| 473.559994 | 434.592516  | 9.80815E-06 | 0.004644746 |
| 473.599994 | 474.240916  | 1.0703E-05  | 0.00506892  |
| 473.639994 | 489.41356   | 1.10454E-05 | 0.005231535 |
| 473.679994 | 479.510136  | 1.08219E-05 | 0.005126106 |
| 473.719994 | 439.751455  | 9.92458E-06 | 0.004701471 |
| 473.759994 | 391.538036  | 8.83647E-06 | 0.004186365 |
| 473.799994 | 331.522617  | 7.482E-06   | 0.003544973 |
| 473.839994 | 297.834096  | 6.7217E-06  | 0.003185011 |

|            |             |             |             |
|------------|-------------|-------------|-------------|
| 473.879994 | 298.751922  | 6.74241E-06 | 0.003195095 |
| 473.919994 | 353.834154  | 7.98554E-06 | 0.003784509 |
| 473.959994 | 546.178383  | 1.23265E-05 | 0.005842261 |
| 473.999994 | 974.5209    | 2.19936E-05 | 0.010424956 |
| 474.039994 | 1736.576189 | 3.91921E-05 | 0.018578626 |
| 474.079994 | 2813.965395 | 6.35073E-05 | 0.030107531 |
| 474.119994 | 4027.897334 | 9.0904E-05  | 0.043099419 |
| 474.159994 | 5053.665837 | 0.000114054 | 0.054079938 |
| 474.199994 | 5626.047108 | 0.000126972 | 0.060210144 |
| 474.239994 | 5596.943692 | 0.000126315 | 0.059903731 |
| 474.279994 | 4858.584466 | 0.000109651 | 0.052005505 |
| 474.319994 | 3671.945466 | 8.28707E-05 | 0.039307227 |
| 474.359994 | 2535.996521 | 5.72339E-05 | 0.027149477 |
| 474.399994 | 1571.135651 | 3.54583E-05 | 0.016821438 |
| 474.439994 | 875.572756  | 1.97605E-05 | 0.009375151 |
| 474.479994 | 493.716097  | 1.11425E-05 | 0.005286886 |
| 474.519994 | 398.704091  | 8.9982E-06  | 0.004269824 |
| 474.559994 | 448.192965  | 1.01151E-05 | 0.004800217 |
| 474.599994 | 501.173352  | 1.13108E-05 | 0.005368098 |
| 474.639994 | 500.372836  | 1.12927E-05 | 0.005359976 |
| 474.679994 | 475.360935  | 1.07282E-05 | 0.005092478 |
| 474.719994 | 457.466678  | 1.03244E-05 | 0.004901192 |
| 474.759994 | 450.18833   | 1.01601E-05 | 0.00482362  |
| 474.799994 | 460.718407  | 1.03978E-05 | 0.004936862 |
| 474.839994 | 494.071434  | 1.11505E-05 | 0.005294705 |
| 474.879994 | 585.885163  | 1.32226E-05 | 0.006279154 |
| 474.919994 | 786.445788  | 1.7749E-05  | 0.008429348 |
| 474.959994 | 1210.621027 | 2.7322E-05  | 0.012976871 |
| 474.999994 | 2100.463208 | 4.74045E-05 | 0.022517151 |
| 475.039994 | 3379.385715 | 7.6268E-05  | 0.036230364 |
| 475.079994 | 4765.147944 | 0.000107543 | 0.05109141  |
| 475.119994 | 5939.225042 | 0.00013404  | 0.063685101 |
| 475.159994 | 6808.763349 | 0.000153664 | 0.07301513  |
| 475.199994 | 7310.308441 | 0.000164983 | 0.078400148 |
| 475.239994 | 7337.154797 | 0.000165589 | 0.078694688 |
| 475.279994 | 7073.304223 | 0.000159635 | 0.075871143 |
| 475.319994 | 6670.653216 | 0.000150547 | 0.071558166 |
| 475.359994 | 5949.664773 | 0.000134276 | 0.063829271 |
| 475.399994 | 4831.386629 | 0.000109038 | 0.051836506 |
| 475.439994 | 3531.040766 | 7.96907E-05 | 0.037888133 |
| 475.479994 | 2346.384739 | 5.29546E-05 | 0.02517887  |
| 475.519994 | 1434.905789 | 3.23838E-05 | 0.015399156 |
| 475.559994 | 914.933818  | 2.06488E-05 | 0.009819735 |
| 475.599994 | 728.258498  | 1.64358E-05 | 0.007816857 |
| 475.639994 | 650.625694  | 1.46837E-05 | 0.006984162 |
| 475.679994 | 556.245766  | 1.25537E-05 | 0.00597154  |

|            |             |             |             |
|------------|-------------|-------------|-------------|
| 475.719994 | 481.822998  | 1.08741E-05 | 0.005173014 |
| 475.759994 | 393.27613   | 8.87569E-06 | 0.0042227   |
| 475.799994 | 331.503966  | 7.48158E-06 | 0.003559737 |
| 475.839994 | 314.753709  | 7.10355E-06 | 0.003380155 |
| 475.879994 | 350.373792  | 7.90745E-06 | 0.003762997 |
| 475.919994 | 440.633552  | 9.94449E-06 | 0.004732779 |
| 475.959994 | 654.278613  | 1.47662E-05 | 0.0070281   |
| 475.999994 | 1046.885323 | 2.36267E-05 | 0.01124633  |
| 476.039994 | 1662.531438 | 3.7521E-05  | 0.017861506 |
| 476.079994 | 2441.915388 | 5.51106E-05 | 0.026237068 |
| 476.119994 | 3259.618562 | 7.35651E-05 | 0.035025791 |
| 476.159994 | 3813.753256 | 8.60711E-05 | 0.040983614 |
| 476.199994 | 3957.565238 | 8.93167E-05 | 0.042532629 |
| 476.239994 | 3910.146205 | 8.82466E-05 | 0.042026538 |
| 476.279994 | 3697.6019   | 8.34497E-05 | 0.039745434 |
| 476.319994 | 3271.180549 | 7.3826E-05  | 0.035164794 |
| 476.359994 | 2720.24327  | 6.13921E-05 | 0.029244741 |
| 476.399994 | 2110.691578 | 4.76354E-05 | 0.022693489 |
| 476.439994 | 1488.198356 | 3.35866E-05 | 0.016001982 |
| 476.479994 | 1021.439851 | 2.30525E-05 | 0.010984043 |
| 476.519994 | 713.404823  | 1.61006E-05 | 0.007672235 |
| 476.559994 | 554.332166  | 1.25105E-05 | 0.005962006 |
| 476.599994 | 553.568337  | 1.24933E-05 | 0.005954291 |
| 476.639994 | 610.508869  | 1.37783E-05 | 0.006567305 |
| 476.679994 | 666.32405   | 1.5038E-05  | 0.007168316 |
| 476.719994 | 616.505528  | 1.39137E-05 | 0.006632925 |
| 476.759994 | 559.345507  | 1.26236E-05 | 0.006018451 |
| 476.799994 | 570.107418  | 1.28665E-05 | 0.006134762 |
| 476.839994 | 770.703655  | 1.73937E-05 | 0.008294016 |
| 476.879994 | 1555.561049 | 3.51068E-05 | 0.016741753 |
| 476.919994 | 3772.263048 | 8.51347E-05 | 0.040602451 |
| 476.959994 | 8818.918127 | 0.000199031 | 0.094929681 |
| 476.999994 | 17766.10648 | 0.000400956 | 0.191256142 |
| 477.039994 | 29437.8385  | 0.000664371 | 0.316931543 |
| 477.079994 | 39434.37995 | 0.000889979 | 0.424591189 |
| 477.119994 | 43403.56743 | 0.000979558 | 0.467366736 |
| 477.159994 | 39318.91592 | 0.000887373 | 0.423418974 |
| 477.199994 | 29947.32789 | 0.000675869 | 0.322524911 |
| 477.239994 | 19710.86012 | 0.000444847 | 0.212298616 |
| 477.279994 | 11610.37242 | 0.00026203  | 0.125061645 |
| 477.319994 | 6268.016363 | 0.00014146  | 0.067521877 |
| 477.359994 | 3221.208202 | 7.26982E-05 | 0.034703204 |
| 477.399994 | 1634.979703 | 3.68992E-05 | 0.017615685 |
| 477.439994 | 869.672653  | 1.96273E-05 | 0.009370858 |
| 477.479994 | 551.141135  | 1.24385E-05 | 0.005939129 |
| 477.519994 | 424.045064  | 9.57011E-06 | 0.004569917 |

|            |             |             |             |
|------------|-------------|-------------|-------------|
| 477.559994 | 419.90494   | 9.47667E-06 | 0.004525678 |
| 477.599994 | 494.727764  | 1.11653E-05 | 0.005332555 |
| 477.639994 | 551.657664  | 1.24501E-05 | 0.005946687 |
| 477.679994 | 550.515045  | 1.24244E-05 | 0.005934867 |
| 477.719994 | 539.850269  | 1.21837E-05 | 0.005820382 |
| 477.759994 | 503.528195  | 1.13639E-05 | 0.005429231 |
| 477.799994 | 439.612896  | 9.92145E-06 | 0.004740469 |
| 477.839994 | 406.900489  | 9.18318E-06 | 0.004388089 |
| 477.879994 | 524.583751  | 1.18391E-05 | 0.005657681 |
| 477.919994 | 1030.856916 | 2.3265E-05  | 0.011118811 |
| 477.959994 | 2324.211964 | 5.24542E-05 | 0.025071022 |
| 477.999994 | 4734.868017 | 0.000106859 | 0.051078781 |
| 478.039994 | 8128.444793 | 0.000183448 | 0.087695326 |
| 478.079994 | 11179.75435 | 0.000252311 | 0.120625073 |
| 478.119994 | 12735.34033 | 0.000287419 | 0.137420719 |
| 478.159994 | 12035.10596 | 0.000271616 | 0.129875703 |
| 478.199994 | 9688.310466 | 0.000218652 | 0.104559228 |
| 478.239994 | 6918.343522 | 0.000156137 | 0.074671138 |
| 478.279994 | 4586.141992 | 0.000103503 | 0.049503336 |
| 478.319994 | 2819.864952 | 6.36404E-05 | 0.030440487 |
| 478.359994 | 1633.229721 | 3.68597E-05 | 0.017632215 |
| 478.399994 | 950.937342  | 2.14613E-05 | 0.010267101 |
| 478.439994 | 591.109459  | 1.33405E-05 | 0.006382637 |
| 478.479994 | 429.794398  | 9.69986E-06 | 0.004641189 |
| 478.519994 | 435.509179  | 9.82884E-06 | 0.004703294 |
| 478.559994 | 523.148247  | 1.18067E-05 | 0.005650227 |
| 478.599994 | 608.202966  | 1.37263E-05 | 0.006569404 |
| 478.639994 | 711.061206  | 1.60477E-05 | 0.007681052 |
| 478.679994 | 777.88542   | 1.75558E-05 | 0.008403606 |
| 478.719994 | 795.68145   | 1.79574E-05 | 0.008596577 |
| 478.759994 | 813.742622  | 1.8365E-05  | 0.008792445 |
| 478.799994 | 945.074377  | 2.1329E-05  | 0.010212331 |
| 478.839994 | 1349.251761 | 3.04507E-05 | 0.014581029 |
| 478.879994 | 2262.507794 | 5.10616E-05 | 0.024452402 |
| 478.919994 | 4280.192063 | 9.6598E-05  | 0.046262701 |
| 478.959994 | 8363.386784 | 0.00018875  | 0.090403694 |
| 478.999994 | 14674.40783 | 0.000331181 | 0.158635671 |
| 479.039994 | 21682.76803 | 0.00048935  | 0.23441816  |
| 479.079994 | 26844.29157 | 0.000605838 | 0.290244995 |
| 479.119994 | 27532.89821 | 0.000621379 | 0.297715181 |
| 479.159994 | 23797.61509 | 0.000537079 | 0.257346783 |
| 479.199994 | 18116.07955 | 0.000408855 | 0.195923161 |
| 479.239994 | 12487.52726 | 0.000281826 | 0.135062337 |
| 479.279994 | 7926.881551 | 0.000178899 | 0.085742556 |
| 479.319994 | 4713.430788 | 0.000106376 | 0.050987936 |
| 479.359994 | 2684.84358  | 6.05932E-05 | 0.029045946 |

|            |             |             |             |
|------------|-------------|-------------|-------------|
| 479.399994 | 1467.459155 | 3.31185E-05 | 0.015877013 |
| 479.439994 | 800.477946  | 1.80657E-05 | 0.008661406 |
| 479.479994 | 492.546545  | 1.11161E-05 | 0.005329943 |
| 479.519994 | 393.719992  | 8.88571E-06 | 0.004260876 |
| 479.559994 | 418.641564  | 9.44816E-06 | 0.004530958 |
| 479.599994 | 493.669292  | 1.11414E-05 | 0.005343429 |
| 479.639994 | 560.045002  | 1.26394E-05 | 0.006062379 |
| 479.679994 | 563.259403  | 1.2712E-05  | 0.006097683 |
| 479.719994 | 499.151789  | 1.12652E-05 | 0.005404123 |
| 479.759994 | 386.592518  | 8.72485E-06 | 0.004185836 |
| 479.799994 | 355.86029   | 8.03127E-06 | 0.003853404 |
| 479.839994 | 422.436905  | 9.53381E-06 | 0.004574705 |
| 479.879994 | 590.060053  | 1.33168E-05 | 0.006390482 |
| 479.919994 | 1034.528032 | 2.33479E-05 | 0.011205103 |
| 479.959994 | 2022.596646 | 4.56472E-05 | 0.021908825 |
| 479.999994 | 3714.323666 | 8.38271E-05 | 0.040237013 |
| 480.039994 | 5871.775028 | 0.000132518 | 0.063613836 |
| 480.079994 | 7777.875697 | 0.000175536 | 0.084271236 |
| 480.119994 | 8643.894892 | 0.000195081 | 0.093662129 |
| 480.159994 | 8222.968618 | 0.000185581 | 0.089108547 |
| 480.199994 | 7029.910164 | 0.000158655 | 0.076186265 |
| 480.239994 | 5512.36613  | 0.000124406 | 0.059744941 |
| 480.279994 | 4001.156696 | 9.03005E-05 | 0.04336954  |
| 480.319994 | 2681.719417 | 6.05227E-05 | 0.029070249 |
| 480.359994 | 1639.769433 | 3.70073E-05 | 0.017776832 |
| 480.399994 | 900.782404  | 2.03294E-05 | 0.009766246 |
| 480.439994 | 517.967402  | 1.16898E-05 | 0.005616249 |
| 480.479994 | 402.131685  | 9.07555E-06 | 0.004360621 |
| 480.519994 | 421.864817  | 9.5209E-06  | 0.004574983 |
| 480.559994 | 474.441903  | 1.07075E-05 | 0.005145593 |
| 480.599994 | 549.617301  | 1.24041E-05 | 0.005961409 |
| 480.639994 | 621.317502  | 1.40223E-05 | 0.006739664 |
| 480.679994 | 660.919296  | 1.4916E-05  | 0.007169836 |
| 480.719994 | 700.587031  | 1.58113E-05 | 0.007600795 |
| 480.759994 | 741.861015  | 1.67428E-05 | 0.008049254 |
| 480.799994 | 822.556368  | 1.8564E-05  | 0.008925548 |
| 480.839994 | 1016.714173 | 2.29458E-05 | 0.011033269 |
| 480.879994 | 1501.743371 | 3.38923E-05 | 0.016298108 |
| 480.919994 | 2779.55594  | 6.27307E-05 | 0.030168451 |
| 480.959994 | 5373.047191 | 0.000121262 | 0.058322263 |
| 480.999994 | 9353.127458 | 0.000211087 | 0.101532874 |
| 481.039994 | 14215.31405 | 0.00032082  | 0.154327173 |
| 481.079994 | 18470.9212  | 0.000416863 | 0.200544432 |
| 481.119994 | 20347.58933 | 0.000459217 | 0.22093836  |
| 481.159994 | 19189.71161 | 0.000433085 | 0.208383206 |
| 481.199994 | 15976.20903 | 0.000360561 | 0.173501847 |

|            |             |             |             |
|------------|-------------|-------------|-------------|
| 481.239994 | 12433.71485 | 0.000280612 | 0.135041537 |
| 481.279994 | 9195.432023 | 0.000207528 | 0.099879119 |
| 481.319994 | 6393.084397 | 0.000144283 | 0.069446298 |
| 481.359994 | 4057.603486 | 9.15745E-05 | 0.044080281 |
| 481.399994 | 2287.255464 | 5.16202E-05 | 0.024849949 |
| 481.439994 | 1218.859872 | 2.7508E-05  | 0.013243437 |
| 481.479994 | 683.426301  | 1.5424E-05  | 0.007426338 |
| 481.519994 | 508.50634   | 1.14763E-05 | 0.005526058 |
| 481.559994 | 500.890694  | 1.13044E-05 | 0.005443749 |
| 481.599994 | 499.818478  | 1.12802E-05 | 0.005432548 |
| 481.639994 | 524.906655  | 1.18464E-05 | 0.005705706 |
| 481.679994 | 531.430789  | 1.19937E-05 | 0.005777103 |
| 481.719994 | 504.566743  | 1.13874E-05 | 0.005485523 |
| 481.759994 | 442.706871  | 9.99128E-06 | 0.004813398 |
| 481.799994 | 399.108958  | 9.00733E-06 | 0.004339733 |
| 481.839994 | 407.11865   | 9.1881E-06  | 0.004427194 |
| 481.879994 | 509.695938  | 1.15031E-05 | 0.005543127 |
| 481.919994 | 822.416746  | 1.85608E-05 | 0.008944821 |
| 481.959994 | 1597.372977 | 3.60505E-05 | 0.017374891 |
| 481.999994 | 2981.137458 | 6.72801E-05 | 0.032429017 |
| 482.039994 | 4775.884876 | 0.000107785 | 0.051956714 |
| 482.079994 | 6476.192038 | 0.000146159 | 0.070460153 |
| 482.119994 | 7325.627127 | 0.000165329 | 0.079708513 |
| 482.159994 | 7198.663387 | 0.000162464 | 0.078333548 |
| 482.199994 | 6413.090503 | 0.000144735 | 0.069790985 |
| 482.239994 | 5348.713097 | 0.000120713 | 0.058212639 |
| 482.279994 | 4157.627211 | 9.38319E-05 | 0.045253226 |
| 482.319994 | 2858.668452 | 6.45162E-05 | 0.031117436 |
| 482.359994 | 1732.689137 | 3.91044E-05 | 0.018862389 |
| 482.399994 | 985.297061  | 2.22368E-05 | 0.010727024 |
| 482.439994 | 591.511906  | 1.33496E-05 | 0.006440381 |
| 482.479994 | 441.207632  | 9.95744E-06 | 0.004804266 |
| 482.519994 | 431.374489  | 9.73552E-06 | 0.004697584 |
| 482.559994 | 505.191832  | 1.14015E-05 | 0.005501896 |
| 482.599994 | 596.124487  | 1.34537E-05 | 0.006492755 |
| 482.639994 | 621.498244  | 1.40263E-05 | 0.006769677 |
| 482.679994 | 590.860654  | 1.33349E-05 | 0.00643649  |
| 482.719994 | 525.005256  | 1.18486E-05 | 0.005719574 |
| 482.759994 | 436.166373  | 9.84367E-06 | 0.004752129 |
| 482.799994 | 367.255702  | 8.28845E-06 | 0.004001663 |
| 482.839994 | 339.386682  | 7.65948E-06 | 0.003698306 |
| 482.879994 | 379.163663  | 8.5572E-06  | 0.004132099 |
| 482.919994 | 585.56172   | 1.32153E-05 | 0.006381939 |
| 482.959994 | 1124.93278  | 2.53882E-05 | 0.012261468 |
| 482.999994 | 2027.024808 | 4.57471E-05 | 0.022095862 |
| 483.039994 | 3187.052871 | 7.19273E-05 | 0.034743784 |

|            |             |             |             |
|------------|-------------|-------------|-------------|
| 483.079994 | 4434.274327 | 0.000100075 | 0.048344421 |
| 483.119994 | 5450.508698 | 0.00012301  | 0.059428779 |
| 483.159994 | 5888.818273 | 0.000132902 | 0.064213135 |
| 483.199994 | 5636.216219 | 0.000127202 | 0.061463788 |
| 483.239994 | 4909.999977 | 0.000110812 | 0.053548723 |
| 483.279994 | 3875.680512 | 8.74687E-05 | 0.042271878 |
| 483.319994 | 2715.228526 | 6.12789E-05 | 0.02961733  |
| 483.359994 | 1661.49116  | 3.74975E-05 | 0.018124811 |
| 483.399994 | 908.9634    | 2.0514E-05  | 0.009916486 |
| 483.439994 | 520.878431  | 1.17555E-05 | 0.005683079 |
| 483.479994 | 386.884548  | 8.73145E-06 | 0.004221479 |
| 483.519994 | 397.201144  | 8.96428E-06 | 0.004334407 |
| 483.559994 | 455.840016  | 1.02877E-05 | 0.004974708 |
| 483.599994 | 508.205086  | 1.14695E-05 | 0.005546641 |
| 483.639994 | 526.132449  | 1.18741E-05 | 0.005742778 |
| 483.679994 | 483.907786  | 1.09211E-05 | 0.00528233  |
| 483.719994 | 442.094773  | 9.97746E-06 | 0.004826298 |
| 483.759994 | 436.884892  | 9.85988E-06 | 0.004769817 |
| 483.799994 | 421.281165  | 9.50773E-06 | 0.004599839 |
| 483.839994 | 364.880013  | 8.23483E-06 | 0.003984342 |
| 483.879994 | 323.697116  | 7.30539E-06 | 0.003534934 |
| 483.919994 | 371.148626  | 8.37631E-06 | 0.004053463 |
| 483.959994 | 590.225747  | 1.33206E-05 | 0.006446624 |
| 483.999994 | 1025.716728 | 2.3149E-05  | 0.011204115 |
| 484.039994 | 1711.16506  | 3.86186E-05 | 0.018692953 |
| 484.079994 | 2532.351173 | 5.71516E-05 | 0.027665965 |
| 484.119994 | 3193.057943 | 7.20629E-05 | 0.034887076 |
| 484.159994 | 3610.057564 | 8.1474E-05  | 0.039446437 |
| 484.199994 | 3760.39123  | 8.48668E-05 | 0.0410925   |
| 484.239994 | 3482.946591 | 7.86053E-05 | 0.038063807 |
| 484.279994 | 2830.851242 | 6.38884E-05 | 0.030939859 |
| 484.319994 | 2067.302964 | 4.66561E-05 | 0.022596506 |
| 484.359994 | 1332.482959 | 3.00723E-05 | 0.014565811 |
| 484.399994 | 779.92333   | 1.76018E-05 | 0.008526304 |
| 484.439994 | 487.187653  | 1.09951E-05 | 0.005326489 |
| 484.479994 | 389.4       | 8.78822E-06 | 0.004257715 |
| 484.519994 | 397.339172  | 8.96739E-06 | 0.004344881 |
| 484.559994 | 446.903989  | 1.0086E-05  | 0.004887272 |
| 484.599994 | 495.447535  | 1.11816E-05 | 0.005418584 |
| 484.639994 | 556.520102  | 1.25599E-05 | 0.006087022 |
| 484.679994 | 544.324055  | 1.22846E-05 | 0.005954117 |
| 484.719994 | 442.672175  | 9.99049E-06 | 0.004842592 |
| 484.759994 | 370.916124  | 8.37106E-06 | 0.004057955 |
| 484.799994 | 357.189113  | 8.06126E-06 | 0.003908099 |
| 484.839994 | 345.902764  | 7.80654E-06 | 0.003784925 |
| 484.879994 | 399.001075  | 9.0049E-06  | 0.004366295 |

|            |             |             |             |
|------------|-------------|-------------|-------------|
| 484.919994 | 610.533952  | 1.37789E-05 | 0.006681665 |
| 484.959994 | 1185.158098 | 2.67474E-05 | 0.012971403 |
| 484.999994 | 2183.685954 | 4.92828E-05 | 0.023902134 |
| 485.039994 | 3515.204591 | 7.93333E-05 | 0.038479809 |
| 485.079994 | 4888.287696 | 0.000110322 | 0.05351492  |
| 485.119994 | 5789.754265 | 0.000130667 | 0.063389024 |
| 485.159994 | 6167.254591 | 0.000139186 | 0.067527647 |
| 485.199994 | 6039.204133 | 0.000136296 | 0.066131025 |
| 485.239994 | 5299.142245 | 0.000119594 | 0.058031918 |
| 485.279994 | 4296.53312  | 9.69668E-05 | 0.047056033 |
| 485.319994 | 3212.202148 | 7.24949E-05 | 0.035183238 |
| 485.359994 | 2198.975426 | 4.96278E-05 | 0.024087355 |
| 485.399994 | 1396.905197 | 3.15262E-05 | 0.01530282  |
| 485.439994 | 817.816315  | 1.8457E-05  | 0.008959754 |
| 485.479994 | 488.950864  | 1.10349E-05 | 0.005357243 |
| 485.519994 | 355.459374  | 8.02222E-06 | 0.00389495  |
| 485.559994 | 374.413848  | 8.45E-06    | 0.004102981 |
| 485.599994 | 462.884246  | 1.04467E-05 | 0.005072894 |
| 485.639994 | 514.495396  | 1.16114E-05 | 0.005638982 |
| 485.679994 | 507.540903  | 1.14545E-05 | 0.005563217 |
| 485.719994 | 452.374373  | 1.02095E-05 | 0.004958939 |
| 485.759994 | 363.2572    | 8.19821E-06 | 0.003982362 |
| 485.799994 | 296.093568  | 6.68242E-06 | 0.003246319 |
| 485.839994 | 272.931639  | 6.15969E-06 | 0.002992622 |
| 485.879994 | 295.812647  | 6.67608E-06 | 0.003243773 |
| 485.919994 | 380.773574  | 8.59353E-06 | 0.004175768 |
| 485.959994 | 585.919309  | 1.32234E-05 | 0.006426035 |
| 485.999994 | 954.523143  | 2.15423E-05 | 0.010469537 |
| 486.039994 | 1596.620014 | 3.60335E-05 | 0.017513717 |
| 486.079994 | 2410.073081 | 5.4392E-05  | 0.026438859 |
| 486.119994 | 3178.784177 | 7.17407E-05 | 0.034874604 |
| 486.159994 | 3732.430798 | 8.42358E-05 | 0.040952059 |
| 486.199994 | 3925.08507  | 8.85837E-05 | 0.043069396 |
| 486.239994 | 3712.096912 | 8.37769E-05 | 0.040735658 |
| 486.279994 | 3110.205443 | 7.0193E-05  | 0.034133454 |
| 486.319994 | 2298.90598  | 5.18831E-05 | 0.025231792 |
| 486.359994 | 1522.760931 | 3.43666E-05 | 0.016714536 |
| 486.399994 | 939.744902  | 2.12087E-05 | 0.010315928 |
| 486.439994 | 590.770524  | 1.33329E-05 | 0.00648564  |
| 486.479994 | 442.189799  | 9.97961E-06 | 0.00485488  |
| 486.519994 | 430.804691  | 9.72266E-06 | 0.004730269 |
| 486.559994 | 493.706274  | 1.11423E-05 | 0.005421379 |
| 486.599994 | 551.293625  | 1.24419E-05 | 0.006054243 |
| 486.639994 | 542.951056  | 1.22536E-05 | 0.005963116 |
| 486.679994 | 511.343632  | 1.15403E-05 | 0.00561644  |
| 486.719994 | 473.911881  | 1.06955E-05 | 0.005205729 |



|            |             |             |             |
|------------|-------------|-------------|-------------|
| 486.759994 | 443.457217  | 1.00082E-05 | 0.004871597 |
| 486.799994 | 456.182549  | 1.02954E-05 | 0.005011803 |
| 486.839994 | 529.454267  | 1.1949E-05  | 0.005817273 |
| 486.879994 | 747.392969  | 1.68676E-05 | 0.008212506 |
| 486.919994 | 1231.028621 | 2.77826E-05 | 0.013527904 |
| 486.959994 | 2156.624635 | 4.8672E-05  | 0.023701324 |
| 486.999994 | 3713.379102 | 8.38058E-05 | 0.040813421 |
| 487.039994 | 5690.893476 | 0.000128436 | 0.062553244 |
| 487.079994 | 7539.75785  | 0.000170162 | 0.082882424 |
| 487.119994 | 8684.181807 | 0.00019599  | 0.095470593 |
| 487.159994 | 8751.543945 | 0.00019751  | 0.096219047 |
| 487.199994 | 7885.816095 | 0.000177972 | 0.086707901 |
| 487.239994 | 6615.025423 | 0.000149292 | 0.072740989 |
| 487.279994 | 5183.995616 | 0.000116996 | 0.057009596 |
| 487.319994 | 3817.460265 | 8.61548E-05 | 0.041984938 |
| 487.359994 | 2660.89594  | 6.00527E-05 | 0.029267291 |
| 487.399994 | 1757.464739 | 3.96635E-05 | 0.019332005 |
| 487.439994 | 1103.495995 | 2.49044E-05 | 0.012139385 |
| 487.479994 | 690.704571  | 1.55882E-05 | 0.007598955 |
| 487.519994 | 487.346753  | 1.09987E-05 | 0.005362104 |
| 487.559994 | 451.093412  | 1.01805E-05 | 0.004963629 |
| 487.599994 | 502.756869  | 1.13465E-05 | 0.005532564 |
| 487.639994 | 540.313093  | 1.21941E-05 | 0.005946338 |
| 487.679994 | 527.843188  | 1.19127E-05 | 0.005809578 |
| 487.719994 | 525.337671  | 1.18561E-05 | 0.005782476 |
| 487.759994 | 514.903675  | 1.16207E-05 | 0.005668092 |
| 487.799994 | 498.180241  | 1.12432E-05 | 0.00548445  |
| 487.839994 | 499.680556  | 1.12771E-05 | 0.005501418 |
| 487.879994 | 503.022014  | 1.13525E-05 | 0.005538661 |
| 487.919994 | 574.856807  | 1.29737E-05 | 0.006330136 |
| 487.959994 | 827.696243  | 1.868E-05   | 0.009115069 |
| 487.999994 | 1377.521226 | 3.10887E-05 | 0.015171303 |
| 488.039994 | 2217.54612  | 5.00469E-05 | 0.024424902 |
| 488.079994 | 3177.830196 | 7.17192E-05 | 0.035004707 |
| 488.119994 | 4151.407316 | 9.36915E-05 | 0.045732685 |
| 488.159994 | 4911.89731  | 0.000110855 | 0.05411482  |
| 488.199994 | 5141.442629 | 0.000116035 | 0.056648383 |
| 488.239994 | 4790.439151 | 0.000108114 | 0.052785354 |
| 488.279994 | 4065.902367 | 9.17618E-05 | 0.044805428 |
| 488.319994 | 3108.503749 | 7.01546E-05 | 0.034257894 |
| 488.359994 | 2094.322067 | 4.72659E-05 | 0.02308279  |
| 488.399994 | 1257.904774 | 2.83892E-05 | 0.013865265 |
| 488.439994 | 746.706132  | 1.68521E-05 | 0.008231248 |
| 488.479994 | 510.229652  | 1.15152E-05 | 0.005624931 |
| 488.519994 | 435.494938  | 9.82851E-06 | 0.004801426 |
| 488.559994 | 420.928853  | 9.49978E-06 | 0.004641211 |

|            |             |             |             |
|------------|-------------|-------------|-------------|
| 488.599994 | 455.128896  | 1.02716E-05 | 0.005018716 |
| 488.639994 | 516.789769  | 1.16632E-05 | 0.005699118 |
| 488.679994 | 517.319925  | 1.16752E-05 | 0.005705432 |
| 488.719994 | 478.575855  | 1.08008E-05 | 0.005278562 |
| 488.759994 | 432.430409  | 9.75935E-06 | 0.004769981 |
| 488.799994 | 381.714076  | 8.61476E-06 | 0.004210892 |
| 488.839994 | 388.299977  | 8.76339E-06 | 0.004283895 |
| 488.879994 | 480.224926  | 1.0838E-05  | 0.005298485 |
| 488.919994 | 689.021667  | 1.55503E-05 | 0.007602833 |
| 488.959994 | 1072.331661 | 2.4201E-05  | 0.011833336 |
| 488.999994 | 1764.883897 | 3.9831E-05  | 0.019477345 |
| 489.039994 | 2866.709264 | 6.46976E-05 | 0.031639731 |
| 489.079994 | 4233.397859 | 9.55419E-05 | 0.046727628 |
| 489.119994 | 5380.60294  | 0.000121433 | 0.059395168 |
| 489.159994 | 6169.583878 | 0.000139239 | 0.068110107 |
| 489.199994 | 6451.608526 | 0.000145604 | 0.071229387 |
| 489.239994 | 6143.313735 | 0.000138646 | 0.067831185 |
| 489.279994 | 5360.778746 | 0.000120985 | 0.059195691 |
| 489.319994 | 4169.050436 | 9.40897E-05 | 0.046039953 |
| 489.359994 | 2964.088925 | 6.68954E-05 | 0.032735912 |
| 489.399994 | 1934.921443 | 4.36685E-05 | 0.021371355 |
| 489.439994 | 1163.470453 | 2.62579E-05 | 0.01285167  |
| 489.479994 | 701.443711  | 1.58306E-05 | 0.007748766 |
| 489.519994 | 502.169381  | 1.13333E-05 | 0.005547859 |
| 489.559994 | 488.033191  | 1.10142E-05 | 0.005392126 |
| 489.599994 | 509.068464  | 1.1489E-05  | 0.005624998 |
| 489.639994 | 523.127067  | 1.18062E-05 | 0.005780812 |
| 489.679994 | 522.792785  | 1.17987E-05 | 0.00577759  |
| 489.719994 | 500.1918    | 1.12886E-05 | 0.005528269 |
| 489.759994 | 438.98133   | 9.9072E-06  | 0.004852149 |
| 489.799994 | 397.612075  | 8.97355E-06 | 0.004395245 |
| 489.839994 | 385.78155   | 8.70655E-06 | 0.004264817 |
| 489.879994 | 368.777605  | 8.3228E-06  | 0.004077172 |
| 489.919994 | 426.286882  | 9.6207E-06  | 0.004713374 |
| 489.959994 | 580.338044  | 1.30974E-05 | 0.006417212 |
| 489.999994 | 939.677949  | 2.12072E-05 | 0.010391539 |
| 490.039994 | 1584.07868  | 3.57504E-05 | 0.01751915  |
| 490.079994 | 2432.051973 | 5.4888E-05  | 0.026899523 |
| 490.119994 | 3243.279792 | 7.31963E-05 | 0.035874974 |
| 490.159994 | 3932.080393 | 8.87416E-05 | 0.043497571 |
| 490.199994 | 4395.033265 | 9.91898E-05 | 0.048622829 |
| 490.239994 | 4361.917329 | 9.84424E-05 | 0.048260401 |
| 490.279994 | 3890.520094 | 8.78036E-05 | 0.043048358 |
| 490.319994 | 3135.101387 | 7.07549E-05 | 0.034692528 |
| 490.359994 | 2273.653778 | 5.13132E-05 | 0.02516194  |
| 490.399994 | 1465.006064 | 3.30631E-05 | 0.016214167 |

|            |             |             |             |
|------------|-------------|-------------|-------------|
| 490.439994 | 871.32196   | 1.96645E-05 | 0.009644269 |
| 490.479994 | 550.25307   | 1.24184E-05 | 0.006090999 |
| 490.519994 | 438.265833  | 9.89105E-06 | 0.004851757 |
| 490.559994 | 432.055867  | 9.7509E-06  | 0.004783401 |
| 490.599994 | 467.547951  | 1.05519E-05 | 0.005176765 |
| 490.639994 | 477.327824  | 1.07726E-05 | 0.00528548  |
| 490.679994 | 466.916839  | 1.05377E-05 | 0.00517062  |
| 490.719994 | 439.500565  | 9.91892E-06 | 0.00486741  |
| 490.759994 | 386.663247  | 8.72645E-06 | 0.004282593 |
| 490.799994 | 359.73146   | 8.11864E-06 | 0.003984627 |
| 490.839993 | 384.696034  | 8.68205E-06 | 0.004261499 |
| 490.879993 | 450.294778  | 1.01625E-05 | 0.004988581 |
| 490.919993 | 650.509861  | 1.46811E-05 | 0.007207246 |
| 490.959993 | 1222.691808 | 2.75945E-05 | 0.013547771 |
| 490.999993 | 2284.935023 | 5.15678E-05 | 0.02531979  |
| 491.039993 | 3776.731225 | 8.52356E-05 | 0.04185407  |
| 491.079993 | 5335.025867 | 0.000120404 | 0.059128046 |
| 491.119993 | 6576.559479 | 0.000148424 | 0.072893889 |
| 491.159993 | 7312.197412 | 0.000165026 | 0.081054223 |
| 491.199993 | 7404.440718 | 0.000167108 | 0.082083406 |
| 491.239993 | 6785.034795 | 0.000153129 | 0.075222983 |
| 491.279993 | 5610.579458 | 0.000126623 | 0.062207329 |
| 491.319993 | 4126.670336 | 9.31332E-05 | 0.045758204 |
| 491.359993 | 2692.896486 | 6.07749E-05 | 0.029862366 |
| 491.399993 | 1567.655073 | 3.53798E-05 | 0.017385629 |
| 491.439993 | 856.45314   | 1.9329E-05  | 0.009499021 |
| 491.479993 | 496.192151  | 1.11984E-05 | 0.005503773 |
| 491.519993 | 384.507973  | 8.67781E-06 | 0.004265317 |
| 491.559993 | 417.184146  | 9.41527E-06 | 0.004628168 |
| 491.599993 | 517.815788  | 1.16864E-05 | 0.005745025 |
| 491.639993 | 610.050394  | 1.3768E-05  | 0.006768893 |
| 491.679993 | 665.433545  | 1.50179E-05 | 0.007384005 |
| 491.719993 | 661.999513  | 1.49404E-05 | 0.007346497 |
| 491.759993 | 618.098583  | 1.39496E-05 | 0.006859867 |
| 491.799993 | 548.203483  | 1.23722E-05 | 0.006084642 |
| 491.839993 | 433.161985  | 9.77586E-06 | 0.00480816  |
| 491.879993 | 355.284446  | 8.01828E-06 | 0.003944029 |
| 491.919993 | 393.025392  | 8.87004E-06 | 0.004363348 |
| 491.959993 | 579.994102  | 1.30897E-05 | 0.006439589 |
| 491.999993 | 980.814278  | 2.21356E-05 | 0.010890721 |
| 492.039993 | 1672.564765 | 3.77475E-05 | 0.018573259 |
| 492.079993 | 2514.634264 | 5.67518E-05 | 0.027926422 |
| 492.119993 | 3353.829913 | 7.56913E-05 | 0.037249187 |
| 492.159993 | 3932.114406 | 8.87423E-05 | 0.043675432 |
| 492.199993 | 4060.231873 | 9.16338E-05 | 0.045102145 |
| 492.239993 | 3733.607767 | 8.42623E-05 | 0.041477287 |

|            |             |             |             |
|------------|-------------|-------------|-------------|
| 492.279993 | 3065.418633 | 6.91822E-05 | 0.034057027 |
| 492.319993 | 2290.820213 | 5.17006E-05 | 0.02545325  |
| 492.359993 | 1551.885375 | 3.50239E-05 | 0.017244363 |
| 492.399993 | 931.009003  | 2.10116E-05 | 0.0103461   |
| 492.439993 | 530.66791   | 1.19764E-05 | 0.005897676 |
| 492.479993 | 353.221187  | 7.97171E-06 | 0.003925908 |
| 492.519993 | 344.323941  | 7.77091E-06 | 0.003827329 |
| 492.559993 | 431.157956  | 9.73063E-06 | 0.004792921 |
| 492.599993 | 532.230512  | 1.20117E-05 | 0.005916964 |
| 492.639993 | 581.870803  | 1.3132E-05  | 0.006469355 |
| 492.679993 | 598.941411  | 1.35173E-05 | 0.00665969  |
| 492.719993 | 586.036911  | 1.3226E-05  | 0.006516733 |
| 492.759993 | 527.889203  | 1.19137E-05 | 0.005870607 |
| 492.799993 | 507.619306  | 1.14563E-05 | 0.005645645 |
| 492.839993 | 525.089236  | 1.18505E-05 | 0.005840416 |
| 492.879993 | 604.223428  | 1.36365E-05 | 0.006721149 |
| 492.919993 | 845.140407  | 1.90736E-05 | 0.009401779 |
| 492.959993 | 1438.970273 | 3.24756E-05 | 0.016009149 |
| 492.999993 | 2581.667236 | 5.82646E-05 | 0.028724464 |
| 493.039993 | 4197.805273 | 9.47386E-05 | 0.046709928 |
| 493.079993 | 5967.983145 | 0.000134689 | 0.066412484 |
| 493.119993 | 7257.974079 | 0.000163802 | 0.080774221 |
| 493.159993 | 7617.309742 | 0.000171912 | 0.084780156 |
| 493.199993 | 7236.930694 | 0.000163327 | 0.080553095 |
| 493.239993 | 6283.648993 | 0.000141813 | 0.069947944 |
| 493.279993 | 4975.045203 | 0.00011228  | 0.055385399 |
| 493.319993 | 3619.452265 | 8.1686E-05  | 0.040297335 |
| 493.359993 | 2363.938279 | 5.33508E-05 | 0.026321147 |
| 493.399993 | 1375.047101 | 3.10329E-05 | 0.015311632 |
| 493.439993 | 758.005576  | 1.71071E-05 | 0.008441342 |
| 493.479993 | 461.609583  | 1.04179E-05 | 0.005141018 |
| 493.519993 | 376.949143  | 8.50722E-06 | 0.004198482 |
| 493.559993 | 394.819342  | 8.91052E-06 | 0.004397877 |
| 493.599993 | 459.009352  | 1.03592E-05 | 0.005113302 |
| 493.639993 | 512.618308  | 1.15691E-05 | 0.005710961 |
| 493.679993 | 499.502889  | 1.12731E-05 | 0.005565296 |
| 493.719993 | 414.621583  | 9.35743E-06 | 0.004619951 |
| 493.759993 | 366.973564  | 8.28208E-06 | 0.004089361 |
| 493.799993 | 335.504388  | 7.57187E-06 | 0.003738988 |
| 493.839993 | 290.263021  | 6.55083E-06 | 0.003235063 |
| 493.879993 | 300.271732  | 6.77671E-06 | 0.003346884 |
| 493.919993 | 407.239983  | 9.19084E-06 | 0.004539539 |
| 493.959993 | 637.271789  | 1.43823E-05 | 0.007104299 |
| 493.999993 | 1118.165669 | 2.52354E-05 | 0.012466308 |
| 494.039993 | 1858.1015   | 4.19348E-05 | 0.02071745  |
| 494.079993 | 2731.635544 | 6.16492E-05 | 0.030459641 |

|            |             |             |             |
|------------|-------------|-------------|-------------|
| 494.119993 | 3553.95695  | 8.02079E-05 | 0.039632306 |
| 494.159993 | 4090.298456 | 9.23123E-05 | 0.045617065 |
| 494.199993 | 4289.265545 | 9.68027E-05 | 0.047839918 |
| 494.239993 | 4112.623704 | 9.28162E-05 | 0.045873472 |
| 494.279993 | 3544.999641 | 8.00057E-05 | 0.039545219 |
| 494.319993 | 2661.987797 | 6.00774E-05 | 0.029697439 |
| 494.359993 | 1747.567896 | 3.94402E-05 | 0.019497644 |
| 494.399993 | 1048.854883 | 2.36712E-05 | 0.011703038 |
| 494.439993 | 635.250352  | 1.43367E-05 | 0.007088646 |
| 494.479993 | 423.322353  | 9.5538E-06  | 0.004724161 |
| 494.519993 | 361.909802  | 8.1678E-06  | 0.00403914  |
| 494.559993 | 390.947103  | 8.82313E-06 | 0.004363568 |
| 494.599993 | 438.701937  | 9.90089E-06 | 0.004896981 |
| 494.639993 | 493.675917  | 1.11416E-05 | 0.00551107  |
| 494.679993 | 558.557218  | 1.26059E-05 | 0.006235866 |
| 494.719993 | 610.088415  | 1.37688E-05 | 0.006811723 |
| 494.759993 | 611.850982  | 1.38086E-05 | 0.006831955 |
| 494.799993 | 601.638035  | 1.35781E-05 | 0.00671846  |
| 494.839993 | 585.61362   | 1.32165E-05 | 0.006540045 |
| 494.879993 | 647.30212   | 1.46087E-05 | 0.007229557 |
| 494.919993 | 959.090437  | 2.16453E-05 | 0.010712709 |
| 494.959993 | 1737.607483 | 3.92154E-05 | 0.019410045 |
| 494.999993 | 3081.027824 | 6.95345E-05 | 0.03441958  |
| 495.039993 | 4864.568891 | 0.000109787 | 0.05434873  |
| 495.079993 | 6547.968899 | 0.000147779 | 0.073162197 |
| 495.119993 | 7567.367715 | 0.000170785 | 0.084559043 |
| 495.159993 | 7747.841733 | 0.000174858 | 0.086582684 |
| 495.199993 | 7176.876003 | 0.000161972 | 0.08020858  |
| 495.239993 | 6105.786653 | 0.000137799 | 0.068243625 |
| 495.279993 | 4716.011208 | 0.000106434 | 0.052714534 |
| 495.319993 | 3257.5062   | 7.35174E-05 | 0.036414627 |
| 495.359993 | 2047.00603  | 4.61981E-05 | 0.022884678 |
| 495.399993 | 1169.887795 | 2.64027E-05 | 0.013079916 |
| 495.439993 | 644.89385   | 1.45544E-05 | 0.00721081  |
| 495.479993 | 418.506048  | 9.4451E-06  | 0.004679857 |
| 495.519993 | 374.495908  | 8.45185E-06 | 0.004188061 |
| 495.559993 | 419.690068  | 9.47182E-06 | 0.004693855 |
| 495.599993 | 474.834137  | 1.07163E-05 | 0.005311021 |
| 495.639993 | 500.804803  | 1.13025E-05 | 0.005601955 |
| 495.679993 | 473.105722  | 1.06773E-05 | 0.005292542 |
| 495.719993 | 421.504696  | 9.51277E-06 | 0.004715672 |
| 495.759993 | 382.67016   | 8.63633E-06 | 0.004281548 |
| 495.799993 | 345.15813   | 7.78974E-06 | 0.003862152 |
| 495.839993 | 296.506013  | 6.69173E-06 | 0.003318026 |
| 495.879993 | 283.926751  | 6.40783E-06 | 0.003177515 |
| 495.919993 | 372.606817  | 8.40922E-06 | 0.004170299 |

|            |             |             |             |
|------------|-------------|-------------|-------------|
| 495.959993 | 689.925088  | 1.55706E-05 | 0.007722419 |
| 495.999993 | 1251.884059 | 2.82533E-05 | 0.014013626 |
| 496.039993 | 2042.896262 | 4.61053E-05 | 0.022870084 |
| 496.079993 | 2950.223116 | 6.65824E-05 | 0.03303021  |
| 496.119993 | 3723.040577 | 8.40238E-05 | 0.041685907 |
| 496.159993 | 4233.538618 | 9.55451E-05 | 0.047405641 |
| 496.199993 | 4539.444    | 0.000102449 | 0.050835157 |
| 496.239993 | 4649.634223 | 0.000104936 | 0.052073325 |
| 496.279993 | 4587.396913 | 0.000103531 | 0.051380443 |
| 496.319993 | 4346.350285 | 9.80911E-05 | 0.04868456  |
| 496.359993 | 3854.109148 | 8.69819E-05 | 0.043174323 |
| 496.399993 | 3108.774865 | 7.01607E-05 | 0.03482778  |
| 496.439993 | 2233.10993  | 5.03982E-05 | 0.025019672 |
| 496.479993 | 1456.758918 | 3.2877E-05  | 0.016322783 |
| 496.519993 | 947.586192  | 2.13857E-05 | 0.010618428 |
| 496.559993 | 720.486229  | 1.62604E-05 | 0.00807425  |
| 496.599993 | 669.997226  | 1.51209E-05 | 0.007509041 |
| 496.639993 | 620.322942  | 1.39998E-05 | 0.006952873 |
| 496.679993 | 563.18285   | 1.27103E-05 | 0.006312928 |
| 496.719993 | 516.813449  | 1.16638E-05 | 0.005793623 |
| 496.759993 | 487.556526  | 1.10035E-05 | 0.005466085 |
| 496.799993 | 466.420184  | 1.05265E-05 | 0.005229542 |
| 496.839993 | 469.295733  | 1.05914E-05 | 0.005262207 |
| 496.879993 | 588.92625   | 1.32912E-05 | 0.006604154 |
| 496.919993 | 994.734091  | 2.24498E-05 | 0.011155736 |
| 496.959993 | 1993.73338  | 4.49958E-05 | 0.022361105 |
| 496.999993 | 3646.333973 | 8.22927E-05 | 0.040899461 |
| 497.039993 | 5640.175418 | 0.000127291 | 0.06326867  |
| 497.079993 | 7511.629111 | 0.000169527 | 0.084268483 |
| 497.119993 | 8671.887112 | 0.000195712 | 0.097292553 |
| 497.159993 | 8634.553984 | 0.00019487  | 0.096881496 |
| 497.199993 | 7675.778497 | 0.000173232 | 0.086130765 |
| 497.239993 | 6389.916139 | 0.000144212 | 0.071707729 |
| 497.279993 | 5020.571688 | 0.000113307 | 0.056345458 |
| 497.319993 | 3666.764705 | 8.27538E-05 | 0.041155105 |
| 497.359993 | 2541.534058 | 5.73589E-05 | 0.028528014 |
| 497.399993 | 1693.905925 | 3.82291E-05 | 0.019015153 |
| 497.439993 | 1094.547257 | 2.47024E-05 | 0.012287965 |
| 497.479993 | 720.874355  | 1.62691E-05 | 0.008093567 |
| 497.519993 | 544.24051   | 1.22828E-05 | 0.006110914 |
| 497.559993 | 526.857463  | 1.18904E-05 | 0.005916207 |
| 497.599993 | 570.450563  | 1.28743E-05 | 0.006406239 |
| 497.639993 | 546.085935  | 1.23244E-05 | 0.006133114 |
| 497.679993 | 486.997337  | 1.09909E-05 | 0.005469927 |
| 497.719993 | 412.764666  | 9.31552E-06 | 0.004636522 |
| 497.759993 | 348.533444  | 7.86591E-06 | 0.003915337 |

|            |             |             |             |
|------------|-------------|-------------|-------------|
| 497.799993 | 289.912088  | 6.54291E-06 | 0.003257062 |
| 497.839993 | 275.776237  | 6.22389E-06 | 0.003098499 |
| 497.879993 | 330.237     | 7.45299E-06 | 0.003710694 |
| 497.919993 | 482.982169  | 1.09002E-05 | 0.005427445 |
| 497.959993 | 832.074076  | 1.87788E-05 | 0.009351068 |
| 497.999993 | 1466.184436 | 3.30897E-05 | 0.016478691 |
| 498.039993 | 2409.189265 | 5.4372E-05  | 0.027079453 |
| 498.079993 | 3510.505281 | 7.92272E-05 | 0.03946149  |
| 498.119993 | 4570.119914 | 0.000103141 | 0.051376714 |
| 498.159993 | 5310.355671 | 0.000119847 | 0.059703145 |
| 498.199993 | 5614.467645 | 0.000126711 | 0.063127277 |
| 498.239993 | 5301.276643 | 0.000119642 | 0.059610643 |
| 498.279993 | 4502.3217   | 0.000101611 | 0.050630793 |
| 498.319993 | 3407.274288 | 7.68974E-05 | 0.038319529 |
| 498.359993 | 2292.087257 | 5.17292E-05 | 0.025779772 |
| 498.399993 | 1369.141802 | 3.08996E-05 | 0.015400372 |
| 498.439993 | 772.793334  | 1.74409E-05 | 0.008693227 |
| 498.479993 | 462.947926  | 1.04481E-05 | 0.005208164 |
| 498.519993 | 366.566454  | 8.27289E-06 | 0.004124203 |
| 498.559993 | 396.28224   | 8.94354E-06 | 0.00445889  |
| 498.599993 | 462.488513  | 1.04377E-05 | 0.005204248 |
| 498.639993 | 519.16255   | 1.17168E-05 | 0.005842453 |
| 498.679993 | 514.979025  | 1.16224E-05 | 0.005795838 |
| 498.719993 | 439.533895  | 9.91967E-06 | 0.004947137 |
| 498.759993 | 362.919462  | 8.19059E-06 | 0.004085137 |
| 498.799993 | 322.30537   | 7.27398E-06 | 0.003628263 |
| 498.839993 | 318.244029  | 7.18232E-06 | 0.003582831 |
| 498.879993 | 380.865361  | 8.5956E-06  | 0.004288173 |
| 498.919993 | 625.078942  | 1.41072E-05 | 0.007038345 |
| 498.959993 | 1227.218409 | 2.76966E-05 | 0.0138195   |
| 498.999993 | 2275.679876 | 5.13589E-05 | 0.025628103 |
| 499.039993 | 3780.739852 | 8.5326E-05  | 0.042581103 |
| 499.079993 | 5443.580492 | 0.000122854 | 0.061313988 |
| 499.119993 | 6637.113416 | 0.00014979  | 0.074763386 |
| 499.159993 | 6955.471577 | 0.000156975 | 0.078355792 |
| 499.199993 | 6580.457477 | 0.000148512 | 0.074137069 |
| 499.239993 | 5676.288242 | 0.000128106 | 0.063955598 |
| 499.279993 | 4324.585945 | 9.75999E-05 | 0.048729668 |
| 499.319993 | 2909.877117 | 6.56719E-05 | 0.032791279 |
| 499.359993 | 1784.730646 | 4.02789E-05 | 0.020113664 |
| 499.399993 | 1013.441546 | 2.2872E-05  | 0.011422259 |
| 499.439993 | 565.585973  | 1.27645E-05 | 0.006375096 |
| 499.479993 | 371.651135  | 8.38765E-06 | 0.004189463 |
| 499.519993 | 325.000879  | 7.33482E-06 | 0.003663888 |
| 499.559993 | 380.527455  | 8.58797E-06 | 0.004290209 |
| 499.599993 | 475.026164  | 1.07207E-05 | 0.005356051 |

|            |             |             |             |
|------------|-------------|-------------|-------------|
| 499.639993 | 562.870383  | 1.27032E-05 | 0.006347027 |
| 499.679993 | 598.338898  | 1.35037E-05 | 0.006747516 |
| 499.719993 | 594.397163  | 1.34147E-05 | 0.006703602 |
| 499.759993 | 541.973997  | 1.22316E-05 | 0.006112863 |
| 499.799993 | 444.439794  | 1.00304E-05 | 0.005013187 |
| 499.839993 | 358.682837  | 8.09497E-06 | 0.004046191 |
| 499.879993 | 352.959041  | 7.96579E-06 | 0.003981941 |
| 499.919993 | 432.103117  | 9.75197E-06 | 0.004875203 |
| 499.959993 | 646.83878   | 1.45983E-05 | 0.007298541 |
| 499.999993 | 1097.923131 | 2.47786E-05 | 0.012389298 |
| 500.039993 | 1863.520883 | 4.20571E-05 | 0.021030217 |
| 500.079993 | 2786.873738 | 6.28959E-05 | 0.03145296  |
| 500.119993 | 3605.3483   | 8.13677E-05 | 0.040693608 |
| 500.159993 | 4193.361322 | 9.46383E-05 | 0.047334304 |
| 500.199993 | 4296.980752 | 9.69769E-05 | 0.04850783  |
| 500.239993 | 3922.005554 | 8.85142E-05 | 0.044278344 |
| 500.279993 | 3321.083703 | 7.49522E-05 | 0.037497103 |
| 500.319993 | 2524.256566 | 5.6969E-05  | 0.028502707 |
| 500.359993 | 1688.030936 | 3.80965E-05 | 0.019061968 |
| 500.399993 | 993.828898  | 2.24293E-05 | 0.011223639 |
| 500.439993 | 552.334697  | 1.24654E-05 | 0.006238197 |
| 500.479993 | 389.615644  | 8.79308E-06 | 0.004400762 |
| 500.519993 | 396.665215  | 8.95218E-06 | 0.004480746 |
| 500.559993 | 454.916895  | 1.02668E-05 | 0.00513917  |
| 500.599993 | 505.965432  | 1.14189E-05 | 0.005716319 |
| 500.639993 | 516.926191  | 1.16663E-05 | 0.005840618 |
| 500.679993 | 482.850114  | 1.08973E-05 | 0.005456037 |
| 500.719993 | 447.863666  | 1.01077E-05 | 0.005061107 |
| 500.759993 | 419.25308   | 9.46196E-06 | 0.00473817  |
| 500.799993 | 368.929518  | 8.32623E-06 | 0.004169774 |
| 500.839993 | 380.254561  | 8.58182E-06 | 0.004298117 |
| 500.879993 | 551.849944  | 1.24545E-05 | 0.006238202 |
| 500.919993 | 985.294762  | 2.22367E-05 | 0.011138823 |
| 500.959993 | 1861.15953  | 4.20038E-05 | 0.021042212 |
| 500.999993 | 3132.186832 | 7.06891E-05 | 0.035415236 |
| 501.039993 | 4611.266667 | 0.00010407  | 0.052143165 |
| 501.079993 | 5854.785911 | 0.000132134 | 0.066209886 |
| 501.119993 | 6541.123932 | 0.000147624 | 0.073977366 |
| 501.159993 | 6558.540057 | 0.000148017 | 0.074180256 |
| 501.199993 | 5984.905594 | 0.000135071 | 0.067697576 |
| 501.239993 | 5051.992942 | 0.000114016 | 0.057149602 |
| 501.279993 | 3908.100247 | 8.82004E-05 | 0.044213085 |
| 501.319993 | 2832.684469 | 6.39297E-05 | 0.032049258 |
| 501.359993 | 1927.574121 | 4.35027E-05 | 0.021810495 |
| 501.399993 | 1210.087974 | 2.731E-05   | 0.013693234 |
| 501.439993 | 705.535766  | 1.5923E-05  | 0.007984409 |



|            |             |             |             |
|------------|-------------|-------------|-------------|
| 501.479993 | 454.572106  | 1.02591E-05 | 0.005144713 |
| 501.519993 | 372.819655  | 8.41402E-06 | 0.004219799 |
| 501.559993 | 359.362952  | 8.11032E-06 | 0.004067813 |
| 501.599993 | 400.891027  | 9.04755E-06 | 0.004538252 |
| 501.639993 | 470.560088  | 1.06199E-05 | 0.005327359 |
| 501.679993 | 481.764727  | 1.08728E-05 | 0.005454646 |
| 501.719993 | 463.538357  | 1.04614E-05 | 0.005248701 |
| 501.759993 | 416.356696  | 9.39659E-06 | 0.004714833 |
| 501.799993 | 342.56615   | 7.73124E-06 | 0.003879537 |
| 501.839993 | 280.545044  | 6.33151E-06 | 0.003177405 |
| 501.879993 | 275.438718  | 6.21627E-06 | 0.003119821 |
| 501.919993 | 369.277285  | 8.33407E-06 | 0.004183038 |
| 501.959993 | 626.993484  | 1.41504E-05 | 0.007102919 |
| 501.999993 | 1103.199041 | 2.48977E-05 | 0.012498628 |
| 502.039993 | 1763.298293 | 3.97952E-05 | 0.019978775 |
| 502.079993 | 2532.932809 | 5.71648E-05 | 0.028701285 |
| 502.119993 | 3187.727153 | 7.19426E-05 | 0.036123799 |
| 502.159993 | 3637.178615 | 8.20861E-05 | 0.041220333 |
| 502.199993 | 3823.784084 | 8.62975E-05 | 0.043338594 |
| 502.239993 | 3662.863401 | 8.26657E-05 | 0.041518033 |
| 502.279993 | 3172.78897  | 7.16054E-05 | 0.035965974 |
| 502.319993 | 2463.728607 | 5.56029E-05 | 0.02793046  |
| 502.359993 | 1689.584641 | 3.81316E-05 | 0.019155776 |
| 502.399993 | 1038.546436 | 2.34385E-05 | 0.011775526 |
| 502.439993 | 620.7209    | 1.40088E-05 | 0.007038584 |
| 502.479993 | 417.960695  | 9.43279E-06 | 0.004739789 |
| 502.519993 | 373.354318  | 8.42609E-06 | 0.004234277 |
| 502.559993 | 414.744912  | 9.36021E-06 | 0.00470407  |
| 502.599993 | 471.944324  | 1.06511E-05 | 0.005353256 |
| 502.639993 | 520.610916  | 1.17495E-05 | 0.00590575  |
| 502.679993 | 549.032083  | 1.23909E-05 | 0.006228652 |
| 502.719993 | 550.80042   | 1.24308E-05 | 0.006249211 |
| 502.759993 | 521.075051  | 1.17599E-05 | 0.005912426 |
| 502.799993 | 500.704131  | 1.13002E-05 | 0.005681738 |
| 502.839993 | 550.396814  | 1.24217E-05 | 0.006246122 |
| 502.879993 | 810.904248  | 1.8301E-05  | 0.009203196 |
| 502.919993 | 1558.804551 | 3.518E-05   | 0.017692749 |
| 502.959993 | 2953.715826 | 6.66613E-05 | 0.033527943 |
| 502.999993 | 4895.663571 | 0.000110488 | 0.055575618 |
| 503.039993 | 6967.85376  | 0.000157255 | 0.07910543  |
| 503.079993 | 8505.191828 | 0.00019195  | 0.096566372 |
| 503.119993 | 9214.449603 | 0.000207957 | 0.104627472 |
| 503.159993 | 9022.158108 | 0.000203618 | 0.102452201 |
| 503.199993 | 8276.636909 | 0.000186792 | 0.093993817 |
| 503.239993 | 7129.760017 | 0.000160909 | 0.08097572  |
| 503.279993 | 5728.993418 | 0.000129295 | 0.065071789 |

|            |             |             |             |
|------------|-------------|-------------|-------------|
| 503.319993 | 4274.220485 | 9.64632E-05 | 0.048551859 |
| 503.359993 | 2885.701376 | 6.51263E-05 | 0.032781954 |
| 503.399993 | 1744.133939 | 3.93627E-05 | 0.01981517  |
| 503.439993 | 988.173608  | 2.23017E-05 | 0.011227569 |
| 503.479993 | 615.009515  | 1.38799E-05 | 0.006988256 |
| 503.519993 | 470.48825   | 1.06183E-05 | 0.005346508 |
| 503.559993 | 477.064786  | 1.07667E-05 | 0.005421673 |
| 503.599993 | 525.905     | 1.18689E-05 | 0.0059772   |
| 503.639993 | 542.513073  | 1.22438E-05 | 0.006166449 |
| 503.679993 | 528.864277  | 1.19357E-05 | 0.006011788 |
| 503.719993 | 469.751756  | 1.06016E-05 | 0.005340259 |
| 503.759993 | 391.830869  | 8.84308E-06 | 0.004454788 |
| 503.799993 | 325.320759  | 7.34204E-06 | 0.003698918 |
| 503.839993 | 304.332622  | 6.86836E-06 | 0.003460556 |
| 503.879993 | 347.584302  | 7.84449E-06 | 0.003952683 |
| 503.919993 | 485.053311  | 1.0947E-05  | 0.005516401 |
| 503.959993 | 858.373168  | 1.93723E-05 | 0.009762858 |
| 503.999993 | 1556.10156  | 3.5119E-05  | 0.017699998 |
| 504.039993 | 2467.487613 | 5.56878E-05 | 0.028068857 |
| 504.079993 | 3420.699779 | 7.72004E-05 | 0.038915192 |
| 504.119993 | 4253.563575 | 9.5997E-05  | 0.04839401  |
| 504.159993 | 4749.129806 | 0.000107181 | 0.054036496 |
| 504.199993 | 4794.794964 | 0.000108212 | 0.054560411 |
| 504.239993 | 4447.048344 | 0.000100364 | 0.050607385 |
| 504.279993 | 3865.821537 | 8.72462E-05 | 0.043996517 |
| 504.319993 | 3002.2159   | 6.77558E-05 | 0.03417062  |
| 504.359993 | 2032.917763 | 4.58801E-05 | 0.023140098 |
| 504.399993 | 1232.225128 | 2.78096E-05 | 0.014027164 |
| 504.439993 | 720.549931  | 1.62618E-05 | 0.008203106 |
| 504.479993 | 460.156779  | 1.03851E-05 | 0.005239074 |
| 504.519993 | 395.519045  | 8.92631E-06 | 0.004503504 |
| 504.559993 | 441.61203   | 9.96657E-06 | 0.005028732 |
| 504.599993 | 504.320643  | 1.13818E-05 | 0.005743263 |
| 504.639993 | 549.095886  | 1.23923E-05 | 0.006253665 |
| 504.679993 | 544.57561   | 1.22903E-05 | 0.006202675 |
| 504.719993 | 496.116622  | 1.11967E-05 | 0.005651179 |
| 504.759993 | 454.719246  | 1.02624E-05 | 0.005180039 |
| 504.799993 | 434.736832  | 9.8114E-06  | 0.004952797 |
| 504.839993 | 440.442227  | 9.94017E-06 | 0.005018194 |
| 504.879993 | 527.266926  | 1.18997E-05 | 0.00600791  |
| 504.919993 | 792.068147  | 1.78759E-05 | 0.009025887 |
| 504.959993 | 1359.473231 | 3.06814E-05 | 0.015492888 |
| 504.999993 | 2360.500432 | 5.32732E-05 | 0.026902969 |
| 505.039993 | 3678.998232 | 8.30299E-05 | 0.041933403 |
| 505.079993 | 5051.690268 | 0.00011401  | 0.057583974 |
| 505.119993 | 6217.35533  | 0.000140317 | 0.070876947 |

|            |             |             |             |
|------------|-------------|-------------|-------------|
| 505.159993 | 6786.925119 | 0.000153171 | 0.077376087 |
| 505.199993 | 6591.769045 | 0.000148767 | 0.07515711  |
| 505.239993 | 5724.67555  | 0.000129198 | 0.065275973 |
| 505.279993 | 4566.893006 | 0.000103068 | 0.052078407 |
| 505.319993 | 3365.837284 | 7.59623E-05 | 0.038385248 |
| 505.359993 | 2270.330156 | 5.12382E-05 | 0.025893731 |
| 505.399993 | 1364.568314 | 3.07964E-05 | 0.015564503 |
| 505.439993 | 782.019399  | 1.76491E-05 | 0.008920555 |
| 505.479993 | 485.213254  | 1.09506E-05 | 0.005535303 |
| 505.519993 | 402.922157  | 9.09339E-06 | 0.004596891 |
| 505.559993 | 438.383003  | 9.89369E-06 | 0.005001856 |
| 505.599993 | 478.57348   | 1.08007E-05 | 0.005460852 |
| 505.639993 | 484.404663  | 1.09323E-05 | 0.005527828 |
| 505.679993 | 467.290001  | 1.05461E-05 | 0.005332944 |
| 505.719993 | 447.813845  | 1.01065E-05 | 0.005111077 |
| 505.759993 | 388.394369  | 8.76552E-06 | 0.004433249 |
| 505.799993 | 348.741952  | 7.87062E-06 | 0.00398096  |
| 505.839993 | 327.878015  | 7.39975E-06 | 0.00374309  |
| 505.879993 | 323.129485  | 7.29258E-06 | 0.003689172 |
| 505.919993 | 388.009588  | 8.75684E-06 | 0.004430258 |
| 505.959993 | 596.547506  | 1.34632E-05 | 0.006811864 |
| 505.999993 | 968.509857  | 2.18579E-05 | 0.011060107 |
| 506.039993 | 1574.510661 | 3.55345E-05 | 0.017981884 |
| 506.079993 | 2365.188252 | 5.3379E-05  | 0.027014046 |
| 506.119993 | 3101.684876 | 7.00007E-05 | 0.035428758 |
| 506.159993 | 3590.836891 | 8.10402E-05 | 0.0410193   |
| 506.199993 | 3714.350463 | 8.38277E-05 | 0.042433589 |
| 506.239993 | 3386.994389 | 7.64397E-05 | 0.038696856 |
| 506.279993 | 2785.0043   | 6.28537E-05 | 0.031821555 |
| 506.319993 | 2061.675147 | 4.65291E-05 | 0.023558632 |
| 506.359993 | 1381.80932  | 3.11855E-05 | 0.015791095 |
| 506.399993 | 854.958331  | 1.92952E-05 | 0.009771099 |
| 506.439993 | 500.588769  | 1.12976E-05 | 0.005721552 |
| 506.479993 | 341.419593  | 7.70536E-06 | 0.003902613 |
| 506.519993 | 346.318773  | 7.81593E-06 | 0.003958926 |
| 506.559993 | 436.588249  | 9.85319E-06 | 0.004991231 |
| 506.599993 | 542.862459  | 1.22516E-05 | 0.006206686 |
| 506.639993 | 572.800243  | 1.29273E-05 | 0.006549489 |
| 506.679993 | 530.345331  | 1.19692E-05 | 0.006064532 |
| 506.719993 | 506.469943  | 1.14303E-05 | 0.005791972 |
| 506.759993 | 473.964495  | 1.06967E-05 | 0.005420669 |
| 506.799993 | 467.443294  | 1.05495E-05 | 0.005346509 |
| 506.839993 | 479.360526  | 1.08185E-05 | 0.005483248 |
| 506.879993 | 513.103303  | 1.158E-05   | 0.005869684 |
| 506.919993 | 702.09714   | 1.58454E-05 | 0.008032327 |
| 506.959993 | 1268.37188  | 2.86254E-05 | 0.014511926 |

|            |             |             |             |
|------------|-------------|-------------|-------------|
| 506.999993 | 2283.694525 | 5.15398E-05 | 0.026130681 |
| 507.039993 | 3688.365523 | 8.32413E-05 | 0.042206654 |
| 507.079993 | 5313.961281 | 0.000119929 | 0.060813447 |
| 507.119993 | 6900.488356 | 0.000155734 | 0.078976033 |
| 507.159993 | 7939.289241 | 0.000179179 | 0.090872268 |
| 507.199993 | 8125.304538 | 0.000183377 | 0.093008715 |
| 507.239993 | 7466.550573 | 0.00016851  | 0.085474832 |
| 507.279993 | 6134.464305 | 0.000138446 | 0.070231046 |
| 507.319993 | 4505.624173 | 0.000101686 | 0.051587169 |
| 507.359993 | 2965.871504 | 6.69356E-05 | 0.03396044  |
| 507.399993 | 1749.52506  | 3.94843E-05 | 0.020034356 |
| 507.439993 | 965.860324  | 2.17981E-05 | 0.011061239 |
| 507.479993 | 562.183168  | 1.26877E-05 | 0.006438749 |
| 507.519993 | 443.326041  | 1.00053E-05 | 0.005077865 |
| 507.559993 | 534.22587   | 1.20567E-05 | 0.006119516 |
| 507.599993 | 669.033964  | 1.50992E-05 | 0.007664336 |
| 507.639993 | 744.427271  | 1.68007E-05 | 0.0085287   |
| 507.679993 | 711.461327  | 1.60567E-05 | 0.008151661 |
| 507.719993 | 607.2049    | 1.37038E-05 | 0.006957677 |
| 507.759993 | 488.346265  | 1.10213E-05 | 0.005596173 |
| 507.799993 | 397.039504  | 8.96063E-06 | 0.004550207 |
| 507.839993 | 350.422854  | 7.90856E-06 | 0.004016281 |
| 507.879993 | 355.751243  | 8.02881E-06 | 0.004077672 |
| 507.919993 | 438.83269   | 9.90384E-06 | 0.00503036  |
| 507.959993 | 634.107908  | 1.43109E-05 | 0.007269381 |
| 507.999993 | 1072.671564 | 2.42087E-05 | 0.012298021 |
| 508.039993 | 1802.510773 | 4.06802E-05 | 0.020667147 |
| 508.079993 | 2703.223795 | 6.1008E-05  | 0.030996942 |
| 508.119993 | 3610.650513 | 8.14874E-05 | 0.041405353 |
| 508.159993 | 4350.814937 | 9.81918E-05 | 0.049897161 |
| 508.199993 | 4715.38452  | 0.00010642  | 0.054082471 |
| 508.239993 | 4468.858894 | 0.000100856 | 0.051259012 |
| 508.279993 | 3779.824408 | 8.53054E-05 | 0.043359014 |
| 508.319993 | 2880.198367 | 6.50021E-05 | 0.033041849 |
| 508.359993 | 1937.064696 | 4.37169E-05 | 0.022223899 |
| 508.399993 | 1172.185499 | 2.64546E-05 | 0.013449515 |
| 508.439993 | 710.111268  | 1.60262E-05 | 0.008148372 |
| 508.479993 | 484.057848  | 1.09245E-05 | 0.005554895 |
| 508.519993 | 415.831834  | 9.38475E-06 | 0.004772331 |
| 508.559993 | 458.909673  | 1.0357E-05  | 0.005267131 |
| 508.599993 | 525.671065  | 1.18637E-05 | 0.006033859 |
| 508.639993 | 531.930515  | 1.20049E-05 | 0.006106188 |
| 508.679993 | 530.277718  | 1.19676E-05 | 0.006087694 |
| 508.719993 | 517.577559  | 1.1681E-05  | 0.005942361 |
| 508.759993 | 470.546852  | 1.06196E-05 | 0.005402821 |
| 508.799993 | 401.287063  | 9.05649E-06 | 0.004607942 |

|            |             |             |             |
|------------|-------------|-------------|-------------|
| 508.839993 | 362.680487  | 8.18519E-06 | 0.004164954 |
| 508.879993 | 366.295889  | 8.26679E-06 | 0.004206803 |
| 508.919993 | 461.759396  | 1.04213E-05 | 0.005303591 |
| 508.959993 | 758.184209  | 1.71112E-05 | 0.008708897 |
| 508.999993 | 1387.260592 | 3.13085E-05 | 0.015936046 |
| 509.039993 | 2373.041383 | 5.35562E-05 | 0.027262267 |
| 509.079993 | 3622.547372 | 8.17558E-05 | 0.041620267 |
| 509.119993 | 4919.369275 | 0.000111023 | 0.056524188 |
| 509.159993 | 5887.78704  | 0.000132879 | 0.067656748 |
| 509.199993 | 6320.773949 | 0.000142651 | 0.072637921 |
| 509.239993 | 6009.364068 | 0.000135623 | 0.069064644 |
| 509.279993 | 5088.110177 | 0.000114832 | 0.058481416 |
| 509.319993 | 3757.665914 | 8.48053E-05 | 0.043193028 |
| 509.359993 | 2366.438489 | 5.34072E-05 | 0.027203501 |
| 509.399993 | 1305.69386  | 2.94677E-05 | 0.015010842 |
| 509.439993 | 704.810935  | 1.59066E-05 | 0.008103459 |
| 509.479993 | 437.18121   | 9.86657E-06 | 0.005026821 |
| 509.519993 | 387.799128  | 8.75209E-06 | 0.004459363 |
| 509.559993 | 412.823569  | 9.31685E-06 | 0.004747496 |
| 509.599993 | 433.351189  | 9.78013E-06 | 0.004983956 |
| 509.639993 | 482.950526  | 1.08995E-05 | 0.005554832 |
| 509.679993 | 528.350281  | 1.19241E-05 | 0.00607749  |
| 509.719993 | 511.967895  | 1.15544E-05 | 0.00588951  |
| 509.759993 | 448.202063  | 1.01153E-05 | 0.005156373 |
| 509.799993 | 354.580641  | 8.00239E-06 | 0.004079619 |
| 509.839993 | 295.223365  | 6.66278E-06 | 0.003396952 |
| 509.879993 | 280.201091  | 6.32375E-06 | 0.003224353 |
| 509.919993 | 318.997706  | 7.19933E-06 | 0.003671084 |
| 509.959993 | 482.96313   | 1.08998E-05 | 0.005558465 |
| 509.999993 | 816.578292  | 1.8429E-05  | 0.009398808 |
| 510.039993 | 1351.971851 | 3.05121E-05 | 0.015562402 |
| 510.079993 | 2116.546818 | 4.77675E-05 | 0.024365253 |
| 510.119993 | 2900.806571 | 6.54672E-05 | 0.033396109 |
| 510.159993 | 3658.011402 | 8.25562E-05 | 0.042116882 |
| 510.199993 | 4155.189048 | 9.37768E-05 | 0.047844938 |
| 510.239993 | 3985.819335 | 8.99544E-05 | 0.045898328 |
| 510.279993 | 3334.308893 | 7.52507E-05 | 0.03839893  |
| 510.319993 | 2495.73246  | 5.63252E-05 | 0.028743878 |
| 510.359993 | 1659.33401  | 3.74489E-05 | 0.019112399 |
| 510.399993 | 974.546019  | 2.19941E-05 | 0.011225812 |
| 510.439993 | 560.490393  | 1.26495E-05 | 0.006456804 |
| 510.479993 | 396.04659   | 8.93822E-06 | 0.004562782 |
| 510.519993 | 354.739256  | 8.00597E-06 | 0.004087208 |
| 510.559993 | 380.019597  | 8.57651E-06 | 0.004378824 |
| 510.599993 | 452.942391  | 1.02223E-05 | 0.005219496 |
| 510.639993 | 508.857726  | 1.14842E-05 | 0.005864297 |

|            |             |             |             |
|------------|-------------|-------------|-------------|
| 510.679993 | 532.989481  | 1.20288E-05 | 0.006142883 |
| 510.719993 | 519.956819  | 1.17347E-05 | 0.005993146 |
| 510.759993 | 470.154562  | 1.06107E-05 | 0.005419538 |
| 510.799993 | 402.00266   | 9.07264E-06 | 0.004634304 |
| 510.839993 | 369.434218  | 8.33762E-06 | 0.004259188 |
| 510.879993 | 429.998418  | 9.70447E-06 | 0.004957817 |
| 510.919993 | 680.104886  | 1.5349E-05  | 0.007842121 |
| 510.959993 | 1283.712756 | 2.89716E-05 | 0.014803333 |
| 510.999993 | 2265.34387  | 5.11257E-05 | 0.02612521  |
| 511.039993 | 3487.127959 | 7.86996E-05 | 0.040218654 |
| 511.079993 | 4652.807804 | 0.000105007 | 0.053667177 |
| 511.119993 | 5614.141645 | 0.000126703 | 0.064760619 |
| 511.159993 | 6125.099928 | 0.000138235 | 0.070660188 |
| 511.199993 | 6182.623301 | 0.000139533 | 0.071329369 |
| 511.239993 | 5737.272798 | 0.000129482 | 0.066196507 |
| 511.279993 | 4790.56176  | 0.000108116 | 0.055277704 |
| 511.319993 | 3581.69581  | 8.08339E-05 | 0.041331982 |
| 511.359993 | 2357.046211 | 5.31952E-05 | 0.027201923 |
| 511.399993 | 1386.809362 | 3.12984E-05 | 0.016005979 |
| 511.439993 | 787.115146  | 1.77641E-05 | 0.009085267 |
| 511.479993 | 489.590184  | 1.10494E-05 | 0.005651531 |
| 511.519993 | 412.287086  | 9.30475E-06 | 0.004759563 |
| 511.559993 | 431.725475  | 9.74344E-06 | 0.004984355 |
| 511.599993 | 473.594547  | 1.06884E-05 | 0.00546817  |
| 511.639993 | 493.294024  | 1.1133E-05  | 0.005696067 |
| 511.679993 | 482.333954  | 1.08856E-05 | 0.005569947 |
| 511.719993 | 473.853083  | 1.06942E-05 | 0.005472438 |
| 511.759993 | 430.886889  | 9.72452E-06 | 0.004976619 |
| 511.799993 | 339.67125   | 7.66591E-06 | 0.003923411 |
| 511.839993 | 271.011316  | 6.11635E-06 | 0.003130591 |
| 511.879993 | 266.23963   | 6.00866E-06 | 0.003075712 |
| 511.919993 | 348.908484  | 7.87438E-06 | 0.004031052 |
| 511.959993 | 578.099495  | 1.30469E-05 | 0.006679491 |
| 511.999993 | 1028.527602 | 2.32124E-05 | 0.011884767 |
| 512.039993 | 1727.373786 | 3.89844E-05 | 0.019961582 |
| 512.079993 | 2586.696203 | 5.83781E-05 | 0.029894273 |
| 512.119993 | 3456.989899 | 7.80194E-05 | 0.039955319 |
| 512.159993 | 4180.186401 | 9.4341E-05  | 0.048317678 |
| 512.199993 | 4527.039055 | 0.000102169 | 0.052330944 |
| 512.239993 | 4339.951398 | 9.79467E-05 | 0.050172195 |
| 512.279993 | 3562.840602 | 8.04083E-05 | 0.041191589 |
| 512.319993 | 2592.377654 | 5.85064E-05 | 0.029973974 |
| 512.359993 | 1753.198812 | 3.95673E-05 | 0.020272679 |
| 512.399993 | 1073.653347 | 2.42309E-05 | 0.012415893 |
| 512.439993 | 630.8599    | 1.42376E-05 | 0.007295931 |
| 512.479993 | 419.309159  | 9.46322E-06 | 0.004849713 |

|            |             |             |             |
|------------|-------------|-------------|-------------|
| 512.519993 | 376.488413  | 8.49682E-06 | 0.00435479  |
| 512.559993 | 410.705065  | 9.26904E-06 | 0.00475094  |
| 512.599993 | 480.750691  | 1.08499E-05 | 0.005561645 |
| 512.639993 | 529.039838  | 1.19397E-05 | 0.006120764 |
| 512.679993 | 523.982366  | 1.18256E-05 | 0.006062724 |
| 512.719993 | 483.037818  | 1.09015E-05 | 0.005589412 |
| 512.759993 | 406.358991  | 9.17096E-06 | 0.0047025   |
| 512.799993 | 366.045335  | 8.26113E-06 | 0.004236309 |
| 512.839993 | 355.913917  | 8.03248E-06 | 0.004119378 |
| 512.879993 | 373.807244  | 8.43631E-06 | 0.004326814 |
| 512.919993 | 525.505378  | 1.18599E-05 | 0.006083192 |
| 512.959993 | 877.28164   | 1.9799E-05  | 0.010156108 |
| 512.999993 | 1503.896174 | 3.39408E-05 | 0.017411652 |
| 513.039993 | 2391.734963 | 5.39781E-05 | 0.027692938 |
| 513.079993 | 3315.754575 | 7.4832E-05  | 0.038394783 |
| 513.119993 | 4141.502269 | 9.34679E-05 | 0.047960267 |
| 513.159993 | 4762.561752 | 0.000107484 | 0.055156686 |
| 513.199993 | 4918.338763 | 0.000111    | 0.056965228 |
| 513.239993 | 4562.616089 | 0.000102972 | 0.052849292 |
| 513.279993 | 3785.393891 | 8.54311E-05 | 0.043850058 |
| 513.319993 | 2761.434379 | 6.23217E-05 | 0.031990989 |
| 513.359993 | 1791.022579 | 4.04209E-05 | 0.020750465 |
| 513.399993 | 1055.055122 | 2.38111E-05 | 0.012224631 |
| 513.439993 | 588.32717   | 1.32777E-05 | 0.006817315 |
| 513.479993 | 372.407111  | 8.40471E-06 | 0.00431565  |
| 513.519993 | 350.791652  | 7.91688E-06 | 0.004065476 |
| 513.559993 | 386.29811   | 8.71821E-06 | 0.004477324 |
| 513.599993 | 453.65376   | 1.02383E-05 | 0.005258408 |
| 513.639993 | 493.618634  | 1.11403E-05 | 0.005722096 |
| 513.679993 | 511.68961   | 1.15481E-05 | 0.005932039 |
| 513.719993 | 548.033573  | 1.23684E-05 | 0.006353871 |
| 513.759993 | 560.237985  | 1.26438E-05 | 0.006495874 |
| 513.799993 | 553.148256  | 1.24838E-05 | 0.006414169 |
| 513.839993 | 529.948576  | 1.19602E-05 | 0.00614563  |
| 513.879993 | 535.256465  | 1.208E-05   | 0.006207667 |
| 513.919993 | 673.685101  | 1.52041E-05 | 0.007813709 |
| 513.959993 | 1050.152425 | 2.37005E-05 | 0.012181097 |
| 513.999993 | 1774.406506 | 4.00459E-05 | 0.020583584 |
| 514.039993 | 2918.942752 | 6.58765E-05 | 0.033863141 |
| 514.079993 | 4193.123567 | 9.4633E-05  | 0.048648911 |
| 514.119993 | 5287.212105 | 0.000119325 | 0.061347375 |
| 514.159993 | 6034.831208 | 0.000136198 | 0.070027426 |
| 514.199993 | 6334.706068 | 0.000142965 | 0.073512855 |
| 514.239993 | 6082.056229 | 0.000137264 | 0.070586401 |
| 514.279993 | 5182.266159 | 0.000116957 | 0.060148403 |
| 514.319993 | 3852.433591 | 8.69441E-05 | 0.044717068 |

|            |             |             |             |
|------------|-------------|-------------|-------------|
| 514.359993 | 2533.240915 | 5.71717E-05 | 0.029406845 |
| 514.399993 | 1483.607331 | 3.3483E-05  | 0.01722363  |
| 514.439993 | 829.379758  | 1.87179E-05 | 0.00962926  |
| 514.479993 | 505.349285  | 1.1405E-05  | 0.005867659 |
| 514.519993 | 411.851067  | 9.2949E-06  | 0.004782414 |
| 514.559993 | 429.978644  | 9.70402E-06 | 0.0049933   |
| 514.599993 | 468.368233  | 1.05704E-05 | 0.005439537 |
| 514.639993 | 496.080165  | 1.11958E-05 | 0.005761826 |
| 514.679993 | 507.600741  | 1.14558E-05 | 0.005896093 |
| 514.719993 | 486.876646  | 1.09881E-05 | 0.005655809 |
| 514.759993 | 447.55014   | 1.01006E-05 | 0.005199376 |
| 514.799993 | 413.460487  | 9.33123E-06 | 0.004803716 |
| 514.839993 | 429.309834  | 9.68892E-06 | 0.004988246 |
| 514.879993 | 493.734189  | 1.11429E-05 | 0.005737253 |
| 514.919993 | 737.080895  | 1.66349E-05 | 0.008565637 |
| 514.959993 | 1352.174547 | 3.05167E-05 | 0.015714878 |
| 514.999993 | 2394.408961 | 5.40385E-05 | 0.027829814 |
| 515.039993 | 3936.836436 | 8.88489E-05 | 0.045760744 |
| 515.079993 | 5655.590233 | 0.000127639 | 0.065744189 |
| 515.119993 | 7013.493197 | 0.000158285 | 0.081535651 |
| 515.159993 | 7484.038673 | 0.000168904 | 0.087012753 |
| 515.199993 | 7053.200764 | 0.000159181 | 0.082010007 |
| 515.239993 | 6002.290072 | 0.000135463 | 0.069796123 |
| 515.279993 | 4666.396707 | 0.000105314 | 0.054266235 |
| 515.319993 | 3334.659134 | 7.52586E-05 | 0.038782267 |
| 515.359993 | 2120.399879 | 4.78545E-05 | 0.02466228  |
| 515.399993 | 1206.123738 | 2.72205E-05 | 0.014029462 |
| 515.439993 | 657.974909  | 1.48496E-05 | 0.007654066 |
| 515.479993 | 420.725915  | 9.4952E-06  | 0.004894585 |
| 515.519993 | 408.196199  | 9.21242E-06 | 0.004749187 |
| 515.559993 | 540.593292  | 1.22004E-05 | 0.006290058 |
| 515.599993 | 730.253813  | 1.64808E-05 | 0.008497506 |
| 515.639993 | 840.898651  | 1.89779E-05 | 0.00978577  |
| 515.679993 | 796.150161  | 1.7968E-05  | 0.009265738 |
| 515.719993 | 657.414546  | 1.48369E-05 | 0.007651702 |
| 515.759993 | 515.522629  | 1.16346E-05 | 0.006000675 |
| 515.799993 | 398.626804  | 8.99645E-06 | 0.00464037  |
| 515.839993 | 361.38504   | 8.15596E-06 | 0.004207169 |
| 515.879993 | 453.752586  | 1.02406E-05 | 0.005282902 |
| 515.919993 | 657.581956  | 1.48407E-05 | 0.007656618 |
| 515.959993 | 979.077226  | 2.20964E-05 | 0.011400863 |
| 515.999993 | 1622.156293 | 3.66098E-05 | 0.018890661 |
| 516.039993 | 2821.884812 | 6.3686E-05  | 0.032864528 |
| 516.079993 | 4799.53647  | 0.000108319 | 0.055901193 |
| 516.119993 | 7668.239522 | 0.000173061 | 0.089320492 |
| 516.159993 | 11344.73595 | 0.000256035 | 0.132154966 |



|            |             |             |             |
|------------|-------------|-------------|-------------|
| 516.199993 | 14960.76169 | 0.000337644 | 0.1742916   |
| 516.239993 | 17084.64836 | 0.000385577 | 0.199050121 |
| 516.279993 | 16540.79111 | 0.000373303 | 0.192728672 |
| 516.319993 | 13427.96959 | 0.000303051 | 0.156471068 |
| 516.359993 | 9085.570699 | 0.000205049 | 0.105878933 |
| 516.399993 | 5189.689682 | 0.000117124 | 0.060482868 |
| 516.439993 | 2590.394813 | 5.84616E-05 | 0.03019191  |
| 516.479993 | 1232.254679 | 2.78103E-05 | 0.014363449 |
| 516.519993 | 673.174256  | 1.51926E-05 | 0.007847284 |
| 516.559993 | 555.915676  | 1.25462E-05 | 0.006480887 |
| 516.599993 | 571.419634  | 1.28961E-05 | 0.006662149 |
| 516.639993 | 576.974959  | 1.30215E-05 | 0.006727439 |
| 516.679993 | 573.10124   | 1.29341E-05 | 0.006682789 |
| 516.719993 | 517.291987  | 1.16746E-05 | 0.006032478 |
| 516.759993 | 440.87694   | 9.94998E-06 | 0.005141751 |
| 516.799993 | 426.173223  | 9.61814E-06 | 0.004970653 |
| 516.839993 | 429.37811   | 9.69047E-06 | 0.00500842  |
| 516.879993 | 479.049723  | 1.08115E-05 | 0.00558824  |
| 516.919993 | 710.443579  | 1.60337E-05 | 0.008288151 |
| 516.959993 | 1307.055369 | 2.94984E-05 | 0.015249503 |
| 516.999993 | 2401.28942  | 5.41938E-05 | 0.028018172 |
| 517.039993 | 3952.024078 | 8.91917E-05 | 0.046115665 |
| 517.079993 | 5636.900047 | 0.000127217 | 0.065781356 |
| 517.119993 | 7133.134585 | 0.000160985 | 0.083248517 |
| 517.159993 | 8294.442248 | 0.000187194 | 0.096809252 |
| 517.199993 | 8905.434115 | 0.000200983 | 0.103948532 |
| 517.239993 | 8838.538741 | 0.000199474 | 0.103175676 |
| 517.279993 | 7939.309588 | 0.000179179 | 0.092685794 |
| 517.319993 | 6153.697311 | 0.00013888  | 0.071845596 |
| 517.359993 | 4094.790065 | 9.24137E-05 | 0.047811155 |
| 517.399993 | 2374.867141 | 5.35974E-05 | 0.027731317 |
| 517.439993 | 1236.635519 | 2.79091E-05 | 0.014441306 |
| 517.479993 | 665.564202  | 1.50209E-05 | 0.007772993 |
| 517.519993 | 478.649768  | 1.08025E-05 | 0.005590488 |
| 517.559993 | 446.253356  | 1.00713E-05 | 0.005212511 |
| 517.599993 | 474.378588  | 1.07061E-05 | 0.005541459 |
| 517.639993 | 510.789551  | 1.15278E-05 | 0.005967255 |
| 517.679993 | 491.856198  | 1.11005E-05 | 0.005746512 |
| 517.719993 | 413.053223  | 9.32204E-06 | 0.004826204 |
| 517.759993 | 353.908822  | 7.98723E-06 | 0.004135468 |
| 517.799993 | 329.117864  | 7.42773E-06 | 0.003846079 |
| 517.839993 | 297.064029  | 6.70432E-06 | 0.003471766 |
| 517.879993 | 279.646334  | 6.31123E-06 | 0.003268459 |
| 517.919993 | 364.253857  | 8.2207E-06  | 0.004257666 |
| 517.959993 | 619.300969  | 1.39768E-05 | 0.007239403 |
| 517.999993 | 1073.581061 | 2.42292E-05 | 0.012550741 |

|            |             |             |             |
|------------|-------------|-------------|-------------|
| 518.039993 | 1732.381358 | 3.90974E-05 | 0.020254035 |
| 518.079993 | 2528.274037 | 5.70596E-05 | 0.029561449 |
| 518.119993 | 3324.469332 | 7.50286E-05 | 0.03887384  |
| 518.159993 | 3962.415707 | 8.94262E-05 | 0.046337081 |
| 518.199993 | 4328.825092 | 9.76956E-05 | 0.050625835 |
| 518.239993 | 4163.027818 | 9.39537E-05 | 0.048690585 |
| 518.279993 | 3592.477186 | 8.10772E-05 | 0.042020694 |
| 518.319993 | 2764.267745 | 6.23857E-05 | 0.032335741 |
| 518.359993 | 1861.008244 | 4.20004E-05 | 0.021771308 |
| 518.399993 | 1102.319005 | 2.48778E-05 | 0.012896654 |
| 518.439993 | 629.009063  | 1.41959E-05 | 0.007359701 |
| 518.479993 | 409.148989  | 9.23392E-06 | 0.004787604 |
| 518.519993 | 353.660442  | 7.98162E-06 | 0.004138631 |
| 518.559993 | 403.597038  | 9.10862E-06 | 0.004723367 |
| 518.599993 | 477.433906  | 1.0775E-05  | 0.005587924 |
| 518.639993 | 538.888047  | 1.2162E-05  | 0.006307675 |
| 518.679993 | 571.788897  | 1.29045E-05 | 0.006693295 |
| 518.719993 | 566.355403  | 1.27819E-05 | 0.006630202 |
| 518.759993 | 531.634887  | 1.19983E-05 | 0.006224217 |
| 518.799993 | 527.788486  | 1.19115E-05 | 0.006179661 |
| 518.839993 | 657.735209  | 1.48442E-05 | 0.007701748 |
| 518.879993 | 1115.299994 | 2.51708E-05 | 0.013060608 |
| 518.919993 | 2339.863789 | 5.28075E-05 | 0.02740285  |
| 518.959993 | 4861.179219 | 0.00010971  | 0.056935124 |
| 518.999993 | 8599.546342 | 0.00019408  | 0.100727406 |
| 519.039993 | 12856.06209 | 0.000290143 | 0.150596036 |
| 519.079993 | 16209.94384 | 0.000365836 | 0.189898072 |
| 519.119993 | 17292.82738 | 0.000390275 | 0.202599569 |
| 519.159993 | 15637.07486 | 0.000352907 | 0.183215195 |
| 519.199993 | 12550.18548 | 0.00028324  | 0.147058313 |
| 519.239993 | 9361.773886 | 0.000211282 | 0.109706166 |
| 519.279993 | 6586.191089 | 0.000148641 | 0.07718638  |
| 519.319993 | 4322.744648 | 9.75583E-05 | 0.050663989 |
| 519.359993 | 2607.955884 | 5.88579E-05 | 0.030568455 |
| 519.399993 | 1457.070711 | 3.28841E-05 | 0.017079979 |
| 519.439993 | 801.142912  | 1.80807E-05 | 0.009391828 |
| 519.479993 | 494.455209  | 1.11592E-05 | 0.005796963 |
| 519.519993 | 407.149746  | 9.1888E-06  | 0.004773767 |
| 519.559993 | 419.808183  | 9.47449E-06 | 0.004922564 |
| 519.599993 | 458.355339  | 1.03444E-05 | 0.005374972 |
| 519.639993 | 468.829136  | 1.05808E-05 | 0.005498218 |
| 519.679993 | 428.483284  | 9.67027E-06 | 0.005025446 |
| 519.719993 | 384.640949  | 8.68081E-06 | 0.004511591 |
| 519.759993 | 347.276753  | 7.83755E-06 | 0.004073646 |
| 519.799993 | 318.020621  | 7.17728E-06 | 0.003730751 |
| 519.839993 | 355.891907  | 8.03198E-06 | 0.004175347 |

|            |             |             |             |
|------------|-------------|-------------|-------------|
| 519.879993 | 457.322118  | 1.03211E-05 | 0.005365745 |
| 519.919993 | 738.663878  | 1.66706E-05 | 0.008667386 |
| 519.959993 | 1463.382611 | 3.30265E-05 | 0.017172462 |
| 519.999993 | 2609.136091 | 5.88846E-05 | 0.030619975 |
| 520.039993 | 4048.1208   | 9.13604E-05 | 0.047511087 |
| 520.079993 | 5381.666577 | 0.000121457 | 0.063167209 |
| 520.119993 | 6033.34929  | 0.000136164 | 0.070821769 |
| 520.159993 | 6054.323512 | 0.000136638 | 0.071073438 |
| 520.199993 | 5546.515766 | 0.000125177 | 0.065117145 |
| 520.239993 | 4744.724931 | 0.000107082 | 0.055708252 |
| 520.279993 | 3862.96552  | 8.71818E-05 | 0.045358921 |
| 520.319993 | 3039.036828 | 6.85868E-05 | 0.035687098 |
| 520.359993 | 2293.540037 | 5.1762E-05  | 0.026934876 |
| 520.399993 | 1619.302349 | 3.65454E-05 | 0.019018225 |
| 520.439993 | 1078.495294 | 2.43401E-05 | 0.012667581 |
| 520.479993 | 715.084174  | 1.61385E-05 | 0.008399742 |
| 520.519993 | 559.367154  | 1.26241E-05 | 0.006571116 |
| 520.559993 | 569.854857  | 1.28608E-05 | 0.006694834 |
| 520.599993 | 619.53929   | 1.39821E-05 | 0.007279101 |
| 520.639993 | 635.583728  | 1.43442E-05 | 0.007468185 |
| 520.679993 | 613.466352  | 1.38451E-05 | 0.007208857 |
| 520.719993 | 576.823017  | 1.30181E-05 | 0.006778781 |
| 520.759993 | 549.682199  | 1.24056E-05 | 0.00646032  |
| 520.799993 | 552.820935  | 1.24764E-05 | 0.006497708 |
| 520.839993 | 620.00817   | 1.39927E-05 | 0.007287969 |
| 520.879993 | 801.75794   | 1.80946E-05 | 0.009425094 |
| 520.919993 | 1269.778735 | 2.86571E-05 | 0.014928076 |
| 520.959993 | 2243.790183 | 5.06392E-05 | 0.026381007 |
| 520.999993 | 3752.615327 | 8.46913E-05 | 0.044124167 |
| 521.039993 | 5442.10571  | 0.000122821 | 0.06399452  |
| 521.079993 | 6991.630815 | 0.000157791 | 0.082221925 |
| 521.119993 | 7974.585596 | 0.000179975 | 0.093788721 |
| 521.159993 | 8193.347242 | 0.000184912 | 0.096368963 |
| 521.199993 | 7707.556086 | 0.000173949 | 0.090662116 |
| 521.239993 | 6682.042945 | 0.000150804 | 0.078605285 |
| 521.279993 | 5375.93537  | 0.000121327 | 0.063245532 |
| 521.319993 | 3875.833054 | 8.74722E-05 | 0.045600982 |
| 521.359993 | 2493.868216 | 5.62831E-05 | 0.029343773 |
| 521.399993 | 1455.454973 | 3.28476E-05 | 0.017126734 |
| 521.439993 | 840.398551  | 1.89666E-05 | 0.009889957 |
| 521.479993 | 531.183532  | 1.19881E-05 | 0.00625154  |
| 521.519993 | 420.30852   | 9.48578E-06 | 0.004947023 |
| 521.559993 | 470.54486   | 1.06195E-05 | 0.005538728 |
| 521.599993 | 567.803003  | 1.28145E-05 | 0.006684055 |
| 521.639993 | 600.612607  | 1.3555E-05  | 0.007070825 |
| 521.679993 | 554.30275   | 1.25098E-05 | 0.006526134 |

|            |             |             |             |
|------------|-------------|-------------|-------------|
| 521.719993 | 482.290414  | 1.08846E-05 | 0.005678725 |
| 521.759993 | 432.327295  | 9.75702E-06 | 0.005090825 |
| 521.799993 | 396.763857  | 8.95441E-06 | 0.00467241  |
| 521.839993 | 378.65471   | 8.54571E-06 | 0.004459493 |
| 521.879993 | 432.55585   | 9.76218E-06 | 0.005094688 |
| 521.919993 | 603.879903  | 1.36287E-05 | 0.007113106 |
| 521.959993 | 911.821615  | 2.05785E-05 | 0.010741177 |
| 521.999993 | 1402.723004 | 3.16575E-05 | 0.016525217 |
| 522.039993 | 2121.439778 | 4.78779E-05 | 0.0249942   |
| 522.079993 | 2943.046358 | 6.64205E-05 | 0.034676792 |
| 522.119993 | 3761.187826 | 8.48848E-05 | 0.044320036 |
| 522.159993 | 4327.495268 | 9.76655E-05 | 0.050997038 |
| 522.199993 | 4455.242802 | 0.000100549 | 0.052506491 |
| 522.239993 | 4057.993705 | 9.15833E-05 | 0.047828444 |
| 522.279993 | 3322.506817 | 7.49844E-05 | 0.039162826 |
| 522.319993 | 2500.289505 | 5.64281E-05 | 0.029473499 |
| 522.359993 | 1746.550193 | 3.94172E-05 | 0.020589971 |
| 522.399993 | 1171.521126 | 2.64396E-05 | 0.013812047 |
| 522.439993 | 775.192893  | 1.7495E-05  | 0.0091401   |
| 522.479993 | 516.443868  | 1.16554E-05 | 0.006089723 |
| 522.519993 | 406.770377  | 9.18024E-06 | 0.004796859 |
| 522.559993 | 424.390997  | 9.57791E-06 | 0.005005035 |
| 522.599993 | 480.644411  | 1.08475E-05 | 0.00566889  |
| 522.639993 | 536.833347  | 1.21156E-05 | 0.006332087 |
| 522.679993 | 578.341322  | 1.30524E-05 | 0.006822206 |
| 522.719993 | 553.01051   | 1.24807E-05 | 0.006523899 |
| 522.759993 | 493.996051  | 1.11488E-05 | 0.005828148 |
| 522.799993 | 440.975034  | 9.95219E-06 | 0.005203006 |
| 522.839993 | 409.9136    | 9.25118E-06 | 0.004836886 |
| 522.879993 | 437.405367  | 9.87163E-06 | 0.005161678 |
| 522.919993 | 590.991296  | 1.33379E-05 | 0.006974629 |
| 522.959993 | 965.15393   | 2.17822E-05 | 0.011391209 |
| 522.999993 | 1610.975105 | 3.63575E-05 | 0.019014954 |
| 523.039993 | 2534.130133 | 5.71918E-05 | 0.029913592 |
| 523.079993 | 3624.41876  | 8.17981E-05 | 0.042786941 |
| 523.119993 | 4564.629522 | 0.000103017 | 0.053890425 |
| 523.159993 | 5256.311778 | 0.000118628 | 0.062061233 |
| 523.199993 | 5420.441292 | 0.000122332 | 0.064004002 |
| 523.239993 | 4848.686835 | 0.000109428 | 0.057257163 |
| 523.279993 | 3894.294357 | 8.78888E-05 | 0.04599045  |
| 523.319993 | 2836.024254 | 6.40051E-05 | 0.033495157 |
| 523.359993 | 1862.821377 | 4.20413E-05 | 0.022002726 |
| 523.399993 | 1146.607716 | 2.58773E-05 | 0.013544199 |
| 523.439993 | 713.477451  | 1.61022E-05 | 0.008428531 |
| 523.479993 | 497.572087  | 1.12295E-05 | 0.005878423 |
| 523.519993 | 415.902712  | 9.38634E-06 | 0.004913939 |

|            |             |             |             |
|------------|-------------|-------------|-------------|
| 523.559993 | 427.530795  | 9.64877E-06 | 0.005051712 |
| 523.599993 | 457.860977  | 1.03333E-05 | 0.005410508 |
| 523.639993 | 463.384373  | 1.04579E-05 | 0.005476196 |
| 523.679993 | 472.915967  | 1.06731E-05 | 0.005589265 |
| 523.719993 | 471.149549  | 1.06332E-05 | 0.005568814 |
| 523.759993 | 404.749355  | 9.13463E-06 | 0.004784353 |
| 523.799993 | 328.353369  | 7.41048E-06 | 0.003881608 |
| 523.839993 | 284.070323  | 6.41107E-06 | 0.003358376 |
| 523.879993 | 298.687164  | 6.74095E-06 | 0.003531451 |
| 523.919993 | 374.461312  | 8.45107E-06 | 0.004427685 |
| 523.959993 | 555.945879  | 1.25469E-05 | 0.006574086 |
| 523.999993 | 932.152719  | 2.10374E-05 | 0.011023591 |
| 524.039993 | 1512.310877 | 3.41308E-05 | 0.017885878 |
| 524.079993 | 2236.721174 | 5.04797E-05 | 0.026455391 |
| 524.119993 | 2995.509961 | 6.76045E-05 | 0.035432863 |
| 524.159993 | 3482.306167 | 7.85908E-05 | 0.041194153 |
| 524.199993 | 3620.167624 | 8.17021E-05 | 0.042828262 |
| 524.239993 | 3412.114305 | 7.70067E-05 | 0.040369975 |
| 524.279993 | 2851.10153  | 6.43454E-05 | 0.033735001 |
| 524.319993 | 2117.243027 | 4.77832E-05 | 0.025053701 |
| 524.359993 | 1417.517877 | 3.19914E-05 | 0.016775012 |
| 524.399993 | 887.109769  | 2.00208E-05 | 0.010498924 |
| 524.439993 | 569.541626  | 1.28538E-05 | 0.006741026 |
| 524.479993 | 401.165616  | 9.05375E-06 | 0.00474851  |
| 524.519993 | 358.17275   | 8.08346E-06 | 0.004239936 |
| 524.559993 | 417.689415  | 9.42667E-06 | 0.004944853 |
| 524.599993 | 499.291893  | 1.12683E-05 | 0.005911362 |
| 524.639993 | 521.775845  | 1.17758E-05 | 0.006178032 |
| 524.679993 | 519.516596  | 1.17248E-05 | 0.00615175  |
| 524.719993 | 526.824983  | 1.18897E-05 | 0.006238766 |
| 524.759993 | 499.093255  | 1.12638E-05 | 0.005910812 |
| 524.799993 | 470.692031  | 1.06229E-05 | 0.005574879 |
| 524.839993 | 437.85812   | 9.88185E-06 | 0.005186389 |
| 524.879993 | 456.97374   | 1.03133E-05 | 0.005413224 |
| 524.919993 | 542.924592  | 1.22531E-05 | 0.006431872 |
| 524.959993 | 718.871475  | 1.62239E-05 | 0.008516913 |
| 524.999993 | 1170.688375 | 2.64208E-05 | 0.013870923 |
| 525.039993 | 1937.252993 | 4.37211E-05 | 0.022955327 |
| 525.079993 | 2857.580294 | 6.44916E-05 | 0.033863253 |
| 525.119993 | 3788.354535 | 8.54979E-05 | 0.044896649 |
| 525.159993 | 4456.905035 | 0.000100586 | 0.052823816 |
| 525.199993 | 4697.969603 | 0.000106027 | 0.055685185 |
| 525.239993 | 4339.377103 | 9.79337E-05 | 0.051438694 |
| 525.279993 | 3615.014639 | 8.15858E-05 | 0.042855412 |
| 525.319993 | 2750.384186 | 6.20723E-05 | 0.032607841 |
| 525.359993 | 1867.282381 | 4.2142E-05  | 0.022139701 |

|            |             |             |             |
|------------|-------------|-------------|-------------|
| 525.399993 | 1107.440479 | 2.49934E-05 | 0.013131526 |
| 525.439993 | 644.654888  | 1.4549E-05  | 0.007644607 |
| 525.479993 | 423.480234  | 9.55736E-06 | 0.005022201 |
| 525.519993 | 342.780895  | 7.73609E-06 | 0.004065469 |
| 525.559993 | 353.833099  | 7.98552E-06 | 0.00419687  |
| 525.599993 | 406.753151  | 9.17985E-06 | 0.00482493  |
| 525.639993 | 438.927408  | 9.90598E-06 | 0.005206979 |
| 525.679993 | 450.264535  | 1.01618E-05 | 0.005341878 |
| 525.719993 | 424.801599  | 9.58718E-06 | 0.005040172 |
| 525.759993 | 383.944452  | 8.66509E-06 | 0.004555758 |
| 525.799993 | 330.005554  | 7.44777E-06 | 0.003916035 |
| 525.839993 | 297.186181  | 6.70708E-06 | 0.00352685  |
| 525.879993 | 309.687078  | 6.98921E-06 | 0.003675484 |
| 525.919993 | 398.459985  | 8.99269E-06 | 0.004729434 |
| 525.959993 | 574.462153  | 1.29648E-05 | 0.006818972 |
| 525.999993 | 850.936428  | 1.92044E-05 | 0.010101541 |
| 526.039993 | 1326.850819 | 2.99452E-05 | 0.01575236  |
| 526.079993 | 1989.861743 | 4.49084E-05 | 0.023625415 |
| 526.119993 | 2650.730611 | 5.98233E-05 | 0.031474233 |
| 526.159993 | 3204.313246 | 7.23169E-05 | 0.038050253 |
| 526.199993 | 3379.838965 | 7.62783E-05 | 0.040137619 |
| 526.239993 | 3116.706744 | 7.03397E-05 | 0.037015579 |
| 526.279993 | 2596.863923 | 5.86076E-05 | 0.030844008 |
| 526.319993 | 1928.435689 | 4.35221E-05 | 0.022906555 |
| 526.359993 | 1248.638028 | 2.818E-05   | 0.014832836 |
| 526.399993 | 750.103288  | 1.69288E-05 | 0.008911313 |
| 526.439993 | 475.378068  | 1.07286E-05 | 0.005647975 |
| 526.479993 | 343.236452  | 7.74637E-06 | 0.004078308 |
| 526.519993 | 334.204416  | 7.54253E-06 | 0.003971292 |
| 526.559993 | 397.767166  | 8.97705E-06 | 0.004726956 |
| 526.599993 | 460.805152  | 1.03997E-05 | 0.005476498 |
| 526.639993 | 518.537381  | 1.17027E-05 | 0.006163092 |
| 526.679993 | 507.567425  | 1.14551E-05 | 0.006033167 |
| 526.719993 | 470.126461  | 1.06101E-05 | 0.005588551 |
| 526.759993 | 419.259755  | 9.46211E-06 | 0.00498426  |
| 526.799993 | 362.072906  | 8.17148E-06 | 0.004304736 |
| 526.839993 | 347.022776  | 7.83182E-06 | 0.004126116 |
| 526.879993 | 385.253798  | 8.69464E-06 | 0.004581033 |
| 526.919993 | 526.96723   | 1.18929E-05 | 0.006266615 |
| 526.959993 | 874.367605  | 1.97333E-05 | 0.010398638 |
| 526.999993 | 1573.807849 | 3.55187E-05 | 0.018718329 |
| 527.039993 | 2632.202009 | 5.94051E-05 | 0.031308881 |
| 527.079993 | 3906.027976 | 8.81536E-05 | 0.046464005 |
| 527.119993 | 5138.258848 | 0.000115963 | 0.061126598 |
| 527.159993 | 5979.650332 | 0.000134952 | 0.071141495 |
| 527.199993 | 6117.633433 | 0.000138066 | 0.07278864  |

|            |             |             |             |
|------------|-------------|-------------|-------------|
| 527.239993 | 5460.775649 | 0.000123242 | 0.064978164 |
| 527.279993 | 4328.349082 | 9.76848E-05 | 0.051507246 |
| 527.319993 | 3075.467161 | 6.9409E-05  | 0.036600759 |
| 527.359993 | 1939.346914 | 4.37684E-05 | 0.023081681 |
| 527.399993 | 1098.41131  | 2.47896E-05 | 0.013074042 |
| 527.439993 | 622.574672  | 1.40506E-05 | 0.007410871 |
| 527.479993 | 395.411748  | 8.92389E-06 | 0.004707175 |
| 527.519993 | 299.414283  | 6.75736E-06 | 0.003564644 |
| 527.559993 | 310.784007  | 7.01396E-06 | 0.003700286 |
| 527.599993 | 426.338864  | 9.62187E-06 | 0.005076501 |
| 527.639993 | 518.803098  | 1.17087E-05 | 0.006177959 |
| 527.679993 | 505.204383  | 1.14018E-05 | 0.00601648  |
| 527.719993 | 436.144217  | 9.84317E-06 | 0.005194436 |
| 527.759993 | 369.316492  | 8.33496E-06 | 0.004398858 |
| 527.799993 | 321.046174  | 7.24556E-06 | 0.003824209 |
| 527.839993 | 273.697888  | 6.17698E-06 | 0.003260457 |
| 527.879993 | 275.119686  | 6.20907E-06 | 0.003277643 |
| 527.919993 | 323.824174  | 7.30826E-06 | 0.003858177 |
| 527.959993 | 491.173901  | 1.10851E-05 | 0.005852495 |
| 527.999993 | 835.763945  | 1.8862E-05  | 0.009959151 |
| 528.039993 | 1441.949999 | 3.25428E-05 | 0.017183901 |
| 528.079993 | 2241.665551 | 5.05913E-05 | 0.026716237 |
| 528.119993 | 3139.708823 | 7.08589E-05 | 0.037421978 |
| 528.159993 | 3921.554149 | 8.8504E-05  | 0.04674428  |
| 528.199993 | 4384.791619 | 9.89586E-05 | 0.052269953 |
| 528.239993 | 4237.015805 | 9.56235E-05 | 0.050512181 |
| 528.279993 | 3544.064585 | 7.99846E-05 | 0.042254265 |
| 528.319993 | 2597.160478 | 5.86143E-05 | 0.030967104 |
| 528.359993 | 1657.531701 | 3.74082E-05 | 0.019764987 |
| 528.399993 | 949.497939  | 2.14288E-05 | 0.011323002 |
| 528.439993 | 556.47709   | 1.25589E-05 | 0.006636632 |
| 528.479993 | 373.92562   | 8.43898E-06 | 0.004459832 |
| 528.519993 | 310.924454  | 7.01713E-06 | 0.003708694 |
| 528.559993 | 356.057387  | 8.03572E-06 | 0.00424736  |
| 528.599993 | 450.881153  | 1.01758E-05 | 0.005378906 |
| 528.639993 | 522.262579  | 1.17867E-05 | 0.006230942 |
| 528.679993 | 541.027524  | 1.22102E-05 | 0.006455308 |
| 528.719993 | 499.858988  | 1.12811E-05 | 0.005964554 |
| 528.759993 | 433.953363  | 9.79372E-06 | 0.005178529 |
| 528.799993 | 366.6617    | 8.27504E-06 | 0.004375843 |
| 528.839993 | 342.731969  | 7.73498E-06 | 0.004090568 |
| 528.879993 | 364.601938  | 8.22856E-06 | 0.00435192  |
| 528.919993 | 475.648144  | 1.07347E-05 | 0.005677806 |
| 528.959993 | 738.994256  | 1.66781E-05 | 0.008822032 |
| 528.999993 | 1257.379918 | 2.83773E-05 | 0.015011599 |
| 529.039993 | 2163.20053  | 4.88204E-05 | 0.025827956 |

|            |             |             |             |
|------------|-------------|-------------|-------------|
| 529.079993 | 3233.257547 | 7.29701E-05 | 0.03860703  |
| 529.119993 | 4165.817765 | 9.40167E-05 | 0.049746118 |
| 529.159993 | 4835.413999 | 0.000109129 | 0.057746467 |
| 529.199993 | 5112.059353 | 0.000115372 | 0.061054893 |
| 529.239993 | 4829.925846 | 0.000109005 | 0.057689646 |
| 529.279993 | 4103.524526 | 9.26108E-05 | 0.049017061 |
| 529.319993 | 3075.969479 | 6.94203E-05 | 0.036745577 |
| 529.359993 | 2034.169959 | 4.59084E-05 | 0.024302061 |
| 529.399993 | 1199.840643 | 2.70787E-05 | 0.014335481 |
| 529.439993 | 691.26115   | 1.56008E-05 | 0.008259688 |
| 529.479993 | 429.320455  | 9.68916E-06 | 0.005130219 |
| 529.519993 | 365.651169  | 8.25224E-06 | 0.004369725 |
| 529.559993 | 406.208705  | 9.16756E-06 | 0.004854775 |
| 529.599993 | 475.684878  | 1.07355E-05 | 0.005685545 |
| 529.639993 | 508.799559  | 1.14829E-05 | 0.006081802 |
| 529.679993 | 470.161002  | 1.06109E-05 | 0.00562037  |
| 529.719993 | 398.080338  | 8.98412E-06 | 0.004759067 |
| 529.759993 | 346.534165  | 7.82079E-06 | 0.004143143 |
| 529.799993 | 332.495295  | 7.50396E-06 | 0.003975596 |
| 529.839993 | 343.748006  | 7.75791E-06 | 0.004110453 |
| 529.879993 | 377.227255  | 8.51349E-06 | 0.00451113  |
| 529.919993 | 451.105048  | 1.01808E-05 | 0.005395016 |
| 529.959993 | 661.033646  | 1.49186E-05 | 0.007906266 |
| 529.999993 | 1121.323861 | 2.53067E-05 | 0.01341256  |
| 530.039993 | 1903.309946 | 4.29551E-05 | 0.022767897 |
| 530.079993 | 3090.542938 | 6.97492E-05 | 0.036972682 |
| 530.119993 | 4632.956693 | 0.000104559 | 0.055429017 |
| 530.159993 | 6425.715347 | 0.000145019 | 0.076883508 |
| 530.199993 | 7870.032626 | 0.000177616 | 0.094171829 |
| 530.239993 | 8265.256957 | 0.000186535 | 0.098908496 |
| 530.279993 | 7373.794131 | 0.000166416 | 0.088247215 |
| 530.319993 | 5621.714529 | 0.000126874 | 0.06728396  |
| 530.359993 | 3642.054752 | 8.21961E-05 | 0.043593525 |
| 530.399993 | 2031.534306 | 4.58489E-05 | 0.024318256 |
| 530.439993 | 1033.760338 | 2.33305E-05 | 0.012375447 |
| 530.479993 | 572.072119  | 1.29109E-05 | 0.006848959 |
| 530.519993 | 409.407857  | 9.23977E-06 | 0.00490188  |
| 530.559993 | 380.420772  | 8.58557E-06 | 0.004555158 |
| 530.599993 | 421.197414  | 9.50584E-06 | 0.005043798 |
| 530.639993 | 491.530862  | 1.10932E-05 | 0.005886478 |
| 530.679993 | 518.427112  | 1.17002E-05 | 0.00620905  |
| 530.719993 | 503.871221  | 1.13717E-05 | 0.006035173 |
| 530.759993 | 429.932316  | 9.70297E-06 | 0.00514995  |
| 530.799993 | 342.827811  | 7.73715E-06 | 0.004106877 |
| 530.839993 | 310.920307  | 7.01704E-06 | 0.003724925 |
| 530.879993 | 367.28862   | 8.28919E-06 | 0.004400566 |



|            |             |             |             |
|------------|-------------|-------------|-------------|
| 530.919993 | 521.026578  | 1.17588E-05 | 0.006243005 |
| 530.959993 | 882.400855  | 1.99146E-05 | 0.010573834 |
| 530.999993 | 1557.023767 | 3.51399E-05 | 0.018659264 |
| 531.039993 | 2535.040682 | 5.72123E-05 | 0.030382039 |
| 531.079993 | 3741.281177 | 8.44355E-05 | 0.044842007 |
| 531.119993 | 4901.557286 | 0.000110621 | 0.058753195 |
| 531.159993 | 5860.469599 | 0.000132263 | 0.070252621 |
| 531.199993 | 6385.678571 | 0.000144116 | 0.07655435  |
| 531.239993 | 6121.559295 | 0.000138155 | 0.073393497 |
| 531.279993 | 5200.787463 | 0.000117375 | 0.062358739 |
| 531.319993 | 3902.755349 | 8.80798E-05 | 0.046798533 |
| 531.359993 | 2557.011298 | 5.77082E-05 | 0.03066382  |
| 531.399993 | 1499.422958 | 3.38399E-05 | 0.017982516 |
| 531.439993 | 848.684065  | 1.91536E-05 | 0.010178998 |
| 531.479993 | 523.409858  | 1.18126E-05 | 0.006278177 |
| 531.519993 | 443.969786  | 1.00198E-05 | 0.005325713 |
| 531.559993 | 484.885016  | 1.09432E-05 | 0.005816956 |
| 531.599993 | 485.812672  | 1.09641E-05 | 0.005828524 |
| 531.639993 | 460.491874  | 1.03927E-05 | 0.005525154 |
| 531.679993 | 455.677337  | 1.0284E-05  | 0.005467799 |
| 531.719993 | 458.216803  | 1.03413E-05 | 0.005498684 |
| 531.759993 | 424.957141  | 9.59069E-06 | 0.005099946 |
| 531.799993 | 381.556793  | 8.61121E-06 | 0.004579439 |
| 531.839993 | 355.180595  | 8.01593E-06 | 0.004263193 |
| 531.879993 | 337.777123  | 7.62316E-06 | 0.004054606 |
| 531.919993 | 396.293766  | 8.9438E-06  | 0.004757385 |
| 531.959993 | 589.571721  | 1.33058E-05 | 0.00707816  |
| 531.999993 | 997.363916  | 2.25091E-05 | 0.011974849 |
| 532.039993 | 1687.015893 | 3.80736E-05 | 0.020256677 |
| 532.079993 | 2578.916103 | 5.82025E-05 | 0.030968409 |
| 532.119993 | 3491.208408 | 7.87917E-05 | 0.041926645 |
| 532.159993 | 4286.586493 | 9.67423E-05 | 0.051482374 |
| 532.199993 | 4761.073203 | 0.000107451 | 0.05718531  |
| 532.239993 | 4750.846967 | 0.00010722  | 0.057066771 |
| 532.279993 | 4098.812826 | 9.25045E-05 | 0.049238293 |
| 532.319993 | 3057.183697 | 6.89964E-05 | 0.036728151 |
| 532.359993 | 2007.865743 | 4.53147E-05 | 0.024123751 |
| 532.399993 | 1171.37179  | 2.64362E-05 | 0.014074649 |
| 532.439993 | 650.698989  | 1.46854E-05 | 0.007819078 |
| 532.479993 | 404.762786  | 9.13493E-06 | 0.004864169 |
| 532.519993 | 350.988761  | 7.92133E-06 | 0.004218265 |
| 532.559993 | 406.237287  | 9.16821E-06 | 0.004882622 |
| 532.599993 | 487.363424  | 1.09991E-05 | 0.005858128 |
| 532.639993 | 529.059883  | 1.19401E-05 | 0.006359799 |
| 532.679993 | 502.964022  | 1.13512E-05 | 0.006046556 |
| 532.719993 | 449.399488  | 1.01423E-05 | 0.005403017 |

|            |             |             |             |
|------------|-------------|-------------|-------------|
| 532.759993 | 413.256771  | 9.32663E-06 | 0.004968855 |
| 532.799993 | 382.457622  | 8.63154E-06 | 0.004598882 |
| 532.839993 | 372.742842  | 8.41229E-06 | 0.004482403 |
| 532.879993 | 451.601859  | 1.0192E-05  | 0.005431126 |
| 532.919993 | 673.296661  | 1.51954E-05 | 0.008097915 |
| 532.959993 | 1130.147537 | 2.55059E-05 | 0.013593601 |
| 532.999993 | 1986.806148 | 4.48394E-05 | 0.023899425 |
| 533.039993 | 3107.847542 | 7.01398E-05 | 0.037387313 |
| 533.079993 | 4207.511102 | 9.49577E-05 | 0.050620031 |
| 533.119993 | 5078.435612 | 0.000114613 | 0.061102598 |
| 533.159993 | 5563.219792 | 0.000125554 | 0.066940435 |
| 533.199993 | 5626.07123  | 0.000126973 | 0.067701785 |
| 533.239993 | 5130.160649 | 0.000115781 | 0.061738836 |
| 533.279993 | 4241.496034 | 9.57247E-05 | 0.051048045 |
| 533.319993 | 3159.74452  | 7.1311E-05  | 0.038031599 |
| 533.359993 | 2129.066062 | 4.80501E-05 | 0.025627977 |
| 533.399993 | 1278.082813 | 2.88445E-05 | 0.015385682 |
| 533.439993 | 711.425156  | 1.60559E-05 | 0.008564846 |
| 533.479993 | 437.425211  | 9.87208E-06 | 0.005266556 |
| 533.519993 | 350.122604  | 7.90178E-06 | 0.004215757 |
| 533.559993 | 385.973122  | 8.71088E-06 | 0.004647775 |
| 533.599993 | 446.467164  | 1.00761E-05 | 0.005376629 |
| 533.639993 | 480.910115  | 1.08535E-05 | 0.005791846 |
| 533.679993 | 478.39061   | 1.07966E-05 | 0.005761935 |
| 533.719993 | 433.126379  | 9.77506E-06 | 0.005217144 |
| 533.759993 | 386.626325  | 8.72562E-06 | 0.004657386 |
| 533.799993 | 324.456356  | 7.32253E-06 | 0.003908765 |
| 533.839993 | 280.052847  | 6.3204E-06  | 0.003374084 |
| 533.879993 | 286.822098  | 6.47318E-06 | 0.003455899 |
| 533.919993 | 400.016193  | 9.02781E-06 | 0.004820127 |
| 533.959993 | 615.850722  | 1.38989E-05 | 0.007421453 |
| 533.999993 | 944.652302  | 2.13195E-05 | 0.011384606 |
| 534.039993 | 1511.997925 | 3.41237E-05 | 0.018223414 |
| 534.079993 | 2162.823221 | 4.88119E-05 | 0.026069463 |
| 534.119993 | 2741.103115 | 6.18629E-05 | 0.033042201 |
| 534.159993 | 3199.689187 | 7.22125E-05 | 0.038573044 |
| 534.199993 | 3366.094408 | 7.59681E-05 | 0.040582138 |
| 534.239993 | 3169.945954 | 7.15413E-05 | 0.038220205 |
| 534.279993 | 2727.31613  | 6.15517E-05 | 0.032885856 |
| 534.319993 | 2102.670322 | 4.74543E-05 | 0.025355803 |
| 534.359993 | 1435.110178 | 3.23884E-05 | 0.017307085 |
| 534.399993 | 887.02163   | 2.00188E-05 | 0.010698069 |
| 534.439993 | 542.352161  | 1.22401E-05 | 0.006541617 |
| 534.479993 | 361.752611  | 8.16425E-06 | 0.00436363  |
| 534.519993 | 305.504942  | 6.89482E-06 | 0.00368542  |
| 534.559993 | 334.147308  | 7.54124E-06 | 0.004031245 |

|            |             |             |             |
|------------|-------------|-------------|-------------|
| 534.599993 | 420.854046  | 9.49809E-06 | 0.005077679 |
| 534.639993 | 511.136885  | 1.15356E-05 | 0.006167419 |
| 534.679993 | 558.151741  | 1.25967E-05 | 0.006735207 |
| 534.719993 | 508.493847  | 1.1476E-05  | 0.006136445 |
| 534.759993 | 439.846175  | 9.92672E-06 | 0.00530841  |
| 534.799993 | 472.632692  | 1.06667E-05 | 0.005704531 |
| 534.839993 | 671.1016    | 1.51458E-05 | 0.008100595 |
| 534.879993 | 1411.828108 | 3.1863E-05  | 0.017042878 |
| 534.919993 | 3108.32168  | 7.01505E-05 | 0.0375249   |
| 534.959993 | 5880.346024 | 0.000132711 | 0.070995193 |
| 534.999993 | 9202.884291 | 0.000207696 | 0.111117508 |
| 535.039993 | 12156.03285 | 0.000274345 | 0.146785402 |
| 535.079993 | 13594.93623 | 0.000306819 | 0.164172588 |
| 535.119993 | 13126.39601 | 0.000296244 | 0.158526341 |
| 535.159993 | 11369.85095 | 0.000256602 | 0.137322963 |
| 535.199993 | 9055.268564 | 0.000204365 | 0.109376039 |
| 535.239993 | 6839.533248 | 0.000154359 | 0.08261897  |
| 535.279993 | 4950.523385 | 0.000111726 | 0.059804916 |
| 535.319993 | 3372.649225 | 7.6116E-05  | 0.040746414 |
| 535.359993 | 2088.160896 | 4.71269E-05 | 0.025229848 |
| 535.399993 | 1172.743788 | 2.64672E-05 | 0.014170535 |
| 535.439993 | 630.011037  | 1.42185E-05 | 0.007613138 |
| 535.479993 | 390.325239  | 8.8091E-06  | 0.004717095 |
| 535.519993 | 375.304632  | 8.4701E-06  | 0.004535909 |
| 535.559992 | 430.396463  | 9.71345E-06 | 0.005202134 |
| 535.599992 | 486.855611  | 1.09877E-05 | 0.005884987 |
| 535.639992 | 519.352478  | 1.17211E-05 | 0.00627827  |
| 535.679992 | 507.803953  | 1.14604E-05 | 0.006139122 |
| 535.719992 | 487.91706   | 1.10116E-05 | 0.005899139 |
| 535.759992 | 445.457685  | 1.00534E-05 | 0.005386188 |
| 535.799992 | 396.566506  | 8.94995E-06 | 0.004795385 |
| 535.839992 | 396.353731  | 8.94515E-06 | 0.00479317  |
| 535.879992 | 503.812101  | 1.13703E-05 | 0.006093136 |
| 535.919992 | 857.01722   | 1.93417E-05 | 0.010365596 |
| 535.959992 | 1542.007809 | 3.4801E-05  | 0.018651927 |
| 535.999992 | 2575.80445  | 5.81323E-05 | 0.031158922 |
| 536.039992 | 3736.097981 | 8.43185E-05 | 0.045198103 |
| 536.079992 | 4581.96299  | 0.000103409 | 0.05543524  |
| 536.119992 | 5010.486207 | 0.00011308  | 0.060624285 |
| 536.159992 | 4970.485885 | 0.000112177 | 0.060144789 |
| 536.199992 | 4427.770309 | 9.99286E-05 | 0.053581719 |
| 536.239992 | 3670.918972 | 8.28475E-05 | 0.044426158 |
| 536.279992 | 2872.551953 | 6.48295E-05 | 0.034766762 |
| 536.319992 | 2072.153278 | 4.67656E-05 | 0.025081333 |
| 536.359992 | 1370.075819 | 3.09207E-05 | 0.016584628 |
| 536.399992 | 860.240783  | 1.94144E-05 | 0.010413903 |

|            |             |             |             |
|------------|-------------|-------------|-------------|
| 536.439992 | 542.294667  | 1.22388E-05 | 0.006565401 |
| 536.479992 | 392.549555  | 8.8593E-06  | 0.004752835 |
| 536.519992 | 382.855391  | 8.64051E-06 | 0.004635808 |
| 536.559992 | 416.854141  | 9.40782E-06 | 0.005047858 |
| 536.599992 | 463.578078  | 1.04623E-05 | 0.005614076 |
| 536.639992 | 484.702296  | 1.09391E-05 | 0.005870335 |
| 536.679992 | 450.207036  | 1.01605E-05 | 0.005452962 |
| 536.719992 | 395.273328  | 8.92077E-06 | 0.004787955 |
| 536.759992 | 369.184348  | 8.33198E-06 | 0.004472272 |
| 536.799992 | 371.49489   | 8.38412E-06 | 0.004500597 |
| 536.839992 | 437.672302  | 9.87765E-06 | 0.00530272  |
| 536.879992 | 662.686285  | 1.49559E-05 | 0.008029527 |
| 536.919992 | 1092.23832  | 2.46503E-05 | 0.013235238 |
| 536.959992 | 1883.024332 | 4.24972E-05 | 0.022819316 |
| 536.999992 | 3096.482406 | 6.98833E-05 | 0.037527329 |
| 537.039992 | 4474.309802 | 0.000100979 | 0.054229729 |
| 537.079992 | 5654.097709 | 0.000127605 | 0.068534151 |
| 537.119992 | 6332.020526 | 0.000142905 | 0.07675707  |
| 537.159992 | 6369.048533 | 0.000143741 | 0.077211675 |
| 537.199992 | 5967.910898 | 0.000134687 | 0.07235409  |
| 537.239992 | 5157.608011 | 0.0001164   | 0.062534751 |
| 537.279992 | 4070.911848 | 9.18748E-05 | 0.049362497 |
| 537.319992 | 2937.279765 | 6.62903E-05 | 0.03561911  |
| 537.359992 | 1898.782559 | 4.28529E-05 | 0.023027422 |
| 537.399992 | 1088.991653 | 2.4577E-05  | 0.013207693 |
| 537.439992 | 600.090854  | 1.35432E-05 | 0.007278665 |
| 537.479992 | 388.809769  | 8.77489E-06 | 0.00471633  |
| 537.519992 | 356.356697  | 8.04247E-06 | 0.004322991 |
| 537.559992 | 382.566963  | 8.634E-06   | 0.004641295 |
| 537.599992 | 435.774958  | 9.83483E-06 | 0.005287207 |
| 537.639992 | 479.036083  | 1.08112E-05 | 0.005812521 |
| 537.679992 | 488.217248  | 1.10184E-05 | 0.005924364 |
| 537.719992 | 446.246003  | 1.00712E-05 | 0.005415459 |
| 537.759992 | 374.382065  | 8.44928E-06 | 0.004543686 |
| 537.799992 | 300.298022  | 6.77731E-06 | 0.003644836 |
| 537.839992 | 272.296257  | 6.14535E-06 | 0.003305214 |
| 537.879992 | 311.863095  | 7.03832E-06 | 0.003785769 |
| 537.919992 | 446.539633  | 1.00778E-05 | 0.005421038 |
| 537.959992 | 740.823006  | 1.67193E-05 | 0.008994338 |
| 537.999992 | 1226.196289 | 2.76735E-05 | 0.014888366 |
| 538.039992 | 1942.010478 | 4.38285E-05 | 0.02358147  |
| 538.079992 | 2821.990017 | 6.36884E-05 | 0.034269445 |
| 538.119992 | 3555.432902 | 8.02412E-05 | 0.043179377 |
| 538.159992 | 4043.111934 | 9.12474E-05 | 0.049105703 |
| 538.199992 | 4215.380421 | 9.51353E-05 | 0.051201799 |
| 538.239992 | 4097.60129  | 9.24772E-05 | 0.049774902 |

|            |             |             |             |
|------------|-------------|-------------|-------------|
| 538.279992 | 3651.660533 | 8.24129E-05 | 0.044361211 |
| 538.319992 | 2903.155009 | 6.55202E-05 | 0.035270815 |
| 538.359992 | 2078.938691 | 4.69188E-05 | 0.025259178 |
| 538.399992 | 1327.601247 | 2.99621E-05 | 0.0161316   |
| 538.439992 | 789.482146  | 1.78175E-05 | 0.009593661 |
| 538.479992 | 481.15612   | 1.0859E-05  | 0.005847367 |
| 538.519992 | 379.49109   | 8.56459E-06 | 0.0046122   |
| 538.559992 | 389.272723  | 8.78534E-06 | 0.004731434 |
| 538.599992 | 441.93284   | 9.97381E-06 | 0.005371893 |
| 538.639992 | 500.117428  | 1.1287E-05  | 0.006079605 |
| 538.679992 | 509.762539  | 1.15046E-05 | 0.006197314 |
| 538.719992 | 480.347414  | 1.08408E-05 | 0.005840141 |
| 538.759992 | 443.569098  | 1.00107E-05 | 0.005393384 |
| 538.799992 | 395.234046  | 8.91988E-06 | 0.004806032 |
| 538.839992 | 388.545715  | 8.76894E-06 | 0.004725053 |
| 538.879992 | 423.620059  | 9.56051E-06 | 0.00515197  |
| 538.919992 | 561.364743  | 1.26692E-05 | 0.006827696 |
| 538.959992 | 906.442503  | 2.04571E-05 | 0.011025583 |
| 538.999992 | 1500.880481 | 3.38728E-05 | 0.018257429 |
| 539.039992 | 2300.298837 | 5.19145E-05 | 0.027984014 |
| 539.079992 | 3234.578502 | 7.29999E-05 | 0.039352802 |
| 539.119992 | 4026.422445 | 9.08707E-05 | 0.048990236 |
| 539.159992 | 4495.36686  | 0.000101454 | 0.054700029 |
| 539.199992 | 4579.794512 | 0.00010336  | 0.055731486 |
| 539.239992 | 4186.783731 | 9.44899E-05 | 0.050952721 |
| 539.279992 | 3472.324784 | 7.83655E-05 | 0.042260964 |
| 539.319992 | 2565.611989 | 5.79023E-05 | 0.031227862 |
| 539.359992 | 1744.652768 | 3.93744E-05 | 0.021236967 |
| 539.399992 | 1118.295978 | 2.52384E-05 | 0.013613583 |
| 539.439992 | 672.723868  | 1.51824E-05 | 0.008190016 |
| 539.479992 | 416.17      | 9.39238E-06 | 0.005067    |
| 539.519992 | 335.434815  | 7.5703E-06  | 0.004084326 |
| 539.559992 | 363.547291  | 8.20476E-06 | 0.004426958 |
| 539.599992 | 418.089138  | 9.43569E-06 | 0.005091498 |
| 539.639992 | 461.000951  | 1.04041E-05 | 0.005614495 |
| 539.679992 | 470.014264  | 1.06076E-05 | 0.005724692 |
| 539.719992 | 448.069655  | 1.01123E-05 | 0.005457815 |
| 539.759992 | 412.085334  | 9.30019E-06 | 0.005019872 |
| 539.799992 | 353.638459  | 7.98113E-06 | 0.004308213 |
| 539.839992 | 305.105895  | 6.88582E-06 | 0.003717238 |
| 539.879992 | 310.011128  | 6.99652E-06 | 0.003777281 |
| 539.919992 | 396.270872  | 8.94328E-06 | 0.004828657 |
| 539.959992 | 577.514885  | 1.30337E-05 | 0.00703768  |
| 539.999992 | 883.290968  | 1.99346E-05 | 0.010764709 |
| 540.039992 | 1384.399922 | 3.1244E-05  | 0.016872998 |
| 540.079992 | 2043.607669 | 4.61214E-05 | 0.024909234 |

|            |             |             |             |
|------------|-------------|-------------|-------------|
| 540.119992 | 2697.81989  | 6.0886E-05  | 0.032885766 |
| 540.159992 | 3066.682827 | 6.92108E-05 | 0.037384883 |
| 540.199992 | 3064.719072 | 6.91664E-05 | 0.037363711 |
| 540.239992 | 2801.764377 | 6.32319E-05 | 0.034160412 |
| 540.279992 | 2356.394759 | 5.31805E-05 | 0.028732386 |
| 540.319992 | 1804.413467 | 4.07231E-05 | 0.022003504 |
| 540.359992 | 1211.9963   | 2.73531E-05 | 0.014780504 |
| 540.399992 | 757.530941  | 1.70964E-05 | 0.009238904 |
| 540.439992 | 494.755899  | 1.1166E-05  | 0.006034527 |
| 540.479992 | 364.44827   | 8.22509E-06 | 0.004445496 |
| 540.519992 | 338.172345  | 7.63208E-06 | 0.004125291 |
| 540.559992 | 390.426344  | 8.81138E-06 | 0.004763079 |
| 540.599992 | 442.585641  | 9.98854E-06 | 0.005399805 |
| 540.639992 | 474.510712  | 1.0709E-05  | 0.005789738 |
| 540.679992 | 479.410522  | 1.08196E-05 | 0.005849956 |
| 540.719992 | 449.483183  | 1.01442E-05 | 0.005485177 |
| 540.759992 | 387.272182  | 8.74019E-06 | 0.004726347 |
| 540.799992 | 317.822278  | 7.17281E-06 | 0.003879053 |
| 540.839992 | 290.718447  | 6.56111E-06 | 0.003548511 |
| 540.879992 | 311.997034  | 7.04134E-06 | 0.003808519 |
| 540.919992 | 401.329034  | 9.05744E-06 | 0.004899349 |
| 540.959992 | 671.502617  | 1.51549E-05 | 0.008198183 |
| 540.999992 | 1175.244966 | 2.65236E-05 | 0.01434929  |
| 541.039992 | 1904.518428 | 4.29823E-05 | 0.023255158 |
| 541.079992 | 2764.966953 | 6.24015E-05 | 0.033764178 |
| 541.119992 | 3465.494581 | 7.82114E-05 | 0.042321744 |
| 541.159992 | 3980.973995 | 8.9845E-05  | 0.04862054  |
| 541.199992 | 4185.784372 | 9.44673E-05 | 0.051125714 |
| 541.239992 | 3894.575507 | 8.78951E-05 | 0.047572367 |
| 541.279992 | 3273.870156 | 7.38867E-05 | 0.039993387 |
| 541.319992 | 2434.958907 | 5.49536E-05 | 0.029747499 |
| 541.359992 | 1612.560267 | 3.63932E-05 | 0.019701844 |
| 541.399992 | 968.132617  | 2.18494E-05 | 0.011829268 |
| 541.439992 | 545.292899  | 1.23065E-05 | 0.006663232 |
| 541.479992 | 335.213766  | 7.56531E-06 | 0.004096463 |
| 541.519992 | 286.779751  | 6.47222E-06 | 0.003504836 |
| 541.559992 | 325.651779  | 7.34951E-06 | 0.003980199 |
| 541.599992 | 406.579156  | 9.17593E-06 | 0.004969681 |
| 541.639992 | 486.661413  | 1.09833E-05 | 0.005948978 |
| 541.679992 | 497.290664  | 1.12232E-05 | 0.00607936  |
| 541.719992 | 450.781294  | 1.01735E-05 | 0.005511192 |
| 541.759992 | 395.264796  | 8.92058E-06 | 0.004832811 |
| 541.799992 | 353.895242  | 7.98692E-06 | 0.004327315 |
| 541.839992 | 311.941015  | 7.04007E-06 | 0.003814594 |
| 541.879992 | 327.445109  | 7.38998E-06 | 0.004004482 |
| 541.919992 | 404.780278  | 9.13533E-06 | 0.004950616 |

|            |             |             |             |
|------------|-------------|-------------|-------------|
| 541.959992 | 546.084971  | 1.23244E-05 | 0.006679319 |
| 541.999992 | 854.480702  | 1.92844E-05 | 0.010452166 |
| 542.039992 | 1336.139562 | 3.01548E-05 | 0.016345112 |
| 542.079992 | 1974.732028 | 4.4567E-05  | 0.024158853 |
| 542.119992 | 2688.828033 | 6.06831E-05 | 0.032897524 |
| 542.159992 | 3180.465941 | 7.17787E-05 | 0.038915532 |
| 542.199992 | 3319.192779 | 7.49096E-05 | 0.040615962 |
| 542.239992 | 3150.744706 | 7.11079E-05 | 0.038557558 |
| 542.279992 | 2684.716105 | 6.05903E-05 | 0.032856909 |
| 542.319992 | 2046.082901 | 4.61772E-05 | 0.025042841 |
| 542.359992 | 1415.008712 | 3.19348E-05 | 0.017320145 |
| 542.399992 | 905.751427  | 2.04415E-05 | 0.011087496 |
| 542.439992 | 564.48098   | 1.27395E-05 | 0.006910441 |
| 542.479992 | 400.265061  | 9.03342E-06 | 0.004900452 |
| 542.519992 | 357.116224  | 8.05962E-06 | 0.004372503 |
| 542.559992 | 391.085773  | 8.82626E-06 | 0.004788776 |
| 542.599992 | 449.612368  | 1.01471E-05 | 0.00550583  |
| 542.639992 | 497.034843  | 1.12174E-05 | 0.006087001 |
| 542.679992 | 496.658761  | 1.12089E-05 | 0.006082844 |
| 542.719992 | 450.509007  | 1.01674E-05 | 0.00551803  |
| 542.759992 | 403.15958   | 9.09875E-06 | 0.004938438 |
| 542.799992 | 379.834349  | 8.57233E-06 | 0.004653062 |
| 542.839992 | 493.657189  | 1.11412E-05 | 0.006047865 |
| 542.879992 | 924.579339  | 2.08665E-05 | 0.011327988 |
| 542.919992 | 1813.001983 | 4.09169E-05 | 0.022214619 |
| 542.959992 | 3242.346342 | 7.31752E-05 | 0.039731228 |
| 542.999992 | 5071.043144 | 0.000114446 | 0.062144384 |
| 543.039992 | 6803.259366 | 0.00015354  | 0.083378408 |
| 543.079992 | 7931.808703 | 0.00017901  | 0.097216681 |
| 543.119992 | 8255.446425 | 0.000186314 | 0.101190819 |
| 543.159992 | 7850.723655 | 0.00017718  | 0.096237032 |
| 543.199992 | 7035.007051 | 0.00015877  | 0.086244031 |
| 543.239992 | 5993.68735  | 0.000135269 | 0.073483626 |
| 543.279992 | 4797.539609 | 0.000108274 | 0.058822982 |
| 543.319992 | 3579.197031 | 8.07775E-05 | 0.043888026 |
| 543.359992 | 2399.102393 | 5.41444E-05 | 0.0294199   |
| 543.399992 | 1428.653712 | 3.22427E-05 | 0.017520696 |
| 543.439992 | 820.772103  | 1.85237E-05 | 0.01006651  |
| 543.479992 | 504.165328  | 1.13783E-05 | 0.006183883 |
| 543.519992 | 396.577106  | 8.95019E-06 | 0.004864609 |
| 543.559992 | 413.597878  | 9.33433E-06 | 0.005073767 |
| 543.599992 | 479.614339  | 1.08242E-05 | 0.00588405  |
| 543.639992 | 543.410811  | 1.2264E-05  | 0.006667215 |
| 543.679992 | 555.85793   | 1.25449E-05 | 0.006820432 |
| 543.719992 | 510.441973  | 1.152E-05   | 0.006263635 |
| 543.759992 | 430.10444   | 9.70686E-06 | 0.005278201 |

|            |             |             |             |
|------------|-------------|-------------|-------------|
| 543.799992 | 347.021974  | 7.8318E-06  | 0.004258934 |
| 543.839992 | 317.388005  | 7.16301E-06 | 0.003895529 |
| 543.879992 | 416.199545  | 9.39304E-06 | 0.005108689 |
| 543.919992 | 658.490756  | 1.48612E-05 | 0.008083314 |
| 543.959992 | 1079.797996 | 2.43695E-05 | 0.013256053 |
| 543.999992 | 1671.992014 | 3.77345E-05 | 0.020527584 |
| 544.039992 | 2442.759121 | 5.51297E-05 | 0.029992746 |
| 544.079992 | 3218.299377 | 7.26325E-05 | 0.039517909 |
| 544.119992 | 3795.27937  | 8.56542E-05 | 0.046606146 |
| 544.159992 | 4059.018407 | 9.16064E-05 | 0.049848533 |
| 544.199992 | 3904.827175 | 8.81265E-05 | 0.047958446 |
| 544.239992 | 3550.202329 | 8.01231E-05 | 0.043606207 |
| 544.279992 | 2951.505411 | 6.66114E-05 | 0.036255234 |
| 544.319992 | 2179.49769  | 4.91882E-05 | 0.026774135 |
| 544.359992 | 1461.899226 | 3.2993E-05  | 0.017960085 |
| 544.399992 | 924.890453  | 2.08735E-05 | 0.011363527 |
| 544.439992 | 579.979303  | 1.30893E-05 | 0.007126352 |
| 544.479992 | 392.748409  | 8.86378E-06 | 0.004826153 |
| 544.519992 | 368.236989  | 8.3106E-06  | 0.004525286 |
| 544.559992 | 403.42256   | 9.10469E-06 | 0.004958047 |
| 544.599992 | 480.155404  | 1.08364E-05 | 0.005901524 |
| 544.639992 | 542.735685  | 1.22488E-05 | 0.00667118  |
| 544.679992 | 511.940956  | 1.15538E-05 | 0.006293121 |
| 544.719992 | 488.881535  | 1.10334E-05 | 0.0060101   |
| 544.759992 | 446.697241  | 1.00813E-05 | 0.005491908 |
| 544.799992 | 380.651237  | 8.59077E-06 | 0.00468025  |
| 544.839992 | 333.129284  | 7.51826E-06 | 0.004096251 |
| 544.879992 | 386.656776  | 8.7263E-06  | 0.004754789 |
| 544.919992 | 590.812373  | 1.33338E-05 | 0.007265861 |
| 544.959992 | 1094.355207 | 2.46981E-05 | 0.013459462 |
| 544.999992 | 1907.686787 | 4.30538E-05 | 0.023464339 |
| 545.039992 | 2938.56522  | 6.63193E-05 | 0.036146684 |
| 545.079992 | 4125.559794 | 9.31081E-05 | 0.050751383 |
| 545.119992 | 5088.356477 | 0.000114837 | 0.062600009 |
| 545.159992 | 5585.746903 | 0.000126063 | 0.068724246 |
| 545.199992 | 5596.78887  | 0.000126312 | 0.068865154 |
| 545.239992 | 5064.931508 | 0.000114308 | 0.062325538 |
| 545.279992 | 4107.438793 | 9.26992E-05 | 0.050547004 |
| 545.319992 | 2990.712785 | 6.74962E-05 | 0.036807039 |
| 545.359992 | 1953.082479 | 4.40784E-05 | 0.024038569 |
| 545.399992 | 1169.45784  | 2.6393E-05  | 0.014394761 |
| 545.439992 | 696.820917  | 1.57263E-05 | 0.008577741 |
| 545.479992 | 441.526477  | 9.96464E-06 | 0.00543551  |
| 545.519992 | 332.057114  | 7.49407E-06 | 0.004088163 |
| 545.559992 | 340.766251  | 7.69062E-06 | 0.004195694 |
| 545.599992 | 402.512581  | 9.08415E-06 | 0.004956311 |



|            |             |             |             |
|------------|-------------|-------------|-------------|
| 545.639992 | 440.415419  | 9.93956E-06 | 0.005423423 |
| 545.679992 | 434.13851   | 9.7979E-06  | 0.005346519 |
| 545.719992 | 395.592955  | 8.92798E-06 | 0.004872178 |
| 545.759992 | 336.225255  | 7.58814E-06 | 0.004141301 |
| 545.799992 | 283.584054  | 6.4001E-06  | 0.003493173 |
| 545.839992 | 267.914893  | 6.04647E-06 | 0.003300403 |
| 545.879992 | 290.847183  | 6.56402E-06 | 0.003583165 |
| 545.919992 | 367.622835  | 8.29674E-06 | 0.004529354 |
| 545.959992 | 569.144879  | 1.28448E-05 | 0.007012751 |
| 545.999992 | 1013.568639 | 2.28748E-05 | 0.012489658 |
| 546.039992 | 1697.510921 | 3.83105E-05 | 0.020919042 |
| 546.079992 | 2586.195063 | 5.83668E-05 | 0.031872953 |
| 546.119992 | 3600.957965 | 8.12686E-05 | 0.04438241  |
| 546.159992 | 4384.214421 | 9.89456E-05 | 0.054040135 |
| 546.199992 | 4759.770043 | 0.000107421 | 0.058673557 |
| 546.239992 | 4708.49373  | 0.000106264 | 0.058045726 |
| 546.279992 | 4072.282964 | 9.19058E-05 | 0.050206275 |
| 546.319992 | 3048.399162 | 6.87981E-05 | 0.03758579  |
| 546.359992 | 1995.43951  | 4.50343E-05 | 0.024604935 |
| 546.399992 | 1160.166276 | 2.61833E-05 | 0.014306575 |
| 546.439992 | 644.996104  | 1.45567E-05 | 0.007954343 |
| 546.479992 | 400.060381  | 9.02881E-06 | 0.004934062 |
| 546.519992 | 341.178254  | 7.69992E-06 | 0.004208159 |
| 546.559992 | 370.031262  | 8.35109E-06 | 0.004564372 |
| 546.599992 | 415.534456  | 9.37803E-06 | 0.005126033 |
| 546.639992 | 465.218906  | 1.04993E-05 | 0.005739361 |
| 546.679992 | 480.685533  | 1.08484E-05 | 0.005930605 |
| 546.719992 | 460.871083  | 1.04012E-05 | 0.005686554 |
| 546.759992 | 413.185501  | 9.32502E-06 | 0.005098549 |
| 546.799992 | 340.784056  | 7.69102E-06 | 0.00420545  |
| 546.839992 | 301.089734  | 6.79518E-06 | 0.003715874 |
| 546.879992 | 358.174742  | 8.08351E-06 | 0.004420707 |
| 546.919992 | 513.043247  | 1.15787E-05 | 0.006332607 |
| 546.959992 | 862.672671  | 1.94693E-05 | 0.010648939 |
| 546.999992 | 1530.827625 | 3.45486E-05 | 0.01889811  |
| 547.039992 | 2448.58468  | 5.52611E-05 | 0.030230057 |
| 547.079992 | 3464.2279   | 7.81828E-05 | 0.042772245 |
| 547.119992 | 4419.963236 | 9.97524E-05 | 0.05457654  |
| 547.159992 | 5163.859198 | 0.000116541 | 0.063766633 |
| 547.199992 | 5466.491927 | 0.000123371 | 0.06750867  |
| 547.239992 | 5197.2721   | 0.000117295 | 0.06418862  |
| 547.279992 | 4336.182017 | 9.78616E-05 | 0.053557689 |
| 547.319992 | 3269.664716 | 7.37918E-05 | 0.040387716 |
| 547.359992 | 2245.510615 | 5.0678E-05  | 0.027739135 |
| 547.399992 | 1322.136329 | 2.98388E-05 | 0.016333745 |
| 547.439992 | 682.07098   | 1.53934E-05 | 0.008426958 |

|            |             |             |             |
|------------|-------------|-------------|-------------|
| 547.479992 | 400.574722  | 9.04041E-06 | 0.004949446 |
| 547.519992 | 356.58571   | 8.04764E-06 | 0.004406245 |
| 547.559992 | 381.363826  | 8.60685E-06 | 0.004712767 |
| 547.599992 | 423.659826  | 9.56141E-06 | 0.005235829 |
| 547.639992 | 458.59026   | 1.03497E-05 | 0.005667933 |
| 547.679992 | 457.939316  | 1.03351E-05 | 0.005660301 |
| 547.719992 | 419.827982  | 9.47493E-06 | 0.00518961  |
| 547.759992 | 350.192756  | 7.90336E-06 | 0.004329146 |
| 547.799992 | 287.606569  | 6.49088E-06 | 0.003555704 |
| 547.839992 | 254.486767  | 5.74341E-06 | 0.003146471 |
| 547.879992 | 309.650997  | 6.98839E-06 | 0.0038288   |
| 547.919992 | 388.8637    | 8.77611E-06 | 0.004808607 |
| 547.959992 | 536.07608   | 1.20985E-05 | 0.006629489 |
| 547.999992 | 800.995504  | 1.80774E-05 | 0.009906389 |
| 548.039992 | 1298.977895 | 2.93161E-05 | 0.016066407 |
| 548.079992 | 2085.894295 | 4.70757E-05 | 0.025801265 |
| 548.119992 | 2969.144577 | 6.70095E-05 | 0.036729223 |
| 548.159992 | 3729.713394 | 8.41744E-05 | 0.046141058 |
| 548.199992 | 4234.533926 | 9.55675E-05 | 0.052390121 |
| 548.239992 | 4126.631836 | 9.31323E-05 | 0.051058869 |
| 548.279992 | 3585.664774 | 8.09235E-05 | 0.044368714 |
| 548.319992 | 2823.261661 | 6.37171E-05 | 0.034937351 |
| 548.359992 | 1984.597282 | 4.47896E-05 | 0.024560823 |
| 548.399992 | 1244.643317 | 2.80899E-05 | 0.015404482 |
| 548.439992 | 736.133941  | 1.66135E-05 | 0.009111518 |
| 548.479992 | 479.422958  | 1.08199E-05 | 0.005934503 |
| 548.519992 | 405.762909  | 9.1575E-06  | 0.005023074 |
| 548.559992 | 404.46295   | 9.12817E-06 | 0.005007346 |
| 548.599992 | 446.995563  | 1.00881E-05 | 0.005534314 |
| 548.639992 | 486.587721  | 1.09816E-05 | 0.006024949 |
| 548.679992 | 487.579896  | 1.1004E-05  | 0.006037674 |
| 548.719992 | 447.449031  | 1.00983E-05 | 0.00554114  |
| 548.759992 | 399.941744  | 9.02613E-06 | 0.004953178 |
| 548.799992 | 386.520176  | 8.72322E-06 | 0.004787304 |
| 548.839992 | 400.756338  | 9.04451E-06 | 0.00496399  |
| 548.879992 | 434.010317  | 9.79501E-06 | 0.005376284 |
| 548.919992 | 584.365793  | 1.31883E-05 | 0.007239334 |
| 548.959992 | 933.878163  | 2.10763E-05 | 0.011570062 |
| 548.999992 | 1625.632615 | 3.66883E-05 | 0.020141857 |
| 549.039992 | 2617.309143 | 5.9069E-05  | 0.032431255 |
| 549.079992 | 3773.556258 | 8.51639E-05 | 0.046761798 |
| 549.119992 | 4930.794124 | 0.000111281 | 0.061106707 |
| 549.159992 | 5614.142898 | 0.000126703 | 0.06958043  |
| 549.199992 | 5764.071398 | 0.000130087 | 0.071443814 |
| 549.239992 | 5307.056822 | 0.000119773 | 0.065784056 |
| 549.279992 | 4332.898257 | 9.77875E-05 | 0.053712705 |

|            |             |             |             |
|------------|-------------|-------------|-------------|
| 549.319992 | 3166.199178 | 7.14567E-05 | 0.039252597 |
| 549.359992 | 2027.57374  | 4.57595E-05 | 0.025138447 |
| 549.399992 | 1179.67539  | 2.66236E-05 | 0.014627022 |
| 549.439992 | 680.575079  | 1.53596E-05 | 0.008439196 |
| 549.479992 | 436.663967  | 9.8549E-06  | 0.005415069 |
| 549.519992 | 361.061385  | 8.14865E-06 | 0.004477847 |
| 549.559992 | 373.369558  | 8.42643E-06 | 0.004630829 |
| 549.599992 | 428.624264  | 9.67345E-06 | 0.005316529 |
| 549.639992 | 495.405507  | 1.11806E-05 | 0.006145312 |
| 549.679992 | 508.232361  | 1.14701E-05 | 0.006304883 |
| 549.719992 | 454.743424  | 1.02629E-05 | 0.005641735 |
| 549.759992 | 400.486863  | 9.03843E-06 | 0.004968968 |
| 549.799992 | 338.649911  | 7.64286E-06 | 0.004202043 |
| 549.839992 | 294.533127  | 6.6472E-06  | 0.003654898 |
| 549.879992 | 308.369415  | 6.95947E-06 | 0.003826872 |
| 549.919992 | 388.42649   | 8.76624E-06 | 0.004820733 |
| 549.959992 | 551.450724  | 1.24455E-05 | 0.006844513 |
| 549.999992 | 839.307093  | 1.8942E-05  | 0.010418095 |
| 550.039992 | 1328.46343  | 2.99816E-05 | 0.016491062 |
| 550.079992 | 1972.289861 | 4.45118E-05 | 0.02448507  |
| 550.119992 | 2579.819195 | 5.82229E-05 | 0.032029595 |
| 550.159992 | 3100.561301 | 6.99753E-05 | 0.038497638 |
| 550.199992 | 3308.775135 | 7.46744E-05 | 0.04108588  |
| 550.239992 | 3119.170849 | 7.03953E-05 | 0.038734332 |
| 550.279992 | 2668.967513 | 6.02349E-05 | 0.033146049 |
| 550.319992 | 2038.610701 | 4.60086E-05 | 0.025319455 |
| 550.359992 | 1404.254026 | 3.16921E-05 | 0.01744204  |
| 550.399992 | 907.369713  | 2.04781E-05 | 0.01127113  |
| 550.439992 | 571.002054  | 1.28867E-05 | 0.007093367 |
| 550.479992 | 394.252556  | 8.89773E-06 | 0.004898023 |
| 550.519992 | 351.862083  | 7.94104E-06 | 0.0043717   |
| 550.559992 | 401.293057  | 9.05663E-06 | 0.004986216 |
| 550.599992 | 463.93678   | 1.04704E-05 | 0.005765006 |
| 550.639992 | 476.313829  | 1.07497E-05 | 0.005919237 |
| 550.679992 | 469.088526  | 1.05867E-05 | 0.00582987  |
| 550.719992 | 445.727656  | 1.00595E-05 | 0.005539942 |
| 550.759992 | 400.169543  | 9.03127E-06 | 0.004974062 |
| 550.799992 | 347.42888   | 7.84099E-06 | 0.004318815 |
| 550.839992 | 361.995786  | 8.16974E-06 | 0.00450022  |
| 550.879992 | 495.218114  | 1.11764E-05 | 0.006156846 |
| 550.919992 | 787.174736  | 1.77654E-05 | 0.009787335 |
| 550.959992 | 1297.654014 | 2.92862E-05 | 0.016135549 |
| 550.999992 | 1998.546452 | 4.51044E-05 | 0.024852529 |
| 551.039992 | 2758.581502 | 6.22573E-05 | 0.034306285 |
| 551.079992 | 3484.282555 | 7.86354E-05 | 0.043334398 |
| 551.119992 | 4055.356996 | 9.15238E-05 | 0.050440573 |

|            |             |             |             |
|------------|-------------|-------------|-------------|
| 551.159992 | 4428.559275 | 9.99464E-05 | 0.055086465 |
| 551.199992 | 4455.158493 | 0.000100547 | 0.055421352 |
| 551.239992 | 4007.961746 | 9.04541E-05 | 0.049861925 |
| 551.279992 | 3237.312819 | 7.30616E-05 | 0.040277421 |
| 551.319992 | 2372.449119 | 5.35429E-05 | 0.029519256 |
| 551.359992 | 1584.174276 | 3.57526E-05 | 0.019712557 |
| 551.399992 | 984.353125  | 2.22155E-05 | 0.012249615 |
| 551.439992 | 590.239424  | 1.33209E-05 | 0.007345667 |
| 551.479992 | 386.158482  | 8.71506E-06 | 0.004806181 |
| 551.519992 | 330.751359  | 7.4646E-06  | 0.004116875 |
| 551.559992 | 346.792198  | 7.82662E-06 | 0.004316849 |
| 551.599992 | 413.645747  | 9.33541E-06 | 0.005149411 |
| 551.639992 | 477.427106  | 1.07749E-05 | 0.005943846 |
| 551.679992 | 479.226251  | 1.08155E-05 | 0.005966678 |
| 551.719992 | 435.363808  | 9.82555E-06 | 0.005420955 |
| 551.759992 | 376.964233  | 8.50756E-06 | 0.00469413  |
| 551.799992 | 323.746182  | 7.3065E-06  | 0.004031727 |
| 551.839992 | 287.397034  | 6.48615E-06 | 0.003579317 |
| 551.879992 | 292.18133   | 6.59413E-06 | 0.003639166 |
| 551.919992 | 364.250591  | 8.22063E-06 | 0.004537129 |
| 551.959992 | 544.911294  | 1.22979E-05 | 0.006787943 |
| 551.999992 | 836.158589  | 1.88709E-05 | 0.010416756 |
| 552.039992 | 1242.342026 | 2.80379E-05 | 0.015478058 |
| 552.079992 | 1792.75399  | 4.046E-05   | 0.022337135 |
| 552.119992 | 2342.268592 | 5.28617E-05 | 0.029186023 |
| 552.159992 | 2746.828953 | 6.19921E-05 | 0.034229559 |
| 552.199992 | 2880.296681 | 6.50043E-05 | 0.035895365 |
| 552.239992 | 2771.703304 | 6.25535E-05 | 0.034544535 |
| 552.279992 | 2443.441575 | 5.51451E-05 | 0.03045552  |
| 552.319992 | 1926.713781 | 4.34832E-05 | 0.024016666 |
| 552.359992 | 1365.887874 | 3.08262E-05 | 0.017027152 |
| 552.399992 | 883.813081  | 1.99464E-05 | 0.011018408 |
| 552.439992 | 574.843549  | 1.29734E-05 | 0.007167035 |
| 552.479992 | 414.042357  | 9.34436E-06 | 0.005162572 |
| 552.519992 | 355.68012   | 8.0272E-06  | 0.004435191 |
| 552.559992 | 377.285414  | 8.51481E-06 | 0.004704941 |
| 552.599992 | 424.06897   | 9.57065E-06 | 0.005288739 |
| 552.639992 | 454.621916  | 1.02602E-05 | 0.005670188 |
| 552.679992 | 470.853569  | 1.06265E-05 | 0.005873059 |
| 552.719992 | 459.827027  | 1.03777E-05 | 0.005735938 |
| 552.759992 | 411.897218  | 9.29595E-06 | 0.005138427 |
| 552.799992 | 374.274019  | 8.44684E-06 | 0.004669415 |
| 552.839992 | 411.638375  | 9.2901E-06  | 0.005135941 |
| 552.879992 | 519.316958  | 1.17203E-05 | 0.006479897 |
| 552.919992 | 750.52053   | 1.69382E-05 | 0.009365471 |
| 552.959992 | 1141.194621 | 2.57552E-05 | 0.01424158  |

|            |             |             |             |
|------------|-------------|-------------|-------------|
| 552.999992 | 1726.315183 | 3.89605E-05 | 0.021545172 |
| 553.039992 | 2445.934883 | 5.52013E-05 | 0.030528551 |
| 553.079992 | 3106.927467 | 7.0119E-05  | 0.03878143  |
| 553.119992 | 3595.815797 | 8.11526E-05 | 0.0448871   |
| 553.159992 | 3895.291548 | 8.79113E-05 | 0.048629017 |
| 553.199992 | 3934.233878 | 8.87902E-05 | 0.049118726 |
| 553.239992 | 3689.944677 | 8.32769E-05 | 0.046072118 |
| 553.279992 | 3061.602851 | 6.90961E-05 | 0.038229496 |
| 553.319992 | 2205.188103 | 4.9768E-05  | 0.027537643 |
| 553.359992 | 1474.799098 | 3.32842E-05 | 0.018418123 |
| 553.399992 | 947.984097  | 2.13947E-05 | 0.011839816 |
| 553.439992 | 575.410528  | 1.29862E-05 | 0.00718709  |
| 553.479992 | 382.572015  | 8.63412E-06 | 0.004778811 |
| 553.519992 | 345.196453  | 7.7906E-06  | 0.004312255 |
| 553.559992 | 369.490077  | 8.33888E-06 | 0.004616068 |
| 553.599992 | 422.728843  | 9.5404E-06  | 0.005281566 |
| 553.639992 | 434.324326  | 9.8021E-06  | 0.005426832 |
| 553.679992 | 437.044337  | 9.86348E-06 | 0.005461213 |
| 553.719992 | 405.977793  | 9.16235E-06 | 0.005073378 |
| 553.759992 | 362.632158  | 8.1841E-06  | 0.004532029 |
| 553.799992 | 330.416999  | 7.45705E-06 | 0.004129715 |
| 553.839992 | 317.464818  | 7.16474E-06 | 0.003968119 |
| 553.879992 | 346.315269  | 7.81585E-06 | 0.004329045 |
| 553.919992 | 442.133012  | 9.97833E-06 | 0.005527194 |
| 553.959992 | 589.691424  | 1.33085E-05 | 0.007372384 |
| 553.999992 | 842.432849  | 1.90125E-05 | 0.010532945 |
| 554.039992 | 1265.678497 | 2.85646E-05 | 0.015825931 |
| 554.079992 | 1833.296051 | 4.13749E-05 | 0.022925025 |
| 554.119992 | 2399.560959 | 5.41547E-05 | 0.030008229 |
| 554.159992 | 2810.714106 | 6.34339E-05 | 0.035152531 |
| 554.199992 | 3005.488076 | 6.78297E-05 | 0.037591208 |
| 554.239992 | 2893.307689 | 6.52979E-05 | 0.036190721 |
| 554.279992 | 2534.133682 | 5.71919E-05 | 0.031700308 |
| 554.319992 | 1997.980006 | 4.50916E-05 | 0.02499519  |
| 554.359992 | 1414.734465 | 3.19286E-05 | 0.017699931 |
| 554.399992 | 915.53969   | 2.06625E-05 | 0.011455265 |
| 554.439992 | 595.170552  | 1.34322E-05 | 0.007447332 |
| 554.479992 | 411.32474   | 9.28303E-06 | 0.005147252 |
| 554.519992 | 347.255291  | 7.83707E-06 | 0.004345811 |
| 554.559992 | 357.870425  | 8.07664E-06 | 0.00447898  |
| 554.599992 | 403.177317  | 9.09915E-06 | 0.005046389 |
| 554.639992 | 459.324924  | 1.03663E-05 | 0.005749578 |
| 554.679992 | 501.281233  | 1.13132E-05 | 0.006275216 |
| 554.719992 | 461.006154  | 1.04043E-05 | 0.005771455 |
| 554.759992 | 391.677588  | 8.83962E-06 | 0.004903866 |
| 554.799992 | 334.709087  | 7.55392E-06 | 0.004190914 |

|            |             |             |             |
|------------|-------------|-------------|-------------|
| 554.839992 | 341.768001  | 7.71323E-06 | 0.004279607 |
| 554.879992 | 398.97864   | 9.00439E-06 | 0.004996357 |
| 554.919992 | 520.255487  | 1.17414E-05 | 0.006515561 |
| 554.959992 | 774.237714  | 1.74735E-05 | 0.009697075 |
| 554.999992 | 1224.503754 | 2.76353E-05 | 0.015337616 |
| 555.039992 | 1916.352191 | 4.32494E-05 | 0.024005146 |
| 555.079992 | 2695.034101 | 6.08232E-05 | 0.033761722 |
| 555.119992 | 3323.788553 | 7.50133E-05 | 0.04164137  |
| 555.159992 | 3702.15818  | 8.35526E-05 | 0.046385035 |
| 555.199992 | 3693.007873 | 8.3346E-05  | 0.046273723 |
| 555.239992 | 3385.110888 | 7.63972E-05 | 0.042418802 |
| 555.279992 | 2774.000342 | 6.26053E-05 | 0.034763484 |
| 555.319992 | 2040.077684 | 4.60417E-05 | 0.025567883 |
| 555.359992 | 1413.613242 | 3.19033E-05 | 0.017717806 |
| 555.399992 | 906.084331  | 2.04491E-05 | 0.011357408 |
| 555.439992 | 545.135658  | 1.2303E-05  | 0.006833552 |
| 555.479992 | 364.75614   | 8.23204E-06 | 0.004572732 |
| 555.519992 | 316.347092  | 7.13951E-06 | 0.003966142 |
| 555.559992 | 356.32915   | 8.04185E-06 | 0.004467732 |
| 555.599992 | 438.767596  | 9.90237E-06 | 0.005501759 |
| 555.639992 | 481.959521  | 1.08772E-05 | 0.006043782 |
| 555.679992 | 466.388593  | 1.05257E-05 | 0.005848944 |
| 555.719992 | 449.764514  | 1.01506E-05 | 0.005640868 |
| 555.759992 | 408.817507  | 9.22644E-06 | 0.005127687 |
| 555.799992 | 343.32148   | 7.74829E-06 | 0.004306498 |
| 555.839992 | 291.702649  | 6.58332E-06 | 0.003659274 |
| 555.879992 | 301.822026  | 6.8117E-06  | 0.003786489 |
| 555.919992 | 381.711034  | 8.61469E-06 | 0.004789076 |
| 555.959992 | 574.118727  | 1.29571E-05 | 0.007203607 |
| 555.999992 | 984.221693  | 2.22125E-05 | 0.012350157 |
| 556.039992 | 1735.918288 | 3.91773E-05 | 0.021784122 |
| 556.079992 | 2943.728534 | 6.64359E-05 | 0.036943648 |
| 556.119992 | 4675.229722 | 0.000105513 | 0.058678124 |
| 556.159992 | 6904.898559 | 0.000155834 | 0.086668604 |
| 556.199992 | 9088.20687  | 0.000205108 | 0.114081163 |
| 556.239992 | 10300.20424 | 0.000232461 | 0.129304251 |
| 556.279992 | 9849.260498 | 0.000222284 | 0.123652192 |
| 556.319992 | 7913.680347 | 0.000178601 | 0.099359164 |
| 556.359992 | 5371.619816 | 0.00012123  | 0.067447509 |
| 556.399992 | 3091.313246 | 6.97666E-05 | 0.038818155 |
| 556.439992 | 1552.336579 | 3.50341E-05 | 0.01949436  |
| 556.479992 | 766.017938  | 1.7288E-05  | 0.009620403 |
| 556.519992 | 494.549529  | 1.11613E-05 | 0.006211483 |
| 556.559992 | 439.612718  | 9.92145E-06 | 0.00552188  |
| 556.599992 | 474.249212  | 1.07031E-05 | 0.00595737  |
| 556.639992 | 466.451599  | 1.05272E-05 | 0.00585984  |

|            |             |             |             |
|------------|-------------|-------------|-------------|
| 556.679992 | 442.750059  | 9.99225E-06 | 0.005562487 |
| 556.719992 | 450.241439  | 1.01613E-05 | 0.005657011 |
| 556.759992 | 429.818992  | 9.70042E-06 | 0.005400804 |
| 556.799992 | 367.308439  | 8.28964E-06 | 0.004615671 |
| 556.839992 | 312.247554  | 7.04699E-06 | 0.003924047 |
| 556.879992 | 335.066578  | 7.56199E-06 | 0.004211119 |
| 556.919992 | 473.280185  | 1.06813E-05 | 0.005948615 |
| 556.959992 | 781.308679  | 1.7633E-05  | 0.009820903 |
| 556.999992 | 1314.306099 | 2.96621E-05 | 0.016521766 |
| 557.039992 | 2117.921593 | 4.77985E-05 | 0.026625699 |
| 557.079992 | 3079.276907 | 6.9495E-05  | 0.038714269 |
| 557.119992 | 4068.572714 | 9.1822E-05  | 0.051155883 |
| 557.159992 | 4996.481499 | 0.000112764 | 0.062827382 |
| 557.199992 | 5716.308579 | 0.000129009 | 0.071883882 |
| 557.239992 | 5862.476498 | 0.000132308 | 0.073727269 |
| 557.279992 | 5293.805515 | 0.000119474 | 0.066580368 |
| 557.319992 | 4130.480431 | 9.32192E-05 | 0.051952918 |
| 557.359992 | 2750.263942 | 6.20696E-05 | 0.034595126 |
| 557.399992 | 1611.126571 | 3.63609E-05 | 0.020267556 |
| 557.439992 | 898.394751  | 2.02755E-05 | 0.011302385 |
| 557.479992 | 548.205665  | 1.23722E-05 | 0.006897275 |
| 557.519992 | 420.275483  | 9.48503E-06 | 0.005288095 |
| 557.559992 | 397.19658   | 8.96417E-06 | 0.004998065 |
| 557.599992 | 414.968106  | 9.36525E-06 | 0.005222065 |
| 557.639992 | 469.197441  | 1.05891E-05 | 0.005904924 |
| 557.679992 | 499.326119  | 1.12691E-05 | 0.006284549 |
| 557.719992 | 467.216885  | 1.05444E-05 | 0.005880842 |
| 557.759992 | 429.273954  | 9.68812E-06 | 0.005403643 |
| 557.799992 | 368.325148  | 8.31259E-06 | 0.00463676  |
| 557.839992 | 331.568558  | 7.48304E-06 | 0.004174339 |
| 557.879992 | 335.381388  | 7.56909E-06 | 0.004222644 |
| 557.919992 | 372.314158  | 8.40261E-06 | 0.004687985 |
| 557.959992 | 491.878109  | 1.1101E-05  | 0.006193916 |
| 557.999992 | 762.67101   | 1.72124E-05 | 0.009604532 |
| 558.039992 | 1276.865566 | 2.88171E-05 | 0.016081082 |
| 558.079992 | 1945.847555 | 4.39151E-05 | 0.024508121 |
| 558.119992 | 2637.728464 | 5.95299E-05 | 0.033224804 |
| 558.159992 | 3238.426735 | 7.30868E-05 | 0.040794117 |
| 558.199992 | 3536.007618 | 7.98028E-05 | 0.044545904 |
| 558.239992 | 3424.706384 | 7.72909E-05 | 0.043146845 |
| 558.279992 | 2923.792372 | 6.59859E-05 | 0.03683862  |
| 558.319992 | 2250.77211  | 5.07968E-05 | 0.028360864 |
| 558.359992 | 1539.062349 | 3.47345E-05 | 0.019394352 |
| 558.399992 | 954.138024  | 2.15336E-05 | 0.012024343 |
| 558.439992 | 582.612184  | 1.31487E-05 | 0.007342785 |
| 558.479992 | 392.126404  | 8.84975E-06 | 0.004942406 |

|            |             |             |             |
|------------|-------------|-------------|-------------|
| 558.519992 | 351.240249  | 7.927E-06   | 0.00442739  |
| 558.559992 | 385.794073  | 8.70683E-06 | 0.00486329  |
| 558.599992 | 435.39131   | 9.82618E-06 | 0.005488902 |
| 558.639992 | 490.735268  | 1.10752E-05 | 0.006187056 |
| 558.679992 | 515.025306  | 1.16234E-05 | 0.006493763 |
| 558.719992 | 481.417195  | 1.08649E-05 | 0.006070446 |
| 558.759992 | 399.872432  | 9.02456E-06 | 0.005042565 |
| 558.799992 | 324.882518  | 7.33215E-06 | 0.004097203 |
| 558.839992 | 308.633879  | 6.96544E-06 | 0.003892565 |
| 558.879992 | 365.884965  | 8.25751E-06 | 0.004614959 |
| 558.919992 | 534.941282  | 1.20729E-05 | 0.006747774 |
| 558.959992 | 864.271302  | 1.95054E-05 | 0.010902738 |
| 558.999992 | 1438.383277 | 3.24623E-05 | 0.018146429 |
| 559.039992 | 2255.927326 | 5.09131E-05 | 0.02846248  |
| 559.079992 | 3296.733085 | 7.44027E-05 | 0.041597046 |
| 559.119992 | 4535.958112 | 0.00010237  | 0.057237257 |
| 559.159992 | 5663.505525 | 0.000127817 | 0.071470394 |
| 559.199992 | 6278.381123 | 0.000141694 | 0.079235461 |
| 559.239992 | 6155.090647 | 0.000138912 | 0.077685047 |
| 559.279992 | 5320.34585  | 0.000120073 | 0.067154312 |
| 559.319992 | 4040.417651 | 9.11866E-05 | 0.051002488 |
| 559.359992 | 2703.522062 | 6.10147E-05 | 0.034129197 |
| 559.399992 | 1599.559037 | 3.60998E-05 | 0.020194239 |
| 559.439992 | 860.257463  | 1.94148E-05 | 0.010861423 |
| 559.479992 | 487.695552  | 1.10066E-05 | 0.006157978 |
| 559.519992 | 348.782127  | 7.87153E-06 | 0.004404277 |
| 559.559992 | 332.767646  | 7.5101E-06  | 0.004202353 |
| 559.599992 | 369.145926  | 8.33111E-06 | 0.004662089 |
| 559.639992 | 417.884423  | 9.43107E-06 | 0.005278004 |
| 559.679992 | 450.034931  | 1.01567E-05 | 0.00568448  |
| 559.719992 | 435.374164  | 9.82579E-06 | 0.00549969  |
| 559.759992 | 373.89397   | 8.43827E-06 | 0.004723404 |
| 559.799992 | 318.978634  | 7.1989E-06  | 0.004029946 |
| 559.839992 | 305.335038  | 6.89099E-06 | 0.00385785  |
| 559.879992 | 334.584028  | 7.5511E-06  | 0.004227707 |
| 559.919992 | 423.158774  | 9.5501E-06  | 0.005347294 |
| 559.959992 | 613.780787  | 1.38522E-05 | 0.007756665 |
| 559.999992 | 937.344905  | 2.11546E-05 | 0.011846558 |
| 560.039992 | 1457.594252 | 3.28959E-05 | 0.018423004 |
| 560.079992 | 2097.284558 | 4.73328E-05 | 0.026510149 |
| 560.119992 | 2756.903091 | 6.22195E-05 | 0.034850365 |
| 560.159992 | 3290.450664 | 7.42609E-05 | 0.041597979 |
| 560.199992 | 3552.511395 | 8.01752E-05 | 0.044914165 |
| 560.239992 | 3476.147592 | 7.84518E-05 | 0.043951841 |
| 560.279992 | 2998.772211 | 6.76781E-05 | 0.037918692 |
| 560.319992 | 2251.035942 | 5.08027E-05 | 0.028465794 |



|            |             |             |             |
|------------|-------------|-------------|-------------|
| 560.359992 | 1515.813649 | 3.42098E-05 | 0.019169805 |
| 560.399992 | 984.270109  | 2.22136E-05 | 0.012448504 |
| 560.439992 | 635.909232  | 1.43516E-05 | 0.008043203 |
| 560.479992 | 428.973836  | 9.68134E-06 | 0.005426198 |
| 560.519992 | 329.129222  | 7.42799E-06 | 0.004163536 |
| 560.559992 | 334.003826  | 7.538E-06   | 0.004225502 |
| 560.599992 | 392.124661  | 8.84971E-06 | 0.004961146 |
| 560.639992 | 438.704483  | 9.90095E-06 | 0.005550868 |
| 560.679992 | 418.951043  | 9.45514E-06 | 0.005301309 |
| 560.719992 | 396.857022  | 8.95651E-06 | 0.005022094 |
| 560.759992 | 372.051777  | 8.39669E-06 | 0.004708528 |
| 560.799992 | 348.983462  | 7.87607E-06 | 0.0044169   |
| 560.839992 | 340.644309  | 7.68787E-06 | 0.004311664 |
| 560.879992 | 394.604779  | 8.90568E-06 | 0.004995018 |
| 560.919992 | 612.42555   | 1.38216E-05 | 0.007752807 |
| 560.959992 | 1045.658578 | 2.35991E-05 | 0.013238127 |
| 560.999992 | 1807.500854 | 4.07928E-05 | 0.022884747 |
| 561.039992 | 2874.822384 | 6.48807E-05 | 0.036400688 |
| 561.079992 | 3940.812901 | 8.89387E-05 | 0.049901702 |
| 561.119992 | 4822.730659 | 0.000108842 | 0.061073598 |
| 561.159992 | 5296.775403 | 0.000119541 | 0.067081539 |
| 561.199992 | 5239.217268 | 0.000118242 | 0.066357317 |
| 561.239992 | 4713.906054 | 0.000106386 | 0.059708243 |
| 561.279992 | 3760.999216 | 8.48805E-05 | 0.047641734 |
| 561.319992 | 2685.793557 | 6.06146E-05 | 0.034024198 |
| 561.359992 | 1748.637267 | 3.94643E-05 | 0.022153683 |
| 561.399992 | 1081.636163 | 2.4411E-05  | 0.013704347 |
| 561.439992 | 649.15724   | 1.46506E-05 | 0.008225419 |
| 561.479992 | 406.571955  | 9.17576E-06 | 0.005152007 |
| 561.519992 | 340.975253  | 7.69534E-06 | 0.004321085 |
| 561.559992 | 385.204168  | 8.69352E-06 | 0.004881934 |
| 561.599992 | 421.968216  | 9.52323E-06 | 0.005348249 |
| 561.639992 | 451.498881  | 1.01897E-05 | 0.005722944 |
| 561.679992 | 450.120823  | 1.01586E-05 | 0.005705882 |
| 561.719992 | 419.850197  | 9.47543E-06 | 0.005322541 |
| 561.759992 | 362.031876  | 8.17056E-06 | 0.004589891 |
| 561.799992 | 319.942509  | 7.22066E-06 | 0.004056565 |
| 561.839992 | 308.248794  | 6.95675E-06 | 0.003908578 |
| 561.879992 | 330.606633  | 7.46133E-06 | 0.004192373 |
| 561.919992 | 402.013604  | 9.07289E-06 | 0.005098237 |
| 561.959992 | 574.757656  | 1.29715E-05 | 0.007289453 |
| 561.999992 | 904.570981  | 2.04149E-05 | 0.011473178 |
| 562.039992 | 1471.66689  | 3.32135E-05 | 0.018667299 |
| 562.079992 | 2244.29958  | 5.06507E-05 | 0.028469754 |
| 562.119992 | 2886.655463 | 6.51478E-05 | 0.036620877 |
| 562.159992 | 3214.27232  | 7.25416E-05 | 0.040780013 |

|            |             |             |             |
|------------|-------------|-------------|-------------|
| 562.199992 | 3256.774257 | 7.35009E-05 | 0.041322182 |
| 562.239992 | 3011.292972 | 6.79607E-05 | 0.038210217 |
| 562.279992 | 2472.842275 | 5.58086E-05 | 0.031380062 |
| 562.319992 | 1847.903615 | 4.17046E-05 | 0.023451336 |
| 562.359992 | 1282.942108 | 2.89542E-05 | 0.016282693 |
| 562.399992 | 794.514136  | 1.79311E-05 | 0.010084438 |
| 562.439992 | 488.152527  | 1.10169E-05 | 0.006196358 |
| 562.479992 | 354.566119  | 8.00206E-06 | 0.004501001 |
| 562.519992 | 302.794481  | 6.83365E-06 | 0.003844065 |
| 562.559992 | 362.645267  | 8.1844E-06  | 0.004604215 |
| 562.599992 | 456.245388  | 1.02968E-05 | 0.005792992 |
| 562.639992 | 465.763175  | 1.05116E-05 | 0.005914261 |
| 562.679992 | 447.218997  | 1.00931E-05 | 0.005679191 |
| 562.719992 | 440.422902  | 9.93973E-06 | 0.005593286 |
| 562.759992 | 423.150219  | 9.54991E-06 | 0.005374308 |
| 562.799992 | 383.095745  | 8.64594E-06 | 0.004865933 |
| 562.839992 | 361.77915   | 8.16485E-06 | 0.004595505 |
| 562.879992 | 386.577464  | 8.72451E-06 | 0.004910855 |
| 562.919992 | 458.388659  | 1.03452E-05 | 0.005823516 |
| 562.959992 | 731.571618  | 1.65106E-05 | 0.00929478  |
| 562.999992 | 1288.666156 | 2.90834E-05 | 0.016373954 |
| 563.039992 | 2095.997045 | 4.73037E-05 | 0.026633894 |
| 563.079992 | 3022.582662 | 6.82155E-05 | 0.038410772 |
| 563.119992 | 3853.049841 | 8.6958E-05  | 0.04896777  |
| 563.159992 | 4436.875812 | 0.000100134 | 0.056391523 |
| 563.199992 | 4507.56197  | 0.000101729 | 0.057293995 |
| 563.239992 | 4025.781123 | 9.08563E-05 | 0.051173886 |
| 563.279992 | 3259.154049 | 7.35546E-05 | 0.041431816 |
| 563.319992 | 2365.552896 | 5.33872E-05 | 0.030074096 |
| 563.359992 | 1565.492984 | 3.5331E-05  | 0.01990407  |
| 563.399992 | 959.768935  | 2.16606E-05 | 0.012203609 |
| 563.439992 | 566.859607  | 1.27932E-05 | 0.007208218 |
| 563.479992 | 377.445077  | 8.51841E-06 | 0.004799953 |
| 563.519992 | 332.399817  | 7.5018E-06  | 0.004227415 |
| 563.559992 | 385.742752  | 8.70568E-06 | 0.004906171 |
| 563.599992 | 450.649402  | 1.01705E-05 | 0.00573211  |
| 563.639992 | 495.942984  | 1.11927E-05 | 0.006308677 |
| 563.679992 | 506.553808  | 1.14322E-05 | 0.00644411  |
| 563.719992 | 475.273779  | 1.07263E-05 | 0.006046611 |
| 563.759992 | 399.082521  | 9.00674E-06 | 0.005077638 |
| 563.799992 | 325.367231  | 7.34309E-06 | 0.004140031 |
| 563.839992 | 276.785949  | 6.24667E-06 | 0.003522124 |
| 563.879992 | 273.498007  | 6.17247E-06 | 0.003480532 |
| 563.919992 | 349.97417   | 7.89843E-06 | 0.004454082 |
| 563.959992 | 509.28564   | 1.14939E-05 | 0.006482081 |
| 563.999992 | 823.009467  | 1.85742E-05 | 0.010475836 |

|            |             |             |             |
|------------|-------------|-------------|-------------|
| 564.039992 | 1312.850629 | 2.96292E-05 | 0.016712059 |
| 564.079992 | 1929.261928 | 4.35408E-05 | 0.024560468 |
| 564.119992 | 2523.408686 | 5.69498E-05 | 0.032126532 |
| 564.159992 | 2911.601298 | 6.57108E-05 | 0.037071396 |
| 564.199992 | 2994.517441 | 6.75821E-05 | 0.038129813 |
| 564.239992 | 2830.249247 | 6.38748E-05 | 0.036040707 |
| 564.279992 | 2416.144644 | 5.4529E-05  | 0.030769635 |
| 564.319992 | 1892.203888 | 4.27044E-05 | 0.02409895  |
| 564.359992 | 1386.503758 | 3.12915E-05 | 0.017659647 |
| 564.399992 | 969.177193  | 2.1873E-05  | 0.012345109 |
| 564.439992 | 681.169266  | 1.5373E-05  | 0.008677159 |
| 564.479992 | 480.22659   | 1.0838E-05  | 0.00611786  |
| 564.519992 | 395.289437  | 8.92113E-06 | 0.005036157 |
| 564.559992 | 420.232952  | 9.48407E-06 | 0.005354328 |
| 564.599992 | 503.33433   | 1.13596E-05 | 0.006413605 |
| 564.639992 | 573.064786  | 1.29333E-05 | 0.007302644 |
| 564.679992 | 600.528022  | 1.35531E-05 | 0.007653154 |
| 564.719992 | 541.262257  | 1.22155E-05 | 0.006898357 |
| 564.759992 | 466.655348  | 1.05318E-05 | 0.005947917 |
| 564.799992 | 418.986225  | 9.45594E-06 | 0.005340712 |
| 564.839992 | 391.167406  | 8.8281E-06  | 0.004986466 |
| 564.879992 | 446.411554  | 1.00749E-05 | 0.005691102 |
| 564.919992 | 683.080784  | 1.54162E-05 | 0.008708909 |
| 564.959992 | 1196.269579 | 2.69981E-05 | 0.015252868 |
| 564.999992 | 2210.897598 | 4.98969E-05 | 0.028191736 |
| 565.039992 | 3971.890806 | 8.964E-05   | 0.050650209 |
| 565.079992 | 6212.670944 | 0.000140211 | 0.079230617 |
| 565.119992 | 8264.288653 | 0.000186513 | 0.105402498 |
| 565.159992 | 9357.800338 | 0.000211193 | 0.119357563 |
| 565.199992 | 8976.43767  | 0.000202586 | 0.114501433 |
| 565.239992 | 7494.133231 | 0.000169132 | 0.095600254 |
| 565.279992 | 5511.686005 | 0.000124391 | 0.070315786 |
| 565.319992 | 3676.546513 | 8.29745E-05 | 0.046907163 |
| 565.359992 | 2236.301488 | 5.04702E-05 | 0.028533837 |
| 565.399992 | 1267.345271 | 2.86022E-05 | 0.016171694 |
| 565.439992 | 709.228737  | 1.60063E-05 | 0.009050605 |
| 565.479992 | 437.209865  | 9.86722E-06 | 0.005579714 |
| 565.519992 | 368.21696   | 8.31014E-06 | 0.004699553 |
| 565.559992 | 407.172492  | 9.18932E-06 | 0.005197109 |
| 565.599992 | 455.842814  | 1.02877E-05 | 0.005818744 |
| 565.639992 | 485.229644  | 1.0951E-05  | 0.006194299 |
| 565.679992 | 513.009248  | 1.15779E-05 | 0.006549389 |
| 565.719992 | 493.618301  | 1.11403E-05 | 0.006302278 |
| 565.759992 | 419.878419  | 9.47607E-06 | 0.005361182 |
| 565.799992 | 353.703805  | 7.9826E-06  | 0.004516556 |
| 565.839992 | 297.716552  | 6.71905E-06 | 0.003801906 |

|            |             |             |             |
|------------|-------------|-------------|-------------|
| 565.879992 | 290.677037  | 6.56018E-06 | 0.003712272 |
| 565.919992 | 360.206064  | 8.12935E-06 | 0.004600561 |
| 565.959992 | 560.376743  | 1.26469E-05 | 0.007157652 |
| 565.999992 | 969.277822  | 2.18753E-05 | 0.012381392 |
| 566.039992 | 1627.113135 | 3.67217E-05 | 0.020785938 |
| 566.079992 | 2495.914305 | 5.63293E-05 | 0.031886895 |
| 566.119992 | 3409.673104 | 7.69516E-05 | 0.043563824 |
| 566.159992 | 4105.565963 | 9.26569E-05 | 0.052458633 |
| 566.199992 | 4262.115251 | 9.619E-05   | 0.05446278  |
| 566.239992 | 3836.103269 | 8.65755E-05 | 0.049022515 |
| 566.279992 | 3115.996799 | 7.03237E-05 | 0.039822909 |
| 566.319992 | 2303.682913 | 5.19909E-05 | 0.029443494 |
| 566.359992 | 1528.408875 | 3.44941E-05 | 0.019536055 |
| 566.399992 | 940.590676  | 2.12278E-05 | 0.012023438 |
| 566.439992 | 582.363168  | 1.31431E-05 | 0.007444792 |
| 566.479992 | 423.217681  | 9.55143E-06 | 0.005410696 |
| 566.519992 | 405.837419  | 9.15919E-06 | 0.005188862 |
| 566.559992 | 450.162472  | 1.01595E-05 | 0.005755989 |
| 566.599992 | 529.477697  | 1.19496E-05 | 0.006770629 |
| 566.639992 | 602.89968   | 1.36066E-05 | 0.007710047 |
| 566.679992 | 601.200652  | 1.35683E-05 | 0.007688862 |
| 566.719992 | 566.053041  | 1.2775E-05  | 0.007239864 |
| 566.759992 | 525.65095   | 1.18632E-05 | 0.006723593 |
| 566.799992 | 515.084828  | 1.16247E-05 | 0.006588907 |
| 566.839992 | 515.450505  | 1.1633E-05  | 0.00659405  |
| 566.879992 | 544.735912  | 1.22939E-05 | 0.006969183 |
| 566.919992 | 651.297354  | 1.46989E-05 | 0.008333086 |
| 566.959992 | 943.686368  | 2.12977E-05 | 0.012074936 |
| 566.999992 | 1380.329807 | 3.11521E-05 | 0.017663252 |
| 567.039992 | 2016.01211  | 4.54986E-05 | 0.025799517 |
| 567.079992 | 2872.413818 | 6.48264E-05 | 0.036761742 |
| 567.119992 | 3729.102878 | 8.41607E-05 | 0.047729192 |
| 567.159992 | 4403.591888 | 9.93829E-05 | 0.056366025 |
| 567.199992 | 4702.963621 | 0.000106139 | 0.060202232 |
| 567.239992 | 4516.258852 | 0.000101926 | 0.057816317 |
| 567.279992 | 3876.452505 | 8.74861E-05 | 0.049629133 |
| 567.319992 | 2903.117172 | 6.55193E-05 | 0.037170415 |
| 567.359992 | 1974.399824 | 4.45595E-05 | 0.025281251 |
| 567.399992 | 1254.08391  | 2.83029E-05 | 0.016059081 |
| 567.439992 | 762.278509  | 1.72036E-05 | 0.00976199  |
| 567.479992 | 495.447952  | 1.11816E-05 | 0.006345317 |
| 567.519992 | 388.274756  | 8.76282E-06 | 0.004973076 |
| 567.559992 | 358.325944  | 8.08692E-06 | 0.004589811 |
| 567.599992 | 411.69917   | 9.29148E-06 | 0.005273842 |
| 567.639992 | 472.594181  | 1.06658E-05 | 0.00605433  |
| 567.679992 | 511.776429  | 1.15501E-05 | 0.00655675  |

|            |             |             |             |
|------------|-------------|-------------|-------------|
| 567.719992 | 474.26749   | 1.07036E-05 | 0.006076623 |
| 567.759992 | 401.179592  | 9.05406E-06 | 0.005140536 |
| 567.799992 | 352.59949   | 7.95768E-06 | 0.00451837  |
| 567.839992 | 308.455717  | 6.96142E-06 | 0.00395297  |
| 567.879992 | 280.835259  | 6.33806E-06 | 0.003599258 |
| 567.919992 | 308.640664  | 6.96559E-06 | 0.003955898 |
| 567.959992 | 442.46337   | 9.98578E-06 | 0.005671525 |
| 567.999992 | 710.338574  | 1.60314E-05 | 0.009105808 |
| 568.039992 | 1105.125836 | 2.49412E-05 | 0.014167571 |
| 568.079992 | 1646.519795 | 3.71597E-05 | 0.021109658 |
| 568.119992 | 2227.538595 | 5.02724E-05 | 0.02856078  |
| 568.159992 | 2682.584969 | 6.05422E-05 | 0.034397659 |
| 568.199992 | 2933.093257 | 6.61958E-05 | 0.03761247  |
| 568.239992 | 2832.207458 | 6.3919E-05  | 0.036321319 |
| 568.279992 | 2420.983118 | 5.46382E-05 | 0.031049805 |
| 568.319992 | 1887.733991 | 4.26035E-05 | 0.024212436 |
| 568.359992 | 1338.500606 | 3.02081E-05 | 0.017169072 |
| 568.399992 | 864.034486  | 1.95001E-05 | 0.011083831 |
| 568.439992 | 552.194994  | 1.24623E-05 | 0.007084054 |
| 568.479992 | 385.727818  | 8.70534E-06 | 0.004948811 |
| 568.519992 | 316.962307  | 7.1534E-06  | 0.00406685  |
| 568.559992 | 353.448944  | 7.97685E-06 | 0.004535318 |
| 568.599992 | 438.899083  | 9.90534E-06 | 0.005632177 |
| 568.639992 | 480.010663  | 1.08332E-05 | 0.006160175 |
| 568.679992 | 451.327906  | 1.01858E-05 | 0.005792485 |
| 568.719992 | 407.084647  | 9.18733E-06 | 0.00522502  |
| 568.759992 | 353.836546  | 7.9856E-06  | 0.004541889 |
| 568.799992 | 312.04503   | 7.04242E-06 | 0.004005729 |
| 568.839992 | 309.069041  | 6.97526E-06 | 0.003967806 |
| 568.879992 | 358.979864  | 8.10168E-06 | 0.004608881 |
| 568.919992 | 478.061038  | 1.07892E-05 | 0.006138176 |
| 568.959992 | 700.680352  | 1.58134E-05 | 0.00899718  |
| 568.999992 | 1048.098639 | 2.36541E-05 | 0.013459198 |
| 569.039992 | 1602.020014 | 3.61554E-05 | 0.020573846 |
| 569.079992 | 2300.154875 | 5.19113E-05 | 0.029541677 |
| 569.119992 | 2936.450145 | 6.62716E-05 | 0.037716487 |
| 569.159992 | 3294.0581   | 7.43423E-05 | 0.042312665 |
| 569.199992 | 3345.046133 | 7.5493E-05  | 0.042970633 |
| 569.239992 | 3175.658905 | 7.16702E-05 | 0.040797543 |
| 569.279992 | 2733.574764 | 6.1693E-05  | 0.035120576 |
| 569.319992 | 2121.553931 | 4.78805E-05 | 0.027259336 |
| 569.359992 | 1507.043971 | 3.40119E-05 | 0.019365006 |
| 569.399992 | 977.873217  | 2.20692E-05 | 0.012566223 |
| 569.439992 | 613.060492  | 1.38359E-05 | 0.007878727 |
| 569.479992 | 419.762097  | 9.47345E-06 | 0.005394938 |
| 569.519992 | 333.377507  | 7.52387E-06 | 0.004284992 |

|            |             |             |             |
|------------|-------------|-------------|-------------|
| 569.559992 | 346.270664  | 7.81485E-06 | 0.004451024 |
| 569.599992 | 416.121562  | 9.39128E-06 | 0.005349275 |
| 569.639992 | 452.786805  | 1.02188E-05 | 0.005821019 |
| 569.679992 | 427.118921  | 9.63948E-06 | 0.005491418 |
| 569.719992 | 377.465559  | 8.51887E-06 | 0.004853372 |
| 569.759992 | 341.890502  | 7.71599E-06 | 0.004396264 |
| 569.799992 | 289.036793  | 6.52316E-06 | 0.003716895 |
| 569.839992 | 255.601937  | 5.76858E-06 | 0.003287167 |
| 569.879992 | 270.621835  | 6.10756E-06 | 0.003480575 |
| 569.919992 | 335.703077  | 7.57635E-06 | 0.004317914 |
| 569.959992 | 459.293589  | 1.03656E-05 | 0.005907987 |
| 569.999992 | 670.028889  | 1.51216E-05 | 0.008619323 |
| 570.039992 | 1027.327944 | 2.31854E-05 | 0.013216583 |
| 570.079992 | 1585.026415 | 3.57718E-05 | 0.020392809 |
| 570.119992 | 2261.980408 | 5.10497E-05 | 0.029104481 |
| 570.159992 | 2804.411638 | 6.32917E-05 | 0.036086375 |
| 570.199992 | 3128.35268  | 7.06026E-05 | 0.040257581 |
| 570.239992 | 3195.611099 | 7.21205E-05 | 0.041125988 |
| 570.279992 | 2905.329511 | 6.55692E-05 | 0.037392826 |
| 570.319992 | 2272.498563 | 5.12871E-05 | 0.029250074 |
| 570.359992 | 1595.40592  | 3.60061E-05 | 0.020536433 |
| 570.399992 | 1024.126539 | 2.31131E-05 | 0.013183717 |
| 570.439992 | 624.807458  | 1.4101E-05  | 0.008043794 |
| 570.479992 | 427.964784  | 9.65857E-06 | 0.00551002  |
| 570.519992 | 384.213923  | 8.67117E-06 | 0.004947078 |
| 570.559992 | 412.022783  | 9.29878E-06 | 0.005305512 |
| 570.599992 | 459.204613  | 1.03636E-05 | 0.005913475 |
| 570.639992 | 475.785297  | 1.07378E-05 | 0.006127425 |
| 570.679992 | 469.742428  | 1.06014E-05 | 0.006050025 |
| 570.719992 | 432.353606  | 9.75762E-06 | 0.005568868 |
| 570.759992 | 372.819826  | 8.41402E-06 | 0.004802388 |
| 570.799992 | 320.239276  | 7.22735E-06 | 0.004125374 |
| 570.839992 | 296.564117  | 6.69304E-06 | 0.003820654 |
| 570.879992 | 336.098672  | 7.58528E-06 | 0.004330284 |
| 570.919992 | 448.983215  | 1.01329E-05 | 0.00578509  |
| 570.959992 | 689.140775  | 1.55529E-05 | 0.008880111 |
| 570.999992 | 1094.575656 | 2.4703E-05  | 0.01410544  |
| 571.039992 | 1723.160679 | 3.88893E-05 | 0.022207366 |
| 571.079992 | 2449.655085 | 5.52853E-05 | 0.03157233  |
| 571.119992 | 3143.048319 | 7.09342E-05 | 0.040511953 |
| 571.159992 | 3619.643739 | 8.16903E-05 | 0.046658241 |
| 571.199992 | 3712.235371 | 8.378E-05   | 0.047855125 |
| 571.239992 | 3422.881705 | 7.72497E-05 | 0.044128102 |
| 571.279992 | 2778.420557 | 6.27051E-05 | 0.035822159 |
| 571.319992 | 2025.562406 | 4.57141E-05 | 0.026117392 |
| 571.359992 | 1385.094069 | 3.12596E-05 | 0.01786051  |

|            |             |             |             |
|------------|-------------|-------------|-------------|
| 571.399992 | 877.826107  | 1.98113E-05 | 0.011320184 |
| 571.439992 | 552.410937  | 1.24671E-05 | 0.007124225 |
| 571.479992 | 389.934278  | 8.80027E-06 | 0.00502918  |
| 571.519992 | 337.309747  | 7.61261E-06 | 0.004350759 |
| 571.559992 | 368.676105  | 8.32051E-06 | 0.004755668 |
| 571.599992 | 420.566994  | 9.49161E-06 | 0.005425405 |
| 571.639992 | 459.086679  | 1.03609E-05 | 0.005922732 |
| 571.679992 | 473.480507  | 1.06858E-05 | 0.006108856 |
| 571.719992 | 431.765277  | 9.74434E-06 | 0.005571035 |
| 571.759992 | 356.468198  | 8.04499E-06 | 0.004599804 |
| 571.799992 | 278.318649  | 6.28126E-06 | 0.003591627 |
| 571.839992 | 237.622336  | 5.36281E-06 | 0.003066666 |
| 571.879992 | 256.710589  | 5.7936E-06  | 0.003313244 |
| 571.919992 | 322.44123   | 7.27705E-06 | 0.00416189  |
| 571.959992 | 467.701318  | 1.05554E-05 | 0.006037248 |
| 571.999992 | 779.441226  | 1.75909E-05 | 0.010061996 |
| 572.039992 | 1248.897868 | 2.81859E-05 | 0.016123454 |
| 572.079992 | 1891.927109 | 4.26982E-05 | 0.024426763 |
| 572.119992 | 2641.037888 | 5.96045E-05 | 0.034100953 |
| 572.159992 | 3393.393635 | 7.65842E-05 | 0.043818397 |
| 572.199992 | 3980.985607 | 8.98453E-05 | 0.05140948  |
| 572.239992 | 4164.063103 | 9.39771E-05 | 0.053777457 |
| 572.279992 | 3800.260453 | 8.57666E-05 | 0.049082501 |
| 572.319992 | 2912.949782 | 6.57412E-05 | 0.037625014 |
| 572.359992 | 1902.042621 | 4.29265E-05 | 0.024569384 |
| 572.399992 | 1128.576643 | 2.54704E-05 | 0.014579258 |
| 572.439992 | 656.124137  | 1.48078E-05 | 0.008476581 |
| 572.479992 | 411.299867  | 9.28247E-06 | 0.005314026 |
| 572.519992 | 336.387604  | 7.5918E-06  | 0.004346457 |
| 572.559992 | 369.182405  | 8.33193E-06 | 0.004770531 |
| 572.599992 | 438.367168  | 9.89334E-06 | 0.005664924 |
| 572.639992 | 446.354073  | 1.00736E-05 | 0.00576854  |
| 572.679992 | 433.531714  | 9.78421E-06 | 0.00560322  |
| 572.719992 | 444.062635  | 1.00219E-05 | 0.005739728 |
| 572.759992 | 419.690194  | 9.47182E-06 | 0.005425081 |
| 572.799992 | 368.533068  | 8.31728E-06 | 0.004764137 |
| 572.839992 | 317.839725  | 7.1732E-06  | 0.004109096 |
| 572.879992 | 318.160213  | 7.18043E-06 | 0.004113526 |
| 572.919992 | 435.200078  | 9.82186E-06 | 0.00562714  |
| 572.959992 | 734.308787  | 1.65723E-05 | 0.00949528  |
| 572.999992 | 1203.605454 | 2.71637E-05 | 0.015564799 |
| 573.039992 | 1892.537919 | 4.27119E-05 | 0.024475652 |
| 573.079992 | 2722.106392 | 6.14341E-05 | 0.035206682 |
| 573.119992 | 3507.884181 | 7.91681E-05 | 0.045372798 |
| 573.159992 | 4069.244165 | 9.18372E-05 | 0.052637393 |
| 573.199992 | 4294.631921 | 9.69239E-05 | 0.055556756 |

|            |             |             |             |
|------------|-------------|-------------|-------------|
| 573.239992 | 4084.742373 | 9.21869E-05 | 0.052845244 |
| 573.279992 | 3499.59306  | 7.89809E-05 | 0.045278193 |
| 573.319992 | 2616.918572 | 5.90602E-05 | 0.033860397 |
| 573.359992 | 1724.132807 | 3.89113E-05 | 0.022310169 |
| 573.399992 | 1044.110974 | 2.35641E-05 | 0.013511672 |
| 573.439992 | 613.566889  | 1.38474E-05 | 0.007940624 |
| 573.479992 | 407.691008  | 9.20102E-06 | 0.0052766   |
| 573.519992 | 327.656059  | 7.39474E-06 | 0.004241032 |
| 573.559992 | 341.401006  | 7.70495E-06 | 0.004419248 |
| 573.599992 | 399.714921  | 9.02101E-06 | 0.005174451 |
| 573.639992 | 440.262902  | 9.93612E-06 | 0.005699756 |
| 573.679992 | 447.184501  | 1.00923E-05 | 0.005789769 |
| 573.719992 | 409.817455  | 9.24901E-06 | 0.005306341 |
| 573.759992 | 357.611457  | 8.07079E-06 | 0.004630698 |
| 573.799992 | 304.536855  | 6.87297E-06 | 0.003943712 |
| 573.839992 | 299.864287  | 6.76752E-06 | 0.003883473 |
| 573.879992 | 324.396664  | 7.32118E-06 | 0.004201479 |
| 573.919992 | 408.970923  | 9.2299E-06  | 0.005297226 |
| 573.959992 | 583.481421  | 1.31684E-05 | 0.007558113 |
| 573.999992 | 911.221037  | 2.0565E-05  | 0.011804304 |
| 574.039992 | 1540.949459 | 3.47771E-05 | 0.019963436 |
| 574.079992 | 2607.081516 | 5.88382E-05 | 0.033777832 |
| 574.119992 | 3854.789867 | 8.69972E-05 | 0.049946854 |
| 574.159992 | 5196.656759 | 0.000117281 | 0.067338233 |
| 574.199992 | 6420.701074 | 0.000144906 | 0.083205185 |
| 574.239992 | 6988.213028 | 0.000157714 | 0.090565821 |
| 574.279992 | 6609.953294 | 0.000149177 | 0.085669618 |
| 574.319992 | 5390.244964 | 0.00012165  | 0.069866211 |
| 574.359992 | 3749.798799 | 8.46277E-05 | 0.048606786 |
| 574.399992 | 2259.974768 | 5.10045E-05 | 0.029296974 |
| 574.439992 | 1228.650105 | 2.77289E-05 | 0.015928601 |
| 574.479992 | 669.529446  | 1.51103E-05 | 0.008680592 |
| 574.519992 | 476.765748  | 1.07599E-05 | 0.0061818   |
| 574.559992 | 445.014766  | 1.00434E-05 | 0.005770515 |
| 574.599992 | 463.405908  | 1.04584E-05 | 0.006009411 |
| 574.639992 | 487.917427  | 1.10116E-05 | 0.006327715 |
| 574.679992 | 515.579812  | 1.16359E-05 | 0.006686929 |
| 574.719992 | 525.035297  | 1.18493E-05 | 0.006810038 |
| 574.759992 | 470.060999  | 1.06086E-05 | 0.006097411 |
| 574.799992 | 407.749326  | 9.20233E-06 | 0.005289502 |
| 574.839992 | 414.54273   | 9.35565E-06 | 0.005378003 |
| 574.879992 | 491.75327   | 1.10982E-05 | 0.006380125 |
| 574.919992 | 626.248837  | 1.41336E-05 | 0.008125668 |
| 574.959992 | 896.373183  | 2.02299E-05 | 0.01163138  |
| 574.999992 | 1486.426445 | 3.35466E-05 | 0.01928928  |
| 575.039992 | 2482.820683 | 5.60338E-05 | 0.032221679 |



|            |             |             |             |
|------------|-------------|-------------|-------------|
| 575.079992 | 3662.031423 | 8.26469E-05 | 0.047528606 |
| 575.119992 | 4742.992036 | 0.000107043 | 0.06156241  |
| 575.159992 | 5659.721049 | 0.000127732 | 0.073466348 |
| 575.199992 | 6200.352103 | 0.000139933 | 0.080489639 |
| 575.239992 | 6192.332    | 0.000139752 | 0.080391117 |
| 575.279992 | 5568.258809 | 0.000125668 | 0.072294197 |
| 575.319992 | 4434.496339 | 0.00010008  | 0.057578258 |
| 575.359992 | 3042.038005 | 6.86546E-05 | 0.039501087 |
| 575.399992 | 1832.314883 | 4.13528E-05 | 0.023794398 |
| 575.439992 | 1022.413138 | 2.30744E-05 | 0.013277956 |
| 575.479992 | 594.888619  | 1.34258E-05 | 0.007726284 |
| 575.519992 | 430.326981  | 9.71188E-06 | 0.005589381 |
| 575.559992 | 395.762449  | 8.93181E-06 | 0.005140791 |
| 575.599992 | 432.289779  | 9.75618E-06 | 0.005615656 |
| 575.639992 | 460.224349  | 1.03866E-05 | 0.005978955 |
| 575.679992 | 426.833519  | 9.63304E-06 | 0.005545547 |
| 575.719992 | 410.482541  | 9.26402E-06 | 0.005333481 |
| 575.759992 | 418.385591  | 9.44238E-06 | 0.005436545 |
| 575.799992 | 430.470197  | 9.71511E-06 | 0.005593962 |
| 575.839992 | 429.589604  | 9.69524E-06 | 0.005582906 |
| 575.879992 | 471.289543  | 1.06363E-05 | 0.00612526  |
| 575.919992 | 568.817986  | 1.28374E-05 | 0.007393332 |
| 575.959992 | 724.718492  | 1.63559E-05 | 0.009420336 |
| 575.999992 | 1018.680068 | 2.29902E-05 | 0.013242349 |
| 576.039992 | 1520.125918 | 3.43071E-05 | 0.019762276 |
| 576.079992 | 2161.31385  | 4.87778E-05 | 0.028099939 |
| 576.119992 | 2760.320078 | 6.22966E-05 | 0.035890305 |
| 576.159992 | 3206.707698 | 7.23709E-05 | 0.041697232 |
| 576.199992 | 3452.954108 | 7.79284E-05 | 0.044902323 |
| 576.239992 | 3379.243782 | 7.62648E-05 | 0.043946842 |
| 576.279992 | 2969.766976 | 6.70235E-05 | 0.038624304 |
| 576.319992 | 2360.66104  | 5.32768E-05 | 0.030704503 |
| 576.359992 | 1708.263986 | 3.85531E-05 | 0.022220487 |
| 576.399992 | 1107.36232  | 2.49916E-05 | 0.014405173 |
| 576.439992 | 690.995494  | 1.55948E-05 | 0.00898947  |
| 576.479992 | 466.080085  | 1.05188E-05 | 0.006063865 |
| 576.519992 | 368.687444  | 8.32076E-06 | 0.004797086 |
| 576.559992 | 357.493674  | 8.06813E-06 | 0.004651763 |
| 576.599992 | 410.176866  | 9.25712E-06 | 0.005337656 |
| 576.639992 | 454.127846  | 1.0249E-05  | 0.005910002 |
| 576.679992 | 451.625212  | 1.01926E-05 | 0.005877841 |
| 576.719992 | 456.90023   | 1.03116E-05 | 0.005946907 |
| 576.759992 | 450.963324  | 1.01776E-05 | 0.005870041 |
| 576.799992 | 434.128828  | 9.79768E-06 | 0.005651303 |
| 576.839992 | 434.10616   | 9.79717E-06 | 0.0056514   |
| 576.879992 | 466.598413  | 1.05305E-05 | 0.006074821 |

|            |             |             |             |
|------------|-------------|-------------|-------------|
| 576.919992 | 614.581393  | 1.38702E-05 | 0.008002022 |
| 576.959992 | 907.591991  | 2.04831E-05 | 0.011817922 |
| 576.999992 | 1418.422875 | 3.20118E-05 | 0.018470825 |
| 577.039992 | 2203.957587 | 4.97403E-05 | 0.028702115 |
| 577.079992 | 3180.866262 | 7.17877E-05 | 0.041427257 |
| 577.119992 | 4102.893453 | 9.25966E-05 | 0.053439343 |
| 577.159992 | 4809.482413 | 0.000108543 | 0.062646861 |
| 577.199992 | 5177.748551 | 0.000116855 | 0.067448458 |
| 577.239992 | 5002.100059 | 0.00011289  | 0.065164871 |
| 577.279992 | 4372.505204 | 9.86814E-05 | 0.05696677  |
| 577.319992 | 3361.725645 | 7.58695E-05 | 0.043800959 |
| 577.359992 | 2286.259915 | 5.15977E-05 | 0.029790449 |
| 577.399992 | 1390.437945 | 3.13802E-05 | 0.018118955 |
| 577.439992 | 782.310969  | 1.76557E-05 | 0.010195089 |
| 577.479992 | 455.453756  | 1.0279E-05  | 0.005935892 |
| 577.519992 | 360.483727  | 8.13562E-06 | 0.004698481 |
| 577.559992 | 383.3667    | 8.65205E-06 | 0.004997079 |
| 577.599992 | 444.288544  | 1.0027E-05  | 0.00579158  |
| 577.639992 | 528.612999  | 1.19301E-05 | 0.006891279 |
| 577.679992 | 517.848356  | 1.16871E-05 | 0.006751413 |
| 577.719992 | 440.389902  | 9.93899E-06 | 0.005741951 |
| 577.759992 | 394.802929  | 8.91015E-06 | 0.005147929 |
| 577.799992 | 357.861347  | 8.07643E-06 | 0.004666562 |
| 577.839992 | 319.841212  | 7.21837E-06 | 0.004171063 |
| 577.879992 | 309.020495  | 6.97416E-06 | 0.004030229 |
| 577.919992 | 344.497214  | 7.77482E-06 | 0.004493225 |
| 577.959992 | 473.184036  | 1.06791E-05 | 0.006172095 |
| 577.999992 | 736.428454  | 1.66202E-05 | 0.009606455 |
| 578.039992 | 1188.433229 | 2.68213E-05 | 0.015503774 |
| 578.079992 | 1843.250748 | 4.15996E-05 | 0.024047898 |
| 578.119992 | 2504.60315  | 5.65254E-05 | 0.032678466 |
| 578.159992 | 2937.749246 | 6.63009E-05 | 0.038332533 |
| 578.199992 | 3112.951872 | 7.0255E-05  | 0.040621433 |
| 578.239992 | 3024.954119 | 6.8269E-05  | 0.039475867 |
| 578.279992 | 2630.892734 | 5.93756E-05 | 0.034335713 |
| 578.319992 | 2034.038938 | 4.59054E-05 | 0.026548025 |
| 578.359992 | 1449.796952 | 3.27199E-05 | 0.01892388  |
| 578.399992 | 979.108721  | 2.20971E-05 | 0.012780974 |
| 578.439992 | 644.615424  | 1.45481E-05 | 0.008415187 |
| 578.479992 | 432.872667  | 9.76933E-06 | 0.005651364 |
| 578.519992 | 343.388917  | 7.74981E-06 | 0.00448342  |
| 578.559992 | 364.007769  | 8.21515E-06 | 0.004752956 |
| 578.599992 | 408.840728  | 9.22697E-06 | 0.005338722 |
| 578.639992 | 466.774018  | 1.05344E-05 | 0.006095648 |
| 578.679992 | 499.615892  | 1.12756E-05 | 0.006524984 |
| 578.719992 | 500.577668  | 1.12973E-05 | 0.006537997 |

|            |             |             |             |
|------------|-------------|-------------|-------------|
| 578.759992 | 463.843228  | 1.04683E-05 | 0.006058631 |
| 578.799992 | 393.335142  | 8.87703E-06 | 0.005138023 |
| 578.839992 | 363.25944   | 8.19826E-06 | 0.004745481 |
| 578.879992 | 417.935988  | 9.43223E-06 | 0.005460131 |
| 578.919992 | 571.355477  | 1.28947E-05 | 0.007464998 |
| 578.959992 | 875.892257  | 1.97677E-05 | 0.011444689 |
| 578.999992 | 1460.93816  | 3.29713E-05 | 0.019090405 |
| 579.039992 | 2406.593669 | 5.43135E-05 | 0.031449669 |
| 579.079992 | 3544.587922 | 7.99964E-05 | 0.046324322 |
| 579.119992 | 4646.691787 | 0.000104869 | 0.060731944 |
| 579.159992 | 5499.535575 | 0.000124117 | 0.071883518 |
| 579.199992 | 5728.95393  | 0.000129295 | 0.074887379 |
| 579.239992 | 5328.771847 | 0.000120263 | 0.069661115 |
| 579.279992 | 4463.674867 | 0.000100739 | 0.058356043 |
| 579.319992 | 3314.046346 | 7.47934E-05 | 0.043329318 |
| 579.359992 | 2196.732124 | 4.95772E-05 | 0.028723037 |
| 579.399992 | 1309.191796 | 2.95466E-05 | 0.01711932  |
| 579.439992 | 760.658245  | 1.7167E-05  | 0.009947245 |
| 579.479992 | 489.890887  | 1.10562E-05 | 0.006406821 |
| 579.519992 | 403.494012  | 9.1063E-06  | 0.005277282 |
| 579.559992 | 438.25847   | 9.89088E-06 | 0.00573236  |
| 579.599992 | 507.864699  | 1.14618E-05 | 0.006643259 |
| 579.639992 | 576.888002  | 1.30196E-05 | 0.007546657 |
| 579.679992 | 575.341927  | 1.29847E-05 | 0.007526951 |
| 579.719992 | 501.850521  | 1.13261E-05 | 0.006565948 |
| 579.759992 | 419.831942  | 9.47502E-06 | 0.005493239 |
| 579.799992 | 351.182782  | 7.92571E-06 | 0.004595324 |
| 579.839992 | 284.211601  | 6.41426E-06 | 0.003719244 |
| 579.879992 | 260.52916   | 5.87978E-06 | 0.003409567 |
| 579.919992 | 331.262962  | 7.47614E-06 | 0.004335565 |
| 579.959992 | 481.165149  | 1.08592E-05 | 0.006297917 |
| 579.999992 | 774.864476  | 1.74876E-05 | 0.010142815 |
| 580.039992 | 1251.042771 | 2.82343E-05 | 0.016377019 |
| 580.079992 | 1846.856033 | 4.1681E-05  | 0.024178296 |
| 580.119992 | 2475.539592 | 5.58695E-05 | 0.032411003 |
| 580.159992 | 2937.430292 | 6.62937E-05 | 0.038460958 |
| 580.199992 | 3051.161575 | 6.88605E-05 | 0.039952842 |
| 580.239992 | 2919.46965  | 6.58884E-05 | 0.038231064 |
| 580.279992 | 2576.516799 | 5.81484E-05 | 0.03374235  |
| 580.319991 | 1982.783145 | 4.47487E-05 | 0.025968538 |
| 580.359991 | 1338.764287 | 3.0214E-05  | 0.017535023 |
| 580.399991 | 871.634832  | 1.96716E-05 | 0.011417387 |
| 580.439991 | 581.945151  | 1.31337E-05 | 0.00762332  |
| 580.479991 | 414.948866  | 9.36482E-06 | 0.005436089 |
| 580.519991 | 361.143286  | 8.1505E-06  | 0.004731529 |
| 580.559991 | 414.443935  | 9.35342E-06 | 0.005430223 |

|            |             |             |             |
|------------|-------------|-------------|-------------|
| 580.599991 | 489.609956  | 1.10498E-05 | 0.006415522 |
| 580.639991 | 537.182293  | 1.21235E-05 | 0.007039363 |
| 580.679991 | 550.464582  | 1.24232E-05 | 0.007213915 |
| 580.719991 | 493.969283  | 1.11482E-05 | 0.006473982 |
| 580.759991 | 422.641497  | 9.53843E-06 | 0.005539538 |
| 580.799991 | 365.424456  | 8.24712E-06 | 0.004789928 |
| 580.839991 | 344.277234  | 7.76986E-06 | 0.004513044 |
| 580.879991 | 394.592111  | 8.90539E-06 | 0.005172965 |
| 580.919991 | 573.129815  | 1.29347E-05 | 0.00751405  |
| 580.959991 | 886.084384  | 1.99977E-05 | 0.011617858 |
| 580.999991 | 1395.373673 | 3.14916E-05 | 0.018296643 |
| 581.039991 | 2176.706404 | 4.91252E-05 | 0.028543724 |
| 581.079991 | 3016.121891 | 6.80697E-05 | 0.039553923 |
| 581.119991 | 3758.55551  | 8.48254E-05 | 0.049293714 |
| 581.159991 | 4142.898734 | 9.34995E-05 | 0.054338142 |
| 581.199991 | 4170.62084  | 9.41251E-05 | 0.054705509 |
| 581.239991 | 3847.382285 | 8.68301E-05 | 0.050469103 |
| 581.279991 | 3083.219907 | 6.9584E-05  | 0.040447775 |
| 581.319991 | 2232.09186  | 5.03752E-05 | 0.029284113 |
| 581.359991 | 1489.862098 | 3.36241E-05 | 0.019547714 |
| 581.399991 | 933.564038  | 2.10692E-05 | 0.012249656 |
| 581.439991 | 576.651949  | 1.30142E-05 | 0.007566995 |
| 581.479991 | 402.601423  | 9.08615E-06 | 0.005283416 |
| 581.519991 | 357.049208  | 8.0581E-06  | 0.004685948 |
| 581.559991 | 393.918144  | 8.89018E-06 | 0.005170175 |
| 581.599991 | 443.525751  | 1.00098E-05 | 0.005821675 |
| 581.639991 | 469.0287    | 1.05853E-05 | 0.006156848 |
| 581.679991 | 483.422507  | 1.09102E-05 | 0.006346229 |
| 581.719991 | 472.623161  | 1.06664E-05 | 0.006204885 |
| 581.759991 | 438.914431  | 9.90569E-06 | 0.005762733 |
| 581.799991 | 380.381242  | 8.58467E-06 | 0.004994564 |
| 581.839991 | 331.281986  | 7.47657E-06 | 0.004350169 |
| 581.879991 | 340.755983  | 7.69039E-06 | 0.004474883 |
| 581.919991 | 399.61636   | 9.01878E-06 | 0.005248211 |
| 581.959991 | 502.92123   | 1.13502E-05 | 0.006605381 |
| 581.999991 | 709.731109  | 1.60176E-05 | 0.009322268 |
| 582.039991 | 1088.708547 | 2.45706E-05 | 0.014301092 |
| 582.079991 | 1614.478096 | 3.64365E-05 | 0.02120897  |
| 582.119991 | 2061.337903 | 4.65215E-05 | 0.02708111  |
| 582.159991 | 2448.001362 | 5.5248E-05  | 0.032163164 |
| 582.199991 | 2613.07657  | 5.89735E-05 | 0.03433437  |
| 582.239991 | 2449.916392 | 5.52912E-05 | 0.032192748 |
| 582.279991 | 2065.767841 | 4.66215E-05 | 0.027146768 |
| 582.319991 | 1603.163543 | 3.61812E-05 | 0.021069018 |
| 582.359991 | 1152.01922  | 2.59995E-05 | 0.015141051 |
| 582.399991 | 780.26639   | 1.76095E-05 | 0.010255788 |

|            |             |             |             |
|------------|-------------|-------------|-------------|
| 582.439991 | 513.788973  | 1.15955E-05 | 0.006753684 |
| 582.479991 | 364.880236  | 8.23484E-06 | 0.004796629 |
| 582.519991 | 324.619422  | 7.32621E-06 | 0.004267663 |
| 582.559991 | 355.545912  | 8.02418E-06 | 0.004674564 |
| 582.599991 | 415.537043  | 9.37809E-06 | 0.005463676 |
| 582.639991 | 473.786241  | 1.06927E-05 | 0.006229992 |
| 582.679991 | 475.24295   | 1.07256E-05 | 0.006249576 |
| 582.719991 | 429.514079  | 9.69353E-06 | 0.005648616 |
| 582.759991 | 406.914785  | 9.1835E-06  | 0.005351776 |
| 582.799991 | 396.530733  | 8.94915E-06 | 0.005215562 |
| 582.839991 | 399.82887   | 9.02358E-06 | 0.005259304 |
| 582.879991 | 435.076835  | 9.81908E-06 | 0.005723344 |
| 582.919991 | 537.870405  | 1.2139E-05  | 0.007076058 |
| 582.959991 | 798.97339   | 1.80317E-05 | 0.010511769 |
| 582.999991 | 1282.555105 | 2.89455E-05 | 0.016875216 |
| 583.039991 | 1996.809828 | 4.50652E-05 | 0.026274823 |
| 583.079991 | 2855.211804 | 6.44382E-05 | 0.037572598 |
| 583.119991 | 3584.91225  | 8.09065E-05 | 0.047178184 |
| 583.159991 | 3979.977167 | 8.98225E-05 | 0.052380912 |
| 583.199991 | 3908.40972  | 8.82074E-05 | 0.051442534 |
| 583.239991 | 3483.597415 | 7.86199E-05 | 0.045854294 |
| 583.279991 | 2810.719111 | 6.3434E-05  | 0.036999792 |
| 583.319991 | 2043.679072 | 4.6123E-05  | 0.026904462 |
| 583.359991 | 1355.442514 | 3.05904E-05 | 0.017845244 |
| 583.399991 | 826.393993  | 1.86506E-05 | 0.010880737 |
| 583.439991 | 516.274214  | 1.16516E-05 | 0.006798004 |
| 583.479991 | 378.221415  | 8.53593E-06 | 0.004980545 |
| 583.519991 | 332.816589  | 7.51121E-06 | 0.004382939 |
| 583.559991 | 355.029569  | 8.01252E-06 | 0.004675788 |
| 583.599991 | 425.959936  | 9.61332E-06 | 0.005610335 |
| 583.639991 | 486.378123  | 1.09769E-05 | 0.006406544 |
| 583.679991 | 498.988123  | 1.12615E-05 | 0.006573093 |
| 583.719991 | 454.770842  | 1.02635E-05 | 0.005991036 |
| 583.759991 | 378.169527  | 8.53476E-06 | 0.004982251 |
| 583.799991 | 308.466795  | 6.96167E-06 | 0.00406422  |
| 583.839991 | 274.332494  | 6.1913E-06  | 0.00361473  |
| 583.879991 | 296.137312  | 6.68341E-06 | 0.003902307 |
| 583.919991 | 361.15458   | 8.15076E-06 | 0.004759389 |
| 583.959991 | 491.333927  | 1.10887E-05 | 0.00647537  |
| 583.999991 | 721.497673  | 1.62832E-05 | 0.009509387 |
| 584.039991 | 1089.974145 | 2.45992E-05 | 0.014366916 |
| 584.079991 | 1643.840809 | 3.70992E-05 | 0.021668899 |
| 584.119991 | 2248.321899 | 5.07415E-05 | 0.029639121 |
| 584.159991 | 2667.47501  | 6.02012E-05 | 0.03516713  |
| 584.199991 | 2781.713071 | 6.27794E-05 | 0.036675719 |
| 584.239991 | 2630.469913 | 5.9366E-05  | 0.034684016 |

|            |             |             |             |
|------------|-------------|-------------|-------------|
| 584.279991 | 2270.127026 | 5.12336E-05 | 0.02993477  |
| 584.319991 | 1728.304492 | 3.90054E-05 | 0.02279165  |
| 584.359991 | 1175.00324  | 2.65182E-05 | 0.015496167 |
| 584.399991 | 742.654706  | 1.67607E-05 | 0.009794943 |
| 584.439991 | 471.771291  | 1.06472E-05 | 0.006222662 |
| 584.479991 | 375.188477  | 8.46748E-06 | 0.004949073 |
| 584.519991 | 369.157363  | 8.33137E-06 | 0.004869851 |
| 584.559991 | 389.600038  | 8.79273E-06 | 0.005139878 |
| 584.599991 | 448.39169   | 1.01196E-05 | 0.005915904 |
| 584.639991 | 508.69702   | 1.14806E-05 | 0.006712008 |
| 584.679991 | 520.564565  | 1.17484E-05 | 0.006869064 |
| 584.719991 | 497.160901  | 1.12202E-05 | 0.006560692 |
| 584.759991 | 451.298648  | 1.01852E-05 | 0.005955887 |
| 584.799991 | 409.694151  | 9.24623E-06 | 0.005407193 |
| 584.839991 | 374.832369  | 8.45944E-06 | 0.004947421 |
| 584.879991 | 392.136687  | 8.84998E-06 | 0.005176176 |
| 584.919991 | 509.033188  | 1.14882E-05 | 0.00671966  |
| 584.959991 | 762.88615   | 1.72173E-05 | 0.010071419 |
| 584.999991 | 1189.533217 | 2.68461E-05 | 0.015704973 |
| 585.039991 | 1754.489305 | 3.95964E-05 | 0.023165466 |
| 585.079991 | 2473.875236 | 5.58319E-05 | 0.032666138 |
| 585.119991 | 3138.281303 | 7.08266E-05 | 0.041442082 |
| 585.159991 | 3540.364285 | 7.99011E-05 | 0.046754921 |
| 585.199991 | 3719.881562 | 8.39525E-05 | 0.049129029 |
| 585.239991 | 3686.610662 | 8.32017E-05 | 0.048692943 |
| 585.279991 | 3317.356406 | 7.48681E-05 | 0.043818809 |
| 585.319991 | 2676.453713 | 6.04038E-05 | 0.035355571 |
| 585.359991 | 1935.813941 | 4.36886E-05 | 0.025573573 |
| 585.399991 | 1264.109573 | 2.85292E-05 | 0.016700989 |
| 585.439991 | 768.327005  | 1.73401E-05 | 0.010151571 |
| 585.479991 | 450.358178  | 1.0164E-05  | 0.005950793 |
| 585.519991 | 348.880137  | 7.87374E-06 | 0.004610231 |
| 585.559991 | 370.899895  | 8.37069E-06 | 0.004901544 |
| 585.599991 | 451.351803  | 1.01864E-05 | 0.005965145 |
| 585.639991 | 484.391593  | 1.0932E-05  | 0.006402242 |
| 585.679991 | 482.885219  | 1.0898E-05  | 0.006382768 |
| 585.719991 | 463.793321  | 1.04672E-05 | 0.00613083  |
| 585.759991 | 398.798829  | 9.00033E-06 | 0.005272036 |
| 585.799991 | 320.043197  | 7.22293E-06 | 0.004231192 |
| 585.839991 | 266.102339  | 6.00556E-06 | 0.003518297 |
| 585.879991 | 268.484883  | 6.05933E-06 | 0.00355004  |
| 585.919991 | 341.563914  | 7.70862E-06 | 0.004516636 |
| 585.959991 | 465.146096  | 1.04977E-05 | 0.006151232 |
| 585.999991 | 696.519975  | 1.57195E-05 | 0.009211618 |
| 586.039991 | 1083.756995 | 2.44589E-05 | 0.014333885 |
| 586.079991 | 1639.141418 | 3.69931E-05 | 0.021680938 |

|            |             |             |             |
|------------|-------------|-------------|-------------|
| 586.119991 | 2184.615837 | 4.93037E-05 | 0.028897906 |
| 586.159991 | 2570.143913 | 5.80046E-05 | 0.033999957 |
| 586.199991 | 2743.650571 | 6.19204E-05 | 0.036297721 |
| 586.239991 | 2600.176274 | 5.86824E-05 | 0.034401944 |
| 586.279991 | 2243.590355 | 5.06347E-05 | 0.029686117 |
| 586.319991 | 1778.021879 | 4.01275E-05 | 0.023527542 |
| 586.359991 | 1275.722978 | 2.87913E-05 | 0.016882061 |
| 586.399991 | 866.928533  | 1.95654E-05 | 0.011473132 |
| 586.439991 | 572.98238   | 1.29314E-05 | 0.007583498 |
| 586.479991 | 382.147123  | 8.62453E-06 | 0.005058113 |
| 586.519991 | 308.491459  | 6.96222E-06 | 0.004083483 |
| 586.559991 | 323.080999  | 7.29149E-06 | 0.004276895 |
| 586.599991 | 391.888273  | 8.84437E-06 | 0.005188109 |
| 586.639991 | 416.854486  | 9.40783E-06 | 0.005519006 |
| 586.679991 | 408.063225  | 9.20942E-06 | 0.005402982 |
| 586.719991 | 404.431014  | 9.12744E-06 | 0.005355254 |
| 586.759991 | 394.576438  | 8.90504E-06 | 0.005225122 |
| 586.799991 | 382.438162  | 8.6311E-06  | 0.005064727 |
| 586.839991 | 364.581896  | 8.22811E-06 | 0.004828581 |
| 586.879991 | 383.61512   | 8.65766E-06 | 0.005081007 |
| 586.919991 | 478.302551  | 1.07946E-05 | 0.00633558  |
| 586.959991 | 670.414903  | 1.51303E-05 | 0.008880899 |
| 586.999991 | 1053.363341 | 2.37729E-05 | 0.013954718 |
| 587.039991 | 1665.158776 | 3.75803E-05 | 0.022061147 |
| 587.079991 | 2407.231194 | 5.43279E-05 | 0.031894797 |
| 587.119991 | 3115.180157 | 7.03053E-05 | 0.041277634 |
| 587.159991 | 3559.880399 | 8.03415E-05 | 0.047173339 |
| 587.199991 | 3629.488609 | 8.19125E-05 | 0.048099021 |
| 587.239991 | 3274.594966 | 7.3903E-05  | 0.043398825 |
| 587.279991 | 2704.441039 | 6.10355E-05 | 0.035844909 |
| 587.319991 | 2080.647854 | 4.69573E-05 | 0.027578975 |
| 587.359991 | 1437.310693 | 3.24381E-05 | 0.019052842 |
| 587.399991 | 909.036432  | 2.05157E-05 | 0.012050914 |
| 587.439991 | 550.307584  | 1.24197E-05 | 0.007295814 |
| 587.479991 | 357.783358  | 8.07467E-06 | 0.004743708 |
| 587.519991 | 310.473172  | 7.00695E-06 | 0.004116721 |
| 587.559991 | 319.941662  | 7.22064E-06 | 0.004242558 |
| 587.599991 | 377.720015  | 8.52461E-06 | 0.005009063 |
| 587.639991 | 427.639104  | 9.65122E-06 | 0.005671442 |
| 587.679991 | 435.87073   | 9.837E-06   | 0.005781005 |
| 587.719991 | 436.37169   | 9.8483E-06  | 0.005788044 |
| 587.759991 | 389.731716  | 8.7957E-06  | 0.005169762 |
| 587.799991 | 304.903145  | 6.88124E-06 | 0.004044792 |
| 587.839991 | 260.579933  | 5.88093E-06 | 0.003457044 |
| 587.879991 | 283.309072  | 6.39389E-06 | 0.003758841 |
| 587.919991 | 372.27085   | 8.40163E-06 | 0.004939489 |

|            |             |             |             |
|------------|-------------|-------------|-------------|
| 587.959991 | 497.633124  | 1.12309E-05 | 0.006603312 |
| 587.999991 | 722.349863  | 1.63024E-05 | 0.009585829 |
| 588.039991 | 1169.903494 | 2.64031E-05 | 0.015526074 |
| 588.079991 | 1847.139498 | 4.16874E-05 | 0.024515506 |
| 588.119991 | 2506.590553 | 5.65703E-05 | 0.033270099 |
| 588.159991 | 2936.237122 | 6.62668E-05 | 0.03897547  |
| 588.199991 | 3063.397887 | 6.91366E-05 | 0.040666161 |
| 588.239991 | 2795.441764 | 6.30892E-05 | 0.037111606 |
| 588.279991 | 2318.04892  | 5.23151E-05 | 0.030775947 |
| 588.319991 | 1791.413887 | 4.04297E-05 | 0.02378561  |
| 588.359991 | 1275.236131 | 2.87803E-05 | 0.016933179 |
| 588.399991 | 846.93172   | 1.91141E-05 | 0.011246718 |
| 588.439991 | 595.652439  | 1.3443E-05  | 0.007910426 |
| 588.479991 | 454.981307  | 1.02683E-05 | 0.006042686 |
| 588.519991 | 410.268795  | 9.2592E-06  | 0.005449222 |
| 588.559991 | 442.963182  | 9.99706E-06 | 0.005883871 |
| 588.599991 | 563.126555  | 1.2709E-05  | 0.007480507 |
| 588.639991 | 672.167143  | 1.51699E-05 | 0.008929596 |
| 588.679991 | 689.449426  | 1.55599E-05 | 0.00915981  |
| 588.719991 | 621.532742  | 1.40271E-05 | 0.008258051 |
| 588.759991 | 501.888098  | 1.13269E-05 | 0.006668835 |
| 588.799991 | 404.592036  | 9.13108E-06 | 0.005376379 |
| 588.839991 | 345.836844  | 7.80506E-06 | 0.004595929 |
| 588.879991 | 381.776626  | 8.61617E-06 | 0.005073888 |
| 588.919991 | 493.239417  | 1.11317E-05 | 0.006555696 |
| 588.959991 | 718.552408  | 1.62167E-05 | 0.009551003 |
| 588.999991 | 1161.78291  | 2.62198E-05 | 0.015443475 |
| 589.039991 | 1898.149644 | 4.28386E-05 | 0.025233645 |
| 589.079991 | 2820.675148 | 6.36587E-05 | 0.037500072 |
| 589.119991 | 3705.297316 | 8.36234E-05 | 0.049264216 |
| 589.159991 | 4324.082419 | 9.75885E-05 | 0.05749525  |
| 589.199991 | 4508.090166 | 0.000101741 | 0.059945982 |
| 589.239991 | 4209.447315 | 9.50014E-05 | 0.055978602 |
| 589.279991 | 3535.331768 | 7.97875E-05 | 0.047017185 |
| 589.319991 | 2667.138324 | 6.01936E-05 | 0.03547329  |
| 589.359991 | 1771.177743 | 3.9973E-05  | 0.023558496 |
| 589.399991 | 1062.921837 | 2.39887E-05 | 0.014138919 |
| 589.439991 | 638.677686  | 1.44141E-05 | 0.008496227 |
| 589.479991 | 434.389245  | 9.80356E-06 | 0.005779003 |
| 589.519991 | 373.514058  | 8.42969E-06 | 0.004969472 |
| 589.559991 | 400.13145   | 9.03041E-06 | 0.005323968 |
| 589.599991 | 452.124168  | 1.02038E-05 | 0.006016168 |
| 589.639991 | 476.960846  | 1.07643E-05 | 0.006347086 |
| 589.679991 | 474.693982  | 1.07132E-05 | 0.006317349 |
| 589.719991 | 465.292971  | 1.0501E-05  | 0.006192658 |
| 589.759991 | 430.710881  | 9.72054E-06 | 0.005732788 |



|            |             |             |             |
|------------|-------------|-------------|-------------|
| 589.799991 | 357.08012   | 8.0588E-06  | 0.004753081 |
| 589.839991 | 289.037532  | 6.52317E-06 | 0.003847629 |
| 589.879991 | 273.783791  | 6.17892E-06 | 0.003644821 |
| 589.919991 | 326.090725  | 7.35941E-06 | 0.004341465 |
| 589.959991 | 471.128342  | 1.06327E-05 | 0.006272874 |
| 589.999991 | 747.577461  | 1.68718E-05 | 0.009954351 |
| 590.039991 | 1155.330871 | 2.60742E-05 | 0.015384826 |
| 590.079991 | 1772.758577 | 4.00087E-05 | 0.023608329 |
| 590.119991 | 2413.070986 | 5.44597E-05 | 0.032137729 |
| 590.159991 | 2919.92027  | 6.58985E-05 | 0.038890678 |
| 590.199991 | 3163.496764 | 7.13957E-05 | 0.042137751 |
| 590.239991 | 2984.077692 | 6.73465E-05 | 0.039750584 |
| 590.279991 | 2455.523847 | 5.54178E-05 | 0.032711991 |
| 590.319991 | 1776.413658 | 4.00912E-05 | 0.023666626 |
| 590.359991 | 1207.538158 | 2.72525E-05 | 0.016088759 |
| 590.399991 | 806.802717  | 1.82084E-05 | 0.010750247 |
| 590.439991 | 518.832022  | 1.17093E-05 | 0.006913648 |
| 590.479991 | 352.785743  | 7.96188E-06 | 0.004701333 |
| 590.519991 | 296.072896  | 6.68195E-06 | 0.003945827 |
| 590.559991 | 344.141226  | 7.76679E-06 | 0.004586754 |
| 590.599991 | 436.714518  | 9.85604E-06 | 0.005820976 |
| 590.639991 | 492.342599  | 1.11115E-05 | 0.006562888 |
| 590.679991 | 486.713742  | 1.09845E-05 | 0.006488296 |
| 590.719991 | 480.331351  | 1.08404E-05 | 0.006403647 |
| 590.759991 | 453.526382  | 1.02355E-05 | 0.0060467   |
| 590.799991 | 393.191722  | 8.87379E-06 | 0.005242635 |
| 590.839991 | 346.994828  | 7.83119E-06 | 0.00462698  |
| 590.879991 | 368.316333  | 8.31239E-06 | 0.004911623 |
| 590.919991 | 474.531922  | 1.07095E-05 | 0.006328472 |
| 590.959991 | 701.963152  | 1.58423E-05 | 0.009362184 |
| 590.999991 | 1114.524105 | 2.51533E-05 | 0.014865574 |
| 591.039991 | 1819.670159 | 4.10674E-05 | 0.024272488 |
| 591.079991 | 2672.405657 | 6.03125E-05 | 0.035649496 |
| 591.119991 | 3509.361356 | 7.92014E-05 | 0.046817529 |
| 591.159991 | 4161.399066 | 9.3917E-05  | 0.055519961 |
| 591.199991 | 4399.397188 | 9.92883E-05 | 0.058699222 |
| 591.239991 | 4163.963201 | 9.39748E-05 | 0.055561689 |
| 591.279991 | 3580.744467 | 8.08124E-05 | 0.047782764 |
| 591.319991 | 2748.955637 | 6.20401E-05 | 0.036685551 |
| 591.359991 | 1858.41602  | 4.19419E-05 | 0.024802739 |
| 591.399991 | 1124.629733 | 2.53813E-05 | 0.015010516 |
| 591.439991 | 648.079364  | 1.46262E-05 | 0.008650548 |
| 591.479991 | 404.383439  | 9.12637E-06 | 0.005398066 |
| 591.519991 | 331.43764   | 7.48009E-06 | 0.00442462  |
| 591.559991 | 376.71934   | 8.50203E-06 | 0.005029461 |
| 591.599991 | 457.099652  | 1.03161E-05 | 0.006103006 |

|            |             |             |             |
|------------|-------------|-------------|-------------|
| 591.639991 | 491.245044  | 1.10867E-05 | 0.006559345 |
| 591.679991 | 493.731531  | 1.11428E-05 | 0.006592991 |
| 591.719991 | 466.131665  | 1.05199E-05 | 0.00622486  |
| 591.759991 | 379.664367  | 8.5685E-06  | 0.005070493 |
| 591.799991 | 314.418719  | 7.09599E-06 | 0.004199408 |
| 591.839991 | 311.207083  | 7.02351E-06 | 0.004156794 |
| 591.879991 | 335.065425  | 7.56196E-06 | 0.004475773 |
| 591.919991 | 384.043584  | 8.66733E-06 | 0.005130365 |
| 591.959991 | 522.527835  | 1.17927E-05 | 0.006980822 |
| 591.999991 | 827.311387  | 1.86713E-05 | 0.011053389 |
| 592.039991 | 1260.138459 | 2.84396E-05 | 0.016837363 |
| 592.079991 | 1762.211256 | 3.97707E-05 | 0.023547408 |
| 592.119991 | 2288.206939 | 5.16416E-05 | 0.030578049 |
| 592.159991 | 2753.387556 | 6.21401E-05 | 0.036796894 |
| 592.199991 | 2901.99698  | 6.5494E-05  | 0.038785564 |
| 592.239991 | 2753.510125 | 6.21429E-05 | 0.036803504 |
| 592.279991 | 2440.688077 | 5.50829E-05 | 0.032624517 |
| 592.319991 | 2012.688778 | 4.54236E-05 | 0.026905296 |
| 592.359991 | 1497.781728 | 3.38028E-05 | 0.020023454 |
| 592.399991 | 1036.841002 | 2.34001E-05 | 0.013862194 |
| 592.439991 | 696.925248  | 1.57286E-05 | 0.009318271 |
| 592.479991 | 505.461198  | 1.14076E-05 | 0.006758748 |
| 592.519991 | 457.145085  | 1.03171E-05 | 0.006113104 |
| 592.559991 | 463.856439  | 1.04686E-05 | 0.00620327  |
| 592.599991 | 512.714292  | 1.15712E-05 | 0.006857121 |
| 592.639991 | 563.336387  | 1.27137E-05 | 0.007534657 |
| 592.679991 | 581.864502  | 1.31319E-05 | 0.007782997 |
| 592.719991 | 570.180662  | 1.28682E-05 | 0.00762723  |
| 592.759991 | 532.111665  | 1.2009E-05  | 0.007118466 |
| 592.799991 | 512.041703  | 1.15561E-05 | 0.006850437 |
| 592.839991 | 502.158286  | 1.1333E-05  | 0.006718663 |
| 592.879991 | 536.162856  | 1.21004E-05 | 0.007174114 |
| 592.919991 | 677.472724  | 1.52896E-05 | 0.009065519 |
| 592.959991 | 931.278377  | 2.10177E-05 | 0.012462629 |
| 592.999991 | 1429.207481 | 3.22552E-05 | 0.019127346 |
| 593.039991 | 2175.962625 | 4.91084E-05 | 0.029123272 |
| 593.079991 | 3082.16202  | 6.95601E-05 | 0.041254706 |
| 593.119991 | 3947.323801 | 8.90856E-05 | 0.05283845  |
| 593.159991 | 4623.093392 | 0.000104337 | 0.061888403 |
| 593.199991 | 4887.675753 | 0.000110308 | 0.065434725 |
| 593.239991 | 4560.015269 | 0.000102913 | 0.061052222 |
| 593.279991 | 3803.064812 | 8.58299E-05 | 0.050921148 |
| 593.319991 | 2842.582128 | 6.41531E-05 | 0.038063328 |
| 593.359991 | 1912.989871 | 4.31735E-05 | 0.025617438 |
| 593.399991 | 1166.843558 | 2.6334E-05  | 0.015626615 |
| 593.439991 | 682.668055  | 1.54069E-05 | 0.009143051 |

|            |             |             |             |
|------------|-------------|-------------|-------------|
| 593.479991 | 451.354623  | 1.01864E-05 | 0.006045451 |
| 593.519991 | 402.633974  | 9.08689E-06 | 0.00539325  |
| 593.559991 | 406.022801  | 9.16337E-06 | 0.005439009 |
| 593.599991 | 440.635901  | 9.94454E-06 | 0.005903078 |
| 593.639991 | 500.4964    | 1.12955E-05 | 0.006705464 |
| 593.679991 | 505.014532  | 1.13975E-05 | 0.006766453 |
| 593.719991 | 476.571313  | 1.07556E-05 | 0.006385785 |
| 593.759991 | 430.700391  | 9.72031E-06 | 0.00577153  |
| 593.799991 | 398.196305  | 8.98674E-06 | 0.005336324 |
| 593.839991 | 410.617438  | 9.26706E-06 | 0.005503153 |
| 593.879991 | 425.789789  | 9.60948E-06 | 0.005706879 |
| 593.919991 | 454.450224  | 1.02563E-05 | 0.006091427 |
| 593.959991 | 600.732306  | 1.35577E-05 | 0.008052726 |
| 593.999991 | 920.677832  | 2.07784E-05 | 0.012342379 |
| 594.039991 | 1426.929433 | 3.22038E-05 | 0.019130351 |
| 594.079991 | 2027.919342 | 4.57673E-05 | 0.027189446 |
| 594.119991 | 2561.31725  | 5.78054E-05 | 0.034343322 |
| 594.159991 | 2888.080894 | 6.518E-05   | 0.038727326 |
| 594.199991 | 2974.392353 | 6.71279E-05 | 0.039887393 |
| 594.239991 | 2747.735913 | 6.20126E-05 | 0.03685035  |
| 594.279991 | 2305.439191 | 5.20306E-05 | 0.030920716 |
| 594.319991 | 1775.480615 | 4.00701E-05 | 0.023814476 |
| 594.359991 | 1252.113413 | 2.82585E-05 | 0.016795695 |
| 594.399991 | 817.246044  | 1.84441E-05 | 0.010963176 |
| 594.439991 | 537.690112  | 1.21349E-05 | 0.00721348  |
| 594.479991 | 393.020065  | 8.86992E-06 | 0.005272987 |
| 594.519991 | 332.98163   | 7.51493E-06 | 0.004467777 |
| 594.559991 | 361.688591  | 8.16281E-06 | 0.004853279 |
| 594.599991 | 457.451924  | 1.03241E-05 | 0.006138682 |
| 594.639991 | 538.736359  | 1.21585E-05 | 0.007229948 |
| 594.679991 | 578.646829  | 1.30593E-05 | 0.007766076 |
| 594.719991 | 563.552921  | 1.27186E-05 | 0.007564008 |
| 594.759991 | 528.504919  | 1.19276E-05 | 0.007094071 |
| 594.799991 | 495.469895  | 1.11821E-05 | 0.006651092 |
| 594.839991 | 490.536653  | 1.10707E-05 | 0.006585312 |
| 594.879991 | 624.369189  | 1.40911E-05 | 0.008382539 |
| 594.919991 | 967.118236  | 2.18265E-05 | 0.012985028 |
| 594.959991 | 1751.104593 | 3.952E-05   | 0.023512814 |
| 594.999991 | 3407.906031 | 7.69117E-05 | 0.045762456 |
| 595.039991 | 6132.786838 | 0.000138408 | 0.082358567 |
| 595.079991 | 9905.391571 | 0.000223551 | 0.133030662 |
| 595.119991 | 14032.77633 | 0.0003167   | 0.18847463  |
| 595.159991 | 16967.08953 | 0.000382924 | 0.227900793 |
| 595.199991 | 17230.78031 | 0.000388875 | 0.231458225 |
| 595.239991 | 14515.8805  | 0.000327603 | 0.195002528 |
| 595.279991 | 10370.3814  | 0.000234045 | 0.139322343 |

|            |             |             |             |
|------------|-------------|-------------|-------------|
| 595.319991 | 6534.532083 | 0.000147475 | 0.087794987 |
| 595.359991 | 3664.385859 | 8.27001E-05 | 0.049236322 |
| 595.399991 | 1883.483901 | 4.25076E-05 | 0.02530903  |
| 595.439991 | 967.262965  | 2.18298E-05 | 0.012998323 |
| 595.479991 | 552.239041  | 1.24633E-05 | 0.007421625 |
| 595.519991 | 418.922105  | 9.45449E-06 | 0.005630337 |
| 595.559991 | 440.511658  | 9.94173E-06 | 0.005920899 |
| 595.599991 | 474.550425  | 1.07099E-05 | 0.006378841 |
| 595.639991 | 489.244518  | 1.10416E-05 | 0.006576799 |
| 595.679991 | 462.752595  | 1.04437E-05 | 0.006221092 |
| 595.719991 | 426.491821  | 9.62533E-06 | 0.005733999 |
| 595.759991 | 395.882737  | 8.93452E-06 | 0.005322831 |
| 595.799991 | 355.243438  | 8.01735E-06 | 0.004776737 |
| 595.839991 | 328.122475  | 7.40527E-06 | 0.004412354 |
| 595.879991 | 351.625822  | 7.93571E-06 | 0.004728728 |
| 595.919991 | 483.944371  | 1.0922E-05  | 0.006508609 |
| 595.959991 | 840.985394  | 1.89799E-05 | 0.011311243 |
| 595.999991 | 1497.606943 | 3.37989E-05 | 0.020144146 |
| 596.039991 | 2575.189707 | 5.81184E-05 | 0.034640917 |
| 596.079991 | 4228.189988 | 9.54244E-05 | 0.056880551 |
| 596.119991 | 6056.783622 | 0.000136693 | 0.081485531 |
| 596.159991 | 7220.636216 | 0.00016296  | 0.097150054 |
| 596.199991 | 7225.4616   | 0.000163069 | 0.0972215   |
| 596.239991 | 6210.975351 | 0.000140173 | 0.083576786 |
| 596.279991 | 4663.632624 | 0.000105252 | 0.062759478 |
| 596.319991 | 3144.012105 | 7.0956E-05  | 0.042312466 |
| 596.359991 | 1902.639362 | 4.29399E-05 | 0.02560765  |
| 596.399991 | 1082.068293 | 2.44208E-05 | 0.014564549 |
| 596.439991 | 645.770366  | 1.45741E-05 | 0.008692599 |
| 596.479991 | 478.116834  | 1.07904E-05 | 0.006436276 |
| 596.519991 | 439.230078  | 9.91281E-06 | 0.00591319  |
| 596.559991 | 518.561901  | 1.17032E-05 | 0.006981673 |
| 596.599991 | 695.862673  | 1.57047E-05 | 0.009369395 |
| 596.639991 | 833.992275  | 1.8822E-05  | 0.011229984 |
| 596.679991 | 843.726911  | 1.90417E-05 | 0.011361826 |
| 596.719991 | 756.759399  | 1.7079E-05  | 0.010191384 |
| 596.759991 | 638.497992  | 1.441E-05   | 0.008599318 |
| 596.799991 | 546.148617  | 1.23258E-05 | 0.007356045 |
| 596.839991 | 491.139746  | 1.10843E-05 | 0.006615577 |
| 596.879991 | 551.433704  | 1.24451E-05 | 0.007428226 |
| 596.919991 | 772.191799  | 1.74273E-05 | 0.0104027   |
| 596.959991 | 1127.81692  | 2.54533E-05 | 0.015194576 |
| 596.999991 | 1691.141668 | 3.81667E-05 | 0.022785527 |
| 597.039991 | 2669.896073 | 6.02558E-05 | 0.035975143 |
| 597.079991 | 4003.16822  | 9.03459E-05 | 0.053943748 |
| 597.119991 | 5243.814704 | 0.000118346 | 0.07066652  |

|            |             |             |             |
|------------|-------------|-------------|-------------|
| 597.159991 | 6045.742583 | 0.000136444 | 0.081478891 |
| 597.199991 | 6110.47505  | 0.000137905 | 0.082356811 |
| 597.239991 | 5423.819884 | 0.000122408 | 0.073106989 |
| 597.279991 | 4229.288929 | 9.54492E-05 | 0.057009874 |
| 597.319991 | 3020.828135 | 6.81759E-05 | 0.040722818 |
| 597.359991 | 2002.457725 | 4.51927E-05 | 0.0269963   |
| 597.399991 | 1258.99281  | 2.84137E-05 | 0.016974353 |
| 597.439991 | 766.592563  | 1.73009E-05 | 0.010336265 |
| 597.479991 | 494.863394  | 1.11684E-05 | 0.006672882 |
| 597.519991 | 395.516086  | 8.92625E-06 | 0.005333611 |
| 597.559991 | 420.902499  | 9.49918E-06 | 0.005676332 |
| 597.599991 | 487.318175  | 1.09981E-05 | 0.00657246  |
| 597.639991 | 552.777331  | 1.24754E-05 | 0.007455807 |
| 597.679991 | 570.103012  | 1.28664E-05 | 0.007690008 |
| 597.719991 | 531.337393  | 1.19915E-05 | 0.007167586 |
| 597.759991 | 454.254803  | 1.02519E-05 | 0.006128175 |
| 597.799991 | 373.664785  | 8.43309E-06 | 0.005041303 |
| 597.839991 | 334.302001  | 7.54473E-06 | 0.004510542 |
| 597.879991 | 330.434108  | 7.45744E-06 | 0.004458653 |
| 597.919991 | 370.700677  | 8.3662E-06  | 0.005002317 |
| 597.959991 | 519.778419  | 1.17307E-05 | 0.007014474 |
| 597.999991 | 867.331034  | 1.95745E-05 | 0.011705523 |
| 598.039991 | 1369.692974 | 3.09121E-05 | 0.01848665  |
| 598.079991 | 1953.014801 | 4.40768E-05 | 0.026361466 |
| 598.119991 | 2622.741039 | 5.91916E-05 | 0.035403686 |
| 598.159991 | 3090.360335 | 6.97451E-05 | 0.041718745 |
| 598.199991 | 3185.786683 | 7.18988E-05 | 0.043009842 |
| 598.239991 | 2972.071836 | 6.70755E-05 | 0.040127259 |
| 598.279991 | 2498.329962 | 5.63838E-05 | 0.033733316 |
| 598.319991 | 1904.663101 | 4.29856E-05 | 0.02571914  |
| 598.359991 | 1335.067799 | 3.01306E-05 | 0.018028958 |
| 598.399991 | 877.872395  | 1.98124E-05 | 0.011855714 |
| 598.439991 | 549.649043  | 1.24048E-05 | 0.007423536 |
| 598.479991 | 361.372147  | 8.15567E-06 | 0.004881003 |
| 598.519991 | 330.374613  | 7.45609E-06 | 0.004462622 |
| 598.559991 | 388.955478  | 8.77818E-06 | 0.005254269 |
| 598.599991 | 456.270265  | 1.02974E-05 | 0.006164014 |
| 598.639991 | 502.130955  | 1.13324E-05 | 0.006784026 |
| 598.679991 | 492.683311  | 1.11192E-05 | 0.006656828 |
| 598.719991 | 447.418837  | 1.00976E-05 | 0.006045647 |
| 598.759991 | 419.007719  | 9.45642E-06 | 0.005662126 |
| 598.799991 | 417.074218  | 9.41278E-06 | 0.005636375 |
| 598.839991 | 424.832398  | 9.58788E-06 | 0.005741603 |
| 598.879991 | 459.970225  | 1.03809E-05 | 0.006216906 |
| 598.919991 | 556.009779  | 1.25484E-05 | 0.007515467 |
| 598.959991 | 813.304072  | 1.83551E-05 | 0.010993995 |

|            |             |             |             |
|------------|-------------|-------------|-------------|
| 598.999991 | 1261.802185 | 2.84771E-05 | 0.017057793 |
| 599.039991 | 1905.560126 | 4.30058E-05 | 0.025762217 |
| 599.079991 | 2716.338946 | 6.1304E-05  | 0.036725992 |
| 599.119991 | 3509.985316 | 7.92155E-05 | 0.047459577 |
| 599.159991 | 3929.230946 | 8.86773E-05 | 0.053131872 |
| 599.199991 | 3965.05613  | 8.94858E-05 | 0.053619887 |
| 599.239991 | 3731.202915 | 8.42081E-05 | 0.050460833 |
| 599.279991 | 3173.114886 | 7.16128E-05 | 0.042916108 |
| 599.319991 | 2430.475588 | 5.48524E-05 | 0.032874169 |
| 599.359991 | 1692.158076 | 3.81897E-05 | 0.022889349 |
| 599.399991 | 1081.097636 | 2.43989E-05 | 0.014624681 |
| 599.439991 | 666.138057  | 1.50338E-05 | 0.009011866 |
| 599.479991 | 443.635452  | 1.00122E-05 | 0.006002134 |
| 599.519991 | 347.693816  | 7.84697E-06 | 0.004704412 |
| 599.559991 | 362.640624  | 8.18429E-06 | 0.004906975 |
| 599.599991 | 438.715761  | 9.9012E-06  | 0.005936762 |
| 599.639991 | 495.915183  | 1.11921E-05 | 0.00671124  |
| 599.679991 | 481.934983  | 1.08766E-05 | 0.00652248  |
| 599.719991 | 442.231618  | 9.98055E-06 | 0.005985536 |
| 599.759991 | 386.759432  | 8.72862E-06 | 0.005235078 |
| 599.799991 | 308.440733  | 6.96108E-06 | 0.004175254 |
| 599.839991 | 250.210158  | 5.64689E-06 | 0.003387233 |
| 599.879991 | 255.569834  | 5.76786E-06 | 0.003460021 |
| 599.919991 | 314.424154  | 7.09612E-06 | 0.004257101 |
| 599.959991 | 454.20656   | 1.02508E-05 | 0.006150076 |
| 599.999991 | 696.919484  | 1.57285E-05 | 0.009437101 |
| 600.039991 | 1058.866644 | 2.38971E-05 | 0.014339243 |
| 600.079991 | 1528.503998 | 3.44962E-05 | 0.020700483 |
| 600.119991 | 2001.120624 | 4.51625E-05 | 0.027102922 |
| 600.159991 | 2413.638731 | 5.44725E-05 | 0.032692194 |
| 600.199991 | 2608.578957 | 5.8872E-05  | 0.03533497  |
| 600.239991 | 2485.803866 | 5.61011E-05 | 0.033674142 |
| 600.279991 | 2123.866388 | 4.79327E-05 | 0.028773044 |
| 600.319991 | 1688.231321 | 3.8101E-05  | 0.02287281  |
| 600.359991 | 1208.528514 | 2.72748E-05 | 0.016374702 |
| 600.399991 | 795.199646  | 1.79465E-05 | 0.010775107 |
| 600.439991 | 524.237263  | 1.18313E-05 | 0.007103989 |
| 600.479991 | 369.002176  | 8.32787E-06 | 0.005000716 |
| 600.519991 | 321.00544   | 7.24465E-06 | 0.004350555 |
| 600.559991 | 352.830029  | 7.96288E-06 | 0.004782189 |
| 600.599991 | 406.496784  | 9.17407E-06 | 0.005509944 |
| 600.639991 | 457.470067  | 1.03245E-05 | 0.006201285 |
| 600.679991 | 495.83747   | 1.11904E-05 | 0.006721826 |
| 600.719991 | 486.480212  | 1.09792E-05 | 0.006595413 |
| 600.759991 | 448.714629  | 1.01269E-05 | 0.006083815 |
| 600.799991 | 402.90839   | 9.09308E-06 | 0.005463123 |

|            |             |             |             |
|------------|-------------|-------------|-------------|
| 600.839991 | 370.019218  | 8.35082E-06 | 0.005017506 |
| 600.879991 | 388.818674  | 8.7751E-06  | 0.00527278  |
| 600.919991 | 498.564119  | 1.12519E-05 | 0.00676149  |
| 600.959991 | 701.7725    | 1.5838E-05  | 0.009518021 |
| 600.999991 | 1023.722071 | 2.3104E-05  | 0.013885493 |
| 601.039991 | 1607.455989 | 3.6278E-05  | 0.021804554 |
| 601.079991 | 2340.093466 | 5.28127E-05 | 0.031744627 |
| 601.119991 | 2893.077269 | 6.52927E-05 | 0.039248762 |
| 601.159991 | 3308.941563 | 7.46782E-05 | 0.044893547 |
| 601.199991 | 3453.640538 | 7.79439E-05 | 0.046859846 |
| 601.239991 | 3159.184205 | 7.12984E-05 | 0.042867442 |
| 601.279991 | 2630.723734 | 5.93718E-05 | 0.035699058 |
| 601.319991 | 2051.594582 | 4.63016E-05 | 0.027842097 |
| 601.359991 | 1476.266206 | 3.33173E-05 | 0.020035674 |
| 601.399991 | 986.026969  | 2.22533E-05 | 0.013383108 |
| 601.439991 | 609.125995  | 1.37471E-05 | 0.008268071 |
| 601.479991 | 400.166499  | 9.0312E-06  | 0.005432086 |
| 601.519991 | 335.502778  | 7.57183E-06 | 0.004554607 |
| 601.559991 | 352.372152  | 7.95255E-06 | 0.004783935 |
| 601.599991 | 398.332393  | 8.98981E-06 | 0.005408268 |
| 601.639991 | 439.803397  | 9.92575E-06 | 0.005971728 |
| 601.679991 | 465.617029  | 1.05083E-05 | 0.006322651 |
| 601.719991 | 463.726317  | 1.04657E-05 | 0.006297395 |
| 601.759991 | 402.78924   | 9.09039E-06 | 0.005470234 |
| 601.799991 | 327.718928  | 7.39616E-06 | 0.004451009 |
| 601.839991 | 294.704093  | 6.65106E-06 | 0.004002874 |
| 601.879991 | 295.118514  | 6.66041E-06 | 0.00400877  |
| 601.919991 | 351.783259  | 7.93926E-06 | 0.004778798 |
| 601.959991 | 478.97051   | 1.08097E-05 | 0.006507005 |
| 601.999991 | 698.737598  | 1.57695E-05 | 0.00949326  |
| 602.039991 | 1060.233815 | 2.3928E-05  | 0.014405613 |
| 602.079991 | 1545.710917 | 3.48845E-05 | 0.021003285 |
| 602.119991 | 2038.348823 | 4.60027E-05 | 0.027699142 |
| 602.159991 | 2440.928258 | 5.50884E-05 | 0.033172001 |
| 602.199991 | 2719.498748 | 6.13753E-05 | 0.036960204 |
| 602.239991 | 2804.142836 | 6.32856E-05 | 0.038113118 |
| 602.279991 | 2621.188929 | 5.91566E-05 | 0.035628826 |
| 602.319991 | 2157.964073 | 4.87022E-05 | 0.029334335 |
| 602.359991 | 1558.08018  | 3.51637E-05 | 0.021181206 |
| 602.399991 | 1040.970606 | 2.34933E-05 | 0.014152338 |
| 602.439991 | 687.988345  | 1.55269E-05 | 0.009354049 |
| 602.479991 | 466.342548  | 1.05247E-05 | 0.006340922 |
| 602.519991 | 376.617434  | 8.49973E-06 | 0.005121258 |
| 602.559991 | 369.393404  | 8.33669E-06 | 0.005023359 |
| 602.599991 | 403.478762  | 9.10595E-06 | 0.005487248 |
| 602.639991 | 463.207805  | 1.0454E-05  | 0.006299971 |

|            |             |             |             |
|------------|-------------|-------------|-------------|
| 602.679991 | 469.915748  | 1.06053E-05 | 0.006391629 |
| 602.719991 | 426.717746  | 9.63043E-06 | 0.00580445  |
| 602.759991 | 411.36139   | 9.28385E-06 | 0.005595936 |
| 602.799991 | 378.670286  | 8.54606E-06 | 0.005151565 |
| 602.839991 | 357.236611  | 8.06233E-06 | 0.004860297 |
| 602.879991 | 386.453063  | 8.72171E-06 | 0.005258143 |
| 602.919991 | 461.844352  | 1.04232E-05 | 0.006284346 |
| 602.959991 | 636.908506  | 1.43741E-05 | 0.00866703  |
| 602.999991 | 1002.526177 | 2.26256E-05 | 0.013643248 |
| 603.039991 | 1580.842057 | 3.56774E-05 | 0.021514901 |
| 603.079991 | 2352.489578 | 5.30924E-05 | 0.032018972 |
| 603.119991 | 3104.806229 | 7.00712E-05 | 0.042261313 |
| 603.159991 | 3602.431734 | 8.13019E-05 | 0.049038033 |
| 603.199991 | 3766.843186 | 8.50124E-05 | 0.051279481 |
| 603.239991 | 3527.710206 | 7.96155E-05 | 0.048027257 |
| 603.279991 | 3051.857529 | 6.88762E-05 | 0.041551617 |
| 603.319991 | 2401.309324 | 5.41942E-05 | 0.032696448 |
| 603.359991 | 1668.928771 | 3.76654E-05 | 0.022725794 |
| 603.399991 | 1056.516243 | 2.38441E-05 | 0.01438753  |
| 603.439991 | 646.902389  | 1.45997E-05 | 0.008810034 |
| 603.479991 | 438.773024  | 9.9025E-06  | 0.005975958 |
| 603.519991 | 348.454698  | 7.86414E-06 | 0.004746164 |
| 603.559991 | 383.44122   | 8.65373E-06 | 0.005223048 |
| 603.599991 | 440.021178  | 9.93067E-06 | 0.005994149 |
| 603.639991 | 478.856967  | 1.08071E-05 | 0.006523619 |
| 603.679991 | 496.071427  | 1.11956E-05 | 0.006758585 |
| 603.719991 | 440.879634  | 9.95004E-06 | 0.006007038 |
| 603.759991 | 354.486136  | 8.00026E-06 | 0.004830236 |
| 603.799991 | 297.710336  | 6.71891E-06 | 0.004056876 |
| 603.839991 | 274.499404  | 6.19507E-06 | 0.003740831 |
| 603.879991 | 262.382932  | 5.92162E-06 | 0.003575946 |
| 603.919991 | 279.213326  | 6.30146E-06 | 0.003805575 |
| 603.959991 | 377.885335  | 8.52835E-06 | 0.00515078  |
| 603.999991 | 607.013827  | 1.36995E-05 | 0.008274472 |
| 604.039991 | 980.788826  | 2.2135E-05  | 0.013370448 |
| 604.079991 | 1458.568327 | 3.29179E-05 | 0.019885018 |
| 604.119991 | 1958.998103 | 4.42119E-05 | 0.026709268 |
| 604.159991 | 2414.152565 | 5.44841E-05 | 0.03291709  |
| 604.199991 | 2641.059294 | 5.9605E-05  | 0.036013358 |
| 604.239991 | 2563.988075 | 5.78656E-05 | 0.034964733 |
| 604.279991 | 2221.599725 | 5.01384E-05 | 0.030297639 |
| 604.319991 | 1739.36809  | 3.92551E-05 | 0.023722651 |
| 604.359991 | 1244.4589   | 2.80857E-05 | 0.016973876 |
| 604.399991 | 833.778766  | 1.88172E-05 | 0.011373131 |
| 604.439991 | 555.234632  | 1.25309E-05 | 0.00757416  |
| 604.479991 | 403.70445   | 9.11105E-06 | 0.005507446 |



|            |             |             |             |
|------------|-------------|-------------|-------------|
| 604.519991 | 341.754744  | 7.71293E-06 | 0.004662619 |
| 604.559991 | 363.783171  | 8.21008E-06 | 0.004963486 |
| 604.599991 | 405.711277  | 9.15634E-06 | 0.005535922 |
| 604.639991 | 436.390293  | 9.84872E-06 | 0.005954931 |
| 604.679991 | 510.704196  | 1.15259E-05 | 0.00696947  |
| 604.719991 | 556.425508  | 1.25577E-05 | 0.007593922 |
| 604.759991 | 519.129091  | 1.1716E-05  | 0.00708538  |
| 604.799991 | 423.0525    | 9.54771E-06 | 0.005774452 |
| 604.839991 | 334.761971  | 7.55511E-06 | 0.004569634 |
| 604.879991 | 328.602682  | 7.4161E-06  | 0.004485853 |
| 604.919991 | 401.119482  | 9.05271E-06 | 0.005476164 |
| 604.959991 | 583.362456  | 1.31657E-05 | 0.007964708 |
| 604.999991 | 983.954963  | 2.22065E-05 | 0.013434928 |
| 605.039991 | 1609.159995 | 3.63165E-05 | 0.021972935 |
| 605.079991 | 2384.503273 | 5.38149E-05 | 0.03256233  |
| 605.119991 | 3162.19688  | 7.13664E-05 | 0.043185223 |
| 605.159991 | 3835.441794 | 8.65606E-05 | 0.052382999 |
| 605.199991 | 4131.685486 | 9.32464E-05 | 0.056432712 |
| 605.239991 | 3921.577189 | 8.85045E-05 | 0.053566484 |
| 605.279991 | 3355.707306 | 7.57336E-05 | 0.045840057 |
| 605.319991 | 2580.980184 | 5.82491E-05 | 0.035259361 |
| 605.359991 | 1766.395994 | 3.98651E-05 | 0.024132735 |
| 605.399991 | 1104.55858  | 2.49283E-05 | 0.015091622 |
| 605.439991 | 686.559869  | 1.54947E-05 | 0.009381111 |
| 605.479991 | 455.620618  | 1.02827E-05 | 0.006225983 |
| 605.519991 | 349.733513  | 7.893E-06   | 0.004779368 |
| 605.559991 | 390.954083  | 8.82329E-06 | 0.005343031 |
| 605.599991 | 484.016945  | 1.09236E-05 | 0.006615325 |
| 605.639991 | 492.35704   | 1.11118E-05 | 0.006729758 |
| 605.679991 | 465.677102  | 1.05097E-05 | 0.006365505 |
| 605.719991 | 437.232288  | 9.86772E-06 | 0.005977078 |
| 605.759991 | 381.143089  | 8.60187E-06 | 0.005210668 |
| 605.799991 | 330.896711  | 7.46788E-06 | 0.00452404  |
| 605.839991 | 284.381604  | 6.4181E-06  | 0.00388834  |
| 605.879991 | 256.958052  | 5.79919E-06 | 0.00351361  |
| 605.919991 | 287.835196  | 6.49604E-06 | 0.00393608  |
| 605.959991 | 384.996609  | 8.68884E-06 | 0.005265088 |
| 605.999991 | 599.95414   | 1.35401E-05 | 0.008205318 |
| 606.039991 | 972.559391  | 2.19493E-05 | 0.01330216  |
| 606.079991 | 1449.362652 | 3.27101E-05 | 0.019824935 |
| 606.119991 | 1953.937005 | 4.40976E-05 | 0.026728459 |
| 606.159991 | 2333.576893 | 5.26656E-05 | 0.031923768 |
| 606.199991 | 2448.630617 | 5.52622E-05 | 0.033499934 |
| 606.239991 | 2290.698167 | 5.16979E-05 | 0.031341314 |
| 606.279991 | 1988.641873 | 4.48809E-05 | 0.027210378 |
| 606.319991 | 1555.362108 | 3.51024E-05 | 0.02128326  |

|            |             |             |             |
|------------|-------------|-------------|-------------|
| 606.359991 | 1111.594506 | 2.50871E-05 | 0.015211838 |
| 606.399991 | 774.484823  | 1.7479E-05  | 0.010599292 |
| 606.439991 | 541.454727  | 1.22199E-05 | 0.007410623 |
| 606.479991 | 416.653573  | 9.40329E-06 | 0.005702908 |
| 606.519991 | 380.549474  | 8.58847E-06 | 0.00520908  |
| 606.559991 | 382.710714  | 8.63725E-06 | 0.005239009 |
| 606.599991 | 437.946678  | 9.88385E-06 | 0.005995541 |
| 606.639991 | 486.77761   | 1.09859E-05 | 0.006664482 |
| 606.679991 | 492.885591  | 1.11237E-05 | 0.006748551 |
| 606.719991 | 445.105809  | 1.00454E-05 | 0.006094756 |
| 606.759991 | 398.231809  | 8.98754E-06 | 0.005453278 |
| 606.799991 | 364.932875  | 8.23603E-06 | 0.004997621 |
| 606.839991 | 358.377824  | 8.08809E-06 | 0.004908175 |
| 606.879991 | 384.714393  | 8.68247E-06 | 0.005269216 |
| 606.919991 | 470.652168  | 1.0622E-05  | 0.006446682 |
| 606.959991 | 656.215425  | 1.48099E-05 | 0.008988997 |
| 606.999991 | 1077.686841 | 2.43219E-05 | 0.014763388 |
| 607.039991 | 1829.792755 | 4.12959E-05 | 0.025068247 |
| 607.079991 | 2834.206427 | 6.39641E-05 | 0.03883132  |
| 607.119991 | 3945.130671 | 8.90361E-05 | 0.054055599 |
| 607.159991 | 4775.736198 | 0.000107782 | 0.065440744 |
| 607.199991 | 5096.657074 | 0.000115024 | 0.069842846 |
| 607.239991 | 4943.90363  | 0.000111577 | 0.067754028 |
| 607.279991 | 4365.480623 | 9.85228E-05 | 0.059830935 |
| 607.319991 | 3341.712194 | 7.54178E-05 | 0.045802731 |
| 607.359991 | 2252.875774 | 5.08443E-05 | 0.030880774 |
| 607.399991 | 1379.025628 | 3.11227E-05 | 0.01890392  |
| 607.439991 | 826.577511  | 1.86547E-05 | 0.011331613 |
| 607.479991 | 519.997488  | 1.17356E-05 | 0.007129154 |
| 607.519991 | 404.815888  | 9.13613E-06 | 0.005550382 |
| 607.559991 | 398.623362  | 8.99637E-06 | 0.005465837 |
| 607.599991 | 435.144768  | 9.82061E-06 | 0.005967003 |
| 607.639991 | 487.961194  | 1.10126E-05 | 0.006691699 |
| 607.679991 | 500.671051  | 1.12994E-05 | 0.006866449 |
| 607.719991 | 466.314462  | 1.05241E-05 | 0.006395686 |
| 607.759991 | 420.707096  | 9.49477E-06 | 0.005770543 |
| 607.799991 | 371.463075  | 8.3834E-06  | 0.005095433 |
| 607.839991 | 341.601391  | 7.70947E-06 | 0.004686123 |
| 607.879991 | 317.194413  | 7.15864E-06 | 0.004351592 |
| 607.919991 | 320.517073  | 7.23362E-06 | 0.004397465 |
| 607.959991 | 446.794122  | 1.00835E-05 | 0.006130377 |
| 607.999991 | 670.775087  | 1.51385E-05 | 0.009204183 |
| 608.039991 | 1002.844191 | 2.26328E-05 | 0.013761645 |
| 608.079991 | 1507.673031 | 3.40261E-05 | 0.020690579 |
| 608.119991 | 2092.26939  | 4.72196E-05 | 0.028715186 |
| 608.159991 | 2595.28149  | 5.85719E-05 | 0.035621079 |

|            |             |             |             |
|------------|-------------|-------------|-------------|
| 608.199991 | 2876.807173 | 6.49255E-05 | 0.039487707 |
| 608.239991 | 2773.27223  | 6.25889E-05 | 0.038069067 |
| 608.279991 | 2447.087659 | 5.52274E-05 | 0.033593698 |
| 608.319991 | 2055.762457 | 4.63957E-05 | 0.028223429 |
| 608.359991 | 1618.073248 | 3.65177E-05 | 0.022215883 |
| 608.399991 | 1163.781098 | 2.62649E-05 | 0.015979576 |
| 608.439991 | 780.383916  | 1.76122E-05 | 0.010715953 |
| 608.479991 | 537.940625  | 1.21406E-05 | 0.007387294 |
| 608.519991 | 420.150343  | 9.48221E-06 | 0.005770113 |
| 608.559991 | 419.713184  | 9.47234E-06 | 0.005764488 |
| 608.599991 | 504.784161  | 1.13923E-05 | 0.006933339 |
| 608.639991 | 568.381621  | 1.28276E-05 | 0.007807379 |
| 608.679991 | 596.067081  | 1.34524E-05 | 0.008188209 |
| 608.719991 | 578.664079  | 1.30596E-05 | 0.007949665 |
| 608.759991 | 556.806026  | 1.25663E-05 | 0.007649883 |
| 608.799991 | 536.308912  | 1.21037E-05 | 0.00736876  |
| 608.839991 | 527.326426  | 1.1901E-05  | 0.007245819 |
| 608.879991 | 564.5139    | 1.27403E-05 | 0.007757309 |
| 608.919991 | 749.889985  | 1.6924E-05  | 0.010305345 |
| 608.959991 | 1077.443043 | 2.43164E-05 | 0.014807708 |
| 608.999991 | 1585.961414 | 3.57929E-05 | 0.0217979   |
| 609.039991 | 2400.957194 | 5.41863E-05 | 0.033001599 |
| 609.079991 | 3520.95763  | 7.94631E-05 | 0.04839939  |
| 609.119991 | 4640.582588 | 0.000104731 | 0.063794041 |
| 609.159991 | 5272.755197 | 0.000118999 | 0.072489272 |
| 609.199991 | 5232.646423 | 0.000118094 | 0.071942584 |
| 609.239991 | 4718.633959 | 0.000106493 | 0.064879792 |
| 609.279991 | 3843.642612 | 8.67457E-05 | 0.052852395 |
| 609.319991 | 2812.110828 | 6.34654E-05 | 0.038670752 |
| 609.359991 | 1911.192517 | 4.3133E-05  | 0.026283496 |
| 609.399991 | 1225.50324  | 2.76579E-05 | 0.016854725 |
| 609.439991 | 763.693678  | 1.72355E-05 | 0.010504005 |
| 609.479991 | 486.055859  | 1.09696E-05 | 0.006685754 |
| 609.519991 | 377.692757  | 8.524E-06   | 0.005195548 |
| 609.559991 | 384.561094  | 8.67901E-06 | 0.005290376 |
| 609.599991 | 446.134457  | 1.00686E-05 | 0.006137839 |
| 609.639991 | 468.145461  | 1.05654E-05 | 0.006441085 |
| 609.679991 | 455.302155  | 1.02755E-05 | 0.006264788 |
| 609.719991 | 456.674664  | 1.03065E-05 | 0.006284086 |
| 609.759991 | 448.962036  | 1.01324E-05 | 0.006178361 |
| 609.799991 | 403.655087  | 9.10993E-06 | 0.005555237 |
| 609.839991 | 352.873046  | 7.96385E-06 | 0.004856676 |
| 609.879991 | 355.73192   | 8.02837E-06 | 0.004896345 |
| 609.919991 | 429.004755  | 9.68204E-06 | 0.00590527  |
| 609.959991 | 589.632224  | 1.33072E-05 | 0.008116846 |
| 609.999991 | 865.349969  | 1.95297E-05 | 0.011913143 |

|            |             |             |             |
|------------|-------------|-------------|-------------|
| 610.039991 | 1267.167534 | 2.85982E-05 | 0.017446049 |
| 610.079991 | 1773.509411 | 4.00256E-05 | 0.02441884  |
| 610.119991 | 2295.058533 | 5.17963E-05 | 0.031601942 |
| 610.159991 | 2714.246164 | 6.12568E-05 | 0.037376421 |
| 610.199991 | 2847.830624 | 6.42716E-05 | 0.039218512 |
| 610.239991 | 2642.566389 | 5.9639E-05  | 0.036394129 |
| 610.279991 | 2222.795411 | 5.01654E-05 | 0.030614938 |
| 610.319991 | 1712.463851 | 3.86479E-05 | 0.023587601 |
| 610.359991 | 1208.654028 | 2.72776E-05 | 0.016649179 |
| 610.399991 | 790.783286  | 1.78469E-05 | 0.010893734 |
| 610.439991 | 524.217801  | 1.18309E-05 | 0.007222033 |
| 610.479991 | 397.781491  | 8.97737E-06 | 0.005480507 |
| 610.519991 | 377.460114  | 8.51875E-06 | 0.005200867 |
| 610.559991 | 424.496332  | 9.58029E-06 | 0.005849342 |
| 610.599991 | 481.493086  | 1.08666E-05 | 0.006635163 |
| 610.639991 | 549.215078  | 1.2395E-05  | 0.007568894 |
| 610.679991 | 606.499679  | 1.36879E-05 | 0.008358898 |
| 610.719991 | 566.907301  | 1.27943E-05 | 0.00781374  |
| 610.759991 | 540.366203  | 1.21953E-05 | 0.007448409 |
| 610.799991 | 506.038677  | 1.14206E-05 | 0.006975695 |
| 610.839991 | 485.671873  | 1.09609E-05 | 0.006695379 |
| 610.879991 | 545.798324  | 1.23179E-05 | 0.007524763 |
| 610.919991 | 705.48573   | 1.59218E-05 | 0.009726964 |
| 610.959991 | 979.051282  | 2.20958E-05 | 0.013499664 |
| 610.999991 | 1485.37686  | 3.35229E-05 | 0.020482484 |
| 611.039991 | 2298.107802 | 5.18651E-05 | 0.031691645 |
| 611.079991 | 3355.533446 | 7.57297E-05 | 0.046276914 |
| 611.119991 | 4354.085877 | 9.82657E-05 | 0.060052105 |
| 611.159991 | 5050.875737 | 0.000113991 | 0.069666879 |
| 611.199991 | 5116.189237 | 0.000115465 | 0.070572369 |
| 611.239991 | 4569.10124  | 0.000103118 | 0.063029999 |
| 611.279991 | 3678.835224 | 8.30262E-05 | 0.050752247 |
| 611.319991 | 2675.452197 | 6.03812E-05 | 0.036912253 |
| 611.359991 | 1818.13776  | 4.10328E-05 | 0.025085835 |
| 611.399991 | 1160.36939  | 2.61879E-05 | 0.016011295 |
| 611.439991 | 706.19083   | 1.59377E-05 | 0.009744974 |
| 611.479991 | 458.644222  | 1.0351E-05  | 0.006329406 |
| 611.519991 | 407.486954  | 9.19641E-06 | 0.00562379  |
| 611.559991 | 452.616694  | 1.02149E-05 | 0.006247041 |
| 611.599991 | 494.046518  | 1.11499E-05 | 0.006819304 |
| 611.639991 | 504.503692  | 1.13859E-05 | 0.0069641   |
| 611.679991 | 508.447252  | 1.14749E-05 | 0.007018995 |
| 611.719991 | 513.930577  | 1.15987E-05 | 0.007095155 |
| 611.759991 | 476.820915  | 1.07612E-05 | 0.006583262 |
| 611.799991 | 405.508155  | 9.15175E-06 | 0.005599043 |
| 611.839991 | 347.005896  | 7.83144E-06 | 0.004791588 |

|            |             |             |             |
|------------|-------------|-------------|-------------|
| 611.879991 | 338.94777   | 7.64958E-06 | 0.004680624 |
| 611.919991 | 418.638732  | 9.44809E-06 | 0.005781477 |
| 611.959991 | 543.181807  | 1.22589E-05 | 0.00750193  |
| 611.999991 | 770.139923  | 1.7381E-05  | 0.010637163 |
| 612.039991 | 1174.787091 | 2.65133E-05 | 0.016227205 |
| 612.079991 | 1671.269359 | 3.77182E-05 | 0.023086569 |
| 612.119991 | 2179.26505  | 4.9183E-05  | 0.030105883 |
| 612.159991 | 2626.592901 | 5.92785E-05 | 0.036287952 |
| 612.199991 | 2750.076224 | 6.20654E-05 | 0.037996431 |
| 612.239991 | 2582.460307 | 5.82825E-05 | 0.035682897 |
| 612.279991 | 2176.40015  | 4.91183E-05 | 0.030074164 |
| 612.319991 | 1682.594552 | 3.79738E-05 | 0.023252126 |
| 612.359991 | 1206.419603 | 2.72272E-05 | 0.016672854 |
| 612.399991 | 824.713995  | 1.86126E-05 | 0.011398384 |
| 612.439991 | 567.55484   | 1.28089E-05 | 0.007844696 |
| 612.479991 | 435.220572  | 9.82232E-06 | 0.006015976 |
| 612.519991 | 395.680221  | 8.92995E-06 | 0.005469774 |
| 612.559991 | 403.377569  | 9.10367E-06 | 0.005576544 |
| 612.599991 | 451.351984  | 1.01864E-05 | 0.00624018  |
| 612.639991 | 496.57604   | 1.1207E-05  | 0.006865874 |
| 612.679991 | 539.051698  | 1.21656E-05 | 0.007453648 |
| 612.719991 | 553.318597  | 1.24876E-05 | 0.007651421 |
| 612.759991 | 517.556447  | 1.16805E-05 | 0.00715736  |
| 612.799991 | 455.92359   | 1.02896E-05 | 0.006305443 |
| 612.839991 | 437.04798   | 9.86356E-06 | 0.006044787 |
| 612.879991 | 468.978446  | 1.05842E-05 | 0.006486838 |
| 612.919991 | 599.047145  | 1.35197E-05 | 0.00828647  |
| 612.959991 | 858.912844  | 1.93845E-05 | 0.011881902 |
| 612.999991 | 1209.416669 | 2.72948E-05 | 0.016731743 |
| 613.039991 | 1775.036819 | 4.00601E-05 | 0.024558449 |
| 613.079991 | 2495.676968 | 5.6324E-05  | 0.034531089 |
| 613.119991 | 3203.798019 | 7.23053E-05 | 0.0443318   |
| 613.159991 | 3723.40998  | 8.40322E-05 | 0.051525169 |
| 613.199991 | 3825.942417 | 8.63462E-05 | 0.052947484 |
| 613.239991 | 3593.331436 | 8.10965E-05 | 0.049731608 |
| 613.279991 | 3076.05309  | 6.94222E-05 | 0.042575267 |
| 613.319991 | 2428.085117 | 5.47985E-05 | 0.033609015 |
| 613.359991 | 1762.747295 | 3.97828E-05 | 0.024401148 |
| 613.399991 | 1174.57452  | 2.65085E-05 | 0.01626032  |
| 613.439991 | 745.128556  | 1.68165E-05 | 0.010315922 |
| 613.479991 | 494.686834  | 1.11644E-05 | 0.006849132 |
| 613.519991 | 390.207294  | 8.80644E-06 | 0.005402924 |
| 613.559991 | 387.527256  | 8.74595E-06 | 0.005366165 |
| 613.599991 | 410.382094  | 9.26175E-06 | 0.005683011 |
| 613.639991 | 458.73388   | 1.0353E-05  | 0.006353005 |
| 613.679991 | 498.173058  | 1.12431E-05 | 0.006899648 |

|            |             |             |             |
|------------|-------------|-------------|-------------|
| 613.719991 | 479.434323  | 1.08202E-05 | 0.006640551 |
| 613.759991 | 430.989794  | 9.72684E-06 | 0.005969945 |
| 613.799991 | 370.148697  | 8.35374E-06 | 0.005127526 |
| 613.839991 | 330.65389   | 7.4624E-06  | 0.004580718 |
| 613.879991 | 318.891272  | 7.19693E-06 | 0.004418052 |
| 613.919991 | 329.569039  | 7.43791E-06 | 0.004566284 |
| 613.959991 | 390.850066  | 8.82094E-06 | 0.005415705 |
| 613.999991 | 556.393548  | 1.2557E-05  | 0.007710015 |
| 614.039991 | 908.244456  | 2.04978E-05 | 0.012586476 |
| 614.079991 | 1409.554175 | 3.18117E-05 | 0.019534913 |
| 614.119991 | 1956.052207 | 4.41454E-05 | 0.027110557 |
| 614.159991 | 2369.030455 | 5.34657E-05 | 0.032836505 |
| 614.199991 | 2529.633089 | 5.70903E-05 | 0.035064859 |
| 614.239991 | 2436.218958 | 5.49821E-05 | 0.033772185 |
| 614.279991 | 2199.840581 | 4.96473E-05 | 0.030497366 |
| 614.319991 | 1821.03042  | 4.10981E-05 | 0.025247397 |
| 614.359991 | 1376.710588 | 3.10704E-05 | 0.019088435 |
| 614.399991 | 968.299707  | 2.18532E-05 | 0.013426591 |
| 614.439991 | 630.879574  | 1.42381E-05 | 0.008748442 |
| 614.479991 | 443.095115  | 1E-05       | 0.006144824 |
| 614.519991 | 375.749171  | 8.48014E-06 | 0.005211213 |
| 614.559991 | 360.063474  | 8.12613E-06 | 0.004993995 |
| 614.599991 | 410.942835  | 9.27441E-06 | 0.005700051 |
| 614.639991 | 472.980939  | 1.06745E-05 | 0.006560987 |
| 614.679991 | 495.159726  | 1.11751E-05 | 0.006869089 |
| 614.719991 | 475.753582  | 1.07371E-05 | 0.006600307 |
| 614.759991 | 424.204477  | 9.5737E-06  | 0.00588553  |
| 614.799991 | 376.292319  | 8.49239E-06 | 0.005221123 |
| 614.839991 | 381.677564  | 8.61393E-06 | 0.005296189 |
| 614.879991 | 370.992845  | 8.37279E-06 | 0.005148262 |
| 614.919991 | 424.922349  | 9.58991E-06 | 0.005897025 |
| 614.959991 | 589.906435  | 1.33134E-05 | 0.008187188 |
| 614.999991 | 899.752985  | 2.03062E-05 | 0.012488295 |
| 615.039991 | 1379.269281 | 3.11282E-05 | 0.01914508  |
| 615.079991 | 2004.128979 | 4.52304E-05 | 0.027820314 |
| 615.119991 | 2640.111494 | 5.95836E-05 | 0.036651088 |
| 615.159991 | 3085.569076 | 6.9637E-05  | 0.042837894 |
| 615.199991 | 3220.805031 | 7.26891E-05 | 0.044718323 |
| 615.239991 | 3047.023094 | 6.87671E-05 | 0.04230825  |
| 615.279991 | 2617.814715 | 5.90804E-05 | 0.036351008 |
| 615.319991 | 2063.859996 | 4.65784E-05 | 0.028660649 |
| 615.359991 | 1536.568014 | 3.46782E-05 | 0.021339577 |
| 615.399991 | 1060.279814 | 2.3929E-05  | 0.01472593  |
| 615.439991 | 684.691935  | 1.54525E-05 | 0.009510113 |
| 615.479991 | 458.42417   | 1.0346E-05  | 0.006367753 |
| 615.519991 | 352.910729  | 7.9647E-06  | 0.004902434 |

|            |             |             |             |
|------------|-------------|-------------|-------------|
| 615.559991 | 338.135548  | 7.63125E-06 | 0.004697491 |
| 615.599991 | 378.480908  | 8.54179E-06 | 0.005258324 |
| 615.639991 | 417.456075  | 9.4214E-06  | 0.005800192 |
| 615.679991 | 435.143845  | 9.82059E-06 | 0.006046341 |
| 615.719991 | 427.155311  | 9.6403E-06  | 0.005935726 |
| 615.759991 | 397.367271  | 8.96803E-06 | 0.005522151 |
| 615.799991 | 379.00048   | 8.55351E-06 | 0.005267253 |
| 615.839991 | 342.673558  | 7.73366E-06 | 0.0047627   |
| 615.879991 | 301.46826   | 6.80372E-06 | 0.004190274 |
| 615.919991 | 305.019816  | 6.88387E-06 | 0.004239915 |
| 615.959991 | 400.604971  | 9.0411E-06  | 0.005568954 |
| 615.999991 | 604.686219  | 1.36469E-05 | 0.008406506 |
| 616.039991 | 904.807895  | 2.04203E-05 | 0.012579693 |
| 616.079991 | 1315.133656 | 2.96807E-05 | 0.018285707 |
| 616.119991 | 1791.616156 | 4.04343E-05 | 0.024912369 |
| 616.159991 | 2149.954593 | 4.85215E-05 | 0.029896995 |
| 616.199991 | 2314.508456 | 5.22352E-05 | 0.032187349 |
| 616.239991 | 2287.30904  | 5.16214E-05 | 0.031811158 |
| 616.279991 | 2026.141128 | 4.57272E-05 | 0.028180748 |
| 616.319991 | 1581.801935 | 3.56991E-05 | 0.022002048 |
| 616.359991 | 1100.986561 | 2.48477E-05 | 0.015315149 |
| 616.399991 | 714.033987  | 1.61148E-05 | 0.009933133 |
| 616.439991 | 465.47951   | 1.05052E-05 | 0.00647584  |
| 616.479991 | 368.040354  | 8.30616E-06 | 0.00512058  |
| 616.519991 | 342.693276  | 7.73411E-06 | 0.004768233 |
| 616.559991 | 356.710524  | 8.05046E-06 | 0.004963591 |
| 616.599991 | 402.20971   | 9.07731E-06 | 0.005597071 |
| 616.639991 | 462.637465  | 1.04411E-05 | 0.006438389 |
| 616.679991 | 492.687817  | 1.11193E-05 | 0.006857036 |
| 616.719991 | 467.198072  | 1.0544E-05  | 0.006502702 |
| 616.759991 | 408.979413  | 9.2301E-06  | 0.005692754 |
| 616.799991 | 366.547378  | 8.27246E-06 | 0.005102456 |
| 616.839991 | 357.080471  | 8.05881E-06 | 0.004970996 |
| 616.879991 | 369.622877  | 8.34187E-06 | 0.005145935 |
| 616.919991 | 421.247443  | 9.50697E-06 | 0.005865039 |
| 616.959991 | 607.779887  | 1.37167E-05 | 0.008462683 |
| 616.999991 | 969.200526  | 2.18735E-05 | 0.013495953 |
| 617.039991 | 1466.949331 | 3.3107E-05  | 0.020428345 |
| 617.079991 | 2030.99888  | 4.58368E-05 | 0.028284982 |
| 617.119991 | 2610.144939 | 5.89073E-05 | 0.036352894 |
| 617.159991 | 3059.195333 | 6.90418E-05 | 0.042609823 |
| 617.199991 | 3204.379177 | 7.23184E-05 | 0.0446349   |
| 617.239991 | 3004.445238 | 6.78061E-05 | 0.041852664 |
| 617.279991 | 2634.326742 | 5.94531E-05 | 0.0366992   |
| 617.319991 | 2120.099704 | 4.78477E-05 | 0.02953734  |
| 617.359991 | 1573.115208 | 3.5503E-05  | 0.021918144 |

|            |             |             |             |
|------------|-------------|-------------|-------------|
| 617.399991 | 1083.337679 | 2.44494E-05 | 0.015095073 |
| 617.439991 | 719.460378  | 1.62372E-05 | 0.010025508 |
| 617.479991 | 468.348616  | 1.057E-05   | 0.006526749 |
| 617.519991 | 353.106142  | 7.96911E-06 | 0.004921087 |
| 617.559991 | 353.817271  | 7.98516E-06 | 0.004931317 |
| 617.599991 | 401.557904  | 9.0626E-06  | 0.005597063 |
| 617.639991 | 456.75121   | 1.03082E-05 | 0.00636678  |
| 617.679991 | 481.597159  | 1.0869E-05  | 0.00671355  |
| 617.719991 | 460.188109  | 1.03858E-05 | 0.006415519 |
| 617.759991 | 421.524251  | 9.51322E-06 | 0.005876884 |
| 617.799991 | 370.193126  | 8.35474E-06 | 0.00516156  |
| 617.839991 | 320.279705  | 7.22827E-06 | 0.004465912 |
| 617.879991 | 273.755977  | 6.17829E-06 | 0.003817442 |
| 617.919991 | 279.170644  | 6.30049E-06 | 0.0038932   |
| 617.959991 | 383.085921  | 8.64572E-06 | 0.005342706 |
| 617.999991 | 578.887052  | 1.30647E-05 | 0.008073969 |
| 618.039991 | 817.362139  | 1.84467E-05 | 0.011400814 |
| 618.079991 | 1168.757032 | 2.63772E-05 | 0.016303231 |
| 618.119991 | 1639.936708 | 3.70111E-05 | 0.022877293 |
| 618.159991 | 2071.548888 | 4.6752E-05  | 0.028900199 |
| 618.199991 | 2225.503394 | 5.02265E-05 | 0.031050029 |
| 618.239991 | 2114.631331 | 4.77243E-05 | 0.029505061 |
| 618.279991 | 1812.230496 | 4.08995E-05 | 0.025287354 |
| 618.319991 | 1461.520753 | 3.29845E-05 | 0.020394968 |
| 618.359991 | 1105.847143 | 2.49574E-05 | 0.015432676 |
| 618.399991 | 783.666313  | 1.76863E-05 | 0.010937181 |
| 618.439991 | 561.489342  | 1.2672E-05  | 0.007836892 |
| 618.479991 | 402.950136  | 9.09402E-06 | 0.005624471 |
| 618.519991 | 312.613107  | 7.05524E-06 | 0.004363808 |
| 618.559991 | 336.262677  | 7.58898E-06 | 0.00469424  |
| 618.599991 | 401.762578  | 9.06722E-06 | 0.005608983 |
| 618.639991 | 460.782021  | 1.03992E-05 | 0.006433366 |
| 618.679991 | 492.782951  | 1.11214E-05 | 0.006880603 |
| 618.719991 | 472.42854   | 1.06621E-05 | 0.006596826 |
| 618.759991 | 442.67667   | 9.9906E-06  | 0.006181781 |
| 618.799991 | 400.424034  | 9.03701E-06 | 0.005592103 |
| 618.839991 | 373.755424  | 8.43514E-06 | 0.005220002 |
| 618.879991 | 361.093835  | 8.14938E-06 | 0.005043491 |
| 618.919991 | 393.538873  | 8.88162E-06 | 0.005497015 |
| 618.959991 | 524.66157   | 1.18409E-05 | 0.007329031 |
| 618.999991 | 832.205241  | 1.87817E-05 | 0.01162588  |
| 619.039991 | 1361.467962 | 3.07264E-05 | 0.019020892 |
| 619.079991 | 2074.500523 | 4.68186E-05 | 0.028984451 |
| 619.119991 | 2830.94469  | 6.38905E-05 | 0.039555872 |
| 619.159991 | 3414.426472 | 7.70588E-05 | 0.047711757 |
| 619.199991 | 3683.775505 | 8.31377E-05 | 0.051478852 |



|            |             |             |             |
|------------|-------------|-------------|-------------|
| 619.239991 | 3561.106768 | 8.03692E-05 | 0.049767835 |
| 619.279991 | 3106.991461 | 7.01205E-05 | 0.043424204 |
| 619.319991 | 2428.369081 | 5.48049E-05 | 0.033941775 |
| 619.359991 | 1719.758754 | 3.88126E-05 | 0.024038947 |
| 619.399991 | 1129.201197 | 2.54845E-05 | 0.015785098 |
| 619.439991 | 715.36862   | 1.61449E-05 | 0.01000078  |
| 619.479991 | 477.367256  | 1.07735E-05 | 0.006673976 |
| 619.519991 | 374.920333  | 8.46143E-06 | 0.005242025 |
| 619.559991 | 355.321626  | 8.01911E-06 | 0.004968322 |
| 619.599991 | 368.918508  | 8.32598E-06 | 0.005158775 |
| 619.639991 | 422.581502  | 9.53708E-06 | 0.005909554 |
| 619.679991 | 444.705939  | 1.00364E-05 | 0.006219352 |
| 619.719991 | 429.22496   | 9.68701E-06 | 0.006003233 |
| 619.759991 | 382.073212  | 8.62286E-06 | 0.005344104 |
| 619.799991 | 336.323988  | 7.59036E-06 | 0.004704508 |
| 619.839991 | 287.211761  | 6.48197E-06 | 0.004017784 |
| 619.879991 | 269.726263  | 6.08735E-06 | 0.003773424 |
| 619.919991 | 273.133678  | 6.16425E-06 | 0.00382134  |
| 619.959991 | 346.314332  | 7.81583E-06 | 0.004845503 |
| 619.999991 | 556.145886  | 1.25514E-05 | 0.007781891 |
| 620.039991 | 877.339534  | 1.98003E-05 | 0.012276997 |
| 620.079991 | 1266.728263 | 2.85883E-05 | 0.017727028 |
| 620.119991 | 1652.899913 | 3.73036E-05 | 0.023132738 |
| 620.159991 | 2009.44472  | 4.53504E-05 | 0.028124484 |
| 620.199991 | 2271.571328 | 5.12662E-05 | 0.031795297 |
| 620.239991 | 2387.369373 | 5.38796E-05 | 0.033418283 |
| 620.279991 | 2325.746493 | 5.24889E-05 | 0.032557789 |
| 620.319991 | 2119.370819 | 4.78312E-05 | 0.029670679 |
| 620.359991 | 1832.914036 | 4.13663E-05 | 0.025662008 |
| 620.399991 | 1489.331748 | 3.36121E-05 | 0.020852973 |
| 620.439991 | 1154.485716 | 2.60551E-05 | 0.016165647 |
| 620.479991 | 840.910794  | 1.89782E-05 | 0.011775584 |
| 620.519991 | 580.341384  | 1.30975E-05 | 0.008127259 |
| 620.559991 | 429.878319  | 9.70175E-06 | 0.006020521 |
| 620.599991 | 419.126777  | 9.45911E-06 | 0.005870322 |
| 620.639991 | 448.606402  | 1.01244E-05 | 0.006283621 |
| 620.679991 | 466.142681  | 1.05202E-05 | 0.006529672 |
| 620.719991 | 464.327401  | 1.04792E-05 | 0.006504663 |
| 620.759991 | 431.270561  | 9.73318E-06 | 0.006041966 |
| 620.799991 | 400.965766  | 9.04924E-06 | 0.005617767 |
| 620.839991 | 353.029519  | 7.96738E-06 | 0.004946471 |
| 620.879991 | 327.310323  | 7.38694E-06 | 0.004586402 |
| 620.919991 | 373.423272  | 8.42764E-06 | 0.005232892 |
| 620.959991 | 525.647512  | 1.18631E-05 | 0.00736653  |
| 620.999991 | 845.822325  | 1.9089E-05  | 0.011854289 |
| 621.039991 | 1415.057791 | 3.19359E-05 | 0.019833461 |

|            |             |             |             |
|------------|-------------|-------------|-------------|
| 621.079991 | 2123.409854 | 4.79224E-05 | 0.029763645 |
| 621.119991 | 2900.237601 | 6.54543E-05 | 0.040654988 |
| 621.159991 | 3456.732591 | 7.80136E-05 | 0.048458952 |
| 621.199991 | 3656.300616 | 8.25176E-05 | 0.05125994  |
| 621.239991 | 3545.538779 | 8.00179E-05 | 0.049710302 |
| 621.279991 | 3132.497068 | 7.06961E-05 | 0.04392207  |
| 621.319991 | 2523.864692 | 5.69601E-05 | 0.035390455 |
| 621.359991 | 1901.732403 | 4.29195E-05 | 0.02666843  |
| 621.399991 | 1358.614532 | 3.0662E-05  | 0.01905339  |
| 621.439991 | 917.424203  | 2.0705E-05  | 0.012866907 |
| 621.479991 | 612.024025  | 1.38125E-05 | 0.008584211 |
| 621.519991 | 435.883758  | 9.83729E-06 | 0.006114072 |
| 621.559991 | 359.401683  | 8.1112E-06  | 0.005041595 |
| 621.599991 | 370.07286   | 8.35203E-06 | 0.005191621 |
| 621.639991 | 418.546893  | 9.44602E-06 | 0.005872024 |
| 621.679991 | 454.04208   | 1.02471E-05 | 0.006370415 |
| 621.719991 | 456.880352  | 1.03112E-05 | 0.00641065  |
| 621.759991 | 442.105338  | 9.9777E-06  | 0.006203736 |
| 621.799991 | 395.218057  | 8.91952E-06 | 0.005546158 |
| 621.839991 | 311.960407  | 7.04051E-06 | 0.004378072 |
| 621.879991 | 253.175346  | 5.71381E-06 | 0.003553307 |
| 621.919991 | 249.483217  | 5.63049E-06 | 0.003501713 |
| 621.959991 | 323.734768  | 7.30624E-06 | 0.004544191 |
| 621.999991 | 517.466112  | 1.16785E-05 | 0.00726402  |
| 622.039991 | 844.851739  | 1.90671E-05 | 0.011860515 |
| 622.079991 | 1288.546799 | 2.90807E-05 | 0.018090526 |
| 622.119991 | 1779.936215 | 4.01707E-05 | 0.024990984 |
| 622.159991 | 2230.719118 | 5.03442E-05 | 0.031322162 |
| 622.199991 | 2440.290735 | 5.5074E-05  | 0.034267019 |
| 622.239991 | 2309.342762 | 5.21186E-05 | 0.032430308 |
| 622.279991 | 1993.066975 | 4.49807E-05 | 0.027990618 |
| 622.319991 | 1643.191042 | 3.70845E-05 | 0.023078446 |
| 622.359991 | 1272.380385 | 2.87159E-05 | 0.017871598 |
| 622.399991 | 908.653542  | 2.0507E-05  | 0.012763584 |
| 622.439991 | 637.256786  | 1.4382E-05  | 0.008951931 |
| 622.479991 | 458.153537  | 1.03399E-05 | 0.006436373 |
| 622.519991 | 370.752054  | 8.36736E-06 | 0.005208847 |
| 622.559991 | 365.324851  | 8.24487E-06 | 0.005132928 |
| 622.599991 | 383.293864  | 8.65041E-06 | 0.005385744 |
| 622.639991 | 427.268306  | 9.64285E-06 | 0.006004024 |
| 622.679991 | 478.67527   | 1.0803E-05  | 0.006726833 |
| 622.719991 | 478.188955  | 1.07921E-05 | 0.006720431 |
| 622.759991 | 430.136511  | 9.70758E-06 | 0.006045494 |
| 622.799991 | 373.724862  | 8.43445E-06 | 0.005252975 |
| 622.839991 | 336.187808  | 7.58729E-06 | 0.004725668 |
| 622.879991 | 336.763944  | 7.60029E-06 | 0.004734071 |

|            |             |             |             |
|------------|-------------|-------------|-------------|
| 622.919991 | 407.963392  | 9.20717E-06 | 0.005735327 |
| 622.959991 | 556.899588  | 1.25684E-05 | 0.00782964  |
| 622.999991 | 916.399213  | 2.06819E-05 | 0.012884795 |
| 623.039991 | 1572.84392  | 3.54969E-05 | 0.022115986 |
| 623.079991 | 2566.824148 | 5.79296E-05 | 0.036094803 |
| 623.119991 | 3735.330641 | 8.43012E-05 | 0.052529769 |
| 623.159991 | 4711.584297 | 0.000106334 | 0.066263029 |
| 623.199991 | 5259.474154 | 0.000118699 | 0.073973219 |
| 623.239991 | 5193.071648 | 0.0001172   | 0.073043972 |
| 623.279991 | 4623.105689 | 0.000104337 | 0.065031199 |
| 623.319991 | 3643.809168 | 8.22357E-05 | 0.051259154 |
| 623.359991 | 2493.555902 | 5.62761E-05 | 0.035080259 |
| 623.399991 | 1521.603406 | 3.43405E-05 | 0.021407848 |
| 623.439991 | 874.618691  | 1.97389E-05 | 0.012306036 |
| 623.479991 | 514.037908  | 1.16011E-05 | 0.007233066 |
| 623.519991 | 360.230745  | 8.12991E-06 | 0.005069159 |
| 623.559991 | 353.736806  | 7.98335E-06 | 0.004978096 |
| 623.599991 | 398.671775  | 8.99747E-06 | 0.00561082  |
| 623.639991 | 438.719921  | 9.9013E-06  | 0.006174845 |
| 623.679991 | 481.228946  | 1.08607E-05 | 0.006773581 |
| 623.719991 | 475.789748  | 1.07379E-05 | 0.00669745  |
| 623.759991 | 411.772258  | 9.29313E-06 | 0.00579668  |
| 623.799991 | 359.094886  | 8.10427E-06 | 0.005055444 |
| 623.839991 | 342.927312  | 7.73939E-06 | 0.004828142 |
| 623.879991 | 355.195137  | 8.01626E-06 | 0.005001184 |
| 623.919991 | 359.474636  | 8.11284E-06 | 0.005061764 |
| 623.959991 | 404.320342  | 9.12495E-06 | 0.005693602 |
| 623.999991 | 570.459396  | 1.28745E-05 | 0.008033672 |
| 624.039991 | 847.022797  | 1.91161E-05 | 0.011929226 |
| 624.079991 | 1294.04832  | 2.92049E-05 | 0.018226174 |
| 624.119991 | 1920.841319 | 4.33507E-05 | 0.027056047 |
| 624.159991 | 2469.784975 | 5.57396E-05 | 0.034790432 |
| 624.199991 | 2720.98187  | 6.14088E-05 | 0.038331354 |
| 624.239991 | 2730.006089 | 6.16124E-05 | 0.038460946 |
| 624.279991 | 2483.124774 | 5.60407E-05 | 0.034985067 |
| 624.319991 | 1961.30999  | 4.4264E-05  | 0.027634922 |
| 624.359991 | 1456.07544  | 3.28616E-05 | 0.020517465 |
| 624.399991 | 1047.000407 | 2.36293E-05 | 0.01475416  |
| 624.439991 | 734.285985  | 1.65718E-05 | 0.010348102 |
| 624.479991 | 567.349111  | 1.28043E-05 | 0.007996016 |
| 624.519991 | 513.750631  | 1.15946E-05 | 0.007241082 |
| 624.559991 | 558.330603  | 1.26007E-05 | 0.007869921 |
| 624.599991 | 654.515959  | 1.47715E-05 | 0.009226287 |
| 624.639991 | 744.096142  | 1.67932E-05 | 0.010489713 |
| 624.679991 | 781.259661  | 1.76319E-05 | 0.011014322 |
| 624.719991 | 783.117012  | 1.76739E-05 | 0.011041214 |

|            |             |             |             |
|------------|-------------|-------------|-------------|
| 624.759991 | 750.751708  | 1.69434E-05 | 0.010585571 |
| 624.799991 | 771.395293  | 1.74093E-05 | 0.010877341 |
| 624.839991 | 860.279807  | 1.94153E-05 | 0.012131466 |
| 624.879991 | 993.734943  | 2.24272E-05 | 0.014014317 |
| 624.919991 | 1242.059873 | 2.80316E-05 | 0.017517483 |
| 624.959991 | 1743.860757 | 3.93565E-05 | 0.024596243 |
| 624.999991 | 2725.934179 | 6.15205E-05 | 0.038450335 |
| 625.03999  | 4336.700795 | 9.78733E-05 | 0.061174724 |
| 625.07999  | 6171.037494 | 0.000139272 | 0.087055966 |
| 625.11999  | 7758.655496 | 0.000175102 | 0.10945979  |
| 625.15999  | 8504.151085 | 0.000191927 | 0.119984984 |
| 625.19999  | 8191.970311 | 0.000184881 | 0.115587824 |
| 625.23999  | 7053.317193 | 0.000159184 | 0.099527918 |
| 625.27999  | 5432.950699 | 0.000122614 | 0.076668162 |
| 625.31999  | 3706.488624 | 8.36503E-05 | 0.052308196 |
| 625.35999  | 2312.981301 | 5.22008E-05 | 0.032644271 |
| 625.39999  | 1367.666393 | 3.08663E-05 | 0.0193038   |
| 625.43999  | 821.419966  | 1.85383E-05 | 0.011594597 |
| 625.47999  | 561.207074  | 1.26657E-05 | 0.007922118 |
| 625.51999  | 471.95929   | 1.06515E-05 | 0.006662704 |
| 625.55999  | 431.073494  | 9.72873E-06 | 0.006085903 |
| 625.59999  | 406.274414  | 9.16905E-06 | 0.005736156 |
| 625.63999  | 432.730901  | 9.76613E-06 | 0.006110084 |
| 625.67999  | 499.910858  | 1.12823E-05 | 0.007059104 |
| 625.71999  | 553.464567  | 1.24909E-05 | 0.007815821 |
| 625.75999  | 542.272664  | 1.22383E-05 | 0.007658263 |
| 625.79999  | 489.348616  | 1.10439E-05 | 0.006911283 |
| 625.83999  | 450.172434  | 1.01598E-05 | 0.006358387 |
| 625.87999  | 453.691116  | 1.02392E-05 | 0.006408496 |
| 625.91999  | 505.83516   | 1.1416E-05  | 0.007145499 |
| 625.95999  | 704.847225  | 1.59074E-05 | 0.009957409 |
| 625.99999  | 1083.857879 | 2.44612E-05 | 0.015312688 |
| 626.03999  | 1700.756698 | 3.83837E-05 | 0.024029737 |
| 626.07999  | 2438.185659 | 5.50265E-05 | 0.034450962 |
| 626.11999  | 3149.800197 | 7.10866E-05 | 0.044508743 |
| 626.15999  | 3708.264624 | 8.36904E-05 | 0.05240356  |
| 626.19999  | 3772.862612 | 8.51483E-05 | 0.053319836 |
| 626.23999  | 3374.065179 | 7.6148E-05  | 0.047686892 |
| 626.27999  | 2686.699024 | 6.06351E-05 | 0.037974521 |
| 626.31999  | 1944.309631 | 4.38804E-05 | 0.027483147 |
| 626.35999  | 1335.943302 | 3.01504E-05 | 0.018884991 |
| 626.39999  | 879.513883  | 1.98494E-05 | 0.012433666 |
| 626.43999  | 579.38054   | 1.30758E-05 | 0.008191211 |
| 626.47999  | 431.972186  | 9.74901E-06 | 0.00610756  |
| 626.51999  | 379.880758  | 8.57338E-06 | 0.005371394 |
| 626.55999  | 399.116608  | 9.00751E-06 | 0.005643743 |

|           |             |             |             |
|-----------|-------------|-------------|-------------|
| 626.59999 | 465.525268  | 1.05063E-05 | 0.00658322  |
| 626.63999 | 518.474994  | 1.17013E-05 | 0.007332476 |
| 626.67999 | 519.139604  | 1.17163E-05 | 0.007342344 |
| 626.71999 | 508.204195  | 1.14695E-05 | 0.00718814  |
| 626.75999 | 494.74932   | 1.11658E-05 | 0.006998279 |
| 626.79999 | 457.986792  | 1.03361E-05 | 0.006478682 |
| 626.83999 | 435.210705  | 9.8221E-06  | 0.006156885 |
| 626.87999 | 469.433152  | 1.05945E-05 | 0.00664145  |
| 626.91999 | 582.830677  | 1.31537E-05 | 0.008246303 |
| 626.95999 | 838.239925  | 1.89179E-05 | 0.011860771 |
| 626.99999 | 1261.502635 | 2.84704E-05 | 0.017850914 |
| 627.03999 | 1890.369416 | 4.2663E-05  | 0.02675141  |
| 627.07999 | 2704.445234 | 6.10356E-05 | 0.03827418  |
| 627.11999 | 3518.645824 | 7.94109E-05 | 0.049800185 |
| 627.15999 | 4056.690708 | 9.15539E-05 | 0.057418917 |
| 627.19999 | 4074.129889 | 9.19474E-05 | 0.057669431 |
| 627.23999 | 3729.933016 | 8.41794E-05 | 0.052800682 |
| 627.27999 | 3079.731421 | 6.95052E-05 | 0.043599252 |
| 627.31999 | 2358.054873 | 5.3218E-05  | 0.033384724 |
| 627.35999 | 1703.29552  | 3.8441E-05  | 0.02411635  |
| 627.39999 | 1130.486773 | 2.55135E-05 | 0.016007177 |
| 627.43999 | 722.071897  | 1.62962E-05 | 0.010224861 |
| 627.47999 | 502.775135  | 1.13469E-05 | 0.007119974 |
| 627.51999 | 428.113422  | 9.66192E-06 | 0.00606305  |
| 627.55999 | 407.782986  | 9.20309E-06 | 0.005775494 |
| 627.59999 | 433.376492  | 9.7807E-06  | 0.00613837  |
| 627.63999 | 492.188392  | 1.1108E-05  | 0.006971829 |
| 627.67999 | 538.444082  | 1.21519E-05 | 0.007627525 |
| 627.71999 | 553.840771  | 1.24994E-05 | 0.007846133 |
| 627.75999 | 556.361516  | 1.25563E-05 | 0.007882346 |
| 627.79999 | 551.37535   | 1.24438E-05 | 0.007812201 |
| 627.83999 | 568.039776  | 1.28199E-05 | 0.008048825 |
| 627.87999 | 626.547863  | 1.41403E-05 | 0.008878419 |
| 627.91999 | 709.438678  | 1.6011E-05  | 0.010053654 |
| 627.95999 | 859.476306  | 1.93972E-05 | 0.012180655 |
| 627.99999 | 1138.897166 | 2.57033E-05 | 0.016141686 |
| 628.03999 | 1554.158687 | 3.50752E-05 | 0.022028626 |
| 628.07999 | 2096.6852   | 4.73193E-05 | 0.029720283 |
| 628.11999 | 2639.945801 | 5.95799E-05 | 0.037423326 |
| 628.15999 | 3023.937534 | 6.82461E-05 | 0.042869443 |
| 628.19999 | 3104.91746  | 7.00737E-05 | 0.044020274 |
| 628.23999 | 2883.249836 | 6.50709E-05 | 0.040880162 |
| 628.27999 | 2411.139125 | 5.44161E-05 | 0.034188516 |
| 628.31999 | 1788.649585 | 4.03673E-05 | 0.0253636   |
| 628.35999 | 1221.887421 | 2.75763E-05 | 0.017327842 |
| 628.39999 | 833.02061   | 1.88001E-05 | 0.011813992 |

|           |             |             |             |
|-----------|-------------|-------------|-------------|
| 628.43999 | 595.313094  | 1.34354E-05 | 0.008443335 |
| 628.47999 | 424.566412  | 9.58187E-06 | 0.006022015 |
| 628.51999 | 356.847984  | 8.05356E-06 | 0.005061825 |
| 628.55999 | 375.754144  | 8.48025E-06 | 0.005330344 |
| 628.59999 | 433.272842  | 9.77836E-06 | 0.00614668  |
| 628.63999 | 479.125053  | 1.08132E-05 | 0.006797601 |
| 628.67999 | 504.859667  | 1.1394E-05  | 0.007163167 |
| 628.71999 | 521.208067  | 1.17629E-05 | 0.007395596 |
| 628.75999 | 514.438497  | 1.16102E-05 | 0.007300004 |
| 628.79999 | 496.12784   | 1.11969E-05 | 0.00704062  |
| 628.83999 | 470.491019  | 1.06183E-05 | 0.006677229 |
| 628.87999 | 499.743063  | 1.12785E-05 | 0.007092826 |
| 628.91999 | 626.863     | 1.41474E-05 | 0.008897598 |
| 628.95999 | 852.874134  | 1.92482E-05 | 0.012106336 |
| 628.99999 | 1186.049485 | 2.67675E-05 | 0.016836748 |
| 629.03999 | 1725.758078 | 3.8948E-05  | 0.024499822 |
| 629.07999 | 2418.727552 | 5.45873E-05 | 0.034339786 |
| 629.11999 | 3115.275983 | 7.03074E-05 | 0.044231816 |
| 629.15999 | 3651.626268 | 8.24121E-05 | 0.051850408 |
| 629.19999 | 3805.772837 | 8.5891E-05  | 0.054042611 |
| 629.23999 | 3560.638269 | 8.03586E-05 | 0.050564874 |
| 629.27999 | 3113.191381 | 7.02604E-05 | 0.04421346  |
| 629.31999 | 2510.007481 | 5.66474E-05 | 0.035649324 |
| 629.35999 | 1843.451449 | 4.16041E-05 | 0.026183976 |
| 629.39999 | 1247.914451 | 2.81637E-05 | 0.017726227 |
| 629.43999 | 823.168449  | 1.85778E-05 | 0.011693588 |
| 629.47999 | 559.002969  | 1.26159E-05 | 0.007941468 |
| 629.51999 | 411.204042  | 9.2803E-06  | 0.005842136 |
| 629.55999 | 388.256944  | 8.76242E-06 | 0.005516468 |
| 629.59999 | 436.658981  | 9.85478E-06 | 0.006204573 |
| 629.63999 | 498.654057  | 1.12539E-05 | 0.007085923 |
| 629.67999 | 541.834285  | 1.22284E-05 | 0.007700007 |
| 629.71999 | 536.776696  | 1.21143E-05 | 0.007628618 |
| 629.75999 | 494.086629  | 1.11508E-05 | 0.007022357 |
| 629.79999 | 469.063784  | 1.05861E-05 | 0.006667136 |
| 629.83999 | 445.609289  | 1.00568E-05 | 0.006334163 |
| 629.87999 | 438.752721  | 9.90204E-06 | 0.006237095 |
| 629.91999 | 480.487131  | 1.08439E-05 | 0.006830805 |
| 629.95999 | 590.573108  | 1.33284E-05 | 0.008396367 |
| 629.99999 | 796.154764  | 1.79681E-05 | 0.011319905 |
| 630.03999 | 1081.472704 | 2.44073E-05 | 0.015377596 |
| 630.07999 | 1470.187886 | 3.31801E-05 | 0.020906113 |
| 630.11999 | 1971.241928 | 4.44882E-05 | 0.028032894 |
| 630.15999 | 2362.45133  | 5.33172E-05 | 0.033598389 |
| 630.19999 | 2548.998899 | 5.75274E-05 | 0.036253738 |
| 630.23999 | 2488.661664 | 5.61656E-05 | 0.035397824 |

|           |             |             |             |
|-----------|-------------|-------------|-------------|
| 630.27999 | 2213.496015 | 4.99555E-05 | 0.031485966 |
| 630.31999 | 1771.391805 | 3.99778E-05 | 0.025198835 |
| 630.35999 | 1258.85162  | 2.84105E-05 | 0.01790886  |
| 630.39999 | 871.994824  | 1.96797E-05 | 0.012406088 |
| 630.43999 | 623.821256  | 1.40788E-05 | 0.008875824 |
| 630.47999 | 457.471192  | 1.03245E-05 | 0.006509383 |
| 630.51999 | 392.381787  | 8.85551E-06 | 0.005583576 |
| 630.55999 | 378.604644  | 8.54458E-06 | 0.00538787  |
| 630.59999 | 389.030533  | 8.77988E-06 | 0.005536591 |
| 630.63999 | 434.944892  | 9.8161E-06  | 0.006190425 |
| 630.67999 | 477.69437   | 1.07809E-05 | 0.006799296 |
| 630.71999 | 465.98363   | 1.05166E-05 | 0.006633031 |
| 630.75999 | 426.590919  | 9.62756E-06 | 0.006072681 |
| 630.79999 | 386.230286  | 8.71668E-06 | 0.005498481 |
| 630.83999 | 382.285975  | 8.62766E-06 | 0.005442674 |
| 630.87999 | 425.645447  | 9.60622E-06 | 0.006060375 |
| 630.91999 | 499.98327   | 1.12839E-05 | 0.007119254 |
| 630.95999 | 652.850779  | 1.47339E-05 | 0.009296522 |
| 630.99999 | 969.991851  | 2.18914E-05 | 0.013813451 |
| 631.03999 | 1441.606314 | 3.2535E-05  | 0.020530915 |
| 631.07999 | 2024.461862 | 4.56893E-05 | 0.028833593 |
| 631.11999 | 2637.074266 | 5.95151E-05 | 0.037561165 |
| 631.15999 | 3091.774236 | 6.9777E-05  | 0.044040475 |
| 631.19999 | 3236.286365 | 7.30385E-05 | 0.046101885 |
| 631.23999 | 3070.020622 | 6.92861E-05 | 0.04373615  |
| 631.27999 | 2643.57094  | 5.96617E-05 | 0.037663246 |
| 631.31999 | 2049.5471   | 4.62554E-05 | 0.029201973 |
| 631.35999 | 1478.964377 | 3.33782E-05 | 0.021073639 |
| 631.39999 | 1023.55892  | 2.31003E-05 | 0.014585529 |
| 631.43999 | 680.603527  | 1.53603E-05 | 0.009699091 |
| 631.47999 | 464.519171  | 1.04836E-05 | 0.006620152 |
| 631.51999 | 366.856741  | 8.27945E-06 | 0.005228635 |
| 631.55999 | 335.73629   | 7.5771E-06  | 0.004785393 |
| 631.59999 | 359.99708   | 8.12463E-06 | 0.005131518 |
| 631.63999 | 417.252975  | 9.41682E-06 | 0.005948039 |
| 631.67999 | 449.622534  | 1.01474E-05 | 0.006409881 |
| 631.71999 | 419.583939  | 9.46943E-06 | 0.005982025 |
| 631.75999 | 355.08223   | 8.01371E-06 | 0.005062742 |
| 631.79999 | 285.545368  | 6.44436E-06 | 0.004071547 |
| 631.83999 | 257.313934  | 5.80722E-06 | 0.003669232 |
| 631.87999 | 261.599691  | 5.90394E-06 | 0.003730582 |
| 631.91999 | 301.865551  | 6.81269E-06 | 0.004305072 |
| 631.95999 | 392.827986  | 8.86558E-06 | 0.005602692 |
| 631.99999 | 574.90598   | 1.29748E-05 | 0.008200091 |
| 632.03999 | 915.353431  | 2.06583E-05 | 0.013056841 |
| 632.07999 | 1382.271124 | 3.11959E-05 | 0.019718326 |

|           |             |             |             |
|-----------|-------------|-------------|-------------|
| 632.11999 | 1859.68987  | 4.19706E-05 | 0.026530462 |
| 632.15999 | 2189.798861 | 4.94207E-05 | 0.031241796 |
| 632.19999 | 2321.523746 | 5.23936E-05 | 0.033123206 |
| 632.23999 | 2293.626183 | 5.17639E-05 | 0.032727238 |
| 632.27999 | 2120.347167 | 4.78533E-05 | 0.030256673 |
| 632.31999 | 1740.097546 | 3.92716E-05 | 0.024832204 |
| 632.35999 | 1297.884291 | 2.92914E-05 | 0.018522735 |
| 632.39999 | 905.261342  | 2.04305E-05 | 0.01292024  |
| 632.43999 | 598.956432  | 1.35176E-05 | 0.008549079 |
| 632.47999 | 404.493029  | 9.12884E-06 | 0.005773811 |
| 632.51999 | 325.029706  | 7.33547E-06 | 0.00463983  |
| 632.55999 | 320.422013  | 7.23148E-06 | 0.004574344 |
| 632.59999 | 373.246313  | 8.42365E-06 | 0.005328801 |
| 632.63999 | 437.408715  | 9.87171E-06 | 0.006245236 |
| 632.67999 | 452.677847  | 1.02163E-05 | 0.006463654 |
| 632.71999 | 445.059162  | 1.00444E-05 | 0.006355271 |
| 632.75999 | 418.468279  | 9.44425E-06 | 0.005975941 |
| 632.79999 | 379.304362  | 8.56037E-06 | 0.005417003 |
| 632.83999 | 332.481354  | 7.50364E-06 | 0.004748604 |
| 632.87999 | 366.069366  | 8.26168E-06 | 0.005228649 |
| 632.91999 | 483.034263  | 1.09014E-05 | 0.006899721 |
| 632.95999 | 713.650504  | 1.61061E-05 | 0.010194516 |
| 632.99999 | 1140.217324 | 2.57331E-05 | 0.016289063 |
| 633.03999 | 1771.948671 | 3.99904E-05 | 0.025315531 |
| 633.07999 | 2588.137367 | 5.84107E-05 | 0.036978617 |
| 633.11999 | 3336.178311 | 7.52929E-05 | 0.047669439 |
| 633.15999 | 3788.098144 | 8.54921E-05 | 0.054130176 |
| 633.19999 | 3808.601839 | 8.59548E-05 | 0.054426603 |
| 633.23999 | 3474.530772 | 7.84153E-05 | 0.049655716 |
| 633.27999 | 2881.738303 | 6.50368E-05 | 0.041186516 |
| 633.31999 | 2224.779272 | 5.02102E-05 | 0.031799104 |
| 633.35999 | 1624.523678 | 3.66632E-05 | 0.023221027 |
| 633.39999 | 1125.182847 | 2.53938E-05 | 0.016084439 |
| 633.43999 | 724.504888  | 1.63511E-05 | 0.010357419 |
| 633.47999 | 478.371239  | 1.07962E-05 | 0.006839159 |
| 633.51999 | 406.093183  | 9.16496E-06 | 0.005806184 |
| 633.55999 | 423.228408  | 9.55168E-06 | 0.00605156  |
| 633.59999 | 464.998564  | 1.04944E-05 | 0.006649233 |
| 633.63999 | 467.673568  | 1.05547E-05 | 0.006687906 |
| 633.67999 | 444.743759  | 1.00372E-05 | 0.006360403 |
| 633.71999 | 432.524739  | 9.76148E-06 | 0.006186046 |
| 633.75999 | 389.246075  | 8.78474E-06 | 0.005567418 |
| 633.79999 | 337.007545  | 7.60579E-06 | 0.00482055  |
| 633.83999 | 295.33799   | 6.66537E-06 | 0.004224776 |
| 633.87999 | 277.160709  | 6.25513E-06 | 0.003965002 |
| 633.91999 | 304.666395  | 6.8759E-06  | 0.004358768 |



|           |             |             |             |
|-----------|-------------|-------------|-------------|
| 633.95999 | 380.387326  | 8.58481E-06 | 0.005442427 |
| 633.99999 | 567.747379  | 1.28133E-05 | 0.008123611 |
| 634.03999 | 962.232203  | 2.17162E-05 | 0.013768965 |
| 634.07999 | 1481.98551  | 3.34463E-05 | 0.02120766  |
| 634.11999 | 1978.606037 | 4.46544E-05 | 0.028316236 |
| 634.15999 | 2372.088736 | 5.35347E-05 | 0.033949589 |
| 634.19999 | 2600.661024 | 5.86933E-05 | 0.037223288 |
| 634.23999 | 2547.388168 | 5.7491E-05  | 0.036463093 |
| 634.27999 | 2226.658867 | 5.02526E-05 | 0.031874212 |
| 634.31999 | 1821.497781 | 4.11087E-05 | 0.02607605  |
| 634.35999 | 1332.236697 | 3.00667E-05 | 0.019073128 |
| 634.39999 | 876.756842  | 1.97872E-05 | 0.012552987 |
| 634.43999 | 566.987607  | 1.27961E-05 | 0.008118371 |
| 634.47999 | 391.727407  | 8.84074E-06 | 0.005609274 |
| 634.51999 | 322.015196  | 7.26743E-06 | 0.004611332 |
| 634.55999 | 341.667434  | 7.71096E-06 | 0.004893065 |
| 634.59999 | 393.334406  | 8.87701E-06 | 0.00563335  |
| 634.63999 | 466.638018  | 1.05314E-05 | 0.006683629 |
| 634.67999 | 476.583622  | 1.07558E-05 | 0.006826509 |
| 634.71999 | 410.513807  | 9.26472E-06 | 0.005880506 |
| 634.75999 | 377.489401  | 8.51941E-06 | 0.005407781 |
| 634.79999 | 376.175975  | 8.48977E-06 | 0.005389305 |
| 634.83999 | 351.614021  | 7.93544E-06 | 0.005037734 |
| 634.87999 | 342.559424  | 7.73109E-06 | 0.004908314 |
| 634.91999 | 407.917274  | 9.20612E-06 | 0.005845153 |
| 634.95999 | 572.966165  | 1.2931E-05  | 0.008210698 |
| 634.99999 | 918.376221  | 2.07265E-05 | 0.01316131  |
| 635.03999 | 1543.689049 | 3.48389E-05 | 0.022124102 |
| 635.07999 | 2315.950246 | 5.22678E-05 | 0.033194216 |
| 635.11999 | 3036.052757 | 6.85195E-05 | 0.043518093 |
| 635.15999 | 3734.785469 | 8.42889E-05 | 0.053536941 |
| 635.19999 | 4131.335695 | 9.32385E-05 | 0.059225089 |
| 635.23999 | 4037.479466 | 9.11203E-05 | 0.057883251 |
| 635.27999 | 3611.389228 | 8.1504E-05  | 0.051777876 |
| 635.31999 | 2949.177704 | 6.65588E-05 | 0.042286157 |
| 635.35999 | 2210.489869 | 4.98877E-05 | 0.031696634 |
| 635.39999 | 1521.578275 | 3.43399E-05 | 0.021819574 |
| 635.43999 | 963.129607  | 2.17365E-05 | 0.013812237 |
| 635.47999 | 615.477588  | 1.38905E-05 | 0.008827117 |
| 635.51999 | 439.951897  | 9.9291E-06  | 0.006310142 |
| 635.55999 | 379.800135  | 8.57156E-06 | 0.005447741 |
| 635.59999 | 396.860028  | 8.95658E-06 | 0.005692801 |
| 635.63999 | 451.863235  | 1.01979E-05 | 0.006482208 |
| 635.67999 | 481.937458  | 1.08767E-05 | 0.006914073 |
| 635.71999 | 460.783068  | 1.03992E-05 | 0.006611    |
| 635.75999 | 410.146766  | 9.25644E-06 | 0.005884875 |

|           |             |             |             |
|-----------|-------------|-------------|-------------|
| 635.79999 | 377.504822  | 8.51976E-06 | 0.005416862 |
| 635.83999 | 331.395301  | 7.47913E-06 | 0.00475553  |
| 635.87999 | 296.369408  | 6.68864E-06 | 0.004253175 |
| 635.91999 | 305.950483  | 6.90488E-06 | 0.004390949 |
| 635.95999 | 384.544771  | 8.67864E-06 | 0.005519268 |
| 635.99999 | 561.459757  | 1.26714E-05 | 0.008058988 |
| 636.03999 | 854.931025  | 1.92946E-05 | 0.012272139 |
| 636.07999 | 1278.056703 | 2.8844E-05  | 0.018347066 |
| 636.11999 | 1767.482624 | 3.98896E-05 | 0.025374585 |
| 636.15999 | 2168.693231 | 4.89444E-05 | 0.03113646  |
| 636.19999 | 2405.019624 | 5.42779E-05 | 0.034531627 |
| 636.23999 | 2462.219079 | 5.55689E-05 | 0.035355128 |
| 636.27999 | 2301.338682 | 5.1938E-05  | 0.033047116 |
| 636.31999 | 1967.063069 | 4.43939E-05 | 0.028248709 |
| 636.35999 | 1543.254529 | 3.48291E-05 | 0.022163849 |
| 636.39999 | 1134.760285 | 2.561E-05   | 0.016298178 |
| 636.43999 | 806.79304   | 1.82082E-05 | 0.011588424 |
| 636.47999 | 560.344503  | 1.26462E-05 | 0.00804905  |
| 636.51999 | 408.300412  | 9.21477E-06 | 0.005865386 |
| 636.55999 | 385.528224  | 8.70084E-06 | 0.005538603 |
| 636.59999 | 460.269001  | 1.03876E-05 | 0.006612765 |
| 636.63999 | 537.395439  | 1.21283E-05 | 0.007721339 |
| 636.67999 | 531.670689  | 1.19991E-05 | 0.007639566 |
| 636.71999 | 468.673171  | 1.05773E-05 | 0.006734779 |
| 636.75999 | 412.910333  | 9.31881E-06 | 0.005933846 |
| 636.79999 | 391.380805  | 8.83292E-06 | 0.005624803 |
| 636.83999 | 373.894825  | 8.43829E-06 | 0.005373838 |
| 636.87999 | 391.819028  | 8.84281E-06 | 0.005631809 |
| 636.91999 | 450.07903   | 1.01577E-05 | 0.006469615 |
| 636.95999 | 594.652759  | 1.34205E-05 | 0.008548312 |
| 636.99999 | 922.086064  | 2.08102E-05 | 0.013256096 |
| 637.03999 | 1442.383029 | 3.25526E-05 | 0.020737293 |
| 637.07999 | 2098.58373  | 4.73621E-05 | 0.030173454 |
| 637.11999 | 2754.044722 | 6.2155E-05  | 0.039600163 |
| 637.15999 | 3273.890721 | 7.38872E-05 | 0.047077938 |
| 637.19999 | 3478.370104 | 7.8502E-05  | 0.050021453 |
| 637.23999 | 3346.404127 | 7.55237E-05 | 0.048126709 |
| 637.27999 | 2911.016356 | 6.56976E-05 | 0.041867756 |
| 637.31999 | 2278.703473 | 5.14272E-05 | 0.032775559 |
| 637.35999 | 1651.979792 | 3.72829E-05 | 0.023762618 |
| 637.39999 | 1120.686917 | 2.52923E-05 | 0.016121339 |
| 637.43999 | 768.083468  | 1.73346E-05 | 0.011049751 |
| 637.47999 | 535.175791  | 1.20782E-05 | 0.007699593 |
| 637.51999 | 387.104224  | 8.7364E-06  | 0.005569632 |
| 637.55999 | 337.756428  | 7.62269E-06 | 0.004859924 |
| 637.59999 | 389.087745  | 8.78117E-06 | 0.005598873 |

|           |             |             |             |
|-----------|-------------|-------------|-------------|
| 637.63999 | 444.075751  | 1.00222E-05 | 0.006390537 |
| 637.67999 | 462.538869  | 1.04389E-05 | 0.006656651 |
| 637.71999 | 423.491284  | 9.55761E-06 | 0.006095078 |
| 637.75999 | 369.780096  | 8.34542E-06 | 0.005322376 |
| 637.79999 | 313.00382   | 7.06406E-06 | 0.004505458 |
| 637.83999 | 290.42096   | 6.5544E-06  | 0.004180656 |
| 637.87999 | 300.985196  | 6.79282E-06 | 0.004333002 |
| 637.91999 | 315.345632  | 7.11691E-06 | 0.00454002  |
| 637.95999 | 373.256506  | 8.42388E-06 | 0.005374098 |
| 637.99999 | 525.627985  | 1.18627E-05 | 0.007568397 |
| 638.03999 | 792.192734  | 1.78787E-05 | 0.011407317 |
| 638.07999 | 1160.502754 | 2.61909E-05 | 0.016711909 |
| 638.11999 | 1556.936469 | 3.51379E-05 | 0.022422188 |
| 638.15999 | 1889.148131 | 4.26354E-05 | 0.027208233 |
| 638.19999 | 2014.03816  | 4.5454E-05  | 0.029008765 |
| 638.23999 | 1956.542887 | 4.41564E-05 | 0.028182411 |
| 638.27999 | 1749.87818  | 3.94923E-05 | 0.025207153 |
| 638.31999 | 1413.195176 | 3.18938E-05 | 0.02035848  |
| 638.35999 | 1067.912832 | 2.41013E-05 | 0.015385309 |
| 638.39999 | 819.703858  | 1.84996E-05 | 0.011810128 |
| 638.43999 | 606.897249  | 1.36968E-05 | 0.008744601 |
| 638.47999 | 436.253642  | 9.84564E-06 | 0.006286242 |
| 638.51999 | 361.11289   | 8.14981E-06 | 0.00520382  |
| 638.55999 | 386.822866  | 8.73005E-06 | 0.005574663 |
| 638.59999 | 478.446725  | 1.07979E-05 | 0.006895524 |
| 638.63999 | 538.848221  | 1.21611E-05 | 0.007766535 |
| 638.67999 | 581.65327   | 1.31271E-05 | 0.008384019 |
| 638.71999 | 596.638093  | 1.34653E-05 | 0.00860055  |
| 638.75999 | 536.090856  | 1.20988E-05 | 0.007728245 |
| 638.79999 | 470.205578  | 1.06119E-05 | 0.006778872 |
| 638.83999 | 482.196615  | 1.08825E-05 | 0.00695218  |
| 638.87999 | 703.345051  | 1.58735E-05 | 0.010141273 |
| 638.91999 | 1397.791243 | 3.15462E-05 | 0.020155499 |
| 638.95999 | 3123.346268 | 7.04896E-05 | 0.045040018 |
| 638.99999 | 6402.56102  | 0.000144497 | 0.092333508 |
| 639.03999 | 11108.94963 | 0.000250714 | 0.160215965 |
| 639.07999 | 15923.54263 | 0.000359372 | 0.229667568 |
| 639.11999 | 18989.54657 | 0.000428568 | 0.27390613  |
| 639.15999 | 18794.166   | 0.000424158 | 0.271104918 |
| 639.19999 | 15693.9447  | 0.00035419  | 0.226398546 |
| 639.23999 | 11409.72041 | 0.000257501 | 0.164605254 |
| 639.27999 | 7298.404147 | 0.000164715 | 0.105298886 |
| 639.31999 | 4253.288435 | 9.59908E-05 | 0.061368835 |
| 639.35999 | 2321.971738 | 5.24037E-05 | 0.033504809 |
| 639.39999 | 1257.18299  | 2.83729E-05 | 0.018141612 |
| 639.43999 | 734.168987  | 1.65692E-05 | 0.010594991 |

|           |             |             |             |
|-----------|-------------|-------------|-------------|
| 639.47999 | 519.517363  | 1.17248E-05 | 0.007497764 |
| 639.51999 | 404.837131  | 9.13661E-06 | 0.005843045 |
| 639.55999 | 330.502461  | 7.45898E-06 | 0.004770465 |
| 639.59999 | 351.240933  | 7.92702E-06 | 0.005070121 |
| 639.63999 | 405.733284  | 9.15684E-06 | 0.005857078 |
| 639.67999 | 467.876857  | 1.05593E-05 | 0.006754591 |
| 639.71999 | 467.967146  | 1.05614E-05 | 0.006756317 |
| 639.75999 | 451.050234  | 1.01796E-05 | 0.006512485 |
| 639.79999 | 411.446795  | 9.28578E-06 | 0.005941043 |
| 639.83999 | 356.639517  | 8.04886E-06 | 0.005149981 |
| 639.87999 | 353.183111  | 7.97085E-06 | 0.005100388 |
| 639.91999 | 488.126794  | 1.10163E-05 | 0.007049577 |
| 639.95999 | 960.573192  | 2.16788E-05 | 0.013873564 |
| 639.99999 | 1978.920082 | 4.46615E-05 | 0.02858334  |
| 640.03999 | 3566.436353 | 8.04895E-05 | 0.051516499 |
| 640.07999 | 5326.711206 | 0.000120216 | 0.076948146 |
| 640.11999 | 6553.241184 | 0.000147898 | 0.094672163 |
| 640.15999 | 6758.802258 | 0.000152537 | 0.097647926 |
| 640.19999 | 6006.27756  | 0.000135553 | 0.086781233 |
| 640.23999 | 4715.091845 | 0.000106413 | 0.068129894 |
| 640.27999 | 3356.478993 | 7.57511E-05 | 0.048501885 |
| 640.31999 | 2193.670119 | 4.95081E-05 | 0.031701013 |
| 640.35999 | 1381.927659 | 3.11882E-05 | 0.019971664 |
| 640.39999 | 877.55332   | 1.98052E-05 | 0.012683222 |
| 640.43999 | 593.682666  | 1.33986E-05 | 0.008580993 |
| 640.47999 | 438.052717  | 9.88624E-06 | 0.006331939 |
| 640.51999 | 377.914287  | 8.529E-06   | 0.005462994 |
| 640.55999 | 388.269307  | 8.7627E-06  | 0.005613033 |
| 640.59999 | 409.894684  | 9.25075E-06 | 0.005926032 |
| 640.63999 | 433.421559  | 9.78172E-06 | 0.006266562 |
| 640.67999 | 450.58313   | 1.0169E-05  | 0.006515096 |
| 640.71999 | 461.088586  | 1.04061E-05 | 0.006667414 |
| 640.75999 | 468.698289  | 1.05779E-05 | 0.006777874 |
| 640.79999 | 439.212859  | 9.91242E-06 | 0.00635188  |
| 640.83999 | 412.343173  | 9.30601E-06 | 0.005963664 |
| 640.87999 | 428.900549  | 9.67969E-06 | 0.006203518 |
| 640.91999 | 544.802166  | 1.22954E-05 | 0.007880384 |
| 640.95999 | 814.63128   | 1.83851E-05 | 0.011784109 |
| 640.99999 | 1390.7875   | 3.13881E-05 | 0.020119795 |
| 641.03999 | 2308.316702 | 5.20955E-05 | 0.033395294 |
| 641.07999 | 3458.585985 | 7.80555E-05 | 0.050039799 |
| 641.11999 | 4560.188381 | 0.000102917 | 0.06598221  |
| 641.15999 | 5077.45694  | 0.000114591 | 0.073471248 |
| 641.19999 | 4782.687206 | 0.000107939 | 0.069210222 |
| 641.23999 | 4064.46415  | 9.17293E-05 | 0.058820492 |
| 641.27999 | 3154.641396 | 7.11959E-05 | 0.045656482 |

|           |             |             |             |
|-----------|-------------|-------------|-------------|
| 641.31999 | 2222.350922 | 5.01554E-05 | 0.032165638 |
| 641.35999 | 1475.584938 | 3.33019E-05 | 0.021358504 |
| 641.39999 | 955.755589  | 2.15701E-05 | 0.013835044 |
| 641.43999 | 611.677162  | 1.38047E-05 | 0.008854888 |
| 641.47999 | 409.539086  | 9.24273E-06 | 0.005929024 |
| 641.51999 | 342.034368  | 7.71924E-06 | 0.004952046 |
| 641.55999 | 330.421399  | 7.45715E-06 | 0.00478421  |
| 641.59999 | 359.867677  | 8.12171E-06 | 0.00521089  |
| 641.63999 | 407.505476  | 9.19683E-06 | 0.005901055 |
| 641.67999 | 451.22572   | 1.01835E-05 | 0.006534571 |
| 641.71999 | 452.616907  | 1.02149E-05 | 0.006555127 |
| 641.75999 | 430.895081  | 9.7247E-06  | 0.006240925 |
| 641.79999 | 373.259621  | 8.42395E-06 | 0.005406491 |
| 641.83999 | 306.282724  | 6.91237E-06 | 0.004436638 |
| 641.87999 | 290.615946  | 6.5588E-06  | 0.004209961 |
| 641.91999 | 348.451003  | 7.86405E-06 | 0.005048093 |
| 641.95999 | 515.598515  | 1.16363E-05 | 0.007470065 |
| 641.99999 | 798.348437  | 1.80176E-05 | 0.011567307 |
| 642.03999 | 1212.273728 | 2.73593E-05 | 0.017565784 |
| 642.07999 | 1804.18198  | 4.07179E-05 | 0.026144132 |
| 642.11999 | 2402.405402 | 5.42189E-05 | 0.034815068 |
| 642.15999 | 2807.814229 | 6.33685E-05 | 0.040692687 |
| 642.19999 | 2933.556816 | 6.62063E-05 | 0.04251768  |
| 642.23999 | 2747.244492 | 6.20015E-05 | 0.039819831 |
| 642.27999 | 2322.579922 | 5.24174E-05 | 0.033666643 |
| 642.31999 | 1768.543788 | 3.99136E-05 | 0.025637284 |
| 642.35999 | 1257.810192 | 2.8387E-05  | 0.018234688 |
| 642.39999 | 856.93834   | 1.93399E-05 | 0.012423955 |
| 642.43999 | 591.708066  | 1.3354E-05  | 0.008579161 |
| 642.47999 | 448.238029  | 1.01161E-05 | 0.006499397 |
| 642.51999 | 400.107674  | 9.02987E-06 | 0.005801874 |
| 642.55999 | 416.385719  | 9.39725E-06 | 0.006038294 |
| 642.59999 | 475.087838  | 1.07221E-05 | 0.006890003 |
| 642.63999 | 509.291652  | 1.1494E-05  | 0.007386506 |
| 642.67999 | 518.446185  | 1.17006E-05 | 0.007519747 |
| 642.71999 | 505.708351  | 1.14131E-05 | 0.007335449 |
| 642.75999 | 484.958594  | 1.09448E-05 | 0.007034905 |
| 642.79999 | 464.030919  | 1.04725E-05 | 0.006731743 |
| 642.83999 | 412.313204  | 9.30533E-06 | 0.005981841 |
| 642.87999 | 399.944464  | 9.02619E-06 | 0.005802757 |
| 642.91999 | 491.808618  | 1.10994E-05 | 0.007136049 |
| 642.95999 | 682.402885  | 1.54009E-05 | 0.009902151 |
| 642.99999 | 1022.190043 | 2.30694E-05 | 0.014833627 |
| 643.03999 | 1609.632145 | 3.63272E-05 | 0.023359814 |
| 643.07999 | 2332.80518  | 5.26482E-05 | 0.033856981 |
| 643.11999 | 3100.036009 | 6.99635E-05 | 0.044994922 |

|           |             |             |             |
|-----------|-------------|-------------|-------------|
| 643.15999 | 3694.54438  | 8.33807E-05 | 0.053627143 |
| 643.19999 | 3938.617651 | 8.88891E-05 | 0.057173477 |
| 643.23999 | 3754.706793 | 8.47385E-05 | 0.054507193 |
| 643.27999 | 3229.419304 | 7.28835E-05 | 0.046884494 |
| 643.31999 | 2522.090678 | 5.69201E-05 | 0.036617821 |
| 643.35999 | 1767.353356 | 3.98867E-05 | 0.025661509 |
| 643.39999 | 1148.760376 | 2.59259E-05 | 0.016680738 |
| 643.43999 | 731.660883  | 1.65126E-05 | 0.010624846 |
| 643.47999 | 487.227977  | 1.09961E-05 | 0.007075743 |
| 643.51999 | 371.550587  | 8.38538E-06 | 0.005396159 |
| 643.55999 | 344.837881  | 7.78251E-06 | 0.005008512 |
| 643.59999 | 356.766848  | 8.05173E-06 | 0.005182094 |
| 643.63999 | 404.074075  | 9.11939E-06 | 0.005869603 |
| 643.67999 | 449.397248  | 1.01423E-05 | 0.006528376 |
| 643.71999 | 423.376406  | 9.55502E-06 | 0.006150755 |
| 643.75999 | 374.384601  | 8.44934E-06 | 0.005439346 |
| 643.79999 | 327.264603  | 7.38591E-06 | 0.004755046 |
| 643.83999 | 290.953351  | 6.56641E-06 | 0.004227719 |
| 643.87999 | 263.122869  | 5.93832E-06 | 0.003823563 |
| 643.91999 | 290.96268   | 6.56662E-06 | 0.004228379 |
| 643.95999 | 400.566317  | 9.04022E-06 | 0.005821542 |
| 643.99999 | 592.523051  | 1.33724E-05 | 0.008611838 |
| 644.03999 | 880.420476  | 1.98699E-05 | 0.012796987 |
| 644.07999 | 1292.638715 | 2.91731E-05 | 0.018789781 |
| 644.11999 | 1827.230488 | 4.1238E-05  | 0.02656225  |
| 644.15999 | 2224.275723 | 5.01988E-05 | 0.032336062 |
| 644.19999 | 2338.577605 | 5.27784E-05 | 0.03399987  |
| 644.23999 | 2296.090029 | 5.18196E-05 | 0.033384229 |
| 644.27999 | 2076.97279  | 4.68744E-05 | 0.030200227 |
| 644.31999 | 1683.289513 | 3.79895E-05 | 0.024477394 |
| 644.35999 | 1252.271428 | 2.8262E-05  | 0.018210916 |
| 644.39999 | 847.432512  | 1.91254E-05 | 0.012324389 |
| 644.43999 | 567.229986  | 1.28016E-05 | 0.008249857 |
| 644.47999 | 421.614418  | 9.51525E-06 | 0.006132388 |
| 644.51999 | 354.80248   | 8.0074E-06  | 0.005160928 |
| 644.55999 | 362.556176  | 8.18239E-06 | 0.00527404  |
| 644.59999 | 414.409168  | 9.35264E-06 | 0.00602871  |
| 644.63999 | 492.523759  | 1.11156E-05 | 0.007165544 |
| 644.67999 | 550.042894  | 1.24137E-05 | 0.008002865 |
| 644.71999 | 533.476183  | 1.20398E-05 | 0.007762309 |
| 644.75999 | 472.317274  | 1.06595E-05 | 0.006872847 |
| 644.79999 | 417.985599  | 9.43335E-06 | 0.006082626 |
| 644.83999 | 362.287719  | 8.17633E-06 | 0.005272424 |
| 644.87999 | 338.308309  | 7.63515E-06 | 0.004923754 |
| 644.91999 | 402.243227  | 9.07807E-06 | 0.005854628 |
| 644.95999 | 533.237946  | 1.20344E-05 | 0.007761731 |

|           |             |             |             |
|-----------|-------------|-------------|-------------|
| 644.99999 | 775.426278  | 1.75003E-05 | 0.011287688 |
| 645.03999 | 1214.814357 | 2.74167E-05 | 0.017684847 |
| 645.07999 | 1829.500726 | 4.12893E-05 | 0.02663489  |
| 645.11999 | 2496.219941 | 5.63362E-05 | 0.036343613 |
| 645.15999 | 2941.113937 | 6.63768E-05 | 0.042823685 |
| 645.19999 | 3028.675434 | 6.8353E-05  | 0.044101346 |
| 645.23999 | 2879.005312 | 6.49751E-05 | 0.041924559 |
| 645.27999 | 2526.924466 | 5.70292E-05 | 0.036799779 |
| 645.31999 | 2053.418874 | 4.63428E-05 | 0.029905938 |
| 645.35999 | 1539.56368  | 3.47458E-05 | 0.022423554 |
| 645.39999 | 1016.366876 | 2.2938E-05  | 0.014804175 |
| 645.43999 | 644.172669  | 1.45381E-05 | 0.009383458 |
| 645.47999 | 439.298684  | 9.91436E-06 | 0.006399521 |
| 645.51999 | 354.276324  | 7.99552E-06 | 0.00516127  |
| 645.55999 | 349.967115  | 7.89827E-06 | 0.005098807 |
| 645.59999 | 373.139396  | 8.42124E-06 | 0.00543675  |
| 645.63999 | 414.6507    | 9.35809E-06 | 0.006041956 |
| 645.67999 | 471.483001  | 1.06407E-05 | 0.006870497 |
| 645.71999 | 440.720545  | 9.94645E-06 | 0.006422621 |
| 645.75999 | 388.75595   | 8.77368E-06 | 0.005665692 |
| 645.79999 | 347.191833  | 7.83564E-06 | 0.005060254 |
| 645.83999 | 306.450166  | 6.91615E-06 | 0.004466728 |
| 645.87999 | 285.494366  | 6.44321E-06 | 0.004161541 |
| 645.91999 | 306.794045  | 6.92391E-06 | 0.004472295 |
| 645.95999 | 383.270609  | 8.64988E-06 | 0.005587479 |
| 645.99999 | 565.963003  | 1.2773E-05  | 0.008251356 |
| 646.03999 | 884.107583  | 1.99531E-05 | 0.012890485 |
| 646.07999 | 1227.99621  | 2.77142E-05 | 0.017905567 |
| 646.11999 | 1553.315218 | 3.50562E-05 | 0.022650486 |
| 646.15999 | 1872.742728 | 4.22652E-05 | 0.027310078 |
| 646.19999 | 2074.844328 | 4.68263E-05 | 0.030259185 |
| 646.23999 | 2022.238257 | 4.56391E-05 | 0.029493812 |
| 646.27999 | 1788.799399 | 4.03707E-05 | 0.026090783 |
| 646.31999 | 1484.634016 | 3.35061E-05 | 0.021655676 |
| 646.35999 | 1126.610272 | 2.5426E-05  | 0.016434365 |
| 646.39999 | 761.0127    | 1.7175E-05  | 0.011101918 |
| 646.43999 | 502.527991  | 1.13414E-05 | 0.007331507 |
| 646.47999 | 357.359745  | 8.06511E-06 | 0.005213933 |
| 646.51999 | 290.158841  | 6.54848E-06 | 0.004233724 |
| 646.55999 | 299.545379  | 6.76032E-06 | 0.004370954 |
| 646.59999 | 368.389615  | 8.31404E-06 | 0.005375858 |
| 646.63999 | 425.621543  | 9.60569E-06 | 0.00621142  |
| 646.67999 | 489.087184  | 1.1038E-05  | 0.007138064 |
| 646.71999 | 478.395474  | 1.07967E-05 | 0.006982454 |
| 646.75999 | 417.456769  | 9.42142E-06 | 0.006093396 |
| 646.79999 | 408.120815  | 9.21072E-06 | 0.005957493 |

|           |             |             |             |
|-----------|-------------|-------------|-------------|
| 646.83999 | 382.702394  | 8.63706E-06 | 0.005586796 |
| 646.87999 | 355.547729  | 8.02422E-06 | 0.005190705 |
| 646.91999 | 389.602332  | 8.79278E-06 | 0.005688226 |
| 646.95999 | 538.34767   | 1.21498E-05 | 0.007860407 |
| 646.99999 | 818.140266  | 1.84643E-05 | 0.011946393 |
| 647.03999 | 1311.875483 | 2.96072E-05 | 0.019157044 |
| 647.07999 | 2046.437209 | 4.61852E-05 | 0.029885543 |
| 647.11999 | 2816.047461 | 6.35543E-05 | 0.041127238 |
| 647.15999 | 3489.363106 | 7.87501E-05 | 0.050963891 |
| 647.19999 | 3860.604788 | 8.71285E-05 | 0.056389547 |
| 647.23999 | 3800.027079 | 8.57613E-05 | 0.055508155 |
| 647.27999 | 3323.824585 | 7.50141E-05 | 0.04855512  |
| 647.31999 | 2602.888958 | 5.87436E-05 | 0.038025892 |
| 647.35999 | 1854.508793 | 4.18537E-05 | 0.027094398 |
| 647.39999 | 1256.402863 | 2.83553E-05 | 0.018357197 |
| 647.43999 | 814.617813  | 1.83848E-05 | 0.011903048 |
| 647.47999 | 521.406223  | 1.17674E-05 | 0.007619164 |
| 647.51999 | 393.64403   | 8.884E-06   | 0.005752566 |
| 647.55999 | 368.389751  | 8.31404E-06 | 0.005383842 |
| 647.59999 | 389.991723  | 8.80157E-06 | 0.005699897 |
| 647.63999 | 460.189603  | 1.03858E-05 | 0.006726284 |
| 647.67999 | 487.084889  | 1.09928E-05 | 0.007119834 |
| 647.71999 | 460.786696  | 1.03993E-05 | 0.006735843 |
| 647.75999 | 407.522828  | 9.19722E-06 | 0.005957593 |
| 647.79999 | 324.224772  | 7.3173E-06  | 0.004740148 |
| 647.83999 | 274.032278  | 6.18453E-06 | 0.004006584 |
| 647.87999 | 303.321394  | 6.84554E-06 | 0.004435089 |
| 647.91999 | 350.446923  | 7.9091E-06  | 0.005124463 |
| 647.95999 | 417.106879  | 9.41352E-06 | 0.006099585 |
| 647.99999 | 578.850478  | 1.30638E-05 | 0.008465374 |
| 648.03999 | 828.949891  | 1.87082E-05 | 0.012123691 |
| 648.07999 | 1197.798489 | 2.70326E-05 | 0.017519315 |
| 648.11999 | 1655.820717 | 3.73696E-05 | 0.024219964 |
| 648.15999 | 2073.167845 | 4.67885E-05 | 0.030326441 |
| 648.19999 | 2264.004074 | 5.10954E-05 | 0.03312005  |
| 648.23999 | 2202.540757 | 4.97083E-05 | 0.032222893 |
| 648.27999 | 2009.998037 | 4.53629E-05 | 0.029407832 |
| 648.31999 | 1633.937069 | 3.68757E-05 | 0.023907243 |
| 648.35999 | 1206.787736 | 2.72355E-05 | 0.01765842  |
| 648.39999 | 832.506548  | 1.87885E-05 | 0.012182472 |
| 648.43999 | 584.796896  | 1.31981E-05 | 0.008558144 |
| 648.47999 | 436.74059   | 9.85663E-06 | 0.006391825 |
| 648.51999 | 403.256134  | 9.10093E-06 | 0.005902135 |
| 648.55999 | 418.773921  | 9.45114E-06 | 0.006129634 |
| 648.59999 | 463.502085  | 1.04606E-05 | 0.006784743 |
| 648.63999 | 530.561565  | 1.1974E-05  | 0.007766838 |



|           |             |             |             |
|-----------|-------------|-------------|-------------|
| 648.67999 | 568.286342  | 1.28254E-05 | 0.008319601 |
| 648.71999 | 564.521413  | 1.27405E-05 | 0.008264992 |
| 648.75999 | 560.05709   | 1.26397E-05 | 0.008200137 |
| 648.79999 | 521.466308  | 1.17688E-05 | 0.007635577 |
| 648.83999 | 532.361286  | 1.20147E-05 | 0.007795587 |
| 648.87999 | 579.138327  | 1.30703E-05 | 0.008481086 |
| 648.91999 | 736.19488   | 1.66149E-05 | 0.010781736 |
| 648.95999 | 1120.746822 | 2.52937E-05 | 0.016414596 |
| 648.99999 | 1742.866394 | 3.93341E-05 | 0.025527809 |
| 649.03999 | 2729.020207 | 6.15902E-05 | 0.039974493 |
| 649.07999 | 3896.532725 | 8.79393E-05 | 0.05707965  |
| 649.11999 | 4935.438538 | 0.000111386 | 0.072302862 |
| 649.15999 | 5565.91822  | 0.000125615 | 0.081544246 |
| 649.19999 | 5511.897043 | 0.000124396 | 0.080757777 |
| 649.23999 | 4835.871988 | 0.000109139 | 0.070857335 |
| 649.27999 | 3830.930018 | 8.64588E-05 | 0.056135939 |
| 649.31999 | 2769.086465 | 6.24944E-05 | 0.040578879 |
| 649.35999 | 1848.356757 | 4.17148E-05 | 0.027087946 |
| 649.39999 | 1177.995581 | 2.65857E-05 | 0.017264766 |
| 649.43999 | 748.757319  | 1.68984E-05 | 0.010974503 |
| 649.47999 | 514.803843  | 1.16184E-05 | 0.007545922 |
| 649.51999 | 411.637204  | 9.29008E-06 | 0.006034092 |
| 649.55999 | 362.415322  | 8.17921E-06 | 0.005312887 |
| 649.59999 | 369.075218  | 8.32951E-06 | 0.005410852 |
| 649.63999 | 403.709142  | 9.11115E-06 | 0.005918969 |
| 649.67999 | 410.230524  | 9.25833E-06 | 0.006014953 |
| 649.71999 | 397.450787  | 8.96991E-06 | 0.00582793  |
| 649.75999 | 372.264504  | 8.40149E-06 | 0.005458953 |
| 649.79999 | 331.289102  | 7.47673E-06 | 0.004858381 |
| 649.83999 | 301.894868  | 6.81335E-06 | 0.004427585 |
| 649.87999 | 337.487627  | 7.61663E-06 | 0.004949893 |
| 649.91999 | 425.995673  | 9.61413E-06 | 0.006248415 |
| 649.95999 | 579.484635  | 1.30782E-05 | 0.008500281 |
| 649.99999 | 907.296455  | 2.04764E-05 | 0.013309671 |
| 650.03999 | 1482.196873 | 3.34511E-05 | 0.021744565 |
| 650.07999 | 2231.422861 | 5.03601E-05 | 0.032738097 |
| 650.11999 | 2966.114341 | 6.69411E-05 | 0.043519727 |
| 650.15999 | 3386.647445 | 7.64319E-05 | 0.049692973 |
| 650.19999 | 3469.620336 | 7.83045E-05 | 0.050913584 |
| 650.23999 | 3228.287466 | 7.2858E-05  | 0.047375154 |
| 650.27999 | 2750.990145 | 6.2086E-05  | 0.040373294 |
| 650.31999 | 2146.27315  | 4.84384E-05 | 0.031500457 |
| 650.35999 | 1511.620532 | 3.41152E-05 | 0.022187142 |
| 650.39999 | 991.356537  | 2.23735E-05 | 0.014551748 |
| 650.43999 | 670.90476   | 1.51414E-05 | 0.009848563 |
| 650.47999 | 499.903768  | 1.12821E-05 | 0.007338801 |

|           |             |             |             |
|-----------|-------------|-------------|-------------|
| 650.51999 | 414.571685  | 9.35631E-06 | 0.006086464 |
| 650.55999 | 391.676807  | 8.8396E-06  | 0.00575069  |
| 650.59999 | 433.481721  | 9.78308E-06 | 0.006364871 |
| 650.63999 | 497.657171  | 1.12314E-05 | 0.007307617 |
| 650.67999 | 481.2512    | 1.08612E-05 | 0.007067146 |
| 650.71999 | 443.329438  | 1.00053E-05 | 0.006510667 |
| 650.75999 | 415.210729  | 9.37073E-06 | 0.006098095 |
| 650.79999 | 370.683652  | 8.36581E-06 | 0.005444471 |
| 650.83999 | 376.821617  | 8.50434E-06 | 0.005534964 |
| 650.87999 | 399.731197  | 9.02138E-06 | 0.005871833 |
| 650.91999 | 474.138502  | 1.07006E-05 | 0.006965264 |
| 650.95999 | 637.646803  | 1.43908E-05 | 0.009367835 |
| 650.99999 | 1026.848946 | 2.31746E-05 | 0.015086632 |
| 651.03999 | 1692.335975 | 3.81937E-05 | 0.024865604 |
| 651.07999 | 2480.497372 | 5.59814E-05 | 0.03644835  |
| 651.11999 | 3259.620082 | 7.35651E-05 | 0.047899697 |
| 651.15999 | 3734.389009 | 8.428E-05   | 0.054879737 |
| 651.19999 | 3864.703168 | 8.7221E-05  | 0.056798293 |
| 651.23999 | 3625.248482 | 8.18168E-05 | 0.053282378 |
| 651.27999 | 3126.924094 | 7.05703E-05 | 0.045961038 |
| 651.31999 | 2474.027054 | 5.58353E-05 | 0.036366676 |
| 651.35999 | 1748.278893 | 3.94562E-05 | 0.025700203 |
| 651.39999 | 1139.58433  | 2.57188E-05 | 0.016753246 |
| 651.43999 | 734.281131  | 1.65717E-05 | 0.01079547  |
| 651.47999 | 493.364353  | 1.11345E-05 | 0.007253934 |
| 651.51999 | 395.048457  | 8.91569E-06 | 0.005808752 |
| 651.55999 | 393.912392  | 8.89005E-06 | 0.005792404 |
| 651.59999 | 424.160627  | 9.57271E-06 | 0.006237581 |
| 651.63999 | 441.045595  | 9.95378E-06 | 0.006486284 |
| 651.67999 | 439.269631  | 9.9137E-06  | 0.006460562 |
| 651.71999 | 409.744321  | 9.24736E-06 | 0.006026688 |
| 651.75999 | 374.982301  | 8.46283E-06 | 0.005515733 |
| 651.79999 | 350.966085  | 7.92082E-06 | 0.005162788 |
| 651.83999 | 321.838542  | 7.26345E-06 | 0.004734606 |
| 651.87999 | 301.404155  | 6.80227E-06 | 0.004434265 |
| 651.91999 | 307.960918  | 6.95025E-06 | 0.004531006 |
| 651.95999 | 433.627384  | 9.78637E-06 | 0.006380319 |
| 651.99999 | 670.343109  | 1.51287E-05 | 0.009863919 |
| 652.03999 | 1021.596954 | 2.3056E-05  | 0.015033447 |
| 652.07999 | 1474.349553 | 3.3274E-05  | 0.02169732  |
| 652.11999 | 1864.961426 | 4.20896E-05 | 0.027447458 |
| 652.15999 | 2139.085993 | 4.82762E-05 | 0.0314838   |
| 652.19999 | 2215.309389 | 4.99964E-05 | 0.032607682 |
| 652.23999 | 2146.290553 | 4.84388E-05 | 0.031593715 |
| 652.27999 | 1934.622013 | 4.36617E-05 | 0.028479669 |
| 652.31999 | 1602.604695 | 3.61686E-05 | 0.023593472 |

|           |             |             |             |
|-----------|-------------|-------------|-------------|
| 652.35999 | 1210.152691 | 2.73115E-05 | 0.017816904 |
| 652.39999 | 904.73461   | 2.04186E-05 | 0.013321094 |
| 652.43999 | 717.304661  | 1.61886E-05 | 0.010562069 |
| 652.47999 | 597.604324  | 1.34871E-05 | 0.008800061 |
| 652.51999 | 517.799076  | 1.1686E-05  | 0.007625351 |
| 652.55999 | 471.783481  | 1.06475E-05 | 0.00694813  |
| 652.59999 | 493.61853   | 1.11403E-05 | 0.007270148 |
| 652.63999 | 542.557117  | 1.22448E-05 | 0.007991419 |
| 652.67999 | 551.863263  | 1.24548E-05 | 0.008128989 |
| 652.71999 | 542.534615  | 1.22443E-05 | 0.007992067 |
| 652.75999 | 535.060087  | 1.20756E-05 | 0.007882443 |
| 652.79999 | 510.302277  | 1.15168E-05 | 0.007518174 |
| 652.83999 | 437.890449  | 9.88258E-06 | 0.006451742 |
| 652.87999 | 414.341692  | 9.35111E-06 | 0.006105156 |
| 652.91999 | 471.93276   | 1.06509E-05 | 0.006954163 |
| 652.95999 | 685.601036  | 1.54731E-05 | 0.010103289 |
| 652.99999 | 1181.8369   | 2.66724E-05 | 0.017417085 |
| 653.03999 | 1970.865136 | 4.44797E-05 | 0.02904701  |
| 653.07999 | 2892.550043 | 6.52808E-05 | 0.042633601 |
| 653.11999 | 3733.531055 | 8.42606E-05 | 0.055032279 |
| 653.15999 | 4256.015479 | 9.60523E-05 | 0.062737546 |
| 653.19999 | 4362.09651  | 9.84464E-05 | 0.064305215 |
| 653.23999 | 4051.437487 | 9.14353E-05 | 0.059729195 |
| 653.27999 | 3379.76171  | 7.62765E-05 | 0.04982992  |
| 653.31999 | 2539.008974 | 5.73019E-05 | 0.037436474 |
| 653.35999 | 1735.56017  | 3.91692E-05 | 0.025591572 |
| 653.39999 | 1109.596284 | 2.5042E-05  | 0.01636247  |
| 653.43999 | 715.775271  | 1.61541E-05 | 0.010555703 |
| 653.47999 | 510.151573  | 1.15134E-05 | 0.007523783 |
| 653.51999 | 429.499257  | 9.6932E-06  | 0.0063347   |
| 653.55999 | 391.075461  | 8.82603E-06 | 0.005768339 |
| 653.59999 | 416.137185  | 9.39164E-06 | 0.006138374 |
| 653.63999 | 465.787727  | 1.05122E-05 | 0.006871181 |
| 653.67999 | 492.136607  | 1.11068E-05 | 0.007260318 |
| 653.71999 | 485.034843  | 1.09466E-05 | 0.007155986 |
| 653.75999 | 446.435861  | 1.00754E-05 | 0.006586917 |
| 653.79999 | 409.882112  | 9.25047E-06 | 0.006047956 |
| 653.83999 | 362.909559  | 8.19036E-06 | 0.005355187 |
| 653.87999 | 339.187096  | 7.65498E-06 | 0.005005438 |
| 653.91999 | 339.681919  | 7.66615E-06 | 0.005013047 |
| 653.95999 | 377.332138  | 8.51586E-06 | 0.005569032 |
| 653.99999 | 548.432727  | 1.23774E-05 | 0.008094795 |
| 654.03999 | 920.625858  | 2.07772E-05 | 0.013589148 |
| 654.07999 | 1412.794994 | 3.18848E-05 | 0.02085522  |
| 654.11999 | 1880.691428 | 4.24446E-05 | 0.027763852 |
| 654.15999 | 2240.734752 | 5.05703E-05 | 0.033081042 |

|           |             |             |             |
|-----------|-------------|-------------|-------------|
| 654.19999 | 2386.832573 | 5.38675E-05 | 0.035240109 |
| 654.23999 | 2277.924809 | 5.14096E-05 | 0.03363421  |
| 654.27999 | 2001.586698 | 4.5173E-05  | 0.029555806 |
| 654.31999 | 1615.567401 | 3.64611E-05 | 0.02385723  |
| 654.35999 | 1187.842787 | 2.6808E-05  | 0.017542055 |
| 654.39999 | 816.267628  | 1.8422E-05  | 0.012055372 |
| 654.43999 | 534.241327  | 1.20571E-05 | 0.007890637 |
| 654.47999 | 395.290361  | 8.92115E-06 | 0.005838716 |
| 654.51999 | 350.157145  | 7.90256E-06 | 0.005172383 |
| 654.55999 | 371.761791  | 8.39015E-06 | 0.005491854 |
| 654.59999 | 437.656744  | 9.8773E-06  | 0.006465683 |
| 654.63999 | 492.837488  | 1.11227E-05 | 0.007281335 |
| 654.67999 | 525.971987  | 1.18705E-05 | 0.007771349 |
| 654.71999 | 549.833362  | 1.2409E-05  | 0.008124403 |
| 654.75999 | 545.128228  | 1.23028E-05 | 0.008055371 |
| 654.79999 | 514.208247  | 1.1605E-05  | 0.00759893  |
| 654.83999 | 498.81249   | 1.12575E-05 | 0.007371863 |
| 654.87999 | 509.79109   | 1.15053E-05 | 0.007534574 |
| 654.91999 | 598.667414  | 1.35111E-05 | 0.008848683 |
| 654.95999 | 863.988509  | 1.9499E-05  | 0.012771076 |
| 654.99999 | 1381.508987 | 3.11787E-05 | 0.02042207  |
| 655.03999 | 2147.878062 | 4.84746E-05 | 0.031752812 |
| 655.07999 | 3020.189647 | 6.81615E-05 | 0.044651217 |
| 655.11999 | 3733.395504 | 8.42575E-05 | 0.055198796 |
| 655.15999 | 4056.704242 | 9.15542E-05 | 0.059982625 |
| 655.19999 | 3926.24365  | 8.86099E-05 | 0.058057173 |
| 655.23999 | 3486.289867 | 7.86807E-05 | 0.051554745 |
| 655.27999 | 2845.454552 | 6.42179E-05 | 0.042080735 |
| 655.31999 | 2202.927922 | 4.9717E-05  | 0.032580554 |
| 655.35999 | 1582.36841  | 3.57119E-05 | 0.023404118 |
| 655.39999 | 1095.144652 | 2.47159E-05 | 0.016198794 |
| 655.43999 | 756.476549  | 1.70726E-05 | 0.011190079 |
| 655.47999 | 500.092215  | 1.12864E-05 | 0.007397999 |
| 655.51999 | 384.778045  | 8.6839E-06  | 0.005692473 |
| 655.55999 | 367.651981  | 8.29739E-06 | 0.005439439 |
| 655.59999 | 384.429494  | 8.67604E-06 | 0.005688011 |
| 655.63999 | 419.371704  | 9.46464E-06 | 0.006205393 |
| 655.67999 | 440.152     | 9.93362E-06 | 0.006513274 |
| 655.71999 | 424.873792  | 9.58881E-06 | 0.006287574 |
| 655.75999 | 386.130875  | 8.71444E-06 | 0.005714578 |
| 655.79999 | 371.213109  | 8.37776E-06 | 0.005494137 |
| 655.83999 | 350.657974  | 7.91386E-06 | 0.005190227 |
| 655.87999 | 316.030465  | 7.13237E-06 | 0.004677977 |
| 655.91999 | 339.854289  | 7.67004E-06 | 0.005030931 |
| 655.95999 | 448.548587  | 1.01231E-05 | 0.00664036  |
| 655.99999 | 660.481863  | 1.49062E-05 | 0.009778438 |

|           |             |             |             |
|-----------|-------------|-------------|-------------|
| 656.03999 | 1037.045357 | 2.34047E-05 | 0.015354399 |
| 656.07999 | 1511.155924 | 3.41047E-05 | 0.022375401 |
| 656.11999 | 1985.396244 | 4.48076E-05 | 0.02939918  |
| 656.15999 | 2340.115247 | 5.28131E-05 | 0.03465387  |
| 656.19999 | 2478.34704  | 5.59328E-05 | 0.036703129 |
| 656.23999 | 2317.919026 | 5.23122E-05 | 0.03432936  |
| 656.27999 | 1888.410295 | 4.26188E-05 | 0.027969859 |
| 656.31999 | 1417.144275 | 3.1983E-05  | 0.020991064 |
| 656.35999 | 1061.827858 | 2.3964E-05  | 0.015728995 |
| 656.39999 | 794.48399   | 1.79304E-05 | 0.011769512 |
| 656.43999 | 593.051329  | 1.33843E-05 | 0.008786018 |
| 656.47999 | 456.757348  | 1.03084E-05 | 0.006767243 |
| 656.51999 | 371.752489  | 8.38994E-06 | 0.005508161 |
| 656.55999 | 327.53411   | 7.39199E-06 | 0.004853284 |
| 656.59999 | 369.220394  | 8.33279E-06 | 0.00547131  |
| 656.63999 | 443.23813   | 1.00033E-05 | 0.006568545 |
| 656.67999 | 495.216723  | 1.11764E-05 | 0.007339286 |
| 656.71999 | 527.471095  | 1.19043E-05 | 0.007817784 |
| 656.75999 | 509.506399  | 1.14988E-05 | 0.007551984 |
| 656.79999 | 437.479981  | 9.87331E-06 | 0.006484792 |
| 656.83999 | 383.874451  | 8.66351E-06 | 0.005690541 |
| 656.87999 | 424.218216  | 9.57401E-06 | 0.006288978 |
| 656.91999 | 475.572108  | 1.0733E-05  | 0.007050722 |
| 656.95999 | 639.324696  | 1.44287E-05 | 0.009479058 |
| 656.99999 | 934.328156  | 2.10865E-05 | 0.01385382  |
| 657.03999 | 1451.060395 | 3.27484E-05 | 0.021517016 |
| 657.07999 | 2145.612327 | 4.84235E-05 | 0.031818101 |
| 657.11999 | 2807.662013 | 6.3365E-05  | 0.041638422 |
| 657.15999 | 3233.32245  | 7.29716E-05 | 0.047954005 |
| 657.19999 | 3338.151536 | 7.53374E-05 | 0.049511759 |
| 657.23999 | 3096.783712 | 6.98901E-05 | 0.045934565 |
| 657.27999 | 2612.378407 | 5.89577E-05 | 0.038751744 |
| 657.31999 | 2100.761318 | 4.74113E-05 | 0.031164367 |
| 657.35999 | 1628.183957 | 3.67458E-05 | 0.024155248 |
| 657.39999 | 1146.592417 | 2.5877E-05  | 0.017011535 |
| 657.43999 | 754.281941  | 1.70231E-05 | 0.011191662 |
| 657.47999 | 512.344707  | 1.15629E-05 | 0.00760238  |
| 657.51999 | 385.823258  | 8.70749E-06 | 0.005725351 |
| 657.55999 | 349.487408  | 7.88744E-06 | 0.005186468 |
| 657.59999 | 361.380386  | 8.15585E-06 | 0.005363288 |
| 657.63999 | 392.658191  | 8.86175E-06 | 0.00582784  |
| 657.67999 | 428.338511  | 9.667E-06   | 0.006357795 |
| 657.71999 | 444.731396  | 1.0037E-05  | 0.006601515 |
| 657.75999 | 423.821865  | 9.56507E-06 | 0.00629152  |
| 657.79999 | 372.615165  | 8.40941E-06 | 0.005531707 |
| 657.83999 | 309.46018   | 6.98409E-06 | 0.004594411 |

|           |             |             |             |
|-----------|-------------|-------------|-------------|
| 657.87999 | 272.468177  | 6.14923E-06 | 0.004045454 |
| 657.91999 | 302.020422  | 6.81618E-06 | 0.004484501 |
| 657.95999 | 372.04592   | 8.39656E-06 | 0.005524599 |
| 657.99999 | 547.665409  | 1.236E-05   | 0.00813291  |
| 658.03999 | 802.372156  | 1.81084E-05 | 0.011916066 |
| 658.07999 | 1166.871452 | 2.63347E-05 | 0.017330315 |
| 658.11999 | 1580.699609 | 3.56742E-05 | 0.023477897 |
| 658.15999 | 1887.455159 | 4.25972E-05 | 0.028035795 |
| 658.19999 | 2003.928347 | 4.52259E-05 | 0.029767668 |
| 658.23999 | 1923.330529 | 4.34069E-05 | 0.028572152 |
| 658.27999 | 1694.027296 | 3.82318E-05 | 0.025167253 |
| 658.31999 | 1409.342147 | 3.18069E-05 | 0.020939111 |
| 658.35999 | 1076.74252  | 2.43006E-05 | 0.015998529 |
| 658.39999 | 752.183208  | 1.69757E-05 | 0.011176819 |
| 658.43999 | 542.957042  | 1.22538E-05 | 0.008068382 |
| 658.47999 | 431.590834  | 9.7404E-06  | 0.006413861 |
| 658.51999 | 353.316825  | 7.97387E-06 | 0.005250952 |
| 658.55999 | 325.803362  | 7.35293E-06 | 0.004842344 |
| 658.59999 | 363.071055  | 8.19401E-06 | 0.005396574 |
| 658.63999 | 437.167085  | 9.86625E-06 | 0.006498308 |
| 658.67999 | 473.815403  | 1.06934E-05 | 0.007043498 |
| 658.71999 | 451.345745  | 1.01862E-05 | 0.006709883 |
| 658.75999 | 409.302546  | 9.23739E-06 | 0.006085222 |
| 658.79999 | 382.08646   | 8.62316E-06 | 0.005680937 |
| 658.83999 | 352.208831  | 7.94886E-06 | 0.005237029 |
| 658.87999 | 361.11371   | 8.14983E-06 | 0.005369762 |
| 658.91999 | 414.472714  | 9.35407E-06 | 0.006163585 |
| 658.95999 | 538.215299  | 1.21468E-05 | 0.008004235 |
| 658.99999 | 786.702402  | 1.77548E-05 | 0.011700398 |
| 659.03999 | 1208.690431 | 2.72785E-05 | 0.017977596 |
| 659.07999 | 1782.638811 | 4.02317E-05 | 0.026515892 |
| 659.11999 | 2380.621664 | 5.37273E-05 | 0.035412747 |
| 659.15999 | 2879.220617 | 6.498E-05   | 0.042832215 |
| 659.19999 | 3124.570952 | 7.05172E-05 | 0.046484947 |
| 659.23999 | 3113.024062 | 7.02566E-05 | 0.046315971 |
| 659.27999 | 2766.411877 | 6.24341E-05 | 0.041161528 |
| 659.31999 | 2262.34361  | 5.10579E-05 | 0.033663523 |
| 659.35999 | 1740.292838 | 3.9276E-05  | 0.025897013 |
| 659.39999 | 1250.263246 | 2.82167E-05 | 0.018606092 |
| 659.43999 | 854.941078  | 1.92948E-05 | 0.012723782 |
| 659.47999 | 569.625681  | 1.28557E-05 | 0.008478049 |
| 659.51999 | 401.951009  | 9.07147E-06 | 0.005982819 |
| 659.55999 | 342.702689  | 7.73432E-06 | 0.00510125  |
| 659.59999 | 371.329564  | 8.38039E-06 | 0.005527706 |
| 659.63999 | 383.504667  | 8.65517E-06 | 0.005709294 |
| 659.67999 | 398.90352   | 9.0027E-06  | 0.005938899 |

|           |             |             |             |
|-----------|-------------|-------------|-------------|
| 659.71999 | 402.331519  | 9.08006E-06 | 0.005990298 |
| 659.75999 | 374.405696  | 8.44982E-06 | 0.00557485  |
| 659.79999 | 360.054151  | 8.12592E-06 | 0.005361482 |
| 659.83999 | 328.704198  | 7.4184E-06  | 0.004894954 |
| 659.87999 | 282.978635  | 6.38643E-06 | 0.00421428  |
| 659.91999 | 267.412153  | 6.03512E-06 | 0.003982696 |
| 659.95999 | 329.996237  | 7.44756E-06 | 0.004915089 |
| 659.99999 | 485.711813  | 1.09618E-05 | 0.007234814 |
| 660.03999 | 736.899157  | 1.66308E-05 | 0.010976985 |
| 660.07999 | 1081.970451 | 2.44186E-05 | 0.016118207 |
| 660.11999 | 1479.573334 | 3.33919E-05 | 0.022042667 |
| 660.15999 | 1776.290085 | 4.00884E-05 | 0.026464753 |
| 660.19999 | 1970.566587 | 4.44729E-05 | 0.029361037 |
| 660.23999 | 1978.82636  | 4.46594E-05 | 0.029485892 |
| 660.27999 | 1796.850931 | 4.05524E-05 | 0.026775953 |
| 660.31999 | 1491.557255 | 3.36624E-05 | 0.022227936 |
| 660.35999 | 1147.49213  | 2.58973E-05 | 0.01710154  |
| 660.39999 | 823.430755  | 1.85837E-05 | 0.012272666 |
| 660.43999 | 575.122239  | 1.29797E-05 | 0.008572318 |
| 660.47999 | 400.901863  | 9.0478E-06  | 0.005975889 |
| 660.51999 | 347.760359  | 7.84847E-06 | 0.005184069 |
| 660.55999 | 392.014937  | 8.84723E-06 | 0.005844127 |
| 660.59999 | 451.477996  | 1.01892E-05 | 0.006731005 |
| 660.63999 | 467.921426  | 1.05603E-05 | 0.006976579 |
| 660.67999 | 455.31117   | 1.02757E-05 | 0.006788975 |
| 660.71999 | 445.384076  | 1.00517E-05 | 0.006641358 |
| 660.75999 | 422.932164  | 9.54499E-06 | 0.006306947 |
| 660.79999 | 380.398376  | 8.58506E-06 | 0.005673009 |
| 660.83999 | 369.934351  | 8.3489E-06  | 0.005517289 |
| 660.87999 | 374.992826  | 8.46307E-06 | 0.005593071 |
| 660.91999 | 443.10772   | 1.00003E-05 | 0.006609414 |
| 660.95999 | 599.630601  | 1.35328E-05 | 0.008944657 |
| 660.99999 | 870.138442  | 1.96378E-05 | 0.012980594 |
| 661.03999 | 1283.862165 | 2.8975E-05  | 0.019153621 |
| 661.07999 | 1843.313448 | 4.1601E-05  | 0.0275016   |
| 661.11999 | 2406.873769 | 5.43198E-05 | 0.035911898 |
| 661.15999 | 2797.579891 | 6.31375E-05 | 0.041743977 |
| 661.19999 | 2941.111141 | 6.63768E-05 | 0.043888327 |
| 661.23999 | 2740.241332 | 6.18434E-05 | 0.040893349 |
| 661.27999 | 2348.047394 | 5.29922E-05 | 0.035042654 |
| 661.31999 | 1953.838052 | 4.40954E-05 | 0.029161172 |
| 661.35999 | 1557.378899 | 3.51479E-05 | 0.023245397 |
| 661.39999 | 1138.050491 | 2.56842E-05 | 0.016987539 |
| 661.43999 | 754.359796  | 1.70248E-05 | 0.011260917 |
| 661.47999 | 523.372707  | 1.18118E-05 | 0.007813265 |
| 661.51999 | 439.410256  | 9.91688E-06 | 0.006560213 |

|           |             |             |             |
|-----------|-------------|-------------|-------------|
| 661.55999 | 417.637022  | 9.42549E-06 | 0.006235524 |
| 661.59999 | 439.669043  | 9.92272E-06 | 0.00656487  |
| 661.63999 | 461.71824   | 1.04203E-05 | 0.006894512 |
| 661.67999 | 460.89642   | 1.04018E-05 | 0.006882656 |
| 661.71999 | 431.439982  | 9.737E-06   | 0.006443167 |
| 661.75999 | 410.264385  | 9.2591E-06  | 0.006127299 |
| 661.79999 | 364.653311  | 8.22972E-06 | 0.005446427 |
| 661.83999 | 304.52269   | 6.87265E-06 | 0.004548597 |
| 661.87999 | 311.340871  | 7.02653E-06 | 0.004650719 |
| 661.91999 | 380.968104  | 8.59792E-06 | 0.005691135 |
| 661.95999 | 440.230697  | 9.93539E-06 | 0.006576833 |
| 661.99999 | 538.385813  | 1.21506E-05 | 0.008043709 |
| 662.03999 | 735.12692   | 1.65908E-05 | 0.010983767 |
| 662.07999 | 1056.569789 | 2.38453E-05 | 0.015787502 |
| 662.11999 | 1411.747362 | 3.18612E-05 | 0.021095919 |
| 662.15999 | 1708.662056 | 3.85621E-05 | 0.025534295 |
| 662.19999 | 1899.074055 | 4.28595E-05 | 0.028381531 |
| 662.23999 | 1892.941751 | 4.27211E-05 | 0.028291593 |
| 662.27999 | 1698.943048 | 3.83428E-05 | 0.025393655 |
| 662.31999 | 1371.954815 | 3.09631E-05 | 0.020507486 |
| 662.35999 | 1028.432342 | 2.32103E-05 | 0.015373564 |
| 662.39999 | 734.809072  | 1.65836E-05 | 0.010984988 |
| 662.43999 | 478.492626  | 1.07989E-05 | 0.007153631 |
| 662.47999 | 337.168128  | 7.60942E-06 | 0.005041085 |
| 662.51999 | 313.553225  | 7.07646E-06 | 0.004688296 |
| 662.55999 | 327.814875  | 7.39833E-06 | 0.004901834 |
| 662.59999 | 374.177957  | 8.44468E-06 | 0.005595442 |
| 662.63999 | 421.958294  | 9.52301E-06 | 0.006310328 |
| 662.67999 | 449.582084  | 1.01464E-05 | 0.006723844 |
| 662.71999 | 456.636041  | 1.03056E-05 | 0.006829753 |
| 662.75999 | 432.744443  | 9.76644E-06 | 0.006472805 |
| 662.79999 | 419.817673  | 9.4747E-06  | 0.006279831 |
| 662.83999 | 395.519269  | 8.92632E-06 | 0.005916721 |
| 662.87999 | 363.245923  | 8.19795E-06 | 0.00543426  |
| 662.91999 | 395.505366  | 8.92601E-06 | 0.005917227 |
| 662.95999 | 586.901287  | 1.32455E-05 | 0.008781266 |
| 662.99999 | 944.443659  | 2.13148E-05 | 0.014131698 |
| 663.03999 | 1549.461071 | 3.49692E-05 | 0.023185964 |
| 663.07999 | 2368.220543 | 5.34474E-05 | 0.035439927 |
| 663.11999 | 3232.689056 | 7.29573E-05 | 0.048379437 |
| 663.15999 | 3877.133018 | 8.75015E-05 | 0.058027488 |
| 663.19999 | 4119.212321 | 9.29649E-05 | 0.06165431  |
| 663.23999 | 3827.726638 | 8.63865E-05 | 0.057294954 |
| 663.27999 | 3164.856616 | 7.14264E-05 | 0.047375706 |
| 663.31999 | 2413.22938  | 5.44632E-05 | 0.036126546 |
| 663.35999 | 1750.939505 | 3.95163E-05 | 0.02621351  |



|           |             |             |             |
|-----------|-------------|-------------|-------------|
| 663.39999 | 1279.856921 | 2.88846E-05 | 0.019162035 |
| 663.43999 | 975.304863  | 2.20113E-05 | 0.014603158 |
| 663.47999 | 740.581886  | 1.67139E-05 | 0.011089339 |
| 663.51999 | 570.557892  | 1.28767E-05 | 0.008543946 |
| 663.55999 | 481.954952  | 1.08771E-05 | 0.007217576 |
| 663.59999 | 448.404306  | 1.01199E-05 | 0.006715539 |
| 663.63999 | 434.05275   | 9.79597E-06 | 0.006500995 |
| 663.67999 | 459.810034  | 1.03773E-05 | 0.006887188 |
| 663.71999 | 482.587995  | 1.08913E-05 | 0.007228799 |
| 663.75999 | 437.210816  | 9.86724E-06 | 0.006549479 |
| 663.79999 | 362.336942  | 8.17744E-06 | 0.005428185 |
| 663.83999 | 315.490968  | 7.12019E-06 | 0.004726668 |
| 663.87999 | 292.390232  | 6.59884E-06 | 0.004380838 |
| 663.91999 | 312.230888  | 7.04662E-06 | 0.004678389 |
| 663.95999 | 370.690034  | 8.36596E-06 | 0.005554661 |
| 663.99999 | 544.819237  | 1.22958E-05 | 0.008164419 |
| 664.03999 | 817.658579  | 1.84534E-05 | 0.012253806 |
| 664.07999 | 1228.479037 | 2.77251E-05 | 0.018411658 |
| 664.11999 | 1740.892672 | 3.92895E-05 | 0.026092957 |
| 664.15999 | 2106.257362 | 4.75353E-05 | 0.031571041 |
| 664.19999 | 2150.903621 | 4.85429E-05 | 0.032242193 |
| 664.23999 | 2054.041363 | 4.63569E-05 | 0.030792075 |
| 664.27999 | 1811.019937 | 4.08722E-05 | 0.027150583 |
| 664.31999 | 1463.373523 | 3.30263E-05 | 0.021940033 |
| 664.35999 | 1141.469625 | 2.57614E-05 | 0.017111483 |
| 664.39999 | 870.767714  | 1.9652E-05  | 0.013056798 |
| 664.43999 | 676.000743  | 1.52564E-05 | 0.010136959 |
| 664.47999 | 540.285707  | 1.21935E-05 | 0.008102334 |
| 664.51999 | 442.439595  | 9.98525E-06 | 0.006635395 |
| 664.55999 | 422.424732  | 9.53354E-06 | 0.006335608 |
| 664.59999 | 432.904554  | 9.77005E-06 | 0.006493177 |
| 664.63999 | 429.626269  | 9.69607E-06 | 0.006444394 |
| 664.67999 | 444.243486  | 1.0026E-05  | 0.006664053 |
| 664.71999 | 457.20562   | 1.03185E-05 | 0.006858909 |
| 664.75999 | 448.939179  | 1.01319E-05 | 0.006735303 |
| 664.79999 | 400.449679  | 9.03759E-06 | 0.006008191 |
| 664.83999 | 345.956486  | 7.80776E-06 | 0.005190908 |
| 664.87999 | 342.574846  | 7.73144E-06 | 0.005140478 |
| 664.91999 | 404.279517  | 9.12403E-06 | 0.006066747 |
| 664.95999 | 550.470774  | 1.24234E-05 | 0.008261036 |
| 664.99999 | 880.828264  | 1.98791E-05 | 0.013219579 |
| 665.03999 | 1411.394787 | 3.18532E-05 | 0.021183661 |
| 665.07999 | 2067.017755 | 4.66497E-05 | 0.03102579  |
| 665.11999 | 2757.697714 | 6.22374E-05 | 0.041395336 |
| 665.15999 | 3202.502541 | 7.2276E-05  | 0.048075118 |
| 665.19999 | 3273.896561 | 7.38873E-05 | 0.049149821 |

|           |             |             |             |
|-----------|-------------|-------------|-------------|
| 665.23999 | 2949.296552 | 6.65615E-05 | 0.044279382 |
| 665.27999 | 2465.835143 | 5.56505E-05 | 0.037023141 |
| 665.31999 | 1947.097905 | 4.39433E-05 | 0.029236348 |
| 665.35999 | 1395.263666 | 3.14892E-05 | 0.020951626 |
| 665.39999 | 964.835571  | 2.1775E-05  | 0.014489081 |
| 665.43999 | 686.718462  | 1.54983E-05 | 0.010313175 |
| 665.47999 | 492.410071  | 1.1113E-05  | 0.007395485 |
| 665.51999 | 383.342682  | 8.65151E-06 | 0.005757753 |
| 665.55999 | 360.091758  | 8.12677E-06 | 0.005408853 |
| 665.59999 | 371.433109  | 8.38273E-06 | 0.005579544 |
| 665.63999 | 421.625791  | 9.51551E-06 | 0.006333902 |
| 665.67999 | 432.46661   | 9.76017E-06 | 0.006497149 |
| 665.71999 | 397.923515  | 8.98058E-06 | 0.005978551 |
| 665.75999 | 378.682598  | 8.54634E-06 | 0.00568981  |
| 665.79999 | 328.505378  | 7.41391E-06 | 0.00493618  |
| 665.83999 | 273.492755  | 6.17235E-06 | 0.004109798 |
| 665.87999 | 266.373258  | 6.01167E-06 | 0.004003053 |
| 665.91999 | 297.751748  | 6.71984E-06 | 0.004474877 |
| 665.95999 | 375.241865  | 8.46869E-06 | 0.005639806 |
| 665.99999 | 548.905335  | 1.2388E-05  | 0.008250427 |
| 666.03999 | 835.792167  | 1.88627E-05 | 0.012563289 |
| 666.07999 | 1161.022619 | 2.62027E-05 | 0.01745307  |
| 666.11999 | 1521.058711 | 3.43282E-05 | 0.022866685 |
| 666.15999 | 1904.002545 | 4.29707E-05 | 0.028625351 |
| 666.19999 | 2074.906136 | 4.68277E-05 | 0.031196641 |
| 666.23999 | 1986.15388  | 4.48247E-05 | 0.029864025 |
| 666.27999 | 1754.454131 | 3.95956E-05 | 0.026381747 |
| 666.31999 | 1414.324396 | 3.19193E-05 | 0.021268489 |
| 666.35999 | 1096.752558 | 2.47522E-05 | 0.016493861 |
| 666.39999 | 849.183276  | 1.91649E-05 | 0.012771478 |
| 666.43999 | 622.273282  | 1.40438E-05 | 0.009359377 |
| 666.47999 | 457.108504  | 1.03163E-05 | 0.006875609 |
| 666.51999 | 391.583327  | 8.83749E-06 | 0.005890364 |
| 666.55999 | 403.752113  | 9.11212E-06 | 0.006073776 |
| 666.59999 | 470.709569  | 1.06233E-05 | 0.007081465 |
| 666.63999 | 542.262212  | 1.22381E-05 | 0.008158409 |
| 666.67999 | 601.035465  | 1.35645E-05 | 0.009043203 |
| 666.71999 | 620.276271  | 1.39988E-05 | 0.009333261 |
| 666.75999 | 619.139828  | 1.39731E-05 | 0.00931672  |
| 666.79999 | 604.228887  | 1.36366E-05 | 0.009092888 |
| 666.83999 | 609.178642  | 1.37483E-05 | 0.009167925 |
| 666.87999 | 656.194852  | 1.48094E-05 | 0.009876095 |
| 666.91999 | 764.616222  | 1.72563E-05 | 0.011508587 |
| 666.95999 | 985.188448  | 2.22343E-05 | 0.014829409 |
| 666.99999 | 1391.545786 | 3.14053E-05 | 0.020947302 |
| 667.03999 | 2031.700521 | 4.58527E-05 | 0.030585552 |

|           |             |             |             |
|-----------|-------------|-------------|-------------|
| 667.07999 | 2879.393129 | 6.49839E-05 | 0.043349454 |
| 667.11999 | 3682.244893 | 8.31031E-05 | 0.055439765 |
| 667.15999 | 4231.399135 | 9.54968E-05 | 0.063711634 |
| 667.19999 | 4319.708303 | 9.74898E-05 | 0.065045193 |
| 667.23999 | 3879.40056  | 8.75527E-05 | 0.058418641 |
| 667.27999 | 3132.604572 | 7.06985E-05 | 0.047175709 |
| 667.31999 | 2315.3065   | 5.22532E-05 | 0.034869633 |
| 667.35999 | 1597.014117 | 3.60424E-05 | 0.024053245 |
| 667.39999 | 1042.716856 | 2.35327E-05 | 0.015705702 |
| 667.43999 | 676.974215  | 1.52784E-05 | 0.010197392 |
| 667.47999 | 468.644714  | 1.05767E-05 | 0.007059708 |
| 667.51999 | 381.218295  | 8.60357E-06 | 0.005743052 |
| 667.55999 | 360.40162   | 8.13376E-06 | 0.005429774 |
| 667.59999 | 403.588599  | 9.10843E-06 | 0.006080789 |
| 667.63999 | 471.03693   | 1.06306E-05 | 0.007097445 |
| 667.67999 | 503.122514  | 1.13548E-05 | 0.007581356 |
| 667.71999 | 485.082975  | 1.09476E-05 | 0.007309963 |
| 667.75999 | 418.693047  | 9.44932E-06 | 0.006309877 |
| 667.79999 | 373.022572  | 8.4186E-06  | 0.005621941 |
| 667.83999 | 358.948561  | 8.10097E-06 | 0.005410151 |
| 667.87999 | 380.008985  | 8.57627E-06 | 0.005727921 |
| 667.91999 | 424.961918  | 9.5908E-06  | 0.006405886 |
| 667.95999 | 490.555631  | 1.10712E-05 | 0.00739509  |
| 667.99999 | 668.417802  | 1.50853E-05 | 0.010076953 |
| 668.03999 | 981.96908   | 2.21617E-05 | 0.014804885 |
| 668.07999 | 1371.027948 | 3.09422E-05 | 0.020671859 |
| 668.11999 | 1785.883629 | 4.03049E-05 | 0.026928513 |
| 668.15999 | 2085.145705 | 4.70588E-05 | 0.03144283  |
| 668.19999 | 2217.987469 | 5.00569E-05 | 0.033448012 |
| 668.23999 | 2103.767789 | 4.74791E-05 | 0.031727439 |
| 668.27999 | 1821.936614 | 4.11186E-05 | 0.027478719 |
| 668.31999 | 1452.687047 | 3.27851E-05 | 0.021910953 |
| 668.35999 | 1056.938493 | 2.38536E-05 | 0.015942812 |
| 668.39999 | 729.314077  | 1.64596E-05 | 0.011001598 |
| 668.43999 | 553.014865  | 1.24808E-05 | 0.008342649 |
| 668.47999 | 444.540118  | 1.00327E-05 | 0.006706627 |
| 668.51999 | 388.653215  | 8.77136E-06 | 0.005863831 |
| 668.55999 | 372.750635  | 8.41246E-06 | 0.005624236 |
| 668.59999 | 385.7351    | 8.7055E-06  | 0.0058205   |
| 668.63999 | 415.635566  | 9.38032E-06 | 0.006272054 |
| 668.67999 | 436.384242  | 9.84858E-06 | 0.006585551 |
| 668.71999 | 463.322559  | 1.04565E-05 | 0.006992501 |
| 668.75999 | 476.923597  | 1.07635E-05 | 0.007198199 |
| 668.79999 | 471.151803  | 1.06332E-05 | 0.007111511 |
| 668.83999 | 458.616688  | 1.03503E-05 | 0.006922721 |
| 668.87999 | 461.441493  | 1.04141E-05 | 0.006965778 |

|            |             |             |             |
|------------|-------------|-------------|-------------|
| 668.91999  | 507.597879  | 1.14558E-05 | 0.007662998 |
| 668.95999  | 639.568234  | 1.44342E-05 | 0.009655878 |
| 668.99999  | 887.892574  | 2.00385E-05 | 0.013405755 |
| 669.03999  | 1297.674395 | 2.92867E-05 | 0.019593976 |
| 669.07999  | 1853.959305 | 4.18413E-05 | 0.027995163 |
| 669.11999  | 2488.974956 | 5.61727E-05 | 0.037586275 |
| 669.15999  | 3022.808183 | 6.82206E-05 | 0.045650476 |
| 669.19999  | 3168.782508 | 7.1515E-05  | 0.047857842 |
| 669.23999  | 2925.08992  | 6.60152E-05 | 0.044180015 |
| 669.27999  | 2490.105857 | 5.61982E-05 | 0.037612345 |
| 669.31999  | 1964.783803 | 4.43424E-05 | 0.029679277 |
| 669.35999  | 1431.315526 | 3.23028E-05 | 0.0216222   |
| 669.39999  | 979.41017   | 2.21039E-05 | 0.014796366 |
| 669.43999  | 665.727324  | 1.50245E-05 | 0.010058027 |
| 669.47999  | 440.238011  | 9.93556E-06 | 0.006651658 |
| 669.51999  | 318.283765  | 7.18322E-06 | 0.00480931  |
| 669.55999  | 318.576271  | 7.18982E-06 | 0.004814018 |
| 669.59999  | 429.798201  | 9.69995E-06 | 0.006495084 |
| 669.63999  | 556.922386  | 1.2569E-05  | 0.00841668  |
| 669.67999  | 606.013418  | 1.36769E-05 | 0.009159132 |
| 669.71999  | 555.271633  | 1.25317E-05 | 0.008392735 |
| 669.75999  | 467.672325  | 1.05547E-05 | 0.007069124 |
| 669.799989 | 415.633811  | 9.38028E-06 | 0.006282909 |
| 669.839989 | 352.958544  | 7.96578E-06 | 0.0053358   |
| 669.879989 | 326.576088  | 7.37037E-06 | 0.004937262 |
| 669.919989 | 355.389916  | 8.02066E-06 | 0.005373197 |
| 669.959989 | 419.806076  | 9.47444E-06 | 0.006347495 |
| 669.999989 | 543.152852  | 1.22582E-05 | 0.008212996 |
| 670.039989 | 776.115908  | 1.75159E-05 | 0.011736323 |
| 670.079989 | 1099.250473 | 2.48086E-05 | 0.016623714 |
| 670.119989 | 1501.382446 | 3.38841E-05 | 0.02270642  |
| 670.159989 | 1882.578701 | 4.24872E-05 | 0.028473207 |
| 670.199989 | 2056.268607 | 4.64071E-05 | 0.03110205  |
| 670.239989 | 2057.859375 | 4.6443E-05  | 0.031127969 |
| 670.279989 | 1879.970782 | 4.24283E-05 | 0.028438855 |
| 670.319989 | 1523.527908 | 3.43839E-05 | 0.023048217 |
| 670.359989 | 1149.400598 | 2.59404E-05 | 0.017389386 |
| 670.399989 | 811.879048  | 1.8323E-05  | 0.012283725 |
| 670.439989 | 572.156641  | 1.29128E-05 | 0.008657243 |
| 670.479989 | 435.258603  | 9.82318E-06 | 0.006586246 |
| 670.519989 | 357.048394  | 8.05808E-06 | 0.005403107 |
| 670.559989 | 372.00515   | 8.39564E-06 | 0.005629779 |
| 670.599989 | 436.265036  | 9.84589E-06 | 0.006602657 |
| 670.639989 | 496.117798  | 1.11967E-05 | 0.007508946 |
| 670.679989 | 515.099078  | 1.16251E-05 | 0.007796701 |
| 670.719989 | 509.259715  | 1.14933E-05 | 0.007708774 |

|            |             |             |             |
|------------|-------------|-------------|-------------|
| 670.759989 | 474.017759  | 1.06979E-05 | 0.007175737 |
| 670.799989 | 443.428112  | 1.00076E-05 | 0.006713068 |
| 670.839989 | 413.961233  | 9.34253E-06 | 0.006267342 |
| 670.879989 | 409.730981  | 9.24706E-06 | 0.006203666 |
| 670.919989 | 452.396703  | 1.021E-05   | 0.006850069 |
| 670.959989 | 606.727029  | 1.3693E-05  | 0.009187444 |
| 670.999989 | 893.506543  | 2.01652E-05 | 0.013530848 |
| 671.039989 | 1242.429193 | 2.80399E-05 | 0.018815892 |
| 671.079989 | 1692.4876   | 3.81971E-05 | 0.025633301 |
| 671.119989 | 2209.484523 | 4.9865E-05  | 0.03346539  |
| 671.159989 | 2681.688647 | 6.0522E-05  | 0.04061993  |
| 671.199989 | 2992.574832 | 6.75382E-05 | 0.04533167  |
| 671.239989 | 2945.358388 | 6.64726E-05 | 0.044619092 |
| 671.279989 | 2534.947736 | 5.72102E-05 | 0.038404089 |
| 671.319989 | 1935.105761 | 4.36726E-05 | 0.029318317 |
| 671.359989 | 1409.151641 | 3.18026E-05 | 0.021350986 |
| 671.399989 | 990.053499  | 2.23441E-05 | 0.015001848 |
| 671.439989 | 682.109415  | 1.53943E-05 | 0.010336321 |
| 671.479989 | 491.864675  | 1.11007E-05 | 0.007453898 |
| 671.519989 | 405.685695  | 9.15576E-06 | 0.006148277 |
| 671.559989 | 386.38391   | 8.72015E-06 | 0.005856102 |
| 671.599989 | 401.093132  | 9.05211E-06 | 0.006079399 |
| 671.639989 | 448.124469  | 1.01135E-05 | 0.006792661 |
| 671.679989 | 444.742113  | 1.00372E-05 | 0.006741793 |
| 671.719989 | 405.776715  | 9.15782E-06 | 0.006151488 |
| 671.759989 | 372.772126  | 8.41295E-06 | 0.005651482 |
| 671.799989 | 351.357042  | 7.92964E-06 | 0.005327131 |
| 671.839989 | 328.733024  | 7.41905E-06 | 0.004984412 |
| 671.879989 | 318.907031  | 7.19729E-06 | 0.004835713 |
| 671.919989 | 340.252742  | 7.67903E-06 | 0.005159694 |
| 671.959989 | 392.005165  | 8.84701E-06 | 0.005944837 |
| 671.999989 | 525.071698  | 1.18501E-05 | 0.007963292 |
| 672.039989 | 741.899391  | 1.67436E-05 | 0.011252393 |
| 672.079989 | 1072.865594 | 2.42131E-05 | 0.016273128 |
| 672.119989 | 1497.405204 | 3.37943E-05 | 0.022713858 |
| 672.159989 | 1837.241387 | 4.1464E-05  | 0.027870428 |
| 672.199989 | 1971.814391 | 4.45011E-05 | 0.029913642 |
| 672.239989 | 1867.120564 | 4.21383E-05 | 0.028327057 |
| 672.279989 | 1662.417239 | 3.75184E-05 | 0.025222897 |
| 672.319989 | 1430.644252 | 3.22876E-05 | 0.021707631 |
| 672.359989 | 1118.876917 | 2.52515E-05 | 0.016978094 |
| 672.399989 | 831.436555  | 1.87644E-05 | 0.012617159 |
| 672.439989 | 607.291124  | 1.37057E-05 | 0.009216271 |
| 672.479989 | 433.666115  | 9.78724E-06 | 0.006581723 |
| 672.519989 | 378.420896  | 8.54043E-06 | 0.005743612 |
| 672.559989 | 382.550568  | 8.63363E-06 | 0.005806636 |

|            |             |             |             |
|------------|-------------|-------------|-------------|
| 672.599989 | 384.797375  | 8.68434E-06 | 0.005841088 |
| 672.639989 | 421.617639  | 9.51532E-06 | 0.006400387 |
| 672.679989 | 482.023918  | 1.08786E-05 | 0.007317822 |
| 672.719989 | 519.440058  | 1.1723E-05  | 0.007886322 |
| 672.759989 | 486.625473  | 1.09825E-05 | 0.007388559 |
| 672.799989 | 445.252557  | 1.00487E-05 | 0.006760785 |
| 672.839989 | 430.956111  | 9.72608E-06 | 0.006544095 |
| 672.879989 | 397.101174  | 8.96202E-06 | 0.006030364 |
| 672.919989 | 404.006094  | 9.11785E-06 | 0.006135587 |
| 672.959989 | 550.317436  | 1.24199E-05 | 0.008358094 |
| 672.999989 | 832.324567  | 1.87844E-05 | 0.012641905 |
| 673.039989 | 1235.595611 | 2.78857E-05 | 0.018768172 |
| 673.079989 | 1750.544419 | 3.95073E-05 | 0.026591606 |
| 673.119989 | 2274.701954 | 5.13369E-05 | 0.034555863 |
| 673.159989 | 2700.354093 | 6.09432E-05 | 0.041024544 |
| 673.199989 | 2950.386512 | 6.65861E-05 | 0.044825771 |
| 673.239989 | 2905.911702 | 6.55824E-05 | 0.04415268  |
| 673.279989 | 2623.889655 | 5.92175E-05 | 0.039869981 |
| 673.319989 | 2254.097163 | 5.08718E-05 | 0.034253022 |
| 673.359989 | 1809.299728 | 4.08334E-05 | 0.027495561 |
| 673.399989 | 1316.975781 | 2.97223E-05 | 0.020015003 |
| 673.439989 | 894.970961  | 2.01982E-05 | 0.013602308 |
| 673.479989 | 624.636133  | 1.40972E-05 | 0.00949416  |
| 673.519989 | 464.084584  | 1.04737E-05 | 0.007054275 |
| 673.559989 | 390.356942  | 8.80981E-06 | 0.005933937 |
| 673.599989 | 419.357482  | 9.46431E-06 | 0.006375162 |
| 673.639989 | 496.037644  | 1.11949E-05 | 0.007541318 |
| 673.679989 | 501.668143  | 1.1322E-05  | 0.007627372 |
| 673.719989 | 452.241594  | 1.02065E-05 | 0.006876298 |
| 673.759989 | 394.985589  | 8.91427E-06 | 0.006006082 |
| 673.799989 | 343.632753  | 7.75531E-06 | 0.00522553  |
| 673.839989 | 312.800609  | 7.05947E-06 | 0.004756956 |
| 673.879989 | 285.717059  | 6.44824E-06 | 0.004345337 |
| 673.919989 | 297.479252  | 6.71369E-06 | 0.004524491 |
| 673.959989 | 378.140688  | 8.53411E-06 | 0.005751648 |
| 673.999989 | 510.111034  | 1.15125E-05 | 0.007759422 |
| 674.039989 | 720.639544  | 1.62638E-05 | 0.010962472 |
| 674.079989 | 1042.186504 | 2.35207E-05 | 0.015854832 |
| 674.119989 | 1404.965842 | 3.17081E-05 | 0.021375079 |
| 674.159989 | 1727.939551 | 3.89972E-05 | 0.026290344 |
| 674.199989 | 1858.514114 | 4.19441E-05 | 0.028278695 |
| 674.239989 | 1854.186911 | 4.18464E-05 | 0.028214527 |
| 674.279989 | 1724.611555 | 3.89221E-05 | 0.02624438  |
| 674.319989 | 1441.379389 | 3.25299E-05 | 0.021935579 |
| 674.359989 | 1102.263172 | 2.48765E-05 | 0.016775746 |
| 674.399989 | 792.305232  | 1.78812E-05 | 0.012059098 |

|            |             |             |             |
|------------|-------------|-------------|-------------|
| 674.439989 | 539.619789  | 1.21785E-05 | 0.008213645 |
| 674.479989 | 383.071617  | 8.64539E-06 | 0.005831144 |
| 674.519989 | 330.146785  | 7.45095E-06 | 0.005025817 |
| 674.559989 | 335.042336  | 7.56144E-06 | 0.005100644 |
| 674.599989 | 385.643091  | 8.70343E-06 | 0.005871332 |
| 674.639989 | 458.555811  | 1.0349E-05  | 0.006981826 |
| 674.679989 | 475.643571  | 1.07346E-05 | 0.007242429 |
| 674.719989 | 433.916217  | 9.79288E-06 | 0.006607455 |
| 674.759989 | 402.85426   | 9.09186E-06 | 0.006134823 |
| 674.799989 | 420.78373   | 9.4965E-06  | 0.00640824  |
| 674.839989 | 418.144627  | 9.43694E-06 | 0.006368426 |
| 674.879989 | 390.655815  | 8.81656E-06 | 0.005950118 |
| 674.919989 | 406.589153  | 9.17615E-06 | 0.006193168 |
| 674.959989 | 515.72919   | 1.16393E-05 | 0.007856055 |
| 674.999989 | 709.000467  | 1.60012E-05 | 0.010800778 |
| 675.039989 | 1037.720057 | 2.34199E-05 | 0.015809367 |
| 675.079989 | 1476.879953 | 3.33311E-05 | 0.022501174 |
| 675.119989 | 1938.100687 | 4.37402E-05 | 0.029529906 |
| 675.159989 | 2278.044941 | 5.14123E-05 | 0.034711529 |
| 675.199989 | 2482.529435 | 5.60272E-05 | 0.037829586 |
| 675.239989 | 2529.822423 | 5.70946E-05 | 0.038552536 |
| 675.279989 | 2402.311582 | 5.42168E-05 | 0.036611538 |
| 675.319989 | 2080.118745 | 4.69454E-05 | 0.031703155 |
| 675.359989 | 1630.896187 | 3.68071E-05 | 0.024858012 |
| 675.399989 | 1164.082769 | 2.62717E-05 | 0.017743924 |
| 675.439989 | 807.607788  | 1.82266E-05 | 0.012310963 |
| 675.479989 | 561.040103  | 1.26619E-05 | 0.008552856 |
| 675.519989 | 396.836552  | 8.95605E-06 | 0.00604999  |
| 675.559989 | 333.58865   | 7.52863E-06 | 0.005086042 |
| 675.599989 | 380.877784  | 8.59588E-06 | 0.005807377 |
| 675.639989 | 455.261166  | 1.02746E-05 | 0.006941938 |
| 675.679989 | 467.884358  | 1.05595E-05 | 0.007134842 |
| 675.719989 | 469.358713  | 1.05928E-05 | 0.007157748 |
| 675.759989 | 465.979584  | 1.05165E-05 | 0.007106637 |
| 675.799989 | 428.949091  | 9.68078E-06 | 0.006542273 |
| 675.839989 | 373.657828  | 8.43294E-06 | 0.005699316 |
| 675.879989 | 306.160499  | 6.90962E-06 | 0.004670071 |
| 675.919989 | 265.698255  | 5.99644E-06 | 0.004053113 |
| 675.959989 | 297.342853  | 6.71061E-06 | 0.004536107 |
| 675.999989 | 425.655266  | 9.60645E-06 | 0.006493958 |
| 676.039989 | 648.817671  | 1.46429E-05 | 0.009899193 |
| 676.079989 | 978.175933  | 2.20761E-05 | 0.014925188 |
| 676.119989 | 1310.243938 | 2.95704E-05 | 0.019993125 |
| 676.159989 | 1568.119378 | 3.53903E-05 | 0.023929485 |
| 676.199989 | 1761.077768 | 3.97451E-05 | 0.026875617 |
| 676.239989 | 1787.973326 | 4.03521E-05 | 0.027287682 |

|            |             |             |             |
|------------|-------------|-------------|-------------|
| 676.279989 | 1628.510038 | 3.67532E-05 | 0.024855456 |
| 676.319989 | 1355.616941 | 3.05944E-05 | 0.020691595 |
| 676.359989 | 1050.320796 | 2.37043E-05 | 0.016032625 |
| 676.399989 | 755.975162  | 1.70613E-05 | 0.011540267 |
| 676.439989 | 524.977043  | 1.1848E-05  | 0.008014461 |
| 676.479989 | 385.093994  | 8.69104E-06 | 0.005879311 |
| 676.519989 | 339.725458  | 7.66713E-06 | 0.005186967 |
| 676.559989 | 318.111439  | 7.17933E-06 | 0.004857249 |
| 676.599989 | 333.22142   | 7.52034E-06 | 0.005088264 |
| 676.639989 | 380.012386  | 8.57635E-06 | 0.005803102 |
| 676.679989 | 427.802934  | 9.65492E-06 | 0.006533289 |
| 676.719989 | 462.776446  | 1.04442E-05 | 0.007067812 |
| 676.759989 | 435.203189  | 9.82193E-06 | 0.006647089 |
| 676.799989 | 375.596514  | 8.47669E-06 | 0.005737024 |
| 676.839989 | 357.214925  | 8.06184E-06 | 0.005456578 |
| 676.879989 | 382.693195  | 8.63685E-06 | 0.005846113 |
| 676.919989 | 428.009319  | 9.65957E-06 | 0.006538759 |
| 676.959989 | 532.528585  | 1.20184E-05 | 0.008135995 |
| 676.999989 | 787.48085   | 1.77723E-05 | 0.012031878 |
| 677.039989 | 1273.457409 | 2.87402E-05 | 0.019458238 |
| 677.079989 | 1891.342509 | 4.2685E-05  | 0.028901136 |
| 677.119989 | 2477.943673 | 5.59237E-05 | 0.03786708  |
| 677.159989 | 2948.466927 | 6.65428E-05 | 0.045060116 |
| 677.199989 | 3145.863336 | 7.09978E-05 | 0.048079678 |
| 677.239989 | 2910.221508 | 6.56796E-05 | 0.044480883 |
| 677.279989 | 2419.441276 | 5.46034E-05 | 0.036981803 |
| 677.319989 | 1984.815844 | 4.47945E-05 | 0.03034023  |
| 677.359989 | 1556.056637 | 3.5118E-05  | 0.023787549 |
| 677.399989 | 1115.996251 | 2.51865E-05 | 0.017061322 |
| 677.439989 | 732.122473  | 1.6523E-05  | 0.01119333  |
| 677.479989 | 495.875403  | 1.11912E-05 | 0.007581826 |
| 677.519989 | 408.890825  | 9.2281E-06  | 0.00625222  |
| 677.559989 | 399.682862  | 9.02029E-06 | 0.006111785 |
| 677.599989 | 476.975889  | 1.07647E-05 | 0.007294148 |
| 677.639989 | 616.281842  | 1.39086E-05 | 0.009425039 |
| 677.679989 | 699.597693  | 1.57889E-05 | 0.010699852 |
| 677.719989 | 655.496886  | 1.47937E-05 | 0.010025953 |
| 677.759989 | 572.915316  | 1.29299E-05 | 0.008763369 |
| 677.799989 | 465.26171   | 1.05003E-05 | 0.007117109 |
| 677.839989 | 351.053512  | 7.92279E-06 | 0.005370383 |
| 677.879989 | 298.521158  | 6.73721E-06 | 0.004567018 |
| 677.919989 | 331.59564   | 7.48365E-06 | 0.005073317 |
| 677.959989 | 391.491467  | 8.83542E-06 | 0.005990059 |
| 677.999989 | 527.487409  | 1.19047E-05 | 0.008071357 |
| 678.039989 | 759.0109    | 1.71298E-05 | 0.011614702 |
| 678.079989 | 1088.090356 | 2.45567E-05 | 0.016651396 |



|            |             |             |             |
|------------|-------------|-------------|-------------|
| 678.119989 | 1490.259309 | 3.36331E-05 | 0.022807262 |
| 678.159989 | 1790.629886 | 4.0412E-05  | 0.027405817 |
| 678.199989 | 1971.387488 | 4.44915E-05 | 0.030174114 |
| 678.239989 | 1971.000792 | 4.44827E-05 | 0.030169975 |
| 678.279989 | 1789.459462 | 4.03856E-05 | 0.027392749 |
| 678.319989 | 1516.494439 | 3.42252E-05 | 0.023215615 |
| 678.359989 | 1219.256421 | 2.75169E-05 | 0.018666377 |
| 678.399989 | 909.939981  | 2.05361E-05 | 0.013931675 |
| 678.439989 | 650.930258  | 1.46906E-05 | 0.009966683 |
| 678.479989 | 432.654705  | 9.76441E-06 | 0.00662496  |
| 678.519989 | 342.308949  | 7.72544E-06 | 0.005241863 |
| 678.559989 | 382.297423  | 8.62792E-06 | 0.005854562 |
| 678.599989 | 460.736549  | 1.03982E-05 | 0.007056206 |
| 678.639989 | 507.579214  | 1.14554E-05 | 0.007774063 |
| 678.679989 | 552.47484   | 1.24686E-05 | 0.008462181 |
| 678.719989 | 564.147204  | 1.2732E-05  | 0.008641474 |
| 678.759989 | 516.749742  | 1.16623E-05 | 0.007915917 |
| 678.799989 | 435.965351  | 9.83913E-06 | 0.006678802 |
| 678.839989 | 369.69714   | 8.34355E-06 | 0.005663935 |
| 678.879989 | 372.45399   | 8.40577E-06 | 0.005706508 |
| 678.919989 | 435.156122  | 9.82087E-06 | 0.006667583 |
| 678.959989 | 551.613167  | 1.24491E-05 | 0.008452469 |
| 678.999989 | 742.469664  | 1.67565E-05 | 0.011377667 |
| 679.039989 | 1120.470034 | 2.52874E-05 | 0.017171188 |
| 679.079989 | 1637.992185 | 3.69672E-05 | 0.025103687 |
| 679.119989 | 2121.306097 | 4.78749E-05 | 0.032512818 |
| 679.159989 | 2502.129134 | 5.64696E-05 | 0.038351872 |
| 679.199989 | 2679.416555 | 6.04707E-05 | 0.041071698 |
| 679.239989 | 2591.340713 | 5.8483E-05  | 0.039723959 |
| 679.279989 | 2269.38283  | 5.12168E-05 | 0.034790554 |
| 679.319989 | 1872.812656 | 4.22668E-05 | 0.028712664 |
| 679.359989 | 1486.431319 | 3.35467E-05 | 0.022790275 |
| 679.399989 | 1154.901719 | 2.60645E-05 | 0.017708237 |
| 679.439989 | 836.145969  | 1.88706E-05 | 0.012821474 |
| 679.479989 | 604.054259  | 1.36327E-05 | 0.009263122 |
| 679.519989 | 474.842373  | 1.07165E-05 | 0.007282097 |
| 679.559989 | 423.111056  | 9.54903E-06 | 0.006489137 |
| 679.599989 | 427.130849  | 9.63975E-06 | 0.006551173 |
| 679.639989 | 449.653665  | 1.01481E-05 | 0.006897025 |
| 679.679989 | 466.939126  | 1.05382E-05 | 0.00716258  |
| 679.719989 | 477.553382  | 1.07777E-05 | 0.007325828 |
| 679.759989 | 434.320719  | 9.80201E-06 | 0.006663017 |
| 679.799989 | 384.814954  | 8.68474E-06 | 0.005903884 |
| 679.839989 | 331.018635  | 7.47063E-06 | 0.005078833 |
| 679.879989 | 282.002452  | 6.3644E-06  | 0.00432703  |
| 679.919989 | 278.194524  | 6.27846E-06 | 0.004268852 |

|            |             |             |             |
|------------|-------------|-------------|-------------|
| 679.959989 | 320.555015  | 7.23448E-06 | 0.004919157 |
| 679.999989 | 469.402393  | 1.05938E-05 | 0.007203755 |
| 680.039989 | 692.369892  | 1.56258E-05 | 0.010626185 |
| 680.079989 | 989.469538  | 2.23309E-05 | 0.015186832 |
| 680.119989 | 1370.838289 | 3.09379E-05 | 0.021041492 |
| 680.159989 | 1687.488967 | 3.80843E-05 | 0.0259034   |
| 680.199989 | 1798.043231 | 4.05793E-05 | 0.027602061 |
| 680.239989 | 1803.767489 | 4.07085E-05 | 0.027691563 |
| 680.279989 | 1678.867965 | 3.78897E-05 | 0.025775613 |
| 680.319989 | 1416.683741 | 3.19726E-05 | 0.021751584 |
| 680.359989 | 1134.983395 | 2.5615E-05  | 0.017427417 |
| 680.399989 | 872.227179  | 1.9685E-05  | 0.013393641 |
| 680.439989 | 670.877027  | 1.51408E-05 | 0.010302379 |
| 680.479989 | 539.908746  | 1.2185E-05  | 0.008291641 |
| 680.519989 | 425.784068  | 9.60935E-06 | 0.006539357 |
| 680.559989 | 358.694749  | 8.09524E-06 | 0.005509297 |
| 680.599989 | 353.737895  | 7.98337E-06 | 0.005433483 |
| 680.639989 | 370.086807  | 8.35234E-06 | 0.005684939 |
| 680.679989 | 422.968804  | 9.54582E-06 | 0.006497646 |
| 680.719989 | 446.237668  | 1.0071E-05  | 0.006855506 |
| 680.759989 | 429.634892  | 9.69626E-06 | 0.006600827 |
| 680.799989 | 423.158825  | 9.55011E-06 | 0.006501712 |
| 680.839989 | 415.272045  | 9.37211E-06 | 0.006380908 |
| 680.879989 | 404.548929  | 9.13011E-06 | 0.006216506 |
| 680.919989 | 431.010381  | 9.7273E-06  | 0.006623516 |
| 680.959989 | 538.243575  | 1.21474E-05 | 0.008271899 |
| 680.999989 | 807.056605  | 1.82141E-05 | 0.012403831 |
| 681.039989 | 1170.845485 | 2.64244E-05 | 0.01799604  |
| 681.079989 | 1586.041814 | 3.57948E-05 | 0.024379091 |
| 681.119989 | 2056.629262 | 4.64153E-05 | 0.03161436  |
| 681.159989 | 2500.53805  | 5.64337E-05 | 0.038440352 |
| 681.199989 | 2762.850998 | 6.23537E-05 | 0.042475339 |
| 681.239989 | 2705.330806 | 6.10555E-05 | 0.041593481 |
| 681.279989 | 2406.514931 | 5.43117E-05 | 0.037001468 |
| 681.319989 | 1998.393375 | 4.5101E-05  | 0.030728182 |
| 681.359989 | 1527.893427 | 3.44824E-05 | 0.023494946 |
| 681.399989 | 1154.448183 | 2.60543E-05 | 0.017753391 |
| 681.439989 | 850.596855  | 1.91968E-05 | 0.013081458 |
| 681.479989 | 606.946614  | 1.36979E-05 | 0.009334872 |
| 681.519989 | 451.768263  | 1.01958E-05 | 0.006948628 |
| 681.559989 | 405.977784  | 9.16235E-06 | 0.006244693 |
| 681.599989 | 427.257499  | 9.64261E-06 | 0.006572401 |
| 681.639989 | 425.479279  | 9.60247E-06 | 0.006545431 |
| 681.679989 | 423.357761  | 9.55459E-06 | 0.006513176 |
| 681.719989 | 424.529791  | 9.58105E-06 | 0.006531591 |
| 681.759989 | 425.898284  | 9.61193E-06 | 0.00655303  |

|            |             |             |             |
|------------|-------------|-------------|-------------|
| 681.799989 | 403.602834  | 9.10875E-06 | 0.006210348 |
| 681.839989 | 336.545469  | 7.59536E-06 | 0.005178822 |
| 681.879989 | 297.484535  | 6.71381E-06 | 0.004578014 |
| 681.919989 | 317.375048  | 7.16271E-06 | 0.004884397 |
| 681.959989 | 352.858973  | 7.96354E-06 | 0.005430813 |
| 681.999989 | 445.008143  | 1.00432E-05 | 0.006849472 |
| 682.039989 | 663.270581  | 1.49691E-05 | 0.01020952  |
| 682.079989 | 954.448573  | 2.15406E-05 | 0.014692395 |
| 682.119989 | 1241.476043 | 2.80184E-05 | 0.019111901 |
| 682.159989 | 1519.141532 | 3.42849E-05 | 0.023387793 |
| 682.199989 | 1700.140088 | 3.83698E-05 | 0.026175873 |
| 682.239989 | 1713.321983 | 3.86673E-05 | 0.026380372 |
| 682.279989 | 1596.089572 | 3.60215E-05 | 0.024576761 |
| 682.319989 | 1371.54758  | 3.09539E-05 | 0.021120477 |
| 682.359989 | 1059.263347 | 2.39061E-05 | 0.016312565 |
| 682.399989 | 785.61717   | 1.77303E-05 | 0.012099146 |
| 682.439989 | 607.1522    | 1.37026E-05 | 0.009351188 |
| 682.479989 | 456.748622  | 1.03082E-05 | 0.007035127 |
| 682.519989 | 380.86539   | 8.5956E-06  | 0.00586667  |
| 682.559989 | 367.7932    | 8.30058E-06 | 0.005665644 |
| 682.599989 | 383.364321  | 8.652E-06   | 0.005905854 |
| 682.639989 | 402.203821  | 9.07718E-06 | 0.006196446 |
| 682.679989 | 441.073806  | 9.95442E-06 | 0.006795684 |
| 682.719989 | 480.845635  | 1.0852E-05  | 0.007408888 |
| 682.759989 | 459.708763  | 1.0375E-05  | 0.007083626 |
| 682.799989 | 413.372661  | 9.32925E-06 | 0.006370009 |
| 682.839989 | 403.070777  | 9.09675E-06 | 0.006211622 |
| 682.879989 | 395.600002  | 8.92814E-06 | 0.006096849 |
| 682.919989 | 414.988672  | 9.36572E-06 | 0.006396035 |
| 682.959989 | 519.287315  | 1.17196E-05 | 0.008004012 |
| 682.999989 | 703.478672  | 1.58765E-05 | 0.010843672 |
| 683.039989 | 1034.246523 | 2.33415E-05 | 0.01594318  |
| 683.079989 | 1492.577212 | 3.36854E-05 | 0.023009815 |
| 683.119989 | 1972.089303 | 4.45073E-05 | 0.030403832 |
| 683.159989 | 2333.710027 | 5.26686E-05 | 0.03598107  |
| 683.199989 | 2560.40218  | 5.77847E-05 | 0.039478514 |
| 683.239989 | 2524.379994 | 5.69717E-05 | 0.038925371 |
| 683.279989 | 2207.764256 | 4.98262E-05 | 0.034045221 |
| 683.319989 | 1783.47423  | 4.02505E-05 | 0.027503991 |
| 683.359989 | 1355.353437 | 3.05884E-05 | 0.020902915 |
| 683.399989 | 1039.391557 | 2.34576E-05 | 0.016030937 |
| 683.439989 | 814.224467  | 1.83759E-05 | 0.012558833 |
| 683.479989 | 647.418039  | 1.46113E-05 | 0.009986547 |
| 683.519989 | 533.960578  | 1.20507E-05 | 0.008236926 |
| 683.559989 | 479.904282  | 1.08308E-05 | 0.007403482 |
| 683.599989 | 473.767895  | 1.06923E-05 | 0.007309244 |

|            |             |             |             |
|------------|-------------|-------------|-------------|
| 683.639989 | 486.156154  | 1.09719E-05 | 0.007500807 |
| 683.679989 | 493.236309  | 1.11317E-05 | 0.007610491 |
| 683.719989 | 471.563615  | 1.06425E-05 | 0.007276513 |
| 683.759989 | 444.133455  | 1.00235E-05 | 0.00685365  |
| 683.799989 | 420.58387   | 9.49199E-06 | 0.006490624 |
| 683.839989 | 360.971453  | 8.14662E-06 | 0.005570987 |
| 683.879989 | 326.802884  | 7.37549E-06 | 0.005043947 |
| 683.919989 | 359.870732  | 8.12178E-06 | 0.005554648 |
| 683.959989 | 425.647944  | 9.60628E-06 | 0.006570312 |
| 683.999989 | 553.483586  | 1.24914E-05 | 0.008544086 |
| 684.039989 | 771.838363  | 1.74193E-05 | 0.011915509 |
| 684.079989 | 1157.707552 | 2.61278E-05 | 0.017873537 |
| 684.119989 | 1617.064895 | 3.64949E-05 | 0.024966892 |
| 684.159989 | 1927.434213 | 4.34995E-05 | 0.029760621 |
| 684.199989 | 2106.679667 | 4.75448E-05 | 0.032530169 |
| 684.239989 | 2076.011401 | 4.68527E-05 | 0.032058481 |
| 684.279989 | 1788.461492 | 4.03631E-05 | 0.027619651 |
| 684.319989 | 1452.360757 | 3.27778E-05 | 0.022430476 |
| 684.359989 | 1180.87342  | 2.66507E-05 | 0.018238651 |
| 684.399989 | 900.635393  | 2.03261E-05 | 0.013911173 |
| 684.439989 | 676.03987   | 1.52573E-05 | 0.010442691 |
| 684.479989 | 545.570432  | 1.23128E-05 | 0.008427841 |
| 684.519989 | 484.060868  | 1.09246E-05 | 0.007478093 |
| 684.559989 | 456.877786  | 1.03111E-05 | 0.007058563 |
| 684.599989 | 480.720438  | 1.08492E-05 | 0.007427356 |
| 684.639989 | 536.339601  | 1.21044E-05 | 0.008287182 |
| 684.679989 | 527.797588  | 1.19117E-05 | 0.008155673 |
| 684.719989 | 481.306734  | 1.08624E-05 | 0.007437718 |
| 684.759989 | 437.389044  | 9.87126E-06 | 0.006759445 |
| 684.799989 | 394.757251  | 8.90912E-06 | 0.006100966 |
| 684.839989 | 352.100663  | 7.94642E-06 | 0.005442027 |
| 684.879989 | 328.018555  | 7.40292E-06 | 0.005070113 |
| 684.919989 | 363.021159  | 8.19288E-06 | 0.005611469 |
| 684.959989 | 492.910492  | 1.11243E-05 | 0.007619703 |
| 684.999989 | 742.046685  | 1.6747E-05  | 0.011471667 |
| 685.039989 | 1097.352961 | 2.47657E-05 | 0.016965514 |
| 685.079989 | 1551.431241 | 3.50136E-05 | 0.023987146 |
| 685.119989 | 2098.460933 | 4.73593E-05 | 0.032446831 |
| 685.159989 | 2548.096775 | 5.7507E-05  | 0.039401492 |
| 685.199989 | 2723.044875 | 6.14553E-05 | 0.042109191 |
| 685.239989 | 2613.538695 | 5.89839E-05 | 0.040418146 |
| 685.279989 | 2243.674787 | 5.06366E-05 | 0.034700259 |
| 685.319989 | 1799.681434 | 4.06163E-05 | 0.027835164 |
| 685.359989 | 1464.537067 | 3.30526E-05 | 0.022652903 |
| 685.399989 | 1162.042548 | 2.62257E-05 | 0.017975082 |
| 685.439989 | 878.789841  | 1.98331E-05 | 0.013594374 |

|            |             |             |             |
|------------|-------------|-------------|-------------|
| 685.479989 | 666.81339   | 1.5049E-05  | 0.010315822 |
| 685.519989 | 512.133572  | 1.15581E-05 | 0.007923337 |
| 685.559989 | 415.022862  | 9.36649E-06 | 0.006421289 |
| 685.599989 | 414.265662  | 9.3494E-06  | 0.006409948 |
| 685.639989 | 451.96959   | 1.02003E-05 | 0.00699375  |
| 685.679989 | 467.871533  | 1.05592E-05 | 0.007240238 |
| 685.719989 | 458.968197  | 1.03583E-05 | 0.007102875 |
| 685.759989 | 432.922742  | 9.77046E-06 | 0.006700193 |
| 685.799989 | 397.691075  | 8.97533E-06 | 0.006155284 |
| 685.839989 | 325.435194  | 7.34462E-06 | 0.005037233 |
| 685.879989 | 302.206421  | 6.82038E-06 | 0.004677961 |
| 685.919989 | 330.367134  | 7.45593E-06 | 0.005114169 |
| 685.959989 | 393.294438  | 8.87611E-06 | 0.006088655 |
| 685.999989 | 501.510556  | 1.13184E-05 | 0.007764419 |
| 686.039989 | 718.711907  | 1.62203E-05 | 0.011127793 |
| 686.079989 | 1040.335011 | 2.34789E-05 | 0.016108412 |
| 686.119989 | 1453.599375 | 3.28057E-05 | 0.022508656 |
| 686.159989 | 1765.001079 | 3.98336E-05 | 0.027332233 |
| 686.199989 | 1863.744103 | 4.20621E-05 | 0.028863018 |
| 686.239989 | 1752.959208 | 3.95618E-05 | 0.027148922 |
| 686.279989 | 1534.156788 | 3.46238E-05 | 0.023761609 |
| 686.319989 | 1339.649628 | 3.0234E-05  | 0.020750216 |
| 686.359989 | 1060.984584 | 2.39449E-05 | 0.016434852 |
| 686.399989 | 778.905406  | 1.75788E-05 | 0.012066095 |
| 686.439989 | 582.981896  | 1.31571E-05 | 0.009031552 |
| 686.479989 | 453.658565  | 1.02384E-05 | 0.007028485 |
| 686.519989 | 387.82738   | 8.75272E-06 | 0.00600892  |
| 686.559989 | 365.390517  | 8.24636E-06 | 0.005661617 |
| 686.599989 | 379.191129  | 8.55782E-06 | 0.005875796 |
| 686.639989 | 419.160869  | 9.45988E-06 | 0.00649553  |
| 686.679989 | 472.591447  | 1.06657E-05 | 0.007323944 |
| 686.719989 | 501.806801  | 1.13251E-05 | 0.007777159 |
| 686.759989 | 453.250467  | 1.02292E-05 | 0.007025027 |
| 686.799989 | 387.329667  | 8.74149E-06 | 0.006003656 |
| 686.839989 | 334.843005  | 7.55694E-06 | 0.005190409 |
| 686.879989 | 337.828762  | 7.62432E-06 | 0.005236996 |
| 686.919989 | 373.942738  | 8.43937E-06 | 0.00579717  |
| 686.959989 | 477.032828  | 1.0766E-05  | 0.007395788 |
| 686.999989 | 693.898574  | 1.56603E-05 | 0.010758643 |
| 687.039989 | 1098.591562 | 2.47937E-05 | 0.017034251 |
| 687.079989 | 1593.300151 | 3.59586E-05 | 0.024706411 |
| 687.119989 | 2039.689355 | 4.60329E-05 | 0.031630159 |
| 687.159989 | 2367.492084 | 5.3431E-05  | 0.036715644 |
| 687.199989 | 2551.98397  | 5.75947E-05 | 0.039579093 |
| 687.239989 | 2467.763779 | 5.5694E-05  | 0.038275138 |
| 687.279989 | 2118.841403 | 4.78193E-05 | 0.032865247 |

|            |             |             |             |
|------------|-------------|-------------|-------------|
| 687.319989 | 1702.957198 | 3.84334E-05 | 0.026416025 |
| 687.359989 | 1265.069014 | 2.85508E-05 | 0.019624709 |
| 687.399989 | 889.891819  | 2.00836E-05 | 0.013805479 |
| 687.439989 | 596.431222  | 1.34606E-05 | 0.00925337  |
| 687.479989 | 401.140207  | 9.05318E-06 | 0.006223877 |
| 687.519989 | 331.320818  | 7.47745E-06 | 0.005140896 |
| 687.559989 | 337.407267  | 7.61481E-06 | 0.00523564  |
| 687.599989 | 378.731753  | 8.54745E-06 | 0.005877225 |
| 687.639989 | 432.24598   | 9.75519E-06 | 0.006708059 |
| 687.679989 | 450.859666  | 1.01753E-05 | 0.006997333 |
| 687.719989 | 437.965739  | 9.88428E-06 | 0.006797615 |
| 687.759989 | 384.576575  | 8.67936E-06 | 0.005969315 |
| 687.799989 | 321.709997  | 7.26055E-06 | 0.004993804 |
| 687.839989 | 285.216646  | 6.43694E-06 | 0.004427586 |
| 687.879989 | 264.848529  | 5.97726E-06 | 0.004111639 |
| 687.919989 | 282.794288  | 6.38227E-06 | 0.004390493 |
| 687.959989 | 339.161186  | 7.6544E-06  | 0.005265918 |
| 687.999989 | 471.200161  | 1.06343E-05 | 0.00731642  |
| 688.039989 | 694.995537  | 1.56851E-05 | 0.010791963 |
| 688.079989 | 990.210112  | 2.23477E-05 | 0.01537698  |
| 688.119989 | 1290.180406 | 2.91176E-05 | 0.020036385 |
| 688.159989 | 1557.78683  | 3.51571E-05 | 0.024193695 |
| 688.199989 | 1707.11113  | 3.85271E-05 | 0.026514364 |
| 688.239989 | 1738.730036 | 3.92407E-05 | 0.027007029 |
| 688.279989 | 1583.921639 | 3.57469E-05 | 0.024603879 |
| 688.319989 | 1278.375291 | 2.88511E-05 | 0.019858823 |
| 688.359989 | 1009.419992 | 2.27812E-05 | 0.015681669 |
| 688.399989 | 770.021167  | 1.73783E-05 | 0.011963225 |
| 688.439989 | 551.450396  | 1.24455E-05 | 0.008567957 |
| 688.479989 | 397.208764  | 8.96445E-06 | 0.006171843 |
| 688.519989 | 344.694369  | 7.77927E-06 | 0.005356184 |
| 688.559989 | 347.660986  | 7.84622E-06 | 0.005402596 |
| 688.599989 | 384.166117  | 8.67009E-06 | 0.005970227 |
| 688.639989 | 427.681419  | 9.65217E-06 | 0.006646873 |
| 688.679989 | 452.590752  | 1.02143E-05 | 0.007034414 |
| 688.719989 | 442.021284  | 9.9758E-06  | 0.006870536 |
| 688.759989 | 415.951818  | 9.38745E-06 | 0.006465702 |
| 688.799989 | 393.715004  | 8.8856E-06  | 0.006120401 |
| 688.839989 | 361.948484  | 8.16867E-06 | 0.005626909 |
| 688.879989 | 351.363473  | 7.92978E-06 | 0.00546267  |
| 688.919989 | 367.009363  | 8.28289E-06 | 0.005706249 |
| 688.959989 | 471.199913  | 1.06343E-05 | 0.007326625 |
| 688.999989 | 737.893877  | 1.66532E-05 | 0.01147408  |
| 689.039989 | 1201.436251 | 2.71147E-05 | 0.018683142 |
| 689.079989 | 1831.903745 | 4.13435E-05 | 0.028488989 |
| 689.119989 | 2572.965138 | 5.80682E-05 | 0.040015984 |

|            |             |             |             |
|------------|-------------|-------------|-------------|
| 689.159989 | 3179.723434 | 7.17619E-05 | 0.04945545  |
| 689.199989 | 3404.143627 | 7.68268E-05 | 0.052949016 |
| 689.239989 | 3237.09777  | 7.30568E-05 | 0.05035366  |
| 689.279989 | 2831.887996 | 6.39118E-05 | 0.044053102 |
| 689.319989 | 2303.17801  | 5.19795E-05 | 0.035830522 |
| 689.359989 | 1682.118309 | 3.79631E-05 | 0.02617022  |
| 689.399989 | 1124.57855  | 2.53802E-05 | 0.01749709  |
| 689.439989 | 740.514993  | 1.67124E-05 | 0.011522191 |
| 689.479989 | 506.214395  | 1.14246E-05 | 0.007877001 |
| 689.519989 | 376.070575  | 8.48739E-06 | 0.005852224 |
| 689.559989 | 342.325653  | 7.72581E-06 | 0.005327412 |
| 689.599989 | 351.215019  | 7.92643E-06 | 0.005466069 |
| 689.639989 | 392.228779  | 8.85206E-06 | 0.006104733 |
| 689.679989 | 442.58633   | 9.98856E-06 | 0.006888908 |
| 689.719989 | 439.600513  | 9.92117E-06 | 0.00684283  |
| 689.759989 | 411.550965  | 9.28813E-06 | 0.006406582 |
| 689.799989 | 358.091357  | 8.08162E-06 | 0.005574704 |
| 689.839989 | 312.269484  | 7.04749E-06 | 0.004861639 |
| 689.879989 | 292.790108  | 6.60786E-06 | 0.004558634 |
| 689.919989 | 299.490163  | 6.75908E-06 | 0.004663222 |
| 689.959989 | 340.187264  | 7.67755E-06 | 0.005297204 |
| 689.999989 | 464.144708  | 1.04751E-05 | 0.007227819 |
| 690.039989 | 700.478507  | 1.58088E-05 | 0.010908721 |
| 690.079989 | 1081.55907  | 2.44093E-05 | 0.016844357 |
| 690.119989 | 1498.433183 | 3.38175E-05 | 0.023338167 |
| 690.159989 | 1878.350509 | 4.23918E-05 | 0.029257093 |
| 690.199989 | 2114.519241 | 4.77218E-05 | 0.032937554 |
| 690.239989 | 2166.514674 | 4.88952E-05 | 0.033749435 |
| 690.279989 | 1993.35525  | 4.49873E-05 | 0.031053799 |
| 690.319989 | 1646.289645 | 3.71545E-05 | 0.025648469 |
| 690.359989 | 1266.653709 | 2.85866E-05 | 0.019735052 |
| 690.399989 | 911.957222  | 2.05816E-05 | 0.014209539 |
| 690.439989 | 641.596006  | 1.44799E-05 | 0.009997521 |
| 690.479989 | 460.807743  | 1.03998E-05 | 0.007180846 |
| 690.519989 | 373.931263  | 8.43911E-06 | 0.005827373 |
| 690.559989 | 361.053446  | 8.14847E-06 | 0.00562701  |
| 690.599989 | 358.160407  | 8.08318E-06 | 0.005582245 |
| 690.639989 | 384.550286  | 8.67876E-06 | 0.005993902 |
| 690.679989 | 446.675991  | 1.00809E-05 | 0.006962645 |
| 690.719989 | 487.614893  | 1.10048E-05 | 0.007601228 |
| 690.759989 | 483.756011  | 1.09177E-05 | 0.00754151  |
| 690.799989 | 467.231676  | 1.05448E-05 | 0.007284326 |
| 690.839989 | 404.018989  | 9.11815E-06 | 0.00629918  |
| 690.879989 | 343.645312  | 7.7556E-06  | 0.005358186 |
| 690.919989 | 368.195409  | 8.30966E-06 | 0.005741308 |
| 690.959989 | 476.309229  | 1.07496E-05 | 0.007427568 |

|            |             |             |             |
|------------|-------------|-------------|-------------|
| 690.999989 | 701.625526  | 1.58347E-05 | 0.010941785 |
| 691.039989 | 1137.206453 | 2.56652E-05 | 0.017735656 |
| 691.079989 | 1715.408805 | 3.87144E-05 | 0.026754738 |
| 691.119989 | 2234.691944 | 5.04339E-05 | 0.034855866 |
| 691.159989 | 2600.731009 | 5.86949E-05 | 0.04056755  |
| 691.199989 | 2794.038542 | 6.30576E-05 | 0.043585383 |
| 691.239989 | 2721.917949 | 6.14299E-05 | 0.042462801 |
| 691.279989 | 2429.018867 | 5.48196E-05 | 0.037895673 |
| 691.319989 | 2013.135374 | 4.54337E-05 | 0.031409198 |
| 691.359989 | 1557.441837 | 3.51493E-05 | 0.024300815 |
| 691.399989 | 1109.24765  | 2.50342E-05 | 0.017308628 |
| 691.439989 | 726.791192  | 1.64027E-05 | 0.011341458 |
| 691.479989 | 506.505341  | 1.14311E-05 | 0.007904391 |
| 691.519989 | 372.32631   | 8.40289E-06 | 0.005810764 |
| 691.559989 | 319.534392  | 7.21145E-06 | 0.004987148 |
| 691.599989 | 319.729469  | 7.21585E-06 | 0.004990481 |
| 691.639989 | 362.340041  | 8.17751E-06 | 0.005655893 |
| 691.679989 | 415.964235  | 9.38773E-06 | 0.006493307 |
| 691.719989 | 422.593898  | 9.53736E-06 | 0.00659718  |
| 691.759989 | 391.13134   | 8.82729E-06 | 0.006106366 |
| 691.799989 | 357.969173  | 8.07887E-06 | 0.005588959 |
| 691.839989 | 332.639651  | 7.50721E-06 | 0.005193791 |
| 691.879989 | 316.740538  | 7.14839E-06 | 0.00494583  |
| 691.919989 | 343.0794    | 7.74282E-06 | 0.005357415 |
| 691.959989 | 414.955283  | 9.36496E-06 | 0.00648018  |
| 691.999989 | 538.516277  | 1.21536E-05 | 0.008410265 |
| 692.039989 | 718.065243  | 1.62057E-05 | 0.011215015 |
| 692.079989 | 1001.686241 | 2.26067E-05 | 0.015645619 |
| 692.119989 | 1364.361598 | 3.07917E-05 | 0.021311579 |
| 692.159989 | 1700.753605 | 3.83836E-05 | 0.02656762  |
| 692.199989 | 1892.432612 | 4.27096E-05 | 0.029563563 |
| 692.239989 | 1877.012155 | 4.23615E-05 | 0.029324359 |
| 692.279989 | 1749.966564 | 3.94943E-05 | 0.027341119 |
| 692.319989 | 1512.798338 | 3.41418E-05 | 0.023637017 |
| 692.359989 | 1197.521714 | 2.70264E-05 | 0.018711996 |
| 692.399989 | 879.025736  | 1.98384E-05 | 0.013736099 |
| 692.439989 | 602.021612  | 1.35868E-05 | 0.009408036 |
| 692.479989 | 419.262958  | 9.46218E-06 | 0.006552371 |
| 692.519989 | 341.267057  | 7.70192E-06 | 0.005333735 |
| 692.559989 | 349.766696  | 7.89375E-06 | 0.005466893 |
| 692.599989 | 390.452861  | 8.81198E-06 | 0.006103175 |
| 692.639989 | 449.391006  | 1.01421E-05 | 0.007024844 |
| 692.679989 | 487.572922  | 1.10038E-05 | 0.007622141 |
| 692.719989 | 486.248093  | 1.09739E-05 | 0.007601869 |
| 692.759989 | 441.128162  | 9.95565E-06 | 0.006896875 |
| 692.799989 | 377.236665  | 8.51371E-06 | 0.005898295 |



|            |             |             |             |
|------------|-------------|-------------|-------------|
| 692.839989 | 308.387296  | 6.95987E-06 | 0.004822077 |
| 692.879989 | 310.271481  | 7.0024E-06  | 0.004851819 |
| 692.919989 | 377.907123  | 8.52884E-06 | 0.005909802 |
| 692.959989 | 477.144441  | 1.07685E-05 | 0.00746213  |
| 692.999989 | 683.880311  | 1.54342E-05 | 0.010695918 |
| 693.039989 | 1035.601184 | 2.33721E-05 | 0.016197783 |
| 693.079989 | 1460.160814 | 3.29538E-05 | 0.022839616 |
| 693.119989 | 1874.752321 | 4.23105E-05 | 0.029326287 |
| 693.159989 | 2208.673369 | 4.98467E-05 | 0.034551725 |
| 693.199989 | 2440.991396 | 5.50898E-05 | 0.038188232 |
| 693.239989 | 2533.778805 | 5.71839E-05 | 0.039642137 |
| 693.279989 | 2353.695284 | 5.31196E-05 | 0.036826772 |
| 693.319989 | 1957.445844 | 4.41768E-05 | 0.030628677 |
| 693.359989 | 1439.764635 | 3.24935E-05 | 0.022529681 |
| 693.399989 | 983.417984  | 2.21944E-05 | 0.015389579 |
| 693.439989 | 686.422566  | 1.54916E-05 | 0.010742496 |
| 693.479989 | 506.89619   | 1.14399E-05 | 0.00793337  |
| 693.519989 | 400.230063  | 9.03264E-06 | 0.006264313 |
| 693.559989 | 350.06372   | 7.90045E-06 | 0.005479436 |
| 693.599989 | 352.891744  | 7.96428E-06 | 0.005524021 |
| 693.639989 | 368.746454  | 8.32209E-06 | 0.005772537 |
| 693.679989 | 408.847406  | 9.22712E-06 | 0.006400666 |
| 693.719989 | 446.519718  | 1.00773E-05 | 0.006990844 |
| 693.759989 | 440.137193  | 9.93328E-06 | 0.006891315 |
| 693.799989 | 386.690534  | 8.72707E-06 | 0.006054839 |
| 693.839989 | 331.209159  | 7.47493E-06 | 0.005186405 |
| 693.879989 | 282.153058  | 6.3678E-06  | 0.00441849  |
| 693.919989 | 290.352741  | 6.55286E-06 | 0.004547158 |
| 693.959989 | 372.815024  | 8.41392E-06 | 0.005838921 |
| 693.999989 | 508.079086  | 1.14666E-05 | 0.007957846 |
| 694.039989 | 704.50392   | 1.58997E-05 | 0.011035008 |
| 694.079989 | 978.551455  | 2.20845E-05 | 0.01532844  |
| 694.119989 | 1293.194836 | 2.91856E-05 | 0.020258313 |
| 694.159989 | 1527.323956 | 3.44696E-05 | 0.023927399 |
| 694.199989 | 1685.472218 | 3.80388E-05 | 0.026406507 |
| 694.239989 | 1699.004971 | 3.83442E-05 | 0.02662006  |
| 694.279989 | 1523.964569 | 3.43938E-05 | 0.023878898 |
| 694.319989 | 1334.984127 | 3.01287E-05 | 0.020918981 |
| 694.359989 | 1091.483469 | 2.46333E-05 | 0.017104351 |
| 694.399989 | 813.211755  | 1.83531E-05 | 0.012744362 |
| 694.439989 | 572.213373  | 1.29141E-05 | 0.008968039 |
| 694.479989 | 406.151219  | 9.16627E-06 | 0.006365789 |
| 694.519989 | 336.586363  | 7.59629E-06 | 0.005275772 |
| 694.559989 | 348.031649  | 7.85459E-06 | 0.005455484 |
| 694.599989 | 389.626126  | 8.79332E-06 | 0.006107839 |
| 694.639989 | 421.880064  | 9.52125E-06 | 0.006613838 |

|            |             |             |             |
|------------|-------------|-------------|-------------|
| 694.679989 | 459.544633  | 1.03713E-05 | 0.007204722 |
| 694.719989 | 463.496801  | 1.04605E-05 | 0.007267103 |
| 694.759989 | 430.848806  | 9.72366E-06 | 0.006755608 |
| 694.799989 | 408.960325  | 9.22966E-06 | 0.006412771 |
| 694.839989 | 381.860776  | 8.61807E-06 | 0.005988177 |
| 694.879989 | 375.155609  | 8.46674E-06 | 0.005883368 |
| 694.919989 | 402.402849  | 9.08167E-06 | 0.006311035 |
| 694.959989 | 480.612905  | 1.08468E-05 | 0.007538067 |
| 694.999989 | 697.493576  | 1.57415E-05 | 0.010940313 |
| 695.039989 | 1067.795971 | 2.40987E-05 | 0.016749538 |
| 695.079989 | 1520.884553 | 3.43242E-05 | 0.023858096 |
| 695.119989 | 1989.526333 | 4.49008E-05 | 0.03121147  |
| 695.159989 | 2346.383135 | 5.29546E-05 | 0.036811919 |
| 695.199989 | 2496.577729 | 5.63443E-05 | 0.039170544 |
| 695.239989 | 2478.598083 | 5.59385E-05 | 0.038890687 |
| 695.279989 | 2263.485973 | 5.10837E-05 | 0.035517492 |
| 695.319989 | 1851.177628 | 4.17785E-05 | 0.029049427 |
| 695.359989 | 1439.591887 | 3.24896E-05 | 0.022591957 |
| 695.399989 | 1071.88113  | 2.41909E-05 | 0.016822327 |
| 695.439989 | 750.487005  | 1.69374E-05 | 0.011778978 |
| 695.479989 | 529.738991  | 1.19555E-05 | 0.008314791 |
| 695.519989 | 411.516772  | 9.28736E-06 | 0.006459545 |
| 695.559989 | 363.764222  | 8.20965E-06 | 0.005710305 |
| 695.599989 | 368.824096  | 8.32385E-06 | 0.005790067 |
| 695.639989 | 409.892132  | 9.25069E-06 | 0.006435153 |
| 695.679989 | 422.507384  | 9.5354E-06  | 0.006633589 |
| 695.719989 | 414.607827  | 9.35712E-06 | 0.006509936 |
| 695.759989 | 392.716273  | 8.86306E-06 | 0.006166562 |
| 695.799989 | 388.54974   | 8.76903E-06 | 0.006101488 |
| 695.839989 | 361.253717  | 8.15299E-06 | 0.005673179 |
| 695.879989 | 314.749665  | 7.10346E-06 | 0.004943157 |
| 695.919989 | 310.975423  | 7.01828E-06 | 0.004884163 |
| 695.959989 | 352.691067  | 7.95975E-06 | 0.005539665 |
| 695.999989 | 479.205557  | 1.0815E-05  | 0.007527241 |
| 696.039989 | 716.211487  | 1.61639E-05 | 0.011250718 |
| 696.079989 | 991.445853  | 2.23756E-05 | 0.015575174 |
| 696.119989 | 1283.281176 | 2.89619E-05 | 0.020160936 |
| 696.159989 | 1551.518541 | 3.50156E-05 | 0.024376468 |
| 696.199989 | 1740.338954 | 3.9277E-05  | 0.027344665 |
| 696.239989 | 1785.927958 | 4.03059E-05 | 0.028062584 |
| 696.279989 | 1766.354904 | 3.98642E-05 | 0.027756624 |
| 696.319989 | 1690.752118 | 3.81579E-05 | 0.026570123 |
| 696.359989 | 1496.63826  | 3.3777E-05  | 0.02352098  |
| 696.399989 | 1263.348245 | 2.8512E-05  | 0.019855764 |
| 696.439989 | 962.595333  | 2.17244E-05 | 0.015129766 |
| 696.479989 | 684.610286  | 1.54507E-05 | 0.010761104 |

|            |             |             |             |
|------------|-------------|-------------|-------------|
| 696.519989 | 524.529915  | 1.18379E-05 | 0.008245341 |
| 696.559989 | 465.998924  | 1.05169E-05 | 0.007325684 |
| 696.599989 | 433.058435  | 9.77353E-06 | 0.006808238 |
| 696.639989 | 446.376959  | 1.00741E-05 | 0.007018025 |
| 696.679989 | 450.632214  | 1.01701E-05 | 0.007085334 |
| 696.719989 | 432.028347  | 9.75028E-06 | 0.006793214 |
| 696.759989 | 398.432098  | 8.99206E-06 | 0.006265306 |
| 696.799989 | 367.762366  | 8.29988E-06 | 0.005783359 |
| 696.839989 | 357.340512  | 8.06468E-06 | 0.00561979  |
| 696.879989 | 372.084476  | 8.39743E-06 | 0.005852    |
| 696.919989 | 412.573666  | 9.31121E-06 | 0.00648917  |
| 696.959989 | 508.738183  | 1.14815E-05 | 0.008002155 |
| 696.999989 | 726.517521  | 1.63965E-05 | 0.011428352 |
| 697.039989 | 1092.626648 | 2.46591E-05 | 0.017188352 |
| 697.079989 | 1538.544556 | 3.47228E-05 | 0.024204574 |
| 697.119989 | 1966.839505 | 4.43888E-05 | 0.030944339 |
| 697.159989 | 2255.13668  | 5.08953E-05 | 0.035482162 |
| 697.199989 | 2338.494437 | 5.27766E-05 | 0.036795819 |
| 697.239989 | 2291.973818 | 5.17267E-05 | 0.036065893 |
| 697.279989 | 2105.841732 | 4.75259E-05 | 0.033138869 |
| 697.319989 | 1767.503585 | 3.98901E-05 | 0.02781616  |
| 697.359989 | 1376.345607 | 3.10622E-05 | 0.021661538 |
| 697.399989 | 1028.736599 | 2.32172E-05 | 0.016191642 |
| 697.439989 | 747.112279  | 1.68613E-05 | 0.011759733 |
| 697.479989 | 545.582699  | 1.2313E-05  | 0.0085881   |
| 697.519989 | 410.243002  | 9.25861E-06 | 0.006458068 |
| 697.559989 | 363.971161  | 8.21432E-06 | 0.005729982 |
| 697.599989 | 340.169068  | 7.67714E-06 | 0.005355574 |
| 697.639989 | 373.361131  | 8.42624E-06 | 0.005878482 |
| 697.679989 | 428.615305  | 9.67325E-06 | 0.006748833 |
| 697.719989 | 442.407288  | 9.98452E-06 | 0.006966397 |
| 697.759989 | 435.628871  | 9.83154E-06 | 0.006860053 |
| 697.799989 | 376.655546  | 8.50059E-06 | 0.005931712 |
| 697.839989 | 328.918236  | 7.42323E-06 | 0.005180224 |
| 697.879989 | 328.900671  | 7.42283E-06 | 0.005180245 |
| 697.919989 | 334.833808  | 7.55673E-06 | 0.005273995 |
| 697.959989 | 388.040464  | 8.75753E-06 | 0.006112407 |
| 697.999989 | 519.695023  | 1.17288E-05 | 0.008186697 |
| 698.039989 | 751.184657  | 1.69532E-05 | 0.011834006 |
| 698.079989 | 1017.642651 | 2.29668E-05 | 0.016032648 |
| 698.119989 | 1314.087664 | 2.96571E-05 | 0.020704234 |
| 698.159989 | 1553.179151 | 3.50531E-05 | 0.024472665 |
| 698.199989 | 1636.941611 | 3.69435E-05 | 0.025793946 |
| 698.239989 | 1616.538722 | 3.6483E-05  | 0.025473909 |
| 698.279989 | 1470.940571 | 3.31971E-05 | 0.023180857 |
| 698.319989 | 1176.240636 | 2.65461E-05 | 0.018537681 |

|            |             |             |             |
|------------|-------------|-------------|-------------|
| 698.359989 | 909.19246   | 2.05192E-05 | 0.014329793 |
| 698.399989 | 713.95983   | 1.61131E-05 | 0.011253374 |
| 698.439989 | 546.918261  | 1.23432E-05 | 0.008620973 |
| 698.479989 | 424.195566  | 9.5735E-06  | 0.0066869   |
| 698.519989 | 360.42008   | 8.13418E-06 | 0.005681887 |
| 698.559989 | 353.669961  | 7.98184E-06 | 0.005575793 |
| 698.599989 | 376.719594  | 8.50204E-06 | 0.005939523 |
| 698.639989 | 404.588666  | 9.131E-06   | 0.006379284 |
| 698.679989 | 432.411247  | 9.75892E-06 | 0.006818362 |
| 698.719989 | 448.520395  | 1.01225E-05 | 0.00707278  |
| 698.759989 | 443.893415  | 1.00181E-05 | 0.007000217 |
| 698.799989 | 425.27092   | 9.59777E-06 | 0.006706923 |
| 698.839989 | 397.533837  | 8.97178E-06 | 0.006269842 |
| 698.879989 | 402.874778  | 9.09232E-06 | 0.006354442 |
| 698.919989 | 463.06908   | 1.04508E-05 | 0.00730429  |
| 698.959989 | 560.041743  | 1.26394E-05 | 0.008834408 |
| 698.999989 | 711.265221  | 1.60523E-05 | 0.011220533 |
| 699.039989 | 999.898113  | 2.25663E-05 | 0.015774751 |
| 699.079989 | 1417.588021 | 3.1993E-05  | 0.022365657 |
| 699.119989 | 1794.51258  | 4.04996E-05 | 0.028314114 |
| 699.159989 | 2066.094551 | 4.66289E-05 | 0.032601045 |
| 699.199989 | 2206.953401 | 4.98079E-05 | 0.034825658 |
| 699.239989 | 2169.806055 | 4.89695E-05 | 0.034241433 |
| 699.279989 | 1945.554488 | 4.39085E-05 | 0.030704304 |
| 699.319989 | 1599.098907 | 3.60894E-05 | 0.025238063 |
| 699.359989 | 1244.741493 | 2.80921E-05 | 0.019646478 |
| 699.399989 | 965.112486  | 2.17812E-05 | 0.015233802 |
| 699.439989 | 800.32769   | 1.80623E-05 | 0.012633482 |
| 699.479989 | 627.180806  | 1.41546E-05 | 0.009900857 |
| 699.519989 | 466.624304  | 1.05311E-05 | 0.007366687 |
| 699.559989 | 367.886815  | 8.30269E-06 | 0.005808232 |
| 699.599989 | 348.934811  | 7.87497E-06 | 0.005509331 |
| 699.639989 | 410.42435   | 9.26271E-06 | 0.006480559 |
| 699.679989 | 472.735434  | 1.0669E-05  | 0.007464872 |
| 699.719989 | 484.349035  | 1.09311E-05 | 0.007648697 |
| 699.759989 | 438.223642  | 9.8901E-06  | 0.006920694 |
| 699.799989 | 352.147448  | 7.94748E-06 | 0.005561645 |
| 699.839989 | 292.918683  | 6.61077E-06 | 0.004626479 |
| 699.879989 | 279.164554  | 6.30036E-06 | 0.004409492 |
| 699.919989 | 294.511924  | 6.64672E-06 | 0.004652175 |
| 699.959989 | 360.741132  | 8.14142E-06 | 0.005698672 |
| 699.999989 | 484.071316  | 1.09248E-05 | 0.007647371 |
| 700.039989 | 673.817513  | 1.52071E-05 | 0.010645594 |
| 700.079989 | 901.36628   | 2.03426E-05 | 0.014241434 |
| 700.119989 | 1147.508695 | 2.58977E-05 | 0.018131478 |
| 700.159989 | 1424.681416 | 3.21531E-05 | 0.022512297 |

|            |             |             |             |
|------------|-------------|-------------|-------------|
| 700.199989 | 1656.709558 | 3.73896E-05 | 0.026180216 |
| 700.239989 | 1695.313639 | 3.82609E-05 | 0.026791789 |
| 700.279989 | 1544.403998 | 3.4855E-05  | 0.024408292 |
| 700.319989 | 1280.232843 | 2.88931E-05 | 0.020234396 |
| 700.359989 | 982.363557  | 2.21706E-05 | 0.015527385 |
| 700.399989 | 771.139759  | 1.74036E-05 | 0.012189446 |
| 700.439989 | 618.575728  | 1.39604E-05 | 0.009778417 |
| 700.479989 | 489.112674  | 1.10386E-05 | 0.007732313 |
| 700.519989 | 418.887946  | 9.45372E-06 | 0.006622518 |
| 700.559989 | 408.81574   | 9.2264E-06  | 0.006463648 |
| 700.599989 | 435.834416  | 9.83618E-06 | 0.006891225 |
| 700.639989 | 490.378009  | 1.10671E-05 | 0.007754087 |
| 700.679989 | 504.792085  | 1.13925E-05 | 0.007982465 |
| 700.719989 | 459.43871   | 1.03689E-05 | 0.00726569  |
| 700.759989 | 436.319173  | 9.84712E-06 | 0.006900465 |
| 700.799989 | 429.222816  | 9.68696E-06 | 0.006788622 |
| 700.839989 | 397.731783  | 8.97625E-06 | 0.006290917 |
| 700.879989 | 372.007112  | 8.39568E-06 | 0.005884366 |
| 700.919989 | 378.403353  | 8.54004E-06 | 0.005985882 |
| 700.959989 | 502.81539   | 1.13478E-05 | 0.007954384 |
| 700.999989 | 741.845367  | 1.67424E-05 | 0.011736434 |
| 701.039989 | 1003.171723 | 2.26402E-05 | 0.015871677 |
| 701.079989 | 1378.863842 | 3.1119E-05  | 0.021816934 |
| 701.119989 | 1802.407959 | 4.06778E-05 | 0.028520045 |
| 701.159989 | 2067.638695 | 4.66637E-05 | 0.032718737 |
| 701.199989 | 2157.166205 | 4.86842E-05 | 0.034137386 |
| 701.239989 | 2117.698044 | 4.77935E-05 | 0.03351471  |
| 701.279989 | 1935.913952 | 4.36909E-05 | 0.030639541 |
| 701.319989 | 1642.378575 | 3.70662E-05 | 0.025995265 |
| 701.359989 | 1315.662799 | 2.96927E-05 | 0.020825255 |
| 701.399989 | 1032.350497 | 2.32987E-05 | 0.016341717 |
| 701.439989 | 783.088964  | 1.76732E-05 | 0.012396708 |
| 701.479989 | 563.766532  | 1.27234E-05 | 0.008925228 |
| 701.519989 | 407.714049  | 9.20154E-06 | 0.006455063 |
| 701.559989 | 370.998251  | 8.37291E-06 | 0.005874101 |
| 701.599989 | 392.008871  | 8.84709E-06 | 0.006207121 |
| 701.639989 | 393.451675  | 8.87966E-06 | 0.006230322 |
| 701.679989 | 397.272285  | 8.96588E-06 | 0.00629118  |
| 701.719989 | 412.816555  | 9.31669E-06 | 0.006537711 |
| 701.759989 | 385.174763  | 8.69286E-06 | 0.0061003   |
| 701.799989 | 362.695168  | 8.18552E-06 | 0.005744601 |
| 701.839989 | 341.902369  | 7.71626E-06 | 0.00541558  |
| 701.879989 | 296.115227  | 6.68291E-06 | 0.0046906   |
| 701.919989 | 308.992581  | 6.97353E-06 | 0.004894862 |
| 701.959989 | 379.576028  | 8.5665E-06  | 0.006013342 |
| 701.999989 | 518.554114  | 1.1703E-05  | 0.008215537 |

|            |             |             |             |
|------------|-------------|-------------|-------------|
| 702.039989 | 711.000494  | 1.60463E-05 | 0.011265138 |
| 702.079989 | 950.021759  | 2.14407E-05 | 0.015053064 |
| 702.119989 | 1236.402093 | 2.79039E-05 | 0.019591867 |
| 702.159989 | 1457.745651 | 3.28993E-05 | 0.023100564 |
| 702.199989 | 1548.168483 | 3.494E-05   | 0.024534872 |
| 702.239989 | 1521.785172 | 3.43446E-05 | 0.024118132 |
| 702.279989 | 1370.294665 | 3.09256E-05 | 0.021718459 |
| 702.319989 | 1135.911432 | 2.56359E-05 | 0.018004632 |
| 702.359989 | 899.367394  | 2.02975E-05 | 0.01425613  |
| 702.399989 | 689.687111  | 1.55653E-05 | 0.010933051 |
| 702.439989 | 513.251002  | 1.15834E-05 | 0.008136615 |
| 702.479989 | 392.055939  | 8.84816E-06 | 0.006215653 |
| 702.519989 | 342.035037  | 7.71925E-06 | 0.00542293  |
| 702.559989 | 320.781973  | 7.2396E-06  | 0.005086255 |
| 702.599989 | 347.680976  | 7.84668E-06 | 0.005513074 |
| 702.639989 | 381.350489  | 8.60655E-06 | 0.006047306 |
| 702.679989 | 420.073208  | 9.48047E-06 | 0.006661735 |
| 702.719989 | 444.730865  | 1.0037E-05  | 0.00705317  |
| 702.759989 | 435.043986  | 9.81834E-06 | 0.006899934 |
| 702.799989 | 400.353043  | 9.03541E-06 | 0.006350086 |
| 702.839989 | 350.17851   | 7.90304E-06 | 0.005554573 |
| 702.879989 | 337.647811  | 7.62024E-06 | 0.005356115 |
| 702.919989 | 371.097496  | 8.37515E-06 | 0.005887063 |
| 702.959989 | 473.168401  | 1.06788E-05 | 0.007506735 |
| 702.999989 | 671.354545  | 1.51515E-05 | 0.01065153  |
| 703.039989 | 997.936421  | 2.2522E-05  | 0.015833891 |
| 703.079989 | 1369.020724 | 3.08969E-05 | 0.021722986 |
| 703.119989 | 1706.259757 | 3.85079E-05 | 0.027075679 |
| 703.159989 | 1954.321859 | 4.41063E-05 | 0.031013801 |
| 703.199989 | 2085.753714 | 4.70726E-05 | 0.033101421 |
| 703.239989 | 2082.559189 | 4.70005E-05 | 0.033052603 |
| 703.279989 | 1876.501863 | 4.235E-05   | 0.029783931 |
| 703.319989 | 1548.47883  | 3.4947E-05  | 0.024578931 |
| 703.359989 | 1173.802096 | 2.64911E-05 | 0.018632765 |
| 703.399989 | 835.869519  | 1.88644E-05 | 0.013269226 |
| 703.439989 | 588.561558  | 1.3283E-05  | 0.009343804 |
| 703.479989 | 442.426452  | 9.98495E-06 | 0.007024212 |
| 703.519989 | 374.52082   | 8.45241E-06 | 0.005946442 |
| 703.559989 | 365.195494  | 8.24195E-06 | 0.005798709 |
| 703.599989 | 368.486047  | 8.31622E-06 | 0.00585129  |
| 703.639989 | 379.006769  | 8.55365E-06 | 0.006018694 |
| 703.679989 | 367.606535  | 8.29637E-06 | 0.005837988 |
| 703.719989 | 353.945316  | 7.98805E-06 | 0.005621352 |
| 703.759989 | 366.826444  | 8.27876E-06 | 0.005826261 |
| 703.799989 | 353.158965  | 7.97031E-06 | 0.005609501 |
| 703.839989 | 313.19228   | 7.06831E-06 | 0.004974962 |

|            |             |             |             |
|------------|-------------|-------------|-------------|
| 703.879989 | 299.037451  | 6.74886E-06 | 0.004750387 |
| 703.919989 | 299.478536  | 6.75881E-06 | 0.004757664 |
| 703.959989 | 331.796049  | 7.48817E-06 | 0.005271375 |
| 703.999989 | 457.59322   | 1.03272E-05 | 0.007270378 |
| 704.039989 | 693.24501   | 1.56456E-05 | 0.01101511  |
| 704.079989 | 994.155157  | 2.24367E-05 | 0.015797229 |
| 704.119989 | 1307.289584 | 2.95037E-05 | 0.020774148 |
| 704.159989 | 1549.403807 | 3.49679E-05 | 0.024622986 |
| 704.199989 | 1600.015036 | 3.61101E-05 | 0.02542874  |
| 704.239989 | 1549.598758 | 3.49723E-05 | 0.024628882 |
| 704.279989 | 1411.626647 | 3.18584E-05 | 0.022437267 |
| 704.319989 | 1195.163669 | 2.69732E-05 | 0.018997749 |
| 704.359989 | 928.479167  | 2.09545E-05 | 0.014759498 |
| 704.399989 | 698.005588  | 1.5753E-05  | 0.011096423 |
| 704.439989 | 513.204002  | 1.15823E-05 | 0.008159035 |
| 704.479989 | 376.712318  | 8.50187E-06 | 0.005989399 |
| 704.519989 | 324.026528  | 7.31283E-06 | 0.005152033 |
| 704.559989 | 315.214832  | 7.11396E-06 | 0.005012211 |
| 704.599989 | 350.033542  | 7.89977E-06 | 0.005566177 |
| 704.639989 | 395.837376  | 8.9335E-06  | 0.0062949   |
| 704.679989 | 412.197675  | 9.30273E-06 | 0.006555446 |
| 704.719989 | 420.292388  | 9.48541E-06 | 0.006684561 |
| 704.759989 | 431.162197  | 9.73073E-06 | 0.006857829 |
| 704.799989 | 425.848314  | 9.6108E-06  | 0.006773694 |
| 704.839989 | 397.854569  | 8.97902E-06 | 0.006328775 |
| 704.879989 | 390.333807  | 8.80929E-06 | 0.006209492 |
| 704.919989 | 438.121458  | 9.88779E-06 | 0.006970102 |
| 704.959989 | 578.084073  | 1.30466E-05 | 0.009197297 |
| 704.999989 | 867.247772  | 1.95726E-05 | 0.013798665 |
| 705.039989 | 1339.019302 | 3.02198E-05 | 0.021306168 |
| 705.079989 | 1959.056407 | 4.42132E-05 | 0.031173824 |
| 705.119989 | 2685.292191 | 6.06033E-05 | 0.042732601 |
| 705.159989 | 3316.285782 | 7.4844E-05  | 0.05277696  |
| 705.199989 | 3464.472966 | 7.81883E-05 | 0.055138409 |
| 705.239989 | 3127.577281 | 7.05851E-05 | 0.049779409 |
| 705.279989 | 2596.69397  | 5.86038E-05 | 0.041332063 |
| 705.319989 | 2010.919792 | 4.53837E-05 | 0.032010002 |
| 705.359989 | 1465.721539 | 3.30793E-05 | 0.02333281  |
| 705.399989 | 1009.910082 | 2.27923E-05 | 0.016077663 |
| 705.439989 | 701.932834  | 1.58416E-05 | 0.011175331 |
| 705.479989 | 519.799466  | 1.17311E-05 | 0.008276092 |
| 705.519989 | 434.562256  | 9.80746E-06 | 0.006919362 |
| 705.559989 | 403.412369  | 9.10446E-06 | 0.006423739 |
| 705.599989 | 415.777575  | 9.38352E-06 | 0.006621012 |
| 705.639989 | 421.164412  | 9.50509E-06 | 0.006707175 |
| 705.679989 | 435.830606  | 9.83609E-06 | 0.006941132 |

|            |             |             |             |
|------------|-------------|-------------|-------------|
| 705.719989 | 436.011196  | 9.84017E-06 | 0.006944401 |
| 705.759989 | 389.978852  | 8.80128E-06 | 0.006211591 |
| 705.799989 | 336.263692  | 7.589E-06   | 0.005356318 |
| 705.839989 | 314.533011  | 7.09857E-06 | 0.005010456 |
| 705.879989 | 309.951408  | 6.99517E-06 | 0.004937752 |
| 705.919989 | 345.128875  | 7.78908E-06 | 0.005498466 |
| 705.959989 | 407.142589  | 9.18864E-06 | 0.006486813 |
| 705.999989 | 550.225699  | 1.24178E-05 | 0.008766986 |
| 706.039989 | 821.279199  | 1.85351E-05 | 0.013086541 |
| 706.079989 | 1169.305284 | 2.63896E-05 | 0.018633163 |
| 706.119989 | 1522.709044 | 3.43654E-05 | 0.024266112 |
| 706.159989 | 1781.631423 | 4.02089E-05 | 0.028393944 |
| 706.199989 | 1842.274943 | 4.15776E-05 | 0.029362086 |
| 706.239989 | 1726.340289 | 3.89611E-05 | 0.027515884 |
| 706.279989 | 1544.038445 | 3.48468E-05 | 0.024611595 |
| 706.319989 | 1257.444319 | 2.83788E-05 | 0.02004449  |
| 706.359989 | 953.014881  | 2.15082E-05 | 0.015192545 |
| 706.399989 | 700.130435  | 1.5801E-05  | 0.011161804 |
| 706.439989 | 528.802996  | 1.19343E-05 | 0.0084309   |
| 706.479989 | 430.107376  | 9.70692E-06 | 0.006857748 |
| 706.519989 | 374.981949  | 8.46282E-06 | 0.005979152 |
| 706.559989 | 352.815096  | 7.96255E-06 | 0.005626016 |
| 706.599989 | 379.827745  | 8.57218E-06 | 0.006057105 |
| 706.639989 | 422.838071  | 9.54287E-06 | 0.006743371 |
| 706.679989 | 447.520784  | 1.00999E-05 | 0.007137412 |
| 706.719989 | 428.464647  | 9.66985E-06 | 0.006833876 |
| 706.759989 | 393.418415  | 8.87891E-06 | 0.006275255 |
| 706.799989 | 366.994609  | 8.28256E-06 | 0.005854111 |
| 706.839989 | 333.702588  | 7.5312E-06  | 0.005323355 |
| 706.879989 | 342.277485  | 7.72473E-06 | 0.005460454 |
| 706.919989 | 409.961379  | 9.25226E-06 | 0.006540606 |
| 706.959989 | 545.481019  | 1.23107E-05 | 0.008703205 |
| 706.999989 | 754.600463  | 1.70303E-05 | 0.012040409 |
| 707.039989 | 1048.599236 | 2.36654E-05 | 0.016732401 |
| 707.079989 | 1508.311983 | 3.40405E-05 | 0.024069357 |
| 707.119989 | 2047.032997 | 4.61987E-05 | 0.032668013 |
| 707.159989 | 2476.443855 | 5.58899E-05 | 0.039523093 |
| 707.199989 | 2581.888138 | 5.82696E-05 | 0.041208274 |
| 707.239989 | 2393.664765 | 5.40217E-05 | 0.038206292 |
| 707.279989 | 2052.138903 | 4.63139E-05 | 0.032756906 |
| 707.319989 | 1639.066448 | 3.69914E-05 | 0.02616479  |
| 707.359989 | 1239.932551 | 2.79836E-05 | 0.019794444 |
| 707.399989 | 914.602212  | 2.06413E-05 | 0.014601654 |
| 707.439989 | 652.704649  | 1.47306E-05 | 0.01042104  |
| 707.479989 | 480.828166  | 1.08516E-05 | 0.007677305 |
| 707.519989 | 401.969632  | 9.07189E-06 | 0.006418547 |



|            |             |             |             |
|------------|-------------|-------------|-------------|
| 707.559989 | 372.911445  | 8.41609E-06 | 0.00595489  |
| 707.599989 | 361.16027   | 8.15088E-06 | 0.005767566 |
| 707.639989 | 383.105971  | 8.64617E-06 | 0.006118374 |
| 707.679989 | 419.18614   | 9.46045E-06 | 0.006694969 |
| 707.719989 | 419.483898  | 9.46717E-06 | 0.006700104 |
| 707.759989 | 398.279191  | 8.98861E-06 | 0.006361776 |
| 707.799989 | 358.370209  | 8.08792E-06 | 0.005724627 |
| 707.839989 | 322.261104  | 7.27298E-06 | 0.005148109 |
| 707.879989 | 291.722398  | 6.58377E-06 | 0.004660518 |
| 707.919989 | 314.342039  | 7.09426E-06 | 0.00502217  |
| 707.959989 | 388.675021  | 8.77185E-06 | 0.006210122 |
| 707.999989 | 498.789328  | 1.1257E-05  | 0.007969942 |
| 708.039989 | 692.697447  | 1.56332E-05 | 0.011068942 |
| 708.079989 | 946.714284  | 2.1366E-05  | 0.015128853 |
| 708.119989 | 1263.800305 | 2.85222E-05 | 0.020197149 |
| 708.159989 | 1587.399389 | 3.58254E-05 | 0.02537011  |
| 708.199989 | 1718.978728 | 3.8795E-05  | 0.027474587 |
| 708.239989 | 1668.126353 | 3.76473E-05 | 0.026663315 |
| 708.279989 | 1452.642421 | 3.27841E-05 | 0.023220333 |
| 708.319989 | 1160.725715 | 2.6196E-05  | 0.018555124 |
| 708.359989 | 915.635646  | 2.06646E-05 | 0.014637991 |
| 708.399989 | 711.404161  | 1.60554E-05 | 0.011373646 |
| 708.439989 | 569.171411  | 1.28454E-05 | 0.009100199 |
| 708.479989 | 463.77514   | 1.04668E-05 | 0.007415489 |
| 708.519989 | 374.911773  | 8.46124E-06 | 0.005994955 |
| 708.559989 | 341.57808   | 7.70894E-06 | 0.005462247 |
| 708.599989 | 338.906298  | 7.64864E-06 | 0.005419828 |
| 708.639989 | 366.958975  | 8.28175E-06 | 0.005868781 |
| 708.679989 | 416.927141  | 9.40946E-06 | 0.006668299 |
| 708.719989 | 452.063121  | 1.02024E-05 | 0.00723067  |
| 708.759989 | 440.233552  | 9.93546E-06 | 0.007041855 |
| 708.799989 | 409.660251  | 9.24546E-06 | 0.006553183 |
| 708.839989 | 367.336915  | 8.29028E-06 | 0.005876484 |
| 708.879989 | 332.179075  | 7.49682E-06 | 0.005314345 |
| 708.919989 | 353.520904  | 7.97847E-06 | 0.0056561   |
| 708.959989 | 427.056289  | 9.63807E-06 | 0.006833003 |
| 708.999989 | 605.964343  | 1.36758E-05 | 0.009696122 |
| 709.039989 | 971.419669  | 2.19236E-05 | 0.015544701 |
| 709.079989 | 1447.494354 | 3.26679E-05 | 0.023164176 |
| 709.119989 | 1890.107703 | 4.26571E-05 | 0.030249001 |
| 709.159989 | 2282.282649 | 5.15079E-05 | 0.03652737  |
| 709.199989 | 2496.061819 | 5.63326E-05 | 0.039951107 |
| 709.239989 | 2463.939445 | 5.56077E-05 | 0.039439191 |
| 709.279989 | 2228.314238 | 5.02899E-05 | 0.035669654 |
| 709.319989 | 1808.863017 | 4.08235E-05 | 0.028956938 |
| 709.359989 | 1348.74275  | 3.04392E-05 | 0.021592383 |

|            |             |             |             |
|------------|-------------|-------------|-------------|
| 709.399989 | 956.834808  | 2.15944E-05 | 0.015319088 |
| 709.439989 | 656.725742  | 1.48214E-05 | 0.010514883 |
| 709.479989 | 460.121771  | 1.03843E-05 | 0.007367458 |
| 709.519989 | 357.11451   | 8.05958E-06 | 0.005718431 |
| 709.559989 | 330.671908  | 7.4628E-06  | 0.005295307 |
| 709.599989 | 353.129812  | 7.96965E-06 | 0.005655262 |
| 709.639989 | 409.008317  | 9.23075E-06 | 0.006550508 |
| 709.679989 | 452.369004  | 1.02093E-05 | 0.007245363 |
| 709.719989 | 419.426009  | 9.46586E-06 | 0.006718111 |
| 709.759989 | 369.006545  | 8.32796E-06 | 0.005910855 |
| 709.799989 | 328.824087  | 7.4211E-06  | 0.005267498 |
| 709.839989 | 286.631526  | 6.46887E-06 | 0.004591866 |
| 709.879989 | 278.549802  | 6.28648E-06 | 0.004462647 |
| 709.919989 | 307.727247  | 6.94498E-06 | 0.004930377 |
| 709.959989 | 389.411904  | 8.78848E-06 | 0.006239472 |
| 709.999989 | 496.140376  | 1.11972E-05 | 0.00795001  |
| 710.039989 | 661.30107   | 1.49246E-05 | 0.010597094 |
| 710.079989 | 923.588211  | 2.08441E-05 | 0.014800978 |
| 710.119989 | 1265.944747 | 2.85706E-05 | 0.020288561 |
| 710.159989 | 1548.711195 | 3.49523E-05 | 0.024821693 |
| 710.199989 | 1654.98813  | 3.73508E-05 | 0.026526521 |
| 710.239989 | 1654.226547 | 3.73336E-05 | 0.026515808 |
| 710.279989 | 1550.094708 | 3.49835E-05 | 0.024848065 |
| 710.319989 | 1340.528233 | 3.02539E-05 | 0.021489918 |
| 710.359989 | 1073.39484  | 2.4225E-05  | 0.01720849  |
| 710.399989 | 818.398349  | 1.84701E-05 | 0.013121167 |
| 710.439989 | 590.02803   | 1.33161E-05 | 0.009460298 |
| 710.479989 | 420.054686  | 9.48005E-06 | 0.006735385 |
| 710.519989 | 357.504856  | 8.06839E-06 | 0.00573275  |
| 710.559989 | 348.118295  | 7.85655E-06 | 0.005582547 |
| 710.599989 | 370.276617  | 8.35663E-06 | 0.005938219 |
| 710.639989 | 411.4584    | 9.28604E-06 | 0.006599033 |
| 710.679989 | 449.537765  | 1.01454E-05 | 0.007210162 |
| 710.719989 | 473.527962  | 1.06869E-05 | 0.00759537  |
| 710.759989 | 472.176657  | 1.06564E-05 | 0.007574121 |
| 710.799989 | 427.153165  | 9.64025E-06 | 0.006852291 |
| 710.839989 | 388.626761  | 8.77076E-06 | 0.00623461  |
| 710.879989 | 375.826377  | 8.48188E-06 | 0.006029597 |
| 710.919989 | 411.089974  | 9.27773E-06 | 0.006595722 |
| 710.959989 | 522.752258  | 1.17978E-05 | 0.008387757 |
| 710.999989 | 669.764606  | 1.51157E-05 | 0.01074723  |
| 711.039989 | 961.581901  | 2.17016E-05 | 0.01543068  |
| 711.079989 | 1328.434733 | 2.99809E-05 | 0.021318833 |
| 711.119989 | 1748.46392  | 3.94604E-05 | 0.028061076 |
| 711.159989 | 2162.527719 | 4.88052E-05 | 0.034708333 |
| 711.199989 | 2388.496604 | 5.3905E-05  | 0.038337265 |

|            |             |             |             |
|------------|-------------|-------------|-------------|
| 711.239989 | 2351.245108 | 5.30643E-05 | 0.037741471 |
| 711.279989 | 2075.215723 | 4.68347E-05 | 0.033312605 |
| 711.319989 | 1659.480262 | 3.74522E-05 | 0.026640469 |
| 711.359989 | 1226.687063 | 2.76846E-05 | 0.01969373  |
| 711.399989 | 875.792035  | 1.97654E-05 | 0.01406111  |
| 711.439989 | 641.576481  | 1.44795E-05 | 0.010301286 |
| 711.479989 | 481.093665  | 1.08576E-05 | 0.007724975 |
| 711.519989 | 374.502837  | 8.45201E-06 | 0.006013772 |
| 711.559989 | 321.243954  | 7.25003E-06 | 0.00515883  |
| 711.599989 | 319.609317  | 7.21314E-06 | 0.005132868 |
| 711.639989 | 371.763325  | 8.39018E-06 | 0.005970788 |
| 711.679989 | 417.935209  | 9.43222E-06 | 0.006712719 |
| 711.719989 | 409.676635  | 9.24583E-06 | 0.006580443 |
| 711.759989 | 416.312688  | 9.3956E-06  | 0.00668741  |
| 711.799989 | 398.93521   | 9.00341E-06 | 0.006408629 |
| 711.839989 | 328.962832  | 7.42423E-06 | 0.005284866 |
| 711.879989 | 290.382775  | 6.55353E-06 | 0.00466533  |
| 711.919989 | 287.054215  | 6.47841E-06 | 0.004612112 |
| 711.959989 | 343.099424  | 7.74328E-06 | 0.005512903 |
| 711.999989 | 469.638505  | 1.05991E-05 | 0.00754655  |
| 712.039989 | 635.681616  | 1.43464E-05 | 0.010215245 |
| 712.079989 | 891.332886  | 2.01161E-05 | 0.014324302 |
| 712.119989 | 1239.850479 | 2.79817E-05 | 0.019926327 |
| 712.159989 | 1451.072649 | 3.27487E-05 | 0.023322306 |
| 712.199989 | 1540.262563 | 3.47616E-05 | 0.024757197 |
| 712.239989 | 1579.565214 | 3.56486E-05 | 0.025390349 |
| 712.279989 | 1466.986715 | 3.31078E-05 | 0.023582057 |
| 712.319989 | 1235.21303  | 2.7877E-05  | 0.019857371 |
| 712.359989 | 999.683147  | 2.25615E-05 | 0.016071879 |
| 712.399989 | 795.82171   | 1.79606E-05 | 0.012795122 |
| 712.439989 | 610.277269  | 1.37731E-05 | 0.009812513 |
| 712.479989 | 454.675024  | 1.02614E-05 | 0.007311029 |
| 712.519989 | 365.097229  | 8.23974E-06 | 0.005870977 |
| 712.559989 | 335.199236  | 7.56498E-06 | 0.005390502 |
| 712.599989 | 356.395974  | 8.04336E-06 | 0.005731699 |
| 712.639989 | 414.976211  | 9.36544E-06 | 0.006674184 |
| 712.679989 | 454.817515  | 1.02646E-05 | 0.007315373 |
| 712.719989 | 459.920335  | 1.03798E-05 | 0.007397863 |
| 712.759989 | 431.513545  | 9.73866E-06 | 0.006941327 |
| 712.799989 | 411.387609  | 9.28445E-06 | 0.006617953 |
| 712.839989 | 401.956519  | 9.0716E-06  | 0.006466598 |
| 712.879989 | 414.91989   | 9.36416E-06 | 0.006675525 |
| 712.919989 | 422.640122  | 9.5384E-06  | 0.006800115 |
| 712.959989 | 472.190637  | 1.06567E-05 | 0.00759779  |
| 712.999989 | 619.55306   | 1.39824E-05 | 0.009969486 |
| 713.039989 | 884.050919  | 1.99518E-05 | 0.01422643  |

|            |             |             |             |
|------------|-------------|-------------|-------------|
| 713.079989 | 1233.861592 | 2.78465E-05 | 0.019856809 |
| 713.119989 | 1574.208046 | 3.55277E-05 | 0.025335501 |
| 713.159989 | 1859.574447 | 4.1968E-05  | 0.029929902 |
| 713.199989 | 2014.769996 | 4.54706E-05 | 0.032429598 |
| 713.239989 | 2024.55363  | 4.56914E-05 | 0.032588902 |
| 713.279989 | 1843.609611 | 4.16077E-05 | 0.029677941 |
| 713.319989 | 1528.957774 | 3.45064E-05 | 0.024614139 |
| 713.359989 | 1181.974034 | 2.66755E-05 | 0.01902924  |
| 713.399989 | 875.571761  | 1.97604E-05 | 0.014097094 |
| 713.439989 | 650.859365  | 1.4689E-05  | 0.010479712 |
| 713.479989 | 477.199466  | 1.07697E-05 | 0.007683985 |
| 713.519989 | 364.747067  | 8.23183E-06 | 0.005873578 |
| 713.559989 | 335.015892  | 7.56084E-06 | 0.005395114 |
| 713.599989 | 334.724757  | 7.55427E-06 | 0.005390728 |
| 713.639989 | 354.847556  | 8.00842E-06 | 0.005715125 |
| 713.679989 | 375.583461  | 8.4764E-06  | 0.006049434 |
| 713.719989 | 387.930773  | 8.75506E-06 | 0.006248659 |
| 713.759989 | 379.67091   | 8.56864E-06 | 0.006115955 |
| 713.799989 | 365.548989  | 8.24993E-06 | 0.005888801 |
| 713.839989 | 351.599393  | 7.93511E-06 | 0.005664398 |
| 713.879989 | 297.305161  | 6.70976E-06 | 0.004789966 |
| 713.919989 | 282.109458  | 6.36682E-06 | 0.004545398 |
| 713.959989 | 319.444394  | 7.20942E-06 | 0.005147234 |
| 713.999989 | 446.254035  | 1.00713E-05 | 0.007190931 |
| 714.039989 | 664.822438  | 1.50041E-05 | 0.010713539 |
| 714.079989 | 934.368479  | 2.10874E-05 | 0.015058087 |
| 714.119989 | 1190.297727 | 2.68634E-05 | 0.019183664 |
| 714.159989 | 1444.848005 | 3.26082E-05 | 0.023287477 |
| 714.199989 | 1623.300069 | 3.66356E-05 | 0.02616516  |
| 714.239989 | 1611.49339  | 3.63692E-05 | 0.025976309 |
| 714.279989 | 1479.843202 | 3.3398E-05  | 0.023855523 |
| 714.319989 | 1270.762214 | 2.86793E-05 | 0.020486221 |
| 714.359989 | 1025.8988   | 2.31531E-05 | 0.016539653 |
| 714.399989 | 816.699087  | 1.84318E-05 | 0.01316765  |
| 714.439989 | 615.485463  | 1.38906E-05 | 0.009924036 |
| 714.479989 | 441.656723  | 9.96758E-06 | 0.007121634 |
| 714.519988 | 363.717273  | 8.20859E-06 | 0.005865203 |
| 714.559988 | 369.678035  | 8.34312E-06 | 0.005961659 |
| 714.599988 | 408.578594  | 9.22105E-06 | 0.006589362 |
| 714.639988 | 452.596542  | 1.02145E-05 | 0.007299671 |
| 714.679988 | 471.076209  | 1.06315E-05 | 0.007598145 |
| 714.719988 | 477.320033  | 1.07724E-05 | 0.007699284 |
| 714.759988 | 452.829608  | 1.02197E-05 | 0.007304657 |
| 714.799988 | 427.97277   | 9.65875E-06 | 0.006904074 |
| 714.839988 | 410.210742  | 9.25789E-06 | 0.006617906 |
| 714.879988 | 404.661716  | 9.13265E-06 | 0.00652875  |

|            |             |             |             |
|------------|-------------|-------------|-------------|
| 714.919988 | 464.489238  | 1.04829E-05 | 0.007494417 |
| 714.959988 | 535.018754  | 1.20746E-05 | 0.008632876 |
| 714.999988 | 731.044633  | 1.64987E-05 | 0.011796541 |
| 715.039988 | 1060.950093 | 2.39442E-05 | 0.017121036 |
| 715.079988 | 1458.534035 | 3.29171E-05 | 0.023538346 |
| 715.119988 | 1863.598746 | 4.20588E-05 | 0.030077109 |
| 715.159988 | 2185.48948  | 4.93235E-05 | 0.03527416  |
| 715.199988 | 2294.555289 | 5.17849E-05 | 0.037036572 |
| 715.239988 | 2234.038092 | 5.04191E-05 | 0.036061776 |
| 715.279988 | 2073.177066 | 4.67887E-05 | 0.033467034 |
| 715.319988 | 1751.255774 | 3.95234E-05 | 0.028271881 |
| 715.359988 | 1362.296435 | 3.07451E-05 | 0.021993838 |
| 715.399988 | 1005.498432 | 2.26927E-05 | 0.016234357 |
| 715.439988 | 713.632863  | 1.61057E-05 | 0.011522662 |
| 715.479988 | 512.043042  | 1.15561E-05 | 0.008268157 |
| 715.519988 | 390.176829  | 8.80575E-06 | 0.006300688 |
| 715.559988 | 338.521138  | 7.63995E-06 | 0.005466843 |
| 715.599988 | 326.268757  | 7.36343E-06 | 0.005269271 |
| 715.639988 | 350.928695  | 7.91997E-06 | 0.005667849 |
| 715.679988 | 360.901522  | 8.14504E-06 | 0.005829245 |
| 715.719988 | 350.717748  | 7.91521E-06 | 0.005665075 |
| 715.759988 | 324.266195  | 7.31824E-06 | 0.005238101 |
| 715.799988 | 327.500263  | 7.39122E-06 | 0.005290639 |
| 715.839988 | 306.487685  | 6.917E-06   | 0.004951465 |
| 715.879988 | 282.675147  | 6.37958E-06 | 0.004567017 |
| 715.919988 | 287.194906  | 6.48159E-06 | 0.004640299 |
| 715.959988 | 324.818314  | 7.3307E-06  | 0.005248486 |
| 715.999988 | 424.741805  | 9.58583E-06 | 0.006863455 |
| 716.039988 | 610.304066  | 1.37737E-05 | 0.009862529 |
| 716.079988 | 893.505064  | 2.01652E-05 | 0.014439871 |
| 716.119988 | 1229.165945 | 2.77406E-05 | 0.019865572 |
| 716.159988 | 1477.758513 | 3.3351E-05  | 0.023884617 |
| 716.199988 | 1618.043977 | 3.6517E-05  | 0.026153474 |
| 716.239988 | 1612.470766 | 3.63912E-05 | 0.026064846 |
| 716.279988 | 1454.400485 | 3.28238E-05 | 0.023511026 |
| 716.319988 | 1199.327914 | 2.70672E-05 | 0.019388748 |
| 716.359988 | 908.046289  | 2.04933E-05 | 0.014680609 |
| 716.399988 | 697.71686   | 1.57465E-05 | 0.011280791 |
| 716.439988 | 554.736192  | 1.25196E-05 | 0.008969559 |
| 716.479988 | 418.374686  | 9.44213E-06 | 0.0067651   |
| 716.519988 | 349.310755  | 7.88346E-06 | 0.005648655 |
| 716.559988 | 373.53876   | 8.43025E-06 | 0.006040779 |
| 716.599988 | 416.610685  | 9.40232E-06 | 0.006737704 |
| 716.639988 | 417.474855  | 9.42183E-06 | 0.006752057 |
| 716.679988 | 412.443308  | 9.30827E-06 | 0.006671052 |
| 716.719988 | 407.493577  | 9.19656E-06 | 0.00659136  |

|            |             |             |             |
|------------|-------------|-------------|-------------|
| 716.759988 | 402.677027  | 9.08786E-06 | 0.006513814 |
| 716.799988 | 370.232131  | 8.35562E-06 | 0.005989311 |
| 716.839988 | 316.03365   | 7.13244E-06 | 0.005112818 |
| 716.879988 | 318.28531   | 7.18326E-06 | 0.005149533 |
| 716.919988 | 386.770933  | 8.72888E-06 | 0.006257909 |
| 716.959988 | 490.276422  | 1.10649E-05 | 0.007933059 |
| 716.999988 | 638.761466  | 1.4416E-05  | 0.010336241 |
| 717.039988 | 901.5921    | 2.03477E-05 | 0.014590099 |
| 717.079988 | 1271.716612 | 2.87009E-05 | 0.020580821 |
| 717.119988 | 1680.951716 | 3.79367E-05 | 0.027205194 |
| 717.159988 | 2039.907194 | 4.60379E-05 | 0.033016514 |
| 717.199988 | 2118.150254 | 4.78037E-05 | 0.034284814 |
| 717.239988 | 2006.495578 | 4.52838E-05 | 0.03247936  |
| 717.279988 | 1865.236592 | 4.20958E-05 | 0.030194469 |
| 717.319988 | 1660.148777 | 3.74672E-05 | 0.026876004 |
| 717.359988 | 1338.968602 | 3.02187E-05 | 0.021677655 |
| 717.399988 | 1026.299524 | 2.31622E-05 | 0.016616527 |
| 717.439988 | 739.41104   | 1.66875E-05 | 0.011972263 |
| 717.479988 | 514.43185   | 1.161E-05   | 0.00832995  |
| 717.519988 | 399.748806  | 9.02177E-06 | 0.006473303 |
| 717.559988 | 375.808336  | 8.48147E-06 | 0.006085964 |
| 717.599988 | 368.765246  | 8.32252E-06 | 0.005972239 |
| 717.639988 | 386.039651  | 8.71238E-06 | 0.00625235  |
| 717.679988 | 418.689507  | 9.44924E-06 | 0.00678153  |
| 717.719988 | 431.446936  | 9.73716E-06 | 0.006988552 |
| 717.759988 | 404.957159  | 9.13932E-06 | 0.006559838 |
| 717.799988 | 384.153255  | 8.6698E-06  | 0.006223185 |
| 717.839988 | 363.373076  | 8.20082E-06 | 0.00588688  |
| 717.879988 | 300.984258  | 6.7928E-06  | 0.004876412 |
| 717.919988 | 284.628989  | 6.42368E-06 | 0.004611688 |
| 717.959988 | 325.573091  | 7.34773E-06 | 0.005275377 |
| 717.999988 | 407.771924  | 9.20284E-06 | 0.006607642 |
| 718.039988 | 582.971524  | 1.31569E-05 | 0.009447148 |
| 718.079988 | 817.573735  | 1.84515E-05 | 0.013249653 |
| 718.119988 | 1092.339372 | 2.46526E-05 | 0.017703509 |
| 718.159988 | 1321.788215 | 2.98309E-05 | 0.021423372 |
| 718.199988 | 1442.481095 | 3.25548E-05 | 0.023380849 |
| 718.239988 | 1460.070874 | 3.29518E-05 | 0.023667276 |
| 718.279988 | 1407.497213 | 3.17653E-05 | 0.022816345 |
| 718.319988 | 1298.735435 | 2.93106E-05 | 0.021054426 |
| 718.359988 | 1123.801768 | 2.53626E-05 | 0.018219506 |
| 718.399988 | 864.437446  | 1.95091E-05 | 0.014015372 |
| 718.439988 | 598.411707  | 1.35053E-05 | 0.009702761 |
| 718.479988 | 413.828816  | 9.33954E-06 | 0.006710273 |
| 718.519988 | 327.954916  | 7.40149E-06 | 0.005318115 |
| 718.559988 | 324.7784    | 7.3298E-06  | 0.005266898 |

|            |             |             |             |
|------------|-------------|-------------|-------------|
| 718.599988 | 366.523838  | 8.27193E-06 | 0.005944211 |
| 718.639988 | 406.110336  | 9.16534E-06 | 0.006586583 |
| 718.679988 | 424.693145  | 9.58473E-06 | 0.006888356 |
| 718.719988 | 425.914754  | 9.6123E-06  | 0.006908554 |
| 718.759988 | 422.220206  | 9.52892E-06 | 0.006849008 |
| 718.799988 | 402.617645  | 9.08652E-06 | 0.00653139  |
| 718.839988 | 371.33087   | 8.38042E-06 | 0.006024181 |
| 718.879988 | 342.446677  | 7.72854E-06 | 0.005555896 |
| 718.919988 | 368.918035  | 8.32597E-06 | 0.005985704 |
| 718.959988 | 471.891597  | 1.06499E-05 | 0.007656878 |
| 718.999988 | 637.201003  | 1.43807E-05 | 0.010339751 |
| 719.039988 | 970.725606  | 2.19079E-05 | 0.015752674 |
| 719.079988 | 1385.173609 | 3.12614E-05 | 0.022479475 |
| 719.119988 | 1812.227249 | 4.08994E-05 | 0.029411608 |
| 719.159988 | 2118.353637 | 4.78083E-05 | 0.03438181  |
| 719.199988 | 2203.780948 | 4.97363E-05 | 0.035770322 |
| 719.239988 | 2112.061089 | 4.76663E-05 | 0.034283492 |
| 719.279988 | 1858.072194 | 4.19341E-05 | 0.03016236  |
| 719.319988 | 1523.224199 | 3.4377E-05  | 0.024728098 |
| 719.359988 | 1180.771313 | 2.66484E-05 | 0.019169767 |
| 719.399988 | 849.014237  | 1.91611E-05 | 0.013784473 |
| 719.439988 | 579.705673  | 1.30831E-05 | 0.009412541 |
| 719.479988 | 429.375408  | 9.6904E-06  | 0.006972052 |
| 719.519988 | 361.35861   | 8.15536E-06 | 0.005867945 |
| 719.559988 | 342.155504  | 7.72197E-06 | 0.005556423 |
| 719.599988 | 360.400674  | 8.13374E-06 | 0.00585304  |
| 719.639988 | 381.117962  | 8.6013E-06  | 0.006189841 |
| 719.679988 | 390.126266  | 8.80461E-06 | 0.006336499 |
| 719.719988 | 390.310304  | 8.80876E-06 | 0.006339841 |
| 719.759988 | 362.366984  | 8.17812E-06 | 0.005886282 |
| 719.799988 | 333.749421  | 7.53226E-06 | 0.00542172  |
| 719.839988 | 329.40835   | 7.43429E-06 | 0.005351498 |
| 719.879988 | 322.655819  | 7.28189E-06 | 0.005242089 |
| 719.919988 | 296.950434  | 6.70176E-06 | 0.004824729 |
| 719.959988 | 306.547158  | 6.91834E-06 | 0.00498093  |
| 719.999988 | 396.068148  | 8.93871E-06 | 0.006435869 |
| 720.039988 | 564.417491  | 1.27381E-05 | 0.009171953 |
| 720.079988 | 826.668655  | 1.86568E-05 | 0.01343436  |
| 720.119988 | 1156.132615 | 2.60923E-05 | 0.018789589 |
| 720.159988 | 1378.83946  | 3.11185E-05 | 0.022410289 |
| 720.199988 | 1433.584628 | 3.2354E-05  | 0.023301356 |
| 720.239988 | 1390.113471 | 3.13729E-05 | 0.022596035 |
| 720.279988 | 1315.74429  | 2.96945E-05 | 0.021388366 |
| 720.319988 | 1138.660402 | 2.5698E-05  | 0.018510768 |
| 720.359988 | 885.050461  | 1.99744E-05 | 0.014388727 |
| 720.399988 | 692.14084   | 1.56207E-05 | 0.011253119 |

|            |             |             |             |
|------------|-------------|-------------|-------------|
| 720.439988 | 510.838075  | 1.15289E-05 | 0.008305883 |
| 720.479988 | 385.980059  | 8.71103E-06 | 0.006276124 |
| 720.519988 | 327.609005  | 7.39368E-06 | 0.005327293 |
| 720.559988 | 319.8171    | 7.21783E-06 | 0.005200877 |
| 720.599988 | 374.128878  | 8.44357E-06 | 0.006084435 |
| 720.639988 | 423.883912  | 9.56647E-06 | 0.00689398  |
| 720.679988 | 461.772633  | 1.04216E-05 | 0.007510613 |
| 720.719988 | 460.032052  | 1.03823E-05 | 0.007482719 |
| 720.759988 | 432.743112  | 9.76641E-06 | 0.007039237 |
| 720.799988 | 404.336004  | 9.1253E-06  | 0.006577516 |
| 720.839988 | 377.53288   | 8.52039E-06 | 0.006141839 |
| 720.879988 | 392.128513  | 8.84979E-06 | 0.00637964  |
| 720.919988 | 440.77485   | 9.94767E-06 | 0.007171477 |
| 720.959988 | 513.445293  | 1.15877E-05 | 0.008354301 |
| 720.999988 | 673.846957  | 1.52078E-05 | 0.010964814 |
| 721.039988 | 1022.374238 | 2.30736E-05 | 0.016636961 |
| 721.079988 | 1500.337441 | 3.38605E-05 | 0.024416148 |
| 721.119988 | 1963.613139 | 4.4316E-05  | 0.031957163 |
| 721.159988 | 2305.527292 | 5.20325E-05 | 0.037523786 |
| 721.199988 | 2363.975208 | 5.33516E-05 | 0.038477193 |
| 721.239988 | 2161.987546 | 4.8793E-05  | 0.035191497 |
| 721.279988 | 1875.655415 | 4.23309E-05 | 0.030532453 |
| 721.319988 | 1549.632008 | 3.4973E-05  | 0.02522675  |
| 721.359988 | 1173.217438 | 2.64779E-05 | 0.019100086 |
| 721.399988 | 822.551019  | 1.85638E-05 | 0.013391947 |
| 721.439988 | 567.005016  | 1.27965E-05 | 0.009231917 |
| 721.479988 | 414.094552  | 9.34554E-06 | 0.006742618 |
| 721.519988 | 335.193199  | 7.56484E-06 | 0.005458186 |
| 721.559988 | 336.670414  | 7.59818E-06 | 0.005482544 |
| 721.599988 | 379.465859  | 8.56402E-06 | 0.006179794 |
| 721.639988 | 403.665996  | 9.11018E-06 | 0.00657427  |
| 721.679988 | 411.545962  | 9.28802E-06 | 0.006702978 |
| 721.719988 | 391.823364  | 8.84291E-06 | 0.006382103 |
| 721.759988 | 362.224357  | 8.1749E-06  | 0.005900315 |
| 721.799988 | 336.663848  | 7.59803E-06 | 0.005484261 |
| 721.839988 | 290.55798   | 6.55749E-06 | 0.004733458 |
| 721.879988 | 276.497261  | 6.24016E-06 | 0.004504645 |
| 721.919988 | 304.604657  | 6.8745E-06  | 0.004962841 |
| 721.959988 | 355.124662  | 8.01467E-06 | 0.00578627  |
| 721.999988 | 510.404987  | 1.15191E-05 | 0.008316811 |
| 722.039988 | 759.203068  | 1.71342E-05 | 0.012371546 |
| 722.079988 | 1053.755433 | 2.37818E-05 | 0.017172356 |
| 722.119988 | 1343.406886 | 3.03188E-05 | 0.021893828 |
| 722.159988 | 1599.320899 | 3.60944E-05 | 0.026065964 |
| 722.199988 | 1663.412228 | 3.75409E-05 | 0.027112035 |
| 722.239988 | 1527.316001 | 3.44694E-05 | 0.024895175 |



|            |             |             |             |
|------------|-------------|-------------|-------------|
| 722.279988 | 1300.133384 | 2.93422E-05 | 0.021193284 |
| 722.319988 | 1063.862902 | 2.40099E-05 | 0.017342833 |
| 722.359988 | 845.785584  | 1.90882E-05 | 0.013788554 |
| 722.399988 | 650.887847  | 1.46896E-05 | 0.01061179  |
| 722.439988 | 475.108931  | 1.07225E-05 | 0.007746397 |
| 722.479988 | 361.160697  | 8.15089E-06 | 0.005888858 |
| 722.519988 | 322.781492  | 7.28473E-06 | 0.005263362 |
| 722.559988 | 326.057975  | 7.35867E-06 | 0.005317084 |
| 722.599988 | 351.889885  | 7.94166E-06 | 0.005738647 |
| 722.639988 | 359.254359  | 8.10787E-06 | 0.005859071 |
| 722.679988 | 371.924312  | 8.39381E-06 | 0.006066041 |
| 722.719988 | 409.11162   | 9.23308E-06 | 0.006672931 |
| 722.759988 | 403.791013  | 9.113E-06   | 0.006586512 |
| 722.799988 | 388.939606  | 8.77783E-06 | 0.006344612 |
| 722.839988 | 395.556554  | 8.92716E-06 | 0.006452909 |
| 722.879988 | 396.219024  | 8.94211E-06 | 0.006464073 |
| 722.919988 | 413.942675  | 9.34211E-06 | 0.006753598 |
| 722.959988 | 508.031296  | 1.14656E-05 | 0.00828914  |
| 722.999988 | 716.038232  | 1.616E-05   | 0.011683669 |
| 723.039988 | 1079.197841 | 2.4356E-05  | 0.017610356 |
| 723.079988 | 1527.573186 | 3.44752E-05 | 0.024928327 |
| 723.119988 | 1952.972438 | 4.40759E-05 | 0.031872141 |
| 723.159988 | 2297.965337 | 5.18619E-05 | 0.037504434 |
| 723.199988 | 2400.413075 | 5.4174E-05  | 0.039178621 |
| 723.239988 | 2270.975001 | 5.12527E-05 | 0.037068033 |
| 723.279988 | 1958.867232 | 4.42089E-05 | 0.031975416 |
| 723.319988 | 1545.44798  | 3.48786E-05 | 0.025228395 |
| 723.359988 | 1176.426884 | 2.65503E-05 | 0.019205436 |
| 723.399988 | 852.853478  | 1.92477E-05 | 0.013923797 |
| 723.439988 | 577.498705  | 1.30333E-05 | 0.00942884  |
| 723.479988 | 394.013948  | 8.89235E-06 | 0.006433434 |
| 723.519988 | 318.07578   | 7.17853E-06 | 0.005193808 |
| 723.559988 | 330.986829  | 7.46991E-06 | 0.005404929 |
| 723.599988 | 368.88683   | 8.32526E-06 | 0.006024159 |
| 723.639988 | 388.026161  | 8.75721E-06 | 0.006337067 |
| 723.679988 | 399.130916  | 9.00783E-06 | 0.006518785 |
| 723.719988 | 387.433103  | 8.74383E-06 | 0.006328081 |
| 723.759988 | 366.87374   | 8.27983E-06 | 0.005992609 |
| 723.799988 | 342.130757  | 7.72141E-06 | 0.00558876  |
| 723.839988 | 307.284995  | 6.93499E-06 | 0.005019826 |
| 723.879988 | 295.719193  | 6.67397E-06 | 0.004831154 |
| 723.919988 | 320.922316  | 7.24277E-06 | 0.005243186 |
| 723.959988 | 389.626958  | 8.79334E-06 | 0.006366025 |
| 723.999988 | 512.8824    | 1.1575E-05  | 0.00838033  |
| 724.039988 | 690.122954  | 1.55751E-05 | 0.011277005 |
| 724.079988 | 901.830247  | 2.03531E-05 | 0.014737238 |

|            |             |             |             |
|------------|-------------|-------------|-------------|
| 724.119988 | 1154.757553 | 2.60613E-05 | 0.018871486 |
| 724.159988 | 1374.210948 | 3.1014E-05  | 0.022459117 |
| 724.199988 | 1454.549099 | 3.28271E-05 | 0.02377342  |
| 724.239988 | 1432.206353 | 3.23229E-05 | 0.023409539 |
| 724.279988 | 1329.469581 | 3.00043E-05 | 0.021731497 |
| 724.319988 | 1164.199177 | 2.62744E-05 | 0.01903104  |
| 724.359988 | 950.047141  | 2.14412E-05 | 0.015531177 |
| 724.399988 | 717.431689  | 1.61914E-05 | 0.011729075 |
| 724.439988 | 522.290232  | 1.17874E-05 | 0.008539237 |
| 724.479988 | 401.601592  | 9.06359E-06 | 0.006566389 |
| 724.519988 | 334.533507  | 7.54996E-06 | 0.005470094 |
| 724.559988 | 324.725661  | 7.32861E-06 | 0.005310015 |
| 724.599988 | 358.720084  | 8.09581E-06 | 0.005866226 |
| 724.639988 | 405.585339  | 9.1535E-06  | 0.006632989 |
| 724.679988 | 425.750173  | 9.60859E-06 | 0.006963152 |
| 724.719988 | 423.139666  | 9.54967E-06 | 0.006920839 |
| 724.759988 | 405.479975  | 9.15112E-06 | 0.006632364 |
| 724.799988 | 370.393317  | 8.35926E-06 | 0.006058792 |
| 724.839988 | 346.042316  | 7.80969E-06 | 0.005660778 |
| 724.879988 | 340.418551  | 7.68277E-06 | 0.005569088 |
| 724.919988 | 370.672569  | 8.36556E-06 | 0.006064364 |
| 724.959988 | 464.87603   | 1.04916E-05 | 0.007605993 |
| 724.999988 | 639.971282  | 1.44433E-05 | 0.010471364 |
| 725.039988 | 919.81759   | 2.0759E-05  | 0.015051106 |
| 725.079988 | 1280.359822 | 2.88959E-05 | 0.020951866 |
| 725.119988 | 1690.051256 | 3.81421E-05 | 0.027657601 |
| 725.159988 | 2012.076692 | 4.54098E-05 | 0.032929347 |
| 725.199988 | 2108.912523 | 4.75952E-05 | 0.034516052 |
| 725.239988 | 1934.931155 | 4.36687E-05 | 0.031670288 |
| 725.279988 | 1687.879016 | 3.80931E-05 | 0.027628147 |
| 725.319988 | 1417.876997 | 3.19995E-05 | 0.023209883 |
| 725.359988 | 1078.654197 | 2.43437E-05 | 0.017657962 |
| 725.399988 | 787.404145  | 1.77706E-05 | 0.012890804 |
| 725.439988 | 561.024579  | 1.26615E-05 | 0.00918519  |
| 725.479988 | 405.066844  | 9.14179E-06 | 0.006632189 |
| 725.519988 | 348.678924  | 7.8692E-06  | 0.00570926  |
| 725.559988 | 364.132749  | 8.21797E-06 | 0.005962629 |
| 725.599988 | 394.925655  | 8.91292E-06 | 0.006467216 |
| 725.639988 | 409.919843  | 9.25132E-06 | 0.006713128 |
| 725.679988 | 435.44144   | 9.82731E-06 | 0.00713148  |
| 725.719988 | 405.327354  | 9.14767E-06 | 0.00663865  |
| 725.759988 | 376.468577  | 8.49637E-06 | 0.006166326 |
| 725.799988 | 346.683741  | 7.82417E-06 | 0.005678782 |
| 725.839988 | 306.982997  | 6.92818E-06 | 0.005028749 |
| 725.879988 | 267.218289  | 6.03074E-06 | 0.004377597 |
| 725.919988 | 268.211198  | 6.05315E-06 | 0.004394105 |

|            |             |             |             |
|------------|-------------|-------------|-------------|
| 725.959988 | 320.386297  | 7.23067E-06 | 0.005249179 |
| 725.999988 | 413.693526  | 9.33649E-06 | 0.006778289 |
| 726.039988 | 576.317315  | 1.30067E-05 | 0.009443369 |
| 726.079988 | 827.861814  | 1.86837E-05 | 0.013565852 |
| 726.119988 | 1101.561153 | 2.48607E-05 | 0.018051852 |
| 726.159988 | 1301.580248 | 2.93749E-05 | 0.021330843 |
| 726.199988 | 1380.838302 | 3.11636E-05 | 0.022631004 |
| 726.239988 | 1356.672632 | 3.06182E-05 | 0.02223617  |
| 726.279988 | 1244.993789 | 2.80978E-05 | 0.020406852 |
| 726.319988 | 1077.030159 | 2.43071E-05 | 0.017654711 |
| 726.359988 | 885.796468  | 1.99912E-05 | 0.014520802 |
| 726.399988 | 678.258145  | 1.53073E-05 | 0.011119253 |
| 726.439988 | 503.09489   | 1.13542E-05 | 0.008248109 |
| 726.479988 | 372.415037  | 8.40489E-06 | 0.006105983 |
| 726.519988 | 310.146031  | 6.99956E-06 | 0.005085323 |
| 726.559988 | 311.164764  | 7.02256E-06 | 0.005102308 |
| 726.599988 | 353.183288  | 7.97085E-06 | 0.005791623 |
| 726.639988 | 404.737079  | 9.13435E-06 | 0.006637386 |
| 726.679988 | 426.670722  | 9.62936E-06 | 0.006997466 |
| 726.719988 | 413.002492  | 9.32089E-06 | 0.006773678 |
| 726.759988 | 430.303495  | 9.71135E-06 | 0.007057821 |
| 726.799988 | 430.021558  | 9.70499E-06 | 0.007053585 |
| 726.839988 | 384.751757  | 8.68331E-06 | 0.006311378 |
| 726.879988 | 348.080165  | 7.85568E-06 | 0.00571014  |
| 726.919988 | 381.130474  | 8.60158E-06 | 0.006252663 |
| 726.959988 | 452.655845  | 1.02158E-05 | 0.007426487 |
| 726.999988 | 569.81087   | 1.28598E-05 | 0.009349102 |
| 727.039988 | 791.448187  | 1.78619E-05 | 0.012986303 |
| 727.079988 | 1138.464039 | 2.56935E-05 | 0.018681264 |
| 727.119988 | 1582.182137 | 3.57076E-05 | 0.025963744 |
| 727.159988 | 1989.657246 | 4.49038E-05 | 0.032652241 |
| 727.199988 | 2130.658846 | 4.8086E-05  | 0.03496814  |
| 727.239988 | 2044.325163 | 4.61376E-05 | 0.033553087 |
| 727.279988 | 1786.057301 | 4.03088E-05 | 0.029315802 |
| 727.319988 | 1399.072826 | 3.15751E-05 | 0.022965219 |
| 727.359988 | 1029.860499 | 2.32425E-05 | 0.016905677 |
| 727.399988 | 753.796995  | 1.70121E-05 | 0.012374636 |
| 727.439988 | 561.119386  | 1.26637E-05 | 0.009212069 |
| 727.479988 | 429.714939  | 9.69807E-06 | 0.00705515  |
| 727.519988 | 361.557649  | 8.15985E-06 | 0.005936456 |
| 727.559988 | 340.109841  | 7.67581E-06 | 0.005584609 |
| 727.599988 | 364.951083  | 8.23644E-06 | 0.005992832 |
| 727.639988 | 401.428081  | 9.05967E-06 | 0.00659218  |
| 727.679988 | 433.097125  | 9.7744E-06  | 0.007112634 |
| 727.719988 | 418.447472  | 9.44378E-06 | 0.006872425 |
| 727.759988 | 380.107215  | 8.57849E-06 | 0.006243082 |

|            |             |             |             |
|------------|-------------|-------------|-------------|
| 727.799988 | 327.820285  | 7.39845E-06 | 0.00538459  |
| 727.839988 | 296.610153  | 6.69408E-06 | 0.004872218 |
| 727.879988 | 291.537847  | 6.5796E-06  | 0.004789161 |
| 727.919988 | 309.945076  | 6.99503E-06 | 0.005091821 |
| 727.959988 | 360.780268  | 8.14231E-06 | 0.005927275 |
| 727.999988 | 445.275367  | 1.00492E-05 | 0.00731585  |
| 728.039988 | 601.712047  | 1.35798E-05 | 0.009886639 |
| 728.079988 | 839.506458  | 1.89465E-05 | 0.013794561 |
| 728.119988 | 1076.125765 | 2.42867E-05 | 0.017683602 |
| 728.159988 | 1304.982462 | 2.94516E-05 | 0.021445503 |
| 728.199988 | 1396.550175 | 3.15182E-05 | 0.022951547 |
| 728.239988 | 1379.419911 | 3.11316E-05 | 0.022671266 |
| 728.279988 | 1251.962084 | 2.8255E-05  | 0.02057758  |
| 728.319988 | 1064.364515 | 2.40212E-05 | 0.017495138 |
| 728.359988 | 871.757221  | 1.96743E-05 | 0.014330007 |
| 728.399988 | 665.590269  | 1.50214E-05 | 0.010941621 |
| 728.439988 | 487.170873  | 1.09948E-05 | 0.008009029 |
| 728.479988 | 378.794131  | 8.54886E-06 | 0.00622767  |
| 728.519988 | 342.791894  | 7.73634E-06 | 0.005636075 |
| 728.559988 | 374.971483  | 8.46258E-06 | 0.0061655   |
| 728.599988 | 395.050586  | 8.91574E-06 | 0.006496009 |
| 728.639988 | 380.726592  | 8.59247E-06 | 0.006260816 |
| 728.679988 | 398.896578  | 9.00254E-06 | 0.006559971 |
| 728.719988 | 454.567141  | 1.02589E-05 | 0.0074759   |
| 728.759988 | 433.132936  | 9.77521E-06 | 0.00712378  |
| 728.799988 | 402.667098  | 9.08764E-06 | 0.006623069 |
| 728.839988 | 382.12513   | 8.62403E-06 | 0.006285539 |
| 728.879988 | 365.101068  | 8.23982E-06 | 0.006005842 |
| 728.919988 | 406.570051  | 9.17572E-06 | 0.006688366 |
| 728.959988 | 554.499675  | 1.25143E-05 | 0.009122413 |
| 728.999988 | 798.42448   | 1.80193E-05 | 0.01313609  |
| 729.039988 | 1121.16556  | 2.53031E-05 | 0.018447005 |
| 729.079988 | 1506.553142 | 3.40008E-05 | 0.024789307 |
| 729.119988 | 1863.803539 | 4.20634E-05 | 0.030669302 |
| 729.159988 | 2082.313895 | 4.69949E-05 | 0.034266818 |
| 729.199988 | 2180.059139 | 4.92009E-05 | 0.035877294 |
| 729.239988 | 2141.83795  | 4.83383E-05 | 0.035250221 |
| 729.279988 | 1857.394043 | 4.19188E-05 | 0.030570539 |
| 729.319988 | 1503.557034 | 3.39332E-05 | 0.024748152 |
| 729.359988 | 1177.905437 | 2.65837E-05 | 0.019389076 |
| 729.399988 | 883.251864  | 1.99338E-05 | 0.014539687 |
| 729.439988 | 613.327885  | 1.3842E-05  | 0.010096876 |
| 729.479988 | 407.747044  | 9.20228E-06 | 0.006712881 |
| 729.519988 | 303.662001  | 6.85323E-06 | 0.004999567 |
| 729.559988 | 301.278846  | 6.79944E-06 | 0.004960602 |
| 729.599988 | 336.404072  | 7.59217E-06 | 0.005539248 |

|            |             |             |             |
|------------|-------------|-------------|-------------|
| 729.639988 | 395.257013  | 8.9204E-06  | 0.006508681 |
| 729.679988 | 455.311631  | 1.02757E-05 | 0.007498009 |
| 729.719988 | 456.739916  | 1.0308E-05  | 0.007521942 |
| 729.759988 | 414.945991  | 9.36475E-06 | 0.006834022 |
| 729.799988 | 380.507613  | 8.58753E-06 | 0.006267177 |
| 729.839988 | 354.56544   | 8.00205E-06 | 0.005840215 |
| 729.879988 | 317.179258  | 7.15829E-06 | 0.005224696 |
| 729.919988 | 334.964693  | 7.55969E-06 | 0.005517966 |
| 729.959988 | 415.662525  | 9.38092E-06 | 0.006847699 |
| 729.999988 | 502.439147  | 1.13394E-05 | 0.008277727 |
| 730.039988 | 688.934228  | 1.55483E-05 | 0.01135087  |
| 730.079988 | 944.224228  | 2.13098E-05 | 0.015557877 |
| 730.119988 | 1218.507466 | 2.75E-05    | 0.020078312 |
| 730.159988 | 1480.687211 | 3.3417E-05  | 0.024399791 |
| 730.199988 | 1556.902362 | 3.51371E-05 | 0.025657123 |
| 730.239988 | 1501.490552 | 3.38866E-05 | 0.024745314 |
| 730.279988 | 1361.908243 | 3.07364E-05 | 0.022446157 |
| 730.319988 | 1170.585377 | 2.64185E-05 | 0.019293945 |
| 730.359988 | 922.324566  | 2.08156E-05 | 0.015202867 |
| 730.399988 | 688.328227  | 1.55346E-05 | 0.011346478 |
| 730.439988 | 487.388066  | 1.09997E-05 | 0.008034599 |
| 730.479988 | 341.162542  | 7.69956E-06 | 0.005624377 |
| 730.519988 | 265.232173  | 5.98592E-06 | 0.004372835 |
| 730.559988 | 263.155742  | 5.93906E-06 | 0.004338839 |
| 730.599988 | 313.192174  | 7.06831E-06 | 0.005164108 |
| 730.639988 | 385.681441  | 8.70429E-06 | 0.006359704 |
| 730.679988 | 463.522123  | 1.0461E-05  | 0.007643679 |
| 730.719988 | 495.785205  | 1.11892E-05 | 0.008176159 |
| 730.759988 | 453.79031   | 1.02414E-05 | 0.007484016 |
| 730.799988 | 381.390147  | 8.60744E-06 | 0.00629032  |
| 730.839988 | 335.96645   | 7.58229E-06 | 0.005541444 |
| 730.879988 | 346.446682  | 7.81882E-06 | 0.005714618 |
| 730.919988 | 373.734259  | 8.43466E-06 | 0.006165063 |
| 730.959988 | 457.87318   | 1.03336E-05 | 0.007553419 |
| 730.999988 | 686.634437  | 1.54964E-05 | 0.011327856 |
| 731.039988 | 1054.784563 | 2.3805E-05  | 0.01740242  |
| 731.079988 | 1444.240316 | 3.25945E-05 | 0.023829181 |
| 731.119988 | 1760.934474 | 3.97418E-05 | 0.029056052 |
| 731.159988 | 1998.553248 | 4.51046E-05 | 0.032978652 |
| 731.199988 | 2090.063725 | 4.71698E-05 | 0.034490577 |
| 731.239988 | 1991.985627 | 4.49563E-05 | 0.032873874 |
| 731.279988 | 1773.029665 | 4.00148E-05 | 0.02926203  |
| 731.319988 | 1465.651273 | 3.30777E-05 | 0.024190389 |
| 731.359988 | 1153.899357 | 2.60419E-05 | 0.019046005 |
| 731.399988 | 898.055146  | 2.02679E-05 | 0.014823908 |
| 731.439988 | 659.144501  | 1.4876E-05  | 0.010880882 |

|            |             |             |             |
|------------|-------------|-------------|-------------|
| 731.479988 | 465.660124  | 1.05093E-05 | 0.007687343 |
| 731.519988 | 355.982218  | 8.03402E-06 | 0.005877048 |
| 731.559988 | 337.337338  | 7.61323E-06 | 0.005569537 |
| 731.599988 | 382.404072  | 8.63033E-06 | 0.006313947 |
| 731.639988 | 402.295916  | 9.07926E-06 | 0.006642749 |
| 731.679988 | 400.938196  | 9.04862E-06 | 0.006620692 |
| 731.719988 | 388.805297  | 8.77479E-06 | 0.006420692 |
| 731.759988 | 376.571716  | 8.4987E-06  | 0.006219008 |
| 731.799988 | 357.047861  | 8.05807E-06 | 0.005896898 |
| 731.839988 | 313.148272  | 7.06732E-06 | 0.005172148 |
| 731.879988 | 296.933164  | 6.70137E-06 | 0.004904597 |
| 731.919988 | 331.770766  | 7.4876E-06  | 0.005480327 |
| 731.959988 | 412.385273  | 9.30696E-06 | 0.006812323 |
| 731.999988 | 526.236918  | 1.18764E-05 | 0.00869355  |
| 732.039988 | 691.666352  | 1.56099E-05 | 0.011427105 |
| 732.079988 | 914.193791  | 2.06321E-05 | 0.015104333 |
| 732.119988 | 1192.847327 | 2.69209E-05 | 0.019709331 |
| 732.159988 | 1413.384535 | 3.18981E-05 | 0.023354527 |
| 732.199988 | 1470.439945 | 3.31858E-05 | 0.024298629 |
| 732.239988 | 1390.331078 | 3.13778E-05 | 0.022976106 |
| 732.279988 | 1241.182922 | 2.80118E-05 | 0.020512458 |
| 732.319988 | 1092.172718 | 2.46488E-05 | 0.018050821 |
| 732.359988 | 930.595246  | 2.10022E-05 | 0.015381199 |
| 732.399988 | 723.879635  | 1.6337E-05  | 0.011965186 |
| 732.439988 | 547.295205  | 1.23517E-05 | 0.009046872 |
| 732.479988 | 423.495698  | 9.55771E-06 | 0.00700083  |
| 732.519988 | 359.387925  | 8.11088E-06 | 0.005941385 |
| 732.559988 | 352.686642  | 7.95965E-06 | 0.005830918 |
| 732.599988 | 376.145773  | 8.48909E-06 | 0.006219104 |
| 732.639988 | 400.94246   | 9.04871E-06 | 0.006629449 |
| 732.679988 | 437.920103  | 9.88325E-06 | 0.007241257 |
| 732.719988 | 451.313302  | 1.01855E-05 | 0.007463129 |
| 732.759988 | 415.399783  | 9.37499E-06 | 0.006869621 |
| 732.799988 | 397.033223  | 8.96049E-06 | 0.006566245 |
| 732.839988 | 383.277804  | 8.65005E-06 | 0.0063391   |
| 732.879988 | 381.634477  | 8.61296E-06 | 0.006312265 |
| 732.919988 | 408.580498  | 9.22109E-06 | 0.006758323 |
| 732.959988 | 516.65704   | 1.16602E-05 | 0.008546482 |
| 732.999988 | 756.835636  | 1.70807E-05 | 0.012520172 |
| 733.039988 | 1161.586507 | 2.62154E-05 | 0.019216929 |
| 733.079988 | 1644.673386 | 3.7118E-05  | 0.027210454 |
| 733.119988 | 2098.427254 | 4.73586E-05 | 0.034719522 |
| 733.159988 | 2394.852949 | 5.40485E-05 | 0.039626194 |
| 733.199988 | 2382.567447 | 5.37712E-05 | 0.039425064 |
| 733.239988 | 2163.19779  | 4.88204E-05 | 0.035797041 |
| 733.279988 | 1878.719841 | 4.24001E-05 | 0.031091137 |

|            |             |             |             |
|------------|-------------|-------------|-------------|
| 733.319988 | 1550.57836  | 3.49944E-05 | 0.025662088 |
| 733.359988 | 1188.056429 | 2.68128E-05 | 0.019663419 |
| 733.399988 | 857.788141  | 1.93591E-05 | 0.014197952 |
| 733.439988 | 597.170109  | 1.34773E-05 | 0.009884789 |
| 733.479988 | 421.100966  | 9.50366E-06 | 0.006970746 |
| 733.519988 | 329.098786  | 7.4273E-06  | 0.005448074 |
| 733.559988 | 326.982112  | 7.37953E-06 | 0.005413329 |
| 733.599988 | 379.218769  | 8.55844E-06 | 0.006278471 |
| 733.639988 | 428.257577  | 9.66518E-06 | 0.00709076  |
| 733.679988 | 434.423296  | 9.80433E-06 | 0.00719324  |
| 733.719988 | 402.836873  | 9.09147E-06 | 0.006670591 |
| 733.759988 | 358.053752  | 8.08077E-06 | 0.005929349 |
| 733.799988 | 331.045144  | 7.47123E-06 | 0.005482387 |
| 733.839988 | 311.536164  | 7.03094E-06 | 0.005159583 |
| 733.879988 | 323.279563  | 7.29597E-06 | 0.005354366 |
| 733.919988 | 354.102733  | 7.99161E-06 | 0.005865199 |
| 733.959988 | 398.486178  | 8.99328E-06 | 0.006600706 |
| 733.999988 | 504.786837  | 1.13923E-05 | 0.008361974 |
| 734.039988 | 700.17817   | 1.5802E-05  | 0.011599334 |
| 734.079988 | 975.291402  | 2.2011E-05  | 0.016157811 |
| 734.119988 | 1287.119073 | 2.90485E-05 | 0.021325073 |
| 734.159988 | 1504.587144 | 3.39564E-05 | 0.024929457 |
| 734.199988 | 1586.373814 | 3.58022E-05 | 0.02628601  |
| 734.239988 | 1539.173452 | 3.4737E-05  | 0.025505295 |
| 734.279988 | 1385.579173 | 3.12706E-05 | 0.02296137  |
| 734.319988 | 1145.740555 | 2.58578E-05 | 0.018987876 |
| 734.359988 | 867.469711  | 1.95776E-05 | 0.014376994 |
| 734.399988 | 665.860909  | 1.50276E-05 | 0.011036235 |
| 734.439988 | 508.819629  | 1.14834E-05 | 0.008433832 |
| 734.479988 | 384.880151  | 8.68621E-06 | 0.006379847 |
| 734.519988 | 337.373741  | 7.61406E-06 | 0.005592676 |
| 734.559988 | 343.663603  | 7.75601E-06 | 0.005697254 |
| 734.599988 | 377.932742  | 8.52942E-06 | 0.006265709 |
| 734.639988 | 414.121113  | 9.34614E-06 | 0.006866046 |
| 734.679988 | 413.690265  | 9.33641E-06 | 0.006859276 |
| 734.719988 | 395.369589  | 8.92294E-06 | 0.006555863 |
| 734.759988 | 407.113386  | 9.18798E-06 | 0.006750962 |
| 734.799988 | 451.34619   | 1.01863E-05 | 0.00748486  |
| 734.839988 | 515.658355  | 1.16377E-05 | 0.008551841 |
| 734.879988 | 569.040328  | 1.28424E-05 | 0.009437658 |
| 734.919988 | 586.543412  | 1.32375E-05 | 0.00972848  |
| 734.959988 | 642.322073  | 1.44963E-05 | 0.010654211 |
| 734.999988 | 821.651988  | 1.85435E-05 | 0.013629502 |
| 735.039988 | 1156.473201 | 2.61E-05    | 0.019184536 |
| 735.079988 | 1608.695217 | 3.6306E-05  | 0.026687822 |
| 735.119988 | 2048.654944 | 4.62353E-05 | 0.033988485 |

|            |             |             |             |
|------------|-------------|-------------|-------------|
| 735.159988 | 2268.603508 | 5.11992E-05 | 0.037639619 |
| 735.199988 | 2223.792206 | 5.01879E-05 | 0.036898138 |
| 735.239988 | 2065.57617  | 4.66172E-05 | 0.034274813 |
| 735.279988 | 1885.531032 | 4.25538E-05 | 0.031288964 |
| 735.319988 | 1619.878742 | 3.65584E-05 | 0.026882127 |
| 735.359988 | 1252.783291 | 2.82736E-05 | 0.020791255 |
| 735.399988 | 947.231137  | 2.13777E-05 | 0.015721151 |
| 735.439988 | 684.307161  | 1.54439E-05 | 0.011358032 |
| 735.479988 | 472.509055  | 1.06639E-05 | 0.007843064 |
| 735.519988 | 348.621131  | 7.86789E-06 | 0.005786993 |
| 735.559988 | 323.036235  | 7.29048E-06 | 0.005362584 |
| 735.599988 | 354.795141  | 8.00723E-06 | 0.00589012  |
| 735.639988 | 375.521292  | 8.47499E-06 | 0.006234543 |
| 735.679988 | 385.259761  | 8.69478E-06 | 0.006396573 |
| 735.719988 | 413.261474  | 9.32674E-06 | 0.006861866 |
| 735.759988 | 389.709239  | 8.79519E-06 | 0.006471152 |
| 735.799988 | 388.222213  | 8.76163E-06 | 0.006446811 |
| 735.839988 | 401.749062  | 9.06692E-06 | 0.0066718   |
| 735.879988 | 381.147904  | 8.60198E-06 | 0.006330023 |
| 735.919988 | 360.270705  | 8.13081E-06 | 0.005983624 |
| 735.959988 | 384.055035  | 8.66759E-06 | 0.006378997 |
| 735.999988 | 494.501414  | 1.11602E-05 | 0.008213913 |
| 736.039988 | 692.982321  | 1.56396E-05 | 0.011511405 |
| 736.079988 | 925.884388  | 2.08959E-05 | 0.015381069 |
| 736.119988 | 1196.949296 | 2.70135E-05 | 0.019885161 |
| 736.159988 | 1431.061201 | 3.22971E-05 | 0.023775802 |
| 736.199988 | 1552.223167 | 3.50315E-05 | 0.025790201 |
| 736.239988 | 1500.977199 | 3.3875E-05  | 0.024940104 |
| 736.279988 | 1346.651295 | 3.0392E-05  | 0.022377054 |
| 736.319988 | 1159.034558 | 2.61578E-05 | 0.019260508 |
| 736.359988 | 942.953622  | 2.12811E-05 | 0.015670587 |
| 736.399988 | 698.814623  | 1.57713E-05 | 0.011613965 |
| 736.439988 | 541.957253  | 1.22312E-05 | 0.00900756  |
| 736.479988 | 442.824915  | 9.99394E-06 | 0.007360338 |
| 736.519988 | 375.088082  | 8.46522E-06 | 0.0062348   |
| 736.559988 | 350.70607   | 7.91495E-06 | 0.005829834 |
| 736.599988 | 376.268978  | 8.49187E-06 | 0.006255109 |
| 736.639988 | 426.625196  | 9.62834E-06 | 0.007092618 |
| 736.679988 | 481.989678  | 1.08778E-05 | 0.008013484 |
| 736.719988 | 492.377644  | 1.11123E-05 | 0.008186637 |
| 736.759988 | 456.196874  | 1.02957E-05 | 0.00758548  |
| 736.799988 | 422.968729  | 9.54582E-06 | 0.007033356 |
| 736.839988 | 424.15145   | 9.57251E-06 | 0.007053406 |
| 736.879988 | 442.560819  | 9.98798E-06 | 0.007359944 |
| 736.919988 | 458.214823  | 1.03413E-05 | 0.007620689 |
| 736.959988 | 535.296214  | 1.20809E-05 | 0.008903133 |



|            |             |             |             |
|------------|-------------|-------------|-------------|
| 736.999988 | 731.074996  | 1.64993E-05 | 0.012160017 |
| 737.039988 | 1071.999865 | 2.41935E-05 | 0.017831609 |
| 737.079988 | 1510.80715  | 3.40968E-05 | 0.025132079 |
| 737.119988 | 1928.244097 | 4.35178E-05 | 0.032077828 |
| 737.159988 | 2214.70507  | 4.99828E-05 | 0.036845327 |
| 737.199988 | 2273.917255 | 5.13191E-05 | 0.037832473 |
| 737.239988 | 2105.873505 | 4.75266E-05 | 0.035038533 |
| 737.279988 | 1795.231696 | 4.05159E-05 | 0.029871547 |
| 737.319988 | 1454.04689  | 3.28158E-05 | 0.024195755 |
| 737.359988 | 1114.627488 | 2.51556E-05 | 0.018548725 |
| 737.399988 | 804.380257  | 1.81537E-05 | 0.013386569 |
| 737.439988 | 553.573106  | 1.24934E-05 | 0.009213114 |
| 737.479988 | 391.972072  | 8.84626E-06 | 0.006523942 |
| 737.519988 | 324.793255  | 7.33013E-06 | 0.005406118 |
| 737.559988 | 335.048315  | 7.56157E-06 | 0.005577114 |
| 737.599988 | 380.069641  | 8.57764E-06 | 0.006326869 |
| 737.639988 | 403.518375  | 9.10685E-06 | 0.006717575 |
| 737.679988 | 432.912356  | 9.77023E-06 | 0.007207302 |
| 737.719988 | 428.160931  | 9.663E-06   | 0.007128585 |
| 737.759988 | 391.778032  | 8.84188E-06 | 0.006523189 |
| 737.799988 | 354.376273  | 7.99778E-06 | 0.005900761 |
| 737.839988 | 333.46252   | 7.52578E-06 | 0.005552825 |
| 737.879988 | 333.353296  | 7.52332E-06 | 0.005551307 |
| 737.919988 | 342.563005  | 7.73117E-06 | 0.005704985 |
| 737.959988 | 360.88252   | 8.14462E-06 | 0.006010401 |
| 737.999988 | 433.031543  | 9.77292E-06 | 0.007212414 |
| 738.039988 | 620.13997   | 1.39957E-05 | 0.010329383 |
| 738.079988 | 885.259756  | 1.99791E-05 | 0.014746159 |
| 738.119988 | 1166.914423 | 2.63356E-05 | 0.019438857 |
| 738.159988 | 1400.372039 | 3.16044E-05 | 0.023329138 |
| 738.199988 | 1455.674563 | 3.28525E-05 | 0.02425175  |
| 738.239988 | 1387.510546 | 3.13142E-05 | 0.02311738  |
| 738.279988 | 1284.316202 | 2.89852E-05 | 0.021399214 |
| 738.319988 | 1095.051847 | 2.47138E-05 | 0.018246689 |
| 738.359988 | 851.950772  | 1.92273E-05 | 0.0141967   |
| 738.399988 | 613.928113  | 1.38555E-05 | 0.010230903 |
| 738.439988 | 461.913712  | 1.04247E-05 | 0.007698052 |
| 738.479988 | 368.77172   | 8.32266E-06 | 0.006146121 |
| 738.519988 | 315.575659  | 7.1221E-06  | 0.005259815 |
| 738.559988 | 312.866661  | 7.06096E-06 | 0.005214946 |
| 738.599988 | 377.157669  | 8.51192E-06 | 0.006286906 |
| 738.639988 | 465.947615  | 1.05158E-05 | 0.007767382 |
| 738.679988 | 506.382291  | 1.14283E-05 | 0.008441888 |
| 738.719988 | 470.946576  | 1.06286E-05 | 0.007851565 |
| 738.759988 | 401.14672   | 9.05332E-06 | 0.006688233 |
| 738.799988 | 340.07269   | 7.67497E-06 | 0.005670265 |

|            |             |             |             |
|------------|-------------|-------------|-------------|
| 738.839988 | 322.650782  | 7.28178E-06 | 0.005380069 |
| 738.879988 | 338.543724  | 7.64046E-06 | 0.005645383 |
| 738.919988 | 362.915765  | 8.1905E-06  | 0.006052127 |
| 738.959988 | 417.946851  | 9.43248E-06 | 0.006970224 |
| 738.999988 | 578.766527  | 1.3062E-05  | 0.009652784 |
| 739.039988 | 872.683275  | 1.96952E-05 | 0.014555574 |
| 739.079988 | 1278.180158 | 2.88467E-05 | 0.021320053 |
| 739.119988 | 1720.7717   | 3.88354E-05 | 0.028704035 |
| 739.159988 | 2019.43872  | 4.55759E-05 | 0.033687896 |
| 739.199988 | 2142.090865 | 4.8344E-05  | 0.035735889 |
| 739.239988 | 2066.189665 | 4.6631E-05  | 0.034471517 |
| 739.279988 | 1751.526109 | 3.95295E-05 | 0.029223372 |
| 739.319988 | 1354.807301 | 3.05761E-05 | 0.022605532 |
| 739.359988 | 1049.016568 | 2.36748E-05 | 0.017504231 |
| 739.399988 | 784.405701  | 1.77029E-05 | 0.013089557 |
| 739.439988 | 533.311487  | 1.20361E-05 | 0.008899972 |
| 739.479988 | 382.603906  | 8.63484E-06 | 0.006385289 |
| 739.519988 | 314.092517  | 7.08863E-06 | 0.005242184 |
| 739.559988 | 282.711524  | 6.38041E-06 | 0.004718692 |
| 739.599988 | 313.491902  | 7.07508E-06 | 0.005232726 |
| 739.639988 | 357.585047  | 8.0702E-06  | 0.00596904  |
| 739.679988 | 386.029076  | 8.71214E-06 | 0.006444195 |
| 739.719988 | 409.077157  | 9.2323E-06  | 0.006829318 |
| 739.759988 | 387.542343  | 8.74629E-06 | 0.006470156 |
| 739.799988 | 338.552078  | 7.64065E-06 | 0.005652552 |
| 739.839988 | 295.774092  | 6.67521E-06 | 0.004938587 |
| 739.879988 | 269.070179  | 6.07254E-06 | 0.00449295  |
| 739.919988 | 268.013004  | 6.04868E-06 | 0.004475539 |
| 739.959988 | 298.641189  | 6.73992E-06 | 0.004987268 |
| 739.999988 | 414.623612  | 9.35748E-06 | 0.006924533 |
| 740.039988 | 623.143275  | 1.40635E-05 | 0.010407534 |
| 740.079988 | 883.038112  | 1.99289E-05 | 0.01474901  |
| 740.119988 | 1143.356686 | 2.5804E-05  | 0.019098032 |
| 740.159988 | 1390.192013 | 3.13747E-05 | 0.023222296 |
| 740.199988 | 1495.735061 | 3.37567E-05 | 0.024986677 |
| 740.239988 | 1429.767781 | 3.22679E-05 | 0.023885966 |
| 740.279988 | 1300.239638 | 2.93446E-05 | 0.021723218 |
| 740.319988 | 1094.562918 | 2.47028E-05 | 0.018287947 |
| 740.359988 | 858.826238  | 1.93825E-05 | 0.014350036 |
| 740.399988 | 661.720577  | 1.49341E-05 | 0.011057216 |
| 740.439988 | 529.895442  | 1.1959E-05  | 0.008854923 |
| 740.479988 | 434.479197  | 9.80559E-06 | 0.007260843 |
| 740.519988 | 351.478913  | 7.93239E-06 | 0.005874093 |
| 740.559988 | 335.867265  | 7.58006E-06 | 0.005613486 |
| 740.599988 | 381.836162  | 8.61751E-06 | 0.006382128 |
| 740.639988 | 426.384028  | 9.62289E-06 | 0.0071271   |

|            |             |             |             |
|------------|-------------|-------------|-------------|
| 740.679988 | 460.797506  | 1.03996E-05 | 0.007702744 |
| 740.719988 | 468.037701  | 1.0563E-05  | 0.007824195 |
| 740.759988 | 435.983955  | 9.83955E-06 | 0.007288745 |
| 740.799988 | 411.89905   | 9.29599E-06 | 0.006886468 |
| 740.839988 | 379.510014  | 8.56501E-06 | 0.006345304 |
| 740.879988 | 358.347171  | 8.0874E-06  | 0.00599179  |
| 740.919988 | 385.317267  | 8.69607E-06 | 0.006443095 |
| 740.959988 | 464.964214  | 1.04936E-05 | 0.007775334 |
| 740.999988 | 605.365184  | 1.36622E-05 | 0.010123726 |
| 741.039988 | 818.106551  | 1.84635E-05 | 0.013682211 |
| 741.079988 | 1168.160529 | 2.63638E-05 | 0.019537652 |
| 741.119988 | 1583.55766  | 3.57387E-05 | 0.026486658 |
| 741.159988 | 1983.418243 | 4.4763E-05  | 0.033176535 |
| 741.199988 | 2196.561966 | 4.95733E-05 | 0.036743762 |
| 741.239988 | 2085.631995 | 4.70698E-05 | 0.034890025 |
| 741.279988 | 1743.86226  | 3.93565E-05 | 0.029174217 |
| 741.319988 | 1415.827653 | 3.19533E-05 | 0.023687589 |
| 741.359988 | 1083.807191 | 2.446E-05   | 0.018133679 |
| 741.399988 | 772.420308  | 1.74325E-05 | 0.012924419 |
| 741.439988 | 551.870693  | 1.2455E-05  | 0.0092346   |
| 741.479988 | 403.722744  | 9.11146E-06 | 0.006755965 |
| 741.519988 | 338.64532   | 7.64275E-06 | 0.005667254 |
| 741.559988 | 323.323757  | 7.29697E-06 | 0.005411139 |
| 741.599988 | 325.48832   | 7.34582E-06 | 0.005447659 |
| 741.639988 | 343.931153  | 7.76205E-06 | 0.005756644 |
| 741.679988 | 366.969066  | 8.28198E-06 | 0.006142579 |
| 741.719988 | 355.207183  | 8.01653E-06 | 0.005946022 |
| 741.759988 | 339.603072  | 7.66437E-06 | 0.005685122 |
| 741.799988 | 333.633429  | 7.52964E-06 | 0.005585488 |
| 741.839988 | 319.179686  | 7.20344E-06 | 0.005343801 |
| 741.879988 | 311.694142  | 7.0345E-06  | 0.005218757 |
| 741.919988 | 310.322645  | 7.00355E-06 | 0.005196074 |
| 741.959988 | 327.040659  | 7.38085E-06 | 0.005476297 |
| 741.999988 | 412.811508  | 9.31658E-06 | 0.006912903 |
| 742.039988 | 578.09612   | 1.30468E-05 | 0.009681265 |
| 742.079988 | 801.929937  | 1.80984E-05 | 0.013430491 |
| 742.119988 | 1046.523378 | 2.36186E-05 | 0.017527817 |
| 742.159988 | 1235.104694 | 2.78746E-05 | 0.020687407 |
| 742.199988 | 1361.71655  | 3.0732E-05  | 0.022809324 |
| 742.239988 | 1373.713594 | 3.10028E-05 | 0.02301152  |
| 742.279988 | 1287.257374 | 2.90516E-05 | 0.021564426 |
| 742.319988 | 1118.16596  | 2.52354E-05 | 0.018732778 |
| 742.359988 | 854.482725  | 1.92845E-05 | 0.01431603  |
| 742.399988 | 618.209487  | 1.39521E-05 | 0.010358059 |
| 742.439988 | 459.286531  | 1.03655E-05 | 0.00769573  |
| 742.479988 | 348.335579  | 7.86145E-06 | 0.005836968 |

|            |             |             |             |
|------------|-------------|-------------|-------------|
| 742.519988 | 298.731454  | 6.74195E-06 | 0.005006035 |
| 742.559988 | 310.864018  | 7.01577E-06 | 0.005209629 |
| 742.599988 | 364.634984  | 8.2293E-06  | 0.006111081 |
| 742.639988 | 404.077098  | 9.11946E-06 | 0.006772474 |
| 742.679988 | 447.373282  | 1.00966E-05 | 0.007498537 |
| 742.719988 | 487.940707  | 1.10121E-05 | 0.008178938 |
| 742.759988 | 456.518457  | 1.0303E-05  | 0.007652646 |
| 742.799988 | 404.159975  | 9.12133E-06 | 0.006775322 |
| 742.839988 | 360.779303  | 8.14229E-06 | 0.006048416 |
| 742.879988 | 344.603883  | 7.77723E-06 | 0.005777548 |
| 742.919988 | 382.467263  | 8.63175E-06 | 0.006412702 |
| 742.959988 | 482.077568  | 1.08798E-05 | 0.00808327  |
| 742.999988 | 636.186464  | 1.43578E-05 | 0.010667877 |
| 743.039988 | 832.588537  | 1.87904E-05 | 0.013961992 |
| 743.079988 | 1124.173266 | 2.5371E-05  | 0.018852701 |
| 743.119988 | 1463.036594 | 3.30187E-05 | 0.024536855 |
| 743.159988 | 1692.283433 | 3.81925E-05 | 0.028383123 |
| 743.199988 | 1789.464564 | 4.03857E-05 | 0.030014669 |
| 743.239988 | 1753.32612  | 3.95701E-05 | 0.029410102 |
| 743.279988 | 1580.89191  | 3.56785E-05 | 0.026519136 |
| 743.319988 | 1296.949708 | 2.92703E-05 | 0.021757235 |
| 743.359988 | 963.192196  | 2.17379E-05 | 0.01615909  |
| 743.399988 | 702.919106  | 1.58639E-05 | 0.011793227 |
| 743.439988 | 521.178541  | 1.17623E-05 | 0.008744545 |
| 743.479988 | 399.765892  | 9.02216E-06 | 0.006707795 |
| 743.519988 | 341.361187  | 7.70405E-06 | 0.005728113 |
| 743.559988 | 341.762874  | 7.71311E-06 | 0.005735161 |
| 743.599988 | 347.80842   | 7.84955E-06 | 0.005836926 |
| 743.639988 | 355.764324  | 8.02911E-06 | 0.005970764 |
| 743.679988 | 354.342597  | 7.99702E-06 | 0.005947223 |
| 743.719988 | 360.126714  | 8.12756E-06 | 0.006044628 |
| 743.759988 | 379.069167  | 8.55506E-06 | 0.006362914 |
| 743.799988 | 363.755092  | 8.20945E-06 | 0.006106186 |
| 743.839988 | 314.343408  | 7.09429E-06 | 0.005277019 |
| 743.879988 | 302.97196   | 6.83766E-06 | 0.005086395 |
| 743.919988 | 311.540816  | 7.03104E-06 | 0.005230533 |
| 743.959988 | 350.90284   | 7.91939E-06 | 0.005891708 |
| 743.999988 | 436.724854  | 9.85627E-06 | 0.007333066 |
| 744.039988 | 599.867254  | 1.35382E-05 | 0.010072939 |
| 744.079988 | 815.780184  | 1.8411E-05  | 0.013699273 |
| 744.119988 | 1062.108369 | 2.39703E-05 | 0.017836784 |
| 744.159988 | 1258.052422 | 2.83925E-05 | 0.021128556 |
| 744.199988 | 1372.465504 | 3.09746E-05 | 0.023051323 |
| 744.239988 | 1369.103038 | 3.08987E-05 | 0.022996084 |
| 744.279988 | 1218.030808 | 2.74893E-05 | 0.020459705 |
| 744.319988 | 1000.974301 | 2.25906E-05 | 0.016814632 |

|            |             |             |             |
|------------|-------------|-------------|-------------|
| 744.359988 | 792.018869  | 1.78748E-05 | 0.013305258 |
| 744.399988 | 613.07893   | 1.38363E-05 | 0.010299769 |
| 744.439988 | 481.658543  | 1.08704E-05 | 0.008092332 |
| 744.479988 | 372.219398  | 8.40047E-06 | 0.006253984 |
| 744.519988 | 312.361701  | 7.04957E-06 | 0.005248545 |
| 744.559988 | 320.605227  | 7.23561E-06 | 0.005387348 |
| 744.599988 | 360.413718  | 8.13404E-06 | 0.006056603 |
| 744.639988 | 387.962334  | 8.75577E-06 | 0.006519896 |
| 744.679988 | 417.157382  | 9.41466E-06 | 0.00701091  |
| 744.719988 | 427.355039  | 9.64481E-06 | 0.007182681 |
| 744.759988 | 423.887093  | 9.56654E-06 | 0.007124777 |
| 744.799988 | 414.318819  | 9.3506E-06  | 0.006964326 |
| 744.839988 | 396.583207  | 8.95033E-06 | 0.006666564 |
| 744.879988 | 390.691808  | 8.81737E-06 | 0.006567882 |
| 744.919988 | 399.948664  | 9.02628E-06 | 0.00672386  |
| 744.959988 | 506.683337  | 1.14351E-05 | 0.00851872  |
| 744.999988 | 687.459509  | 1.5515E-05  | 0.011558677 |
| 745.039988 | 895.476771  | 2.02097E-05 | 0.015057007 |
| 745.079988 | 1289.205364 | 2.90956E-05 | 0.021678526 |
| 745.119988 | 1768.870091 | 3.99209E-05 | 0.029745886 |
| 745.159988 | 2118.035046 | 4.78011E-05 | 0.035619468 |
| 745.199988 | 2199.828786 | 4.96471E-05 | 0.036996997 |
| 745.239988 | 2052.940185 | 4.6332E-05  | 0.034528459 |
| 745.279988 | 1814.997262 | 4.0962E-05  | 0.030528129 |
| 745.319988 | 1534.125393 | 3.46231E-05 | 0.025805269 |
| 745.359988 | 1211.922773 | 2.73514E-05 | 0.020386646 |
| 745.399988 | 923.933426  | 2.08519E-05 | 0.015542999 |
| 745.439988 | 706.904431  | 1.59538E-05 | 0.011892637 |
| 745.479988 | 537.412636  | 1.21287E-05 | 0.009041669 |
| 745.519988 | 436.613344  | 9.85376E-06 | 0.007346171 |
| 745.559988 | 377.901942  | 8.52872E-06 | 0.006358673 |
| 745.599988 | 367.564308  | 8.29541E-06 | 0.006185061 |
| 745.639988 | 392.028336  | 8.84753E-06 | 0.006597075 |
| 745.679988 | 417.502832  | 9.42246E-06 | 0.007026138 |
| 745.719988 | 423.396508  | 9.55547E-06 | 0.007125705 |
| 745.759988 | 396.027427  | 8.93779E-06 | 0.006665444 |
| 745.799988 | 351.334951  | 7.92914E-06 | 0.005913553 |
| 745.839988 | 309.603899  | 6.98733E-06 | 0.005211429 |
| 745.879988 | 295.814846  | 6.67613E-06 | 0.004979591 |
| 745.919988 | 319.504507  | 7.21077E-06 | 0.005378659 |
| 745.959988 | 381.422206  | 8.60817E-06 | 0.006421349 |
| 745.999988 | 498.666507  | 1.12542E-05 | 0.008395639 |
| 746.039988 | 675.815899  | 1.52522E-05 | 0.011378769 |
| 746.079988 | 909.325905  | 2.05222E-05 | 0.015311217 |
| 746.119988 | 1169.579417 | 2.63958E-05 | 0.019694418 |
| 746.159988 | 1426.438068 | 3.21927E-05 | 0.02402092  |

|            |             |             |             |
|------------|-------------|-------------|-------------|
| 746.199988 | 1615.138801 | 3.64514E-05 | 0.027200059 |
| 746.239988 | 1613.285542 | 3.64096E-05 | 0.027170305 |
| 746.279988 | 1438.776579 | 3.24712E-05 | 0.024232594 |
| 746.319988 | 1212.465793 | 2.73637E-05 | 0.020422049 |
| 746.359988 | 979.583931  | 2.21078E-05 | 0.016500411 |
| 746.399988 | 770.981216  | 1.74E-05    | 0.012987339 |
| 746.439988 | 567.052834  | 1.27976E-05 | 0.009552635 |
| 746.479988 | 424.873945  | 9.58881E-06 | 0.007157857 |
| 746.519988 | 371.818663  | 8.39143E-06 | 0.00626437  |
| 746.559988 | 354.556718  | 8.00185E-06 | 0.005973862 |
| 746.599988 | 374.493657  | 8.4518E-06  | 0.006310114 |
| 746.639988 | 438.542891  | 9.8973E-06  | 0.007389722 |
| 746.679988 | 434.368303  | 9.80309E-06 | 0.007319769 |
| 746.719988 | 423.872396  | 9.56621E-06 | 0.00714328  |
| 746.759988 | 410.842292  | 9.27214E-06 | 0.006924062 |
| 746.799988 | 365.936759  | 8.25868E-06 | 0.006167584 |
| 746.839988 | 338.456654  | 7.6385E-06  | 0.005704734 |
| 746.879988 | 365.094585  | 8.23968E-06 | 0.006154049 |
| 746.919988 | 446.755134  | 1.00826E-05 | 0.007530926 |
| 746.959988 | 611.211813  | 1.37942E-05 | 0.010303715 |
| 746.999988 | 930.067151  | 2.09903E-05 | 0.015679769 |
| 747.039988 | 1401.093959 | 3.16207E-05 | 0.023621957 |
| 747.079988 | 1914.165582 | 4.32001E-05 | 0.032273894 |
| 747.119988 | 2326.09163  | 5.24966E-05 | 0.039221295 |
| 747.159988 | 2610.204823 | 5.89087E-05 | 0.044014214 |
| 747.199988 | 2594.403793 | 5.85521E-05 | 0.043750113 |
| 747.239988 | 2342.938869 | 5.28769E-05 | 0.039511709 |
| 747.279988 | 1923.292368 | 4.3406E-05  | 0.032436457 |
| 747.319988 | 1418.662598 | 3.20172E-05 | 0.023927123 |
| 747.359988 | 1027.180078 | 2.3182E-05  | 0.017325317 |
| 747.399988 | 781.400433  | 1.76351E-05 | 0.013180488 |
| 747.439988 | 595.239418  | 1.34337E-05 | 0.010040903 |
| 747.479988 | 454.016618  | 1.02465E-05 | 0.007659071 |
| 747.519988 | 374.590726  | 8.45399E-06 | 0.006319527 |
| 747.559988 | 349.536025  | 7.88854E-06 | 0.005897158 |
| 747.599988 | 355.49549   | 8.02304E-06 | 0.005998023 |
| 747.639988 | 362.368335  | 8.17815E-06 | 0.006114311 |
| 747.679988 | 351.267804  | 7.92763E-06 | 0.005927327 |
| 747.719988 | 367.127012  | 8.28555E-06 | 0.006195268 |
| 747.759988 | 396.50417   | 8.94855E-06 | 0.006691365 |
| 747.799988 | 384.383816  | 8.67501E-06 | 0.00648717  |
| 747.839988 | 352.98986   | 7.96649E-06 | 0.005957659 |
| 747.879988 | 327.934757  | 7.40103E-06 | 0.005535083 |
| 747.919988 | 331.178691  | 7.47424E-06 | 0.005590135 |
| 747.959988 | 401.805739  | 9.0682E-06  | 0.006782648 |
| 747.999988 | 546.378415  | 1.2331E-05  | 0.009223588 |

|            |             |             |             |
|------------|-------------|-------------|-------------|
| 748.039988 | 792.675392  | 1.78896E-05 | 0.013382121 |
| 748.079988 | 1081.3342   | 2.44042E-05 | 0.018256299 |
| 748.119988 | 1413.206644 | 3.18941E-05 | 0.023860618 |
| 748.159988 | 1678.064573 | 3.78716E-05 | 0.028334001 |
| 748.199988 | 1779.782664 | 4.01672E-05 | 0.03005311  |
| 748.239988 | 1724.993544 | 3.89307E-05 | 0.029129508 |
| 748.279988 | 1525.508587 | 3.44286E-05 | 0.025762235 |
| 748.319988 | 1268.462384 | 2.86274E-05 | 0.021422477 |
| 748.359988 | 1046.114515 | 2.36093E-05 | 0.017668291 |
| 748.399988 | 822.583564  | 1.85646E-05 | 0.01389372  |
| 748.439988 | 620.317044  | 1.39997E-05 | 0.010477929 |
| 748.479988 | 463.470822  | 1.04599E-05 | 0.007829019 |
| 748.519988 | 378.182092  | 8.53504E-06 | 0.00638865  |
| 748.559988 | 358.172908  | 8.08346E-06 | 0.006050957 |
| 748.599988 | 363.126305  | 8.19525E-06 | 0.006134968 |
| 748.639988 | 399.323931  | 9.01218E-06 | 0.006746882 |
| 748.679988 | 441.747649  | 9.96963E-06 | 0.007464062 |
| 748.719988 | 475.960776  | 1.07418E-05 | 0.008042579 |
| 748.759988 | 455.447254  | 1.02788E-05 | 0.007696362 |
| 748.799988 | 390.799929  | 8.81981E-06 | 0.006604274 |
| 748.839988 | 378.352393  | 8.53889E-06 | 0.00639426  |
| 748.879988 | 449.869148  | 1.01529E-05 | 0.007603319 |
| 748.919988 | 543.833409  | 1.22736E-05 | 0.009191916 |
| 748.959988 | 785.332618  | 1.77239E-05 | 0.013274464 |
| 748.999988 | 1286.665969 | 2.90383E-05 | 0.021749655 |
| 749.039988 | 2093.590901 | 4.72494E-05 | 0.035391713 |
| 749.079988 | 3008.769863 | 6.79037E-05 | 0.050865336 |
| 749.119988 | 3627.000462 | 8.18563E-05 | 0.061320227 |
| 749.159988 | 3813.127175 | 8.6057E-05  | 0.064470438 |
| 749.199988 | 3499.218896 | 7.89725E-05 | 0.059166193 |
| 749.239988 | 2844.799633 | 6.42032E-05 | 0.048103579 |
| 749.279988 | 2164.59668  | 4.88519E-05 | 0.036603775 |
| 749.319988 | 1594.623374 | 3.59884E-05 | 0.026966849 |
| 749.359988 | 1167.740289 | 2.63543E-05 | 0.019748837 |
| 749.399988 | 832.384703  | 1.87858E-05 | 0.014078051 |
| 749.439988 | 580.512184  | 1.31014E-05 | 0.009818677 |
| 749.479988 | 433.05394   | 9.77342E-06 | 0.007324986 |
| 749.519988 | 346.913635  | 7.82936E-06 | 0.00586826  |
| 749.559988 | 325.366656  | 7.34307E-06 | 0.005504073 |
| 749.599988 | 329.106199  | 7.42747E-06 | 0.00556763  |
| 749.639988 | 356.513206  | 8.04601E-06 | 0.006031608 |
| 749.679988 | 430.94768   | 9.72589E-06 | 0.007291304 |
| 749.719988 | 442.607701  | 9.98904E-06 | 0.007488982 |
| 749.759988 | 399.642614  | 9.01938E-06 | 0.006762368 |
| 749.799988 | 357.646975  | 8.07159E-06 | 0.006052081 |
| 749.839988 | 337.643303  | 7.62014E-06 | 0.005713885 |

|            |             |             |             |
|------------|-------------|-------------|-------------|
| 749.879988 | 331.436805  | 7.48007E-06 | 0.005609153 |
| 749.919988 | 377.214634  | 8.51321E-06 | 0.006384225 |
| 749.959988 | 491.092609  | 1.10833E-05 | 0.008312014 |
| 749.999988 | 694.146186  | 1.56659E-05 | 0.011749434 |
| 750.039988 | 1026.491625 | 2.31665E-05 | 0.017375791 |
| 750.079988 | 1502.567395 | 3.39109E-05 | 0.025435852 |
| 750.119988 | 1865.33011  | 4.20979E-05 | 0.031578478 |
| 750.159988 | 2047.149021 | 4.62013E-05 | 0.034658368 |
| 750.199988 | 2092.337932 | 4.72212E-05 | 0.035425308 |
| 750.239988 | 1961.626381 | 4.42712E-05 | 0.033214006 |
| 750.279988 | 1624.62376  | 3.66655E-05 | 0.027509387 |
| 750.319988 | 1247.994448 | 2.81655E-05 | 0.021133135 |
| 750.359988 | 925.733527  | 2.08925E-05 | 0.015676908 |
| 750.399988 | 679.160219  | 1.53277E-05 | 0.011501906 |
| 750.439988 | 502.58424   | 1.13426E-05 | 0.00851196  |
| 750.479988 | 414.652511  | 9.35813E-06 | 0.007023089 |
| 750.519988 | 373.888356  | 8.43814E-06 | 0.006332992 |
| 750.559988 | 354.770959  | 8.00669E-06 | 0.006009498 |
| 750.599988 | 397.83095   | 8.97849E-06 | 0.006739255 |
| 750.639988 | 482.646069  | 1.08926E-05 | 0.008176458 |
| 750.679988 | 557.849762  | 1.25899E-05 | 0.00945098  |
| 750.719988 | 570.406254  | 1.28733E-05 | 0.009664225 |
| 750.759988 | 534.951475  | 1.20731E-05 | 0.009064008 |
| 750.799988 | 483.157934  | 1.09042E-05 | 0.008186874 |
| 750.839988 | 449.287117  | 1.01398E-05 | 0.007613356 |
| 750.879988 | 454.758419  | 1.02633E-05 | 0.00770648  |
| 750.919988 | 500.369699  | 1.12926E-05 | 0.008479874 |
| 750.959988 | 616.141841  | 1.39055E-05 | 0.010442446 |
| 750.999988 | 896.590776  | 2.02348E-05 | 0.015196338 |
| 751.039988 | 1301.223487 | 2.93668E-05 | 0.022055642 |
| 751.079988 | 1777.890889 | 4.01245E-05 | 0.030136725 |
| 751.119988 | 2197.961418 | 4.96049E-05 | 0.037259253 |
| 751.159988 | 2425.947108 | 5.47502E-05 | 0.041126195 |
| 751.199988 | 2429.124634 | 5.4822E-05  | 0.041182255 |
| 751.239988 | 2235.358654 | 5.04489E-05 | 0.037899254 |
| 751.279988 | 1856.836933 | 4.19062E-05 | 0.031483307 |
| 751.319988 | 1404.877244 | 3.17061E-05 | 0.023821444 |
| 751.359988 | 1032.798742 | 2.33088E-05 | 0.017513322 |
| 751.399988 | 766.586736  | 1.73008E-05 | 0.012999817 |
| 751.439988 | 568.385792  | 1.28277E-05 | 0.009639228 |
| 751.479988 | 458.872734  | 1.03561E-05 | 0.007782416 |
| 751.519988 | 415.806253  | 9.38417E-06 | 0.00705239  |
| 751.559988 | 397.523861  | 8.97156E-06 | 0.006742665 |
| 751.599988 | 431.784667  | 9.74478E-06 | 0.007324175 |
| 751.639988 | 473.848371  | 1.06941E-05 | 0.008038111 |
| 751.679988 | 477.476802  | 1.0776E-05  | 0.008100093 |



|            |             |             |             |
|------------|-------------|-------------|-------------|
| 751.719988 | 444.960971  | 1.00421E-05 | 0.007548884 |
| 751.759988 | 409.427595  | 9.24021E-06 | 0.006946421 |
| 751.799988 | 384.931557  | 8.68737E-06 | 0.006531164 |
| 751.839988 | 333.437578  | 7.52522E-06 | 0.005657763 |
| 751.879988 | 315.739789  | 7.12581E-06 | 0.005357752 |
| 751.919988 | 339.366308  | 7.65902E-06 | 0.005758974 |
| 751.959988 | 406.709084  | 9.17886E-06 | 0.006902134 |
| 751.999988 | 528.597936  | 1.19297E-05 | 0.008971149 |
| 752.039988 | 746.251766  | 1.68419E-05 | 0.012665754 |
| 752.079988 | 978.460584  | 2.20825E-05 | 0.016607801 |
| 752.119988 | 1256.315099 | 2.83533E-05 | 0.02132507  |
| 752.159988 | 1498.581753 | 3.38209E-05 | 0.02543873  |
| 752.199988 | 1592.056495 | 3.59305E-05 | 0.02702692  |
| 752.239988 | 1508.680977 | 3.40488E-05 | 0.02561289  |
| 752.279988 | 1312.021958 | 2.96105E-05 | 0.022275393 |
| 752.319988 | 1072.281958 | 2.41999E-05 | 0.018206076 |
| 752.359988 | 838.850542  | 1.89317E-05 | 0.014243445 |
| 752.399988 | 613.015495  | 1.38349E-05 | 0.010409383 |
| 752.439988 | 450.282377  | 1.01622E-05 | 0.00764648  |
| 752.479988 | 382.954819  | 8.64276E-06 | 0.006503502 |
| 752.519988 | 358.070979  | 8.08116E-06 | 0.006081237 |
| 752.559988 | 342.101567  | 7.72076E-06 | 0.005810332 |
| 752.599988 | 363.283846  | 8.19881E-06 | 0.006170425 |
| 752.639988 | 400.819132  | 9.04593E-06 | 0.006808328 |
| 752.679988 | 429.217836  | 9.68685E-06 | 0.007291097 |
| 752.719988 | 421.044168  | 9.50238E-06 | 0.007152632 |
| 752.759988 | 432.898918  | 9.76993E-06 | 0.007354409 |
| 752.799988 | 447.8165    | 1.01066E-05 | 0.007608244 |
| 752.839988 | 414.868232  | 9.363E-06   | 0.007048839 |
| 752.879988 | 382.689557  | 8.63677E-06 | 0.006502451 |
| 752.919988 | 412.754833  | 9.3153E-06  | 0.007013677 |
| 752.959988 | 504.121804  | 1.13773E-05 | 0.008566672 |
| 752.999988 | 657.051088  | 1.48287E-05 | 0.011166032 |
| 753.039988 | 904.695998  | 2.04177E-05 | 0.015375366 |
| 753.079988 | 1247.938827 | 2.81642E-05 | 0.021209926 |
| 753.119988 | 1627.919311 | 3.67399E-05 | 0.027669531 |
| 753.159988 | 1950.629895 | 4.4023E-05  | 0.033156362 |
| 753.199988 | 2063.642412 | 4.65735E-05 | 0.035079186 |
| 753.239988 | 1953.200158 | 4.4081E-05  | 0.033203577 |
| 753.279988 | 1708.531479 | 3.85592E-05 | 0.029045855 |
| 753.319988 | 1402.712578 | 3.16573E-05 | 0.023848054 |
| 753.359988 | 1050.880478 | 2.37169E-05 | 0.01786737  |
| 753.399988 | 754.171764  | 1.70206E-05 | 0.012823325 |
| 753.439988 | 547.627794  | 1.23592E-05 | 0.009311913 |
| 753.479988 | 406.175038  | 9.1668E-06  | 0.006907004 |
| 753.519988 | 342.692709  | 7.7341E-06  | 0.005827797 |

|            |             |             |             |
|------------|-------------|-------------|-------------|
| 753.559988 | 337.2255    | 7.61071E-06 | 0.005735126 |
| 753.599988 | 348.025581  | 7.85445E-06 | 0.005919115 |
| 753.639988 | 397.699962  | 8.97553E-06 | 0.006764321 |
| 753.679988 | 437.699883  | 9.87828E-06 | 0.007445059 |
| 753.719988 | 434.098918  | 9.79701E-06 | 0.007384201 |
| 753.759988 | 396.218665  | 8.9421E-06  | 0.0067402   |
| 753.799988 | 364.371069  | 8.22335E-06 | 0.006198759 |
| 753.839988 | 323.541841  | 7.30189E-06 | 0.005504456 |
| 753.879988 | 295.89762   | 6.678E-06   | 0.005034408 |
| 753.919988 | 291.148618  | 6.57082E-06 | 0.004953872 |
| 753.959988 | 341.900075  | 7.71621E-06 | 0.005817712 |
| 753.999988 | 440.28504   | 9.93662E-06 | 0.007492211 |
| 754.039988 | 588.42211   | 1.32799E-05 | 0.010013551 |
| 754.079988 | 797.071898  | 1.79888E-05 | 0.013564996 |
| 754.119988 | 1065.903973 | 2.4056E-05  | 0.018141086 |
| 754.159988 | 1305.589676 | 2.94653E-05 | 0.022221581 |
| 754.199988 | 1416.357735 | 3.19652E-05 | 0.024108169 |
| 754.239988 | 1392.709357 | 3.14315E-05 | 0.023706902 |
| 754.279988 | 1229.804672 | 2.7755E-05  | 0.020935025 |
| 754.319988 | 1029.23002  | 2.32283E-05 | 0.017521562 |
| 754.359988 | 844.076646  | 1.90496E-05 | 0.014370282 |
| 754.399988 | 642.735569  | 1.45056E-05 | 0.01094306  |
| 754.439988 | 465.661242  | 1.05093E-05 | 0.007928655 |
| 754.479988 | 341.067727  | 7.69742E-06 | 0.005807552 |
| 754.519988 | 288.296554  | 6.50645E-06 | 0.004909248 |
| 754.559988 | 294.467936  | 6.64573E-06 | 0.005014603 |
| 754.599988 | 339.58251   | 7.6639E-06  | 0.005783182 |
| 754.639988 | 393.472147  | 8.88012E-06 | 0.006701292 |
| 754.679988 | 420.17409   | 9.48274E-06 | 0.007156437 |
| 754.719988 | 432.170074  | 9.75348E-06 | 0.007361144 |
| 754.759988 | 415.411942  | 9.37527E-06 | 0.007076078 |
| 754.799988 | 416.445455  | 9.39859E-06 | 0.007094059 |
| 754.839988 | 412.773437  | 9.31572E-06 | 0.007031879 |
| 754.879988 | 401.387203  | 9.05875E-06 | 0.006838269 |
| 754.919988 | 408.527048  | 9.21989E-06 | 0.006960277 |
| 754.959988 | 438.509612  | 9.89655E-06 | 0.0074715   |
| 754.999988 | 545.202165  | 1.23045E-05 | 0.009289862 |
| 755.039988 | 773.741908  | 1.74623E-05 | 0.013184718 |
| 755.079988 | 1116.024545 | 2.51871E-05 | 0.01901829  |
| 755.119988 | 1493.604929 | 3.37086E-05 | 0.025454025 |
| 755.159988 | 1753.405182 | 3.95719E-05 | 0.029883125 |
| 755.199988 | 1934.579043 | 4.36608E-05 | 0.032972601 |
| 755.239988 | 1939.654826 | 4.37753E-05 | 0.033060863 |
| 755.279988 | 1729.828162 | 3.90398E-05 | 0.029485989 |
| 755.319988 | 1411.263673 | 3.18503E-05 | 0.024057135 |
| 755.359988 | 1090.896571 | 2.462E-05   | 0.018596975 |

|            |             |             |             |
|------------|-------------|-------------|-------------|
| 755.399988 | 795.496823  | 1.79533E-05 | 0.013561889 |
| 755.439988 | 583.764621  | 1.31748E-05 | 0.009952736 |
| 755.479988 | 433.16654   | 9.77597E-06 | 0.007385546 |
| 755.519988 | 359.703625  | 8.11801E-06 | 0.006133319 |
| 755.559988 | 351.167506  | 7.92536E-06 | 0.005988086 |
| 755.599988 | 375.429849  | 8.47293E-06 | 0.006402145 |
| 755.639988 | 393.494228  | 8.88062E-06 | 0.006710549 |
| 755.679988 | 395.037542  | 8.91545E-06 | 0.006737225 |
| 755.719988 | 378.491979  | 8.54204E-06 | 0.006455388 |
| 755.759988 | 350.529188  | 7.91096E-06 | 0.005978784 |
| 755.799988 | 334.379063  | 7.54647E-06 | 0.005703622 |
| 755.839988 | 346.745501  | 7.82556E-06 | 0.005914873 |
| 755.879988 | 319.71091   | 7.21543E-06 | 0.005453999 |
| 755.919988 | 291.790609  | 6.58531E-06 | 0.004977966 |
| 755.959988 | 318.061412  | 7.1782E-06  | 0.005426434 |
| 755.999988 | 407.325108  | 9.19276E-06 | 0.006949727 |
| 756.039988 | 548.284666  | 1.2374E-05  | 0.009355255 |
| 756.079988 | 723.079242  | 1.63189E-05 | 0.012338387 |
| 756.119988 | 979.805736  | 2.21129E-05 | 0.016719968 |
| 756.159988 | 1242.666399 | 2.80452E-05 | 0.021206696 |
| 756.199988 | 1393.2974   | 3.14448E-05 | 0.023778543 |
| 756.239988 | 1392.765004 | 3.14328E-05 | 0.023770715 |
| 756.279988 | 1254.421905 | 2.83106E-05 | 0.021410706 |
| 756.319988 | 1029.769171 | 2.32405E-05 | 0.017577221 |
| 756.359988 | 780.110327  | 1.7606E-05  | 0.013316477 |
| 756.399988 | 579.106901  | 1.30696E-05 | 0.009885873 |
| 756.439988 | 465.310688  | 1.05014E-05 | 0.00794369  |
| 756.479988 | 372.831881  | 8.4143E-06  | 0.006365247 |
| 756.519988 | 304.31038   | 6.86786E-06 | 0.005195674 |
| 756.559988 | 313.885831  | 7.08397E-06 | 0.005359445 |
| 756.599988 | 385.001025  | 8.68894E-06 | 0.00657405  |
| 756.639988 | 429.748859  | 9.69883E-06 | 0.007338525 |
| 756.679988 | 410.706444  | 9.26907E-06 | 0.007013722 |
| 756.719988 | 371.597084  | 8.38643E-06 | 0.006346178 |
| 756.759988 | 360.75516   | 8.14174E-06 | 0.006161344 |
| 756.799988 | 379.686714  | 8.569E-06   | 0.006485019 |
| 756.839988 | 375.293561  | 8.46985E-06 | 0.006410323 |
| 756.879988 | 384.215978  | 8.67122E-06 | 0.006563072 |
| 756.919988 | 401.477662  | 9.06079E-06 | 0.006858294 |
| 756.959988 | 457.934705  | 1.03349E-05 | 0.007823142 |
| 756.999988 | 637.193781  | 1.43806E-05 | 0.010886096 |
| 757.039988 | 950.419536  | 2.14496E-05 | 0.016238239 |
| 757.079988 | 1299.813128 | 2.9335E-05  | 0.02220892  |
| 757.119988 | 1684.399607 | 3.80146E-05 | 0.028781578 |
| 757.159988 | 2047.9938   | 4.62204E-05 | 0.034996213 |
| 757.199988 | 2215.924403 | 5.00103E-05 | 0.037867819 |

|            |             |             |             |
|------------|-------------|-------------|-------------|
| 757.239988 | 2185.849552 | 4.93316E-05 | 0.037355845 |
| 757.279988 | 1991.071604 | 4.49357E-05 | 0.034028916 |
| 757.319988 | 1591.762114 | 3.59239E-05 | 0.027205853 |
| 757.359988 | 1186.25267  | 2.67721E-05 | 0.020276095 |
| 757.399988 | 868.576912  | 1.96026E-05 | 0.014846987 |
| 757.439988 | 628.338948  | 1.41807E-05 | 0.010741056 |
| 757.479988 | 445.961004  | 1.00647E-05 | 0.007623823 |
| 757.519988 | 351.886196  | 7.94158E-06 | 0.006015907 |
| 757.559988 | 307.351228  | 6.93649E-06 | 0.005254807 |
| 757.599988 | 345.510212  | 7.79768E-06 | 0.005907525 |
| 757.639988 | 408.709108  | 9.224E-06   | 0.006988468 |
| 757.679988 | 441.140616  | 9.95593E-06 | 0.007543408 |
| 757.719988 | 425.778831  | 9.60924E-06 | 0.00728111  |
| 757.759988 | 382.169966  | 8.62504E-06 | 0.006535713 |
| 757.799988 | 350.60936   | 7.91276E-06 | 0.005996293 |
| 757.839988 | 299.25912   | 6.75386E-06 | 0.005118346 |
| 757.879988 | 298.118272  | 6.72811E-06 | 0.005099103 |
| 757.919988 | 312.221954  | 7.04641E-06 | 0.005340618 |
| 757.959988 | 339.38052   | 7.65935E-06 | 0.005805478 |
| 757.999988 | 455.667811  | 1.02838E-05 | 0.007795111 |
| 758.039988 | 665.306323  | 1.5015E-05  | 0.011381998 |
| 758.079988 | 939.993396  | 2.12143E-05 | 0.016082168 |
| 758.119988 | 1282.178263 | 2.8937E-05  | 0.021937701 |
| 758.159988 | 1619.947889 | 3.656E-05   | 0.027718304 |
| 758.199988 | 1860.505973 | 4.1989E-05  | 0.031836081 |
| 758.239988 | 1860.922718 | 4.19984E-05 | 0.031844892 |
| 758.279988 | 1617.049245 | 3.64945E-05 | 0.027673086 |
| 758.319988 | 1256.515111 | 2.83578E-05 | 0.021504283 |
| 758.359988 | 929.931568  | 2.09873E-05 | 0.015915898 |
| 758.399988 | 683.046583  | 1.54154E-05 | 0.011691047 |
| 758.439988 | 535.490736  | 1.20853E-05 | 0.00916596  |
| 758.479988 | 423.557253  | 9.5591E-06  | 0.007250384 |
| 758.519988 | 342.323938  | 7.72577E-06 | 0.005860154 |
| 758.559988 | 341.10481   | 7.69826E-06 | 0.005839592 |
| 758.599988 | 416.397275  | 9.39751E-06 | 0.007128948 |
| 758.639988 | 520.239669  | 1.17411E-05 | 0.008907256 |
| 758.679988 | 571.772704  | 1.29041E-05 | 0.009790093 |
| 758.719988 | 591.783686  | 1.33557E-05 | 0.010133262 |
| 758.759988 | 567.698122  | 1.28122E-05 | 0.009721351 |
| 758.799988 | 485.175582  | 1.09497E-05 | 0.00830866  |
| 758.839988 | 430.800381  | 9.72256E-06 | 0.007377871 |
| 758.879988 | 419.155339  | 9.45975E-06 | 0.007178817 |
| 758.919988 | 422.112324  | 9.52649E-06 | 0.007229842 |
| 758.959988 | 450.528591  | 1.01678E-05 | 0.007716955 |
| 758.999988 | 594.867223  | 1.34253E-05 | 0.010189821 |
| 759.039988 | 893.494204  | 2.01649E-05 | 0.01530598  |

|            |             |             |             |
|------------|-------------|-------------|-------------|
| 759.079988 | 1227.182221 | 2.76958E-05 | 0.021023323 |
| 759.119988 | 1542.81587  | 3.48192E-05 | 0.026431955 |
| 759.159988 | 1857.504074 | 4.19213E-05 | 0.031824958 |
| 759.199988 | 2064.308829 | 4.65886E-05 | 0.035370046 |
| 759.239988 | 2058.65059  | 4.64609E-05 | 0.035274955 |
| 759.279987 | 1841.56856  | 4.15616E-05 | 0.031556919 |
| 759.319987 | 1476.276246 | 3.33175E-05 | 0.025298643 |
| 759.359987 | 1100.365437 | 2.48337E-05 | 0.01885773  |
| 759.399987 | 779.092335  | 1.7583E-05  | 0.013352552 |
| 759.439987 | 567.622216  | 1.28104E-05 | 0.009728763 |
| 759.479987 | 451.778224  | 1.0196E-05  | 0.007743662 |
| 759.519987 | 396.267748  | 8.94321E-06 | 0.006792548 |
| 759.559987 | 361.361291  | 8.15542E-06 | 0.006194531 |
| 759.599987 | 356.22865   | 8.03958E-06 | 0.006106868 |
| 759.639987 | 383.641716  | 8.65826E-06 | 0.00657716  |
| 759.679987 | 434.417858  | 9.80421E-06 | 0.007448059 |
| 759.719987 | 469.229305  | 1.05899E-05 | 0.008045322 |
| 759.759987 | 454.493956  | 1.02573E-05 | 0.007793083 |
| 759.799987 | 394.882925  | 8.91196E-06 | 0.006771305 |
| 759.839987 | 337.531599  | 7.61762E-06 | 0.005788171 |
| 759.879987 | 314.325413  | 7.09389E-06 | 0.005390503 |
| 759.919987 | 313.606201  | 7.07766E-06 | 0.005378452 |
| 759.959987 | 362.689223  | 8.18539E-06 | 0.006220569 |
| 759.999987 | 445.016657  | 1.00434E-05 | 0.007632988 |
| 760.039987 | 555.76055   | 1.25427E-05 | 0.009532985 |
| 760.079987 | 744.682057  | 1.68064E-05 | 0.012774236 |
| 760.119987 | 995.548012  | 2.24681E-05 | 0.017078476 |
| 760.159987 | 1232.720503 | 2.78208E-05 | 0.021148247 |
| 760.199987 | 1377.324225 | 3.10843E-05 | 0.023630276 |
| 760.239987 | 1377.885783 | 3.1097E-05  | 0.023641155 |
| 760.279987 | 1263.663629 | 2.85191E-05 | 0.021682522 |
| 760.319987 | 1069.443598 | 2.41359E-05 | 0.018350971 |
| 760.359987 | 829.656851  | 1.87242E-05 | 0.014237132 |
| 760.399987 | 619.907406  | 1.39904E-05 | 0.010638335 |
| 760.439987 | 483.483651  | 1.09116E-05 | 0.008297581 |
| 760.479987 | 399.382767  | 9.01351E-06 | 0.006854596 |
| 760.519987 | 338.731467  | 7.6447E-06  | 0.005813945 |
| 760.559987 | 340.53061   | 7.6853E-06  | 0.005845133 |
| 760.599987 | 374.193432  | 8.44502E-06 | 0.006423286 |
| 760.639987 | 408.090857  | 9.21004E-06 | 0.007005526 |
| 760.679987 | 445.462715  | 1.00535E-05 | 0.007647476 |
| 760.719987 | 478.185291  | 1.0792E-05  | 0.008209672 |
| 760.759987 | 486.023825  | 1.09689E-05 | 0.008344686 |
| 760.799987 | 461.129992  | 1.04071E-05 | 0.007917692 |
| 760.839987 | 408.259044  | 9.21384E-06 | 0.007010256 |
| 760.879987 | 380.722126  | 8.59237E-06 | 0.006537761 |

|            |             |             |             |
|------------|-------------|-------------|-------------|
| 760.919987 | 416.151609  | 9.39196E-06 | 0.007146532 |
| 760.959987 | 531.200559  | 1.19885E-05 | 0.009122736 |
| 760.999987 | 759.638695  | 1.7144E-05  | 0.013046574 |
| 761.039987 | 1015.934751 | 2.29282E-05 | 0.017449302 |
| 761.079987 | 1258.542995 | 2.84036E-05 | 0.021617383 |
| 761.119987 | 1541.150831 | 3.47816E-05 | 0.026472992 |
| 761.159987 | 1805.369607 | 4.07447E-05 | 0.031013218 |
| 761.199987 | 1936.09183  | 4.36949E-05 | 0.033260554 |
| 761.239987 | 1869.345129 | 4.21885E-05 | 0.032115585 |
| 761.279987 | 1646.360459 | 3.71561E-05 | 0.028286167 |
| 761.319987 | 1403.77596  | 3.16813E-05 | 0.024119583 |
| 761.359987 | 1170.715179 | 2.64214E-05 | 0.020116205 |
| 761.399987 | 924.154614  | 2.08569E-05 | 0.01588043  |
| 761.439987 | 717.709027  | 1.61977E-05 | 0.012333571 |
| 761.479987 | 537.871942  | 1.2139E-05  | 0.009243621 |
| 761.519987 | 421.655353  | 9.51617E-06 | 0.007246757 |
| 761.559987 | 355.82974   | 8.03058E-06 | 0.00611577  |
| 761.599987 | 364.479957  | 8.2258E-06  | 0.006264773 |
| 761.639987 | 400.068891  | 9.029E-06   | 0.006876846 |
| 761.679987 | 413.760046  | 9.33799E-06 | 0.007112559 |
| 761.719987 | 400.615629  | 9.04134E-06 | 0.006886967 |
| 761.759987 | 394.793243  | 8.90993E-06 | 0.006787231 |
| 761.799987 | 374.716042  | 8.45682E-06 | 0.006442405 |
| 761.839987 | 335.628108  | 7.57466E-06 | 0.005770678 |
| 761.879987 | 309.310691  | 6.98071E-06 | 0.005318464 |
| 761.919987 | 313.039922  | 7.06488E-06 | 0.005382869 |
| 761.959987 | 382.603008  | 8.63482E-06 | 0.006579385 |
| 761.999987 | 466.416525  | 1.05264E-05 | 0.008021095 |
| 762.039987 | 623.2275    | 1.40654E-05 | 0.010718379 |
| 762.079987 | 877.198118  | 1.97971E-05 | 0.015087004 |
| 762.119987 | 1092.761825 | 2.46621E-05 | 0.018795489 |
| 762.159987 | 1222.140249 | 2.7582E-05  | 0.021021899 |
| 762.199987 | 1222.239027 | 2.75842E-05 | 0.021024702 |
| 762.239987 | 1155.302828 | 2.60736E-05 | 0.019874322 |
| 762.279987 | 1125.238732 | 2.53951E-05 | 0.019358154 |
| 762.319987 | 1071.764563 | 2.41882E-05 | 0.018439174 |
| 762.359987 | 923.298161  | 2.08376E-05 | 0.015885717 |
| 762.399987 | 708.169434  | 1.59824E-05 | 0.01218498  |
| 762.439987 | 538.163799  | 1.21456E-05 | 0.009260297 |
| 762.479987 | 450.098845  | 1.01581E-05 | 0.007745351 |
| 762.519987 | 398.231734  | 8.98754E-06 | 0.006853175 |
| 762.559987 | 387.871413  | 8.75372E-06 | 0.006675235 |
| 762.599987 | 423.94558   | 9.56786E-06 | 0.007296451 |
| 762.639987 | 449.542469  | 1.01455E-05 | 0.0077374   |
| 762.679987 | 427.716884  | 9.65297E-06 | 0.00736213  |
| 762.719987 | 401.123133  | 9.05279E-06 | 0.006904744 |

|            |             |             |             |
|------------|-------------|-------------|-------------|
| 762.759987 | 389.864328  | 8.79869E-06 | 0.006711292 |
| 762.799987 | 417.777359  | 9.42865E-06 | 0.007192176 |
| 762.839987 | 437.46542   | 9.87299E-06 | 0.007531508 |
| 762.879987 | 404.376764  | 9.12622E-06 | 0.006962211 |
| 762.919987 | 392.144168  | 8.85015E-06 | 0.006751955 |
| 762.959987 | 503.287038  | 1.13585E-05 | 0.008666071 |
| 762.999987 | 783.843536  | 1.76903E-05 | 0.013497666 |
| 763.039987 | 1150.519304 | 2.59656E-05 | 0.019812805 |
| 763.079987 | 1535.285975 | 3.46493E-05 | 0.026440161 |
| 763.119987 | 1832.980104 | 4.13678E-05 | 0.031568601 |
| 763.159987 | 2050.188441 | 4.62699E-05 | 0.035311334 |
| 763.199987 | 2041.437428 | 4.60724E-05 | 0.035162455 |
| 763.239987 | 1849.50961  | 4.17409E-05 | 0.03185829  |
| 763.279987 | 1588.178165 | 3.5843E-05  | 0.027358221 |
| 763.319987 | 1294.674389 | 2.9219E-05  | 0.022303445 |
| 763.359987 | 1015.63711  | 2.29215E-05 | 0.017497367 |
| 763.399987 | 766.769222  | 1.73049E-05 | 0.013210571 |
| 763.439987 | 593.174782  | 1.33871E-05 | 0.010220269 |
| 763.479987 | 460.718394  | 1.03978E-05 | 0.007938491 |
| 763.519987 | 400.095705  | 9.0296E-06  | 0.006894282 |
| 763.559987 | 387.96206   | 8.75576E-06 | 0.006685551 |
| 763.599987 | 385.040444  | 8.68983E-06 | 0.006635551 |
| 763.639987 | 417.900155  | 9.43142E-06 | 0.007202213 |
| 763.679987 | 458.155491  | 1.03399E-05 | 0.007896399 |
| 763.719987 | 445.901844  | 1.00634E-05 | 0.007685607 |
| 763.759987 | 441.568366  | 9.96558E-06 | 0.007611314 |
| 763.799987 | 420.351718  | 9.48675E-06 | 0.007245982 |
| 763.839987 | 356.790941  | 8.05227E-06 | 0.006150649 |
| 763.879987 | 326.829037  | 7.37608E-06 | 0.005634437 |
| 763.919987 | 353.775544  | 7.98422E-06 | 0.006099306 |
| 763.959987 | 391.659062  | 8.8392E-06  | 0.006752795 |
| 763.999987 | 486.327173  | 1.09757E-05 | 0.008385455 |
| 764.039987 | 694.74415   | 1.56794E-05 | 0.011979695 |
| 764.079987 | 934.475207  | 2.10898E-05 | 0.016114297 |
| 764.119987 | 1168.622845 | 2.63742E-05 | 0.020153046 |
| 764.159987 | 1357.982076 | 3.06478E-05 | 0.023419795 |
| 764.199987 | 1457.815126 | 3.29009E-05 | 0.025142834 |
| 764.239987 | 1462.433961 | 3.30051E-05 | 0.025223815 |
| 764.279987 | 1321.702788 | 2.9829E-05  | 0.022797701 |
| 764.319987 | 1106.305087 | 2.49678E-05 | 0.019083362 |
| 764.359987 | 879.401378  | 1.98469E-05 | 0.015170149 |
| 764.399987 | 676.649682  | 1.5271E-05  | 0.011673183 |
| 764.439987 | 476.371189  | 1.0751E-05  | 0.00821852  |
| 764.479987 | 358.739982  | 8.09626E-06 | 0.00618943  |
| 764.519987 | 349.112103  | 7.87897E-06 | 0.006023633 |
| 764.559987 | 392.810686  | 8.86519E-06 | 0.00677797  |

|            |             |             |             |
|------------|-------------|-------------|-------------|
| 764.599987 | 430.57976   | 9.71759E-06 | 0.007430066 |
| 764.639987 | 451.476237  | 1.01892E-05 | 0.007791062 |
| 764.679987 | 457.133509  | 1.03169E-05 | 0.007889101 |
| 764.719987 | 459.223082  | 1.0364E-05  | 0.007925577 |
| 764.759987 | 439.381582  | 9.91623E-06 | 0.007583536 |
| 764.799987 | 448.118632  | 1.01134E-05 | 0.007734738 |
| 764.839987 | 441.264678  | 9.95873E-06 | 0.007616834 |
| 764.879987 | 449.665227  | 1.01483E-05 | 0.007762245 |
| 764.919987 | 513.562527  | 1.15904E-05 | 0.008865722 |
| 764.959987 | 667.544449  | 1.50655E-05 | 0.011524542 |
| 764.999987 | 1012.469893 | 2.285E-05   | 0.017480277 |
| 765.039987 | 1481.018258 | 3.34245E-05 | 0.025571094 |
| 765.079987 | 1976.53996  | 4.46078E-05 | 0.0341285   |
| 765.119987 | 2370.623757 | 5.35017E-05 | 0.040935202 |
| 765.159987 | 2506.282283 | 5.65633E-05 | 0.043279974 |
| 765.199987 | 2299.388095 | 5.1894E-05  | 0.039709278 |
| 765.239987 | 1939.717639 | 4.37767E-05 | 0.033499701 |
| 765.279987 | 1572.888091 | 3.54979E-05 | 0.027165827 |
| 765.319987 | 1234.364369 | 2.78579E-05 | 0.021320196 |
| 765.359987 | 919.944883  | 2.07619E-05 | 0.015890308 |
| 765.399987 | 673.093763  | 1.51908E-05 | 0.011627029 |
| 765.439987 | 528.800526  | 1.19343E-05 | 0.009134984 |
| 765.479987 | 438.704014  | 9.90094E-06 | 0.00757897  |
| 765.519987 | 395.916638  | 8.93529E-06 | 0.006840141 |
| 765.559987 | 403.619784  | 9.10914E-06 | 0.00697359  |
| 765.599987 | 419.083205  | 9.45812E-06 | 0.00724114  |
| 765.639987 | 413.190713  | 9.32514E-06 | 0.007139699 |
| 765.679987 | 411.998488  | 9.29823E-06 | 0.00711947  |
| 765.719987 | 412.358561  | 9.30636E-06 | 0.007126065 |
| 765.759987 | 385.575495  | 8.7019E-06  | 0.006663568 |
| 765.799987 | 322.901878  | 7.28745E-06 | 0.005580726 |
| 765.839987 | 298.332467  | 6.73295E-06 | 0.005156361 |
| 765.879987 | 297.650775  | 6.71756E-06 | 0.005144847 |
| 765.919987 | 328.370238  | 7.41086E-06 | 0.005676125 |
| 765.959987 | 383.199315  | 8.64827E-06 | 0.006624232 |
| 765.999987 | 498.425473  | 1.12488E-05 | 0.008616557 |
| 766.039987 | 712.615937  | 1.60827E-05 | 0.012320029 |
| 766.079987 | 1018.501246 | 2.29862E-05 | 0.017609233 |
| 766.119987 | 1313.929966 | 2.96536E-05 | 0.022718192 |
| 766.159987 | 1519.076975 | 3.42835E-05 | 0.026266609 |
| 766.199987 | 1538.826593 | 3.47292E-05 | 0.026609492 |
| 766.239987 | 1408.320924 | 3.17838E-05 | 0.02435405  |
| 766.279987 | 1227.448321 | 2.77018E-05 | 0.021227334 |
| 766.319987 | 1011.823163 | 2.28354E-05 | 0.017499254 |
| 766.359987 | 766.984555  | 1.73098E-05 | 0.013265517 |
| 766.399987 | 588.63982   | 1.32848E-05 | 0.010181456 |



|            |             |             |             |
|------------|-------------|-------------|-------------|
| 766.439987 | 458.310888  | 1.03434E-05 | 0.007927625 |
| 766.479987 | 372.138626  | 8.39865E-06 | 0.006437397 |
| 766.519987 | 335.296035  | 7.56716E-06 | 0.005800383 |
| 766.559987 | 328.315325  | 7.40962E-06 | 0.005679918 |
| 766.599987 | 341.671842  | 7.71106E-06 | 0.005911297 |
| 766.639987 | 419.031667  | 9.45696E-06 | 0.007250085 |
| 766.679987 | 461.418747  | 1.04136E-05 | 0.007983882 |
| 766.719987 | 436.950725  | 9.86137E-06 | 0.007560909 |
| 766.759987 | 391.130792  | 8.82728E-06 | 0.006768403 |
| 766.799987 | 368.33174   | 8.31273E-06 | 0.006374205 |
| 766.839987 | 403.942914  | 9.11643E-06 | 0.006990842 |
| 766.879987 | 440.344282  | 9.93796E-06 | 0.00762122  |
| 766.919987 | 487.831894  | 1.10097E-05 | 0.008443549 |
| 766.959987 | 596.670087  | 1.3466E-05  | 0.010327893 |
| 766.999987 | 876.279135  | 1.97764E-05 | 0.015168498 |
| 767.039987 | 1256.201682 | 2.83507E-05 | 0.021746138 |
| 767.079987 | 1646.852687 | 3.71672E-05 | 0.028510193 |
| 767.119987 | 2042.879563 | 4.61049E-05 | 0.035368026 |
| 767.159987 | 2241.452272 | 5.05865E-05 | 0.038807905 |
| 767.199987 | 2233.797651 | 5.04137E-05 | 0.038677391 |
| 767.239987 | 2050.724878 | 4.6282E-05  | 0.035509404 |
| 767.279987 | 1702.124015 | 3.84146E-05 | 0.029474729 |
| 767.319987 | 1292.559493 | 2.91713E-05 | 0.022383696 |
| 767.359987 | 951.906286  | 2.14832E-05 | 0.016485347 |
| 767.399987 | 708.515745  | 1.59902E-05 | 0.01227089  |
| 767.439987 | 529.246082  | 1.19443E-05 | 0.009166569 |
| 767.479987 | 406.226204  | 9.16796E-06 | 0.007036226 |
| 767.519987 | 340.589572  | 7.68663E-06 | 0.005899644 |
| 767.559987 | 342.792628  | 7.73635E-06 | 0.005938114 |
| 767.599987 | 358.14286   | 8.08279E-06 | 0.006204346 |
| 767.639987 | 374.878132  | 8.46048E-06 | 0.006494601 |
| 767.679987 | 398.838841  | 9.00124E-06 | 0.00691007  |
| 767.719987 | 441.594199  | 9.96617E-06 | 0.007651225 |
| 767.759987 | 453.000345  | 1.02236E-05 | 0.007849261 |
| 767.799987 | 417.834643  | 9.42995E-06 | 0.007240312 |
| 767.839987 | 371.046827  | 8.37401E-06 | 0.0064299   |
| 767.879987 | 345.765377  | 7.80344E-06 | 0.005992108 |
| 767.919987 | 349.374924  | 7.88491E-06 | 0.006054976 |
| 767.959987 | 404.854432  | 9.137E-06   | 0.007016851 |
| 767.999987 | 511.345859  | 1.15404E-05 | 0.008862999 |
| 768.039987 | 682.644573  | 1.54063E-05 | 0.011832683 |
| 768.079987 | 911.398835  | 2.0569E-05  | 0.015798639 |
| 768.119987 | 1157.016457 | 2.61122E-05 | 0.020057341 |
| 768.159987 | 1331.760595 | 3.0056E-05  | 0.023087802 |
| 768.199987 | 1346.055015 | 3.03786E-05 | 0.02333683  |
| 768.239987 | 1225.17874  | 2.76506E-05 | 0.021242279 |

|            |             |             |             |
|------------|-------------|-------------|-------------|
| 768.279987 | 1075.785104 | 2.4279E-05  | 0.018653048 |
| 768.319987 | 931.198139  | 2.10158E-05 | 0.016146894 |
| 768.359987 | 767.448811  | 1.73203E-05 | 0.013308188 |
| 768.399987 | 624.261479  | 1.40887E-05 | 0.010825766 |
| 768.439987 | 498.158142  | 1.12427E-05 | 0.008639367 |
| 768.479987 | 404.432589  | 9.12748E-06 | 0.007014286 |
| 768.519987 | 347.93129   | 7.85232E-06 | 0.006034668 |
| 768.559987 | 356.786703  | 8.05218E-06 | 0.006188583 |
| 768.599987 | 391.9179    | 8.84504E-06 | 0.006798298 |
| 768.639987 | 442.988934  | 9.99764E-06 | 0.007684588 |
| 768.679987 | 467.857507  | 1.05589E-05 | 0.008116409 |
| 768.719987 | 464.923934  | 1.04927E-05 | 0.008065937 |
| 768.759987 | 427.567483  | 9.6496E-06  | 0.007418228 |
| 768.799987 | 370.094553  | 8.35252E-06 | 0.006421416 |
| 768.839987 | 335.662134  | 7.57543E-06 | 0.005824291 |
| 768.879987 | 324.906491  | 7.33269E-06 | 0.005637956 |
| 768.919987 | 345.445294  | 7.79622E-06 | 0.005994669 |
| 768.959987 | 417.011516  | 9.41137E-06 | 0.007236966 |
| 768.999987 | 593.392068  | 1.3392E-05  | 0.010298473 |
| 769.039987 | 833.16783   | 1.88034E-05 | 0.014460595 |
| 769.079987 | 1130.518021 | 2.55142E-05 | 0.019622474 |
| 769.119987 | 1428.341767 | 3.22357E-05 | 0.024793109 |
| 769.159987 | 1643.137072 | 3.70833E-05 | 0.028523002 |
| 769.199987 | 1766.213185 | 3.9861E-05  | 0.030661059 |
| 769.239987 | 1809.110887 | 4.08291E-05 | 0.031407386 |
| 769.279987 | 1707.409442 | 3.85339E-05 | 0.029643322 |
| 769.319987 | 1474.455426 | 3.32764E-05 | 0.025600204 |
| 769.359987 | 1144.406874 | 2.58277E-05 | 0.019870775 |
| 769.399987 | 799.52784   | 1.80442E-05 | 0.01388323  |
| 769.439987 | 568.888057  | 1.2839E-05  | 0.009878848 |
| 769.479987 | 416.10379   | 9.39088E-06 | 0.007226096 |
| 769.519987 | 352.417478  | 7.95357E-06 | 0.006120432 |
| 769.559987 | 330.386519  | 7.45636E-06 | 0.005738119 |
| 769.599987 | 336.682088  | 7.59845E-06 | 0.005847764 |
| 769.639987 | 363.515147  | 8.20403E-06 | 0.00631415  |
| 769.679987 | 399.336737  | 9.01247E-06 | 0.006936721 |
| 769.719987 | 392.957464  | 8.8685E-06  | 0.006826264 |
| 769.759987 | 357.705839  | 8.07292E-06 | 0.006214213 |
| 769.799987 | 323.096247  | 7.29183E-06 | 0.005613252 |
| 769.839987 | 288.189045  | 6.50403E-06 | 0.005007059 |
| 769.879987 | 276.390555  | 6.23775E-06 | 0.004802319 |
| 769.919987 | 307.93745   | 6.94972E-06 | 0.005350728 |
| 769.959987 | 348.415579  | 7.86325E-06 | 0.006054391 |
| 769.999987 | 407.347113  | 9.19326E-06 | 0.007078808 |
| 770.039987 | 534.507929  | 1.20631E-05 | 0.009289069 |
| 770.079987 | 756.12169   | 1.70646E-05 | 0.013141117 |

|            |             |             |             |
|------------|-------------|-------------|-------------|
| 770.119987 | 978.549437  | 2.20845E-05 | 0.017007713 |
| 770.159987 | 1154.273979 | 2.60504E-05 | 0.020062942 |
| 770.199987 | 1292.835111 | 2.91775E-05 | 0.022472501 |
| 770.239987 | 1320.93329  | 2.98116E-05 | 0.022962105 |
| 770.279987 | 1226.436239 | 2.7679E-05  | 0.021320547 |
| 770.319987 | 1050.275254 | 2.37032E-05 | 0.018259087 |
| 770.359987 | 853.242754  | 1.92565E-05 | 0.014834437 |
| 770.399987 | 669.812374  | 1.51167E-05 | 0.01164593  |
| 770.439987 | 518.292043  | 1.16971E-05 | 0.009011936 |
| 770.479987 | 403.601139  | 9.10872E-06 | 0.007018083 |
| 770.519987 | 325.027296  | 7.33541E-06 | 0.005652083 |
| 770.559987 | 306.776415  | 6.92352E-06 | 0.005334985 |
| 770.599987 | 317.687583  | 7.16977E-06 | 0.005525022 |
| 770.639987 | 359.025177  | 8.1027E-06  | 0.006244263 |
| 770.679987 | 401.937501  | 9.07117E-06 | 0.006990969 |
| 770.719987 | 420.524225  | 9.49065E-06 | 0.007314631 |
| 770.759987 | 420.024585  | 9.47937E-06 | 0.007306319 |
| 770.799987 | 396.339974  | 8.94484E-06 | 0.006894683 |
| 770.839987 | 363.186309  | 8.19661E-06 | 0.006318274 |
| 770.879987 | 344.253387  | 7.76932E-06 | 0.005989213 |
| 770.919987 | 374.988003  | 8.46296E-06 | 0.006524263 |
| 770.959987 | 479.777475  | 1.08279E-05 | 0.008347885 |
| 770.999987 | 659.250091  | 1.48784E-05 | 0.011471213 |
| 771.039987 | 981.366023  | 2.21481E-05 | 0.017077043 |
| 771.079987 | 1423.873106 | 3.21348E-05 | 0.024778526 |
| 771.119987 | 1861.290228 | 4.20067E-05 | 0.032392227 |
| 771.159987 | 2206.799772 | 4.98044E-05 | 0.038407158 |
| 771.199987 | 2356.447729 | 5.31817E-05 | 0.041013759 |
| 771.239987 | 2324.124839 | 5.24523E-05 | 0.040453281 |
| 771.279987 | 2045.94451  | 4.61741E-05 | 0.035613173 |
| 771.319987 | 1603.060573 | 3.61788E-05 | 0.027905466 |
| 771.359987 | 1194.123567 | 2.69497E-05 | 0.020787925 |
| 771.399987 | 864.733188  | 1.95158E-05 | 0.015054506 |
| 771.439987 | 633.922747  | 1.43068E-05 | 0.011036802 |
| 771.479987 | 474.423526  | 1.07071E-05 | 0.008260297 |
| 771.519987 | 396.347179  | 8.945E-06   | 0.006901249 |
| 771.559987 | 331.057066  | 7.4715E-06  | 0.005764708 |
| 771.599987 | 313.870429  | 7.08362E-06 | 0.00546572  |
| 771.639987 | 362.958128  | 8.19146E-06 | 0.006320858 |
| 771.679987 | 409.657198  | 9.24539E-06 | 0.007134484 |
| 771.719987 | 405.923441  | 9.16113E-06 | 0.007069825 |
| 771.759987 | 387.254362  | 8.73979E-06 | 0.006745021 |
| 771.799987 | 347.431957  | 7.84106E-06 | 0.006051726 |
| 771.839987 | 309.676392  | 6.98896E-06 | 0.005394363 |
| 771.879987 | 303.953852  | 6.85982E-06 | 0.005294954 |
| 771.919987 | 304.117428  | 6.86351E-06 | 0.005298078 |

|            |             |             |             |
|------------|-------------|-------------|-------------|
| 771.959987 | 352.606003  | 7.95783E-06 | 0.006143124 |
| 771.999987 | 481.000516  | 1.08555E-05 | 0.008380455 |
| 772.039987 | 653.946173  | 1.47587E-05 | 0.011394271 |
| 772.079987 | 864.355255  | 1.95073E-05 | 0.015061191 |
| 772.119987 | 1118.765638 | 2.5249E-05  | 0.019495244 |
| 772.159987 | 1462.321488 | 3.30026E-05 | 0.025483256 |
| 772.199987 | 1739.984629 | 3.9269E-05  | 0.030323544 |
| 772.239987 | 1836.901327 | 4.14563E-05 | 0.032014216 |
| 772.279987 | 1774.114525 | 4.00393E-05 | 0.030921545 |
| 772.319987 | 1564.069943 | 3.52989E-05 | 0.027262031 |
| 772.359987 | 1241.410967 | 2.80169E-05 | 0.021639145 |
| 772.399987 | 882.897772  | 1.99258E-05 | 0.015390667 |
| 772.439987 | 615.879959  | 1.38996E-05 | 0.01073657  |
| 772.479987 | 477.536709  | 1.07773E-05 | 0.008325278 |
| 772.519987 | 410.474616  | 9.26384E-06 | 0.007156502 |
| 772.559987 | 374.928368  | 8.46161E-06 | 0.006537102 |
| 772.599987 | 378.611831  | 8.54474E-06 | 0.006601667 |
| 772.639987 | 402.624649  | 9.08668E-06 | 0.00702073  |
| 772.679987 | 382.219319  | 8.62616E-06 | 0.006665259 |
| 772.719987 | 377.530907  | 8.52035E-06 | 0.006583842 |
| 772.759987 | 389.28681   | 8.78566E-06 | 0.006789207 |
| 772.799987 | 394.472045  | 8.90268E-06 | 0.006879995 |
| 772.839987 | 411.167259  | 9.27947E-06 | 0.007171547 |
| 772.879987 | 446.443928  | 1.00756E-05 | 0.007787243 |
| 772.919987 | 486.731307  | 1.09848E-05 | 0.008490408 |
| 772.959987 | 578.077679  | 1.30464E-05 | 0.010084351 |
| 772.999987 | 724.991887  | 1.63621E-05 | 0.01264787  |
| 773.039987 | 957.011462  | 2.15984E-05 | 0.016696439 |
| 773.079987 | 1285.319138 | 2.90079E-05 | 0.022425398 |
| 773.119987 | 1668.889258 | 3.76645E-05 | 0.029119182 |
| 773.159987 | 2010.520607 | 4.53746E-05 | 0.035081864 |
| 773.199987 | 2196.769698 | 4.9578E-05  | 0.038333734 |
| 773.239987 | 2217.241859 | 5.00401E-05 | 0.038692976 |
| 773.279987 | 2052.625952 | 4.63249E-05 | 0.035822125 |
| 773.319987 | 1700.740462 | 3.83833E-05 | 0.029682607 |
| 773.359987 | 1292.054981 | 2.91599E-05 | 0.022551085 |
| 773.399987 | 944.548979  | 2.13172E-05 | 0.016486687 |
| 773.439987 | 696.28368   | 1.57142E-05 | 0.012153954 |
| 773.479987 | 503.733435  | 1.13686E-05 | 0.008793355 |
| 773.519987 | 394.56868   | 8.90487E-06 | 0.006888091 |
| 773.559987 | 337.104451  | 7.60798E-06 | 0.005885227 |
| 773.599987 | 319.801936  | 7.21748E-06 | 0.005583446 |
| 773.639987 | 356.685847  | 8.0499E-06  | 0.006227727 |
| 773.679987 | 393.549787  | 8.88187E-06 | 0.006871725 |
| 773.719987 | 399.361899  | 9.01304E-06 | 0.006973571 |
| 773.759987 | 392.934009  | 8.86797E-06 | 0.006861683 |

|            |             |             |             |
|------------|-------------|-------------|-------------|
| 773.799987 | 361.18467   | 8.15143E-06 | 0.00630758  |
| 773.839987 | 321.147253  | 7.24785E-06 | 0.005608673 |
| 773.879987 | 290.855642  | 6.56421E-06 | 0.005079908 |
| 773.919987 | 296.601488  | 6.69388E-06 | 0.005180529 |
| 773.959987 | 326.210875  | 7.36213E-06 | 0.00569799  |
| 773.999987 | 408.69353   | 9.22364E-06 | 0.0071391   |
| 774.039987 | 589.308261  | 1.32999E-05 | 0.010294629 |
| 774.079987 | 832.655769  | 1.87919E-05 | 0.014546419 |
| 774.119987 | 1073.176579 | 2.42201E-05 | 0.018749264 |
| 774.159987 | 1208.409504 | 2.72721E-05 | 0.021112984 |
| 774.199987 | 1291.377703 | 2.91446E-05 | 0.022563746 |
| 774.239987 | 1341.282293 | 3.02709E-05 | 0.02343692  |
| 774.279987 | 1282.553088 | 2.89454E-05 | 0.022411872 |
| 774.319987 | 1085.832635 | 2.45057E-05 | 0.018975277 |
| 774.359987 | 890.40098   | 2.00951E-05 | 0.015560849 |
| 774.399987 | 715.151959  | 1.614E-05   | 0.012498803 |
| 774.439987 | 555.054925  | 1.25268E-05 | 0.009701268 |
| 774.479987 | 420.774536  | 9.4963E-06  | 0.007354691 |
| 774.519987 | 357.819569  | 8.07549E-06 | 0.006254628 |
| 774.559987 | 364.757735  | 8.23207E-06 | 0.006376235 |
| 774.599987 | 395.488816  | 8.92563E-06 | 0.006913794 |
| 774.639987 | 428.981209  | 9.68151E-06 | 0.007499684 |
| 774.679987 | 451.356339  | 1.01865E-05 | 0.007891265 |
| 774.719987 | 464.461596  | 1.04823E-05 | 0.00812081  |
| 774.759987 | 438.692105  | 9.90067E-06 | 0.007670643 |
| 774.799987 | 410.349364  | 9.26101E-06 | 0.007175433 |
| 774.839987 | 403.672191  | 9.11032E-06 | 0.00705904  |
| 774.879987 | 400.409632  | 9.03669E-06 | 0.007002348 |
| 774.919987 | 410.465357  | 9.26363E-06 | 0.007178573 |
| 774.959987 | 451.445841  | 1.01885E-05 | 0.007895683 |
| 774.999987 | 618.043934  | 1.39484E-05 | 0.010810003 |
| 775.039987 | 874.329096  | 1.97324E-05 | 0.015293391 |
| 775.079987 | 1225.883941 | 2.76665E-05 | 0.021443745 |
| 775.119987 | 1623.021652 | 3.66293E-05 | 0.028392132 |
| 775.159987 | 1968.15145  | 4.44184E-05 | 0.034431395 |
| 775.199987 | 2210.518186 | 4.98883E-05 | 0.038673422 |
| 775.239987 | 2194.448874 | 4.95257E-05 | 0.038394268 |
| 775.279987 | 1967.509005 | 4.44039E-05 | 0.034425484 |
| 775.319987 | 1655.355867 | 3.73591E-05 | 0.028965238 |
| 775.359987 | 1279.920662 | 2.8886E-05  | 0.022397069 |
| 775.399987 | 926.673235  | 2.09137E-05 | 0.016216501 |
| 775.439987 | 647.389801  | 1.46107E-05 | 0.01132971  |
| 775.479987 | 466.913548  | 1.05376E-05 | 0.008171689 |
| 775.519987 | 362.982736  | 8.19201E-06 | 0.006353071 |
| 775.559987 | 331.019539  | 7.47065E-06 | 0.005793937 |
| 775.599987 | 333.074279  | 7.51702E-06 | 0.005830203 |

|            |             |             |             |
|------------|-------------|-------------|-------------|
| 775.639987 | 363.438327  | 8.2023E-06  | 0.006362029 |
| 775.679987 | 414.326334  | 9.35077E-06 | 0.007253204 |
| 775.719987 | 407.793552  | 9.20333E-06 | 0.007139209 |
| 775.759987 | 347.219291  | 7.83626E-06 | 0.006079054 |
| 775.799987 | 304.526102  | 6.87273E-06 | 0.005331864 |
| 775.839987 | 286.039954  | 6.45552E-06 | 0.005008453 |
| 775.879987 | 274.429771  | 6.1935E-06  | 0.004805411 |
| 775.919987 | 279.989876  | 6.31898E-06 | 0.004903024 |
| 775.959987 | 336.549779  | 7.59546E-06 | 0.005893773 |
| 775.999987 | 435.665731  | 9.83237E-06 | 0.007629918 |
| 776.039987 | 585.805005  | 1.32208E-05 | 0.010259872 |
| 776.079987 | 835.410774  | 1.88541E-05 | 0.014632257 |
| 776.119987 | 1147.005086 | 2.58863E-05 | 0.02009088  |
| 776.159987 | 1422.432415 | 3.21023E-05 | 0.024916535 |
| 776.199987 | 1574.444207 | 3.5533E-05  | 0.027580724 |
| 776.239987 | 1512.117579 | 3.41264E-05 | 0.026490267 |
| 776.279987 | 1328.713562 | 2.99872E-05 | 0.023278474 |
| 776.319987 | 1148.514866 | 2.59204E-05 | 0.02012251  |
| 776.359987 | 950.524668  | 2.1452E-05  | 0.016654488 |
| 776.399987 | 720.2509    | 1.62551E-05 | 0.012620428 |
| 776.439987 | 510.083294  | 1.15119E-05 | 0.008938276 |
| 776.479987 | 392.794875  | 8.86483E-06 | 0.006883366 |
| 776.519987 | 370.704016  | 8.36627E-06 | 0.006496578 |
| 776.559987 | 363.50743   | 8.20386E-06 | 0.006370787 |
| 776.599987 | 368.421347  | 8.31476E-06 | 0.00645724  |
| 776.639987 | 383.484988  | 8.65472E-06 | 0.006721603 |
| 776.679987 | 404.216778  | 9.12261E-06 | 0.007085348 |
| 776.719987 | 419.717358  | 9.47244E-06 | 0.00735743  |
| 776.759987 | 429.449568  | 9.69208E-06 | 0.007528419 |
| 776.799987 | 407.518818  | 9.19713E-06 | 0.007144332 |
| 776.839987 | 364.103551  | 8.21731E-06 | 0.006383535 |
| 776.879987 | 382.933145  | 8.64227E-06 | 0.006714005 |
| 776.919987 | 408.180363  | 9.21206E-06 | 0.007157035 |
| 776.959987 | 467.641238  | 1.0554E-05  | 0.008200045 |
| 776.999987 | 624.322901  | 1.40901E-05 | 0.010948006 |
| 777.039987 | 870.516406  | 1.96463E-05 | 0.015265994 |
| 777.079987 | 1192.981241 | 2.69239E-05 | 0.020922043 |
| 777.119987 | 1601.629122 | 3.61465E-05 | 0.028090197 |
| 777.159987 | 1909.854793 | 4.31028E-05 | 0.033497742 |
| 777.199987 | 2020.254828 | 4.55943E-05 | 0.035435919 |
| 777.239987 | 1994.143292 | 4.5005E-05  | 0.034979714 |
| 777.279987 | 1860.853388 | 4.19969E-05 | 0.032643326 |
| 777.319987 | 1618.359844 | 3.65241E-05 | 0.028390934 |
| 777.359987 | 1252.078594 | 2.82577E-05 | 0.021966382 |
| 777.399987 | 907.626912  | 2.04839E-05 | 0.015924164 |
| 777.439987 | 637.493571  | 1.43873E-05 | 0.011185295 |

|            |             |             |             |
|------------|-------------|-------------|-------------|
| 777.479987 | 441.134574  | 9.95579E-06 | 0.00774043  |
| 777.519987 | 350.547453  | 7.91137E-06 | 0.006151247 |
| 777.559987 | 331.455548  | 7.48049E-06 | 0.00581653  |
| 777.599987 | 342.479046  | 7.72928E-06 | 0.006010284 |
| 777.639987 | 358.329856  | 8.08701E-06 | 0.006288779 |
| 777.679987 | 384.012435  | 8.66663E-06 | 0.006739861 |
| 777.719987 | 387.981528  | 8.7562E-06  | 0.006809874 |
| 777.759987 | 353.718908  | 7.98294E-06 | 0.006208814 |
| 777.799987 | 334.967251  | 7.55974E-06 | 0.005879969 |
| 777.839987 | 316.523719  | 7.1435E-06  | 0.0055565   |
| 777.879987 | 310.250718  | 7.00193E-06 | 0.005446659 |
| 777.919987 | 342.133483  | 7.72148E-06 | 0.006006691 |
| 777.959987 | 382.521058  | 8.63297E-06 | 0.006716103 |
| 777.999987 | 465.688247  | 1.05099E-05 | 0.008176729 |
| 778.039987 | 607.934713  | 1.37202E-05 | 0.010674895 |
| 778.079987 | 811.563828  | 1.83159E-05 | 0.014251208 |
| 778.119987 | 1084.173765 | 2.44683E-05 | 0.019039267 |
| 778.159987 | 1337.880088 | 3.01941E-05 | 0.023495833 |
| 778.199987 | 1448.522314 | 3.26911E-05 | 0.025440238 |
| 778.239987 | 1458.824785 | 3.29236E-05 | 0.025622496 |
| 778.279987 | 1420.486786 | 3.20584E-05 | 0.024950418 |
| 778.319987 | 1232.529643 | 2.78165E-05 | 0.02165012  |
| 778.359987 | 980.129644  | 2.21202E-05 | 0.017217448 |
| 778.399987 | 715.003623  | 1.61366E-05 | 0.012560757 |
| 778.439987 | 504.180025  | 1.13786E-05 | 0.008857589 |
| 778.479987 | 398.629386  | 8.99651E-06 | 0.007003603 |
| 778.519987 | 355.427209  | 8.0215E-06  | 0.006244896 |
| 778.559987 | 343.730527  | 7.75752E-06 | 0.006039694 |
| 778.599987 | 359.405276  | 8.11128E-06 | 0.00631544  |
| 778.639987 | 390.090282  | 8.80379E-06 | 0.006854986 |
| 778.679987 | 426.279218  | 9.62053E-06 | 0.007491313 |
| 778.719987 | 443.084301  | 9.9998E-06  | 0.007787041 |
| 778.759987 | 418.684949  | 9.44914E-06 | 0.007358609 |
| 778.799987 | 371.418151  | 8.38239E-06 | 0.006528205 |
| 778.839987 | 341.08286   | 7.69777E-06 | 0.005995327 |
| 778.879987 | 350.759183  | 7.91615E-06 | 0.006165728 |
| 778.919987 | 369.01999   | 8.32827E-06 | 0.006487054 |
| 778.959987 | 451.317034  | 1.01856E-05 | 0.007934172 |
| 778.999987 | 625.816149  | 1.41238E-05 | 0.011002439 |
| 779.039987 | 848.96368   | 1.91599E-05 | 0.01492635  |
| 779.079987 | 1153.940802 | 2.60428E-05 | 0.020289453 |
| 779.119987 | 1443.25173  | 3.25722E-05 | 0.025377637 |
| 779.159987 | 1639.858011 | 3.70093E-05 | 0.028836174 |
| 779.199987 | 1752.814938 | 3.95586E-05 | 0.030824054 |
| 779.239987 | 1721.893746 | 3.88607E-05 | 0.030281845 |
| 779.279987 | 1513.359178 | 3.41544E-05 | 0.026615847 |

|            |             |             |             |
|------------|-------------|-------------|-------------|
| 779.319987 | 1203.53302  | 2.71621E-05 | 0.021167939 |
| 779.359987 | 895.837492  | 2.02178E-05 | 0.015756948 |
| 779.399987 | 657.771575  | 1.4845E-05  | 0.011570184 |
| 779.439987 | 480.441624  | 1.08429E-05 | 0.008451388 |
| 779.479987 | 375.076755  | 8.46496E-06 | 0.006598267 |
| 779.519987 | 319.374026  | 7.20783E-06 | 0.005618645 |
| 779.559987 | 307.979494  | 6.95067E-06 | 0.005418463 |
| 779.599987 | 349.644158  | 7.89098E-06 | 0.006151809 |
| 779.639987 | 384.152043  | 8.66978E-06 | 0.006759304 |
| 779.679987 | 368.795221  | 8.32319E-06 | 0.006489428 |
| 779.719987 | 362.085737  | 8.17177E-06 | 0.006371693 |
| 779.759987 | 374.549985  | 8.45307E-06 | 0.006591367 |
| 779.799987 | 361.830218  | 8.166E-06   | 0.00636785  |
| 779.839987 | 339.740946  | 7.66748E-06 | 0.005979407 |
| 779.879987 | 327.568825  | 7.39277E-06 | 0.005765475 |
| 779.919987 | 323.753203  | 7.30666E-06 | 0.005698609 |
| 779.959987 | 366.026414  | 8.26071E-06 | 0.00644302  |
| 779.999987 | 447.051693  | 1.00893E-05 | 0.00786968  |
| 780.039987 | 597.642968  | 1.3488E-05  | 0.010521155 |
| 780.079987 | 812.943756  | 1.8347E-05  | 0.014312134 |
| 780.119987 | 1033.406277 | 2.33225E-05 | 0.01819438  |
| 780.159987 | 1200.852925 | 2.71016E-05 | 0.021143567 |
| 780.199987 | 1274.433649 | 2.87622E-05 | 0.022440262 |
| 780.239987 | 1209.257162 | 2.72912E-05 | 0.021293724 |
| 780.279987 | 1094.271985 | 2.46962E-05 | 0.019269946 |
| 780.319987 | 955.827664  | 2.15717E-05 | 0.016832828 |
| 780.359987 | 760.708506  | 1.71681E-05 | 0.013397323 |
| 780.399987 | 563.715631  | 1.27223E-05 | 0.009928464 |
| 780.439987 | 412.014411  | 9.29859E-06 | 0.007256993 |
| 780.479987 | 339.754456  | 7.66778E-06 | 0.005984553 |
| 780.519987 | 323.331588  | 7.29714E-06 | 0.005695566 |
| 780.559987 | 349.735797  | 7.89305E-06 | 0.006160999 |
| 780.599987 | 372.870518  | 8.41517E-06 | 0.00656888  |
| 780.639987 | 390.069571  | 8.80333E-06 | 0.006872229 |
| 780.679987 | 430.260308  | 9.71038E-06 | 0.007580696 |
| 780.719987 | 430.240737  | 9.70993E-06 | 0.00758074  |
| 780.759987 | 395.599461  | 8.92813E-06 | 0.006970726 |
| 780.799987 | 365.580341  | 8.25064E-06 | 0.006442099 |
| 780.839987 | 349.673851  | 7.89165E-06 | 0.006162117 |
| 780.879987 | 361.351331  | 8.1552E-06  | 0.00636823  |
| 780.919987 | 398.682527  | 8.99771E-06 | 0.007026491 |
| 780.959987 | 496.850013  | 1.12132E-05 | 0.00875707  |
| 780.999987 | 655.482966  | 1.47933E-05 | 0.011553596 |
| 781.039987 | 882.463792  | 1.9916E-05  | 0.015555176 |
| 781.079987 | 1183.153242 | 2.67021E-05 | 0.020856492 |
| 781.119987 | 1463.390995 | 3.30267E-05 | 0.025797813 |



|            |             |             |             |
|------------|-------------|-------------|-------------|
| 781.159987 | 1649.002822 | 3.72157E-05 | 0.029071413 |
| 781.199987 | 1725.233801 | 3.89361E-05 | 0.030416899 |
| 781.239987 | 1694.396686 | 3.82402E-05 | 0.029874752 |
| 781.279987 | 1531.029695 | 3.45532E-05 | 0.02699573  |
| 781.319987 | 1239.686816 | 2.7978E-05  | 0.021859774 |
| 781.359987 | 953.854107  | 2.15272E-05 | 0.01682046  |
| 781.399987 | 700.048621  | 1.57991E-05 | 0.012345434 |
| 781.439987 | 502.239198  | 1.13348E-05 | 0.008857497 |
| 781.479987 | 373.7751    | 8.43558E-06 | 0.00659224  |
| 781.519987 | 330.625881  | 7.46177E-06 | 0.005831519 |
| 781.559987 | 325.570814  | 7.34768E-06 | 0.005742653 |
| 781.599987 | 344.144282  | 7.76686E-06 | 0.006070575 |
| 781.639987 | 387.770094  | 8.75143E-06 | 0.006840468 |
| 781.679987 | 414.919126  | 9.36415E-06 | 0.007319766 |
| 781.719987 | 390.451496  | 8.81195E-06 | 0.006888475 |
| 781.759987 | 359.44608   | 8.1122E-06  | 0.006341791 |
| 781.799987 | 351.927316  | 7.94251E-06 | 0.006209454 |
| 781.839987 | 324.414112  | 7.32157E-06 | 0.0057243   |
| 781.879987 | 295.414439  | 6.66709E-06 | 0.005212866 |
| 781.919987 | 288.092369  | 6.50184E-06 | 0.005083921 |
| 781.959987 | 329.747264  | 7.44194E-06 | 0.005819297 |
| 781.999987 | 426.325454  | 9.62157E-06 | 0.007524069 |
| 782.039987 | 605.215248  | 1.36589E-05 | 0.010681779 |
| 782.079987 | 836.552346  | 1.88798E-05 | 0.01476553  |
| 782.119987 | 1051.345882 | 2.37274E-05 | 0.018557683 |
| 782.159987 | 1180.79317  | 2.66489E-05 | 0.02084367  |
| 782.199987 | 1221.028136 | 2.75569E-05 | 0.02155501  |
| 782.239987 | 1209.543833 | 2.72977E-05 | 0.021353368 |
| 782.279987 | 1122.103295 | 2.53243E-05 | 0.0198107   |
| 782.319987 | 946.577127  | 2.13629E-05 | 0.016712645 |
| 782.359987 | 776.93138   | 1.75343E-05 | 0.013718103 |
| 782.399987 | 612.06603   | 1.38135E-05 | 0.010807665 |
| 782.439987 | 447.252679  | 1.00939E-05 | 0.007897848 |
| 782.479987 | 358.699488  | 8.09535E-06 | 0.006334448 |
| 782.519987 | 336.014934  | 7.58339E-06 | 0.005934153 |
| 782.559987 | 333.091991  | 7.51742E-06 | 0.005882834 |
| 782.599987 | 353.805999  | 7.98491E-06 | 0.006248989 |
| 782.639987 | 400.14257   | 9.03066E-06 | 0.007067756 |
| 782.679987 | 440.346145  | 9.938E-06   | 0.007778273 |
| 782.719987 | 426.526073  | 9.6261E-06  | 0.00753454  |
| 782.759987 | 370.704003  | 8.36627E-06 | 0.006548784 |
| 782.799987 | 358.459885  | 8.08994E-06 | 0.006332805 |
| 782.839987 | 382.431393  | 8.63094E-06 | 0.006756648 |
| 782.879987 | 387.130135  | 8.73699E-06 | 0.006840013 |
| 782.919987 | 428.115325  | 9.66197E-06 | 0.007564547 |
| 782.959987 | 519.150733  | 1.17165E-05 | 0.009173558 |

|            |             |             |             |
|------------|-------------|-------------|-------------|
| 782.999987 | 613.696623  | 1.38503E-05 | 0.010844767 |
| 783.039987 | 789.401215  | 1.78157E-05 | 0.013950394 |
| 783.079987 | 1097.112387 | 2.47603E-05 | 0.019389294 |
| 783.119987 | 1425.463416 | 3.21707E-05 | 0.025193537 |
| 783.159987 | 1666.373679 | 3.76077E-05 | 0.029452872 |
| 783.199987 | 1780.062493 | 4.01735E-05 | 0.031463909 |
| 783.239987 | 1780.112929 | 4.01747E-05 | 0.031466407 |
| 783.279987 | 1598.875145 | 3.60844E-05 | 0.028264177 |
| 783.319987 | 1277.044923 | 2.88211E-05 | 0.022576163 |
| 783.359987 | 963.710905  | 2.17496E-05 | 0.017037776 |
| 783.399987 | 701.521262  | 1.58324E-05 | 0.012403069 |
| 783.439987 | 518.195563  | 1.1695E-05  | 0.009162293 |
| 783.479987 | 387.083846  | 8.73594E-06 | 0.006844437 |
| 783.519987 | 314.750534  | 7.10348E-06 | 0.005565719 |
| 783.559987 | 303.531816  | 6.85029E-06 | 0.005367613 |
| 783.599987 | 318.658578  | 7.19168E-06 | 0.005635401 |
| 783.639987 | 353.539777  | 7.9789E-06  | 0.006252585 |
| 783.679987 | 368.868533  | 8.32485E-06 | 0.006524018 |
| 783.719987 | 368.011691  | 8.30551E-06 | 0.006509195 |
| 783.759987 | 357.958027  | 8.07861E-06 | 0.006331694 |
| 783.799987 | 341.306455  | 7.70281E-06 | 0.006037463 |
| 783.839987 | 303.429233  | 6.84798E-06 | 0.005367717 |
| 783.879987 | 311.732422  | 7.03537E-06 | 0.005514883 |
| 783.919987 | 355.43205   | 8.02161E-06 | 0.006288298 |
| 783.959987 | 368.168661  | 8.30905E-06 | 0.006513966 |
| 783.999987 | 418.685211  | 9.44914E-06 | 0.007408127 |
| 784.039987 | 559.517446  | 1.26275E-05 | 0.009900488 |
| 784.079987 | 771.091308  | 1.74025E-05 | 0.013644918 |
| 784.119987 | 960.867052  | 2.16854E-05 | 0.01700398  |
| 784.159987 | 1116.547744 | 2.51989E-05 | 0.019759991 |
| 784.199987 | 1205.79854  | 2.72132E-05 | 0.021340586 |
| 784.239987 | 1195.4759   | 2.69802E-05 | 0.021158972 |
| 784.279987 | 1130.955331 | 2.55241E-05 | 0.02001803  |
| 784.319987 | 1013.222025 | 2.2867E-05  | 0.017935053 |
| 784.359987 | 867.278672  | 1.95733E-05 | 0.015352491 |
| 784.399987 | 737.685276  | 1.66485E-05 | 0.013059106 |
| 784.439987 | 579.634467  | 1.30815E-05 | 0.010261685 |
| 784.479987 | 456.505748  | 1.03027E-05 | 0.008082261 |
| 784.519987 | 409.077458  | 9.23231E-06 | 0.00724293  |
| 784.559987 | 395.790176  | 8.93243E-06 | 0.00700803  |
| 784.599987 | 407.060239  | 9.18678E-06 | 0.00720795  |
| 784.639987 | 431.379719  | 9.73564E-06 | 0.007638972 |
| 784.679987 | 451.881431  | 1.01983E-05 | 0.008002429 |
| 784.719987 | 437.951822  | 9.88396E-06 | 0.007756143 |
| 784.759987 | 395.54134   | 8.92682E-06 | 0.007005409 |
| 784.799987 | 348.66844   | 7.86896E-06 | 0.006175561 |

|            |             |             |             |
|------------|-------------|-------------|-------------|
| 784.839987 | 326.394615  | 7.36627E-06 | 0.005781345 |
| 784.879987 | 329.37599   | 7.43356E-06 | 0.00583445  |
| 784.919987 | 379.107834  | 8.55594E-06 | 0.006715725 |
| 784.959987 | 461.312253  | 1.04112E-05 | 0.008172356 |
| 784.999987 | 590.226609  | 1.33206E-05 | 0.010456665 |
| 785.039987 | 762.86535   | 1.72168E-05 | 0.013515883 |
| 785.079987 | 1013.646944 | 2.28766E-05 | 0.017959961 |
| 785.119987 | 1329.64981  | 3.00083E-05 | 0.023560151 |
| 785.159987 | 1580.10616  | 3.56608E-05 | 0.027999429 |
| 785.199987 | 1685.219722 | 3.80331E-05 | 0.02986356  |
| 785.239987 | 1696.526339 | 3.82882E-05 | 0.030065454 |
| 785.279987 | 1619.326237 | 3.65459E-05 | 0.028698793 |
| 785.319987 | 1363.171769 | 3.07649E-05 | 0.024160282 |
| 785.359987 | 1004.253391 | 2.26646E-05 | 0.01779987  |
| 785.399987 | 734.292027  | 1.65719E-05 | 0.013015608 |
| 785.439987 | 539.449513  | 1.21746E-05 | 0.009562437 |
| 785.479987 | 424.04805   | 9.57017E-06 | 0.00751718  |
| 785.519987 | 348.881459  | 7.87377E-06 | 0.006185003 |
| 785.559987 | 297.608378  | 6.71661E-06 | 0.005276297 |
| 785.599987 | 289.09658   | 6.52451E-06 | 0.005125653 |
| 785.639987 | 304.066501  | 6.86236E-06 | 0.005391342 |
| 785.679987 | 333.504656  | 7.52674E-06 | 0.005913605 |
| 785.719987 | 362.490114  | 8.1809E-06  | 0.006427894 |
| 785.759987 | 362.782048  | 8.18749E-06 | 0.006433399 |
| 785.799987 | 339.95377   | 7.67228E-06 | 0.00602888  |
| 785.839987 | 319.423303  | 7.20894E-06 | 0.005665073 |
| 785.879987 | 288.367514  | 6.50805E-06 | 0.005114549 |
| 785.919987 | 285.275093  | 6.43826E-06 | 0.005059958 |
| 785.959987 | 313.094218  | 7.0661E-06  | 0.005553672 |
| 785.999987 | 370.299014  | 8.35713E-06 | 0.006568706 |
| 786.039987 | 497.254566  | 1.12223E-05 | 0.00882121  |
| 786.079987 | 684.782099  | 1.54546E-05 | 0.012148535 |
| 786.119987 | 852.891591  | 1.92486E-05 | 0.01513169  |
| 786.159987 | 1012.615509 | 2.28533E-05 | 0.017966367 |
| 786.199987 | 1126.817097 | 2.54307E-05 | 0.01999361  |
| 786.239987 | 1185.124652 | 2.67466E-05 | 0.021029256 |
| 786.279987 | 1143.258319 | 2.58017E-05 | 0.020287398 |
| 786.319987 | 994.342937  | 2.24409E-05 | 0.017645756 |
| 786.359987 | 797.147355  | 1.79905E-05 | 0.014147014 |
| 786.399987 | 628.726801  | 1.41895E-05 | 0.011158613 |
| 786.439987 | 470.512715  | 1.06188E-05 | 0.008351062 |
| 786.479987 | 366.398488  | 8.2691E-06  | 0.006503484 |
| 786.519987 | 328.578412  | 7.41556E-06 | 0.005832484 |
| 786.559987 | 358.743778  | 8.09635E-06 | 0.006368263 |
| 786.599987 | 392.390162  | 8.8557E-06  | 0.006965893 |
| 786.639987 | 431.421435  | 9.73658E-06 | 0.007659184 |

|            |             |             |             |
|------------|-------------|-------------|-------------|
| 786.679987 | 502.238937  | 1.13348E-05 | 0.008916886 |
| 786.719987 | 497.226194  | 1.12217E-05 | 0.008828338 |
| 786.759987 | 449.004386  | 1.01334E-05 | 0.007972556 |
| 786.799987 | 398.878082  | 9.00212E-06 | 0.00708287  |
| 786.839987 | 373.212587  | 8.42289E-06 | 0.006627465 |
| 786.879987 | 409.684254  | 9.246E-06   | 0.007275495 |
| 786.919987 | 461.202111  | 1.04087E-05 | 0.008190806 |
| 786.959987 | 519.906215  | 1.17336E-05 | 0.009233842 |
| 786.999987 | 664.24149   | 1.4991E-05  | 0.011797921 |
| 787.039987 | 909.25793   | 2.05207E-05 | 0.0161506   |
| 787.079987 | 1232.263346 | 2.78105E-05 | 0.021889062 |
| 787.119987 | 1494.381615 | 3.37261E-05 | 0.026546496 |
| 787.159987 | 1717.530396 | 3.87623E-05 | 0.030512107 |
| 787.199987 | 1869.975882 | 4.22028E-05 | 0.033222005 |
| 787.239987 | 1892.026897 | 4.27004E-05 | 0.033615472 |
| 787.279987 | 1691.986322 | 3.81858E-05 | 0.030062896 |
| 787.319987 | 1363.73311  | 3.07776E-05 | 0.024231786 |
| 787.359987 | 1041.055781 | 2.34952E-05 | 0.018499164 |
| 787.399987 | 777.196752  | 1.75402E-05 | 0.013811191 |
| 787.439987 | 580.073036  | 1.30914E-05 | 0.010308724 |
| 787.479987 | 425.41139   | 9.60094E-06 | 0.00756055  |
| 787.519987 | 348.788853  | 7.87168E-06 | 0.006199104 |
| 787.559987 | 312.67023   | 7.05653E-06 | 0.005557442 |
| 787.599987 | 314.748473  | 7.10343E-06 | 0.005594665 |
| 787.639987 | 346.353414  | 7.81671E-06 | 0.006156757 |
| 787.679987 | 381.774175  | 8.61611E-06 | 0.006786738 |
| 787.719987 | 389.630739  | 8.79342E-06 | 0.006926755 |
| 787.759987 | 356.881688  | 8.05432E-06 | 0.006344873 |
| 787.799987 | 324.226094  | 7.31733E-06 | 0.005764594 |
| 787.839987 | 281.097328  | 6.34398E-06 | 0.004998037 |
| 787.879987 | 256.271194  | 5.78368E-06 | 0.004556849 |
| 787.919987 | 275.898417  | 6.22664E-06 | 0.004906096 |
| 787.959987 | 332.483716  | 7.50369E-06 | 0.005912611 |
| 787.999987 | 415.504949  | 9.37737E-06 | 0.007389366 |
| 788.039987 | 574.908296  | 1.29749E-05 | 0.010224724 |
| 788.079987 | 830.585478  | 1.87452E-05 | 0.014772683 |
| 788.119987 | 1067.591511 | 2.40941E-05 | 0.018989005 |
| 788.159987 | 1231.324966 | 2.77893E-05 | 0.021902406 |
| 788.199987 | 1288.557722 | 2.9081E-05  | 0.022921607 |
| 788.239987 | 1277.002703 | 2.88202E-05 | 0.022717212 |
| 788.279987 | 1175.571233 | 2.6531E-05  | 0.020913861 |
| 788.319987 | 1011.191518 | 2.28212E-05 | 0.017990396 |
| 788.359987 | 830.165734  | 1.87357E-05 | 0.014770464 |
| 788.399987 | 634.36819   | 1.43168E-05 | 0.01128737  |
| 788.439987 | 482.748111  | 1.0895E-05  | 0.008590016 |
| 788.479987 | 384.363483  | 8.67455E-06 | 0.006839708 |

|            |             |             |             |
|------------|-------------|-------------|-------------|
| 788.519987 | 349.564223  | 7.88918E-06 | 0.006220774 |
| 788.559987 | 369.070475  | 8.32941E-06 | 0.006568237 |
| 788.599987 | 373.344061  | 8.42586E-06 | 0.006644629 |
| 788.639987 | 373.620433  | 8.43209E-06 | 0.006649886 |
| 788.679987 | 419.874998  | 9.47599E-06 | 0.007473527 |
| 788.719987 | 454.684319  | 1.02616E-05 | 0.008093523 |
| 788.759987 | 427.961447  | 9.65849E-06 | 0.007618233 |
| 788.799987 | 424.291434  | 9.57567E-06 | 0.007553286 |
| 788.839987 | 418.558756  | 9.44629E-06 | 0.00745161  |
| 788.879987 | 413.07717   | 9.32258E-06 | 0.007354394 |
| 788.919987 | 444.498844  | 1.00317E-05 | 0.007914224 |
| 788.959987 | 531.092323  | 1.1986E-05  | 0.009456485 |
| 788.999987 | 684.752504  | 1.54539E-05 | 0.012193135 |
| 789.039987 | 924.955449  | 2.0875E-05  | 0.016471175 |
| 789.079987 | 1238.111917 | 2.79425E-05 | 0.022048837 |
| 789.119987 | 1531.844503 | 3.45716E-05 | 0.027281138 |
| 789.159987 | 1736.612956 | 3.91929E-05 | 0.030929496 |
| 789.199987 | 1801.606494 | 4.06597E-05 | 0.032088673 |
| 789.239987 | 1749.820055 | 3.9491E-05  | 0.031167877 |
| 789.279987 | 1591.56486  | 3.59194E-05 | 0.028350465 |
| 789.319987 | 1355.793223 | 3.05984E-05 | 0.024151901 |
| 789.359987 | 1105.310897 | 2.49453E-05 | 0.019690843 |
| 789.399987 | 871.945489  | 1.96786E-05 | 0.015534283 |
| 789.439987 | 637.751866  | 1.43932E-05 | 0.011362545 |
| 789.479987 | 455.428395  | 1.02784E-05 | 0.008114579 |
| 789.519987 | 356.233141  | 8.03969E-06 | 0.006347493 |
| 789.559987 | 335.418837  | 7.56994E-06 | 0.005976919 |
| 789.599987 | 365.314436  | 8.24464E-06 | 0.006509966 |
| 789.639987 | 402.213364  | 9.0774E-06  | 0.007167874 |
| 789.679987 | 407.679106  | 9.20075E-06 | 0.007265648 |
| 789.719987 | 403.628298  | 9.10933E-06 | 0.007193819 |
| 789.759987 | 394.976577  | 8.91407E-06 | 0.007039977 |
| 789.799987 | 379.114278  | 8.55608E-06 | 0.006757593 |
| 789.839987 | 357.600965  | 8.07056E-06 | 0.006374448 |
| 789.879987 | 317.517407  | 7.16593E-06 | 0.005660221 |
| 789.919987 | 313.335188  | 7.07154E-06 | 0.00558595  |
| 789.959987 | 341.762982  | 7.71311E-06 | 0.006093052 |
| 789.999987 | 419.256666  | 9.46204E-06 | 0.007475011 |
| 790.039987 | 577.198887  | 1.30266E-05 | 0.010291515 |
| 790.079987 | 784.558205  | 1.77064E-05 | 0.013989461 |
| 790.119987 | 984.228949  | 2.22127E-05 | 0.01755068  |
| 790.159987 | 1142.993086 | 2.57958E-05 | 0.020382779 |
| 790.199987 | 1219.399537 | 2.75201E-05 | 0.021746421 |
| 790.239987 | 1238.12992  | 2.79429E-05 | 0.022081571 |
| 790.279987 | 1183.515656 | 2.67103E-05 | 0.021108615 |
| 790.319987 | 1015.93402  | 2.29282E-05 | 0.018120627 |

|            |             |             |             |
|------------|-------------|-------------|-------------|
| 790.359987 | 817.457982  | 1.84489E-05 | 0.014581263 |
| 790.399987 | 648.738139  | 1.46411E-05 | 0.011572338 |
| 790.439987 | 543.646829  | 1.22694E-05 | 0.009698186 |
| 790.479987 | 474.141544  | 1.07007E-05 | 0.0084587   |
| 790.519987 | 414.040422  | 9.34432E-06 | 0.007386868 |
| 790.559987 | 373.821053  | 8.43662E-06 | 0.006669655 |
| 790.599987 | 372.687992  | 8.41105E-06 | 0.006649775 |
| 790.639987 | 397.014807  | 8.96007E-06 | 0.007084191 |
| 790.679987 | 438.627806  | 9.89922E-06 | 0.007827114 |
| 790.719987 | 443.830475  | 1.00166E-05 | 0.007920354 |
| 790.759987 | 412.601025  | 9.31183E-06 | 0.007363423 |
| 790.799987 | 368.444077  | 8.31527E-06 | 0.006575715 |
| 790.839987 | 344.374468  | 7.77205E-06 | 0.00614645  |
| 790.879987 | 343.02474   | 7.74159E-06 | 0.006122669 |
| 790.919987 | 384.879937  | 8.6862E-06  | 0.006870092 |
| 790.959987 | 458.91849   | 1.03572E-05 | 0.008192092 |
| 790.999987 | 635.813167  | 1.43494E-05 | 0.011350389 |
| 791.039987 | 927.730142  | 2.09376E-05 | 0.016562461 |
| 791.079987 | 1251.982595 | 2.82555E-05 | 0.022352363 |
| 791.119987 | 1522.434641 | 3.43592E-05 | 0.027182273 |
| 791.159987 | 1740.319606 | 3.92766E-05 | 0.031074066 |
| 791.199987 | 1773.527548 | 4.0026E-05  | 0.031668607 |
| 791.239987 | 1672.52661  | 3.77466E-05 | 0.029866616 |
| 791.279987 | 1457.763757 | 3.28997E-05 | 0.026032872 |
| 791.319987 | 1215.132763 | 2.74239E-05 | 0.021701044 |
| 791.359987 | 970.019896  | 2.1892E-05  | 0.017324451 |
| 791.399987 | 694.268302  | 1.56687E-05 | 0.012400184 |
| 791.439987 | 483.506641  | 1.09121E-05 | 0.00863625  |
| 791.479987 | 375.690937  | 8.47882E-06 | 0.006710817 |
| 791.519987 | 344.606188  | 7.77728E-06 | 0.006155874 |
| 791.559987 | 347.252647  | 7.83701E-06 | 0.006203462 |
| 791.599987 | 355.542478  | 8.0241E-06  | 0.006351876 |
| 791.639987 | 375.257145  | 8.46903E-06 | 0.006704424 |
| 791.679987 | 404.659821  | 9.13261E-06 | 0.007230103 |
| 791.719987 | 422.919396  | 9.5447E-06  | 0.007556731 |
| 791.759987 | 410.033468  | 9.25388E-06 | 0.007326855 |
| 791.799987 | 375.245361  | 8.46877E-06 | 0.006705568 |
| 791.839987 | 346.923706  | 7.82958E-06 | 0.006199778 |
| 791.879987 | 321.761375  | 7.26171E-06 | 0.0057504   |
| 791.919987 | 329.755163  | 7.44211E-06 | 0.005893559 |
| 791.959987 | 377.240348  | 8.51379E-06 | 0.00674258  |
| 791.999987 | 449.579927  | 1.01464E-05 | 0.008035943 |
| 792.039987 | 571.209064  | 1.28914E-05 | 0.010210499 |
| 792.079987 | 738.510354  | 1.66672E-05 | 0.013201716 |
| 792.119987 | 945.411663  | 2.13366E-05 | 0.016901167 |
| 792.159987 | 1166.044825 | 2.6316E-05  | 0.020846488 |

|            |             |             |             |
|------------|-------------|-------------|-------------|
| 792.199987 | 1325.56046  | 2.99161E-05 | 0.023699497 |
| 792.239987 | 1310.809008 | 2.95831E-05 | 0.023436941 |
| 792.279987 | 1159.553839 | 2.61695E-05 | 0.020733583 |
| 792.319987 | 986.124687  | 2.22555E-05 | 0.017633446 |
| 792.359987 | 809.220154  | 1.8263E-05  | 0.014470848 |
| 792.399987 | 637.698114  | 1.4392E-05  | 0.011404187 |
| 792.439987 | 496.966729  | 1.12158E-05 | 0.008887886 |
| 792.479987 | 404.908619  | 9.13822E-06 | 0.007241859 |
| 792.519987 | 346.002772  | 7.8088E-06  | 0.006188631 |
| 792.559987 | 341.739227  | 7.71258E-06 | 0.006112681 |
| 792.599987 | 374.277776  | 8.44693E-06 | 0.006695035 |
| 792.639987 | 408.953     | 9.2295E-06  | 0.00731567  |
| 792.679987 | 421.648534  | 9.51602E-06 | 0.007543159 |
| 792.719987 | 416.677909  | 9.40384E-06 | 0.007454612 |
| 792.759987 | 385.333685  | 8.69644E-06 | 0.006894193 |
| 792.799987 | 378.560872  | 8.54359E-06 | 0.006773359 |
| 792.839987 | 384.065203  | 8.66782E-06 | 0.006872192 |
| 792.879987 | 388.952763  | 8.77812E-06 | 0.006959997 |
| 792.919987 | 377.622275  | 8.52241E-06 | 0.006757588 |
| 792.959987 | 408.22648   | 9.2131E-06  | 0.007305622 |
| 792.999987 | 529.370971  | 1.19472E-05 | 0.009474102 |
| 793.039987 | 714.429272  | 1.61237E-05 | 0.012786718 |
| 793.079987 | 1022.215815 | 2.307E-05   | 0.018296345 |
| 793.119987 | 1360.152859 | 3.06968E-05 | 0.02434621  |
| 793.159987 | 1540.685854 | 3.47711E-05 | 0.027579072 |
| 793.199987 | 1532.207262 | 3.45798E-05 | 0.027428684 |
| 793.239987 | 1470.585652 | 3.31891E-05 | 0.026326897 |
| 793.279987 | 1363.840412 | 3.078E-05   | 0.024417141 |
| 793.319987 | 1185.931941 | 2.67648E-05 | 0.021233076 |
| 793.359987 | 958.283234  | 2.16271E-05 | 0.01715809  |
| 793.399987 | 744.950573  | 1.68125E-05 | 0.013339035 |
| 793.439987 | 548.195561  | 1.2372E-05  | 0.009816448 |
| 793.479987 | 412.058455  | 9.29959E-06 | 0.007379035 |
| 793.519987 | 361.855405  | 8.16657E-06 | 0.006480338 |
| 793.559987 | 337.110699  | 7.60812E-06 | 0.006037499 |
| 793.599987 | 318.098888  | 7.17905E-06 | 0.005697293 |
| 793.639987 | 349.491458  | 7.88754E-06 | 0.006259863 |
| 793.679987 | 370.629328  | 8.36459E-06 | 0.006638806 |
| 793.719987 | 363.261096  | 8.1983E-06  | 0.006507152 |
| 793.759987 | 340.436186  | 7.68317E-06 | 0.006098593 |
| 793.799987 | 317.149101  | 7.15761E-06 | 0.005681713 |
| 793.839987 | 298.034419  | 6.72622E-06 | 0.005339544 |
| 793.879987 | 289.071     | 6.52393E-06 | 0.005179217 |
| 793.919987 | 294.074239  | 6.63685E-06 | 0.005269125 |
| 793.959987 | 344.335102  | 7.77116E-06 | 0.006169993 |
| 793.999987 | 434.509216  | 9.80627E-06 | 0.007786176 |

|            |             |             |             |
|------------|-------------|-------------|-------------|
| 794.039987 | 560.703701  | 1.26543E-05 | 0.010048021 |
| 794.079987 | 729.476811  | 1.64633E-05 | 0.013073158 |
| 794.119987 | 938.020261  | 2.11698E-05 | 0.01681137  |
| 794.159987 | 1107.77719  | 2.5001E-05  | 0.019854784 |
| 794.199987 | 1210.698122 | 2.73238E-05 | 0.021700538 |
| 794.239987 | 1183.527426 | 2.67106E-05 | 0.021214599 |
| 794.279987 | 1079.824781 | 2.43701E-05 | 0.019356715 |
| 794.319987 | 930.321548  | 2.09961E-05 | 0.016677591 |
| 794.359987 | 763.255093  | 1.72256E-05 | 0.013683331 |
| 794.399987 | 592.45375   | 1.33709E-05 | 0.010621808 |
| 794.439987 | 467.811389  | 1.05579E-05 | 0.008387579 |
| 794.479987 | 383.540691  | 8.65598E-06 | 0.006877002 |
| 794.519987 | 325.594401  | 7.34821E-06 | 0.005838301 |
| 794.559987 | 330.139612  | 7.45079E-06 | 0.005920101 |
| 794.599987 | 375.601635  | 8.47681E-06 | 0.00673567  |
| 794.639987 | 412.188495  | 9.30252E-06 | 0.007392155 |
| 794.679987 | 428.184465  | 9.66353E-06 | 0.007679411 |
| 794.719987 | 423.820224  | 9.56503E-06 | 0.007601522 |
| 794.759987 | 404.971762  | 9.13965E-06 | 0.007263827 |
| 794.799987 | 378.589709  | 8.54424E-06 | 0.006790964 |
| 794.839987 | 359.247944  | 8.10773E-06 | 0.006444345 |
| 794.879987 | 371.913702  | 8.39357E-06 | 0.006671884 |
| 794.919987 | 392.327859  | 8.85429E-06 | 0.007038455 |
| 794.959987 | 406.684146  | 9.17829E-06 | 0.007296377 |
| 794.999987 | 490.982252  | 1.10808E-05 | 0.008809224 |
| 795.039987 | 676.221252  | 1.52614E-05 | 0.012133401 |
| 795.079987 | 935.625031  | 2.11158E-05 | 0.016788713 |
| 795.119987 | 1209.286978 | 2.72919E-05 | 0.021700353 |
| 795.159987 | 1424.899237 | 3.2158E-05  | 0.025570748 |
| 795.199987 | 1511.595985 | 3.41146E-05 | 0.027127942 |
| 795.239987 | 1496.1946   | 3.3767E-05  | 0.026852891 |
| 795.279987 | 1380.795406 | 3.11626E-05 | 0.024783015 |
| 795.319987 | 1162.184439 | 2.62289E-05 | 0.020860356 |
| 795.359987 | 915.969174  | 2.06721E-05 | 0.0164418   |
| 795.399987 | 662.921506  | 1.49612E-05 | 0.01190015  |
| 795.439987 | 479.99376   | 1.08328E-05 | 0.008616835 |
| 795.479987 | 386.218667  | 8.71642E-06 | 0.006933736 |
| 795.519987 | 328.129045  | 7.40542E-06 | 0.005891156 |
| 795.559987 | 306.531607  | 6.91799E-06 | 0.005503677 |
| 795.599987 | 336.506008  | 7.59447E-06 | 0.006042162 |
| 795.639987 | 373.226285  | 8.4232E-06  | 0.006701833 |
| 795.679987 | 397.425492  | 8.96934E-06 | 0.007136724 |
| 795.719987 | 401.007233  | 9.05017E-06 | 0.007201405 |
| 795.759987 | 379.686896  | 8.569E-06   | 0.006818871 |
| 795.799987 | 349.551352  | 7.88889E-06 | 0.006277976 |
| 795.839987 | 321.488512  | 7.25555E-06 | 0.005774255 |



|            |             |             |             |
|------------|-------------|-------------|-------------|
| 795.879987 | 287.738884  | 6.49387E-06 | 0.005168338 |
| 795.919987 | 281.903857  | 6.36218E-06 | 0.005063784 |
| 795.959987 | 323.294871  | 7.29631E-06 | 0.005807575 |
| 795.999987 | 401.740986  | 9.06673E-06 | 0.007217121 |
| 796.039987 | 523.749646  | 1.18203E-05 | 0.009409431 |
| 796.079987 | 675.936737  | 1.5255E-05  | 0.012144161 |
| 796.119987 | 860.106964  | 1.94114E-05 | 0.015453816 |
| 796.159987 | 1023.401654 | 2.30967E-05 | 0.018388708 |
| 796.199987 | 1130.596275 | 2.5516E-05  | 0.020315825 |
| 796.239987 | 1137.959584 | 2.56822E-05 | 0.020449165 |
| 796.279987 | 1036.791713 | 2.33989E-05 | 0.018632111 |
| 796.319987 | 862.456602  | 1.94644E-05 | 0.015499926 |
| 796.359987 | 675.306085  | 1.52407E-05 | 0.012137098 |
| 796.399987 | 541.887787  | 1.22297E-05 | 0.009739695 |
| 796.439987 | 437.94256   | 9.88375E-06 | 0.007871817 |
| 796.479987 | 368.620778  | 8.31926E-06 | 0.006626122 |
| 796.519987 | 308.900341  | 6.97145E-06 | 0.0055529   |
| 796.559987 | 300.379642  | 6.77915E-06 | 0.0054      |
| 796.599987 | 329.34749   | 7.43291E-06 | 0.005921059 |
| 796.639987 | 374.402714  | 8.44975E-06 | 0.006731407 |
| 796.679987 | 429.508248  | 9.6934E-06  | 0.00772254  |
| 796.719987 | 409.425376  | 9.24016E-06 | 0.007361821 |
| 796.759987 | 357.860464  | 8.07641E-06 | 0.006434962 |
| 796.799987 | 354.893746  | 8.00946E-06 | 0.006381936 |
| 796.839987 | 375.36361   | 8.47143E-06 | 0.006750377 |
| 796.879987 | 382.37735   | 8.62972E-06 | 0.006876854 |
| 796.919987 | 371.943881  | 8.39426E-06 | 0.00668955  |
| 796.959987 | 390.379597  | 8.81032E-06 | 0.007021476 |
| 796.999987 | 499.661798  | 1.12767E-05 | 0.008987506 |
| 797.039987 | 699.85421   | 1.57947E-05 | 0.012589035 |
| 797.079987 | 959.458093  | 2.16536E-05 | 0.017259677 |
| 797.119987 | 1225.358943 | 2.76546E-05 | 0.02204407  |
| 797.159987 | 1416.791986 | 3.1975E-05  | 0.025489208 |
| 797.199987 | 1507.802648 | 3.4029E-05  | 0.027127923 |
| 797.239987 | 1489.13657  | 3.36077E-05 | 0.026793433 |
| 797.279987 | 1330.124891 | 3.00191E-05 | 0.023933601 |
| 797.319987 | 1118.9856   | 2.52539E-05 | 0.020135476 |
| 797.359987 | 919.179284  | 2.07446E-05 | 0.016540911 |
| 797.399987 | 727.835307  | 1.64262E-05 | 0.013098275 |
| 797.439987 | 539.804549  | 1.21826E-05 | 0.009714922 |
| 797.479987 | 394.379605  | 8.9006E-06  | 0.007098049 |
| 797.519987 | 334.088002  | 7.5399E-06  | 0.006013222 |
| 797.559987 | 300.47311   | 6.78126E-06 | 0.005408461 |
| 797.599987 | 308.025612  | 6.95171E-06 | 0.005544683 |
| 797.639987 | 357.778066  | 8.07455E-06 | 0.006440586 |
| 797.679987 | 394.478373  | 8.90283E-06 | 0.007101607 |

|            |             |             |             |
|------------|-------------|-------------|-------------|
| 797.719987 | 438.254793  | 9.8908E-06  | 0.007890089 |
| 797.759987 | 445.625818  | 1.00572E-05 | 0.008023195 |
| 797.799987 | 390.751722  | 8.81872E-06 | 0.007035576 |
| 797.839987 | 323.061706  | 7.29105E-06 | 0.005817093 |
| 797.879987 | 301.451899  | 6.80335E-06 | 0.005428256 |
| 797.919987 | 324.818812  | 7.33071E-06 | 0.005849319 |
| 797.959987 | 360.463174  | 8.13515E-06 | 0.006491526 |
| 797.999987 | 427.871311  | 9.65646E-06 | 0.007705855 |
| 798.039987 | 557.194774  | 1.25751E-05 | 0.010035441 |
| 798.079987 | 703.081172  | 1.58676E-05 | 0.012663584 |
| 798.119987 | 838.445498  | 1.89225E-05 | 0.015102463 |
| 798.159987 | 998.72213   | 2.25398E-05 | 0.01799034  |
| 798.199987 | 1112.575897 | 2.51093E-05 | 0.020042234 |
| 798.239987 | 1137.697155 | 2.56762E-05 | 0.020495802 |
| 798.279987 | 1043.20783  | 2.35437E-05 | 0.018794503 |
| 798.319987 | 864.966211  | 1.95211E-05 | 0.01558407  |
| 798.359987 | 675.811855  | 1.52521E-05 | 0.012176692 |
| 798.399987 | 522.972819  | 1.18028E-05 | 0.00942333  |
| 798.439987 | 443.985891  | 1.00201E-05 | 0.008000483 |
| 798.479987 | 378.863891  | 8.55043E-06 | 0.006827347 |
| 798.519987 | 332.182912  | 7.49691E-06 | 0.005986429 |
| 798.559987 | 338.516694  | 7.63985E-06 | 0.006100879 |
| 798.599987 | 374.691965  | 8.45628E-06 | 0.006753182 |
| 798.639987 | 381.317775  | 8.60581E-06 | 0.006872945 |
| 798.679987 | 382.800867  | 8.63928E-06 | 0.006900022 |
| 798.719987 | 371.796259  | 8.39092E-06 | 0.006701998 |
| 798.759987 | 352.893739  | 7.96432E-06 | 0.00636158  |
| 798.799987 | 353.672787  | 7.9819E-06  | 0.006375943 |
| 798.839987 | 365.279303  | 8.24385E-06 | 0.006585513 |
| 798.879987 | 361.576548  | 8.16028E-06 | 0.006519084 |
| 798.919987 | 346.155832  | 7.81225E-06 | 0.006241367 |
| 798.959987 | 385.821453  | 8.70745E-06 | 0.006956906 |
| 798.999987 | 532.288013  | 1.2013E-05  | 0.009598386 |
| 799.039987 | 737.776952  | 1.66506E-05 | 0.013304494 |
| 799.079987 | 992.810022  | 2.24063E-05 | 0.017904457 |
| 799.119987 | 1265.877158 | 2.85691E-05 | 0.022830126 |
| 799.159987 | 1506.846431 | 3.40074E-05 | 0.027177373 |
| 799.199987 | 1698.807131 | 3.83397E-05 | 0.030641096 |
| 799.239987 | 1792.098847 | 4.04452E-05 | 0.032325401 |
| 799.279987 | 1678.832361 | 3.78889E-05 | 0.030283846 |
| 799.319987 | 1404.554291 | 3.16988E-05 | 0.025337512 |
| 799.359987 | 1082.486932 | 2.44302E-05 | 0.019528542 |
| 799.399987 | 772.772541  | 1.74404E-05 | 0.013941855 |
| 799.439987 | 555.850613  | 1.25448E-05 | 0.010028794 |
| 799.479987 | 408.536253  | 9.22009E-06 | 0.007371281 |
| 799.519987 | 313.800598  | 7.08204E-06 | 0.005662234 |

|            |             |             |             |
|------------|-------------|-------------|-------------|
| 799.559987 | 268.227817  | 6.05353E-06 | 0.004840159 |
| 799.599987 | 292.748099  | 6.60692E-06 | 0.005282891 |
| 799.639987 | 367.410675  | 8.29195E-06 | 0.006630573 |
| 799.679987 | 394.502522  | 8.90337E-06 | 0.007119849 |
| 799.719987 | 421.879784  | 9.52124E-06 | 0.007614325 |
| 799.759987 | 422.544552  | 9.53624E-06 | 0.007626705 |
| 799.799987 | 390.648849  | 8.8164E-06  | 0.007051357 |
| 799.839987 | 365.761183  | 8.25472E-06 | 0.006602455 |
| 799.879987 | 327.670854  | 7.39507E-06 | 0.005915172 |
| 799.919987 | 298.556934  | 6.73801E-06 | 0.005389872 |
| 799.959987 | 313.198081  | 7.06844E-06 | 0.005654473 |
| 799.999987 | 375.528039  | 8.47514E-06 | 0.006780116 |
| 800.039987 | 493.379324  | 1.11349E-05 | 0.008908353 |
| 800.079987 | 651.27734   | 1.46984E-05 | 0.011759914 |
| 800.119987 | 878.380722  | 1.98238E-05 | 0.015861442 |
| 800.159987 | 1079.763356 | 2.43688E-05 | 0.019498903 |
| 800.199987 | 1167.110553 | 2.63401E-05 | 0.021077315 |
| 800.239987 | 1178.500615 | 2.65971E-05 | 0.021284077 |
| 800.279987 | 1123.923906 | 2.53654E-05 | 0.02029942  |
| 800.319987 | 959.062904  | 2.16447E-05 | 0.017322697 |
| 800.359987 | 758.105373  | 1.71094E-05 | 0.013693665 |
| 800.399987 | 567.472475  | 1.28071E-05 | 0.010250773 |
| 800.439987 | 422.201361  | 9.5285E-06  | 0.00762699  |
| 800.479987 | 351.206639  | 7.92624E-06 | 0.0063448   |
| 800.519987 | 339.657627  | 7.6656E-06  | 0.006136466 |
| 800.559987 | 348.108281  | 7.85632E-06 | 0.006289455 |
| 800.599987 | 377.757476  | 8.52546E-06 | 0.006825483 |
| 800.639987 | 426.597979  | 9.62772E-06 | 0.007708339 |
| 800.679987 | 428.631228  | 9.67361E-06 | 0.007745466 |
| 800.719987 | 427.884392  | 9.65675E-06 | 0.007732357 |
| 800.759987 | 450.844771  | 1.01749E-05 | 0.008147684 |
| 800.799987 | 442.951132  | 9.99679E-06 | 0.008005429 |
| 800.839987 | 417.13129   | 9.41407E-06 | 0.007539165 |
| 800.879987 | 399.400841  | 9.01392E-06 | 0.007219069 |
| 800.919987 | 405.261867  | 9.1462E-06  | 0.007325371 |
| 800.959987 | 493.921297  | 1.11471E-05 | 0.008928394 |
| 800.999987 | 662.404166  | 1.49495E-05 | 0.011974581 |
| 801.039987 | 868.085122  | 1.95915E-05 | 0.015693553 |
| 801.079987 | 1132.091198 | 2.55497E-05 | 0.020467371 |
| 801.119987 | 1452.390102 | 3.27784E-05 | 0.026259449 |
| 801.159987 | 1773.544505 | 4.00264E-05 | 0.032067573 |
| 801.199987 | 1974.644326 | 4.4565E-05  | 0.035705455 |
| 801.239987 | 2004.828826 | 4.52462E-05 | 0.03625306  |
| 801.279987 | 1812.837338 | 4.09132E-05 | 0.032782939 |
| 801.319987 | 1421.958412 | 3.20916E-05 | 0.025715657 |
| 801.359987 | 1026.907567 | 2.31759E-05 | 0.018572218 |

|            |             |             |             |
|------------|-------------|-------------|-------------|
| 801.399987 | 721.701701  | 1.62878E-05 | 0.013053044 |
| 801.439987 | 552.464871  | 1.24684E-05 | 0.009992644 |
| 801.479987 | 443.074404  | 9.99957E-06 | 0.008014457 |
| 801.519987 | 341.511843  | 7.70745E-06 | 0.006177673 |
| 801.559987 | 310.22127   | 7.00126E-06 | 0.005611931 |
| 801.599987 | 340.984032  | 7.69553E-06 | 0.00616874  |
| 801.639987 | 398.042385  | 8.98326E-06 | 0.007201342 |
| 801.679987 | 421.339678  | 9.50905E-06 | 0.007623215 |
| 801.719987 | 381.536698  | 8.61075E-06 | 0.006903412 |
| 801.759987 | 334.299643  | 7.54468E-06 | 0.00604902  |
| 801.799987 | 314.720719  | 7.10281E-06 | 0.005695032 |
| 801.839987 | 294.501329  | 6.64648E-06 | 0.005329417 |
| 801.879987 | 302.704767  | 6.83162E-06 | 0.005478143 |
| 801.919987 | 308.29482   | 6.95778E-06 | 0.005579587 |
| 801.959987 | 341.982744  | 7.71807E-06 | 0.006189587 |
| 801.999987 | 432.800807  | 9.76771E-06 | 0.007833704 |
| 802.039987 | 544.638435  | 1.22917E-05 | 0.00985846  |
| 802.079987 | 757.494224  | 1.70956E-05 | 0.01371203  |
| 802.119987 | 1004.644391 | 2.26734E-05 | 0.018186807 |
| 802.159987 | 1212.551174 | 2.73656E-05 | 0.021951582 |
| 802.199987 | 1293.978886 | 2.92033E-05 | 0.023426888 |
| 802.239987 | 1317.439092 | 2.97328E-05 | 0.023852813 |
| 802.279987 | 1267.870637 | 2.86141E-05 | 0.022956499 |
| 802.319987 | 1079.095764 | 2.43537E-05 | 0.019539451 |
| 802.359987 | 804.64347   | 1.81597E-05 | 0.014570602 |
| 802.399987 | 578.421657  | 1.30542E-05 | 0.010474667 |
| 802.439987 | 437.274844  | 9.86868E-06 | 0.007919027 |
| 802.479987 | 370.300765  | 8.35717E-06 | 0.006706464 |
| 802.519987 | 318.876795  | 7.19661E-06 | 0.005775419 |
| 802.559987 | 329.682909  | 7.44048E-06 | 0.005971435 |
| 802.599987 | 382.035268  | 8.622E-06   | 0.00692002  |
| 802.639987 | 409.188761  | 9.23482E-06 | 0.007412236 |
| 802.679987 | 414.017837  | 9.34381E-06 | 0.007500086 |
| 802.719987 | 425.964856  | 9.61343E-06 | 0.007716895 |
| 802.759987 | 436.638532  | 9.85432E-06 | 0.007910657 |
| 802.799987 | 418.590126  | 9.447E-06   | 0.007584048 |
| 802.839987 | 394.320752  | 8.89927E-06 | 0.00714469  |
| 802.879987 | 380.78038   | 8.59368E-06 | 0.006899696 |
| 802.919987 | 406.010953  | 9.1631E-06  | 0.007357237 |
| 802.959987 | 459.476415  | 1.03697E-05 | 0.008326488 |
| 802.999987 | 561.735624  | 1.26776E-05 | 0.010180105 |
| 803.039987 | 788.764835  | 1.78013E-05 | 0.014295175 |
| 803.079987 | 1097.444746 | 2.47678E-05 | 0.019890524 |
| 803.119987 | 1374.349031 | 3.10171E-05 | 0.024910488 |
| 803.159987 | 1574.941093 | 3.55442E-05 | 0.028547701 |
| 803.199987 | 1678.804404 | 3.78883E-05 | 0.030431864 |

|            |             |             |             |
|------------|-------------|-------------|-------------|
| 803.239987 | 1619.990445 | 3.65609E-05 | 0.029367199 |
| 803.279987 | 1412.717845 | 3.18831E-05 | 0.025611035 |
| 803.319987 | 1169.287598 | 2.63892E-05 | 0.021198966 |
| 803.359987 | 921.28999   | 2.07922E-05 | 0.016703647 |
| 803.399987 | 692.863911  | 1.5637E-05  | 0.012562744 |
| 803.439987 | 527.167066  | 1.18974E-05 | 0.009558868 |
| 803.479987 | 422.726393  | 9.54035E-06 | 0.007665477 |
| 803.519987 | 363.93547   | 8.21352E-06 | 0.006599725 |
| 803.559987 | 338.894691  | 7.64838E-06 | 0.006145933 |
| 803.599987 | 326.884935  | 7.37734E-06 | 0.005928428 |
| 803.639987 | 335.425117  | 7.57008E-06 | 0.006083617 |
| 803.679987 | 342.804048  | 7.73661E-06 | 0.006217759 |
| 803.719987 | 368.151499  | 8.30867E-06 | 0.006677841 |
| 803.759987 | 395.681767  | 8.92999E-06 | 0.007177566 |
| 803.799987 | 344.883074  | 7.78353E-06 | 0.006256402 |
| 803.839987 | 321.890944  | 7.26463E-06 | 0.0058396   |
| 803.879987 | 325.712759  | 7.35088E-06 | 0.005909228 |
| 803.919987 | 350.585014  | 7.91222E-06 | 0.006360788 |
| 803.959987 | 392.313857  | 8.85398E-06 | 0.007118243 |
| 803.999986 | 443.004591  | 9.998E-06   | 0.008038389 |
| 804.039986 | 539.795483  | 1.21824E-05 | 0.009795163 |
| 804.079986 | 694.373812  | 1.5671E-05  | 0.012600777 |
| 804.119986 | 881.790649  | 1.99008E-05 | 0.01600262  |
| 804.159986 | 1071.73459  | 2.41876E-05 | 0.019450665 |
| 804.199986 | 1169.3305   | 2.63902E-05 | 0.021222967 |
| 804.239986 | 1098.527338 | 2.47922E-05 | 0.019938904 |
| 804.279986 | 955.360738  | 2.15612E-05 | 0.01734121  |
| 804.319986 | 831.925882  | 1.87754E-05 | 0.015101436 |
| 804.359986 | 712.57049   | 1.60817E-05 | 0.012935495 |
| 804.399986 | 568.100968  | 1.28212E-05 | 0.010313411 |
| 804.439986 | 450.719849  | 1.01721E-05 | 0.008182859 |
| 804.479986 | 361.777589  | 8.16482E-06 | 0.006568431 |
| 804.519986 | 304.26846   | 6.86692E-06 | 0.005524571 |
| 804.559986 | 307.687435  | 6.94408E-06 | 0.005586926 |
| 804.599986 | 356.303254  | 8.04127E-06 | 0.006470004 |
| 804.639986 | 398.061682  | 8.9837E-06  | 0.007228642 |
| 804.679986 | 435.921089  | 9.83813E-06 | 0.007916548 |
| 804.719986 | 419.453103  | 9.46647E-06 | 0.007617859 |
| 804.759986 | 382.545295  | 8.63351E-06 | 0.006947907 |
| 804.799986 | 363.464188  | 8.20288E-06 | 0.006601678 |
| 804.839986 | 349.642759  | 7.89095E-06 | 0.006350952 |
| 804.879986 | 358.989349  | 8.10189E-06 | 0.006521049 |
| 804.919986 | 410.951347  | 9.2746E-06  | 0.00746531  |
| 804.959986 | 507.553864  | 1.14548E-05 | 0.009220643 |
| 804.999986 | 650.833294  | 1.46884E-05 | 0.011824163 |
| 805.039986 | 873.885742  | 1.97224E-05 | 0.015877308 |

|            |             |             |             |
|------------|-------------|-------------|-------------|
| 805.079986 | 1199.845755 | 2.70788E-05 | 0.021800638 |
| 805.119986 | 1521.554572 | 3.43394E-05 | 0.027647311 |
| 805.159986 | 1768.33408  | 3.99088E-05 | 0.032132999 |
| 805.199986 | 1862.203962 | 4.20273E-05 | 0.033840421 |
| 805.239986 | 1772.485783 | 4.00025E-05 | 0.032211641 |
| 805.279986 | 1586.360677 | 3.5802E-05  | 0.028830594 |
| 805.319986 | 1288.03883  | 2.90692E-05 | 0.023410042 |
| 805.359986 | 980.207422  | 2.21219E-05 | 0.017816106 |
| 805.399986 | 754.957332  | 1.70383E-05 | 0.013722675 |
| 805.439986 | 609.148526  | 1.37476E-05 | 0.011072894 |
| 805.479986 | 515.725009  | 1.16392E-05 | 0.009375139 |
| 805.519986 | 434.67135   | 9.80993E-06 | 0.007902092 |
| 805.559986 | 385.50449   | 8.7003E-06  | 0.007008613 |
| 805.599986 | 385.257421  | 8.69472E-06 | 0.007004469 |
| 805.639986 | 380.417666  | 8.5855E-06  | 0.00691682  |
| 805.679986 | 379.232954  | 8.55876E-06 | 0.006895621 |
| 805.719986 | 377.449706  | 8.51851E-06 | 0.006863537 |
| 805.759986 | 336.890182  | 7.60314E-06 | 0.006126308 |
| 805.799986 | 304.182347  | 6.86497E-06 | 0.005531794 |
| 805.839986 | 315.949798  | 7.13055E-06 | 0.00574608  |
| 805.879986 | 352.970377  | 7.96605E-06 | 0.00641968  |
| 805.919986 | 410.452031  | 9.26333E-06 | 0.007465503 |
| 805.959986 | 431.136412  | 9.73015E-06 | 0.00784211  |
| 805.999986 | 482.289353  | 1.08846E-05 | 0.008772987 |
| 806.039986 | 620.325393  | 1.39999E-05 | 0.011284463 |
| 806.079986 | 784.65552   | 1.77086E-05 | 0.014274534 |
| 806.119986 | 1007.765364 | 2.27439E-05 | 0.018334281 |
| 806.159986 | 1256.371826 | 2.83546E-05 | 0.022858313 |
| 806.199986 | 1348.721944 | 3.04388E-05 | 0.024539741 |
| 806.239986 | 1298.613606 | 2.93079E-05 | 0.023629201 |
| 806.279986 | 1200.541648 | 2.70946E-05 | 0.021845796 |
| 806.319986 | 1034.973361 | 2.33579E-05 | 0.018833947 |
| 806.359986 | 840.6268    | 1.89718E-05 | 0.015298081 |
| 806.399986 | 683.103684  | 1.54167E-05 | 0.012432026 |
| 806.439986 | 536.00087   | 1.20968E-05 | 0.009755338 |
| 806.479986 | 405.327412  | 9.14768E-06 | 0.007377417 |
| 806.519986 | 336.307875  | 7.59E-06    | 0.006121487 |
| 806.559986 | 315.597433  | 7.12259E-06 | 0.0057448   |
| 806.599986 | 353.364495  | 7.97494E-06 | 0.00643259  |
| 806.639986 | 398.134445  | 8.98534E-06 | 0.007247934 |
| 806.679986 | 410.135532  | 9.25619E-06 | 0.007466781 |
| 806.719986 | 414.947305  | 9.36478E-06 | 0.007554757 |
| 806.759986 | 407.541153  | 9.19764E-06 | 0.007420285 |
| 806.799986 | 393.676476  | 8.88473E-06 | 0.0071682   |
| 806.839986 | 363.915344  | 8.21306E-06 | 0.006626627 |
| 806.879986 | 353.698679  | 7.98249E-06 | 0.006440909 |

|            |             |             |             |
|------------|-------------|-------------|-------------|
| 806.919986 | 402.416118  | 9.08197E-06 | 0.007328424 |
| 806.959986 | 492.560093  | 1.11164E-05 | 0.008970486 |
| 806.999986 | 595.064429  | 1.34298E-05 | 0.010837828 |
| 807.039986 | 780.078619  | 1.76053E-05 | 0.014208171 |
| 807.079986 | 1046.550346 | 2.36192E-05 | 0.01906257  |
| 807.119986 | 1308.687826 | 2.95353E-05 | 0.0238385   |
| 807.159986 | 1509.954448 | 3.40776E-05 | 0.02750605  |
| 807.199986 | 1615.077669 | 3.64501E-05 | 0.029422483 |
| 807.239986 | 1591.665451 | 3.59217E-05 | 0.02899741  |
| 807.279986 | 1402.31911  | 3.16484E-05 | 0.025549111 |
| 807.319986 | 1128.444607 | 2.54674E-05 | 0.02056036  |
| 807.359986 | 864.462359  | 1.95097E-05 | 0.01575136  |
| 807.399986 | 651.623278  | 1.47062E-05 | 0.01187381  |
| 807.439986 | 505.014158  | 1.13975E-05 | 0.00920277  |
| 807.479986 | 416.091284  | 9.3906E-06  | 0.007582722 |
| 807.519986 | 350.223966  | 7.90407E-06 | 0.006382692 |
| 807.559986 | 321.377527  | 7.25304E-06 | 0.005857267 |
| 807.599986 | 323.84375   | 7.3087E-06  | 0.005902508 |
| 807.639986 | 366.383747  | 8.26877E-06 | 0.00667819  |
| 807.679986 | 391.83436   | 8.84316E-06 | 0.00714244  |
| 807.719986 | 399.999659  | 9.02744E-06 | 0.00729164  |
| 807.759986 | 391.374644  | 8.83278E-06 | 0.007134767 |
| 807.799986 | 373.780729  | 8.43571E-06 | 0.006814367 |
| 807.839986 | 335.818684  | 7.57896E-06 | 0.006122587 |
| 807.879986 | 292.275667  | 6.59625E-06 | 0.005328982 |
| 807.919986 | 288.268071  | 6.50581E-06 | 0.005256173 |
| 807.959986 | 347.099175  | 7.83354E-06 | 0.006329191 |
| 807.999986 | 437.272337  | 9.86863E-06 | 0.007973851 |
| 808.039986 | 550.463828  | 1.24232E-05 | 0.010038444 |
| 808.079986 | 751.490854  | 1.69601E-05 | 0.013705119 |
| 808.119986 | 965.445349  | 2.17888E-05 | 0.01760793  |
| 808.159986 | 1170.303369 | 2.64121E-05 | 0.021345216 |
| 808.199986 | 1219.117919 | 2.75138E-05 | 0.022236647 |
| 808.239986 | 1102.379524 | 2.48792E-05 | 0.02010834  |
| 808.279986 | 964.385929  | 2.17648E-05 | 0.01759209  |
| 808.319986 | 867.431707  | 1.95767E-05 | 0.015824258 |
| 808.359986 | 772.45694   | 1.74333E-05 | 0.014092364 |
| 808.399986 | 620.547876  | 1.40049E-05 | 0.011321562 |
| 808.439986 | 460.393107  | 1.03904E-05 | 0.00840004  |
| 808.479986 | 356.75854   | 8.05154E-06 | 0.006509512 |
| 808.519986 | 309.465954  | 6.98422E-06 | 0.005646878 |
| 808.559986 | 304.081376  | 6.86269E-06 | 0.005548899 |
| 808.599986 | 301.833128  | 6.81195E-06 | 0.005508145 |
| 808.639986 | 332.414308  | 7.50213E-06 | 0.006066521 |
| 808.679986 | 386.887856  | 8.73152E-06 | 0.007061005 |
| 808.719986 | 407.859481  | 9.20482E-06 | 0.007444122 |

|            |             |             |             |
|------------|-------------|-------------|-------------|
| 808.759986 | 394.194342  | 8.89642E-06 | 0.007195066 |
| 808.799986 | 384.580272  | 8.67944E-06 | 0.007019932 |
| 808.839986 | 362.037877  | 8.17069E-06 | 0.006608781 |
| 808.879986 | 340.385389  | 7.68202E-06 | 0.006213836 |
| 808.919986 | 377.276998  | 8.51462E-06 | 0.006887643 |
| 808.959986 | 451.833361  | 1.01972E-05 | 0.008249167 |
| 808.999986 | 573.717058  | 1.2948E-05  | 0.010474928 |
| 809.039986 | 761.858284  | 1.71941E-05 | 0.013910698 |
| 809.079986 | 1038.023316 | 2.34267E-05 | 0.018954107 |
| 809.119986 | 1327.14423  | 2.99518E-05 | 0.024234597 |
| 809.159986 | 1537.344741 | 3.46957E-05 | 0.028074396 |
| 809.199986 | 1625.953444 | 3.66955E-05 | 0.029694002 |
| 809.239986 | 1537.193975 | 3.46923E-05 | 0.028074418 |
| 809.279986 | 1377.802492 | 3.10951E-05 | 0.025164628 |
| 809.319986 | 1154.710787 | 2.60602E-05 | 0.021091052 |
| 809.359986 | 901.449265  | 2.03445E-05 | 0.016465987 |
| 809.399986 | 690.84419   | 1.55914E-05 | 0.012619672 |
| 809.439986 | 530.323616  | 1.19687E-05 | 0.009687916 |
| 809.479986 | 422.83801   | 9.54286E-06 | 0.007724758 |
| 809.519986 | 368.191064  | 8.30956E-06 | 0.006726754 |
| 809.559986 | 336.67057   | 7.59819E-06 | 0.006151187 |
| 809.599986 | 339.083294  | 7.65264E-06 | 0.006195575 |
| 809.639986 | 343.577355  | 7.75406E-06 | 0.006277999 |
| 809.679986 | 350.878601  | 7.91884E-06 | 0.006411727 |
| 809.719986 | 355.546932  | 8.0242E-06  | 0.006497354 |
| 809.759986 | 360.973422  | 8.14667E-06 | 0.006596845 |
| 809.799986 | 345.570073  | 7.79904E-06 | 0.006315659 |
| 809.839986 | 308.945692  | 6.97247E-06 | 0.005646588 |
| 809.879986 | 281.886498  | 6.36179E-06 | 0.005152283 |
| 809.919986 | 292.895859  | 6.61025E-06 | 0.005353775 |
| 809.959986 | 338.185039  | 7.63237E-06 | 0.00618191  |
| 809.999986 | 419.501176  | 9.46756E-06 | 0.007668721 |
| 810.039986 | 573.997514  | 1.29543E-05 | 0.010493521 |
| 810.079986 | 735.186754  | 1.65921E-05 | 0.013440961 |
| 810.119986 | 920.177393  | 2.07671E-05 | 0.016823861 |
| 810.159986 | 1085.852472 | 2.45062E-05 | 0.019853925 |
| 810.199986 | 1176.450599 | 2.65509E-05 | 0.021511499 |
| 810.239986 | 1161.80143  | 2.62202E-05 | 0.021244687 |
| 810.279986 | 1081.754134 | 2.44137E-05 | 0.01978192  |
| 810.319986 | 935.046482  | 2.11027E-05 | 0.017099937 |
| 810.359986 | 757.361545  | 1.70926E-05 | 0.013851155 |
| 810.399986 | 587.515821  | 1.32594E-05 | 0.010745429 |
| 810.439986 | 485.155158  | 1.09493E-05 | 0.008873731 |
| 810.479986 | 433.761484  | 9.78939E-06 | 0.007934107 |
| 810.519986 | 388.994398  | 8.77906E-06 | 0.007115605 |
| 810.559986 | 368.707388  | 8.32121E-06 | 0.006744842 |



|            |             |             |             |
|------------|-------------|-------------|-------------|
| 810.599986 | 392.258887  | 8.85274E-06 | 0.007176028 |
| 810.639986 | 410.064387  | 9.25458E-06 | 0.007502134 |
| 810.679986 | 451.460558  | 1.01888E-05 | 0.008259885 |
| 810.719986 | 476.661217  | 1.07576E-05 | 0.008721385 |
| 810.759986 | 489.067716  | 1.10376E-05 | 0.008948826 |
| 810.799986 | 482.72862   | 1.08945E-05 | 0.008833271 |
| 810.839986 | 447.748769  | 1.01051E-05 | 0.008193592 |
| 810.879986 | 442.351975  | 9.98327E-06 | 0.008095232 |
| 810.919986 | 489.190781  | 1.10404E-05 | 0.008952844 |
| 810.959986 | 589.988274  | 1.33152E-05 | 0.010798105 |
| 810.999986 | 715.662785  | 1.61515E-05 | 0.013098876 |
| 811.039986 | 913.602984  | 2.06187E-05 | 0.016722628 |
| 811.079986 | 1168.341405 | 2.63678E-05 | 0.021386426 |
| 811.119986 | 1433.682052 | 3.23562E-05 | 0.026244766 |
| 811.159986 | 1677.658336 | 3.78624E-05 | 0.030712473 |
| 811.199986 | 1768.445376 | 3.99113E-05 | 0.032376086 |
| 811.239986 | 1685.343684 | 3.80359E-05 | 0.03085621  |
| 811.279986 | 1477.721923 | 3.33501E-05 | 0.027056289 |
| 811.319986 | 1222.664094 | 2.75938E-05 | 0.022387422 |
| 811.359986 | 946.15525   | 2.13534E-05 | 0.017325299 |
| 811.399986 | 700.149435  | 1.58014E-05 | 0.012821254 |
| 811.439986 | 509.840627  | 1.15064E-05 | 0.009336747 |
| 811.479986 | 361.008516  | 8.14746E-06 | 0.0066115   |
| 811.519986 | 282.181829  | 6.36845E-06 | 0.005168125 |
| 811.559986 | 282.482936  | 6.37525E-06 | 0.005173895 |
| 811.599986 | 320.001892  | 7.222E-06   | 0.005861373 |
| 811.639986 | 388.902158  | 8.77698E-06 | 0.007123748 |
| 811.679986 | 418.386212  | 9.44239E-06 | 0.007664202 |
| 811.719986 | 434.113287  | 9.79733E-06 | 0.00795269  |
| 811.759986 | 438.359686  | 9.89317E-06 | 0.008030878 |
| 811.799986 | 417.297009  | 9.41781E-06 | 0.00764538  |
| 811.839986 | 391.095116  | 8.82647E-06 | 0.007165683 |
| 811.879986 | 383.307165  | 8.65071E-06 | 0.007023337 |
| 811.919986 | 374.85913   | 8.46005E-06 | 0.006868882 |
| 811.959986 | 374.736479  | 8.45728E-06 | 0.006866973 |
| 811.999986 | 424.858246  | 9.58846E-06 | 0.007785828 |
| 812.039986 | 531.991576  | 1.20063E-05 | 0.009749603 |
| 812.079986 | 688.78953   | 1.5545E-05  | 0.0126238   |
| 812.119986 | 886.169797  | 1.99996E-05 | 0.016242089 |
| 812.159986 | 1021.954036 | 2.30641E-05 | 0.018731722 |
| 812.199986 | 1114.729577 | 2.51579E-05 | 0.020433241 |
| 812.239986 | 1163.063134 | 2.62487E-05 | 0.021320256 |
| 812.279986 | 1102.462235 | 2.4881E-05  | 0.020210368 |
| 812.319986 | 909.42931   | 2.05246E-05 | 0.016672504 |
| 812.359986 | 699.242748  | 1.57809E-05 | 0.0128198   |
| 812.399986 | 554.837219  | 1.25219E-05 | 0.010172794 |

|            |             |             |             |
|------------|-------------|-------------|-------------|
| 812.439986 | 431.586107  | 9.7403E-06  | 0.007913407 |
| 812.479986 | 353.376965  | 7.97523E-06 | 0.006479711 |
| 812.519986 | 332.534045  | 7.50483E-06 | 0.006097825 |
| 812.559986 | 334.785151  | 7.55563E-06 | 0.006139406 |
| 812.599986 | 339.540972  | 7.66297E-06 | 0.006226927 |
| 812.639986 | 384.292198  | 8.67294E-06 | 0.007047978 |
| 812.679986 | 435.510574  | 9.82887E-06 | 0.007987724 |
| 812.719986 | 442.613919  | 9.98918E-06 | 0.008118406 |
| 812.759986 | 422.11154   | 9.52647E-06 | 0.007742733 |
| 812.799986 | 393.147203  | 8.87278E-06 | 0.007211799 |
| 812.839986 | 362.258289  | 8.17566E-06 | 0.006645507 |
| 812.879986 | 360.641712  | 8.13918E-06 | 0.006616177 |
| 812.919986 | 369.880615  | 8.34769E-06 | 0.006786004 |
| 812.959986 | 421.592814  | 9.51476E-06 | 0.007735121 |
| 812.999986 | 531.95176   | 1.20054E-05 | 0.009760398 |
| 813.039986 | 690.605985  | 1.5586E-05  | 0.012672054 |
| 813.079986 | 894.570395  | 2.01892E-05 | 0.016415441 |
| 813.119986 | 1188.497064 | 2.68227E-05 | 0.021810092 |
| 813.159986 | 1435.30951  | 3.23929E-05 | 0.02634064  |
| 813.199986 | 1523.847109 | 3.43911E-05 | 0.027966847 |
| 813.239986 | 1492.231818 | 3.36776E-05 | 0.027387966 |
| 813.279986 | 1307.723167 | 2.95135E-05 | 0.024002731 |
| 813.319986 | 1065.499252 | 2.40468E-05 | 0.019557771 |
| 813.359986 | 816.858695  | 1.84354E-05 | 0.014994587 |
| 813.399986 | 618.981211  | 1.39695E-05 | 0.011362827 |
| 813.439986 | 466.200032  | 1.05215E-05 | 0.008558597 |
| 813.479986 | 385.89341   | 8.70908E-06 | 0.00708466  |
| 813.519986 | 346.604354  | 7.82238E-06 | 0.00636366  |
| 813.559986 | 331.655581  | 7.485E-06   | 0.0060895   |
| 813.599986 | 348.824847  | 7.87249E-06 | 0.006405059 |
| 813.639986 | 359.381556  | 8.11074E-06 | 0.006599223 |
| 813.679986 | 371.365441  | 8.3812E-06  | 0.006819615 |
| 813.719986 | 372.505515  | 8.40693E-06 | 0.006840887 |
| 813.759986 | 351.990556  | 7.94394E-06 | 0.006464458 |
| 813.799986 | 327.38363   | 7.38859E-06 | 0.006012836 |
| 813.839986 | 297.624514  | 6.71697E-06 | 0.005466539 |
| 813.879986 | 299.527408  | 6.75992E-06 | 0.005501761 |
| 813.919986 | 302.438455  | 6.82561E-06 | 0.005555504 |
| 813.959986 | 320.869003  | 7.24157E-06 | 0.005894345 |
| 813.999986 | 379.820197  | 8.57201E-06 | 0.006977618 |
| 814.039986 | 486.046435  | 1.09694E-05 | 0.008929523 |
| 814.079986 | 635.155958  | 1.43346E-05 | 0.011669499 |
| 814.119986 | 821.839265  | 1.85478E-05 | 0.015100108 |
| 814.159986 | 1021.186228 | 2.30468E-05 | 0.018763742 |
| 814.199986 | 1118.981598 | 2.52539E-05 | 0.020561689 |
| 814.239986 | 1104.508597 | 2.49272E-05 | 0.02029674  |

|            |             |             |             |
|------------|-------------|-------------|-------------|
| 814.279986 | 990.52306   | 2.23547E-05 | 0.018203006 |
| 814.319986 | 833.592845  | 1.8813E-05  | 0.015319826 |
| 814.359986 | 687.391905  | 1.55135E-05 | 0.012633556 |
| 814.399986 | 573.061478  | 1.29332E-05 | 0.010532797 |
| 814.439986 | 485.561639  | 1.09584E-05 | 0.008925    |
| 814.479986 | 438.572948  | 9.89798E-06 | 0.008061707 |
| 814.519986 | 364.909273  | 8.23549E-06 | 0.006707974 |
| 814.559986 | 329.24492   | 7.4306E-06  | 0.006052669 |
| 814.599986 | 374.017867  | 8.44106E-06 | 0.006876089 |
| 814.639986 | 419.804052  | 9.47439E-06 | 0.007718219 |
| 814.679986 | 407.010227  | 9.18565E-06 | 0.007483368 |
| 814.719986 | 362.323325  | 8.17713E-06 | 0.006662073 |
| 814.759986 | 360.357434  | 8.13277E-06 | 0.006626252 |
| 814.799986 | 351.466086  | 7.9321E-06  | 0.006463075 |
| 814.839986 | 360.315261  | 8.13181E-06 | 0.006626127 |
| 814.879986 | 419.418214  | 9.46568E-06 | 0.007713397 |
| 814.919986 | 445.094687  | 1.00452E-05 | 0.008186007 |
| 814.959986 | 457.819048  | 1.03323E-05 | 0.008420442 |
| 814.999986 | 527.379508  | 1.19022E-05 | 0.00970031  |
| 815.039986 | 713.9688    | 1.61133E-05 | 0.013132969 |
| 815.079986 | 950.840364  | 2.14591E-05 | 0.017490918 |
| 815.119986 | 1245.489281 | 2.8109E-05  | 0.022912174 |
| 815.159986 | 1554.204198 | 3.50762E-05 | 0.028592734 |
| 815.199986 | 1716.88628  | 3.87477E-05 | 0.031587151 |
| 815.239986 | 1665.999168 | 3.75993E-05 | 0.030652437 |
| 815.279986 | 1448.914526 | 3.27E-05    | 0.026659641 |
| 815.319986 | 1176.841075 | 2.65597E-05 | 0.021654625 |
| 815.359986 | 948.881895  | 2.14149E-05 | 0.017460887 |
| 815.399986 | 767.686543  | 1.73256E-05 | 0.014127307 |
| 815.439986 | 580.80402   | 1.31079E-05 | 0.010688737 |
| 815.479986 | 445.819381  | 1.00615E-05 | 0.00820497  |
| 815.519986 | 369.864004  | 8.34732E-06 | 0.006807403 |
| 815.559986 | 337.301847  | 7.61243E-06 | 0.006208396 |
| 815.599986 | 347.495138  | 7.84248E-06 | 0.006396328 |
| 815.639986 | 372.123987  | 8.39832E-06 | 0.006850006 |
| 815.679986 | 366.074041  | 8.26178E-06 | 0.00673897  |
| 815.719986 | 352.077714  | 7.9459E-06  | 0.006481632 |
| 815.759986 | 338.10904   | 7.63065E-06 | 0.006224779 |
| 815.799986 | 321.074118  | 7.2462E-06  | 0.005911446 |
| 815.839986 | 308.630909  | 6.96537E-06 | 0.005682627 |
| 815.879986 | 312.399182  | 7.05041E-06 | 0.005752292 |
| 815.919986 | 352.652738  | 7.95888E-06 | 0.00649381  |
| 815.959986 | 394.831503  | 8.9108E-06  | 0.007270854 |
| 815.999986 | 427.631875  | 9.65106E-06 | 0.007875261 |
| 816.039986 | 494.121951  | 1.11516E-05 | 0.009100188 |
| 816.079986 | 623.570099  | 1.40731E-05 | 0.011484782 |

|            |             |             |             |
|------------|-------------|-------------|-------------|
| 816.119986 | 808.368185  | 1.82437E-05 | 0.014889084 |
| 816.159986 | 1021.868385 | 2.30621E-05 | 0.018822401 |
| 816.199986 | 1174.117811 | 2.64982E-05 | 0.021627833 |
| 816.239986 | 1163.706491 | 2.62632E-05 | 0.021437102 |
| 816.279986 | 1060.303467 | 2.39296E-05 | 0.019533231 |
| 816.319986 | 941.174198  | 2.1241E-05  | 0.017339445 |
| 816.359986 | 794.136809  | 1.79226E-05 | 0.014631262 |
| 816.399986 | 619.502155  | 1.39813E-05 | 0.011414334 |
| 816.439986 | 518.041426  | 1.16915E-05 | 0.009545386 |
| 816.479986 | 437.827926  | 9.88117E-06 | 0.008067775 |
| 816.519986 | 377.333603  | 8.51589E-06 | 0.006953398 |
| 816.559986 | 378.71883   | 8.54716E-06 | 0.006979266 |
| 816.599986 | 400.120456  | 9.03016E-06 | 0.00737403  |
| 816.639986 | 398.452125  | 8.99251E-06 | 0.007343643 |
| 816.679986 | 416.982228  | 9.41071E-06 | 0.007685537 |
| 816.719986 | 441.880323  | 9.97262E-06 | 0.008144841 |
| 816.759986 | 415.9074    | 9.38645E-06 | 0.007666477 |
| 816.799986 | 379.29432   | 8.56014E-06 | 0.006991926 |
| 816.839986 | 383.659789  | 8.65867E-06 | 0.007072745 |
| 816.879986 | 401.494157  | 9.06116E-06 | 0.007401883 |
| 816.919986 | 414.194629  | 9.3478E-06  | 0.007636401 |
| 816.959986 | 458.997156  | 1.03589E-05 | 0.008462828 |
| 816.999986 | 540.99702   | 1.22095E-05 | 0.009975202 |
| 817.039986 | 705.445082  | 1.59209E-05 | 0.013008022 |
| 817.079986 | 954.282214  | 2.15368E-05 | 0.017597305 |
| 817.119986 | 1183.219333 | 2.67036E-05 | 0.021820055 |
| 817.159986 | 1337.149393 | 3.01776E-05 | 0.024659927 |
| 817.199986 | 1412.355985 | 3.18749E-05 | 0.026048174 |
| 817.239986 | 1370.110093 | 3.09215E-05 | 0.025270267 |
| 817.279986 | 1260.882649 | 2.84564E-05 | 0.023256818 |
| 817.319986 | 1092.885096 | 2.46649E-05 | 0.020159111 |
| 817.359986 | 884.073315  | 1.99523E-05 | 0.016308214 |
| 817.399986 | 696.87779   | 1.57276E-05 | 0.012855708 |
| 817.439986 | 558.925909  | 1.26142E-05 | 0.010311335 |
| 817.479986 | 451.060326  | 1.01798E-05 | 0.008321785 |
| 817.519986 | 374.402884  | 8.44975E-06 | 0.006907841 |
| 817.559986 | 327.343028  | 7.38768E-06 | 0.006039868 |
| 817.599986 | 346.961293  | 7.83043E-06 | 0.006402162 |
| 817.639986 | 402.574857  | 9.08555E-06 | 0.007428712 |
| 817.679986 | 410.677756  | 9.26842E-06 | 0.007578606 |
| 817.719986 | 383.678378  | 8.65909E-06 | 0.007080708 |
| 817.759986 | 365.323679  | 8.24485E-06 | 0.006742306 |
| 817.799986 | 334.96625   | 7.55972E-06 | 0.00618234  |
| 817.839986 | 307.005029  | 6.92868E-06 | 0.005666548 |
| 817.879986 | 283.463929  | 6.39739E-06 | 0.005232294 |
| 817.919986 | 309.260273  | 6.97957E-06 | 0.005708733 |

|            |             |             |             |
|------------|-------------|-------------|-------------|
| 817.959986 | 366.414605  | 8.26947E-06 | 0.006764093 |
| 817.999986 | 429.718089  | 9.69814E-06 | 0.007933077 |
| 818.039986 | 541.107943  | 1.22121E-05 | 0.009989947 |
| 818.079986 | 689.595799  | 1.55632E-05 | 0.012731956 |
| 818.119986 | 825.666584  | 1.86341E-05 | 0.015244966 |
| 818.159986 | 966.419346  | 2.18107E-05 | 0.017844674 |
| 818.199986 | 1046.611262 | 2.36206E-05 | 0.019326341 |
| 818.239986 | 1030.646682 | 2.32603E-05 | 0.019032475 |
| 818.279986 | 956.523026  | 2.15874E-05 | 0.017664531 |
| 818.319986 | 809.278862  | 1.82643E-05 | 0.014946039 |
| 818.359986 | 640.634022  | 1.44582E-05 | 0.011832027 |
| 818.399986 | 498.459384  | 1.12495E-05 | 0.009206618 |
| 818.439986 | 418.973831  | 9.45566E-06 | 0.007738887 |
| 818.479986 | 359.014528  | 8.10246E-06 | 0.0066317   |
| 818.519986 | 336.568998  | 7.59589E-06 | 0.006217391 |
| 818.559986 | 337.58003   | 7.61871E-06 | 0.006236372 |
| 818.599986 | 329.057577  | 7.42637E-06 | 0.006079227 |
| 818.639986 | 324.088332  | 7.31422E-06 | 0.005987715 |
| 818.679986 | 333.926146  | 7.53625E-06 | 0.006169775 |
| 818.719986 | 352.13237   | 7.94714E-06 | 0.00650648  |
| 818.759986 | 356.417596  | 8.04385E-06 | 0.006585981 |
| 818.799986 | 353.385328  | 7.97541E-06 | 0.006530269 |
| 818.839986 | 365.985629  | 8.25979E-06 | 0.006763443 |
| 818.879986 | 380.019159  | 8.5765E-06  | 0.007023127 |
| 818.919986 | 415.882902  | 9.3859E-06  | 0.007686299 |
| 818.959986 | 470.973452  | 1.06292E-05 | 0.008704902 |
| 818.999986 | 558.248688  | 1.25989E-05 | 0.010318495 |
| 819.039986 | 708.825422  | 1.59972E-05 | 0.013102348 |
| 819.079986 | 953.874965  | 2.15276E-05 | 0.01763285  |
| 819.119986 | 1227.494614 | 2.77028E-05 | 0.022691953 |
| 819.159986 | 1393.835419 | 3.14569E-05 | 0.025768253 |
| 819.199986 | 1383.598217 | 3.12259E-05 | 0.025580244 |
| 819.239986 | 1292.814067 | 2.9177E-05  | 0.023902976 |
| 819.279986 | 1206.233634 | 2.7223E-05  | 0.02230327  |
| 819.319986 | 1071.355189 | 2.4179E-05  | 0.019810333 |
| 819.359986 | 845.119914  | 1.90732E-05 | 0.0156278   |
| 819.399986 | 646.875755  | 1.45991E-05 | 0.01196249  |
| 819.439986 | 516.581172  | 1.16585E-05 | 0.009553455 |
| 819.479986 | 438.509621  | 9.89655E-06 | 0.008110026 |
| 819.519986 | 396.266966  | 8.94319E-06 | 0.007329126 |
| 819.559986 | 337.047682  | 7.6067E-06  | 0.006234144 |
| 819.599986 | 340.773646  | 7.69079E-06 | 0.006303369 |
| 819.639986 | 375.487993  | 8.47424E-06 | 0.006945827 |
| 819.679986 | 394.830701  | 8.91078E-06 | 0.007303987 |
| 819.719986 | 393.940564  | 8.89069E-06 | 0.007287876 |
| 819.759986 | 362.415699  | 8.17922E-06 | 0.006704995 |

|            |             |             |             |
|------------|-------------|-------------|-------------|
| 819.799986 | 342.582796  | 7.73162E-06 | 0.006338379 |
| 819.839986 | 316.004511  | 7.13178E-06 | 0.00584692  |
| 819.879986 | 306.790402  | 6.92383E-06 | 0.005676711 |
| 819.919986 | 323.032547  | 7.29039E-06 | 0.00597754  |
| 819.959986 | 370.127594  | 8.35326E-06 | 0.006849342 |
| 819.999986 | 426.33244   | 9.62173E-06 | 0.007889818 |
| 820.039986 | 508.441305  | 1.14748E-05 | 0.009409805 |
| 820.079986 | 650.985464  | 1.46918E-05 | 0.01204848  |
| 820.119986 | 791.779834  | 1.78694E-05 | 0.014655026 |
| 820.159986 | 942.456009  | 2.12699E-05 | 0.017444737 |
| 820.199986 | 1064.93661  | 2.40341E-05 | 0.019712798 |
| 820.239986 | 1099.678294 | 2.48182E-05 | 0.020356886 |
| 820.279986 | 1011.732603 | 2.28334E-05 | 0.018729777 |
| 820.319986 | 840.959429  | 1.89793E-05 | 0.015569085 |
| 820.359986 | 703.881429  | 1.58856E-05 | 0.01303193  |
| 820.399986 | 600.492667  | 1.35523E-05 | 0.011118293 |
| 820.439986 | 502.134745  | 1.13325E-05 | 0.009297621 |
| 820.479986 | 412.890697  | 9.31837E-06 | 0.007645534 |
| 820.519986 | 340.635163  | 7.68766E-06 | 0.00630788  |
| 820.559986 | 336.598816  | 7.59657E-06 | 0.006233438 |
| 820.599986 | 398.077788  | 8.98406E-06 | 0.00737232  |
| 820.639986 | 436.613826  | 9.85377E-06 | 0.008086394 |
| 820.679986 | 433.855903  | 9.79152E-06 | 0.008035707 |
| 820.719986 | 438.111361  | 9.88756E-06 | 0.008114921 |
| 820.759986 | 435.628292  | 9.83152E-06 | 0.008069321 |
| 820.799986 | 417.530738  | 9.42309E-06 | 0.00773447  |
| 820.839986 | 364.483413  | 8.22588E-06 | 0.006752134 |
| 820.879986 | 334.300395  | 7.54469E-06 | 0.006193289 |
| 820.919986 | 353.799698  | 7.98477E-06 | 0.006554854 |
| 820.959986 | 414.50995   | 9.35491E-06 | 0.007680009 |
| 820.999986 | 577.447602  | 1.30322E-05 | 0.010699426 |
| 821.039986 | 820.693665  | 1.85219E-05 | 0.015207231 |
| 821.079986 | 1078.878617 | 2.43488E-05 | 0.019992302 |
| 821.119986 | 1265.797284 | 2.85673E-05 | 0.023457166 |
| 821.159986 | 1393.749014 | 3.1455E-05  | 0.025829566 |
| 821.199986 | 1438.92264  | 3.24745E-05 | 0.026668042 |
| 821.239986 | 1366.216599 | 3.08336E-05 | 0.02532179  |
| 821.279986 | 1210.349727 | 2.73159E-05 | 0.022434008 |
| 821.319986 | 1011.81618  | 2.28353E-05 | 0.018755073 |
| 821.359986 | 791.899538  | 1.78721E-05 | 0.014679403 |
| 821.399986 | 611.818532  | 1.38079E-05 | 0.011341802 |
| 821.439986 | 490.750822  | 1.10756E-05 | 0.00909791  |
| 821.479986 | 385.27862   | 8.6952E-06  | 0.007142934 |
| 821.519986 | 313.095603  | 7.06613E-06 | 0.005804968 |
| 821.559986 | 283.085842  | 6.38885E-06 | 0.005248826 |
| 821.599986 | 297.788278  | 6.72067E-06 | 0.0055217   |

|            |             |             |             |
|------------|-------------|-------------|-------------|
| 821.639986 | 325.788791  | 7.3526E-06  | 0.00604119  |
| 821.679986 | 358.727246  | 8.09597E-06 | 0.0066523   |
| 821.719986 | 398.801322  | 9.00039E-06 | 0.007395801 |
| 821.759986 | 341.406015  | 7.70506E-06 | 0.006331709 |
| 821.799986 | 286.009737  | 6.45484E-06 | 0.005304589 |
| 821.839986 | 273.163587  | 6.16492E-06 | 0.005066579 |
| 821.879986 | 279.513259  | 6.30822E-06 | 0.005184604 |
| 821.919986 | 283.534362  | 6.39898E-06 | 0.005259446 |
| 821.959986 | 320.651232  | 7.23665E-06 | 0.005948238 |
| 821.999986 | 400.785204  | 9.04516E-06 | 0.007435125 |
| 822.039986 | 511.551275  | 1.1545E-05  | 0.009490451 |
| 822.079986 | 673.311975  | 1.51957E-05 | 0.012492092 |
| 822.119986 | 875.839502  | 1.97665E-05 | 0.016250416 |
| 822.159986 | 1077.407097 | 2.43156E-05 | 0.019991295 |
| 822.199986 | 1190.351853 | 2.68646E-05 | 0.02208806  |
| 822.239986 | 1167.735706 | 2.63542E-05 | 0.021669451 |
| 822.279986 | 1046.699808 | 2.36226E-05 | 0.019424356 |
| 822.319986 | 855.201556  | 1.93007E-05 | 0.015871358 |
| 822.359986 | 660.545178  | 1.49076E-05 | 0.012259401 |
| 822.399986 | 514.372293  | 1.16087E-05 | 0.009546967 |
| 822.439986 | 406.614277  | 9.17672E-06 | 0.0075473   |
| 822.479986 | 335.985343  | 7.58272E-06 | 0.006236636 |
| 822.519986 | 322.06496   | 7.26856E-06 | 0.005978534 |
| 822.559986 | 342.495913  | 7.72966E-06 | 0.006358105 |
| 822.599986 | 372.893052  | 8.41568E-06 | 0.006922736 |
| 822.639986 | 397.975128  | 8.98174E-06 | 0.007388742 |
| 822.679986 | 410.954249  | 9.27466E-06 | 0.007630081 |
| 822.719986 | 421.712981  | 9.51747E-06 | 0.007830217 |
| 822.759986 | 406.550417  | 9.17528E-06 | 0.00754905  |
| 822.799986 | 375.779884  | 8.48083E-06 | 0.006978026 |
| 822.839986 | 353.683224  | 7.98214E-06 | 0.006568022 |
| 822.879986 | 367.482474  | 8.29357E-06 | 0.006824611 |
| 822.919986 | 420.40886   | 9.48804E-06 | 0.0078079   |
| 822.959986 | 504.015016  | 1.13749E-05 | 0.009361101 |
| 822.999986 | 632.289544  | 1.42699E-05 | 0.011744123 |
| 823.039986 | 810.890865  | 1.83007E-05 | 0.015062189 |
| 823.079986 | 1004.755218 | 2.26759E-05 | 0.018664101 |
| 823.119986 | 1195.796068 | 2.69875E-05 | 0.022213911 |
| 823.159986 | 1410.940107 | 3.1843E-05  | 0.026211845 |
| 823.199986 | 1565.418561 | 3.53293E-05 | 0.029083093 |
| 823.239986 | 1580.268593 | 3.56645E-05 | 0.02936041  |
| 823.279986 | 1482.082523 | 3.34485E-05 | 0.027537512 |
| 823.319986 | 1253.370182 | 2.82868E-05 | 0.023289104 |
| 823.359986 | 1013.28634  | 2.28685E-05 | 0.018828976 |
| 823.399986 | 825.226138  | 1.86242E-05 | 0.01533517  |
| 823.439986 | 615.489625  | 1.38907E-05 | 0.011438194 |

|            |             |             |             |
|------------|-------------|-------------|-------------|
| 823.479986 | 448.569544  | 1.01236E-05 | 0.008336574 |
| 823.519986 | 358.323033  | 8.08685E-06 | 0.006659684 |
| 823.559986 | 335.101316  | 7.56277E-06 | 0.006228395 |
| 823.599986 | 334.835283  | 7.55677E-06 | 0.006223752 |
| 823.639986 | 338.443814  | 7.63821E-06 | 0.006291131 |
| 823.679986 | 361.889871  | 8.16735E-06 | 0.006727283 |
| 823.719986 | 355.462494  | 8.02229E-06 | 0.006608123 |
| 823.759986 | 334.679792  | 7.55326E-06 | 0.006222071 |
| 823.799986 | 324.051195  | 7.31338E-06 | 0.006024766 |
| 823.839986 | 316.152794  | 7.13513E-06 | 0.005878204 |
| 823.879986 | 299.681268  | 6.76339E-06 | 0.005572221 |
| 823.919986 | 316.384463  | 7.14036E-06 | 0.005883083 |
| 823.959986 | 354.784575  | 8.00699E-06 | 0.006597442 |
| 823.999986 | 419.860646  | 9.47567E-06 | 0.007807952 |
| 824.039986 | 547.647151  | 1.23596E-05 | 0.010184832 |
| 824.079986 | 702.682765  | 1.58586E-05 | 0.013068731 |
| 824.119986 | 858.12092   | 1.93666E-05 | 0.015960397 |
| 824.159986 | 1064.45065  | 2.40232E-05 | 0.019798934 |
| 824.199986 | 1172.212169 | 2.64552E-05 | 0.021804372 |
| 824.239986 | 1162.430378 | 2.62344E-05 | 0.02162347  |
| 824.279986 | 1126.816807 | 2.54307E-05 | 0.020962005 |
| 824.319986 | 996.873182  | 2.2498E-05  | 0.018545583 |
| 824.359986 | 836.836314  | 1.88862E-05 | 0.015569052 |
| 824.399986 | 725.175467  | 1.63662E-05 | 0.013492295 |
| 824.439986 | 599.873341  | 1.35383E-05 | 0.011161521 |
| 824.479986 | 443.157817  | 1.00015E-05 | 0.008245999 |
| 824.519986 | 348.117699  | 7.85653E-06 | 0.006477867 |
| 824.559986 | 312.844326  | 7.06046E-06 | 0.005821773 |
| 824.599986 | 342.921428  | 7.73926E-06 | 0.006381793 |
| 824.639986 | 411.045102  | 9.27672E-06 | 0.00764995  |
| 824.679986 | 417.037815  | 9.41196E-06 | 0.007761857 |
| 824.719986 | 385.219439  | 8.69387E-06 | 0.007170005 |
| 824.759986 | 364.796241  | 8.23294E-06 | 0.006790202 |
| 824.799986 | 340.87151   | 7.693E-06   | 0.006345182 |
| 824.839986 | 329.395503  | 7.434E-06   | 0.006131859 |
| 824.879986 | 310.884566  | 7.01623E-06 | 0.005787549 |
| 824.919986 | 325.852692  | 7.35404E-06 | 0.006066496 |
| 824.959986 | 420.215486  | 9.48368E-06 | 0.007823655 |
| 824.999986 | 558.884071  | 1.26132E-05 | 0.010405919 |
| 825.039986 | 736.383491  | 1.66191E-05 | 0.013711463 |
| 825.079986 | 931.908951  | 2.10319E-05 | 0.017352989 |
| 825.119986 | 1123.514815 | 2.53562E-05 | 0.020921878 |
| 825.159986 | 1344.480768 | 3.03431E-05 | 0.025037878 |
| 825.199986 | 1388.348573 | 3.13331E-05 | 0.025856068 |
| 825.239986 | 1287.55863  | 2.90584E-05 | 0.023980158 |
| 825.279986 | 1180.798634 | 2.6649E-05  | 0.02199287  |



|            |             |             |             |
|------------|-------------|-------------|-------------|
| 825.319986 | 1030.09996  | 2.32479E-05 | 0.019186974 |
| 825.359986 | 854.69904   | 1.92894E-05 | 0.015920672 |
| 825.399986 | 678.937158  | 1.53227E-05 | 0.012647328 |
| 825.439986 | 552.752482  | 1.24749E-05 | 0.010297243 |
| 825.479986 | 439.81616   | 9.92604E-06 | 0.008193746 |
| 825.519986 | 351.283068  | 7.92797E-06 | 0.006544697 |
| 825.559986 | 330.427065  | 7.45728E-06 | 0.006156431 |
| 825.599986 | 355.266223  | 8.01786E-06 | 0.006619548 |
| 825.639986 | 366.014025  | 8.26043E-06 | 0.006820139 |
| 825.679986 | 383.893265  | 8.66394E-06 | 0.007153639 |
| 825.719986 | 366.738972  | 8.27679E-06 | 0.006834309 |
| 825.759986 | 334.715576  | 7.55406E-06 | 0.006237844 |
| 825.799986 | 303.98556   | 6.86053E-06 | 0.005665426 |
| 825.839986 | 269.135453  | 6.07401E-06 | 0.005016162 |
| 825.879986 | 253.315339  | 5.71697E-06 | 0.004721535 |
| 825.919986 | 272.046489  | 6.13971E-06 | 0.005070909 |
| 825.959986 | 307.251738  | 6.93424E-06 | 0.005727408 |
| 825.999986 | 382.993459  | 8.64363E-06 | 0.007139637 |
| 826.039986 | 529.663822  | 1.19538E-05 | 0.009874296 |
| 826.079986 | 705.814756  | 1.59293E-05 | 0.01315884  |
| 826.119986 | 836.123746  | 1.88701E-05 | 0.015589007 |
| 826.159986 | 928.08685   | 2.09456E-05 | 0.017304439 |
| 826.199986 | 1003.788338 | 2.26541E-05 | 0.018716821 |
| 826.239986 | 1035.612871 | 2.33723E-05 | 0.019311162 |
| 826.279986 | 962.306347  | 2.17179E-05 | 0.017945078 |
| 826.319986 | 817.790854  | 1.84564E-05 | 0.015250893 |
| 826.359986 | 665.895643  | 1.50283E-05 | 0.012418816 |
| 826.399986 | 543.040332  | 1.22557E-05 | 0.01012808  |
| 826.439986 | 438.037223  | 9.88589E-06 | 0.008170095 |
| 826.479986 | 348.53369   | 7.86592E-06 | 0.006501025 |
| 826.519986 | 291.391039  | 6.57629E-06 | 0.005435435 |
| 826.559986 | 254.7321    | 5.74895E-06 | 0.004751851 |
| 826.599986 | 257.856461  | 5.81946E-06 | 0.004810367 |
| 826.639986 | 303.929618  | 6.85927E-06 | 0.005670145 |
| 826.679986 | 379.689878  | 8.56907E-06 | 0.00708388  |
| 826.719986 | 411.919109  | 9.29644E-06 | 0.007685553 |
| 826.759986 | 441.240326  | 9.95818E-06 | 0.008233024 |
| 826.799986 | 435.462441  | 9.82778E-06 | 0.008125609 |
| 826.839986 | 362.265362  | 8.17582E-06 | 0.006760099 |
| 826.879986 | 344.041415  | 7.76454E-06 | 0.006420339 |
| 826.919986 | 361.765001  | 8.16453E-06 | 0.006751415 |
| 826.959986 | 425.284251  | 9.59807E-06 | 0.007937222 |
| 826.999986 | 508.84806   | 1.1484E-05  | 0.009497261 |
| 827.039986 | 610.202192  | 1.37714E-05 | 0.01138951  |
| 827.079986 | 786.952484  | 1.77604E-05 | 0.014689289 |
| 827.119986 | 986.190741  | 2.2257E-05  | 0.018409169 |

|            |             |             |             |
|------------|-------------|-------------|-------------|
| 827.159986 | 1191.660604 | 2.68941E-05 | 0.02224574  |
| 827.199986 | 1301.808649 | 2.938E-05   | 0.024303142 |
| 827.239986 | 1314.737324 | 2.96718E-05 | 0.024545691 |
| 827.279986 | 1253.772167 | 2.82959E-05 | 0.023408625 |
| 827.319986 | 1060.343479 | 2.39305E-05 | 0.019798161 |
| 827.359986 | 829.221733  | 1.87144E-05 | 0.015483529 |
| 827.399986 | 621.952256  | 1.40366E-05 | 0.011613879 |
| 827.439986 | 477.729721  | 1.07817E-05 | 0.008921205 |
| 827.479986 | 420.801907  | 9.49691E-06 | 0.007858505 |
| 827.519986 | 381.844611  | 8.6177E-06  | 0.00713132  |
| 827.559986 | 341.146604  | 7.6992E-06  | 0.006371553 |
| 827.599986 | 330.428675  | 7.45731E-06 | 0.006171674 |
| 827.639986 | 325.811184  | 7.3531E-06  | 0.006085723 |
| 827.679986 | 321.43228   | 7.25428E-06 | 0.006004221 |
| 827.719986 | 302.883562  | 6.83566E-06 | 0.005658012 |
| 827.759986 | 296.343174  | 6.68805E-06 | 0.005536102 |
| 827.799986 | 305.405292  | 6.89257E-06 | 0.005705671 |
| 827.839986 | 326.399383  | 7.36638E-06 | 0.006098183 |
| 827.879986 | 340.273914  | 7.67951E-06 | 0.006357711 |
| 827.919986 | 340.235589  | 7.67864E-06 | 0.006357302 |
| 827.959986 | 341.863326  | 7.71538E-06 | 0.006388025 |
| 827.999986 | 374.000387  | 8.44067E-06 | 0.006988873 |
| 828.039986 | 482.087867  | 1.08801E-05 | 0.009009118 |
| 828.079986 | 692.538514  | 1.56296E-05 | 0.012942583 |
| 828.119986 | 878.25029   | 1.98209E-05 | 0.016414072 |
| 828.159986 | 1018.333848 | 2.29824E-05 | 0.019033085 |
| 828.199986 | 1107.199973 | 2.4988E-05  | 0.020695029 |
| 828.239986 | 1104.445166 | 2.49258E-05 | 0.020644535 |
| 828.279986 | 1030.642962 | 2.32602E-05 | 0.019265938 |
| 828.319986 | 907.904621  | 2.04901E-05 | 0.016972395 |
| 828.359986 | 766.404345  | 1.72967E-05 | 0.014327876 |
| 828.399986 | 624.688791  | 1.40984E-05 | 0.011679078 |
| 828.439986 | 524.783965  | 1.18436E-05 | 0.009811748 |
| 828.479986 | 440.830889  | 9.94894E-06 | 0.008242497 |
| 828.519986 | 392.516381  | 8.85855E-06 | 0.007339484 |
| 828.559986 | 390.197722  | 8.80622E-06 | 0.007296481 |
| 828.599986 | 442.666574  | 9.99037E-06 | 0.008278019 |
| 828.639986 | 512.502161  | 1.15665E-05 | 0.009584431 |
| 828.679986 | 548.973708  | 1.23896E-05 | 0.01026699  |
| 828.719986 | 575.540713  | 1.29892E-05 | 0.01076437  |
| 828.759986 | 596.579512  | 1.3464E-05  | 0.011158398 |
| 828.799986 | 612.448484  | 1.38221E-05 | 0.011455764 |
| 828.839986 | 649.151777  | 1.46505E-05 | 0.01214288  |
| 828.879986 | 735.424519  | 1.65975E-05 | 0.013757341 |
| 828.919986 | 832.816419  | 1.87955E-05 | 0.015579971 |
| 828.959986 | 936.03446   | 2.1125E-05  | 0.017511775 |

|            |             |             |             |
|------------|-------------|-------------|-------------|
| 828.999986 | 1204.713866 | 2.71887E-05 | 0.022539443 |
| 829.039986 | 1662.457681 | 3.75194E-05 | 0.031105045 |
| 829.079986 | 2216.594861 | 5.00255E-05 | 0.041475106 |
| 829.119986 | 2838.752867 | 6.40667E-05 | 0.05311898  |
| 829.159986 | 3425.681704 | 7.73129E-05 | 0.064104734 |
| 829.199986 | 3730.000106 | 8.41809E-05 | 0.069802807 |
| 829.239986 | 3658.719839 | 8.25722E-05 | 0.068472179 |
| 829.279986 | 3166.267316 | 7.14582E-05 | 0.059258891 |
| 829.319986 | 2448.284939 | 5.52544E-05 | 0.045823562 |
| 829.359986 | 1737.302749 | 3.92085E-05 | 0.032517964 |
| 829.399986 | 1131.091255 | 2.55272E-05 | 0.021172221 |
| 829.439986 | 726.81666   | 1.64032E-05 | 0.013605503 |
| 829.479986 | 533.940929  | 1.20503E-05 | 0.009995485 |
| 829.519986 | 447.830842  | 1.01069E-05 | 0.008383891 |
| 829.559986 | 418.878483  | 9.4535E-06  | 0.007842249 |
| 829.599986 | 383.63423   | 8.65809E-06 | 0.007182752 |
| 829.639986 | 362.675553  | 8.18508E-06 | 0.006790671 |
| 829.679986 | 398.634161  | 8.99662E-06 | 0.007464314 |
| 829.719986 | 408.136175  | 9.21106E-06 | 0.007642605 |
| 829.759986 | 368.900771  | 8.32558E-06 | 0.00690823  |
| 829.799986 | 348.670828  | 7.86901E-06 | 0.006529708 |
| 829.839986 | 367.187679  | 8.28691E-06 | 0.006876813 |
| 829.879986 | 406.82589   | 9.18149E-06 | 0.007619538 |
| 829.919986 | 438.139593  | 9.8882E-06  | 0.008206415 |
| 829.959986 | 502.099549  | 1.13317E-05 | 0.009404847 |
| 829.999986 | 634.570016  | 1.43214E-05 | 0.01188673  |
| 830.039986 | 839.874534  | 1.89548E-05 | 0.015733241 |
| 830.079986 | 1110.612851 | 2.5065E-05  | 0.020805942 |
| 830.119986 | 1412.09274  | 3.1869E-05  | 0.026455066 |
| 830.159986 | 1695.074713 | 3.82555E-05 | 0.031758165 |
| 830.199986 | 1871.747587 | 4.22427E-05 | 0.035069919 |
| 830.239986 | 1831.596367 | 4.13366E-05 | 0.034319281 |
| 830.279986 | 1636.130568 | 3.69252E-05 | 0.030658245 |
| 830.319986 | 1301.341348 | 2.93695E-05 | 0.024386051 |
| 830.359986 | 948.587012  | 2.14083E-05 | 0.017776585 |
| 830.399986 | 677.699159  | 1.52947E-05 | 0.01270074  |
| 830.439986 | 500.483578  | 1.12952E-05 | 0.00938     |
| 830.479986 | 369.760062  | 8.34497E-06 | 0.00693033  |
| 830.519986 | 306.472483  | 6.91666E-06 | 0.005744422 |
| 830.559986 | 315.654829  | 7.12389E-06 | 0.005916818 |
| 830.599986 | 357.187244  | 8.06122E-06 | 0.006695648 |
| 830.639986 | 408.668039  | 9.22307E-06 | 0.007661049 |
| 830.679986 | 444.355123  | 1.00285E-05 | 0.008330454 |
| 830.719986 | 405.916854  | 9.16098E-06 | 0.007610208 |
| 830.759986 | 407.847096  | 9.20454E-06 | 0.007646764 |
| 830.799986 | 412.015577  | 9.29862E-06 | 0.007725291 |

|            |             |             |             |
|------------|-------------|-------------|-------------|
| 830.839986 | 397.973954  | 8.98172E-06 | 0.00746237  |
| 830.879986 | 394.733101  | 8.90858E-06 | 0.007401958 |
| 830.919986 | 417.962838  | 9.43284E-06 | 0.007837935 |
| 830.959986 | 483.709278  | 1.09166E-05 | 0.009071295 |
| 830.999986 | 660.831406  | 1.4914E-05  | 0.012393571 |
| 831.039986 | 903.782355  | 2.03971E-05 | 0.016950813 |
| 831.079986 | 1122.730492 | 2.53385E-05 | 0.02105829  |
| 831.119986 | 1412.459847 | 3.18773E-05 | 0.026493821 |
| 831.159986 | 1729.405204 | 3.90303E-05 | 0.032440396 |
| 831.199986 | 1883.990813 | 4.2519E-05  | 0.035341832 |
| 831.239986 | 1878.165104 | 4.23876E-05 | 0.035234243 |
| 831.279986 | 1649.445357 | 3.72257E-05 | 0.030944966 |
| 831.319986 | 1332.732044 | 3.00779E-05 | 0.025004364 |
| 831.359986 | 1021.142696 | 2.30458E-05 | 0.01915933  |
| 831.399986 | 794.819126  | 1.7938E-05  | 0.01491362  |
| 831.439986 | 621.491819  | 1.40262E-05 | 0.011661947 |
| 831.479986 | 490.108044  | 1.10611E-05 | 0.009197047 |
| 831.519986 | 407.107514  | 9.18785E-06 | 0.007639881 |
| 831.559986 | 368.449904  | 8.3154E-06  | 0.006914755 |
| 831.599986 | 347.8276    | 7.84998E-06 | 0.006528047 |
| 831.639986 | 356.698852  | 8.0502E-06  | 0.006694865 |
| 831.679986 | 433.690722  | 9.7878E-06  | 0.008140314 |
| 831.719986 | 480.702575  | 1.08488E-05 | 0.009023153 |
| 831.759986 | 471.983717  | 1.0652E-05  | 0.00885992  |
| 831.799986 | 428.496357  | 9.67057E-06 | 0.008043977 |
| 831.839986 | 367.634224  | 8.29699E-06 | 0.00690177  |
| 831.879986 | 325.511486  | 7.34634E-06 | 0.006111274 |
| 831.919986 | 323.783356  | 7.30734E-06 | 0.006079122 |
| 831.959986 | 360.041615  | 8.12564E-06 | 0.006760205 |
| 831.999986 | 435.296727  | 9.82404E-06 | 0.008173602 |
| 832.039986 | 558.870492  | 1.26129E-05 | 0.010494461 |
| 832.079986 | 728.743444  | 1.64467E-05 | 0.01368499  |
| 832.119986 | 889.264007  | 2.00694E-05 | 0.01670019  |
| 832.159986 | 1074.072731 | 2.42403E-05 | 0.020171829 |
| 832.199986 | 1252.885842 | 2.82759E-05 | 0.023531194 |
| 832.239986 | 1268.572094 | 2.86299E-05 | 0.023826952 |
| 832.279986 | 1136.246427 | 2.56435E-05 | 0.021342571 |
| 832.319986 | 953.745223  | 2.15247E-05 | 0.017915439 |
| 832.359986 | 736.682331  | 1.66259E-05 | 0.013838729 |
| 832.399986 | 526.048162  | 1.18722E-05 | 0.009882398 |
| 832.439986 | 399.99481   | 9.02733E-06 | 0.007514707 |
| 832.479986 | 352.033204  | 7.9449E-06  | 0.006613969 |
| 832.519986 | 326.366372  | 7.36563E-06 | 0.006132038 |
| 832.559986 | 298.515343  | 6.73708E-06 | 0.005609019 |
| 832.599986 | 306.075471  | 6.9077E-06  | 0.005751348 |
| 832.639986 | 363.285818  | 8.19885E-06 | 0.006826694 |

|            |             |             |             |
|------------|-------------|-------------|-------------|
| 832.679986 | 428.663903  | 9.67435E-06 | 0.008055635 |
| 832.719986 | 428.387005  | 9.6681E-06  | 0.008050818 |
| 832.759986 | 402.343674  | 9.08034E-06 | 0.007561741 |
| 832.799986 | 375.656839  | 8.47805E-06 | 0.007060521 |
| 832.839986 | 356.866058  | 8.05397E-06 | 0.006707668 |
| 832.879986 | 367.278884  | 8.28897E-06 | 0.00690372  |
| 832.919986 | 389.492352  | 8.7903E-06  | 0.007321616 |
| 832.959986 | 435.415588  | 9.82672E-06 | 0.008185267 |
| 832.999986 | 565.254777  | 1.2757E-05  | 0.010626592 |
| 833.039986 | 746.348022  | 1.6844E-05  | 0.014031755 |
| 833.079986 | 933.769903  | 2.10739E-05 | 0.017556233 |
| 833.119986 | 1173.702099 | 2.64888E-05 | 0.022068367 |
| 833.159986 | 1358.274522 | 3.06544E-05 | 0.02553999  |
| 833.199986 | 1413.348927 | 3.18973E-05 | 0.026576844 |
| 833.239986 | 1398.066066 | 3.15524E-05 | 0.026290724 |
| 833.279986 | 1328.59025  | 2.99844E-05 | 0.024985427 |
| 833.319986 | 1138.537645 | 2.56952E-05 | 0.021412331 |
| 833.359986 | 907.935255  | 2.04908E-05 | 0.017076241 |
| 833.399986 | 676.089157  | 1.52584E-05 | 0.012716342 |
| 833.439986 | 501.309253  | 1.13139E-05 | 0.009429416 |
| 833.479986 | 422.567308  | 9.53676E-06 | 0.007948695 |
| 833.519986 | 406.79254   | 9.18074E-06 | 0.007652331 |
| 833.559986 | 380.69932   | 8.59185E-06 | 0.007161825 |
| 833.599986 | 356.568899  | 8.04726E-06 | 0.006708199 |
| 833.639986 | 360.470468  | 8.13532E-06 | 0.006781925 |
| 833.679986 | 397.814247  | 8.97811E-06 | 0.007484873 |
| 833.719986 | 404.380447  | 9.1263E-06  | 0.007608782 |
| 833.759986 | 368.574041  | 8.3182E-06  | 0.006935385 |
| 833.799986 | 343.088268  | 7.74302E-06 | 0.006456134 |
| 833.839986 | 313.596694  | 7.07744E-06 | 0.005901453 |
| 833.879986 | 278.381591  | 6.28268E-06 | 0.005239005 |
| 833.919986 | 280.683857  | 6.33464E-06 | 0.005282586 |
| 833.959986 | 335.777401  | 7.57803E-06 | 0.006319772 |
| 833.999986 | 432.394249  | 9.75854E-06 | 0.008138619 |
| 834.039986 | 515.733787  | 1.16394E-05 | 0.009707719 |
| 834.079986 | 656.114025  | 1.48076E-05 | 0.012350706 |
| 834.119986 | 811.70846   | 1.83191E-05 | 0.015280352 |
| 834.159986 | 923.67234   | 2.0846E-05  | 0.017388898 |
| 834.199986 | 1059.94156  | 2.39214E-05 | 0.019955235 |
| 834.239986 | 1096.279998 | 2.47415E-05 | 0.020640359 |
| 834.279986 | 1018.275457 | 2.29811E-05 | 0.019172637 |
| 834.319986 | 926.27902   | 2.09048E-05 | 0.017441315 |
| 834.359986 | 783.707811  | 1.76872E-05 | 0.014757487 |
| 834.399986 | 643.897584  | 1.45319E-05 | 0.012125393 |
| 834.439986 | 517.328106  | 1.16754E-05 | 0.0097424   |
| 834.479986 | 419.29986   | 9.46301E-06 | 0.007896696 |

|            |             |             |             |
|------------|-------------|-------------|-------------|
| 834.519986 | 367.747927  | 8.29956E-06 | 0.006926147 |
| 834.559986 | 356.211203  | 8.03919E-06 | 0.006709187 |
| 834.599986 | 372.727478  | 8.41194E-06 | 0.007020605 |
| 834.639986 | 384.021946  | 8.66684E-06 | 0.007233692 |
| 834.679986 | 405.338097  | 9.14792E-06 | 0.007635583 |
| 834.719986 | 413.239934  | 9.32625E-06 | 0.007784807 |
| 834.759986 | 388.491214  | 8.76771E-06 | 0.00731893  |
| 834.799986 | 382.341844  | 8.62892E-06 | 0.007203425 |
| 834.839986 | 391.075733  | 8.82603E-06 | 0.007368327 |
| 834.879986 | 396.026284  | 8.93776E-06 | 0.007461958 |
| 834.919986 | 405.075355  | 9.14199E-06 | 0.007632827 |
| 834.959986 | 458.830625  | 1.03552E-05 | 0.008646151 |
| 834.999986 | 560.97118   | 1.26603E-05 | 0.010571382 |
| 835.039986 | 678.35575   | 1.53095E-05 | 0.012784082 |
| 835.079986 | 841.285416  | 1.89866E-05 | 0.015855363 |
| 835.119986 | 1039.14117  | 2.3452E-05  | 0.019585208 |
| 835.159986 | 1243.768542 | 2.80701E-05 | 0.023443044 |
| 835.199986 | 1358.625304 | 3.06623E-05 | 0.025609136 |
| 835.239986 | 1343.886159 | 3.03296E-05 | 0.025332527 |
| 835.279986 | 1200.545964 | 2.70947E-05 | 0.022631619 |
| 835.319986 | 1009.366021 | 2.278E-05   | 0.019028577 |
| 835.359986 | 839.067733  | 1.89366E-05 | 0.01581887  |
| 835.399986 | 693.175164  | 1.5644E-05  | 0.013068996 |
| 835.439986 | 539.237795  | 1.21698E-05 | 0.010167176 |
| 835.479986 | 416.292309  | 9.39514E-06 | 0.007849449 |
| 835.519986 | 347.247838  | 7.8369E-06  | 0.006547887 |
| 835.559986 | 328.345177  | 7.41029E-06 | 0.006191745 |
| 835.599986 | 345.240996  | 7.79161E-06 | 0.006510668 |
| 835.639986 | 367.978553  | 8.30476E-06 | 0.006939792 |
| 835.679986 | 373.615518  | 8.43198E-06 | 0.007046438 |
| 835.719986 | 356.709962  | 8.05045E-06 | 0.006727919 |
| 835.759986 | 343.455612  | 7.75131E-06 | 0.006478239 |
| 835.799986 | 325.223506  | 7.33984E-06 | 0.006134639 |
| 835.839986 | 303.529783  | 6.85024E-06 | 0.005725708 |
| 835.879986 | 307.195542  | 6.93298E-06 | 0.005795135 |
| 835.919986 | 349.261729  | 7.88235E-06 | 0.006589015 |
| 835.959986 | 377.238915  | 8.51376E-06 | 0.00711716  |
| 835.999986 | 415.260228  | 9.37184E-06 | 0.007834862 |
| 836.039986 | 510.927423  | 1.15309E-05 | 0.00964031  |
| 836.079986 | 669.461232  | 1.51088E-05 | 0.012632172 |
| 836.119986 | 887.491187  | 2.00294E-05 | 0.016747015 |
| 836.159986 | 977.13165   | 2.20525E-05 | 0.018439418 |
| 836.199986 | 954.177969  | 2.15345E-05 | 0.018007122 |
| 836.239986 | 947.848827  | 2.13916E-05 | 0.01788535  |
| 836.279986 | 896.371889  | 2.02299E-05 | 0.016917831 |
| 836.319986 | 795.202017  | 1.79466E-05 | 0.015009102 |

|            |             |             |             |
|------------|-------------|-------------|-------------|
| 836.359986 | 667.839364  | 1.50722E-05 | 0.012605789 |
| 836.399986 | 547.065024  | 1.23465E-05 | 0.010326609 |
| 836.439986 | 439.870027  | 9.92725E-06 | 0.008303552 |
| 836.479986 | 365.941447  | 8.25879E-06 | 0.006908311 |
| 836.519986 | 321.289157  | 7.25105E-06 | 0.006065647 |
| 836.559986 | 323.390098  | 7.29846E-06 | 0.006105603 |
| 836.599986 | 344.438545  | 7.7735E-06  | 0.006503308 |
| 836.639986 | 369.209039  | 8.33253E-06 | 0.006971331 |
| 836.679986 | 383.274377  | 8.64997E-06 | 0.007237256 |
| 836.719986 | 382.114993  | 8.6238E-06  | 0.007215708 |
| 836.759986 | 371.234086  | 8.37824E-06 | 0.007010573 |
| 836.799986 | 368.089808  | 8.30727E-06 | 0.006951527 |
| 836.839986 | 369.543916  | 8.34009E-06 | 0.006979322 |
| 836.879986 | 377.26577   | 8.51436E-06 | 0.0071255   |
| 836.919986 | 394.786548  | 8.90978E-06 | 0.007456775 |
| 836.959986 | 437.282505  | 9.86886E-06 | 0.008259838 |
| 836.999986 | 510.553206  | 1.15225E-05 | 0.009644311 |
| 837.039986 | 633.288074  | 1.42924E-05 | 0.011963335 |
| 837.079986 | 774.813295  | 1.74865E-05 | 0.014637563 |
| 837.119986 | 974.315237  | 2.19889E-05 | 0.018407379 |
| 837.159986 | 1156.497847 | 2.61005E-05 | 0.021850332 |
| 837.199986 | 1249.03951  | 2.81891E-05 | 0.023599899 |
| 837.239986 | 1237.878398 | 2.79372E-05 | 0.023390134 |
| 837.279986 | 1148.001394 | 2.59088E-05 | 0.021692913 |
| 837.319986 | 979.611156  | 2.21085E-05 | 0.018511855 |
| 837.359986 | 773.684805  | 1.7461E-05  | 0.014621133 |
| 837.399986 | 594.138476  | 1.34089E-05 | 0.011228594 |
| 837.439986 | 467.153311  | 1.0543E-05  | 0.008829129 |
| 837.479986 | 390.14407   | 8.80501E-06 | 0.007374018 |
| 837.519986 | 348.179787  | 7.85793E-06 | 0.006581176 |
| 837.559986 | 315.616727  | 7.12303E-06 | 0.005965965 |
| 837.599986 | 314.102438  | 7.08885E-06 | 0.005937624 |
| 837.639986 | 319.382702  | 7.20802E-06 | 0.006037728 |
| 837.679986 | 323.757337  | 7.30675E-06 | 0.00612072  |
| 837.719986 | 343.80207   | 7.75913E-06 | 0.006499981 |
| 837.759986 | 373.886586  | 8.4381E-06  | 0.007069102 |
| 837.799986 | 351.433897  | 7.93137E-06 | 0.006644905 |
| 837.839986 | 303.109493  | 6.84076E-06 | 0.005731461 |
| 837.879986 | 291.038577  | 6.56834E-06 | 0.005503477 |
| 837.919986 | 322.559667  | 7.27972E-06 | 0.006099825 |
| 837.959986 | 346.440638  | 7.81868E-06 | 0.006551743 |
| 837.999986 | 387.242565  | 8.73953E-06 | 0.007323722 |
| 838.039986 | 490.481664  | 1.10695E-05 | 0.009276674 |
| 838.079986 | 624.626915  | 1.4097E-05  | 0.01181438  |
| 838.119986 | 771.240859  | 1.74058E-05 | 0.014588176 |
| 838.159986 | 869.279828  | 1.96184E-05 | 0.016443387 |

|            |             |             |             |
|------------|-------------|-------------|-------------|
| 838.199986 | 937.728087  | 2.11632E-05 | 0.017739008 |
| 838.239986 | 955.46005   | 2.15634E-05 | 0.018075306 |
| 838.279986 | 889.689335  | 2.0079E-05  | 0.016831865 |
| 838.319986 | 755.529221  | 1.70512E-05 | 0.014294397 |
| 838.359986 | 615.914757  | 1.39003E-05 | 0.011653487 |
| 838.399986 | 491.366009  | 1.10894E-05 | 0.009297392 |
| 838.439986 | 395.667188  | 8.92966E-06 | 0.007486982 |
| 838.479986 | 362.552669  | 8.18231E-06 | 0.006860702 |
| 838.519986 | 341.944497  | 7.71721E-06 | 0.006471036 |
| 838.559986 | 346.427414  | 7.81838E-06 | 0.006556184 |
| 838.599986 | 357.897112  | 8.07724E-06 | 0.006773573 |
| 838.639986 | 356.511153  | 8.04596E-06 | 0.006747664 |
| 838.679986 | 358.920395  | 8.10033E-06 | 0.006793587 |
| 838.719986 | 371.781746  | 8.3906E-06  | 0.007037361 |
| 838.759986 | 390.785241  | 8.81948E-06 | 0.007397426 |
| 838.799986 | 372.081338  | 8.39736E-06 | 0.007043703 |
| 838.839986 | 353.767701  | 7.98404E-06 | 0.006697336 |
| 838.879986 | 351.243792  | 7.92708E-06 | 0.006649871 |
| 838.919986 | 352.068458  | 7.94569E-06 | 0.006665802 |
| 838.959986 | 414.069034  | 9.34496E-06 | 0.007840049 |
| 838.999986 | 516.669333  | 1.16605E-05 | 0.009783165 |
| 839.039986 | 684.075287  | 1.54386E-05 | 0.012953625 |
| 839.079986 | 920.09766   | 2.07653E-05 | 0.017423767 |
| 839.119986 | 1161.052794 | 2.62033E-05 | 0.02198775  |
| 839.159986 | 1427.932619 | 3.22265E-05 | 0.027043148 |
| 839.199986 | 1613.080675 | 3.6405E-05  | 0.030551062 |
| 839.239986 | 1599.418306 | 3.60966E-05 | 0.030293746 |
| 839.279986 | 1371.14335  | 3.09448E-05 | 0.025971348 |
| 839.319986 | 1072.848156 | 2.42127E-05 | 0.020322193 |
| 839.359986 | 832.807742  | 1.87953E-05 | 0.015776032 |
| 839.399986 | 661.12664   | 1.49207E-05 | 0.012524442 |
| 839.439986 | 483.614007  | 1.09145E-05 | 0.009162063 |
| 839.479986 | 357.337915  | 8.06462E-06 | 0.006770086 |
| 839.519986 | 303.798494  | 6.85631E-06 | 0.005756008 |
| 839.559986 | 296.516847  | 6.69197E-06 | 0.005618312 |
| 839.599986 | 356.108348  | 8.03687E-06 | 0.006747755 |
| 839.639986 | 445.282221  | 1.00494E-05 | 0.008437878 |
| 839.679986 | 518.762395  | 1.17077E-05 | 0.009830759 |
| 839.719986 | 515.202642  | 1.16274E-05 | 0.009763765 |
| 839.759986 | 462.136508  | 1.04298E-05 | 0.00875851  |
| 839.799986 | 403.054279  | 9.09637E-06 | 0.007639134 |
| 839.839986 | 360.263618  | 8.13065E-06 | 0.006828443 |
| 839.879986 | 318.599953  | 7.19036E-06 | 0.006039037 |
| 839.919986 | 286.046264  | 6.45567E-06 | 0.005422243 |
| 839.959986 | 301.278374  | 6.79943E-06 | 0.005711252 |
| 839.999986 | 385.399132  | 8.69792E-06 | 0.007306254 |



|            |             |             |             |
|------------|-------------|-------------|-------------|
| 840.039986 | 487.521343  | 1.10027E-05 | 0.009242689 |
| 840.079986 | 610.235159  | 1.37722E-05 | 0.011569714 |
| 840.119986 | 797.429167  | 1.79969E-05 | 0.015119526 |
| 840.159986 | 1001.418471 | 2.26006E-05 | 0.018988137 |
| 840.199986 | 1109.876326 | 2.50484E-05 | 0.021045634 |
| 840.239986 | 1124.82188  | 2.53857E-05 | 0.021330049 |
| 840.279986 | 1015.970201 | 2.2929E-05  | 0.019266807 |
| 840.319986 | 850.556632  | 1.91959E-05 | 0.01613068  |
| 840.359986 | 685.426754  | 1.54691E-05 | 0.012999635 |
| 840.399986 | 554.64552   | 1.25176E-05 | 0.010519771 |
| 840.439986 | 450.312104  | 1.01629E-05 | 0.008541322 |
| 840.479986 | 395.514951  | 8.92622E-06 | 0.007502311 |
| 840.519986 | 358.1821    | 8.08367E-06 | 0.006794487 |
| 840.559986 | 329.326509  | 7.43244E-06 | 0.006247412 |
| 840.599986 | 324.139765  | 7.31538E-06 | 0.006149311 |
| 840.639986 | 324.365669  | 7.32048E-06 | 0.006153889 |
| 840.679986 | 353.994272  | 7.98916E-06 | 0.006716325 |
| 840.719986 | 377.062517  | 8.50978E-06 | 0.007154339 |
| 840.759986 | 382.461803  | 8.63163E-06 | 0.007257129 |
| 840.799986 | 374.033081  | 8.44141E-06 | 0.007097534 |
| 840.839986 | 362.634404  | 8.18415E-06 | 0.006881563 |
| 840.879986 | 346.348335  | 7.8166E-06  | 0.006572822 |
| 840.919986 | 344.141708  | 7.7668E-06  | 0.006531257 |
| 840.959986 | 400.511056  | 9.03898E-06 | 0.007601418 |
| 840.999986 | 508.589796  | 1.14782E-05 | 0.009653135 |
| 841.039986 | 623.142535  | 1.40635E-05 | 0.011827931 |
| 841.079986 | 758.423455  | 1.71166E-05 | 0.014396397 |
| 841.119986 | 960.214274  | 2.16707E-05 | 0.018227658 |
| 841.159986 | 1157.874373 | 2.61316E-05 | 0.021980866 |
| 841.199986 | 1293.010513 | 2.91814E-05 | 0.024547432 |
| 841.239986 | 1290.585289 | 2.91267E-05 | 0.024502555 |
| 841.279986 | 1164.73133  | 2.62864E-05 | 0.022114192 |
| 841.319986 | 984.170579  | 2.22114E-05 | 0.01868686  |
| 841.359986 | 802.176705  | 1.8104E-05  | 0.01523199  |
| 841.399986 | 615.870267  | 1.38993E-05 | 0.0116949   |
| 841.439986 | 485.564777  | 1.09585E-05 | 0.009220937 |
| 841.479986 | 412.041951  | 9.29921E-06 | 0.007825102 |
| 841.519986 | 351.87737   | 7.94138E-06 | 0.006682832 |
| 841.559986 | 327.529074  | 7.39187E-06 | 0.006220706 |
| 841.599986 | 344.651137  | 7.7783E-06  | 0.006546214 |
| 841.639986 | 364.786826  | 8.23273E-06 | 0.006928995 |
| 841.679986 | 357.177796  | 8.06101E-06 | 0.006784787 |
| 841.719986 | 348.132634  | 7.85687E-06 | 0.006613283 |
| 841.759986 | 329.805501  | 7.44325E-06 | 0.006265431 |
| 841.799986 | 317.259507  | 7.16011E-06 | 0.006027376 |
| 841.839986 | 329.131461  | 7.42804E-06 | 0.00625322  |

|            |             |             |             |
|------------|-------------|-------------|-------------|
| 841.879986 | 321.884809  | 7.26449E-06 | 0.00611583  |
| 841.919986 | 276.405266  | 6.23808E-06 | 0.005251966 |
| 841.959986 | 272.543645  | 6.15093E-06 | 0.005178837 |
| 841.999986 | 365.719865  | 8.25379E-06 | 0.006949689 |
| 842.039986 | 505.917064  | 1.14178E-05 | 0.009614281 |
| 842.079986 | 648.770341  | 1.46418E-05 | 0.012329603 |
| 842.119986 | 814.737389  | 1.83875E-05 | 0.015484471 |
| 842.159986 | 937.117928  | 2.11494E-05 | 0.017811217 |
| 842.199986 | 995.756451  | 2.24728E-05 | 0.018926622 |
| 842.239986 | 997.783217  | 2.25186E-05 | 0.018966046 |
| 842.279986 | 910.555601  | 2.055E-05   | 0.01730883  |
| 842.319986 | 799.275303  | 1.80385E-05 | 0.015194215 |
| 842.359986 | 674.537219  | 1.52234E-05 | 0.012823554 |
| 842.399986 | 549.829588  | 1.24089E-05 | 0.010453247 |
| 842.439986 | 457.687103  | 1.03294E-05 | 0.008701866 |
| 842.479986 | 378.743119  | 8.5477E-06  | 0.00720127  |
| 842.519986 | 357.536988  | 8.06911E-06 | 0.006798388 |
| 842.559986 | 356.533775  | 8.04647E-06 | 0.006779634 |
| 842.599986 | 362.922161  | 8.19065E-06 | 0.00690144  |
| 842.639986 | 362.916415  | 8.19052E-06 | 0.006901658 |
| 842.679986 | 345.753934  | 7.80318E-06 | 0.006575588 |
| 842.719986 | 344.604891  | 7.77725E-06 | 0.006554046 |
| 842.759986 | 350.739917  | 7.91571E-06 | 0.006671045 |
| 842.799986 | 348.060244  | 7.85523E-06 | 0.006620392 |
| 842.839986 | 350.344994  | 7.9068E-06  | 0.006664166 |
| 842.879986 | 354.724584  | 8.00564E-06 | 0.006747794 |
| 842.919986 | 382.553804  | 8.63371E-06 | 0.007277524 |
| 842.959986 | 463.114482  | 1.04518E-05 | 0.00881049  |
| 842.999986 | 566.7665    | 1.27911E-05 | 0.010782923 |
| 843.039986 | 663.19639   | 1.49674E-05 | 0.012618133 |
| 843.079986 | 797.536572  | 1.79993E-05 | 0.015174841 |
| 843.119986 | 1001.155939 | 2.25947E-05 | 0.019050039 |
| 843.159986 | 1175.329396 | 2.65255E-05 | 0.02236528  |
| 843.199986 | 1226.477925 | 2.76799E-05 | 0.02333969  |
| 843.239986 | 1205.675711 | 2.72104E-05 | 0.022944915 |
| 843.279986 | 1107.747843 | 2.50003E-05 | 0.021082274 |
| 843.319986 | 928.328497  | 2.09511E-05 | 0.017668465 |
| 843.359986 | 774.802525  | 1.74862E-05 | 0.014747173 |
| 843.399986 | 652.076909  | 1.47165E-05 | 0.012411869 |
| 843.439986 | 521.06856   | 1.17598E-05 | 0.009918678 |
| 843.479986 | 414.480672  | 9.35425E-06 | 0.007890124 |
| 843.519986 | 330.567117  | 7.46044E-06 | 0.00629303  |
| 843.559986 | 285.878932  | 6.45189E-06 | 0.005442556 |
| 843.599986 | 299.791276  | 6.76587E-06 | 0.005707689 |
| 843.639986 | 346.123441  | 7.81152E-06 | 0.006590114 |
| 843.679986 | 372.903923  | 8.41592E-06 | 0.007100345 |

|            |             |             |             |
|------------|-------------|-------------|-------------|
| 843.719986 | 359.326387  | 8.1095E-06  | 0.006842144 |
| 843.759986 | 358.763023  | 8.09678E-06 | 0.00683174  |
| 843.799986 | 350.747797  | 7.91589E-06 | 0.006679427 |
| 843.839986 | 329.281131  | 7.43142E-06 | 0.006270926 |
| 843.879986 | 309.262555  | 6.97963E-06 | 0.005889966 |
| 843.919986 | 303.091917  | 6.84036E-06 | 0.005772719 |
| 843.959986 | 338.014825  | 7.62852E-06 | 0.006438169 |
| 843.999986 | 424.203669  | 9.57369E-06 | 0.008080191 |
| 844.039986 | 507.834281  | 1.14611E-05 | 0.009673637 |
| 844.079986 | 642.247643  | 1.44946E-05 | 0.012234631 |
| 844.119986 | 848.481419  | 1.9149E-05  | 0.016164091 |
| 844.159986 | 1003.406262 | 2.26455E-05 | 0.01911641  |
| 844.199986 | 1061.142796 | 2.39485E-05 | 0.020217336 |
| 844.239986 | 1054.213696 | 2.37921E-05 | 0.020086271 |
| 844.279986 | 945.492317  | 2.13384E-05 | 0.018015622 |
| 844.319986 | 778.380316  | 1.7567E-05  | 0.014832135 |
| 844.359986 | 643.505461  | 1.4523E-05  | 0.012262659 |
| 844.399986 | 519.137229  | 1.17162E-05 | 0.009893163 |
| 844.439986 | 441.054829  | 9.95399E-06 | 0.00840555  |
| 844.479986 | 390.507672  | 8.81321E-06 | 0.007442583 |
| 844.519986 | 361.838841  | 8.1662E-06  | 0.006896518 |
| 844.559986 | 352.375244  | 7.95262E-06 | 0.006716463 |
| 844.599986 | 383.710257  | 8.65981E-06 | 0.007314072 |
| 844.639986 | 409.907204  | 9.25103E-06 | 0.007813794 |
| 844.679986 | 418.782286  | 9.45133E-06 | 0.007983352 |
| 844.719986 | 437.040658  | 9.8634E-06  | 0.00833181  |
| 844.759986 | 438.665903  | 9.90008E-06 | 0.00836319  |
| 844.799986 | 398.87117   | 9.00197E-06 | 0.007604861 |
| 844.839986 | 352.488802  | 7.95518E-06 | 0.006720855 |
| 844.879986 | 351.428178  | 7.93124E-06 | 0.00670095  |
| 844.919986 | 395.67976   | 8.92994E-06 | 0.007545086 |
| 844.959986 | 440.492741  | 9.94131E-06 | 0.008400007 |
| 844.999986 | 565.303618  | 1.27581E-05 | 0.010780607 |
| 845.039986 | 729.802692  | 1.64706E-05 | 0.013918341 |
| 845.079986 | 873.351095  | 1.97103E-05 | 0.016656795 |
| 845.119986 | 1051.682096 | 2.3735E-05  | 0.020058923 |
| 845.159986 | 1259.741525 | 2.84306E-05 | 0.024028415 |
| 845.199986 | 1359.757909 | 3.06878E-05 | 0.025937364 |
| 845.239986 | 1278.228045 | 2.88478E-05 | 0.024383337 |
| 845.279986 | 1114.478812 | 2.51522E-05 | 0.02126068  |
| 845.319986 | 948.351949  | 2.1403E-05  | 0.018092369 |
| 845.359986 | 773.364555  | 1.74538E-05 | 0.014754711 |
| 845.399986 | 628.044859  | 1.41741E-05 | 0.011982782 |
| 845.439986 | 537.665765  | 1.21344E-05 | 0.010258879 |
| 845.479986 | 465.200895  | 1.04989E-05 | 0.00887664  |
| 845.519986 | 407.46389   | 9.19589E-06 | 0.007775311 |

|            |             |             |             |
|------------|-------------|-------------|-------------|
| 845.559986 | 360.910102  | 8.14524E-06 | 0.006887288 |
| 845.599986 | 326.00229   | 7.35742E-06 | 0.006221432 |
| 845.639986 | 329.849275  | 7.44424E-06 | 0.006295146 |
| 845.679986 | 357.305301  | 8.06388E-06 | 0.006819464 |
| 845.719986 | 360.519969  | 8.13643E-06 | 0.006881144 |
| 845.759986 | 353.312756  | 7.97378E-06 | 0.006743901 |
| 845.799986 | 334.519794  | 7.54965E-06 | 0.00638549  |
| 845.839986 | 324.869671  | 7.33186E-06 | 0.006201577 |
| 845.879986 | 320.743365  | 7.23873E-06 | 0.006123098 |
| 845.919986 | 321.317017  | 7.25168E-06 | 0.006134339 |
| 845.959986 | 338.056788  | 7.62947E-06 | 0.006454227 |
| 845.999986 | 398.720071  | 8.99856E-06 | 0.007612779 |
| 846.039986 | 497.66197   | 1.12315E-05 | 0.00950233  |
| 846.079986 | 694.552555  | 1.56751E-05 | 0.013262375 |
| 846.119986 | 892.093596  | 2.01333E-05 | 0.017035196 |
| 846.159986 | 999.529669  | 2.2558E-05  | 0.019087671 |
| 846.199986 | 1074.322705 | 2.4246E-05  | 0.020516937 |
| 846.239986 | 1138.669194 | 2.56982E-05 | 0.021746826 |
| 846.279986 | 1102.880387 | 2.48905E-05 | 0.02106431  |
| 846.319986 | 951.681432  | 2.14781E-05 | 0.018177366 |
| 846.359986 | 773.750617  | 1.74625E-05 | 0.014779539 |
| 846.399986 | 623.519039  | 1.4072E-05  | 0.011910504 |
| 846.439986 | 503.448551  | 1.13621E-05 | 0.009617363 |
| 846.479986 | 411.642814  | 9.2902E-06  | 0.007863973 |
| 846.519986 | 346.941067  | 7.82998E-06 | 0.006628232 |
| 846.559986 | 303.822141  | 6.85684E-06 | 0.005804729 |
| 846.599986 | 317.625409  | 7.16836E-06 | 0.006068736 |
| 846.639986 | 368.722966  | 8.32156E-06 | 0.007045369 |
| 846.679986 | 410.526043  | 9.265E-06   | 0.007844491 |
| 846.719986 | 441.503635  | 9.96412E-06 | 0.008436821 |
| 846.759986 | 446.676979  | 1.00809E-05 | 0.008536083 |
| 846.799986 | 421.012782  | 9.50167E-06 | 0.008046016 |
| 846.839986 | 389.152894  | 8.78264E-06 | 0.00743749  |
| 846.879986 | 395.930756  | 8.93561E-06 | 0.007567386 |
| 846.919986 | 449.18322   | 1.01374E-05 | 0.0085856   |
| 846.959986 | 518.403333  | 1.16996E-05 | 0.009909128 |
| 846.999986 | 631.042831  | 1.42418E-05 | 0.012062769 |
| 847.039986 | 762.835469  | 1.72161E-05 | 0.014582754 |
| 847.079986 | 927.974198  | 2.09431E-05 | 0.017740468 |
| 847.119986 | 1182.413309 | 2.66854E-05 | 0.022605754 |
| 847.159986 | 1410.177933 | 3.18258E-05 | 0.026961503 |
| 847.199986 | 1507.082951 | 3.40128E-05 | 0.028815612 |
| 847.239986 | 1422.922384 | 3.21134E-05 | 0.027207736 |
| 847.279986 | 1239.685449 | 2.7978E-05  | 0.023705177 |
| 847.319986 | 1078.292718 | 2.43356E-05 | 0.02062001  |
| 847.359986 | 909.910922  | 2.05354E-05 | 0.017400895 |

|            |             |             |             |
|------------|-------------|-------------|-------------|
| 847.399986 | 717.361949  | 1.61899E-05 | 0.013719287 |
| 847.439986 | 557.606609  | 1.25844E-05 | 0.010664528 |
| 847.479986 | 439.752054  | 9.92459E-06 | 0.008410893 |
| 847.519986 | 373.954003  | 8.43962E-06 | 0.007152747 |
| 847.559986 | 334.047929  | 7.539E-06   | 0.006389752 |
| 847.599986 | 314.136882  | 7.08963E-06 | 0.006009172 |
| 847.639986 | 328.755765  | 7.41956E-06 | 0.006289115 |
| 847.679986 | 355.716822  | 8.02803E-06 | 0.006805203 |
| 847.719986 | 361.853673  | 8.16653E-06 | 0.006922934 |
| 847.759986 | 355.300492  | 8.01864E-06 | 0.00679788  |
| 847.799986 | 327.200642  | 7.38446E-06 | 0.006260547 |
| 847.839986 | 319.533802  | 7.21143E-06 | 0.006114141 |
| 847.879986 | 310.482014  | 7.00715E-06 | 0.005941219 |
| 847.919986 | 311.759324  | 7.03597E-06 | 0.005965943 |
| 847.959986 | 321.43809   | 7.25441E-06 | 0.006151449 |
| 847.999986 | 397.917485  | 8.98044E-06 | 0.007615416 |
| 848.039986 | 541.718374  | 1.22258E-05 | 0.010367992 |
| 848.079986 | 726.953628  | 1.64063E-05 | 0.013913881 |
| 848.119986 | 947.923218  | 2.13933E-05 | 0.018144091 |
| 848.159986 | 1120.73064  | 2.52933E-05 | 0.02145279  |
| 848.199986 | 1215.246655 | 2.74264E-05 | 0.023263093 |
| 848.239986 | 1178.330469 | 2.65933E-05 | 0.022557481 |
| 848.279986 | 1018.664087 | 2.29898E-05 | 0.019501812 |
| 848.319986 | 836.371514  | 1.88757E-05 | 0.016012668 |
| 848.359986 | 663.651037  | 1.49777E-05 | 0.012706464 |
| 848.399986 | 500.672048  | 1.12995E-05 | 0.009586471 |
| 848.439986 | 422.428083  | 9.53361E-06 | 0.008088699 |
| 848.479986 | 377.808435  | 8.52661E-06 | 0.007234658 |
| 848.519986 | 341.404686  | 7.70503E-06 | 0.00653787  |
| 848.559986 | 321.452045  | 7.25472E-06 | 0.006156069 |
| 848.599986 | 358.178997  | 8.0836E-06  | 0.006859744 |
| 848.639986 | 411.228868  | 9.28086E-06 | 0.007876111 |
| 848.679986 | 441.233689  | 9.95803E-06 | 0.008451181 |
| 848.719985 | 464.051222  | 1.0473E-05  | 0.008888636 |
| 848.759985 | 464.205496  | 1.04765E-05 | 0.00889201  |
| 848.799985 | 434.366385  | 9.80304E-06 | 0.008320824 |
| 848.839985 | 407.960921  | 9.20711E-06 | 0.007815363 |
| 848.879985 | 382.433798  | 8.631E-06   | 0.007326682 |
| 848.919985 | 404.357403  | 9.12578E-06 | 0.00774706  |
| 848.959985 | 453.580915  | 1.02367E-05 | 0.00869054  |
| 848.999985 | 550.439481  | 1.24227E-05 | 0.010546832 |
| 849.039985 | 710.522647  | 1.60355E-05 | 0.013614786 |
| 849.079985 | 893.81589   | 2.01722E-05 | 0.017127794 |
| 849.119985 | 1097.830893 | 2.47765E-05 | 0.021038233 |
| 849.159985 | 1343.411391 | 3.03189E-05 | 0.025745617 |
| 849.199985 | 1497.819111 | 3.38037E-05 | 0.028706094 |

|            |             |             |             |
|------------|-------------|-------------|-------------|
| 849.239985 | 1461.895897 | 3.2993E-05  | 0.028018936 |
| 849.279985 | 1286.150846 | 2.90266E-05 | 0.024651739 |
| 849.319985 | 1107.401763 | 2.49925E-05 | 0.021226643 |
| 849.359985 | 910.097739  | 2.05396E-05 | 0.017445547 |
| 849.399985 | 705.082702  | 1.59127E-05 | 0.013516276 |
| 849.439985 | 576.664914  | 1.30145E-05 | 0.011055057 |
| 849.479985 | 521.818954  | 1.17767E-05 | 0.010004094 |
| 849.519985 | 442.860211  | 9.99474E-06 | 0.00849073  |
| 849.559985 | 391.785827  | 8.84206E-06 | 0.007511861 |
| 849.599985 | 380.943028  | 8.59735E-06 | 0.007304311 |
| 849.639985 | 397.567322  | 8.97254E-06 | 0.007623429 |
| 849.679985 | 415.116551  | 9.3686E-06  | 0.007960314 |
| 849.719985 | 418.896235  | 9.4539E-06  | 0.008033172 |
| 849.759985 | 397.41658   | 8.96914E-06 | 0.007621615 |
| 849.799985 | 368.32825   | 8.31266E-06 | 0.007064095 |
| 849.839985 | 331.087477  | 7.47218E-06 | 0.00635016  |
| 849.879985 | 307.305455  | 6.93546E-06 | 0.005894305 |
| 849.919985 | 325.980659  | 7.35693E-06 | 0.006252801 |
| 849.959985 | 374.22123   | 8.44565E-06 | 0.007178466 |
| 849.999985 | 423.307222  | 9.55345E-06 | 0.008120436 |
| 850.039985 | 527.594634  | 1.19071E-05 | 0.010121491 |
| 850.079985 | 664.277495  | 1.49918E-05 | 0.012744244 |
| 850.119985 | 774.113367  | 1.74707E-05 | 0.014852158 |
| 850.159985 | 874.579405  | 1.9738E-05  | 0.016780491 |
| 850.199985 | 958.425145  | 2.16303E-05 | 0.018390098 |
| 850.239985 | 953.691677  | 2.15235E-05 | 0.018300134 |
| 850.279985 | 907.362277  | 2.04779E-05 | 0.017411951 |
| 850.319985 | 812.327214  | 1.83331E-05 | 0.015588996 |
| 850.359985 | 679.435094  | 1.53339E-05 | 0.013039338 |
| 850.399985 | 564.221653  | 1.27337E-05 | 0.010828736 |
| 850.439985 | 488.714687  | 1.10296E-05 | 0.009380021 |
| 850.479985 | 434.809963  | 9.81306E-06 | 0.008345807 |
| 850.519985 | 386.288518  | 8.71799E-06 | 0.007414828 |
| 850.559985 | 362.395297  | 8.17876E-06 | 0.006956523 |
| 850.599985 | 384.309235  | 8.67332E-06 | 0.007377529 |
| 850.639985 | 418.534138  | 9.44573E-06 | 0.008034918 |
| 850.679985 | 427.29527   | 9.64346E-06 | 0.008203498 |
| 850.719985 | 430.608557  | 9.71824E-06 | 0.008267497 |
| 850.759985 | 424.399596  | 9.57811E-06 | 0.008148671 |
| 850.799985 | 386.48942   | 8.72253E-06 | 0.007421127 |
| 850.839985 | 363.209942  | 8.19714E-06 | 0.006974457 |
| 850.879985 | 361.339131  | 8.15492E-06 | 0.006938859 |
| 850.919985 | 375.153429  | 8.46669E-06 | 0.007204476 |
| 850.959985 | 448.069011  | 1.01123E-05 | 0.008605157 |
| 850.999985 | 547.786141  | 1.23628E-05 | 0.010520717 |
| 851.039985 | 723.84579   | 1.63362E-05 | 0.013902752 |

|            |             |             |             |
|------------|-------------|-------------|-------------|
| 851.079985 | 977.060268  | 2.20509E-05 | 0.018767071 |
| 851.119985 | 1234.967465 | 2.78715E-05 | 0.023721987 |
| 851.159985 | 1446.326989 | 3.26416E-05 | 0.027783211 |
| 851.199985 | 1544.702474 | 3.48618E-05 | 0.029674349 |
| 851.239985 | 1533.151289 | 3.46011E-05 | 0.029453831 |
| 851.279985 | 1395.083869 | 3.14851E-05 | 0.026802635 |
| 851.319985 | 1208.810347 | 2.72812E-05 | 0.023225002 |
| 851.359985 | 988.251003  | 2.23034E-05 | 0.018988264 |
| 851.399985 | 772.390956  | 1.74318E-05 | 0.014841424 |
| 851.439985 | 577.818606  | 1.30406E-05 | 0.011103255 |
| 851.479985 | 419.686667  | 9.47174E-06 | 0.008065    |
| 851.519985 | 353.180041  | 7.97078E-06 | 0.00678728  |
| 851.559985 | 355.230744  | 8.01706E-06 | 0.00682701  |
| 851.599985 | 365.078772  | 8.23932E-06 | 0.007016604 |
| 851.639985 | 345.25978   | 7.79203E-06 | 0.006636006 |
| 851.679985 | 332.803418  | 7.51091E-06 | 0.006396891 |
| 851.719985 | 340.414723  | 7.68269E-06 | 0.006543497 |
| 851.759985 | 324.996981  | 7.33473E-06 | 0.006247429 |
| 851.799985 | 313.714445  | 7.0801E-06  | 0.006030827 |
| 851.839985 | 291.974923  | 6.58947E-06 | 0.005613172 |
| 851.879985 | 277.788097  | 6.26929E-06 | 0.005340683 |
| 851.919985 | 268.719102  | 6.06462E-06 | 0.005166567 |
| 851.959985 | 278.042464  | 6.27503E-06 | 0.005346075 |
| 851.999985 | 354.429203  | 7.99897E-06 | 0.006815125 |
| 852.039985 | 491.643136  | 1.10957E-05 | 0.009453981 |
| 852.079985 | 686.976698  | 1.55041E-05 | 0.013210739 |
| 852.119985 | 927.780097  | 2.09387E-05 | 0.017842289 |
| 852.159985 | 1200.323084 | 2.70896E-05 | 0.02308469  |
| 852.199985 | 1347.456529 | 3.04102E-05 | 0.025915586 |
| 852.239985 | 1299.895869 | 2.93368E-05 | 0.025002027 |
| 852.279985 | 1148.192875 | 2.59131E-05 | 0.022085228 |
| 852.319985 | 942.08863   | 2.12616E-05 | 0.018121711 |
| 852.359985 | 756.669366  | 1.7077E-05  | 0.014555729 |
| 852.399985 | 645.549924  | 1.45692E-05 | 0.012418754 |
| 852.439985 | 570.148659  | 1.28675E-05 | 0.010968738 |
| 852.479985 | 521.898969  | 1.17785E-05 | 0.010040963 |
| 852.519985 | 464.45701   | 1.04821E-05 | 0.00893624  |
| 852.559985 | 436.910445  | 9.86046E-06 | 0.008406634 |
| 852.599985 | 438.508007  | 9.89651E-06 | 0.008437768 |
| 852.639985 | 454.062394  | 1.02476E-05 | 0.008737476 |
| 852.679985 | 437.552731  | 9.87496E-06 | 0.008420177 |
| 852.719985 | 417.273466  | 9.41728E-06 | 0.008030304 |
| 852.759985 | 416.312883  | 9.3956E-06  | 0.008012193 |
| 852.799985 | 374.077537  | 8.44241E-06 | 0.007199686 |
| 852.839985 | 343.824098  | 7.75963E-06 | 0.006617724 |
| 852.879985 | 330.239497  | 7.45305E-06 | 0.006356553 |

|            |             |             |             |
|------------|-------------|-------------|-------------|
| 852.919985 | 339.71256   | 7.66684E-06 | 0.0065392   |
| 852.959985 | 399.302853  | 9.01171E-06 | 0.007686627 |
| 852.999985 | 511.677503  | 1.15478E-05 | 0.009850315 |
| 853.039985 | 642.804032  | 1.45072E-05 | 0.012375215 |
| 853.079985 | 814.700523  | 1.83867E-05 | 0.015685288 |
| 853.119985 | 1017.41959  | 2.29617E-05 | 0.019589122 |
| 853.159985 | 1249.241792 | 2.81936E-05 | 0.024053692 |
| 853.199985 | 1432.225761 | 3.23233E-05 | 0.027578274 |
| 853.239985 | 1416.04196  | 3.19581E-05 | 0.027267924 |
| 853.279985 | 1249.891359 | 2.82083E-05 | 0.024069584 |
| 853.319985 | 1097.347596 | 2.47656E-05 | 0.021132987 |
| 853.359985 | 939.585     | 2.12051E-05 | 0.018095605 |
| 853.399985 | 744.932208  | 1.68121E-05 | 0.014347431 |
| 853.439985 | 582.006039  | 1.31351E-05 | 0.01120999  |
| 853.479985 | 482.549654  | 1.08905E-05 | 0.009294801 |
| 853.519985 | 428.348287  | 9.66722E-06 | 0.008251169 |
| 853.559985 | 406.372302  | 9.17126E-06 | 0.007828218 |
| 853.599985 | 397.290155  | 8.96629E-06 | 0.007653621 |
| 853.639985 | 380.87555   | 8.59583E-06 | 0.007337745 |
| 853.679985 | 353.854228  | 7.986E-06   | 0.006817486 |
| 853.719985 | 328.114131  | 7.40508E-06 | 0.006321864 |
| 853.759985 | 310.509362  | 7.00776E-06 | 0.005982948 |
| 853.799985 | 279.298081  | 6.30337E-06 | 0.005381816 |
| 853.839985 | 273.200072  | 6.16575E-06 | 0.00526456  |
| 853.879985 | 282.633093  | 6.37864E-06 | 0.005446589 |
| 853.919985 | 288.427812  | 6.50941E-06 | 0.005558519 |
| 853.959985 | 323.762092  | 7.30686E-06 | 0.006239766 |
| 853.999985 | 412.088181  | 9.30026E-06 | 0.007942419 |
| 854.039985 | 528.725357  | 1.19326E-05 | 0.010190913 |
| 854.079985 | 628.45886   | 1.41834E-05 | 0.012113793 |
| 854.119985 | 702.412604  | 1.58525E-05 | 0.013539915 |
| 854.159985 | 797.356771  | 1.79952E-05 | 0.015370807 |
| 854.199985 | 899.625761  | 2.03033E-05 | 0.017343079 |
| 854.239985 | 979.358095  | 2.21027E-05 | 0.018881051 |
| 854.279985 | 909.45649   | 2.05252E-05 | 0.017534239 |
| 854.319985 | 783.600504  | 1.76848E-05 | 0.015108454 |
| 854.359985 | 689.735201  | 1.55664E-05 | 0.013299277 |
| 854.399985 | 582.601353  | 1.31485E-05 | 0.011234079 |
| 854.439985 | 479.840948  | 1.08293E-05 | 0.009253023 |
| 854.479985 | 421.242644  | 9.50686E-06 | 0.008123421 |
| 854.519985 | 371.681074  | 8.38832E-06 | 0.007167991 |
| 854.559985 | 351.223796  | 7.92663E-06 | 0.006773782 |
| 854.599985 | 351.97953   | 7.94369E-06 | 0.006788675 |
| 854.639985 | 353.443257  | 7.97672E-06 | 0.006817226 |
| 854.679985 | 365.386479  | 8.24626E-06 | 0.007047917 |
| 854.719985 | 400.598469  | 9.04095E-06 | 0.00772748  |



|            |             |             |             |
|------------|-------------|-------------|-------------|
| 854.759985 | 404.368751  | 9.12604E-06 | 0.007800573 |
| 854.799985 | 367.80034   | 8.30074E-06 | 0.007095474 |
| 854.839985 | 320.090201  | 7.22399E-06 | 0.006175355 |
| 854.879985 | 317.425235  | 7.16385E-06 | 0.006124228 |
| 854.919985 | 356.569306  | 8.04727E-06 | 0.006879774 |
| 854.959985 | 394.866906  | 8.9116E-06  | 0.007619058 |
| 854.999985 | 462.384834  | 1.04354E-05 | 0.008922251 |
| 855.039985 | 583.725706  | 1.31739E-05 | 0.011264191 |
| 855.079985 | 763.892624  | 1.724E-05   | 0.014741573 |
| 855.119985 | 977.210254  | 2.20543E-05 | 0.018859051 |
| 855.159985 | 1107.076781 | 2.49852E-05 | 0.021366327 |
| 855.199985 | 1194.44313  | 2.69569E-05 | 0.023053556 |
| 855.239985 | 1170.091296 | 2.64073E-05 | 0.022584605 |
| 855.279985 | 1054.189213 | 2.37916E-05 | 0.020348464 |
| 855.319985 | 935.158894  | 2.11052E-05 | 0.018051728 |
| 855.359985 | 806.296364  | 1.8197E-05  | 0.015564974 |
| 855.399985 | 668.693523  | 1.50915E-05 | 0.012909253 |
| 855.439985 | 547.113428  | 1.23476E-05 | 0.01056262  |
| 855.479985 | 432.902064  | 9.77E-06    | 0.008358037 |
| 855.519985 | 348.662071  | 7.86882E-06 | 0.00673193  |
| 855.559985 | 315.399779  | 7.11813E-06 | 0.00608999  |
| 855.599985 | 321.834013  | 7.26335E-06 | 0.006214518 |
| 855.639985 | 360.599458  | 8.13823E-06 | 0.006963393 |
| 855.679985 | 377.185729  | 8.51256E-06 | 0.007284024 |
| 855.719985 | 378.277118  | 8.53719E-06 | 0.007305442 |
| 855.759985 | 375.15686   | 8.46677E-06 | 0.007245521 |
| 855.799985 | 350.678746  | 7.91433E-06 | 0.006773084 |
| 855.839985 | 313.102352  | 7.06628E-06 | 0.006047608 |
| 855.879985 | 297.38662   | 6.7116E-06  | 0.005744326 |
| 855.919985 | 296.144104  | 6.68356E-06 | 0.005720593 |
| 855.959985 | 335.579175  | 7.57355E-06 | 0.00648266  |
| 855.999985 | 394.022988  | 8.89255E-06 | 0.007612023 |
| 856.039985 | 468.476607  | 1.05729E-05 | 0.009050795 |
| 856.079985 | 578.615428  | 1.30585E-05 | 0.011179158 |
| 856.119985 | 750.4621    | 1.69369E-05 | 0.014500005 |
| 856.159985 | 888.549088  | 2.00533E-05 | 0.017168846 |
| 856.199985 | 958.534463  | 2.16328E-05 | 0.018521993 |
| 856.239985 | 946.275667  | 2.13561E-05 | 0.018285967 |
| 856.279985 | 861.696582  | 1.94473E-05 | 0.016652327 |
| 856.319985 | 747.560924  | 1.68714E-05 | 0.014447325 |
| 856.359985 | 652.495155  | 1.47259E-05 | 0.012610677 |
| 856.399985 | 561.16268   | 1.26647E-05 | 0.010846015 |
| 856.439985 | 488.743712  | 1.10303E-05 | 0.00944676  |
| 856.479985 | 452.17919   | 1.02051E-05 | 0.008740425 |
| 856.519985 | 450.16605   | 1.01596E-05 | 0.008701918 |
| 856.559985 | 439.107048  | 9.91003E-06 | 0.008488539 |

|            |             |             |             |
|------------|-------------|-------------|-------------|
| 856.599985 | 410.81868   | 9.27161E-06 | 0.007942057 |
| 856.639985 | 408.652844  | 9.22273E-06 | 0.007900555 |
| 856.679985 | 397.230728  | 8.96494E-06 | 0.007680088 |
| 856.719985 | 377.65817   | 8.52322E-06 | 0.007302012 |
| 856.759985 | 381.445274  | 8.60869E-06 | 0.00737558  |
| 856.799985 | 396.761724  | 8.95436E-06 | 0.007672095 |
| 856.839985 | 390.609194  | 8.81551E-06 | 0.007553478 |
| 856.879985 | 360.040418  | 8.12561E-06 | 0.006962673 |
| 856.919985 | 370.190105  | 8.35468E-06 | 0.007159288 |
| 856.959985 | 430.583428  | 9.71767E-06 | 0.008327653 |
| 856.999985 | 493.767075  | 1.11436E-05 | 0.009550095 |
| 857.039985 | 579.141784  | 1.30704E-05 | 0.011201875 |
| 857.079985 | 715.74836   | 1.61534E-05 | 0.013844793 |
| 857.119985 | 911.513935  | 2.05716E-05 | 0.017632329 |
| 857.159985 | 1079.012616 | 2.43518E-05 | 0.020873399 |
| 857.199985 | 1137.56006  | 2.56731E-05 | 0.02200702  |
| 857.239985 | 1125.118954 | 2.53924E-05 | 0.021767353 |
| 857.279985 | 1031.950449 | 2.32897E-05 | 0.01996578  |
| 857.319985 | 880.23233   | 1.98656E-05 | 0.017031191 |
| 857.359985 | 742.502198  | 1.67572E-05 | 0.014366987 |
| 857.399985 | 616.710055  | 1.39183E-05 | 0.011933539 |
| 857.439985 | 511.773939  | 1.155E-05   | 0.009903453 |
| 857.479985 | 430.05752   | 9.7058E-06  | 0.008322529 |
| 857.519985 | 379.58536   | 8.56671E-06 | 0.007346127 |
| 857.559985 | 346.031098  | 7.80944E-06 | 0.006697063 |
| 857.599985 | 318.110691  | 7.17932E-06 | 0.006156981 |
| 857.639985 | 346.243835  | 7.81424E-06 | 0.006701806 |
| 857.679985 | 376.848436  | 8.50494E-06 | 0.00729452  |
| 857.719985 | 374.017776  | 8.44106E-06 | 0.007240066 |
| 857.759985 | 343.891025  | 7.76114E-06 | 0.006657197 |
| 857.799985 | 314.596363  | 7.1E-06     | 0.006090381 |
| 857.839985 | 333.58305   | 7.5285E-06  | 0.006458252 |
| 857.879985 | 332.853565  | 7.51204E-06 | 0.00644443  |
| 857.919985 | 328.977346  | 7.42456E-06 | 0.006369679 |
| 857.959985 | 350.782402  | 7.91667E-06 | 0.006792186 |
| 857.999985 | 390.485147  | 8.81271E-06 | 0.007561302 |
| 858.039985 | 484.909991  | 1.09437E-05 | 0.009390169 |
| 858.079985 | 608.39077   | 1.37305E-05 | 0.011781895 |
| 858.119985 | 734.318843  | 1.65726E-05 | 0.014221239 |
| 858.159985 | 849.155746  | 1.91643E-05 | 0.016446003 |
| 858.199985 | 922.96917   | 2.08301E-05 | 0.017876416 |
| 858.239985 | 910.605983  | 2.05511E-05 | 0.017637783 |
| 858.279985 | 818.259949  | 1.8467E-05  | 0.015849846 |
| 858.319985 | 721.571073  | 1.62849E-05 | 0.013977616 |
| 858.359985 | 640.06329   | 1.44453E-05 | 0.012399299 |
| 858.399985 | 560.842808  | 1.26574E-05 | 0.010865147 |

|            |             |             |             |
|------------|-------------|-------------|-------------|
| 858.439985 | 460.08899   | 1.03836E-05 | 0.00891367  |
| 858.479985 | 389.607967  | 8.79291E-06 | 0.007548537 |
| 858.519985 | 344.939072  | 7.78479E-06 | 0.006683402 |
| 858.559985 | 321.667222  | 7.25958E-06 | 0.006232786 |
| 858.599985 | 309.499172  | 6.98497E-06 | 0.005997291 |
| 858.639985 | 338.318641  | 7.63538E-06 | 0.006556043 |
| 858.679985 | 379.332873  | 8.56101E-06 | 0.007351172 |
| 858.719985 | 395.931075  | 8.93561E-06 | 0.007673189 |
| 858.759985 | 378.354341  | 8.53893E-06 | 0.007332892 |
| 858.799985 | 344.558287  | 7.7762E-06  | 0.006678201 |
| 858.839985 | 337.935425  | 7.62673E-06 | 0.006550142 |
| 858.879985 | 330.294559  | 7.45429E-06 | 0.006402339 |
| 858.919985 | 331.542379  | 7.48245E-06 | 0.006426826 |
| 858.959985 | 378.83156   | 8.5497E-06  | 0.007343851 |
| 858.999985 | 508.20196   | 1.14694E-05 | 0.009852223 |
| 859.039985 | 671.115073  | 1.51461E-05 | 0.013011133 |
| 859.079985 | 846.42996   | 1.91027E-05 | 0.016410786 |
| 859.119985 | 984.817016  | 2.22259E-05 | 0.019094756 |
| 859.159985 | 1093.200224 | 2.4672E-05  | 0.021197201 |
| 859.199985 | 1153.84589  | 2.60407E-05 | 0.022374164 |
| 859.239985 | 1128.498361 | 2.54686E-05 | 0.021883671 |
| 859.279985 | 1042.301918 | 2.35233E-05 | 0.020213103 |
| 859.319985 | 908.336403  | 2.04999E-05 | 0.017615963 |
| 859.359985 | 738.374087  | 1.66641E-05 | 0.014320439 |
| 859.399985 | 576.08028   | 1.30013E-05 | 0.011173342 |
| 859.439985 | 420.964652  | 9.50059E-06 | 0.008165183 |
| 859.479985 | 326.334872  | 7.36492E-06 | 0.006330004 |
| 859.519985 | 288.448109  | 6.50987E-06 | 0.005595365 |
| 859.559985 | 296.661389  | 6.69523E-06 | 0.005754956 |
| 859.599985 | 342.033555  | 7.71922E-06 | 0.006635442 |
| 859.639985 | 371.928104  | 8.3939E-06  | 0.007215731 |
| 859.679985 | 390.09315   | 8.80386E-06 | 0.007568501 |
| 859.719985 | 404.514972  | 9.12934E-06 | 0.007848676 |
| 859.759985 | 373.028016  | 8.41872E-06 | 0.007238081 |
| 859.799985 | 344.09253   | 7.76569E-06 | 0.006676939 |
| 859.839985 | 318.242783  | 7.1823E-06  | 0.006175626 |
| 859.879985 | 320.85365   | 7.24122E-06 | 0.00622658  |
| 859.919985 | 332.442613  | 7.50277E-06 | 0.006451779 |
| 859.959985 | 354.536393  | 8.00139E-06 | 0.006880877 |
| 859.999985 | 404.533508  | 9.12976E-06 | 0.007851592 |
| 860.039985 | 484.822054  | 1.09418E-05 | 0.00941035  |
| 860.079985 | 604.233651  | 1.36367E-05 | 0.011728663 |
| 860.119985 | 758.028376  | 1.71076E-05 | 0.014714627 |
| 860.159985 | 909.324778  | 2.05222E-05 | 0.01765237  |
| 860.199985 | 966.616575  | 2.18152E-05 | 0.018765426 |
| 860.239985 | 939.673939  | 2.12071E-05 | 0.018243223 |

|            |             |             |             |
|------------|-------------|-------------|-------------|
| 860.279985 | 876.683816  | 1.97855E-05 | 0.017021098 |
| 860.319985 | 799.978505  | 1.80544E-05 | 0.015532562 |
| 860.359985 | 689.150065  | 1.55532E-05 | 0.013381314 |
| 860.399985 | 570.92032   | 1.28849E-05 | 0.011086147 |
| 860.439985 | 475.311694  | 1.07271E-05 | 0.009230045 |
| 860.479985 | 392.412028  | 8.85619E-06 | 0.007620577 |
| 860.519985 | 349.44414   | 7.88647E-06 | 0.006786463 |
| 860.559985 | 354.225587  | 7.99438E-06 | 0.006879642 |
| 860.599985 | 358.801948  | 8.09766E-06 | 0.006968846 |
| 860.639985 | 323.372051  | 7.29806E-06 | 0.006280999 |
| 860.679985 | 344.802189  | 7.78171E-06 | 0.006697558 |
| 860.719985 | 390.452349  | 8.81197E-06 | 0.007584635 |
| 860.759985 | 427.354063  | 9.64479E-06 | 0.008301846 |
| 860.799985 | 423.90697   | 9.56699E-06 | 0.008235265 |
| 860.839985 | 393.521683  | 8.88124E-06 | 0.007645323 |
| 860.879985 | 369.720617  | 8.34408E-06 | 0.007183251 |
| 860.919985 | 372.641673  | 8.41E-06    | 0.00724034  |
| 860.959985 | 409.363115  | 9.23876E-06 | 0.007954199 |
| 860.999985 | 499.915442  | 1.12824E-05 | 0.009714142 |
| 861.039985 | 643.842791  | 1.45306E-05 | 0.012511458 |
| 861.079985 | 797.408743  | 1.79964E-05 | 0.015496344 |
| 861.119985 | 979.944555  | 2.2116E-05  | 0.019044516 |
| 861.159985 | 1123.018826 | 2.5345E-05  | 0.021826075 |
| 861.199985 | 1200.328913 | 2.70898E-05 | 0.023329694 |
| 861.239985 | 1183.156686 | 2.67022E-05 | 0.022997001 |
| 861.279985 | 1072.236008 | 2.41989E-05 | 0.020842005 |
| 861.319985 | 914.518263  | 2.06394E-05 | 0.017777131 |
| 861.359985 | 706.294791  | 1.59401E-05 | 0.013730155 |
| 861.399985 | 512.44926   | 1.15653E-05 | 0.00996232  |
| 861.439985 | 402.246103  | 9.07813E-06 | 0.007820268 |
| 861.479985 | 374.6621    | 8.4556E-06  | 0.007284332 |
| 861.519985 | 360.448534  | 8.13482E-06 | 0.007008311 |
| 861.559985 | 356.569921  | 8.04729E-06 | 0.00693322  |
| 861.599985 | 359.586012  | 8.11536E-06 | 0.00699219  |
| 861.639985 | 374.87708   | 8.46045E-06 | 0.007289865 |
| 861.679985 | 380.508797  | 8.58755E-06 | 0.007399723 |
| 861.719985 | 356.058333  | 8.03574E-06 | 0.006924558 |
| 861.759985 | 349.604546  | 7.89009E-06 | 0.006799362 |
| 861.799985 | 328.895833  | 7.42272E-06 | 0.006396901 |
| 861.839985 | 301.394402  | 6.80205E-06 | 0.00586228  |
| 861.879985 | 278.391832  | 6.28292E-06 | 0.005415119 |
| 861.919985 | 293.606128  | 6.62628E-06 | 0.005711324 |
| 861.959985 | 333.942171  | 7.53661E-06 | 0.006496256 |
| 861.999985 | 388.312578  | 8.76367E-06 | 0.007554287 |
| 862.039985 | 476.613635  | 1.07565E-05 | 0.009272538 |
| 862.079985 | 617.075058  | 1.39265E-05 | 0.012005778 |

|            |             |             |             |
|------------|-------------|-------------|-------------|
| 862.119985 | 772.886958  | 1.7443E-05  | 0.015037943 |
| 862.159985 | 880.414415  | 1.98697E-05 | 0.017130884 |
| 862.199985 | 910.986     | 2.05597E-05 | 0.01772656  |
| 862.239985 | 890.982295  | 2.01082E-05 | 0.017338119 |
| 862.279985 | 834.081343  | 1.88241E-05 | 0.016231605 |
| 862.319985 | 760.184341  | 1.71563E-05 | 0.014794222 |
| 862.359985 | 648.396173  | 1.46334E-05 | 0.012619257 |
| 862.399985 | 527.997439  | 1.19162E-05 | 0.010276502 |
| 862.439985 | 441.050227  | 9.95389E-06 | 0.008584632 |
| 862.479985 | 376.900244  | 8.50611E-06 | 0.007336353 |
| 862.519985 | 332.237792  | 7.49814E-06 | 0.006467299 |
| 862.559985 | 341.513569  | 7.70749E-06 | 0.006648169 |
| 862.599985 | 361.499683  | 8.15854E-06 | 0.00703756  |
| 862.639985 | 355.907085  | 8.03233E-06 | 0.006929007 |
| 862.679985 | 353.722707  | 7.98303E-06 | 0.006886799 |
| 862.719985 | 384.100246  | 8.66861E-06 | 0.007478581 |
| 862.759985 | 420.912622  | 9.49941E-06 | 0.008195712 |
| 862.799985 | 423.528987  | 9.55846E-06 | 0.008247039 |
| 862.839985 | 373.689294  | 8.43365E-06 | 0.007276888 |
| 862.879985 | 344.674863  | 7.77883E-06 | 0.006712198 |
| 862.919985 | 395.215026  | 8.91945E-06 | 0.007696774 |
| 862.959985 | 474.177326  | 1.07015E-05 | 0.009234985 |
| 862.999985 | 544.303315  | 1.22842E-05 | 0.010601237 |
| 863.039985 | 656.714935  | 1.48211E-05 | 0.012791238 |
| 863.079985 | 846.240486  | 1.90985E-05 | 0.016483506 |
| 863.119985 | 1082.872179 | 2.44389E-05 | 0.021093717 |
| 863.159985 | 1297.646746 | 2.92861E-05 | 0.025278572 |
| 863.199985 | 1365.868007 | 3.08257E-05 | 0.026608777 |
| 863.239985 | 1352.407482 | 3.0522E-05  | 0.02634777  |
| 863.279985 | 1228.735072 | 2.77308E-05 | 0.023939478 |
| 863.319985 | 1013.847418 | 2.28811E-05 | 0.019753732 |
| 863.359985 | 800.402855  | 1.8064E-05  | 0.015595715 |
| 863.399985 | 587.882291  | 1.32677E-05 | 0.011455319 |
| 863.439985 | 430.217845  | 9.70942E-06 | 0.008383499 |
| 863.479985 | 380.942526  | 8.59734E-06 | 0.007423633 |
| 863.519985 | 373.350538  | 8.426E-06   | 0.007276021 |
| 863.559985 | 361.395334  | 8.15619E-06 | 0.007043359 |
| 863.599985 | 336.562231  | 7.59574E-06 | 0.006559682 |
| 863.639985 | 339.438814  | 7.66066E-06 | 0.006616053 |
| 863.679985 | 341.095515  | 7.69805E-06 | 0.006648652 |
| 863.719985 | 320.229977  | 7.22714E-06 | 0.006242229 |
| 863.759985 | 337.092931  | 7.60772E-06 | 0.006571242 |
| 863.799985 | 336.857548  | 7.60241E-06 | 0.006566958 |
| 863.839985 | 311.418016  | 7.02827E-06 | 0.006071301 |
| 863.879985 | 300.686316  | 6.78607E-06 | 0.005862351 |
| 863.919985 | 329.989792  | 7.44741E-06 | 0.006433966 |

|            |             |             |             |
|------------|-------------|-------------|-------------|
| 863.959985 | 364.189072  | 8.21924E-06 | 0.007101095 |
| 863.999985 | 412.212423  | 9.30306E-06 | 0.008037844 |
| 864.039985 | 522.094645  | 1.17829E-05 | 0.010180939 |
| 864.079985 | 631.401748  | 1.42499E-05 | 0.012313017 |
| 864.119985 | 735.875407  | 1.66077E-05 | 0.014351031 |
| 864.159985 | 867.367696  | 1.95753E-05 | 0.016916174 |
| 864.199985 | 956.621673  | 2.15896E-05 | 0.018657748 |
| 864.239985 | 937.490667  | 2.11579E-05 | 0.018285467 |
| 864.279985 | 857.574097  | 1.93543E-05 | 0.016727493 |
| 864.319985 | 757.703291  | 1.71003E-05 | 0.014780138 |
| 864.359985 | 646.292405  | 1.45859E-05 | 0.012607485 |
| 864.399985 | 512.677427  | 1.15704E-05 | 0.010001467 |
| 864.439985 | 408.760375  | 9.22515E-06 | 0.007974591 |
| 864.479985 | 342.115958  | 7.72108E-06 | 0.00667472  |
| 864.519985 | 325.113295  | 7.33735E-06 | 0.006343289 |
| 864.559985 | 338.975704  | 7.65021E-06 | 0.006614065 |
| 864.599985 | 338.913772  | 7.64881E-06 | 0.006613163 |
| 864.639985 | 348.233618  | 7.85915E-06 | 0.006795333 |
| 864.679985 | 359.369919  | 8.11048E-06 | 0.007012968 |
| 864.719985 | 375.305995  | 8.47013E-06 | 0.007324294 |
| 864.759985 | 412.206492  | 9.30293E-06 | 0.008044798 |
| 864.799985 | 414.701422  | 9.35923E-06 | 0.008093865 |
| 864.839985 | 373.72746   | 8.43451E-06 | 0.0072945   |
| 864.879985 | 360.338229  | 8.13233E-06 | 0.007033491 |
| 864.919985 | 371.601987  | 8.38654E-06 | 0.007253685 |
| 864.959985 | 434.154718  | 9.79827E-06 | 0.008475109 |
| 864.999985 | 503.046723  | 1.13531E-05 | 0.0098204   |
| 865.039985 | 632.976882  | 1.42854E-05 | 0.012357448 |
| 865.079985 | 827.445824  | 1.86743E-05 | 0.016154763 |
| 865.119985 | 1018.501955 | 2.29862E-05 | 0.019885795 |
| 865.159985 | 1141.569205 | 2.57636E-05 | 0.022289659 |
| 865.199985 | 1194.098502 | 2.69491E-05 | 0.023316395 |
| 865.239985 | 1142.88091  | 2.57932E-05 | 0.022317334 |
| 865.279985 | 1026.531263 | 2.31674E-05 | 0.020046271 |
| 865.319985 | 912.804839  | 2.06007E-05 | 0.017826227 |
| 865.359985 | 784.758518  | 1.77109E-05 | 0.01532631  |
| 865.399985 | 611.502396  | 1.38008E-05 | 0.011943175 |
| 865.439985 | 460.911236  | 1.04021E-05 | 0.009002415 |
| 865.479985 | 365.008215  | 8.23773E-06 | 0.007129588 |
| 865.519985 | 345.620008  | 7.80016E-06 | 0.006751196 |
| 865.559985 | 343.276298  | 7.74727E-06 | 0.006705725 |
| 865.599985 | 333.287059  | 7.52182E-06 | 0.006510891 |
| 865.639985 | 359.868877  | 8.12174E-06 | 0.007030502 |
| 865.679985 | 372.67229   | 8.41069E-06 | 0.00728097  |
| 865.719985 | 363.640555  | 8.20686E-06 | 0.007104843 |
| 865.759985 | 355.458763  | 8.02221E-06 | 0.006945308 |

|            |             |             |             |
|------------|-------------|-------------|-------------|
| 865.799985 | 338.071558  | 7.6298E-06  | 0.006605884 |
| 865.839985 | 310.203928  | 7.00087E-06 | 0.006061634 |
| 865.879985 | 287.881333  | 6.49708E-06 | 0.005625692 |
| 865.919985 | 296.127533  | 6.68319E-06 | 0.005787104 |
| 865.959985 | 329.713111  | 7.44117E-06 | 0.006443752 |
| 865.999985 | 411.775955  | 9.29321E-06 | 0.00804792  |
| 866.039985 | 547.271557  | 1.23512E-05 | 0.010696596 |
| 866.079985 | 650.845455  | 1.46887E-05 | 0.012721568 |
| 866.119985 | 800.586124  | 1.80681E-05 | 0.015649154 |
| 866.159985 | 924.602684  | 2.0867E-05  | 0.018074156 |
| 866.199985 | 945.575981  | 2.13403E-05 | 0.018484996 |
| 866.239985 | 946.377166  | 2.13584E-05 | 0.018501513 |
| 866.279985 | 911.467331  | 2.05705E-05 | 0.017819854 |
| 866.319985 | 827.182718  | 1.86684E-05 | 0.016172775 |
| 866.359985 | 675.017214  | 1.52342E-05 | 0.0131983   |
| 866.399985 | 501.296081  | 1.13136E-05 | 0.009802063 |
| 866.439985 | 401.713213  | 9.06611E-06 | 0.007855238 |
| 866.479985 | 367.462315  | 8.29311E-06 | 0.007185816 |
| 866.519985 | 354.559128  | 8.00191E-06 | 0.006933811 |
| 866.559985 | 333.192789  | 7.5197E-06  | 0.006516269 |
| 866.599985 | 330.108748  | 7.45009E-06 | 0.006456252 |
| 866.639985 | 356.433254  | 8.0442E-06  | 0.006971427 |
| 866.679985 | 386.433153  | 8.72126E-06 | 0.00755854  |
| 866.719985 | 408.578117  | 9.22104E-06 | 0.007992059 |
| 866.759985 | 414.654617  | 9.35818E-06 | 0.008111293 |
| 866.799985 | 392.529855  | 8.85885E-06 | 0.007678853 |
| 866.839985 | 369.86853   | 8.34742E-06 | 0.007235875 |
| 866.879985 | 346.605402  | 7.8224E-06  | 0.006781083 |
| 866.919985 | 345.016523  | 7.78654E-06 | 0.006750309 |
| 866.959985 | 397.327193  | 8.96712E-06 | 0.007774135 |
| 866.999985 | 489.5964    | 1.10495E-05 | 0.009579924 |
| 867.039985 | 646.728532  | 1.45958E-05 | 0.012655109 |
| 867.079985 | 902.257433  | 2.03627E-05 | 0.017656084 |
| 867.119985 | 1202.996103 | 2.71499E-05 | 0.023542261 |
| 867.159985 | 1456.143278 | 3.28631E-05 | 0.028497587 |
| 867.199985 | 1546.266955 | 3.48971E-05 | 0.030262757 |
| 867.239985 | 1492.347868 | 3.36802E-05 | 0.029208827 |
| 867.279985 | 1357.01839  | 3.0626E-05  | 0.02656133  |
| 867.319985 | 1148.543205 | 2.5921E-05  | 0.022481819 |
| 867.359985 | 885.92831   | 1.99942E-05 | 0.017342141 |
| 867.399985 | 651.721683  | 1.47085E-05 | 0.01275811  |
| 867.439985 | 493.650843  | 1.1141E-05  | 0.009664159 |
| 867.479985 | 420.369723  | 9.48716E-06 | 0.008229921 |
| 867.519985 | 392.663659  | 8.86187E-06 | 0.007687851 |
| 867.559985 | 358.172974  | 8.08347E-06 | 0.007012891 |
| 867.599985 | 361.187901  | 8.15151E-06 | 0.007072248 |

|            |             |             |             |
|------------|-------------|-------------|-------------|
| 867.639985 | 387.985319  | 8.75629E-06 | 0.007597306 |
| 867.679985 | 401.467925  | 9.06057E-06 | 0.007861677 |
| 867.719985 | 385.232322  | 8.69416E-06 | 0.007544094 |
| 867.759985 | 348.472294  | 7.86453E-06 | 0.006824528 |
| 867.799985 | 308.520314  | 6.96287E-06 | 0.006042382 |
| 867.839985 | 268.777261  | 6.06593E-06 | 0.005264255 |
| 867.879985 | 251.103148  | 5.66705E-06 | 0.004918318 |
| 867.919985 | 263.618976  | 5.94951E-06 | 0.005163701 |
| 867.959985 | 319.873022  | 7.21909E-06 | 0.00626588  |
| 867.999985 | 432.880696  | 9.76951E-06 | 0.008479938 |
| 868.039985 | 572.779837  | 1.29268E-05 | 0.011221017 |
| 868.079985 | 712.916429  | 1.60895E-05 | 0.013967    |
| 868.119985 | 828.385358  | 1.86955E-05 | 0.01622994  |
| 868.159985 | 922.924784  | 2.08291E-05 | 0.018083014 |
| 868.199985 | 1019.549098 | 2.30098E-05 | 0.019977111 |
| 868.239985 | 1089.963074 | 2.45989E-05 | 0.021357791 |
| 868.279985 | 1047.072014 | 2.3631E-05  | 0.020518287 |
| 868.319985 | 894.089768  | 2.01784E-05 | 0.017521274 |
| 868.359985 | 719.277601  | 1.62331E-05 | 0.014096169 |
| 868.399985 | 563.197466  | 1.27106E-05 | 0.01103787  |
| 868.439985 | 459.072864  | 1.03606E-05 | 0.00899759  |
| 868.479985 | 408.02521   | 9.20856E-06 | 0.007997451 |
| 868.519985 | 397.08096   | 8.96156E-06 | 0.007783298 |
| 868.559985 | 391.57316   | 8.83726E-06 | 0.007675691 |
| 868.599985 | 385.299127  | 8.69566E-06 | 0.007553054 |
| 868.639985 | 382.873258  | 8.64092E-06 | 0.007505845 |
| 868.679985 | 394.861444  | 8.91147E-06 | 0.007741218 |
| 868.719985 | 401.033393  | 9.05077E-06 | 0.007862581 |
| 868.759985 | 367.933465  | 8.30375E-06 | 0.007213962 |
| 868.799985 | 344.165948  | 7.76735E-06 | 0.00674827  |
| 868.839985 | 331.465955  | 7.48072E-06 | 0.006499553 |
| 868.879985 | 344.00019   | 7.76361E-06 | 0.006745641 |
| 868.919985 | 365.872346  | 8.25723E-06 | 0.007174871 |
| 868.959985 | 402.865474  | 9.09211E-06 | 0.007900682 |
| 868.999985 | 469.505039  | 1.05961E-05 | 0.009207989 |
| 869.039985 | 611.346099  | 1.37972E-05 | 0.011990344 |
| 869.079985 | 808.968978  | 1.82573E-05 | 0.015867057 |
| 869.119985 | 950.774101  | 2.14576E-05 | 0.01864927  |
| 869.159985 | 1110.935682 | 2.50723E-05 | 0.021791815 |
| 869.199985 | 1239.619431 | 2.79765E-05 | 0.024317159 |
| 869.239985 | 1256.509007 | 2.83577E-05 | 0.02464961  |
| 869.279985 | 1174.484826 | 2.65065E-05 | 0.023041558 |
| 869.319985 | 1032.703122 | 2.33067E-05 | 0.020260955 |
| 869.359985 | 822.558313  | 1.8564E-05  | 0.016138795 |
| 869.399985 | 631.035385  | 1.42416E-05 | 0.012381638 |
| 869.439985 | 501.938623  | 1.13281E-05 | 0.009849064 |



|            |             |             |             |
|------------|-------------|-------------|-------------|
| 869.479985 | 404.653236  | 9.13246E-06 | 0.007940491 |
| 869.519985 | 343.207011  | 7.7457E-06  | 0.006735045 |
| 869.559985 | 322.658799  | 7.28196E-06 | 0.006332101 |
| 869.599985 | 339.543896  | 7.66303E-06 | 0.006663773 |
| 869.639985 | 347.158557  | 7.83489E-06 | 0.006813529 |
| 869.679985 | 343.800645  | 7.7591E-06  | 0.006747935 |
| 869.719985 | 363.566351  | 8.20519E-06 | 0.007136214 |
| 869.759985 | 357.360769  | 8.06513E-06 | 0.007014732 |
| 869.799985 | 335.497791  | 7.57172E-06 | 0.00658588  |
| 869.839985 | 304.870252  | 6.8805E-06  | 0.005984931 |
| 869.879985 | 287.765692  | 6.49447E-06 | 0.00564941  |
| 869.919985 | 291.531276  | 6.57945E-06 | 0.005723599 |
| 869.959985 | 314.20894   | 7.09126E-06 | 0.006169111 |
| 869.999985 | 370.706187  | 8.36632E-06 | 0.0072787   |
| 870.039985 | 448.265117  | 1.01167E-05 | 0.00880195  |
| 870.079985 | 537.873342  | 1.21391E-05 | 0.010561946 |
| 870.119985 | 689.378369  | 1.55583E-05 | 0.013537596 |
| 870.159985 | 870.873192  | 1.96544E-05 | 0.017102468 |
| 870.199985 | 929.654657  | 2.0981E-05  | 0.018257675 |
| 870.239985 | 910.151704  | 2.05409E-05 | 0.017875474 |
| 870.279985 | 860.459705  | 1.94194E-05 | 0.016900295 |
| 870.319985 | 707.054282  | 1.59572E-05 | 0.013887896 |
| 870.359985 | 544.470646  | 1.22879E-05 | 0.010694935 |
| 870.399985 | 457.77461   | 1.03313E-05 | 0.008992394 |
| 870.439985 | 407.62848   | 9.19961E-06 | 0.008007706 |
| 870.479985 | 365.836154  | 8.25641E-06 | 0.007187042 |
| 870.519985 | 343.938188  | 7.76221E-06 | 0.006757155 |
| 870.559985 | 348.248491  | 7.85948E-06 | 0.006842152 |
| 870.599985 | 378.466994  | 8.54147E-06 | 0.007436206 |
| 870.639985 | 393.274499  | 8.87566E-06 | 0.007727502 |
| 870.679985 | 388.367073  | 8.7649E-06  | 0.007631426 |
| 870.719985 | 366.406963  | 8.26929E-06 | 0.00720024  |
| 870.759985 | 346.719717  | 7.82498E-06 | 0.00681368  |
| 870.799985 | 327.748787  | 7.39683E-06 | 0.006441163 |
| 870.839985 | 305.285543  | 6.88987E-06 | 0.005999974 |
| 870.879985 | 310.868296  | 7.01586E-06 | 0.006109976 |
| 870.919985 | 342.850875  | 7.73767E-06 | 0.006738889 |
| 870.959985 | 393.059066  | 8.8708E-06  | 0.007726108 |
| 870.999985 | 453.042985  | 1.02245E-05 | 0.008905582 |
| 871.039985 | 562.232272  | 1.26888E-05 | 0.011052452 |
| 871.079985 | 745.562241  | 1.68263E-05 | 0.014657054 |
| 871.119985 | 941.86134   | 2.12565E-05 | 0.018516961 |
| 871.159985 | 1079.777041 | 2.43691E-05 | 0.021229353 |
| 871.199985 | 1188.417499 | 2.68209E-05 | 0.023366392 |
| 871.239985 | 1197.252871 | 2.70203E-05 | 0.023541192 |
| 871.279985 | 1084.278041 | 2.44706E-05 | 0.021320783 |

|            |            |             |             |
|------------|------------|-------------|-------------|
| 871.319985 | 902.876225 | 2.03767E-05 | 0.01775459  |
| 871.359985 | 744.983249 | 1.68132E-05 | 0.01465038  |
| 871.399985 | 604.958738 | 1.36531E-05 | 0.01189729  |
| 871.439985 | 478.070817 | 1.07894E-05 | 0.009402308 |
| 871.479985 | 380.606513 | 8.58976E-06 | 0.007485803 |
| 871.519985 | 307.014258 | 6.92888E-06 | 0.006038661 |
| 871.559985 | 311.646282 | 7.03342E-06 | 0.00613005  |
| 871.599985 | 324.367138 | 7.32051E-06 | 0.00638056  |
| 871.639985 | 325.81077  | 7.3531E-06  | 0.006409252 |
| 871.679985 | 344.83847  | 7.78252E-06 | 0.00678387  |
| 871.719985 | 355.219071 | 8.0168E-06  | 0.006988404 |
| 871.759985 | 352.326648 | 7.95152E-06 | 0.006931818 |
| 871.799985 | 322.712018 | 7.28316E-06 | 0.006349459 |
| 871.839985 | 284.934629 | 6.43058E-06 | 0.005606435 |
| 871.879985 | 292.805162 | 6.6082E-06  | 0.005761561 |
| 871.919985 | 308.595321 | 6.96457E-06 | 0.006072545 |
| 871.959985 | 329.556234 | 7.43763E-06 | 0.006485312 |
| 871.999985 | 395.251872 | 8.92028E-06 | 0.007778488 |
| 872.039985 | 449.769467 | 1.01507E-05 | 0.00885179  |
| 872.079985 | 561.166677 | 1.26648E-05 | 0.011044675 |
| 872.119985 | 684.85228  | 1.54562E-05 | 0.013479628 |
| 872.159985 | 780.455111 | 1.76138E-05 | 0.015362038 |
| 872.199985 | 870.518792 | 1.96464E-05 | 0.017135587 |
| 872.239985 | 904.020716 | 2.04025E-05 | 0.017795866 |
| 872.279985 | 852.089101 | 1.92305E-05 | 0.016774349 |
| 872.319985 | 789.165143 | 1.78104E-05 | 0.015536331 |
| 872.359985 | 724.574969 | 1.63526E-05 | 0.014265396 |
| 872.399985 | 596.078132 | 1.34527E-05 | 0.011736094 |
| 872.439985 | 502.25557  | 1.13352E-05 | 0.009889289 |
| 872.479985 | 482.33608  | 1.08857E-05 | 0.009497515 |
| 872.519985 | 514.742593 | 1.1617E-05  | 0.010136085 |
| 872.559985 | 529.137007 | 1.19419E-05 | 0.010420011 |
| 872.599985 | 504.771324 | 1.1392E-05  | 0.009940647 |
| 872.639985 | 463.960942 | 1.0471E-05  | 0.009137372 |
| 872.679985 | 420.832519 | 9.4976E-06  | 0.008288369 |
| 872.719985 | 408.549495 | 9.22039E-06 | 0.008046821 |
| 872.759985 | 408.086498 | 9.20994E-06 | 0.00803807  |
| 872.799985 | 414.171998 | 9.34729E-06 | 0.00815831  |
| 872.839985 | 394.746741 | 8.90888E-06 | 0.00777603  |
| 872.879985 | 378.313886 | 8.53802E-06 | 0.007452665 |
| 872.919985 | 410.523124 | 9.26494E-06 | 0.008087547 |
| 872.959985 | 432.967844 | 9.77148E-06 | 0.008530112 |
| 872.999985 | 471.603308 | 1.06434E-05 | 0.009291714 |
| 873.039985 | 547.323671 | 1.23523E-05 | 0.010784081 |
| 873.079985 | 693.946338 | 1.56614E-05 | 0.013673657 |
| 873.119985 | 904.547437 | 2.04144E-05 | 0.017824199 |

|            |             |             |             |
|------------|-------------|-------------|-------------|
| 873.159985 | 1053.593472 | 2.37781E-05 | 0.020762118 |
| 873.199985 | 1144.191359 | 2.58228E-05 | 0.022548473 |
| 873.239985 | 1110.133148 | 2.50542E-05 | 0.021878293 |
| 873.279985 | 1014.961554 | 2.29063E-05 | 0.020003586 |
| 873.319985 | 897.503975  | 2.02554E-05 | 0.017689458 |
| 873.359985 | 732.902412  | 1.65406E-05 | 0.014445886 |
| 873.399985 | 578.575765  | 1.30576E-05 | 0.011404551 |
| 873.439985 | 482.859439  | 1.08975E-05 | 0.009518282 |
| 873.479985 | 434.576871  | 9.80779E-06 | 0.008566912 |
| 873.519985 | 412.379967  | 9.30684E-06 | 0.008129712 |
| 873.559985 | 403.826874  | 9.11381E-06 | 0.00796146  |
| 873.599985 | 421.791199  | 9.51924E-06 | 0.008316008 |
| 873.639985 | 437.924477  | 9.88335E-06 | 0.008634486 |
| 873.679985 | 426.300772  | 9.62101E-06 | 0.008405688 |
| 873.719985 | 402.198657  | 9.07706E-06 | 0.007930812 |
| 873.759985 | 367.589178  | 8.29598E-06 | 0.007248692 |
| 873.799985 | 325.317987  | 7.34197E-06 | 0.006415417 |
| 873.839985 | 289.530202  | 6.53429E-06 | 0.005709927 |
| 873.879985 | 324.575687  | 7.32522E-06 | 0.006401364 |
| 873.919985 | 360.665145  | 8.13971E-06 | 0.007113455 |
| 873.959985 | 369.596964  | 8.34129E-06 | 0.007289953 |
| 873.999985 | 409.239917  | 9.23597E-06 | 0.008072242 |
| 874.039985 | 473.485216  | 1.06859E-05 | 0.009339905 |
| 874.079985 | 573.743994  | 1.29486E-05 | 0.011318115 |
| 874.119985 | 726.317656  | 1.6392E-05  | 0.014328555 |
| 874.159985 | 869.246556  | 1.96177E-05 | 0.017148994 |
| 874.199985 | 929.985942  | 2.09885E-05 | 0.018348135 |
| 874.239985 | 930.810509  | 2.10071E-05 | 0.018365244 |
| 874.279985 | 892.361112  | 2.01393E-05 | 0.017607428 |
| 874.319985 | 830.105868  | 1.87343E-05 | 0.016379802 |
| 874.359985 | 727.825428  | 1.6426E-05  | 0.014362242 |
| 874.399985 | 578.911416  | 1.30652E-05 | 0.011424232 |
| 874.439985 | 474.184357  | 1.07017E-05 | 0.009357977 |
| 874.479985 | 400.692882  | 9.04308E-06 | 0.007907993 |
| 874.519985 | 346.647834  | 7.82336E-06 | 0.006841684 |
| 874.559985 | 318.868463  | 7.19642E-06 | 0.006293698 |
| 874.599985 | 308.627253  | 6.96529E-06 | 0.00609184  |
| 874.639985 | 342.137652  | 7.72157E-06 | 0.006753594 |
| 874.679985 | 384.741623  | 8.68308E-06 | 0.007594918 |
| 874.719985 | 409.109666  | 9.23304E-06 | 0.008076321 |
| 874.759985 | 428.807297  | 9.67758E-06 | 0.008465563 |
| 874.799985 | 433.630874  | 9.78644E-06 | 0.008561182 |
| 874.839985 | 415.761997  | 9.38317E-06 | 0.008208772 |
| 874.879985 | 374.659559  | 8.45554E-06 | 0.007397587 |
| 874.919985 | 347.778839  | 7.84888E-06 | 0.006867145 |
| 874.959985 | 386.348044  | 8.71934E-06 | 0.007629071 |

|            |             |             |             |
|------------|-------------|-------------|-------------|
| 874.999985 | 465.436569  | 1.05043E-05 | 0.009191223 |
| 875.039985 | 573.988278  | 1.29541E-05 | 0.011335369 |
| 875.079985 | 715.370808  | 1.61449E-05 | 0.014128099 |
| 875.119985 | 853.706101  | 1.9267E-05  | 0.0168609   |
| 875.159985 | 979.439938  | 2.21046E-05 | 0.019345057 |
| 875.199985 | 1100.473817 | 2.48362E-05 | 0.021736608 |
| 875.239985 | 1104.839509 | 2.49347E-05 | 0.021823837 |
| 875.279985 | 980.024909  | 2.21178E-05 | 0.019359265 |
| 875.319985 | 819.809259  | 1.8502E-05  | 0.016195129 |
| 875.359985 | 670.34749   | 1.51288E-05 | 0.013243154 |
| 875.399985 | 528.568628  | 1.19291E-05 | 0.010442697 |
| 875.439985 | 413.073255  | 9.32249E-06 | 0.008161279 |
| 875.479985 | 323.636696  | 7.30403E-06 | 0.006394532 |
| 875.519985 | 282.084883  | 6.36626E-06 | 0.00557379  |
| 875.559985 | 314.05959   | 7.08789E-06 | 0.006205871 |
| 875.599985 | 322.643133  | 7.28161E-06 | 0.006375774 |
| 875.639985 | 338.758371  | 7.6453E-06  | 0.006694534 |
| 875.679985 | 368.663538  | 8.32022E-06 | 0.007285852 |
| 875.719985 | 365.190261  | 8.24184E-06 | 0.00721754  |
| 875.759985 | 341.094499  | 7.69803E-06 | 0.006741625 |
| 875.799985 | 317.485415  | 7.1652E-06  | 0.006275285 |
| 875.839985 | 287.209612  | 6.48192E-06 | 0.005677125 |
| 875.879985 | 272.726128  | 6.15505E-06 | 0.005391084 |
| 875.919985 | 276.886064  | 6.24893E-06 | 0.005473565 |
| 875.959985 | 312.087233  | 7.04337E-06 | 0.006169714 |
| 875.999985 | 406.564674  | 9.1756E-06  | 0.008037824 |
| 876.039985 | 527.431884  | 1.19034E-05 | 0.010427857 |
| 876.079985 | 650.178427  | 1.46736E-05 | 0.012855266 |
| 876.119985 | 771.234801  | 1.74057E-05 | 0.015249477 |
| 876.159985 | 870.636192  | 1.9649E-05  | 0.017215708 |
| 876.199985 | 898.594538  | 2.028E-05   | 0.017769359 |
| 876.239985 | 868.181336  | 1.95936E-05 | 0.017168734 |
| 876.279985 | 825.158907  | 1.86227E-05 | 0.016318688 |
| 876.319985 | 734.855377  | 1.65847E-05 | 0.014533471 |
| 876.359985 | 596.950988  | 1.34724E-05 | 0.01180663  |
| 876.399985 | 510.288637  | 1.15165E-05 | 0.010093064 |
| 876.439985 | 478.285937  | 1.07942E-05 | 0.00946051  |
| 876.479985 | 460.539147  | 1.03937E-05 | 0.009109894 |
| 876.519985 | 420.495854  | 9.49001E-06 | 0.00831818  |
| 876.559985 | 384.824869  | 8.68496E-06 | 0.00761289  |
| 876.599985 | 372.956272  | 8.4171E-06  | 0.007378433 |
| 876.639985 | 390.238269  | 8.80713E-06 | 0.007720686 |
| 876.679985 | 428.037847  | 9.66022E-06 | 0.00846892  |
| 876.719985 | 447.613322  | 1.0102E-05  | 0.008856633 |
| 876.759985 | 441.029148  | 9.95341E-06 | 0.008726755 |
| 876.799985 | 423.602233  | 9.56011E-06 | 0.008382306 |

|            |             |             |             |
|------------|-------------|-------------|-------------|
| 876.839985 | 406.293394  | 9.16948E-06 | 0.008040163 |
| 876.879985 | 378.430215  | 8.54064E-06 | 0.007489119 |
| 876.919985 | 363.916905  | 8.2131E-06  | 0.007202229 |
| 876.959985 | 404.155637  | 9.12123E-06 | 0.007998954 |
| 876.999985 | 508.588766  | 1.14781E-05 | 0.010066329 |
| 877.039985 | 635.484519  | 1.4342E-05  | 0.012578508 |
| 877.079985 | 791.500097  | 1.78631E-05 | 0.015667328 |
| 877.119985 | 967.351184  | 2.18318E-05 | 0.019149081 |
| 877.159985 | 1123.065137 | 2.5346E-05  | 0.022232511 |
| 877.199985 | 1218.407849 | 2.74978E-05 | 0.024121042 |
| 877.239985 | 1226.256826 | 2.76749E-05 | 0.024277536 |
| 877.279985 | 1155.452697 | 2.6077E-05  | 0.022876793 |
| 877.319985 | 1028.94322  | 2.32218E-05 | 0.020372963 |
| 877.359985 | 912.654326  | 2.05973E-05 | 0.018071279 |
| 877.399985 | 781.558092  | 1.76387E-05 | 0.015476175 |
| 877.439985 | 626.18818   | 1.41322E-05 | 0.012400153 |
| 877.479985 | 527.469479  | 1.19043E-05 | 0.010445742 |
| 877.519985 | 507.680329  | 1.14576E-05 | 0.010054306 |
| 877.559985 | 468.546229  | 1.05744E-05 | 0.009279702 |
| 877.599985 | 414.528354  | 9.35533E-06 | 0.008210235 |
| 877.639985 | 389.703835  | 8.79507E-06 | 0.007718908 |
| 877.679985 | 346.346431  | 7.81656E-06 | 0.006860435 |
| 877.719985 | 332.741563  | 7.50951E-06 | 0.00659125  |
| 877.759985 | 342.165047  | 7.72219E-06 | 0.006778228 |
| 877.799985 | 318.348084  | 7.18467E-06 | 0.006306706 |
| 877.839985 | 306.047519  | 6.90707E-06 | 0.006063299 |
| 877.879985 | 292.398555  | 6.59903E-06 | 0.005793155 |
| 877.919985 | 297.364248  | 6.7111E-06  | 0.005891806 |
| 877.959985 | 322.631027  | 7.28133E-06 | 0.006392719 |
| 877.999985 | 381.200489  | 8.60316E-06 | 0.007553578 |
| 878.039985 | 487.366829  | 1.09992E-05 | 0.009657729 |
| 878.079985 | 577.096659  | 1.30243E-05 | 0.011436349 |
| 878.119985 | 675.163471  | 1.52375E-05 | 0.013380352 |
| 878.159985 | 798.96489   | 1.80315E-05 | 0.015834563 |
| 878.199985 | 847.958569  | 1.91372E-05 | 0.016806327 |
| 878.239985 | 838.062684  | 1.89139E-05 | 0.01661095  |
| 878.279985 | 814.106107  | 1.83732E-05 | 0.01613685  |
| 878.319985 | 742.009092  | 1.67461E-05 | 0.014708445 |
| 878.359985 | 656.432322  | 1.48148E-05 | 0.013012695 |
| 878.399985 | 575.024087  | 1.29775E-05 | 0.011399429 |
| 878.439985 | 493.870264  | 1.1146E-05  | 0.00979106  |
| 878.479985 | 445.344727  | 1.00508E-05 | 0.008829436 |
| 878.519985 | 437.762771  | 9.8797E-06  | 0.00867951  |
| 878.559985 | 433.220431  | 9.77718E-06 | 0.008589841 |
| 878.599985 | 412.595852  | 9.31171E-06 | 0.008181272 |
| 878.639985 | 387.096548  | 8.73623E-06 | 0.007676001 |

|            |             |             |             |
|------------|-------------|-------------|-------------|
| 878.679985 | 386.496911  | 8.7227E-06  | 0.007664459 |
| 878.719985 | 406.814009  | 9.18123E-06 | 0.008067726 |
| 878.759985 | 424.698022  | 9.58484E-06 | 0.008422776 |
| 878.799985 | 405.164569  | 9.144E-06   | 0.008035747 |
| 878.839985 | 381.18851   | 8.60289E-06 | 0.007560567 |
| 878.879985 | 371.506727  | 8.38439E-06 | 0.007368872 |
| 878.919985 | 357.642109  | 8.07148E-06 | 0.007094189 |
| 878.959985 | 416.10341   | 9.39087E-06 | 0.008254203 |
| 878.999985 | 568.963635  | 1.28407E-05 | 0.01128699  |
| 879.039985 | 733.292146  | 1.65494E-05 | 0.014547569 |
| 879.079985 | 866.406573  | 1.95536E-05 | 0.017189169 |
| 879.119985 | 979.455774  | 2.2105E-05  | 0.019432906 |
| 879.159985 | 1074.468511 | 2.42493E-05 | 0.021318977 |
| 879.199985 | 1144.743472 | 2.58353E-05 | 0.022714365 |
| 879.239985 | 1164.54455  | 2.62821E-05 | 0.023108316 |
| 879.279985 | 1083.065293 | 2.44433E-05 | 0.021492483 |
| 879.319985 | 918.349832  | 2.07259E-05 | 0.018224677 |
| 879.359985 | 745.182093  | 1.68177E-05 | 0.014788832 |
| 879.399985 | 579.892193  | 1.30874E-05 | 0.011509023 |
| 879.439985 | 442.37009   | 9.98368E-06 | 0.008780045 |
| 879.479985 | 376.340021  | 8.49347E-06 | 0.007469837 |
| 879.519985 | 361.459962  | 8.15765E-06 | 0.007174814 |
| 879.559985 | 340.786564  | 7.69108E-06 | 0.006764765 |
| 879.599985 | 315.829799  | 7.12784E-06 | 0.006269647 |
| 879.639985 | 328.002281  | 7.40255E-06 | 0.006511583 |
| 879.679985 | 338.015931  | 7.62855E-06 | 0.006710682 |
| 879.719985 | 337.043961  | 7.60661E-06 | 0.006691689 |
| 879.759985 | 334.209035  | 7.54263E-06 | 0.006635706 |
| 879.799985 | 313.009826  | 7.0642E-06  | 0.006215079 |
| 879.839985 | 308.375085  | 6.9596E-06  | 0.006123331 |
| 879.879985 | 309.389448  | 6.98249E-06 | 0.006143752 |
| 879.919985 | 314.400522  | 7.09558E-06 | 0.006243544 |
| 879.959985 | 348.549789  | 7.86628E-06 | 0.006922014 |
| 879.999985 | 409.992197  | 9.25295E-06 | 0.008142598 |
| 880.039985 | 492.000443  | 1.11038E-05 | 0.009771757 |
| 880.079985 | 589.501357  | 1.33042E-05 | 0.011708782 |
| 880.119985 | 710.92166   | 1.60445E-05 | 0.014121095 |
| 880.159985 | 839.191941  | 1.89394E-05 | 0.016669696 |
| 880.199985 | 893.03005   | 2.01544E-05 | 0.017739942 |
| 880.239985 | 899.175902  | 2.02931E-05 | 0.01786284  |
| 880.279985 | 876.1663    | 1.97739E-05 | 0.017406527 |
| 880.319985 | 798.302095  | 1.80166E-05 | 0.015860343 |
| 880.359985 | 669.869014  | 1.5118E-05  | 0.013309292 |
| 880.399985 | 512.096976  | 1.15573E-05 | 0.01017506  |
| 880.439985 | 414.778869  | 9.36098E-06 | 0.008241782 |
| 880.479985 | 372.248859  | 8.40114E-06 | 0.007397034 |

|            |             |             |             |
|------------|-------------|-------------|-------------|
| 880.519985 | 312.351551  | 7.04934E-06 | 0.006207084 |
| 880.559985 | 296.969649  | 6.70219E-06 | 0.005901682 |
| 880.599985 | 330.635423  | 7.46198E-06 | 0.00657102  |
| 880.639985 | 370.802363  | 8.36849E-06 | 0.007369629 |
| 880.679985 | 419.962638  | 9.47797E-06 | 0.00834706  |
| 880.719985 | 412.576855  | 9.31128E-06 | 0.008200635 |
| 880.759985 | 362.734017  | 8.1864E-06  | 0.007210255 |
| 880.799985 | 337.575585  | 7.61861E-06 | 0.006710472 |
| 880.839985 | 341.450962  | 7.70607E-06 | 0.006787817 |
| 880.879985 | 354.976754  | 8.01133E-06 | 0.007057021 |
| 880.919985 | 360.846339  | 8.1438E-06  | 0.007174036 |
| 880.959985 | 391.772227  | 8.84175E-06 | 0.007789231 |
| 880.999985 | 473.223999  | 1.068E-05   | 0.009409086 |
| 881.039985 | 612.531405  | 1.3824E-05  | 0.01217948  |
| 881.079985 | 765.153738  | 1.72685E-05 | 0.015214889 |
| 881.119985 | 936.3138    | 2.11313E-05 | 0.018619209 |
| 881.159985 | 1068.248616 | 2.41089E-05 | 0.021243783 |
| 881.199985 | 1183.033805 | 2.66994E-05 | 0.023527533 |
| 881.239985 | 1196.932964 | 2.70131E-05 | 0.023805032 |
| 881.279985 | 1059.048217 | 2.39012E-05 | 0.021063687 |
| 881.319985 | 885.860918  | 1.99926E-05 | 0.017619919 |
| 881.359985 | 715.818968  | 1.6155E-05  | 0.014238403 |
| 881.399985 | 534.436328  | 1.20615E-05 | 0.010630991 |
| 881.439985 | 402.455309  | 9.08286E-06 | 0.008005992 |
| 881.479985 | 343.735164  | 7.75762E-06 | 0.00683819  |
| 881.519985 | 296.23034   | 6.68551E-06 | 0.005893407 |
| 881.559985 | 285.604478  | 6.4457E-06  | 0.005682267 |
| 881.599985 | 320.132574  | 7.22495E-06 | 0.006369513 |
| 881.639985 | 330.789093  | 7.46545E-06 | 0.006581838 |
| 881.679985 | 348.799506  | 7.87192E-06 | 0.006940513 |
| 881.719985 | 357.364632  | 8.06522E-06 | 0.007111267 |
| 881.759985 | 339.059627  | 7.6521E-06  | 0.006747319 |
| 881.799985 | 311.122911  | 7.02161E-06 | 0.006191656 |
| 881.839985 | 271.58309   | 6.12925E-06 | 0.00540502  |
| 881.879985 | 271.297084  | 6.1228E-06  | 0.005399572 |
| 881.919985 | 270.95374   | 6.11505E-06 | 0.005392983 |
| 881.959985 | 297.690047  | 6.71845E-06 | 0.005925404 |
| 881.999985 | 363.914663  | 8.21305E-06 | 0.007243907 |
| 882.039985 | 458.208326  | 1.03411E-05 | 0.009121285 |
| 882.079985 | 609.327542  | 1.37517E-05 | 0.012130076 |
| 882.119985 | 738.140292  | 1.66588E-05 | 0.014695059 |
| 882.159985 | 802.718528  | 1.81162E-05 | 0.015981421 |
| 882.199985 | 850.459828  | 1.91937E-05 | 0.016932676 |
| 882.239985 | 908.235535  | 2.04976E-05 | 0.018083812 |
| 882.279985 | 855.525317  | 1.9308E-05  | 0.017035075 |
| 882.319985 | 743.929808  | 1.67895E-05 | 0.014813676 |

|            |             |             |             |
|------------|-------------|-------------|-------------|
| 882.359985 | 616.439407  | 1.39122E-05 | 0.01227555  |
| 882.399985 | 522.231254  | 1.1786E-05  | 0.010399994 |
| 882.439985 | 427.38006   | 9.64537E-06 | 0.008511463 |
| 882.479985 | 354.282826  | 7.99567E-06 | 0.007056019 |
| 882.519985 | 309.207287  | 6.97838E-06 | 0.006158558 |
| 882.559985 | 316.162446  | 7.13535E-06 | 0.006297371 |
| 882.599985 | 342.896267  | 7.73869E-06 | 0.006830169 |
| 882.639985 | 366.899864  | 8.28042E-06 | 0.007308629 |
| 882.679985 | 395.601624  | 8.92818E-06 | 0.007880724 |
| 882.719985 | 401.796334  | 9.06798E-06 | 0.00800449  |
| 882.759985 | 393.816542  | 8.88789E-06 | 0.007845874 |
| 882.799985 | 389.628518  | 8.79337E-06 | 0.00776279  |
| 882.839985 | 381.167365  | 8.60242E-06 | 0.007594557 |
| 882.879985 | 367.984102  | 8.30489E-06 | 0.00733222  |
| 882.919985 | 387.671769  | 8.74921E-06 | 0.007724854 |
| 882.959985 | 429.408768  | 9.69116E-06 | 0.008556905 |
| 882.999985 | 503.681072  | 1.13674E-05 | 0.010037397 |
| 883.039985 | 602.246881  | 1.35919E-05 | 0.012002168 |
| 883.079985 | 704.702218  | 1.59041E-05 | 0.014044634 |
| 883.119985 | 839.262022  | 1.8941E-05  | 0.016727153 |
| 883.159985 | 968.166132  | 2.18502E-05 | 0.019297188 |
| 883.199985 | 1051.491635 | 2.37307E-05 | 0.020958955 |
| 883.239985 | 1065.697361 | 2.40513E-05 | 0.021243074 |
| 883.279985 | 1040.387024 | 2.34801E-05 | 0.02073949  |
| 883.319985 | 914.699574  | 2.06435E-05 | 0.018234812 |
| 883.359985 | 759.240831  | 1.7135E-05  | 0.01513638  |
| 883.399985 | 602.507076  | 1.35977E-05 | 0.012012248 |
| 883.439985 | 474.298221  | 1.07043E-05 | 0.009456563 |
| 883.479985 | 381.644318  | 8.61318E-06 | 0.007609573 |
| 883.519985 | 323.566816  | 7.30245E-06 | 0.006451863 |
| 883.559985 | 321.258155  | 7.25035E-06 | 0.006406118 |
| 883.599985 | 342.788935  | 7.73627E-06 | 0.006835767 |
| 883.639985 | 366.272508  | 8.26626E-06 | 0.007304398 |
| 883.679985 | 366.953415  | 8.28163E-06 | 0.007318308 |
| 883.719985 | 371.898429  | 8.39323E-06 | 0.007417265 |
| 883.759985 | 367.297318  | 8.28939E-06 | 0.00732583  |
| 883.799985 | 325.750711  | 7.35174E-06 | 0.006497468 |
| 883.839985 | 286.503404  | 6.46598E-06 | 0.005714894 |
| 883.879985 | 260.070118  | 5.86942E-06 | 0.005187863 |
| 883.919985 | 288.547263  | 6.51211E-06 | 0.005756184 |
| 883.959985 | 343.265408  | 7.74702E-06 | 0.006848058 |
| 883.999985 | 389.133722  | 8.78221E-06 | 0.00776347  |
| 884.039985 | 453.380658  | 1.02322E-05 | 0.009045647 |
| 884.079985 | 537.145919  | 1.21226E-05 | 0.010717379 |
| 884.119985 | 695.71759   | 1.57014E-05 | 0.013881901 |
| 884.159985 | 820.885358  | 1.85262E-05 | 0.016380159 |



|            |             |             |             |
|------------|-------------|-------------|-------------|
| 884.199985 | 879.142593  | 1.9841E-05  | 0.017543433 |
| 884.239985 | 896.929006  | 2.02424E-05 | 0.017899173 |
| 884.279985 | 810.060259  | 1.82819E-05 | 0.016166346 |
| 884.319985 | 657.155062  | 1.48311E-05 | 0.013115415 |
| 884.359985 | 543.106051  | 1.22571E-05 | 0.01083973  |
| 884.399985 | 460.706382  | 1.03975E-05 | 0.00919555  |
| 884.439985 | 412.536354  | 9.31037E-06 | 0.008234464 |
| 884.479985 | 389.684761  | 8.79464E-06 | 0.007778685 |
| 884.519985 | 339.739479  | 7.66745E-06 | 0.00678201  |
| 884.559985 | 307.336344  | 6.93615E-06 | 0.006135444 |
| 884.599985 | 318.462275  | 7.18725E-06 | 0.006357841 |
| 884.639985 | 318.175468  | 7.18078E-06 | 0.006352403 |
| 884.679985 | 302.951184  | 6.83719E-06 | 0.006048722 |
| 884.719985 | 329.895259  | 7.44528E-06 | 0.006586985 |
| 884.759985 | 372.446072  | 8.40559E-06 | 0.007436929 |
| 884.799985 | 371.83818   | 8.39187E-06 | 0.007425126 |
| 884.839985 | 362.232104  | 8.17507E-06 | 0.007233632 |
| 884.879985 | 379.308246  | 8.56046E-06 | 0.007574979 |
| 884.919985 | 386.529925  | 8.72344E-06 | 0.007719548 |
| 884.959985 | 406.207907  | 9.16755E-06 | 0.008112912 |
| 884.999985 | 507.636037  | 1.14566E-05 | 0.010139125 |
| 885.039985 | 644.703194  | 1.45501E-05 | 0.012877379 |
| 885.079985 | 776.522328  | 1.7525E-05  | 0.015511051 |
| 885.119985 | 928.619418  | 2.09576E-05 | 0.018550032 |
| 885.159985 | 1056.43549  | 2.38423E-05 | 0.02110423  |
| 885.199985 | 1141.429036 | 2.57605E-05 | 0.022803162 |
| 885.239985 | 1142.258752 | 2.57792E-05 | 0.022820769 |
| 885.279985 | 1027.600415 | 2.31915E-05 | 0.02053098  |
| 885.319985 | 887.261619  | 2.00243E-05 | 0.017727877 |
| 885.359985 | 750.661065  | 1.69414E-05 | 0.014999215 |
| 885.399985 | 589.113482  | 1.32955E-05 | 0.01177181  |
| 885.439985 | 451.714733  | 1.01946E-05 | 0.009026682 |
| 885.479985 | 378.246285  | 8.53649E-06 | 0.007558893 |
| 885.519985 | 322.115273  | 7.26969E-06 | 0.006437458 |
| 885.559985 | 302.704907  | 6.83163E-06 | 0.006049816 |
| 885.599985 | 302.563526  | 6.82844E-06 | 0.006047264 |
| 885.639985 | 342.540934  | 7.73067E-06 | 0.006846592 |
| 885.679985 | 388.513389  | 8.76821E-06 | 0.007765825 |
| 885.719985 | 404.498445  | 9.12897E-06 | 0.008085708 |
| 885.759985 | 383.376795  | 8.65228E-06 | 0.007663844 |
| 885.799985 | 327.516086  | 7.39158E-06 | 0.006547463 |
| 885.839985 | 289.761206  | 6.53951E-06 | 0.005792957 |
| 885.879985 | 279.602508  | 6.31024E-06 | 0.005590115 |
| 885.919985 | 302.600599  | 6.82927E-06 | 0.00605019  |
| 885.959985 | 327.780528  | 7.39755E-06 | 0.006553933 |
| 885.999985 | 364.361741  | 8.22314E-06 | 0.007285699 |

|            |             |             |             |
|------------|-------------|-------------|-------------|
| 886.039985 | 428.929038  | 9.68033E-06 | 0.00857716  |
| 886.079985 | 541.381416  | 1.22182E-05 | 0.010826324 |
| 886.119985 | 688.153905  | 1.55307E-05 | 0.013762042 |
| 886.159985 | 781.519782  | 1.76378E-05 | 0.015629924 |
| 886.199985 | 816.718266  | 1.84322E-05 | 0.01633461  |
| 886.239985 | 835.594861  | 1.88582E-05 | 0.016712902 |
| 886.279985 | 833.733992  | 1.88162E-05 | 0.016676435 |
| 886.319985 | 747.065384  | 1.68602E-05 | 0.014943554 |
| 886.359985 | 645.371744  | 1.45651E-05 | 0.012909958 |
| 886.399985 | 553.902041  | 1.25008E-05 | 0.011080707 |
| 886.439985 | 436.19072   | 9.84422E-06 | 0.008726308 |
| 886.479985 | 374.61122   | 8.45445E-06 | 0.007494704 |
| 886.519985 | 338.845572  | 7.64727E-06 | 0.00677946  |
| 886.559985 | 323.801474  | 7.30775E-06 | 0.006478757 |
| 886.599985 | 321.5508    | 7.25695E-06 | 0.006434015 |
| 886.639985 | 318.548968  | 7.18921E-06 | 0.006374238 |
| 886.679985 | 331.256686  | 7.476E-06   | 0.006628821 |
| 886.719985 | 356.316265  | 8.04156E-06 | 0.007130614 |
| 886.759985 | 360.802775  | 8.14282E-06 | 0.007220723 |
| 886.799985 | 341.364875  | 7.70413E-06 | 0.006832022 |
| 886.839985 | 352.23205   | 7.94939E-06 | 0.007049834 |
| 886.879985 | 348.64407   | 7.86841E-06 | 0.006978336 |
| 886.919985 | 337.379375  | 7.61418E-06 | 0.006753171 |
| 886.959985 | 398.539341  | 8.99448E-06 | 0.007977742 |
| 886.999985 | 495.769013  | 1.11888E-05 | 0.00992448  |
| 887.039985 | 635.569702  | 1.43439E-05 | 0.012723633 |
| 887.079985 | 780.347608  | 1.76114E-05 | 0.015622684 |
| 887.119985 | 915.311455  | 2.06573E-05 | 0.018325508 |
| 887.159985 | 1003.211503 | 2.26411E-05 | 0.020086266 |
| 887.199985 | 1108.371213 | 2.50144E-05 | 0.02219277  |
| 887.239985 | 1140.647924 | 2.57428E-05 | 0.022840072 |
| 887.279985 | 999.75827   | 2.25632E-05 | 0.020019833 |
| 887.319985 | 825.183591  | 1.86232E-05 | 0.016524777 |
| 887.359985 | 654.35834   | 1.4768E-05  | 0.013104493 |
| 887.399985 | 533.476055  | 1.20398E-05 | 0.010684129 |
| 887.439985 | 449.210402  | 1.01381E-05 | 0.008996914 |
| 887.479985 | 414.423976  | 9.35297E-06 | 0.008300575 |
| 887.519985 | 394.399446  | 8.90105E-06 | 0.007899856 |
| 887.559985 | 358.050835  | 8.08071E-06 | 0.007172114 |
| 887.599985 | 349.441295  | 7.8864E-06  | 0.006999971 |
| 887.639985 | 337.667878  | 7.62069E-06 | 0.006764432 |
| 887.679985 | 320.373674  | 7.23039E-06 | 0.00641827  |
| 887.719985 | 341.779833  | 7.71349E-06 | 0.006847423 |
| 887.759985 | 354.312095  | 7.99633E-06 | 0.007098822 |
| 887.799985 | 316.168053  | 7.13547E-06 | 0.006334872 |
| 887.839985 | 272.503175  | 6.15002E-06 | 0.005460231 |

|            |             |             |             |
|------------|-------------|-------------|-------------|
| 887.879985 | 253.494884  | 5.72103E-06 | 0.005079585 |
| 887.919985 | 272.430445  | 6.14838E-06 | 0.005459266 |
| 887.959985 | 321.803216  | 7.26265E-06 | 0.006448943 |
| 887.999985 | 372.069896  | 8.3971E-06  | 0.007456624 |
| 888.039985 | 452.874138  | 1.02207E-05 | 0.009076424 |
| 888.079985 | 556.309629  | 1.25551E-05 | 0.011149963 |
| 888.119985 | 661.901584  | 1.49382E-05 | 0.013266911 |
| 888.159985 | 754.965928  | 1.70385E-05 | 0.01513294  |
| 888.199985 | 812.880447  | 1.83456E-05 | 0.016294543 |
| 888.239985 | 842.470171  | 1.90134E-05 | 0.016888443 |
| 888.279985 | 784.590664  | 1.77071E-05 | 0.015728879 |
| 888.319985 | 721.065011  | 1.62734E-05 | 0.014456016 |
| 888.359985 | 653.561685  | 1.475E-05   | 0.013103289 |
| 888.399985 | 566.822415  | 1.27924E-05 | 0.011364761 |
| 888.439985 | 470.936413  | 1.06284E-05 | 0.009442677 |
| 888.479985 | 389.928088  | 8.80013E-06 | 0.007818743 |
| 888.519985 | 344.331496  | 7.77108E-06 | 0.006904762 |
| 888.559985 | 345.207959  | 7.79086E-06 | 0.006922649 |
| 888.599985 | 357.791909  | 8.07487E-06 | 0.007175325 |
| 888.639985 | 371.629475  | 8.38716E-06 | 0.007453165 |
| 888.679985 | 395.27952   | 8.92091E-06 | 0.007927833 |
| 888.719985 | 418.724538  | 9.45003E-06 | 0.00839843  |
| 888.759985 | 390.861152  | 8.82119E-06 | 0.007839922 |
| 888.799985 | 345.972491  | 7.80812E-06 | 0.006939854 |
| 888.839985 | 340.621979  | 7.68736E-06 | 0.006832836 |
| 888.879985 | 340.948519  | 7.69473E-06 | 0.006839694 |
| 888.919985 | 350.279555  | 7.90532E-06 | 0.007027198 |
| 888.959985 | 416.777811  | 9.40609E-06 | 0.008361642 |
| 888.999985 | 488.29513   | 1.10201E-05 | 0.009796905 |
| 889.039985 | 592.183227  | 1.33648E-05 | 0.011881798 |
| 889.079985 | 729.632028  | 1.64668E-05 | 0.014640283 |
| 889.119985 | 889.613466  | 2.00773E-05 | 0.017851161 |
| 889.159985 | 970.462472  | 2.1902E-05  | 0.01947437  |
| 889.199985 | 1016.438637 | 2.29396E-05 | 0.020397896 |
| 889.239985 | 1054.971332 | 2.38092E-05 | 0.021172122 |
| 889.279985 | 995.904278  | 2.24762E-05 | 0.01998761  |
| 889.319985 | 875.722717  | 1.97638E-05 | 0.01757638  |
| 889.359985 | 716.370371  | 1.61675E-05 | 0.014378711 |
| 889.399985 | 557.366887  | 1.2579E-05  | 0.011187757 |
| 889.439985 | 464.256177  | 1.04776E-05 | 0.00931921  |
| 889.479985 | 403.675705  | 9.1104E-06  | 0.008103517 |
| 889.519985 | 353.970003  | 7.98861E-06 | 0.007106028 |
| 889.559985 | 323.067406  | 7.29118E-06 | 0.006485943 |
| 889.599985 | 319.730348  | 7.21587E-06 | 0.006419237 |
| 889.639985 | 322.318895  | 7.27429E-06 | 0.006471498 |
| 889.679985 | 342.333962  | 7.726E-06   | 0.006873668 |

|            |             |             |             |
|------------|-------------|-------------|-------------|
| 889.719985 | 339.667455  | 7.66582E-06 | 0.006820434 |
| 889.759985 | 319.747093  | 7.21625E-06 | 0.006420727 |
| 889.799985 | 289.482022  | 6.53321E-06 | 0.005813247 |
| 889.839985 | 269.069891  | 6.07253E-06 | 0.005403582 |
| 889.879985 | 267.240735  | 6.03125E-06 | 0.00536709  |
| 889.919985 | 296.632883  | 6.69459E-06 | 0.00595765  |
| 889.959985 | 341.132516  | 7.69889E-06 | 0.0068517   |
| 889.999985 | 361.866546  | 8.16682E-06 | 0.007268473 |
| 890.039985 | 417.856069  | 9.43043E-06 | 0.008393459 |
| 890.079985 | 509.923727  | 1.15083E-05 | 0.010243279 |
| 890.119985 | 651.144763  | 1.46954E-05 | 0.013080696 |
| 890.159985 | 761.99084   | 1.71971E-05 | 0.015308145 |
| 890.199985 | 791.902769  | 1.78721E-05 | 0.015909781 |
| 890.239985 | 794.588413  | 1.79328E-05 | 0.015964454 |
| 890.279985 | 725.641917  | 1.63767E-05 | 0.014579873 |
| 890.319985 | 611.75084   | 1.38064E-05 | 0.012292082 |
| 890.359985 | 528.770368  | 1.19336E-05 | 0.010625209 |
| 890.399985 | 446.941589  | 1.00868E-05 | 0.00898133  |
| 890.439985 | 383.394852  | 8.65269E-06 | 0.007704699 |
| 890.479985 | 338.900476  | 7.64851E-06 | 0.006810847 |
| 890.519985 | 339.544448  | 7.66305E-06 | 0.006824095 |
| 890.559985 | 361.013515  | 8.14757E-06 | 0.007255902 |
| 890.599985 | 373.244314  | 8.4236E-06  | 0.007502062 |
| 890.639985 | 382.548161  | 8.63358E-06 | 0.007689411 |
| 890.679985 | 390.636569  | 8.81612E-06 | 0.007852345 |
| 890.719985 | 394.555222  | 8.90456E-06 | 0.007931471 |
| 890.759985 | 391.432741  | 8.83409E-06 | 0.007869055 |
| 890.799985 | 375.154689  | 8.46672E-06 | 0.007542153 |
| 890.839985 | 361.261364  | 8.15317E-06 | 0.007263166 |
| 890.879985 | 362.411004  | 8.17911E-06 | 0.007286607 |
| 890.919985 | 370.061178  | 8.35177E-06 | 0.007440755 |
| 890.959985 | 404.426361  | 9.12734E-06 | 0.008132094 |
| 890.999985 | 465.126472  | 1.04973E-05 | 0.009353055 |
| 891.039985 | 569.258392  | 1.28474E-05 | 0.011447519 |
| 891.079985 | 693.438531  | 1.56499E-05 | 0.01394535  |
| 891.119985 | 805.382517  | 1.81764E-05 | 0.016197319 |
| 891.159985 | 966.578996  | 2.18143E-05 | 0.019440068 |
| 891.199985 | 1107.289786 | 2.499E-05   | 0.022271077 |
| 891.239985 | 1118.729212 | 2.52482E-05 | 0.02250217  |
| 891.279985 | 1022.458925 | 2.30755E-05 | 0.020566708 |
| 891.319985 | 885.48203   | 1.99841E-05 | 0.017812224 |
| 891.359985 | 733.039492  | 1.65437E-05 | 0.014746375 |
| 891.399985 | 590.492088  | 1.33266E-05 | 0.011879317 |
| 891.439985 | 471.500775  | 1.06411E-05 | 0.009485916 |
| 891.479985 | 380.890869  | 8.59618E-06 | 0.007663319 |
| 891.519985 | 332.351425  | 7.50071E-06 | 0.006687032 |

|            |             |             |             |
|------------|-------------|-------------|-------------|
| 891.559985 | 333.863869  | 7.53484E-06 | 0.006717764 |
| 891.599985 | 349.399296  | 7.88546E-06 | 0.007030672 |
| 891.639985 | 367.700228  | 8.29848E-06 | 0.007399258 |
| 891.679985 | 368.024156  | 8.30579E-06 | 0.007406109 |
| 891.719985 | 371.96931   | 8.39483E-06 | 0.007485837 |
| 891.759985 | 380.871111  | 8.59573E-06 | 0.007665328 |
| 891.799985 | 367.816944  | 8.30112E-06 | 0.007402935 |
| 891.839985 | 343.666636  | 7.75608E-06 | 0.00691718  |
| 891.879985 | 307.599716  | 6.9421E-06  | 0.006191517 |
| 891.919985 | 280.533326  | 6.33125E-06 | 0.005646965 |
| 891.959985 | 329.165808  | 7.42881E-06 | 0.006626205 |
| 891.999985 | 418.450622  | 9.44385E-06 | 0.008423912 |
| 892.039985 | 486.171081  | 1.09722E-05 | 0.009787645 |
| 892.079985 | 561.089192  | 1.2663E-05  | 0.01129641  |
| 892.119985 | 676.349587  | 1.52643E-05 | 0.013617559 |
| 892.159985 | 797.717888  | 1.80034E-05 | 0.016061897 |
| 892.199985 | 914.927141  | 2.06486E-05 | 0.018422708 |
| 892.239985 | 961.387218  | 2.16972E-05 | 0.019359083 |
| 892.279985 | 870.29668   | 1.96414E-05 | 0.017525614 |
| 892.319985 | 753.118115  | 1.69968E-05 | 0.015166608 |
| 892.359985 | 642.447817  | 1.44992E-05 | 0.012938463 |
| 892.399985 | 569.079452  | 1.28433E-05 | 0.011461388 |
| 892.439985 | 501.570692  | 1.13198E-05 | 0.010102199 |
| 892.479985 | 418.732609  | 9.45021E-06 | 0.008434125 |
| 892.519985 | 357.956879  | 8.07859E-06 | 0.007210301 |
| 892.559985 | 331.69131   | 7.48581E-06 | 0.006681535 |
| 892.599985 | 358.896215  | 8.09979E-06 | 0.00722987  |
| 892.639985 | 414.840357  | 9.36237E-06 | 0.008357225 |
| 892.679985 | 459.238375  | 1.03644E-05 | 0.009252066 |
| 892.719985 | 434.556881  | 9.80734E-06 | 0.008755212 |
| 892.759985 | 404.238478  | 9.1231E-06  | 0.008144738 |
| 892.799985 | 398.051004  | 8.98346E-06 | 0.00802043  |
| 892.839985 | 375.945853  | 8.48457E-06 | 0.007575367 |
| 892.879985 | 354.505574  | 8.0007E-06  | 0.007143662 |
| 892.919985 | 376.478768  | 8.4966E-06  | 0.007586785 |
| 892.959985 | 451.108321  | 1.01809E-05 | 0.009091124 |
| 892.999985 | 570.838495  | 1.2883E-05  | 0.011504545 |
| 893.039985 | 681.939961  | 1.53904E-05 | 0.013744274 |
| 893.079985 | 806.571743  | 1.82032E-05 | 0.016256914 |
| 893.119985 | 927.757888  | 2.09382E-05 | 0.018700328 |
| 893.159985 | 1065.511065 | 2.40471E-05 | 0.021477908 |
| 893.199985 | 1144.632893 | 2.58328E-05 | 0.02307383  |
| 893.239985 | 1098.930969 | 2.48013E-05 | 0.02215355  |
| 893.279985 | 1019.67218  | 2.30126E-05 | 0.020556678 |
| 893.319985 | 954.059937  | 2.15318E-05 | 0.019234791 |
| 893.359985 | 853.613012  | 1.92649E-05 | 0.017210452 |

|            |             |             |             |
|------------|-------------|-------------|-------------|
| 893.399985 | 777.919453  | 1.75566E-05 | 0.015685029 |
| 893.439985 | 733.965715  | 1.65646E-05 | 0.014799462 |
| 893.479984 | 689.005827  | 1.55499E-05 | 0.013893526 |
| 893.519984 | 611.771526  | 1.38068E-05 | 0.01233668  |
| 893.559984 | 523.301769  | 1.18102E-05 | 0.010553115 |
| 893.599984 | 468.495203  | 1.05733E-05 | 0.009448287 |
| 893.639984 | 449.164455  | 1.0137E-05  | 0.009058843 |
| 893.679984 | 406.886171  | 9.18285E-06 | 0.008206533 |
| 893.719984 | 372.376686  | 8.40402E-06 | 0.007510843 |
| 893.759984 | 348.596929  | 7.86735E-06 | 0.00703152  |
| 893.799984 | 325.943834  | 7.3561E-06  | 0.006574881 |
| 893.839984 | 314.687677  | 7.10206E-06 | 0.006348107 |
| 893.879984 | 296.850248  | 6.6995E-06  | 0.005988546 |
| 893.919984 | 296.934441  | 6.7014E-06  | 0.005990512 |
| 893.959984 | 336.487311  | 7.59405E-06 | 0.006788777 |
| 893.999984 | 383.700209  | 8.65958E-06 | 0.007741664 |
| 894.039984 | 469.611788  | 1.05985E-05 | 0.009475468 |
| 894.079984 | 601.084392  | 1.35656E-05 | 0.012128765 |
| 894.119984 | 733.642392  | 1.65573E-05 | 0.014804201 |
| 894.159984 | 848.017549  | 1.91386E-05 | 0.017112948 |
| 894.199984 | 920.917892  | 2.07838E-05 | 0.018584904 |
| 894.239984 | 932.135087  | 2.1037E-05  | 0.018812118 |
| 894.279984 | 902.124348  | 2.03597E-05 | 0.018207263 |
| 894.319984 | 798.522401  | 1.80215E-05 | 0.016117022 |
| 894.359984 | 667.293125  | 1.50599E-05 | 0.013468951 |
| 894.399984 | 591.076965  | 1.33398E-05 | 0.011931102 |
| 894.439984 | 516.445096  | 1.16554E-05 | 0.010425097 |
| 894.479984 | 476.226844  | 1.07478E-05 | 0.009613671 |
| 894.519984 | 460.509811  | 1.03931E-05 | 0.009296804 |
| 894.559984 | 409.350587  | 9.23847E-06 | 0.008264368 |
| 894.599984 | 360.844474  | 8.14376E-06 | 0.007285405 |
| 894.639984 | 340.627422  | 7.68749E-06 | 0.006877533 |
| 894.679984 | 357.417997  | 8.06643E-06 | 0.00721687  |
| 894.719984 | 367.0801    | 8.28449E-06 | 0.007412296 |
| 894.759984 | 345.523449  | 7.79798E-06 | 0.006977323 |
| 894.799984 | 325.366608  | 7.34307E-06 | 0.00657058  |
| 894.839984 | 311.843995  | 7.03788E-06 | 0.006297781 |
| 894.879984 | 307.274116  | 6.93475E-06 | 0.006205768 |
| 894.919984 | 314.335164  | 7.09411E-06 | 0.006348658 |
| 894.959984 | 368.48453   | 8.31618E-06 | 0.007442651 |
| 894.999984 | 467.797645  | 1.05575E-05 | 0.009448999 |
| 895.039984 | 557.486428  | 1.25817E-05 | 0.011261118 |
| 895.079984 | 725.539591  | 1.63744E-05 | 0.014656414 |
| 895.119984 | 934.653512  | 2.10938E-05 | 0.018881507 |
| 895.159984 | 1040.963753 | 2.34931E-05 | 0.021030085 |
| 895.199984 | 1125.518273 | 2.54014E-05 | 0.022739315 |

|            |             |             |             |
|------------|-------------|-------------|-------------|
| 895.239984 | 1096.220052 | 2.47402E-05 | 0.02214838  |
| 895.279984 | 965.362705  | 2.17869E-05 | 0.019505368 |
| 895.319984 | 837.239816  | 1.88953E-05 | 0.016917372 |
| 895.359984 | 715.705252  | 1.61525E-05 | 0.014462276 |
| 895.399984 | 584.11339   | 1.31826E-05 | 0.011803723 |
| 895.439984 | 469.438401  | 1.05946E-05 | 0.009486802 |
| 895.479984 | 416.073738  | 9.3902E-06  | 0.00840874  |
| 895.519984 | 395.131063  | 8.91756E-06 | 0.007985851 |
| 895.559984 | 383.084769  | 8.64569E-06 | 0.007742734 |
| 895.599984 | 346.167103  | 7.81251E-06 | 0.006996883 |
| 895.639984 | 314.879397  | 7.10639E-06 | 0.006364766 |
| 895.679984 | 317.528329  | 7.16617E-06 | 0.006418597 |
| 895.719984 | 341.497374  | 7.70712E-06 | 0.006903421 |
| 895.759984 | 362.774234  | 8.18731E-06 | 0.007333864 |
| 895.799984 | 345.414524  | 7.79552E-06 | 0.006983231 |
| 895.839984 | 307.621218  | 6.94258E-06 | 0.006219443 |
| 895.879984 | 289.454941  | 6.53259E-06 | 0.005852421 |
| 895.919984 | 286.496401  | 6.46582E-06 | 0.005792862 |
| 895.959984 | 315.594657  | 7.12253E-06 | 0.006381503 |
| 895.999984 | 383.57848   | 8.65683E-06 | 0.007756521 |
| 896.039984 | 448.914025  | 1.01314E-05 | 0.009078107 |
| 896.079984 | 535.525937  | 1.20861E-05 | 0.010830089 |
| 896.119984 | 615.857453  | 1.3899E-05  | 0.012455212 |
| 896.159984 | 735.235914  | 1.65933E-05 | 0.014870207 |
| 896.199984 | 824.627219  | 1.86107E-05 | 0.016678898 |
| 896.239984 | 840.238157  | 1.8963E-05  | 0.016995403 |
| 896.279984 | 804.904659  | 1.81656E-05 | 0.016281443 |
| 896.319984 | 728.218379  | 1.64349E-05 | 0.014730906 |
| 896.359984 | 612.39062   | 1.38208E-05 | 0.012388415 |
| 896.399984 | 495.452837  | 1.11817E-05 | 0.010023258 |
| 896.439984 | 415.392923  | 9.37484E-06 | 0.008403981 |
| 896.479984 | 370.410972  | 8.35966E-06 | 0.007494268 |
| 896.519984 | 316.630605  | 7.14591E-06 | 0.006406453 |
| 896.559984 | 316.008784  | 7.13188E-06 | 0.006394157 |
| 896.599984 | 345.290719  | 7.79273E-06 | 0.006986962 |
| 896.639984 | 332.223197  | 7.49781E-06 | 0.006722841 |
| 896.679984 | 339.978168  | 7.67283E-06 | 0.006880076 |
| 896.719984 | 358.024101  | 8.08011E-06 | 0.007245592 |
| 896.759984 | 356.715848  | 8.05058E-06 | 0.007219438 |
| 896.799984 | 362.45321   | 8.18006E-06 | 0.007335881 |
| 896.839984 | 379.001771  | 8.55354E-06 | 0.007671159 |
| 896.879984 | 406.821754  | 9.1814E-06  | 0.008234614 |
| 896.919984 | 439.351844  | 9.91556E-06 | 0.008893463 |
| 896.959984 | 472.283469  | 1.06588E-05 | 0.009560499 |
| 896.999984 | 530.45792   | 1.19717E-05 | 0.010738611 |
| 897.039984 | 665.489576  | 1.50192E-05 | 0.013472799 |

|            |             |             |             |
|------------|-------------|-------------|-------------|
| 897.079984 | 826.133532  | 1.86447E-05 | 0.016725772 |
| 897.119984 | 973.968262  | 2.19811E-05 | 0.01971969  |
| 897.159984 | 1060.926139 | 2.39436E-05 | 0.021481262 |
| 897.199984 | 1091.991041 | 2.46447E-05 | 0.022111239 |
| 897.239984 | 1087.193122 | 2.45364E-05 | 0.02201507  |
| 897.279984 | 998.584957  | 2.25367E-05 | 0.020221704 |
| 897.319984 | 844.760935  | 1.90651E-05 | 0.017107475 |
| 897.359984 | 665.871397  | 1.50278E-05 | 0.013485337 |
| 897.399984 | 521.82636   | 1.17769E-05 | 0.010568585 |
| 897.439984 | 425.964298  | 9.61342E-06 | 0.008627468 |
| 897.479984 | 358.528082  | 8.09148E-06 | 0.007261941 |
| 897.519984 | 313.975086  | 7.08598E-06 | 0.006359809 |
| 897.559984 | 292.412386  | 6.59934E-06 | 0.005923304 |
| 897.599984 | 314.430268  | 7.09625E-06 | 0.006369597 |
| 897.639984 | 355.757643  | 8.02895E-06 | 0.007207111 |
| 897.679984 | 385.195937  | 8.69334E-06 | 0.007803834 |
| 897.719984 | 385.140083  | 8.69208E-06 | 0.00780305  |
| 897.759984 | 360.683815  | 8.14013E-06 | 0.007307884 |
| 897.799984 | 334.024503  | 7.53847E-06 | 0.006768036 |
| 897.839984 | 312.922557  | 7.06223E-06 | 0.006340749 |
| 897.879984 | 327.300967  | 7.38673E-06 | 0.006632394 |
| 897.919984 | 350.845755  | 7.9181E-06  | 0.00710982  |
| 897.959984 | 358.574501  | 8.09253E-06 | 0.007266765 |
| 897.999984 | 393.725876  | 8.88584E-06 | 0.007979488 |
| 898.039984 | 491.62719   | 1.10953E-05 | 0.00996406  |
| 898.079984 | 621.19145   | 1.40194E-05 | 0.012590566 |
| 898.119984 | 733.754304  | 1.65598E-05 | 0.014872699 |
| 898.159984 | 808.163229  | 1.82391E-05 | 0.016381646 |
| 898.199984 | 815.045125  | 1.83944E-05 | 0.01652188  |
| 898.239984 | 808.905722  | 1.82559E-05 | 0.016398157 |
| 898.279984 | 784.14108   | 1.7697E-05  | 0.015896836 |
| 898.319984 | 718.673788  | 1.62195E-05 | 0.014570271 |
| 898.359984 | 629.050406  | 1.41968E-05 | 0.012753829 |
| 898.399984 | 544.732825  | 1.22939E-05 | 0.011044805 |
| 898.439984 | 451.623197  | 1.01925E-05 | 0.009157355 |
| 898.479984 | 392.36709   | 8.85518E-06 | 0.007956201 |
| 898.519984 | 380.564964  | 8.58882E-06 | 0.007717227 |
| 898.559984 | 380.484923  | 8.58701E-06 | 0.007715948 |
| 898.599984 | 377.695732  | 8.52407E-06 | 0.007659726 |
| 898.639984 | 377.314759  | 8.51547E-06 | 0.007652341 |
| 898.679984 | 401.520217  | 9.06175E-06 | 0.008143615 |
| 898.719984 | 396.170191  | 8.94101E-06 | 0.008035464 |
| 898.759984 | 385.581398  | 8.70204E-06 | 0.007821041 |
| 898.799984 | 385.918435  | 8.70964E-06 | 0.007828226 |
| 898.839984 | 371.738487  | 8.38962E-06 | 0.007540926 |
| 898.879984 | 377.971646  | 8.53029E-06 | 0.00766771  |



|            |             |             |             |
|------------|-------------|-------------|-------------|
| 898.919984 | 399.417599  | 9.0143E-06  | 0.008103133 |
| 898.959984 | 443.570271  | 1.00108E-05 | 0.008999276 |
| 898.999984 | 481.272249  | 1.08616E-05 | 0.009764618 |
| 899.039984 | 543.909232  | 1.22753E-05 | 0.011035962 |
| 899.079984 | 686.855628  | 1.55014E-05 | 0.013936976 |
| 899.119984 | 838.391078  | 1.89213E-05 | 0.017012536 |
| 899.159984 | 962.709166  | 2.1727E-05  | 0.019536053 |
| 899.199984 | 1039.871869 | 2.34685E-05 | 0.021102839 |
| 899.239984 | 1059.850156 | 2.39193E-05 | 0.021509229 |
| 899.279984 | 973.823124  | 2.19778E-05 | 0.019764224 |
| 899.319984 | 821.796802  | 1.85468E-05 | 0.016679516 |
| 899.359984 | 676.356303  | 1.52644E-05 | 0.013728208 |
| 899.399984 | 534.883027  | 1.20716E-05 | 0.010857165 |
| 899.439984 | 418.581349  | 9.4468E-06  | 0.008496828 |
| 899.479984 | 344.579362  | 7.77668E-06 | 0.006994965 |
| 899.519984 | 316.780751  | 7.1493E-06  | 0.006430939 |
| 899.559984 | 304.649647  | 6.87552E-06 | 0.006184941 |
| 899.599984 | 328.062827  | 7.40392E-06 | 0.006660567 |
| 899.639984 | 363.5711    | 8.20529E-06 | 0.00738181  |
| 899.679984 | 386.173466  | 8.7154E-06  | 0.007841068 |
| 899.719984 | 386.865717  | 8.73102E-06 | 0.007855474 |
| 899.759984 | 337.881873  | 7.62552E-06 | 0.006861141 |
| 899.799984 | 278.631037  | 6.28831E-06 | 0.005658225 |
| 899.839984 | 268.668244  | 6.06347E-06 | 0.005456151 |
| 899.879984 | 274.272434  | 6.18995E-06 | 0.005570209 |
| 899.919984 | 267.57293   | 6.03875E-06 | 0.00543439  |
| 899.959984 | 313.786363  | 7.08172E-06 | 0.006373266 |
| 899.999984 | 396.700724  | 8.95298E-06 | 0.008057684 |
| 900.039984 | 482.547559  | 1.08904E-05 | 0.009801819 |
| 900.079984 | 582.60564   | 1.31486E-05 | 0.01183479  |
| 900.119984 | 638.923729  | 1.44196E-05 | 0.012979387 |
| 900.159984 | 680.137349  | 1.53498E-05 | 0.013817233 |
| 900.199984 | 718.733037  | 1.62208E-05 | 0.014601967 |
| 900.239984 | 755.160133  | 1.70429E-05 | 0.015342711 |
| 900.279984 | 719.032702  | 1.62276E-05 | 0.014609353 |
| 900.319984 | 661.197454  | 1.49223E-05 | 0.01343485  |
| 900.359984 | 582.399695  | 1.31439E-05 | 0.011834287 |
| 900.399984 | 492.466295  | 1.11143E-05 | 0.010007296 |
| 900.439984 | 421.610054  | 9.51515E-06 | 0.008567823 |
| 900.479984 | 397.811261  | 8.97805E-06 | 0.008084551 |
| 900.519984 | 408.916964  | 9.22869E-06 | 0.008310616 |
| 900.559984 | 400.787145  | 9.04521E-06 | 0.008145752 |
| 900.599984 | 410.958528  | 9.27476E-06 | 0.00835285  |
| 900.639984 | 418.669708  | 9.44879E-06 | 0.00850996  |
| 900.679984 | 386.927416  | 8.73241E-06 | 0.007865109 |
| 900.719984 | 343.319604  | 7.74825E-06 | 0.006978999 |

|            |             |             |             |
|------------|-------------|-------------|-------------|
| 900.759984 | 329.235896  | 7.4304E-06  | 0.006693003 |
| 900.799984 | 315.932521  | 7.13016E-06 | 0.006422845 |
| 900.839984 | 291.261846  | 6.57337E-06 | 0.005921558 |
| 900.879984 | 297.670371  | 6.71801E-06 | 0.006052117 |
| 900.919984 | 354.231017  | 7.9945E-06  | 0.007202405 |
| 900.959984 | 420.521778  | 9.49059E-06 | 0.008550643 |
| 900.999984 | 525.047371  | 1.18496E-05 | 0.010676478 |
| 901.039984 | 638.403542  | 1.44079E-05 | 0.012982075 |
| 901.079984 | 749.208352  | 1.69086E-05 | 0.015235991 |
| 901.119984 | 863.995944  | 1.94992E-05 | 0.017571105 |
| 901.159984 | 1003.533482 | 2.26484E-05 | 0.020409789 |
| 901.199984 | 1094.784421 | 2.47078E-05 | 0.022266632 |
| 901.239984 | 1050.334104 | 2.37046E-05 | 0.021363513 |
| 901.279984 | 930.521413  | 2.10006E-05 | 0.018927395 |
| 901.319984 | 812.302288  | 1.83325E-05 | 0.016523477 |
| 901.359984 | 697.454534  | 1.57406E-05 | 0.014187927 |
| 901.399984 | 573.939478  | 1.2953E-05  | 0.011675847 |
| 901.439984 | 450.78314   | 1.01735E-05 | 0.009170843 |
| 901.479984 | 372.116091  | 8.39814E-06 | 0.007570757 |
| 901.519984 | 361.85369   | 8.16653E-06 | 0.007362293 |
| 901.559984 | 374.400146  | 8.44969E-06 | 0.007617902 |
| 901.599984 | 385.330787  | 8.69638E-06 | 0.007840655 |
| 901.639984 | 412.686905  | 9.31377E-06 | 0.008397666 |
| 901.679984 | 426.421043  | 9.62373E-06 | 0.008677524 |
| 901.719984 | 421.730722  | 9.51787E-06 | 0.008582458 |
| 901.759984 | 410.745707  | 9.26996E-06 | 0.008359278 |
| 901.799984 | 366.807931  | 8.27834E-06 | 0.007465411 |
| 901.839984 | 332.652184  | 7.5075E-06  | 0.00677056  |
| 901.879984 | 315.158259  | 7.11268E-06 | 0.006414786 |
| 901.919984 | 314.962446  | 7.10826E-06 | 0.006411085 |
| 901.959984 | 338.558099  | 7.64078E-06 | 0.006891682 |
| 901.999984 | 375.10802   | 8.46567E-06 | 0.00763603  |
| 902.039984 | 420.868308  | 9.49841E-06 | 0.008567947 |
| 902.079984 | 534.215578  | 1.20565E-05 | 0.010875929 |
| 902.119984 | 694.642604  | 1.56771E-05 | 0.01414264  |
| 902.159984 | 818.643312  | 1.84756E-05 | 0.016667982 |
| 902.199984 | 907.498436  | 2.0481E-05  | 0.018477936 |
| 902.239984 | 922.106015  | 2.08106E-05 | 0.018776199 |
| 902.279984 | 815.983205  | 1.84156E-05 | 0.016616031 |
| 902.319984 | 708.931271  | 1.59996E-05 | 0.014436751 |
| 902.359984 | 624.14553   | 1.40861E-05 | 0.012710729 |
| 902.399984 | 523.94762   | 1.18248E-05 | 0.01067067  |
| 902.439984 | 452.669095  | 1.02161E-05 | 0.009219427 |
| 902.479984 | 392.861816  | 8.86634E-06 | 0.008001698 |
| 902.519984 | 374.154247  | 8.44414E-06 | 0.007621005 |
| 902.559984 | 355.591087  | 8.0252E-06  | 0.00724322  |

|            |             |             |             |
|------------|-------------|-------------|-------------|
| 902.599984 | 343.245305  | 7.74657E-06 | 0.006992053 |
| 902.639984 | 369.066429  | 8.32932E-06 | 0.007518373 |
| 902.679984 | 394.283569  | 8.89843E-06 | 0.008032436 |
| 902.719984 | 393.32792   | 8.87686E-06 | 0.008013322 |
| 902.759984 | 403.038241  | 9.09601E-06 | 0.008211515 |
| 902.799984 | 411.12113   | 9.27843E-06 | 0.008376568 |
| 902.839984 | 381.687508  | 8.61416E-06 | 0.007777204 |
| 902.879984 | 335.314707  | 7.56759E-06 | 0.006832622 |
| 902.919984 | 337.412874  | 7.61494E-06 | 0.00687568  |
| 902.959984 | 363.348726  | 8.20027E-06 | 0.00740452  |
| 902.999984 | 434.301451  | 9.80158E-06 | 0.008850826 |
| 903.039984 | 511.319391  | 1.15398E-05 | 0.010420871 |
| 903.079984 | 601.100744  | 1.3566E-05  | 0.012251189 |
| 903.119984 | 772.84843   | 1.74421E-05 | 0.01575232  |
| 903.159984 | 983.13217   | 2.21879E-05 | 0.020039245 |
| 903.199984 | 1098.921716 | 2.48011E-05 | 0.022400382 |
| 903.239984 | 1118.429313 | 2.52414E-05 | 0.022799034 |
| 903.279984 | 1036.2121   | 2.33859E-05 | 0.021123983 |
| 903.319984 | 904.290385  | 2.04086E-05 | 0.018435473 |
| 903.359984 | 784.689238  | 1.77093E-05 | 0.015997912 |
| 903.399984 | 657.588518  | 1.48409E-05 | 0.01340723  |
| 903.439984 | 516.72361   | 1.16617E-05 | 0.010535675 |
| 903.479984 | 435.012738  | 9.81763E-06 | 0.008870034 |
| 903.519984 | 403.942313  | 9.11642E-06 | 0.008236863 |
| 903.559984 | 387.640945  | 8.74852E-06 | 0.007904809 |
| 903.599984 | 366.600136  | 8.27365E-06 | 0.007476074 |
| 903.639984 | 329.555499  | 7.43761E-06 | 0.00672092  |
| 903.679984 | 323.242068  | 7.29512E-06 | 0.006592457 |
| 903.719984 | 316.808272  | 7.14992E-06 | 0.006461527 |
| 903.759984 | 314.312818  | 7.0936E-06  | 0.006410914 |
| 903.799984 | 318.886689  | 7.19683E-06 | 0.006504493 |
| 903.839984 | 304.06886   | 6.86241E-06 | 0.006202521 |
| 903.879984 | 290.651848  | 6.55961E-06 | 0.005929098 |
| 903.919984 | 307.142725  | 6.93178E-06 | 0.006265778 |
| 903.959984 | 342.956298  | 7.74005E-06 | 0.006996692 |
| 903.999984 | 390.281434  | 8.80811E-06 | 0.00796253  |
| 904.039984 | 426.132866  | 9.61723E-06 | 0.008694356 |
| 904.079984 | 506.44277   | 1.14297E-05 | 0.01033337  |
| 904.119984 | 626.545337  | 1.41403E-05 | 0.012784488 |
| 904.159984 | 709.146697  | 1.60045E-05 | 0.014470586 |
| 904.199984 | 791.869449  | 1.78714E-05 | 0.016159311 |
| 904.239984 | 840.514951  | 1.89693E-05 | 0.017152756 |
| 904.279984 | 781.347761  | 1.76339E-05 | 0.015946011 |
| 904.319984 | 656.159015  | 1.48086E-05 | 0.013391708 |
| 904.359984 | 538.056684  | 1.21432E-05 | 0.010981815 |
| 904.399984 | 458.860244  | 1.03558E-05 | 0.009365818 |

|            |             |             |             |
|------------|-------------|-------------|-------------|
| 904.439984 | 409.160363  | 9.23418E-06 | 0.008351761 |
| 904.479984 | 340.503694  | 7.68469E-06 | 0.006950652 |
| 904.519984 | 295.922618  | 6.67856E-06 | 0.006040892 |
| 904.559984 | 294.351769  | 6.64311E-06 | 0.006009091 |
| 904.599984 | 296.182461  | 6.68443E-06 | 0.006046731 |
| 904.639984 | 317.020831  | 7.15472E-06 | 0.006472445 |
| 904.679984 | 360.659504  | 8.13958E-06 | 0.007363717 |
| 904.719984 | 409.388273  | 9.23932E-06 | 0.008359    |
| 904.759984 | 418.521484  | 9.44545E-06 | 0.008545862 |
| 904.799984 | 388.473168  | 8.7673E-06  | 0.007932651 |
| 904.839984 | 370.176947  | 8.35438E-06 | 0.007559375 |
| 904.879984 | 374.030551  | 8.44135E-06 | 0.007638407 |
| 904.919984 | 390.288886  | 8.80828E-06 | 0.007970785 |
| 904.959984 | 413.654408  | 9.3356E-06  | 0.008448348 |
| 904.999984 | 447.371309  | 1.00965E-05 | 0.009137375 |
| 905.039984 | 551.318343  | 1.24425E-05 | 0.011260948 |
| 905.079984 | 727.387861  | 1.64161E-05 | 0.014857911 |
| 905.119984 | 914.469906  | 2.06383E-05 | 0.018680149 |
| 905.159984 | 1015.545691 | 2.29195E-05 | 0.020745771 |
| 905.199984 | 1030.920963 | 2.32665E-05 | 0.02106079  |
| 905.239984 | 1004.64763  | 2.26735E-05 | 0.020524957 |
| 905.279984 | 935.32388   | 2.1109E-05  | 0.019109516 |
| 905.319984 | 828.374478  | 1.86953E-05 | 0.016925191 |
| 905.359984 | 698.847357  | 1.5772E-05  | 0.014279348 |
| 905.399984 | 566.91036   | 1.27944E-05 | 0.011584029 |
| 905.439984 | 463.499612  | 1.04605E-05 | 0.009471392 |
| 905.479984 | 389.445297  | 8.78924E-06 | 0.007958479 |
| 905.519984 | 335.065011  | 7.56195E-06 | 0.006847497 |
| 905.559984 | 311.920713  | 7.03962E-06 | 0.006374795 |
| 905.599984 | 305.684429  | 6.89887E-06 | 0.006247618 |
| 905.639984 | 324.191737  | 7.31656E-06 | 0.006626166 |
| 905.679984 | 317.046725  | 7.1553E-06  | 0.006480415 |
| 905.719984 | 302.116759  | 6.81835E-06 | 0.00617552  |
| 905.759984 | 291.272851  | 6.57362E-06 | 0.005954124 |
| 905.799984 | 269.202018  | 6.07551E-06 | 0.005503201 |
| 905.839984 | 262.66655   | 5.92802E-06 | 0.005369836 |
| 905.879984 | 256.314684  | 5.78467E-06 | 0.005240213 |
| 905.919984 | 265.173301  | 5.98459E-06 | 0.005421562 |
| 905.959984 | 302.98245   | 6.83789E-06 | 0.006194856 |
| 905.999984 | 363.927417  | 8.21333E-06 | 0.007441281 |
| 906.039984 | 425.919593  | 9.61241E-06 | 0.00870923  |
| 906.079984 | 553.450119  | 1.24906E-05 | 0.011317481 |
| 906.119984 | 717.796374  | 1.61997E-05 | 0.01467884  |
| 906.159984 | 799.779222  | 1.80499E-05 | 0.0163561   |
| 906.199984 | 819.455843  | 1.8494E-05  | 0.016759242 |
| 906.239984 | 783.09483   | 1.76734E-05 | 0.016016305 |

|            |             |             |             |
|------------|-------------|-------------|-------------|
| 906.279984 | 737.216178  | 1.66379E-05 | 0.015078634 |
| 906.319984 | 660.23506   | 1.49006E-05 | 0.013504699 |
| 906.359984 | 552.394847  | 1.24668E-05 | 0.011299393 |
| 906.399984 | 486.496674  | 1.09796E-05 | 0.009951866 |
| 906.439984 | 415.405896  | 9.37513E-06 | 0.008497995 |
| 906.479984 | 371.507466  | 8.38441E-06 | 0.007600296 |
| 906.519984 | 344.02826   | 7.76424E-06 | 0.007038437 |
| 906.559984 | 324.107733  | 7.31466E-06 | 0.006631178 |
| 906.599984 | 306.815884  | 6.92441E-06 | 0.006277667 |
| 906.639984 | 309.274868  | 6.9799E-06  | 0.006328259 |
| 906.679984 | 326.496762  | 7.36858E-06 | 0.006680941 |
| 906.719984 | 333.924087  | 7.5362E-06  | 0.006833225 |
| 906.759984 | 325.388194  | 7.34356E-06 | 0.006658845 |
| 906.799984 | 327.377582  | 7.38846E-06 | 0.006699852 |
| 906.839984 | 336.646932  | 7.59765E-06 | 0.006889855 |
| 906.879984 | 338.713862  | 7.6443E-06  | 0.006932463 |
| 906.919984 | 337.097047  | 7.60781E-06 | 0.006899676 |
| 906.959984 | 376.461062  | 8.4962E-06  | 0.007705715 |
| 906.999984 | 516.338905  | 1.1653E-05  | 0.010569316 |
| 907.039984 | 661.448722  | 1.4928E-05  | 0.013540271 |
| 907.079984 | 783.697994  | 1.7687E-05  | 0.016043498 |
| 907.119984 | 918.199844  | 2.07225E-05 | 0.018797786 |
| 907.159984 | 1014.237079 | 2.28899E-05 | 0.020764818 |
| 907.199984 | 1075.703195 | 2.42771E-05 | 0.022024205 |
| 907.239984 | 1064.452348 | 2.40232E-05 | 0.021794814 |
| 907.279984 | 991.132508  | 2.23685E-05 | 0.020294474 |
| 907.319984 | 850.679561  | 1.91987E-05 | 0.017419321 |
| 907.359984 | 677.737504  | 1.52956E-05 | 0.013878608 |
| 907.399984 | 528.217725  | 1.19211E-05 | 0.010817241 |
| 907.439984 | 425.11614   | 9.59428E-06 | 0.008706233 |
| 907.479984 | 355.929921  | 8.03284E-06 | 0.007289644 |
| 907.519984 | 325.162171  | 7.33846E-06 | 0.006659797 |
| 907.559984 | 336.731013  | 7.59955E-06 | 0.006897047 |
| 907.599984 | 342.638785  | 7.73288E-06 | 0.007018362 |
| 907.639984 | 334.654369  | 7.55268E-06 | 0.006855117 |
| 907.679984 | 343.761758  | 7.75822E-06 | 0.007041985 |
| 907.719984 | 330.764874  | 7.4649E-06  | 0.006776041 |
| 907.759984 | 295.443828  | 6.66776E-06 | 0.006052722 |
| 907.799984 | 261.342955  | 5.89815E-06 | 0.005354337 |
| 907.839984 | 240.930125  | 5.43746E-06 | 0.004936341 |
| 907.879984 | 268.113886  | 6.05096E-06 | 0.005493543 |
| 907.919984 | 322.002093  | 7.26714E-06 | 0.00659798  |
| 907.959984 | 382.446178  | 8.63128E-06 | 0.007836855 |
| 907.999984 | 432.746277  | 9.76648E-06 | 0.008867964 |
| 908.039984 | 471.983936  | 1.0652E-05  | 0.00967246  |
| 908.079984 | 547.68197   | 1.23604E-05 | 0.011224249 |

|            |             |             |             |
|------------|-------------|-------------|-------------|
| 908.119984 | 665.871159  | 1.50278E-05 | 0.013647031 |
| 908.159984 | 806.782103  | 1.82079E-05 | 0.01653573  |
| 908.199984 | 885.755689  | 1.99903E-05 | 0.018155165 |
| 908.239984 | 849.316835  | 1.91679E-05 | 0.017409051 |
| 908.279984 | 750.297472  | 1.69332E-05 | 0.015380058 |
| 908.319984 | 696.879411  | 1.57276E-05 | 0.014285691 |
| 908.359984 | 625.52962   | 1.41173E-05 | 0.01282362  |
| 908.399984 | 557.09643   | 1.25729E-05 | 0.011421213 |
| 908.439984 | 494.345956  | 1.11567E-05 | 0.010135192 |
| 908.479984 | 453.643773  | 1.02381E-05 | 0.009301116 |
| 908.519984 | 423.49447   | 9.55768E-06 | 0.008683344 |
| 908.559984 | 400.936449  | 9.04858E-06 | 0.008221175 |
| 908.599984 | 397.19048   | 8.96404E-06 | 0.008144723 |
| 908.639984 | 398.111053  | 8.98481E-06 | 0.008163959 |
| 908.679984 | 392.582044  | 8.86003E-06 | 0.008050932 |
| 908.719984 | 418.732185  | 9.4502E-06  | 0.008587588 |
| 908.759984 | 432.259335  | 9.75549E-06 | 0.0088654   |
| 908.799984 | 426.420304  | 9.62371E-06 | 0.00874603  |
| 908.839984 | 430.251965  | 9.71019E-06 | 0.008825007 |
| 908.879984 | 442.381929  | 9.98394E-06 | 0.009074207 |
| 908.919984 | 443.167869  | 1.00017E-05 | 0.009090728 |
| 908.959984 | 480.362715  | 1.08411E-05 | 0.009854142 |
| 908.999984 | 593.321451  | 1.33904E-05 | 0.012171909 |
| 909.039984 | 789.940055  | 1.78278E-05 | 0.016206226 |
| 909.079984 | 1026.41075  | 2.31647E-05 | 0.02105853  |
| 909.119984 | 1284.47154  | 2.89887E-05 | 0.026354237 |
| 909.159984 | 1493.053363 | 3.36961E-05 | 0.030635177 |
| 909.199984 | 1492.604508 | 3.3686E-05  | 0.030627315 |
| 909.239984 | 1345.669775 | 3.03699E-05 | 0.027613521 |
| 909.279984 | 1164.3473   | 2.62777E-05 | 0.023893784 |
| 909.319984 | 1001.736127 | 2.26078E-05 | 0.020557714 |
| 909.359984 | 819.646628  | 1.84983E-05 | 0.016821598 |
| 909.399984 | 617.525959  | 1.39367E-05 | 0.012674035 |
| 909.439984 | 468.204698  | 1.05667E-05 | 0.009609805 |
| 909.479984 | 388.85347   | 8.77588E-06 | 0.007981488 |
| 909.519984 | 354.93337   | 8.01035E-06 | 0.007285575 |
| 909.559984 | 347.119343  | 7.834E-06   | 0.007125493 |
| 909.599984 | 357.614412  | 8.07086E-06 | 0.007341253 |
| 909.639984 | 378.934871  | 8.55203E-06 | 0.00777927  |
| 909.679984 | 408.910783  | 9.22855E-06 | 0.008395024 |
| 909.719984 | 400.844943  | 9.04651E-06 | 0.008229793 |
| 909.759984 | 364.418796  | 8.22442E-06 | 0.007482252 |
| 909.799984 | 340.964939  | 7.6951E-06  | 0.007001005 |
| 909.839984 | 334.477461  | 7.54869E-06 | 0.0068681   |
| 909.879984 | 344.149794  | 7.76698E-06 | 0.007067021 |
| 909.919984 | 354.432764  | 7.99905E-06 | 0.007278499 |

|            |             |             |             |
|------------|-------------|-------------|-------------|
| 909.959984 | 387.177193  | 8.73805E-06 | 0.007951276 |
| 909.999984 | 450.625967  | 1.017E-05   | 0.0092547   |
| 910.039984 | 538.880864  | 1.21618E-05 | 0.011067716 |
| 910.079984 | 674.651045  | 1.52259E-05 | 0.013856818 |
| 910.119984 | 840.924694  | 1.89785E-05 | 0.017272711 |
| 910.159984 | 999.894545  | 2.25662E-05 | 0.020538877 |
| 910.199984 | 1073.791594 | 2.4234E-05  | 0.022057769 |
| 910.239984 | 1096.713236 | 2.47513E-05 | 0.022529614 |
| 910.279984 | 1002.603389 | 2.26274E-05 | 0.020597235 |
| 910.319984 | 802.225913  | 1.81051E-05 | 0.016481454 |
| 910.359984 | 640.248033  | 1.44495E-05 | 0.013154252 |
| 910.399984 | 521.702538  | 1.17741E-05 | 0.01071914  |
| 910.439984 | 446.531562  | 1.00776E-05 | 0.009175046 |
| 910.479984 | 400.812421  | 9.04578E-06 | 0.008236    |
| 910.519984 | 358.719756  | 8.09581E-06 | 0.007371392 |
| 910.559984 | 321.269729  | 7.25061E-06 | 0.006602116 |
| 910.599984 | 330.028167  | 7.44828E-06 | 0.0067824   |
| 910.639984 | 364.283036  | 8.22136E-06 | 0.0074867   |
| 910.679984 | 408.907136  | 9.22846E-06 | 0.008404178 |
| 910.719984 | 427.051482  | 9.63796E-06 | 0.00877748  |
| 910.759984 | 426.79753   | 9.63223E-06 | 0.008772646 |
| 910.799984 | 416.389022  | 9.39732E-06 | 0.008559079 |
| 910.839984 | 397.381951  | 8.96836E-06 | 0.008168738 |
| 910.879984 | 396.321061  | 8.94441E-06 | 0.008147288 |
| 910.919984 | 435.287647  | 9.82384E-06 | 0.008948728 |
| 910.959984 | 490.866993  | 1.10782E-05 | 0.010091783 |
| 910.999984 | 553.083277  | 1.24823E-05 | 0.011371393 |
| 911.039984 | 719.56731   | 1.62396E-05 | 0.014794954 |
| 911.079984 | 945.040239  | 2.13282E-05 | 0.019431734 |
| 911.119984 | 1161.740383 | 2.62189E-05 | 0.023888529 |
| 911.159984 | 1299.225559 | 2.93217E-05 | 0.02671677  |
| 911.199984 | 1333.029572 | 3.00846E-05 | 0.027413106 |
| 911.239984 | 1202.193245 | 2.71318E-05 | 0.024723606 |
| 911.279984 | 1045.287768 | 2.35907E-05 | 0.021497723 |
| 911.319984 | 851.056158  | 1.92072E-05 | 0.017503862 |
| 911.359984 | 658.581693  | 1.48633E-05 | 0.013545791 |
| 911.399984 | 532.733176  | 1.2023E-05  | 0.010957804 |
| 911.439984 | 427.912369  | 9.65739E-06 | 0.008802128 |
| 911.479984 | 360.244456  | 8.13022E-06 | 0.007410529 |
| 911.519984 | 315.677339  | 7.1244E-06  | 0.006494031 |
| 911.559984 | 301.198052  | 6.79762E-06 | 0.006196439 |
| 911.599984 | 314.461697  | 7.09696E-06 | 0.006469591 |
| 911.639984 | 327.86631   | 7.39949E-06 | 0.006745667 |
| 911.679984 | 329.615078  | 7.43895E-06 | 0.006781945 |
| 911.719984 | 325.259939  | 7.34066E-06 | 0.00669263  |
| 911.759984 | 317.329612  | 7.16169E-06 | 0.00652974  |

|            |             |             |             |
|------------|-------------|-------------|-------------|
| 911.799984 | 326.350719  | 7.36528E-06 | 0.006715663 |
| 911.839984 | 328.568025  | 7.41532E-06 | 0.006761588 |
| 911.879984 | 310.103414  | 6.9986E-06  | 0.006381885 |
| 911.919984 | 302.214497  | 6.82056E-06 | 0.006219805 |
| 911.959984 | 345.718904  | 7.80239E-06 | 0.007115471 |
| 911.999984 | 432.510698  | 9.76116E-06 | 0.008902181 |
| 912.039984 | 531.830102  | 1.20027E-05 | 0.01094691  |
| 912.079984 | 639.859942  | 1.44407E-05 | 0.013171117 |
| 912.119984 | 744.42811   | 1.68007E-05 | 0.015324259 |
| 912.159984 | 854.135002  | 1.92766E-05 | 0.017583377 |
| 912.199984 | 964.636265  | 2.17705E-05 | 0.019859047 |
| 912.239984 | 1005.696313 | 2.26972E-05 | 0.020705261 |
| 912.279984 | 943.480124  | 2.1293E-05  | 0.019425207 |
| 912.319984 | 788.870368  | 1.78037E-05 | 0.016242676 |
| 912.359984 | 605.355104  | 1.3662E-05  | 0.012464682 |
| 912.399984 | 464.379464  | 1.04804E-05 | 0.009562315 |
| 912.439984 | 389.855077  | 8.79849E-06 | 0.00802809  |
| 912.479984 | 353.348051  | 7.97457E-06 | 0.007276639 |
| 912.519984 | 313.51756   | 7.07565E-06 | 0.006456676 |
| 912.559984 | 304.823332  | 6.87944E-06 | 0.0062779   |
| 912.599984 | 331.991242  | 7.49258E-06 | 0.006837728 |
| 912.639984 | 375.011842  | 8.46349E-06 | 0.007724124 |
| 912.679984 | 415.47827   | 9.37677E-06 | 0.008557986 |
| 912.719984 | 445.100218  | 1.00453E-05 | 0.009168539 |
| 912.759984 | 473.206508  | 1.06796E-05 | 0.009747922 |
| 912.799984 | 456.433164  | 1.03011E-05 | 0.009402808 |
| 912.839984 | 433.27478   | 9.77841E-06 | 0.008926122 |
| 912.879984 | 422.747835  | 9.54083E-06 | 0.008709633 |
| 912.919984 | 420.635128  | 9.49315E-06 | 0.008666485 |
| 912.959984 | 434.553305  | 9.80726E-06 | 0.008953638 |
| 912.999984 | 496.286872  | 1.12005E-05 | 0.010226059 |
| 913.039984 | 588.997947  | 1.32929E-05 | 0.012136916 |
| 913.079984 | 726.361688  | 1.6393E-05  | 0.014968094 |
| 913.119984 | 872.104694  | 1.96822E-05 | 0.017972199 |
| 913.159984 | 1000.876826 | 2.25884E-05 | 0.020626819 |
| 913.199984 | 1050.809573 | 2.37153E-05 | 0.021656819 |
| 913.239984 | 1074.910863 | 2.42592E-05 | 0.022154509 |
| 913.279984 | 1022.941221 | 2.30864E-05 | 0.021084309 |
| 913.319984 | 874.536613  | 1.97371E-05 | 0.018026263 |
| 913.359984 | 697.833449  | 1.57491E-05 | 0.014384624 |
| 913.399984 | 533.837064  | 1.2048E-05  | 0.011004606 |
| 913.439984 | 412.639946  | 9.31271E-06 | 0.008506601 |
| 913.479984 | 348.989409  | 7.8762E-06  | 0.007194755 |
| 913.519984 | 335.595987  | 7.57393E-06 | 0.00691894  |
| 913.559984 | 325.723689  | 7.35113E-06 | 0.006715698 |
| 913.599984 | 339.710851  | 7.6668E-06  | 0.007004389 |



|            |            |             |             |
|------------|------------|-------------|-------------|
| 913.639984 | 347.697137 | 7.84704E-06 | 0.00716937  |
| 913.679984 | 358.571362 | 8.09246E-06 | 0.007393915 |
| 913.719984 | 367.855468 | 8.30199E-06 | 0.00758569  |
| 913.759984 | 370.906086 | 8.37083E-06 | 0.007648933 |
| 913.799984 | 355.478218 | 8.02265E-06 | 0.007331096 |
| 913.839984 | 331.543023 | 7.48246E-06 | 0.006837775 |
| 913.879984 | 295.609203 | 6.67149E-06 | 0.006096939 |
| 913.919984 | 283.894373 | 6.4071E-06  | 0.005855577 |
| 913.959984 | 306.598966 | 6.91951E-06 | 0.006324157 |
| 913.999984 | 377.541623 | 8.52059E-06 | 0.007787818 |
| 914.039984 | 480.230792 | 1.08381E-05 | 0.009906493 |
| 914.079984 | 569.364846 | 1.28498E-05 | 0.011745719 |
| 914.119984 | 651.778192 | 1.47097E-05 | 0.013446454 |
| 914.159984 | 738.742958 | 1.66724E-05 | 0.015241241 |
| 914.199984 | 799.162876 | 1.8036E-05  | 0.016488504 |
| 914.239984 | 837.851295 | 1.89091E-05 | 0.017287489 |
| 914.279984 | 788.154541 | 1.77876E-05 | 0.016262801 |
| 914.319984 | 649.778407 | 1.46646E-05 | 0.013408131 |
| 914.359984 | 534.783153 | 1.20693E-05 | 0.011035695 |
| 914.399984 | 485.417165 | 1.09552E-05 | 0.010017425 |
| 914.439984 | 411.605478 | 9.28936E-06 | 0.008494564 |
| 914.479984 | 380.394324 | 8.58497E-06 | 0.007850783 |
| 914.519984 | 392.940219 | 8.86811E-06 | 0.008110067 |
| 914.559984 | 410.717622 | 9.26932E-06 | 0.008477353 |
| 914.599984 | 387.268582 | 8.74011E-06 | 0.007993707 |
| 914.639984 | 373.942442 | 8.43936E-06 | 0.007718976 |
| 914.679984 | 351.422282 | 7.93111E-06 | 0.007254429 |
| 914.719984 | 359.299452 | 8.10889E-06 | 0.007417362 |
| 914.759984 | 368.5857   | 8.31847E-06 | 0.0076094   |
| 914.799984 | 345.93101  | 7.80718E-06 | 0.007142009 |
| 914.839984 | 320.676603 | 7.23722E-06 | 0.006620902 |
| 914.879984 | 326.320163 | 7.36459E-06 | 0.006737717 |
| 914.919984 | 362.639899 | 8.18428E-06 | 0.007487959 |
| 914.959984 | 384.651833 | 8.68106E-06 | 0.007942819 |
| 914.999984 | 445.620879 | 1.0057E-05  | 0.009202194 |
| 915.039984 | 541.508838 | 1.22211E-05 | 0.011182795 |
| 915.079984 | 671.934543 | 1.51646E-05 | 0.013876846 |
| 915.119984 | 789.814316 | 1.7825E-05  | 0.016312022 |
| 915.159984 | 855.516211 | 1.93078E-05 | 0.017669734 |
| 915.199984 | 922.522825 | 2.08201E-05 | 0.019054514 |
| 915.239984 | 934.44383  | 2.10891E-05 | 0.019301584 |
| 915.279984 | 855.991934 | 1.93185E-05 | 0.017681878 |
| 915.319984 | 748.974812 | 1.69033E-05 | 0.015471945 |
| 915.359984 | 637.422125 | 1.43857E-05 | 0.013168121 |
| 915.399984 | 527.763231 | 1.19109E-05 | 0.01090322  |
| 915.439984 | 418.404099 | 9.4428E-06  | 0.008644315 |

|            |            |             |             |
|------------|------------|-------------|-------------|
| 915.479984 | 346.340454 | 7.81642E-06 | 0.007155778 |
| 915.519984 | 328.382144 | 7.41113E-06 | 0.006785035 |
| 915.559984 | 335.120984 | 7.56321E-06 | 0.006924576 |
| 915.599984 | 355.059245 | 8.01319E-06 | 0.007336879 |
| 915.639984 | 344.842831 | 7.78262E-06 | 0.00712608  |
| 915.679984 | 306.672039 | 6.92116E-06 | 0.006337568 |
| 915.719984 | 304.879338 | 6.8807E-06  | 0.006300796 |
| 915.759984 | 311.173189 | 7.02275E-06 | 0.006431149 |
| 915.799984 | 294.700108 | 6.65097E-06 | 0.006090959 |
| 915.839984 | 288.194666 | 6.50415E-06 | 0.005956763 |
| 915.879984 | 279.178095 | 6.30066E-06 | 0.005770649 |
| 915.919984 | 271.019677 | 6.11654E-06 | 0.005602258 |
| 915.959984 | 305.343829 | 6.89118E-06 | 0.00631205  |
| 915.999984 | 348.094827 | 7.85602E-06 | 0.00719611  |
| 916.039984 | 396.274163 | 8.94336E-06 | 0.008192472 |
| 916.079984 | 468.356187 | 1.05701E-05 | 0.0096831   |
| 916.119984 | 581.242996 | 1.31178E-05 | 0.01201752  |
| 916.159984 | 699.303421 | 1.57823E-05 | 0.014459116 |
| 916.199984 | 769.468935 | 1.73658E-05 | 0.015910584 |
| 916.239984 | 764.244859 | 1.72479E-05 | 0.015803254 |
| 916.279984 | 702.74489  | 1.586E-05   | 0.014532176 |
| 916.319984 | 627.047892 | 1.41516E-05 | 0.012967392 |
| 916.359984 | 562.590954 | 1.26969E-05 | 0.011634926 |
| 916.399984 | 486.057997 | 1.09697E-05 | 0.010052589 |
| 916.439984 | 449.160817 | 1.01369E-05 | 0.009289892 |
| 916.479984 | 444.601525 | 1.0034E-05  | 0.009195994 |
| 916.519984 | 472.947208 | 1.06738E-05 | 0.009782714 |
| 916.559984 | 525.299706 | 1.18553E-05 | 0.010866078 |
| 916.599984 | 530.531978 | 1.19734E-05 | 0.010974789 |
| 916.639984 | 499.551662 | 1.12742E-05 | 0.010334369 |
| 916.679984 | 444.429434 | 1.00302E-05 | 0.009194441 |
| 916.719984 | 378.401533 | 8.54E-06    | 0.007828785 |
| 916.759984 | 359.351953 | 8.11007E-06 | 0.00743499  |
| 916.799984 | 368.989551 | 8.32758E-06 | 0.007634725 |
| 916.839984 | 354.877624 | 8.00909E-06 | 0.007343057 |
| 916.879984 | 333.591574 | 7.5287E-06  | 0.006902912 |
| 916.919984 | 345.388524 | 7.79494E-06 | 0.007147334 |
| 916.959984 | 385.802891 | 8.70703E-06 | 0.007984002 |
| 916.999984 | 428.341888 | 9.66708E-06 | 0.008864712 |
| 917.039984 | 506.872104 | 1.14394E-05 | 0.010490385 |
| 917.079984 | 624.353858 | 1.40908E-05 | 0.012922388 |
| 917.119984 | 723.099369 | 1.63193E-05 | 0.014966798 |
| 917.159984 | 839.157693 | 1.89386E-05 | 0.017369745 |
| 917.199984 | 970.158382 | 2.18951E-05 | 0.020082207 |
| 917.239984 | 1028.14281 | 2.32038E-05 | 0.021283408 |
| 917.279984 | 947.741149 | 2.13892E-05 | 0.019619883 |

|            |            |             |             |
|------------|------------|-------------|-------------|
| 917.319984 | 788.749826 | 1.7801E-05  | 0.016329199 |
| 917.359984 | 650.147428 | 1.46729E-05 | 0.013460351 |
| 917.399984 | 564.224074 | 1.27338E-05 | 0.011681943 |
| 917.439984 | 484.022713 | 1.09237E-05 | 0.010021856 |
| 917.479984 | 443.007636 | 9.99807E-06 | 0.009173025 |
| 917.519984 | 428.319751 | 9.66658E-06 | 0.00886928  |
| 917.559984 | 413.051915 | 9.32201E-06 | 0.0085535   |
| 917.599984 | 392.493393 | 8.85803E-06 | 0.008128127 |
| 917.639984 | 401.421681 | 9.05953E-06 | 0.008313385 |
| 917.679984 | 395.877293 | 8.9344E-06  | 0.008198919 |
| 917.719984 | 358.379692 | 8.08813E-06 | 0.007422639 |
| 917.759984 | 325.026642 | 7.3354E-06  | 0.006732135 |
| 917.799984 | 308.389943 | 6.95993E-06 | 0.006387825 |
| 917.839984 | 304.509476 | 6.87235E-06 | 0.006307722 |
| 917.879984 | 298.327057 | 6.73283E-06 | 0.006179926 |
| 917.919984 | 284.910309 | 6.43003E-06 | 0.005902252 |
| 917.959984 | 302.208038 | 6.82041E-06 | 0.006260868 |
| 917.999984 | 338.992568 | 7.65059E-06 | 0.007023242 |
| 918.039984 | 388.610414 | 8.7704E-06  | 0.008051574 |
| 918.079984 | 453.080379 | 1.02254E-05 | 0.009387729 |
| 918.119984 | 542.245994 | 1.22377E-05 | 0.011235711 |
| 918.159984 | 646.278228 | 1.45856E-05 | 0.013391914 |
| 918.199984 | 730.92527  | 1.6496E-05  | 0.015146595 |
| 918.239984 | 769.958112 | 1.73769E-05 | 0.015956148 |
| 918.279984 | 742.825357 | 1.67645E-05 | 0.015394536 |
| 918.319984 | 657.956807 | 1.48492E-05 | 0.013636288 |
| 918.359984 | 541.706071 | 1.22256E-05 | 0.011227457 |
| 918.399984 | 463.145039 | 1.04525E-05 | 0.009599611 |
| 918.439984 | 412.362742 | 9.30645E-06 | 0.008547418 |
| 918.479984 | 367.280511 | 8.28901E-06 | 0.007613289 |
| 918.519984 | 332.974227 | 7.51476E-06 | 0.006902461 |
| 918.559984 | 306.558711 | 6.9186E-06  | 0.006355152 |
| 918.599984 | 308.603673 | 6.96476E-06 | 0.006397824 |
| 918.639984 | 335.373747 | 7.56892E-06 | 0.006953111 |
| 918.679984 | 357.443544 | 8.067E-06   | 0.007410994 |
| 918.719984 | 392.3506   | 8.85481E-06 | 0.008135088 |
| 918.759984 | 386.887083 | 8.7315E-06  | 0.008022155 |
| 918.799984 | 337.144017 | 7.60887E-06 | 0.00699103  |
| 918.839984 | 303.730812 | 6.85478E-06 | 0.006298447 |
| 918.879984 | 308.652316 | 6.96585E-06 | 0.006400783 |
| 918.919984 | 322.622878 | 7.28115E-06 | 0.006690793 |
| 918.959984 | 338.970631 | 7.65009E-06 | 0.007030131 |
| 918.999984 | 384.979884 | 8.68846E-06 | 0.007984694 |
| 919.039984 | 457.890601 | 1.0334E-05  | 0.009497316 |
| 919.079984 | 603.368785 | 1.36172E-05 | 0.01251529  |
| 919.119984 | 759.559504 | 1.71422E-05 | 0.015755739 |

|            |            |             |             |
|------------|------------|-------------|-------------|
| 919.159984 | 867.239293 | 1.95724E-05 | 0.017990151 |
| 919.199984 | 936.510869 | 2.11357E-05 | 0.019427977 |
| 919.239984 | 968.900936 | 2.18667E-05 | 0.020100786 |
| 919.279984 | 925.704458 | 2.08919E-05 | 0.019205469 |
| 919.319984 | 802.976617 | 1.81221E-05 | 0.016659975 |
| 919.359984 | 638.155689 | 1.44023E-05 | 0.013240885 |
| 919.399984 | 510.051885 | 1.15112E-05 | 0.010583361 |
| 919.439984 | 415.97097  | 9.38789E-06 | 0.008631597 |
| 919.479984 | 348.498954 | 7.86514E-06 | 0.007231835 |
| 919.519984 | 327.555772 | 7.39248E-06 | 0.006797531 |
| 919.559984 | 318.059565 | 7.17816E-06 | 0.00660075  |
| 919.599984 | 330.227061 | 7.45276E-06 | 0.006853562 |
| 919.639984 | 339.271823 | 7.65689E-06 | 0.007041584 |
| 919.679984 | 332.517919 | 7.50447E-06 | 0.006901707 |
| 919.719984 | 338.167337 | 7.63197E-06 | 0.007019271 |
| 919.759984 | 341.875646 | 7.71566E-06 | 0.007096553 |
| 919.799984 | 325.831994 | 7.35357E-06 | 0.006763817 |
| 919.839984 | 307.941328 | 6.94981E-06 | 0.00639271  |
| 919.879984 | 296.22271  | 6.68533E-06 | 0.006149705 |
| 919.919984 | 282.604014 | 6.37798E-06 | 0.00586723  |
| 919.959984 | 277.21847  | 6.25643E-06 | 0.00575567  |
| 919.999984 | 307.503732 | 6.93993E-06 | 0.006384736 |
| 920.039984 | 401.436456 | 9.05986E-06 | 0.008335435 |
| 920.079984 | 550.3867   | 1.24215E-05 | 0.011428738 |
| 920.119984 | 685.941522 | 1.54807E-05 | 0.014244143 |
| 920.159984 | 811.864642 | 1.83227E-05 | 0.016859773 |
| 920.199984 | 906.516226 | 2.04588E-05 | 0.018826195 |
| 920.239984 | 930.92887  | 2.10098E-05 | 0.019334028 |
| 920.279984 | 858.543055 | 1.93761E-05 | 0.017831456 |
| 920.319984 | 751.250702 | 1.69547E-05 | 0.015603733 |
| 920.359984 | 646.880722 | 1.45992E-05 | 0.013436517 |
| 920.399984 | 542.804134 | 1.22503E-05 | 0.011275207 |
| 920.439984 | 449.857298 | 1.01527E-05 | 0.009344907 |
| 920.479984 | 366.892212 | 8.28025E-06 | 0.007621801 |
| 920.519984 | 308.98605  | 6.97338E-06 | 0.00641914  |
| 920.559984 | 313.637379 | 7.07836E-06 | 0.006516054 |
| 920.599984 | 370.857338 | 8.36973E-06 | 0.007705177 |
| 920.639984 | 420.678966 | 9.49414E-06 | 0.008740683 |
| 920.679984 | 439.852585 | 9.92686E-06 | 0.009139461 |
| 920.719984 | 474.715536 | 1.07137E-05 | 0.009864289 |
| 920.759984 | 483.868162 | 1.09202E-05 | 0.010054911 |
| 920.799984 | 439.551643 | 9.92007E-06 | 0.009134399 |
| 920.839984 | 383.80034  | 8.66184E-06 | 0.007976168 |
| 920.879984 | 355.16381  | 8.01555E-06 | 0.007381362 |
| 920.919984 | 349.967511 | 7.89828E-06 | 0.007273683 |
| 920.959984 | 385.890983 | 8.70902E-06 | 0.008020661 |

|            |             |             |             |
|------------|-------------|-------------|-------------|
| 920.999984 | 464.910685  | 1.04924E-05 | 0.009663488 |
| 921.039984 | 593.975227  | 1.34052E-05 | 0.012346719 |
| 921.079984 | 754.293732  | 1.70234E-05 | 0.015679875 |
| 921.119984 | 894.38273   | 2.0185E-05  | 0.018592781 |
| 921.159984 | 997.915891  | 2.25216E-05 | 0.020745971 |
| 921.199984 | 1064.17411  | 2.40169E-05 | 0.022124393 |
| 921.239984 | 1111.858524 | 2.50931E-05 | 0.023116765 |
| 921.279984 | 1117.477283 | 2.52199E-05 | 0.023234594 |
| 921.319984 | 1013.874783 | 2.28817E-05 | 0.021081406 |
| 921.359984 | 874.983541  | 1.97472E-05 | 0.018194243 |
| 921.399984 | 742.012892  | 1.67462E-05 | 0.015429946 |
| 921.439984 | 669.594109  | 1.51118E-05 | 0.013924623 |
| 921.479984 | 642.726778  | 1.45054E-05 | 0.01336648  |
| 921.519984 | 659.507918  | 1.48842E-05 | 0.013716065 |
| 921.559984 | 630.257135  | 1.4224E-05  | 0.013108293 |
| 921.599984 | 558.175676  | 1.25972E-05 | 0.011609623 |
| 921.639984 | 496.188177  | 1.11983E-05 | 0.010320779 |
| 921.679984 | 471.679533  | 1.06452E-05 | 0.009811422 |
| 921.719984 | 462.019398  | 1.04271E-05 | 0.009610898 |
| 921.759984 | 448.960523  | 1.01324E-05 | 0.009339653 |
| 921.799984 | 394.956417  | 8.91362E-06 | 0.008216571 |
| 921.839984 | 342.554354  | 7.73097E-06 | 0.007126722 |
| 921.879984 | 321.037011  | 7.24536E-06 | 0.006679351 |
| 921.919984 | 322.224977  | 7.27217E-06 | 0.006704358 |
| 921.959984 | 342.309123  | 7.72544E-06 | 0.007122547 |
| 921.999984 | 411.083579  | 9.27758E-06 | 0.008553932 |
| 922.039984 | 472.478772  | 1.06632E-05 | 0.009831885 |
| 922.079984 | 557.011094  | 1.2571E-05  | 0.011591435 |
| 922.119984 | 665.550277  | 1.50205E-05 | 0.013850743 |
| 922.159984 | 805.871057  | 1.81874E-05 | 0.016771681 |
| 922.199984 | 934.04791   | 2.10802E-05 | 0.019440123 |
| 922.239984 | 935.101017  | 2.11039E-05 | 0.019462886 |
| 922.279984 | 868.568829  | 1.96024E-05 | 0.018078891 |
| 922.319984 | 759.698063  | 1.71453E-05 | 0.015813478 |
| 922.359984 | 630.648369  | 1.42329E-05 | 0.013127816 |
| 922.399984 | 535.387432  | 1.20829E-05 | 0.011145312 |
| 922.439984 | 508.285923  | 1.14713E-05 | 0.010581591 |
| 922.479984 | 499.415453  | 1.12711E-05 | 0.010397374 |
| 922.519984 | 511.327486  | 1.15399E-05 | 0.010645834 |
| 922.559984 | 526.709948  | 1.18871E-05 | 0.010966572 |
| 922.599984 | 525.830053  | 1.18673E-05 | 0.010948726 |
| 922.639984 | 491.074808  | 1.10829E-05 | 0.010225503 |
| 922.679984 | 447.979768  | 1.01103E-05 | 0.009328552 |
| 922.719984 | 409.689421  | 9.24612E-06 | 0.008531579 |
| 922.759984 | 411.357373  | 9.28376E-06 | 0.008566685 |
| 922.799984 | 397.178508  | 8.96377E-06 | 0.008271763 |

|            |             |             |             |
|------------|-------------|-------------|-------------|
| 922.839984 | 367.021733  | 8.28317E-06 | 0.00764404  |
| 922.879984 | 379.309808  | 8.56049E-06 | 0.007900309 |
| 922.919984 | 462.76373   | 1.04439E-05 | 0.009638914 |
| 922.959984 | 603.981466  | 1.3631E-05  | 0.012580886 |
| 922.999984 | 784.026711  | 1.76944E-05 | 0.016331922 |
| 923.039984 | 1092.373078 | 2.46533E-05 | 0.022756017 |
| 923.079984 | 1495.662248 | 3.3755E-05  | 0.031158577 |
| 923.119984 | 1797.450522 | 4.0566E-05  | 0.037447243 |
| 923.159984 | 1941.817024 | 4.38241E-05 | 0.040456661 |
| 923.199984 | 1833.62427  | 4.13823E-05 | 0.038204181 |
| 923.239984 | 1581.882366 | 3.57009E-05 | 0.032960481 |
| 923.279984 | 1348.074548 | 3.04242E-05 | 0.028090022 |
| 923.319984 | 1099.364765 | 2.48111E-05 | 0.022908614 |
| 923.359984 | 809.860611  | 1.82774E-05 | 0.016876644 |
| 923.399984 | 599.472415  | 1.35293E-05 | 0.012492916 |
| 923.439984 | 486.472321  | 1.0979E-05  | 0.01013845  |
| 923.479984 | 438.638963  | 9.89947E-06 | 0.009141963 |
| 923.519984 | 423.536686  | 9.55863E-06 | 0.008827589 |
| 923.559984 | 436.66203   | 9.85485E-06 | 0.009101549 |
| 923.599984 | 423.071783  | 9.54814E-06 | 0.008818663 |
| 923.639984 | 397.492466  | 8.97085E-06 | 0.008285837 |
| 923.679984 | 382.099212  | 8.62345E-06 | 0.007965305 |
| 923.719984 | 377.755618  | 8.52542E-06 | 0.007875099 |
| 923.759984 | 379.497802  | 8.56474E-06 | 0.007911761 |
| 923.799984 | 379.159285  | 8.5571E-06  | 0.007905046 |
| 923.839984 | 401.749007  | 9.06692E-06 | 0.008376379 |
| 923.879984 | 409.849952  | 9.24974E-06 | 0.008545652 |
| 923.919984 | 416.623051  | 9.4026E-06  | 0.008687252 |
| 923.959984 | 507.985216  | 1.14645E-05 | 0.010592757 |
| 923.999984 | 759.978971  | 1.71517E-05 | 0.01584814  |
| 924.039984 | 1182.951753 | 2.66976E-05 | 0.024669625 |
| 924.079984 | 1675.972263 | 3.78244E-05 | 0.034952734 |
| 924.119984 | 2155.312239 | 4.86424E-05 | 0.044951409 |
| 924.159984 | 2492.904947 | 5.62614E-05 | 0.051994527 |
| 924.199984 | 2431.164218 | 5.4868E-05  | 0.050708996 |
| 924.239984 | 2064.893673 | 4.66018E-05 | 0.043071223 |
| 924.279984 | 1636.646727 | 3.69368E-05 | 0.034139979 |
| 924.319984 | 1218.052493 | 2.74897E-05 | 0.025409324 |
| 924.359984 | 903.281286  | 2.03858E-05 | 0.018843818 |
| 924.399984 | 681.566548  | 1.5382E-05  | 0.014219128 |
| 924.439984 | 519.772253  | 1.17305E-05 | 0.010844176 |
| 924.479984 | 425.301793  | 9.59847E-06 | 0.008873593 |
| 924.519984 | 416.895263  | 9.40875E-06 | 0.008698573 |
| 924.559984 | 457.811875  | 1.03322E-05 | 0.009552717 |
| 924.599984 | 459.914381  | 1.03796E-05 | 0.009597003 |
| 924.639984 | 445.574153  | 1.0056E-05  | 0.009298169 |

|            |             |             |             |
|------------|-------------|-------------|-------------|
| 924.679984 | 470.631968  | 1.06215E-05 | 0.009821496 |
| 924.719984 | 529.290491  | 1.19453E-05 | 0.011046103 |
| 924.759984 | 544.905861  | 1.22978E-05 | 0.011372482 |
| 924.799984 | 542.806932  | 1.22504E-05 | 0.011329166 |
| 924.839984 | 552.123143  | 1.24607E-05 | 0.011524108 |
| 924.879984 | 566.8648    | 1.27933E-05 | 0.011832312 |
| 924.919984 | 602.790861  | 1.36042E-05 | 0.01258275  |
| 924.959984 | 705.735569  | 1.59275E-05 | 0.014732271 |
| 924.999984 | 923.303071  | 2.08377E-05 | 0.019274839 |
| 925.039984 | 1286.845342 | 2.90423E-05 | 0.026865295 |
| 925.079984 | 1760.755045 | 3.97378E-05 | 0.036760633 |
| 925.119984 | 2255.04304  | 5.08932E-05 | 0.047082298 |
| 925.159984 | 2555.469474 | 5.76734E-05 | 0.053357109 |
| 925.199984 | 2585.363254 | 5.8348E-05  | 0.053983613 |
| 925.239984 | 2274.394176 | 5.13299E-05 | 0.047492484 |
| 925.279984 | 1739.068004 | 3.92483E-05 | 0.036315706 |
| 925.319984 | 1266.742999 | 2.85886E-05 | 0.026453626 |
| 925.359984 | 904.185893  | 2.04062E-05 | 0.018883096 |
| 925.399984 | 673.624446  | 1.52028E-05 | 0.014068639 |
| 925.439984 | 528.242712  | 1.19217E-05 | 0.01103282  |
| 925.479984 | 388.246471  | 8.76218E-06 | 0.008109224 |
| 925.519984 | 310.44457   | 7.0063E-06  | 0.006484472 |
| 925.559984 | 301.820886  | 6.81168E-06 | 0.006304616 |
| 925.599984 | 339.711212  | 7.66681E-06 | 0.007096398 |
| 925.639984 | 379.163874  | 8.5572E-06  | 0.007920887 |
| 925.679984 | 404.007538  | 9.11789E-06 | 0.008440246 |
| 925.719984 | 419.603616  | 9.46987E-06 | 0.008766447 |
| 925.759984 | 399.479954  | 9.01571E-06 | 0.00834638  |
| 925.799984 | 375.611691  | 8.47703E-06 | 0.007848037 |
| 925.839984 | 355.712497  | 8.02794E-06 | 0.007432584 |
| 925.879984 | 360.810869  | 8.143E-06   | 0.00753944  |
| 925.919984 | 390.596023  | 8.81521E-06 | 0.008162177 |
| 925.959984 | 413.01225   | 9.32111E-06 | 0.008630976 |
| 925.999984 | 490.486529  | 1.10696E-05 | 0.010250447 |
| 926.039984 | 669.573999  | 1.51114E-05 | 0.013993717 |
| 926.079984 | 903.543935  | 2.03917E-05 | 0.018884371 |
| 926.119984 | 1167.31844  | 2.63448E-05 | 0.024398401 |
| 926.159984 | 1337.441327 | 3.01842E-05 | 0.027955387 |
| 926.199984 | 1341.168237 | 3.02683E-05 | 0.028034498 |
| 926.239984 | 1242.915383 | 2.80509E-05 | 0.025981836 |
| 926.279984 | 1116.485352 | 2.51975E-05 | 0.023339958 |
| 926.319984 | 964.375757  | 2.17646E-05 | 0.020161    |
| 926.359984 | 751.692903  | 1.69647E-05 | 0.015715384 |
| 926.399984 | 558.401465  | 1.26023E-05 | 0.011674811 |
| 926.439984 | 444.457882  | 1.00308E-05 | 0.00929293  |
| 926.479984 | 398.263499  | 8.98825E-06 | 0.008327436 |

|            |             |             |             |
|------------|-------------|-------------|-------------|
| 926.519984 | 398.146706  | 8.98562E-06 | 0.008325353 |
| 926.559984 | 409.550288  | 9.24298E-06 | 0.008564175 |
| 926.599984 | 431.073395  | 9.72873E-06 | 0.009014637 |
| 926.639984 | 465.410201  | 1.05037E-05 | 0.009733111 |
| 926.679984 | 471.640714  | 1.06443E-05 | 0.009863836 |
| 926.719984 | 482.069338  | 1.08796E-05 | 0.010082374 |
| 926.759984 | 520.473531  | 1.17464E-05 | 0.010886059 |
| 926.799984 | 521.921221  | 1.1779E-05  | 0.010916809 |
| 926.839984 | 512.505386  | 1.15665E-05 | 0.010720325 |
| 926.879984 | 521.736222  | 1.17749E-05 | 0.010913882 |
| 926.919984 | 538.607565  | 1.21556E-05 | 0.011267289 |
| 926.959984 | 581.41797   | 1.31218E-05 | 0.012163378 |
| 926.999984 | 688.679569  | 1.55425E-05 | 0.014407933 |
| 927.039984 | 907.749411  | 2.04866E-05 | 0.018991934 |
| 927.079984 | 1142.377138 | 2.57819E-05 | 0.023901847 |
| 927.119984 | 1324.613134 | 2.98947E-05 | 0.027715949 |
| 927.159984 | 1463.46863  | 3.30284E-05 | 0.030622656 |
| 927.199984 | 1494.097787 | 3.37197E-05 | 0.031264911 |
| 927.239984 | 1366.483275 | 3.08396E-05 | 0.028595733 |
| 927.279984 | 1204.624757 | 2.71867E-05 | 0.025209685 |
| 927.319984 | 1030.747854 | 2.32625E-05 | 0.021571821 |
| 927.359984 | 845.746587  | 1.90873E-05 | 0.017700819 |
| 927.399984 | 658.019633  | 1.48506E-05 | 0.013772434 |
| 927.439984 | 514.800107  | 1.16183E-05 | 0.010775296 |
| 927.479984 | 445.978462  | 1.00651E-05 | 0.009335191 |
| 927.519984 | 407.751359  | 9.20238E-06 | 0.008535392 |
| 927.559984 | 403.334131  | 9.10269E-06 | 0.008443291 |
| 927.599984 | 391.784373  | 8.84203E-06 | 0.008201865 |
| 927.639984 | 390.043577  | 8.80274E-06 | 0.008165774 |
| 927.679984 | 412.696504  | 9.31399E-06 | 0.008640398 |
| 927.719984 | 400.888516  | 9.0475E-06  | 0.008393542 |
| 927.759984 | 380.891498  | 8.59619E-06 | 0.007975202 |
| 927.799984 | 392.679192  | 8.86222E-06 | 0.00822237  |
| 927.839984 | 399.500184  | 9.01616E-06 | 0.008365556 |
| 927.879984 | 387.207238  | 8.73873E-06 | 0.008108491 |
| 927.919984 | 404.572598  | 9.13064E-06 | 0.008472503 |
| 927.959984 | 415.934828  | 9.38707E-06 | 0.008710825 |
| 927.999984 | 464.215697  | 1.04767E-05 | 0.009722379 |
| 928.039984 | 567.260365  | 1.28023E-05 | 0.011881024 |
| 928.079984 | 670.884089  | 1.51409E-05 | 0.014051984 |
| 928.119984 | 817.338852  | 1.84462E-05 | 0.017120286 |
| 928.159984 | 964.401382  | 2.17652E-05 | 0.020201584 |
| 928.199984 | 1003.458898 | 2.26467E-05 | 0.021020638 |
| 928.239984 | 954.106229  | 2.15328E-05 | 0.019987651 |
| 928.279984 | 877.922824  | 1.98135E-05 | 0.018392471 |
| 928.319984 | 789.545025  | 1.78189E-05 | 0.01654167  |



|            |             |             |             |
|------------|-------------|-------------|-------------|
| 928.359984 | 651.458561  | 1.47025E-05 | 0.013649224 |
| 928.399984 | 536.356493  | 1.21048E-05 | 0.011238114 |
| 928.439984 | 455.491775  | 1.02798E-05 | 0.009544191 |
| 928.479984 | 404.853953  | 9.13699E-06 | 0.008483512 |
| 928.519984 | 374.511126  | 8.45219E-06 | 0.007848031 |
| 928.559984 | 381.626018  | 8.61277E-06 | 0.007997471 |
| 928.599984 | 398.549893  | 8.99472E-06 | 0.008352493 |
| 928.639984 | 435.298332  | 9.82408E-06 | 0.009123031 |
| 928.679984 | 502.681455  | 1.13448E-05 | 0.010535707 |
| 928.719984 | 541.052553  | 1.22108E-05 | 0.011340416 |
| 928.759984 | 533.335153  | 1.20366E-05 | 0.011179142 |
| 928.799984 | 508.824648  | 1.14835E-05 | 0.010665841 |
| 928.839984 | 453.936091  | 1.02447E-05 | 0.009515692 |
| 928.879984 | 407.693781  | 9.20108E-06 | 0.0085467   |
| 928.919984 | 400.641758  | 9.04193E-06 | 0.008399226 |
| 928.959984 | 447.015849  | 1.00885E-05 | 0.009371836 |
| 928.999984 | 530.235891  | 1.19667E-05 | 0.011117051 |
| 929.039984 | 635.632504  | 1.43453E-05 | 0.013327395 |
| 929.079984 | 745.3705    | 1.6822E-05  | 0.015628959 |
| 929.119984 | 863.783007  | 1.94944E-05 | 0.018112617 |
| 929.159984 | 993.440193  | 2.24206E-05 | 0.020832288 |
| 929.199984 | 1078.180781 | 2.4333E-05  | 0.022610259 |
| 929.239984 | 1082.702001 | 2.44351E-05 | 0.02270605  |
| 929.279984 | 1019.915186 | 2.30181E-05 | 0.021390227 |
| 929.319984 | 863.197145  | 1.94812E-05 | 0.018104229 |
| 929.359984 | 724.827054  | 1.63583E-05 | 0.015202784 |
| 929.399984 | 580.411601  | 1.30991E-05 | 0.012174286 |
| 929.439984 | 461.826999  | 1.04228E-05 | 0.00968736  |
| 929.479984 | 439.504733  | 9.91901E-06 | 0.009219521 |
| 929.519984 | 410.234871  | 9.25843E-06 | 0.008605895 |
| 929.559984 | 370.272971  | 8.35655E-06 | 0.00776791  |
| 929.599984 | 351.72717   | 7.93799E-06 | 0.007379158 |
| 929.639984 | 356.769169  | 8.05178E-06 | 0.00748526  |
| 929.679984 | 357.123034  | 8.05977E-06 | 0.007493006 |
| 929.719984 | 349.405519  | 7.8856E-06  | 0.007331396 |
| 929.759984 | 350.069414  | 7.90058E-06 | 0.007345642 |
| 929.799984 | 339.739085  | 7.66744E-06 | 0.007129184 |
| 929.839984 | 322.953909  | 7.28862E-06 | 0.00677725  |
| 929.879984 | 337.281013  | 7.61196E-06 | 0.007078212 |
| 929.919984 | 364.474686  | 8.22569E-06 | 0.00764923  |
| 929.959984 | 364.998168  | 8.2375E-06  | 0.007660546 |
| 929.999984 | 387.888531  | 8.7541E-06  | 0.008141316 |
| 930.039984 | 441.661091  | 9.96768E-06 | 0.009270337 |
| 930.079984 | 552.624003  | 1.2472E-05  | 0.011599915 |
| 930.119984 | 640.187994  | 1.44482E-05 | 0.013438514 |
| 930.159984 | 682.243043  | 1.53973E-05 | 0.014321929 |

|            |            |             |             |
|------------|------------|-------------|-------------|
| 930.199984 | 728.300042 | 1.64367E-05 | 0.015289434 |
| 930.239984 | 757.794347 | 1.71024E-05 | 0.015909302 |
| 930.279984 | 742.931871 | 1.67669E-05 | 0.015597946 |
| 930.319984 | 702.117455 | 1.58458E-05 | 0.014741676 |
| 930.359984 | 600.394162 | 1.35501E-05 | 0.012606434 |
| 930.399984 | 487.10683  | 1.09933E-05 | 0.010228187 |
| 930.439984 | 404.68934  | 9.13327E-06 | 0.008497964 |
| 930.479984 | 347.882892 | 7.85123E-06 | 0.007305415 |
| 930.519984 | 334.247007 | 7.54349E-06 | 0.007019368 |
| 930.559984 | 353.987604 | 7.98901E-06 | 0.00743425  |
| 930.599984 | 381.423765 | 8.6082E-06  | 0.008010794 |
| 930.639984 | 382.208886 | 8.62592E-06 | 0.008027628 |
| 930.679984 | 400.524352 | 9.03928E-06 | 0.008412674 |
| 930.719984 | 413.798464 | 9.33885E-06 | 0.008691859 |
| 930.759984 | 413.120814 | 9.32356E-06 | 0.008677998 |
| 930.799984 | 384.973751 | 8.68832E-06 | 0.008087089 |
| 930.839984 | 345.863807 | 7.80566E-06 | 0.007265825 |
| 930.879984 | 334.547758 | 7.55028E-06 | 0.007028402 |
| 930.919984 | 326.791449 | 7.37523E-06 | 0.006865747 |
| 930.959984 | 355.065487 | 8.01333E-06 | 0.007460093 |
| 930.999984 | 425.353515 | 9.59964E-06 | 0.008937261 |
| 931.039984 | 544.749562 | 1.22942E-05 | 0.011446428 |
| 931.079984 | 668.836683 | 1.50947E-05 | 0.014054385 |
| 931.119984 | 770.278561 | 1.73841E-05 | 0.016186696 |
| 931.159984 | 855.436651 | 1.9306E-05  | 0.017976987 |
| 931.199984 | 931.21531  | 2.10162E-05 | 0.019570315 |
| 931.239984 | 920.421173 | 2.07726E-05 | 0.019344298 |
| 931.279984 | 847.900866 | 1.91359E-05 | 0.017820919 |
| 931.319984 | 767.237367 | 1.73155E-05 | 0.016126251 |
| 931.359984 | 672.483552 | 1.5177E-05  | 0.014135266 |
| 931.399984 | 556.897029 | 1.25684E-05 | 0.011706198 |
| 931.439984 | 451.029365 | 1.01791E-05 | 0.009481225 |
| 931.479984 | 361.206369 | 8.15192E-06 | 0.007593355 |
| 931.519984 | 327.611788 | 7.39374E-06 | 0.006887418 |
| 931.559984 | 329.584331 | 7.43826E-06 | 0.006929185 |
| 931.599984 | 313.194466 | 7.06836E-06 | 0.006584887 |
| 931.639984 | 317.796611 | 7.17223E-06 | 0.006681933 |
| 931.679984 | 344.31818  | 7.77078E-06 | 0.007239882 |
| 931.719984 | 358.96274  | 8.10129E-06 | 0.007548133 |
| 931.759984 | 344.437729 | 7.77348E-06 | 0.007243017 |
| 931.799984 | 331.172951 | 7.47411E-06 | 0.006964378 |
| 931.839984 | 342.883143 | 7.73839E-06 | 0.007210946 |
| 931.879984 | 334.979336 | 7.56002E-06 | 0.007045029 |
| 931.919984 | 321.112153 | 7.24705E-06 | 0.006753674 |
| 931.959984 | 335.775806 | 7.57799E-06 | 0.007062386 |
| 931.999984 | 371.320893 | 8.3802E-06  | 0.007810342 |

|            |             |             |             |
|------------|-------------|-------------|-------------|
| 932.039984 | 425.095382  | 9.59381E-06 | 0.008941815 |
| 932.079984 | 533.094608  | 1.20312E-05 | 0.011214043 |
| 932.119984 | 627.391521  | 1.41594E-05 | 0.013198216 |
| 932.159984 | 697.447099  | 1.57404E-05 | 0.01467258  |
| 932.199984 | 783.038757  | 1.76721E-05 | 0.016473926 |
| 932.239984 | 780.691542  | 1.76191E-05 | 0.016425249 |
| 932.279984 | 717.062578  | 1.61831E-05 | 0.015087184 |
| 932.319984 | 674.790654  | 1.52291E-05 | 0.01419838  |
| 932.359984 | 605.2264    | 1.36591E-05 | 0.012735214 |
| 932.399984 | 495.240739  | 1.11769E-05 | 0.010421335 |
| 932.439984 | 377.8013    | 8.52645E-06 | 0.007950402 |
| 932.479984 | 324.021393  | 7.31271E-06 | 0.006818957 |
| 932.519984 | 315.763955  | 7.12635E-06 | 0.006645466 |
| 932.559984 | 292.461444  | 6.60045E-06 | 0.006155313 |
| 932.599984 | 286.101657  | 6.45692E-06 | 0.00602172  |
| 932.639984 | 298.719013  | 6.74167E-06 | 0.006287553 |
| 932.679984 | 337.666562  | 7.62066E-06 | 0.007107641 |
| 932.719984 | 381.59625   | 8.6121E-06  | 0.008032674 |
| 932.759984 | 383.341581  | 8.65149E-06 | 0.00806976  |
| 932.799984 | 356.849674  | 8.0536E-06  | 0.007512398 |
| 932.839984 | 335.350695  | 7.5684E-06  | 0.007060104 |
| 932.879984 | 351.0473    | 7.92265E-06 | 0.00739088  |
| 932.919984 | 375.310853  | 8.47024E-06 | 0.007902059 |
| 932.959984 | 397.631553  | 8.97399E-06 | 0.008372374 |
| 932.999984 | 460.383849  | 1.03902E-05 | 0.009694077 |
| 933.039984 | 544.440805  | 1.22873E-05 | 0.011464515 |
| 933.079984 | 670.63578   | 1.51353E-05 | 0.01412246  |
| 933.119984 | 846.448019  | 1.91032E-05 | 0.017825534 |
| 933.159984 | 955.732192  | 2.15695E-05 | 0.020127836 |
| 933.199984 | 988.684786  | 2.23132E-05 | 0.020822714 |
| 933.239984 | 1023.879739 | 2.31075E-05 | 0.02156488  |
| 933.279984 | 1001.537621 | 2.26033E-05 | 0.021095216 |
| 933.319984 | 868.668447  | 1.96046E-05 | 0.018297399 |
| 933.359984 | 717.635     | 1.6196E-05  | 0.015116719 |
| 933.399984 | 568.065876  | 1.28205E-05 | 0.011966613 |
| 933.439984 | 449.16544   | 1.0137E-05  | 0.009462317 |
| 933.479984 | 370.758048  | 8.36749E-06 | 0.007810887 |
| 933.519984 | 337.869095  | 7.62523E-06 | 0.007118309 |
| 933.559984 | 349.588878  | 7.88973E-06 | 0.00736554  |
| 933.599984 | 355.043902  | 8.01285E-06 | 0.007480793 |
| 933.639984 | 365.457669  | 8.24787E-06 | 0.007700542 |
| 933.679984 | 359.712433  | 8.11821E-06 | 0.007579809 |
| 933.719984 | 331.496001  | 7.4814E-06  | 0.006985535 |
| 933.759984 | 323.693352  | 7.30531E-06 | 0.006821404 |
| 933.799984 | 317.079654  | 7.15605E-06 | 0.006682316 |
| 933.839984 | 285.588017  | 6.44532E-06 | 0.006018901 |

|            |            |             |             |
|------------|------------|-------------|-------------|
| 933.879984 | 262.886776 | 5.93299E-06 | 0.005540699 |
| 933.919984 | 247.313278 | 5.58152E-06 | 0.00521269  |
| 933.959984 | 267.801419 | 6.04391E-06 | 0.005644765 |
| 933.999984 | 352.38888  | 7.95293E-06 | 0.007428033 |
| 934.039984 | 473.629841 | 1.06892E-05 | 0.009984108 |
| 934.079984 | 575.306546 | 1.29839E-05 | 0.012127971 |
| 934.119984 | 664.670987 | 1.50007E-05 | 0.014012452 |
| 934.159984 | 741.081314 | 1.67252E-05 | 0.015623987 |
| 934.199984 | 777.96683  | 1.75576E-05 | 0.016402336 |
| 934.239984 | 788.222249 | 1.77891E-05 | 0.016619268 |
| 934.279984 | 763.686792 | 1.72353E-05 | 0.01610264  |
| 934.319984 | 711.647015 | 1.60609E-05 | 0.015006003 |
| 934.359984 | 626.970834 | 1.41499E-05 | 0.013221061 |
| 934.399984 | 551.501705 | 1.24466E-05 | 0.011630126 |
| 934.439984 | 477.407874 | 1.07744E-05 | 0.010068059 |
| 934.479984 | 378.037166 | 8.53177E-06 | 0.00797277  |
| 934.519984 | 333.834033 | 7.53417E-06 | 0.007040832 |
| 934.559984 | 324.633942 | 7.32654E-06 | 0.006847087 |
| 934.599984 | 348.275072 | 7.86008E-06 | 0.007346034 |
| 934.639984 | 356.177645 | 8.03843E-06 | 0.007513041 |
| 934.679984 | 348.178815 | 7.85791E-06 | 0.007344632 |
| 934.719984 | 372.52129  | 8.40729E-06 | 0.007858459 |
| 934.759984 | 384.118464 | 8.66902E-06 | 0.008103452 |
| 934.799984 | 377.577736 | 8.5214E-06  | 0.007965808 |
| 934.839984 | 364.835688 | 8.23383E-06 | 0.007697317 |
| 934.879984 | 359.056725 | 8.10341E-06 | 0.007575716 |
| 934.919984 | 364.654229 | 8.22974E-06 | 0.007694147 |
| 934.959984 | 397.668726 | 8.97483E-06 | 0.008391106 |
| 934.999984 | 444.416893 | 1.00299E-05 | 0.009377929 |
| 935.039984 | 525.624822 | 1.18626E-05 | 0.011092024 |
| 935.079984 | 684.621167 | 1.54509E-05 | 0.01444787  |
| 935.119984 | 830.340913 | 1.87396E-05 | 0.01752381  |
| 935.159984 | 927.786627 | 2.09389E-05 | 0.019581176 |
| 935.199984 | 983.615023 | 2.21988E-05 | 0.020760337 |
| 935.239984 | 986.433976 | 2.22624E-05 | 0.020820725 |
| 935.279984 | 943.309102 | 2.12892E-05 | 0.019911337 |
| 935.319984 | 853.309509 | 1.9258E-05  | 0.018012399 |
| 935.359984 | 743.284753 | 1.67749E-05 | 0.015690572 |
| 935.399984 | 619.276311 | 1.39762E-05 | 0.013073341 |
| 935.439984 | 504.869139 | 1.13942E-05 | 0.010658584 |
| 935.479984 | 431.43163  | 9.73681E-06 | 0.009108592 |
| 935.519984 | 377.67833  | 8.52367E-06 | 0.007974067 |
| 935.559984 | 331.589431 | 7.48351E-06 | 0.007001274 |
| 935.599984 | 308.904774 | 6.97155E-06 | 0.006522583 |
| 935.639984 | 317.85792  | 7.17361E-06 | 0.006711917 |
| 935.679984 | 338.367927 | 7.63649E-06 | 0.007145313 |

|            |             |             |             |
|------------|-------------|-------------|-------------|
| 935.719984 | 362.712797  | 8.18592E-06 | 0.007659731 |
| 935.759984 | 367.675174  | 8.29792E-06 | 0.007764858 |
| 935.799984 | 343.81527   | 7.75943E-06 | 0.007261276 |
| 935.839984 | 322.113808  | 7.26966E-06 | 0.006803238 |
| 935.879984 | 310.978428  | 7.01835E-06 | 0.006568333 |
| 935.919984 | 318.412364  | 7.18612E-06 | 0.006725637 |
| 935.959984 | 328.156693  | 7.40604E-06 | 0.006931757 |
| 935.999984 | 378.731449  | 8.54744E-06 | 0.008000405 |
| 936.039984 | 447.954851  | 1.01097E-05 | 0.009463099 |
| 936.079984 | 548.462305  | 1.2378E-05  | 0.011586826 |
| 936.119984 | 648.386333  | 1.46332E-05 | 0.013698409 |
| 936.159984 | 732.352575  | 1.65282E-05 | 0.015473018 |
| 936.199984 | 767.130916  | 1.73131E-05 | 0.016208502 |
| 936.239984 | 777.662023  | 1.75507E-05 | 0.016431713 |
| 936.279984 | 764.538484  | 1.72546E-05 | 0.016155107 |
| 936.319984 | 698.390998  | 1.57617E-05 | 0.014758006 |
| 936.359984 | 580.335413  | 1.30974E-05 | 0.012263846 |
| 936.399984 | 512.580537  | 1.15682E-05 | 0.010832489 |
| 936.439984 | 478.678914  | 1.08031E-05 | 0.01011647  |
| 936.479984 | 409.764908  | 9.24782E-06 | 0.008660401 |
| 936.519984 | 362.410354  | 8.1791E-06  | 0.007659888 |
| 936.559984 | 361.33518   | 8.15483E-06 | 0.007637489 |
| 936.599984 | 390.940804  | 8.82299E-06 | 0.008263612 |
| 936.639984 | 387.627605  | 8.74822E-06 | 0.008193928 |
| 936.679984 | 363.72111   | 8.20868E-06 | 0.007688905 |
| 936.719984 | 348.431001  | 7.8636E-06  | 0.007365993 |
| 936.759984 | 375.768942  | 8.48058E-06 | 0.00794427  |
| 936.799984 | 386.306034  | 8.71839E-06 | 0.008167387 |
| 936.839984 | 357.500326  | 8.06828E-06 | 0.007558691 |
| 936.879984 | 350.083712  | 7.9009E-06  | 0.007402197 |
| 936.919984 | 353.596177  | 7.98017E-06 | 0.007476784 |
| 936.959984 | 415.204734  | 9.37059E-06 | 0.00877987  |
| 936.999984 | 493.686086  | 1.11418E-05 | 0.010439873 |
| 937.039984 | 638.440375  | 1.44087E-05 | 0.013501537 |
| 937.079984 | 781.862418  | 1.76455E-05 | 0.016535288 |
| 937.119984 | 903.042769  | 2.03804E-05 | 0.019098896 |
| 937.159984 | 993.66074   | 2.24255E-05 | 0.021016318 |
| 937.199984 | 1032.102205 | 2.32931E-05 | 0.021830302 |
| 937.239984 | 1042.824508 | 2.35351E-05 | 0.022058034 |
| 937.279984 | 987.71317   | 2.22913E-05 | 0.020893199 |
| 937.319984 | 869.130759  | 1.96151E-05 | 0.018385598 |
| 937.359984 | 790.237695  | 1.78346E-05 | 0.016717407 |
| 937.399984 | 799.236514  | 1.80377E-05 | 0.016908497 |
| 937.439984 | 831.463782  | 1.8765E-05  | 0.017591042 |
| 937.479984 | 826.597917  | 1.86552E-05 | 0.017488843 |
| 937.519984 | 767.040807  | 1.7311E-05  | 0.016229448 |

|            |             |             |             |
|------------|-------------|-------------|-------------|
| 937.559984 | 685.612649  | 1.54733E-05 | 0.014507168 |
| 937.599984 | 569.628044  | 1.28557E-05 | 0.012053515 |
| 937.639984 | 466.192607  | 1.05213E-05 | 0.009865208 |
| 937.679984 | 395.499931  | 8.92588E-06 | 0.008369621 |
| 937.719984 | 372.593924  | 8.40893E-06 | 0.007885218 |
| 937.759984 | 375.145416  | 8.46651E-06 | 0.007939554 |
| 937.799984 | 379.572421  | 8.56642E-06 | 0.008033589 |
| 937.839984 | 350.514429  | 7.91062E-06 | 0.007418898 |
| 937.879984 | 310.539946  | 7.00845E-06 | 0.006573089 |
| 937.919984 | 306.626794  | 6.92014E-06 | 0.006490537 |
| 937.959984 | 327.329765  | 7.38738E-06 | 0.006929064 |
| 937.999984 | 377.360718  | 8.51651E-06 | 0.007988482 |
| 938.039984 | 452.386182  | 1.02097E-05 | 0.009577131 |
| 938.079984 | 521.834874  | 1.17771E-05 | 0.011047849 |
| 938.119984 | 640.351731  | 1.44518E-05 | 0.013557566 |
| 938.159984 | 752.803832  | 1.69897E-05 | 0.015939089 |
| 938.199983 | 802.368214  | 1.81083E-05 | 0.016989238 |
| 938.239983 | 808.985004  | 1.82577E-05 | 0.017130071 |
| 938.279983 | 781.929955  | 1.76471E-05 | 0.016557892 |
| 938.319983 | 740.912294  | 1.67214E-05 | 0.015689985 |
| 938.359983 | 689.721356  | 1.55661E-05 | 0.014606559 |
| 938.399983 | 643.15855   | 1.45152E-05 | 0.013621057 |
| 938.439983 | 616.578411  | 1.39153E-05 | 0.013058689 |
| 938.479983 | 579.862523  | 1.30867E-05 | 0.012281596 |
| 938.519983 | 548.33712   | 1.23752E-05 | 0.011614377 |
| 938.559983 | 487.975655  | 1.10129E-05 | 0.010336296 |
| 938.599983 | 471.744717  | 1.06466E-05 | 0.009992918 |
| 938.639983 | 466.357349  | 1.0525E-05  | 0.009879219 |
| 938.679983 | 409.169063  | 9.23438E-06 | 0.008668124 |
| 938.719983 | 384.607155  | 8.68005E-06 | 0.008148134 |
| 938.759983 | 386.135464  | 8.71454E-06 | 0.008180861 |
| 938.799983 | 394.474093  | 8.90273E-06 | 0.008357884 |
| 938.839983 | 419.618152  | 9.4702E-06  | 0.008891    |
| 938.879983 | 450.512754  | 1.01674E-05 | 0.009546011 |
| 938.919983 | 482.133874  | 1.08811E-05 | 0.010216473 |
| 938.959983 | 518.698008  | 1.17063E-05 | 0.010991739 |
| 938.999983 | 579.599814  | 1.30808E-05 | 0.012282834 |
| 939.039983 | 702.910752  | 1.58637E-05 | 0.014896664 |
| 939.079983 | 893.266283  | 2.01598E-05 | 0.018931642 |
| 939.119983 | 1074.25947  | 2.42445E-05 | 0.022768532 |
| 939.159983 | 1182.577925 | 2.66891E-05 | 0.025065369 |
| 939.199983 | 1251.976226 | 2.82554E-05 | 0.026537433 |
| 939.239983 | 1178.302259 | 2.65926E-05 | 0.024976871 |
| 939.279983 | 1015.201618 | 2.29117E-05 | 0.021520488 |
| 939.319983 | 845.318523  | 1.90777E-05 | 0.017920029 |
| 939.359983 | 705.976393  | 1.59329E-05 | 0.014966732 |

|            |             |             |             |
|------------|-------------|-------------|-------------|
| 939.399983 | 578.093812  | 1.30468E-05 | 0.012256138 |
| 939.439983 | 487.399097  | 1.09999E-05 | 0.010333763 |
| 939.479983 | 455.461213  | 1.02791E-05 | 0.009657032 |
| 939.519983 | 412.305114  | 9.30515E-06 | 0.008742376 |
| 939.559983 | 391.124158  | 8.82713E-06 | 0.008293616 |
| 939.599983 | 386.955759  | 8.73305E-06 | 0.008205576 |
| 939.639983 | 386.454408  | 8.72174E-06 | 0.008195293 |
| 939.679983 | 375.249996  | 8.46887E-06 | 0.007958027 |
| 939.719983 | 374.880514  | 8.46053E-06 | 0.00795053  |
| 939.759983 | 376.8283    | 8.50449E-06 | 0.007992179 |
| 939.799983 | 350.218113  | 7.90393E-06 | 0.007428118 |
| 939.839983 | 333.087524  | 7.51732E-06 | 0.007065079 |
| 939.879983 | 344.871927  | 7.78328E-06 | 0.007315348 |
| 939.919983 | 371.660633  | 8.38786E-06 | 0.00788392  |
| 939.959983 | 402.619508  | 9.08656E-06 | 0.008541004 |
| 939.999983 | 441.276982  | 9.95901E-06 | 0.009361466 |
| 940.039983 | 549.632225  | 1.24044E-05 | 0.011660664 |
| 940.079983 | 723.346486  | 1.63249E-05 | 0.015346733 |
| 940.119983 | 880.351279  | 1.98683E-05 | 0.018678588 |
| 940.159983 | 990.931139  | 2.23639E-05 | 0.021025677 |
| 940.199983 | 1050.579218 | 2.37101E-05 | 0.022292245 |
| 940.239983 | 1026.244761 | 2.31609E-05 | 0.021776818 |
| 940.279983 | 923.838372  | 2.08497E-05 | 0.019604598 |
| 940.319983 | 788.466993  | 1.77946E-05 | 0.01673262  |
| 940.359983 | 622.179515  | 1.40417E-05 | 0.013204276 |
| 940.399983 | 491.89746   | 1.11014E-05 | 0.010439794 |
| 940.439983 | 431.754784  | 9.7441E-06  | 0.009163745 |
| 940.479983 | 402.31607   | 9.07971E-06 | 0.008539289 |
| 940.519983 | 400.635133  | 9.04178E-06 | 0.008503972 |
| 940.559983 | 407.875394  | 9.20518E-06 | 0.008658023 |
| 940.599983 | 396.556798  | 8.94973E-06 | 0.00841812  |
| 940.639983 | 411.156245  | 9.27922E-06 | 0.008728409 |
| 940.679983 | 423.538427  | 9.55867E-06 | 0.008991652 |
| 940.719983 | 456.868146  | 1.03109E-05 | 0.009699649 |
| 940.759983 | 454.829293  | 1.02649E-05 | 0.009656773 |
| 940.799983 | 418.334045  | 9.44122E-06 | 0.008882297 |
| 940.839983 | 425.465791  | 9.60217E-06 | 0.009034106 |
| 940.879983 | 433.127963  | 9.77509E-06 | 0.009197191 |
| 940.919983 | 446.336147  | 1.00732E-05 | 0.009478061 |
| 940.959983 | 535.295856  | 1.20809E-05 | 0.011367626 |
| 940.999983 | 663.691368  | 1.49786E-05 | 0.014094853 |
| 941.039983 | 795.78052   | 1.79597E-05 | 0.016900756 |
| 941.079983 | 959.030013  | 2.1644E-05  | 0.020368708 |
| 941.119983 | 1158.33737  | 2.61421E-05 | 0.024602816 |
| 941.159983 | 1329.277985 | 3E-05       | 0.028234755 |
| 941.199983 | 1392.713551 | 3.14316E-05 | 0.029583426 |

|            |             |             |             |
|------------|-------------|-------------|-------------|
| 941.239983 | 1319.75173  | 2.9785E-05  | 0.028034794 |
| 941.279983 | 1124.129162 | 2.537E-05   | 0.023880301 |
| 941.319983 | 913.380843  | 2.06137E-05 | 0.019404119 |
| 941.359983 | 748.197482  | 1.68858E-05 | 0.015895593 |
| 941.399983 | 577.751426  | 1.3039E-05  | 0.012274957 |
| 941.439983 | 440.114494  | 9.93277E-06 | 0.009351108 |
| 941.479983 | 340.398723  | 7.68233E-06 | 0.007232755 |
| 941.519983 | 294.368081  | 6.64348E-06 | 0.006254967 |
| 941.559983 | 303.29413   | 6.84493E-06 | 0.006444908 |
| 941.599983 | 312.703003  | 7.05727E-06 | 0.006645126 |
| 941.639983 | 323.440802  | 7.29961E-06 | 0.006873603 |
| 941.679983 | 352.989773  | 7.96649E-06 | 0.007501882 |
| 941.719983 | 371.014254  | 8.37327E-06 | 0.00788528  |
| 941.759983 | 404.032846  | 9.11846E-06 | 0.008587399 |
| 941.799983 | 398.85185   | 9.00153E-06 | 0.008477641 |
| 941.839983 | 355.92367   | 8.0327E-06  | 0.007565519 |
| 941.879983 | 332.877585  | 7.51258E-06 | 0.007075952 |
| 941.919983 | 342.207402  | 7.72314E-06 | 0.007274584 |
| 941.959983 | 380.316302  | 8.58321E-06 | 0.00808504  |
| 941.999983 | 460.257864  | 1.03874E-05 | 0.009784911 |
| 942.039983 | 576.282959  | 1.30059E-05 | 0.012252081 |
| 942.079983 | 692.924775  | 1.56383E-05 | 0.014732574 |
| 942.119983 | 811.974381  | 1.83251E-05 | 0.017264472 |
| 942.159983 | 942.613707  | 2.12735E-05 | 0.02004302  |
| 942.199983 | 956.900211  | 2.15959E-05 | 0.020347661 |
| 942.239983 | 893.331839  | 2.01613E-05 | 0.018996741 |
| 942.279983 | 842.892084  | 1.90229E-05 | 0.017924898 |
| 942.319983 | 754.527166  | 1.70286E-05 | 0.016046416 |
| 942.359983 | 616.467206  | 1.39128E-05 | 0.013110872 |
| 942.399983 | 480.865476  | 1.08525E-05 | 0.010227362 |
| 942.439983 | 411.024375  | 9.27625E-06 | 0.008742307 |
| 942.479983 | 377.203082  | 8.51295E-06 | 0.008023283 |
| 942.519983 | 381.122145  | 8.6014E-06  | 0.008106988 |
| 942.559983 | 400.073889  | 9.02911E-06 | 0.008510478 |
| 942.599983 | 406.47055   | 9.17347E-06 | 0.008646917 |
| 942.639983 | 415.61441   | 9.37984E-06 | 0.008841811 |
| 942.679983 | 422.842915  | 9.54298E-06 | 0.008995972 |
| 942.719983 | 426.409701  | 9.62347E-06 | 0.00907224  |
| 942.759983 | 429.448797  | 9.69206E-06 | 0.009137287 |
| 942.799983 | 414.018144  | 9.34381E-06 | 0.008809347 |
| 942.839983 | 385.109998  | 8.6914E-06  | 0.008194596 |
| 942.879983 | 374.223475  | 8.4457E-06  | 0.007963284 |
| 942.919983 | 390.156761  | 8.80529E-06 | 0.008302688 |
| 942.959983 | 440.544278  | 9.94247E-06 | 0.009375352 |
| 942.999983 | 531.81657   | 1.20024E-05 | 0.011318225 |
| 943.039983 | 657.401354  | 1.48366E-05 | 0.013991538 |



|            |             |             |             |
|------------|-------------|-------------|-------------|
| 943.079983 | 782.349613  | 1.76565E-05 | 0.01665153  |
| 943.119983 | 902.98049   | 2.0379E-05  | 0.019219853 |
| 943.159983 | 1009.926379 | 2.27926E-05 | 0.021497098 |
| 943.199983 | 1096.665132 | 2.47502E-05 | 0.023344392 |
| 943.239983 | 1066.925099 | 2.4079E-05  | 0.022712288 |
| 943.279983 | 954.399371  | 2.15395E-05 | 0.020317746 |
| 943.319983 | 820.463922  | 1.85167E-05 | 0.017467199 |
| 943.359983 | 679.300513  | 1.53309E-05 | 0.014462526 |
| 943.399983 | 528.030171  | 1.19169E-05 | 0.011242408 |
| 943.439983 | 431.106282  | 9.72947E-06 | 0.009179169 |
| 943.479983 | 398.041743  | 8.98325E-06 | 0.008475514 |
| 943.519983 | 392.329398  | 8.85433E-06 | 0.008354235 |
| 943.559983 | 395.194518  | 8.91899E-06 | 0.008415602 |
| 943.599983 | 383.247651  | 8.64937E-06 | 0.008161541 |
| 943.639983 | 369.329825  | 8.33526E-06 | 0.007865484 |
| 943.679983 | 376.67518   | 8.50103E-06 | 0.008022256 |
| 943.719983 | 390.711065  | 8.8178E-06  | 0.008321538 |
| 943.759983 | 382.186272  | 8.62541E-06 | 0.008140319 |
| 943.799983 | 382.702165  | 8.63705E-06 | 0.008151652 |
| 943.839983 | 395.022462  | 8.91511E-06 | 0.008414434 |
| 943.879983 | 378.446925  | 8.54102E-06 | 0.008061698 |
| 943.919983 | 353.277363  | 7.97298E-06 | 0.007525853 |
| 943.959983 | 363.023168  | 8.19293E-06 | 0.007733795 |
| 943.999983 | 409.923464  | 9.2514E-06  | 0.008733323 |
| 944.039983 | 493.218868  | 1.11313E-05 | 0.010508357 |
| 944.079983 | 590.289795  | 1.3322E-05  | 0.012577051 |
| 944.119983 | 682.703238  | 1.54077E-05 | 0.014546681 |
| 944.159983 | 770.608893  | 1.73916E-05 | 0.016420424 |
| 944.199983 | 811.958392  | 1.83248E-05 | 0.017302247 |
| 944.239983 | 804.093744  | 1.81473E-05 | 0.017135383 |
| 944.279983 | 760.346541  | 1.716E-05   | 0.016203809 |
| 944.319983 | 664.342131  | 1.49933E-05 | 0.014158451 |
| 944.359983 | 586.749943  | 1.32421E-05 | 0.012505337 |
| 944.399983 | 539.439537  | 1.21744E-05 | 0.011497502 |
| 944.439983 | 487.953753  | 1.10124E-05 | 0.010400585 |
| 944.479983 | 457.668972  | 1.0329E-05  | 0.009755488 |
| 944.519983 | 483.407877  | 1.09098E-05 | 0.010304564 |
| 944.559983 | 494.634396  | 1.11632E-05 | 0.010544321 |
| 944.599983 | 448.356697  | 1.01188E-05 | 0.009558205 |
| 944.639983 | 378.86633   | 8.55049E-06 | 0.00807713  |
| 944.679983 | 353.337143  | 7.97433E-06 | 0.007533187 |
| 944.719983 | 378.213297  | 8.53575E-06 | 0.008063891 |
| 944.759983 | 394.640084  | 8.90648E-06 | 0.008414483 |
| 944.799983 | 367.529319  | 8.29462E-06 | 0.007836761 |
| 944.839983 | 332.160238  | 7.49639E-06 | 0.007082893 |
| 944.879983 | 339.618195  | 7.66471E-06 | 0.007242231 |

|            |            |             |             |
|------------|------------|-------------|-------------|
| 944.919983 | 367.866488 | 8.30223E-06 | 0.007844947 |
| 944.959983 | 375.44828  | 8.47334E-06 | 0.008006972 |
| 944.999983 | 410.902819 | 9.2735E-06  | 0.008763461 |
| 945.039983 | 520.045229 | 1.17367E-05 | 0.011091647 |
| 945.079983 | 680.483752 | 1.53576E-05 | 0.014514132 |
| 945.119983 | 810.877137 | 1.83004E-05 | 0.017296043 |
| 945.159983 | 902.471492 | 2.03675E-05 | 0.019250569 |
| 945.199983 | 957.324226 | 2.16055E-05 | 0.020421494 |
| 945.239983 | 937.465143 | 2.11573E-05 | 0.019998709 |
| 945.279983 | 838.92764  | 1.89334E-05 | 0.017897391 |
| 945.319983 | 714.144578 | 1.61172E-05 | 0.015235957 |
| 945.359983 | 604.944473 | 1.36528E-05 | 0.012906767 |
| 945.399983 | 500.941428 | 1.13056E-05 | 0.010688267 |
| 945.439983 | 423.196612 | 9.55096E-06 | 0.009029858 |
| 945.479983 | 383.114204 | 8.64635E-06 | 0.008174955 |
| 945.519983 | 375.399019 | 8.47223E-06 | 0.008010666 |
| 945.559983 | 364.492141 | 8.22608E-06 | 0.007778252 |
| 945.599983 | 380.354942 | 8.58408E-06 | 0.008117107 |
| 945.639983 | 411.990824 | 9.29806E-06 | 0.008792616 |
| 945.679983 | 406.657081 | 9.17768E-06 | 0.008679152 |
| 945.719983 | 391.795942 | 8.84229E-06 | 0.008362329 |
| 945.759983 | 366.577769 | 8.27315E-06 | 0.007824414 |
| 945.799983 | 327.300851 | 7.38672E-06 | 0.006986364 |
| 945.839983 | 309.304008 | 6.98056E-06 | 0.006602493 |
| 945.879983 | 316.973226 | 7.15364E-06 | 0.006766489 |
| 945.919983 | 321.173358 | 7.24844E-06 | 0.00685644  |
| 945.959983 | 346.572609 | 7.82166E-06 | 0.007398978 |
| 945.999983 | 399.204665 | 9.00949E-06 | 0.00852298  |
| 946.039983 | 452.851072 | 1.02202E-05 | 0.009668735 |
| 946.079983 | 538.269029 | 1.2148E-05  | 0.011492963 |
| 946.119983 | 634.582339 | 1.43216E-05 | 0.013549989 |
| 946.159983 | 719.254929 | 1.62326E-05 | 0.015358619 |
| 946.199983 | 773.892772 | 1.74657E-05 | 0.016526028 |
| 946.239983 | 762.334735 | 1.72048E-05 | 0.016279901 |
| 946.279983 | 694.10762  | 1.5665E-05  | 0.014823516 |
| 946.319983 | 585.37065  | 1.3211E-05  | 0.012501834 |
| 946.359983 | 490.705161 | 1.10745E-05 | 0.010480494 |
| 946.399983 | 432.126936 | 9.7525E-06  | 0.009229769 |
| 946.439983 | 396.987233 | 8.95945E-06 | 0.008479581 |
| 946.479983 | 362.789898 | 8.18766E-06 | 0.007749459 |
| 946.519983 | 349.847844 | 7.89558E-06 | 0.007473323 |
| 946.559983 | 358.713577 | 8.09567E-06 | 0.007663033 |
| 946.599983 | 373.608897 | 8.43183E-06 | 0.007981572 |
| 946.639983 | 368.044515 | 8.30625E-06 | 0.00786303  |
| 946.679983 | 379.971323 | 8.57542E-06 | 0.008118182 |
| 946.719983 | 400.525753 | 9.03931E-06 | 0.008557694 |

|            |            |             |             |
|------------|------------|-------------|-------------|
| 946.759983 | 406.606969 | 9.17655E-06 | 0.008687993 |
| 946.799983 | 400.546479 | 9.03978E-06 | 0.00855886  |
| 946.839983 | 366.03483  | 8.2609E-06  | 0.007821747 |
| 946.879983 | 338.142647 | 7.63141E-06 | 0.007226028 |
| 946.919983 | 371.950194 | 8.3944E-06  | 0.007948823 |
| 946.959983 | 434.19893  | 9.79927E-06 | 0.009279512 |
| 946.999983 | 517.32686  | 1.16753E-05 | 0.011056553 |
| 947.039983 | 624.758351 | 1.40999E-05 | 0.013353193 |
| 947.079983 | 721.221489 | 1.6277E-05  | 0.015415587 |
| 947.119983 | 806.600471 | 1.82038E-05 | 0.017241229 |
| 947.159983 | 928.022597 | 2.09442E-05 | 0.019837487 |
| 947.199983 | 995.422957 | 2.24653E-05 | 0.021279141 |
| 947.239983 | 958.790312 | 2.16386E-05 | 0.020496911 |
| 947.279983 | 885.254328 | 1.9979E-05  | 0.018925666 |
| 947.319983 | 775.065968 | 1.74922E-05 | 0.016570672 |
| 947.359983 | 632.074207 | 1.4265E-05  | 0.013514123 |
| 947.399983 | 522.975498 | 1.18028E-05 | 0.011182    |
| 947.439983 | 438.595107 | 9.89848E-06 | 0.009378216 |
| 947.479983 | 369.053059 | 8.32901E-06 | 0.007891574 |
| 947.519983 | 325.492691 | 7.34592E-06 | 0.006960403 |
| 947.559983 | 318.163048 | 7.1805E-06  | 0.006803951 |
| 947.599983 | 304.19141  | 6.86518E-06 | 0.006505441 |
| 947.639983 | 299.01888  | 6.74844E-06 | 0.006395091 |
| 947.679983 | 299.475583 | 6.75875E-06 | 0.006405129 |
| 947.719983 | 294.341978 | 6.64289E-06 | 0.006295598 |
| 947.759983 | 323.467508 | 7.30021E-06 | 0.006918848 |
| 947.799983 | 342.067395 | 7.71998E-06 | 0.007317001 |
| 947.839983 | 314.358698 | 7.09464E-06 | 0.006724582 |
| 947.879983 | 314.996562 | 7.10903E-06 | 0.006738511 |
| 947.919983 | 334.319222 | 7.54512E-06 | 0.007152169 |
| 947.959983 | 353.280329 | 7.97304E-06 | 0.007558128 |
| 947.999983 | 392.439338 | 8.85681E-06 | 0.008396255 |
| 948.039983 | 465.831824 | 1.05132E-05 | 0.009966911 |
| 948.079983 | 571.240477 | 1.28921E-05 | 0.012222744 |
| 948.119983 | 667.450098 | 1.50634E-05 | 0.014281929 |
| 948.159983 | 733.987824 | 1.65651E-05 | 0.015706349 |
| 948.199983 | 760.723232 | 1.71685E-05 | 0.016279137 |
| 948.239983 | 750.241056 | 1.69319E-05 | 0.0160555   |
| 948.279983 | 719.152193 | 1.62303E-05 | 0.015390834 |
| 948.319983 | 656.445393 | 1.48151E-05 | 0.014049416 |
| 948.359983 | 563.374445 | 1.27146E-05 | 0.012057996 |
| 948.399983 | 460.821334 | 1.04001E-05 | 0.009863451 |
| 948.439983 | 382.048461 | 8.6223E-06  | 0.008177736 |
| 948.479983 | 338.621704 | 7.64222E-06 | 0.007248493 |
| 948.519983 | 328.275054 | 7.40871E-06 | 0.00702731  |
| 948.559983 | 309.929222 | 6.99467E-06 | 0.006634865 |

|            |             |             |             |
|------------|-------------|-------------|-------------|
| 948.599983 | 300.0656    | 6.77206E-06 | 0.006423979 |
| 948.639983 | 304.90319   | 6.88124E-06 | 0.00652782  |
| 948.679983 | 338.335947  | 7.63577E-06 | 0.007243903 |
| 948.719983 | 376.809309  | 8.50406E-06 | 0.008067973 |
| 948.759983 | 377.209706  | 8.5131E-06  | 0.008076886 |
| 948.799983 | 362.007278  | 8.17E-06    | 0.007751696 |
| 948.839983 | 332.127393  | 7.49565E-06 | 0.007112175 |
| 948.879983 | 304.095034  | 6.863E-06   | 0.006512165 |
| 948.919983 | 320.338867  | 7.2296E-06  | 0.006860314 |
| 948.959983 | 392.560546  | 8.85954E-06 | 0.008407353 |
| 948.999983 | 502.334745  | 1.1337E-05  | 0.010758809 |
| 949.039983 | 616.476852  | 1.3913E-05  | 0.013204016 |
| 949.079983 | 777.087404  | 1.75378E-05 | 0.016644756 |
| 949.119983 | 971.282855  | 2.19205E-05 | 0.020805186 |
| 949.159983 | 1100.112175 | 2.4828E-05  | 0.023565744 |
| 949.199983 | 1112.269054 | 2.51024E-05 | 0.023827163 |
| 949.239983 | 1054.979258 | 2.38094E-05 | 0.022600846 |
| 949.279983 | 965.730273  | 2.17952E-05 | 0.020689735 |
| 949.319983 | 836.592494  | 1.88807E-05 | 0.017923852 |
| 949.359983 | 701.756267  | 1.58377E-05 | 0.015035642 |
| 949.399983 | 605.37879   | 1.36626E-05 | 0.01297123  |
| 949.439983 | 487.518843  | 1.10026E-05 | 0.010446329 |
| 949.479983 | 371.765063  | 8.39022E-06 | 0.007966346 |
| 949.519983 | 310.145589  | 6.99955E-06 | 0.006646216 |
| 949.559983 | 292.817515  | 6.60848E-06 | 0.006275151 |
| 949.599983 | 318.245502  | 7.18236E-06 | 0.006820367 |
| 949.639983 | 351.370746  | 7.92995E-06 | 0.007530596 |
| 949.679983 | 338.900205  | 7.64851E-06 | 0.007263633 |
| 949.719983 | 305.296049  | 6.89011E-06 | 0.006543672 |
| 949.759983 | 303.524228  | 6.85012E-06 | 0.006505969 |
| 949.799983 | 328.534973  | 7.41458E-06 | 0.007042365 |
| 949.839983 | 330.943938  | 7.46894E-06 | 0.007094301 |
| 949.879983 | 328.79796   | 7.42051E-06 | 0.007048596 |
| 949.919983 | 341.789477  | 7.71371E-06 | 0.00732741  |
| 949.959983 | 345.363961  | 7.79438E-06 | 0.007404352 |
| 949.999983 | 376.543981  | 8.49807E-06 | 0.008073169 |
| 950.039983 | 461.481693  | 1.0415E-05  | 0.009894665 |
| 950.079983 | 561.123159  | 1.26638E-05 | 0.012031593 |
| 950.119983 | 641.211912  | 1.44713E-05 | 0.013749433 |
| 950.159983 | 710.092872  | 1.60258E-05 | 0.015227081 |
| 950.199983 | 738.890605  | 1.66757E-05 | 0.01584528  |
| 950.239983 | 739.352548  | 1.66862E-05 | 0.015855854 |
| 950.279983 | 698.294593  | 1.57595E-05 | 0.014975972 |
| 950.319983 | 637.053696  | 1.43774E-05 | 0.013663144 |
| 950.359983 | 522.619438  | 1.17948E-05 | 0.011209299 |
| 950.399983 | 410.093055  | 9.25523E-06 | 0.00879617  |

|            |             |             |             |
|------------|-------------|-------------|-------------|
| 950.439983 | 350.903529  | 7.9194E-06  | 0.007526918 |
| 950.479983 | 344.747049  | 7.78046E-06 | 0.007395172 |
| 950.519983 | 349.35672   | 7.88449E-06 | 0.00749437  |
| 950.559983 | 352.324551  | 7.95147E-06 | 0.007558353 |
| 950.599983 | 354.32915   | 7.99672E-06 | 0.007601678 |
| 950.639983 | 350.039394  | 7.8999E-06  | 0.007509962 |
| 950.679983 | 345.685363  | 7.80164E-06 | 0.00741686  |
| 950.719983 | 359.754313  | 8.11915E-06 | 0.007719042 |
| 950.759983 | 394.194113  | 8.89641E-06 | 0.008458353 |
| 950.799983 | 413.212086  | 9.32562E-06 | 0.008866801 |
| 950.839983 | 420.512811  | 9.49039E-06 | 0.009023841 |
| 950.879983 | 398.943924  | 9.00361E-06 | 0.008561351 |
| 950.919983 | 380.130245  | 8.57901E-06 | 0.008157952 |
| 950.959983 | 449.435115  | 1.01431E-05 | 0.009645706 |
| 950.999983 | 584.487878  | 1.31911E-05 | 0.012544714 |
| 951.039983 | 735.382697  | 1.65966E-05 | 0.015783995 |
| 951.079983 | 887.445647  | 2.00284E-05 | 0.019048622 |
| 951.119983 | 1041.792642 | 2.35118E-05 | 0.022362551 |
| 951.159983 | 1127.354036 | 2.54428E-05 | 0.024200183 |
| 951.199983 | 1103.591895 | 2.49065E-05 | 0.023691093 |
| 951.239983 | 1053.445214 | 2.37748E-05 | 0.022615532 |
| 951.279983 | 959.875589  | 2.16631E-05 | 0.020607631 |
| 951.319983 | 808.213674  | 1.82403E-05 | 0.017352321 |
| 951.359983 | 670.763137  | 1.51382E-05 | 0.014401868 |
| 951.399983 | 566.113216  | 1.27764E-05 | 0.012155454 |
| 951.439983 | 484.827313  | 1.09419E-05 | 0.010410539 |
| 951.479983 | 412.437723  | 9.30814E-06 | 0.008856514 |
| 951.519983 | 358.891413  | 8.09968E-06 | 0.007707007 |
| 951.559983 | 308.080127  | 6.95294E-06 | 0.006616139 |
| 951.599983 | 289.909915  | 6.54286E-06 | 0.006226188 |
| 951.639983 | 334.517296  | 7.54959E-06 | 0.007184491 |
| 951.679983 | 352.619055  | 7.95812E-06 | 0.007573584 |
| 951.719983 | 356.952311  | 8.05592E-06 | 0.007666977 |
| 951.759983 | 341.064658  | 7.69735E-06 | 0.007326034 |
| 951.799983 | 300.261406  | 6.77648E-06 | 0.006449855 |
| 951.839983 | 282.520697  | 6.3761E-06  | 0.006069026 |
| 951.879983 | 329.36077   | 7.43321E-06 | 0.007075527 |
| 951.919983 | 380.886619  | 8.59608E-06 | 0.008182781 |
| 951.959983 | 376.412154  | 8.4951E-06  | 0.008086993 |
| 951.999983 | 391.454989  | 8.83459E-06 | 0.008410533 |
| 952.039983 | 466.0898    | 1.0519E-05  | 0.010014506 |
| 952.079983 | 571.493882  | 1.28978E-05 | 0.012279757 |
| 952.119983 | 676.679736  | 1.52717E-05 | 0.014540509 |
| 952.159983 | 770.602886  | 1.73914E-05 | 0.016559427 |
| 952.199983 | 823.02939   | 1.85746E-05 | 0.017686759 |
| 952.239983 | 816.717875  | 1.84322E-05 | 0.017551863 |

|            |             |             |             |
|------------|-------------|-------------|-------------|
| 952.279983 | 746.761296  | 1.68534E-05 | 0.01604912  |
| 952.319983 | 669.857058  | 1.51177E-05 | 0.014396927 |
| 952.359983 | 608.090938  | 1.37238E-05 | 0.013069965 |
| 952.399983 | 508.916108  | 1.14855E-05 | 0.010938816 |
| 952.439983 | 431.076658  | 9.7288E-06  | 0.009266098 |
| 952.479983 | 401.060109  | 9.05137E-06 | 0.008621247 |
| 952.519983 | 390.709141  | 8.81776E-06 | 0.008399094 |
| 952.559983 | 386.578014  | 8.72453E-06 | 0.008310636 |
| 952.599983 | 407.235655  | 9.19074E-06 | 0.0087551   |
| 952.639983 | 406.01248   | 9.16314E-06 | 0.00872917  |
| 952.679983 | 403.646072  | 9.10973E-06 | 0.008678657 |
| 952.719983 | 426.32653   | 9.6216E-06  | 0.009166687 |
| 952.759983 | 428.089852  | 9.66139E-06 | 0.009204987 |
| 952.799983 | 410.521823  | 9.26491E-06 | 0.008827602 |
| 952.839983 | 422.497797  | 9.53519E-06 | 0.009085507 |
| 952.879983 | 417.6184    | 9.42507E-06 | 0.008980956 |
| 952.919983 | 438.209394  | 9.88978E-06 | 0.009424165 |
| 952.959983 | 528.869287  | 1.19358E-05 | 0.011374381 |
| 952.999983 | 626.232979  | 1.41332E-05 | 0.013468945 |
| 953.039983 | 726.705324  | 1.64007E-05 | 0.015630549 |
| 953.079983 | 871.667051  | 1.96723E-05 | 0.018749286 |
| 953.119983 | 1014.645386 | 2.28991E-05 | 0.021825621 |
| 953.159983 | 1039.561057 | 2.34614E-05 | 0.022362511 |
| 953.199983 | 1015.502363 | 2.29185E-05 | 0.021845889 |
| 953.239983 | 1003.423476 | 2.26459E-05 | 0.021586949 |
| 953.279983 | 908.992129  | 2.05147E-05 | 0.01955624  |
| 953.319983 | 771.381341  | 1.7409E-05  | 0.01659635  |
| 953.359983 | 641.429857  | 1.44762E-05 | 0.013801009 |
| 953.399983 | 530.03929   | 1.19622E-05 | 0.011404808 |
| 953.439983 | 471.640722  | 1.06443E-05 | 0.010148677 |
| 953.479983 | 415.471575  | 9.37661E-06 | 0.008940414 |
| 953.519983 | 375.040269  | 8.46414E-06 | 0.008070723 |
| 953.559983 | 371.066844  | 8.37446E-06 | 0.007985552 |
| 953.599983 | 376.796336  | 8.50377E-06 | 0.008109193 |
| 953.639983 | 351.650418  | 7.93626E-06 | 0.007568335 |
| 953.679983 | 329.858273  | 7.44444E-06 | 0.007099615 |
| 953.719983 | 344.600146  | 7.77715E-06 | 0.007417219 |
| 953.759983 | 340.819572  | 7.69182E-06 | 0.007336153 |
| 953.799983 | 349.698012  | 7.8922E-06  | 0.007527577 |
| 953.839983 | 368.471921  | 8.3159E-06  | 0.007932036 |
| 953.879983 | 384.397744  | 8.67532E-06 | 0.008275216 |
| 953.919983 | 378.773888  | 8.5484E-06  | 0.008154489 |
| 953.959983 | 363.394713  | 8.20131E-06 | 0.007823724 |
| 953.999983 | 391.151976  | 8.82776E-06 | 0.008421678 |
| 954.039983 | 459.278821  | 1.03653E-05 | 0.009888895 |
| 954.079983 | 577.1453    | 1.30254E-05 | 0.012427241 |

|            |            |             |             |
|------------|------------|-------------|-------------|
| 954.119983 | 722.380005 | 1.63031E-05 | 0.015555124 |
| 954.159983 | 836.087834 | 1.88693E-05 | 0.018004367 |
| 954.199983 | 835.754895 | 1.88618E-05 | 0.017997952 |
| 954.239983 | 823.510848 | 1.85855E-05 | 0.01773502  |
| 954.279983 | 758.630089 | 1.71212E-05 | 0.016338442 |
| 954.319983 | 636.348032 | 1.43615E-05 | 0.013705456 |
| 954.359983 | 570.6992   | 1.28799E-05 | 0.012292048 |
| 954.399983 | 494.201974 | 1.11535E-05 | 0.010644853 |
| 954.439983 | 435.726461 | 9.83374E-06 | 0.009385714 |
| 954.479983 | 389.080859 | 8.78101E-06 | 0.008381301 |
| 954.519983 | 353.848717 | 7.98587E-06 | 0.007622675 |
| 954.559983 | 341.06829  | 7.69744E-06 | 0.007347665 |
| 954.599983 | 361.557081 | 8.15984E-06 | 0.007789383 |
| 954.639983 | 372.763415 | 8.41275E-06 | 0.008031149 |
| 954.679983 | 390.023693 | 8.80229E-06 | 0.008403371 |
| 954.719983 | 411.98084  | 9.29783E-06 | 0.008876828 |
| 954.759983 | 415.289202 | 9.3725E-06  | 0.008948487 |
| 954.799983 | 410.437563 | 9.263E-06   | 0.008844316 |
| 954.839983 | 387.807305 | 8.75227E-06 | 0.008357018 |
| 954.879983 | 383.248169 | 8.64938E-06 | 0.008259117 |
| 954.919983 | 412.406817 | 9.30745E-06 | 0.008887868 |
| 954.959983 | 474.508219 | 1.0709E-05  | 0.010226656 |
| 954.999983 | 557.892841 | 1.25909E-05 | 0.012024275 |
| 955.039983 | 661.194689 | 1.49222E-05 | 0.014251339 |
| 955.079983 | 792.708759 | 1.78903E-05 | 0.017086698 |
| 955.119983 | 915.160779 | 2.06539E-05 | 0.019726957 |
| 955.159983 | 971.247408 | 2.19197E-05 | 0.020936821 |
| 955.199983 | 947.096861 | 2.13747E-05 | 0.020417072 |
| 955.239983 | 888.683453 | 2.00563E-05 | 0.019158625 |
| 955.279983 | 792.715788 | 1.78905E-05 | 0.017090428 |
| 955.319983 | 703.110256 | 1.58682E-05 | 0.015159227 |
| 955.359983 | 613.017856 | 1.3835E-05  | 0.013217366 |
| 955.399983 | 504.870578 | 1.13942E-05 | 0.010886043 |
| 955.439983 | 445.722004 | 1.00593E-05 | 0.009611081 |
| 955.479983 | 436.882454 | 9.85983E-06 | 0.009420869 |
| 955.519983 | 396.754851 | 8.9542E-06  | 0.008555921 |
| 955.559983 | 347.737594 | 7.84795E-06 | 0.00749919  |
| 955.599983 | 335.567392 | 7.57329E-06 | 0.007237034 |
| 955.639983 | 352.452355 | 7.95436E-06 | 0.007601503 |
| 955.679983 | 378.250455 | 8.53659E-06 | 0.008158244 |
| 955.719983 | 388.963275 | 8.77836E-06 | 0.008389653 |
| 955.759983 | 379.469748 | 8.5641E-06  | 0.008185228 |
| 955.799983 | 361.841692 | 8.16626E-06 | 0.007805314 |
| 955.839983 | 355.127149 | 8.01473E-06 | 0.007660795 |
| 955.879983 | 340.161657 | 7.67697E-06 | 0.007338267 |
| 955.919983 | 321.442456 | 7.25451E-06 | 0.00693473  |

|            |            |             |             |
|------------|------------|-------------|-------------|
| 955.959983 | 332.528868 | 7.50471E-06 | 0.007174206 |
| 955.999983 | 399.785896 | 9.02261E-06 | 0.008625616 |
| 956.039983 | 501.7223   | 1.13232E-05 | 0.010825407 |
| 956.079983 | 614.669406 | 1.38722E-05 | 0.013262964 |
| 956.119983 | 655.891022 | 1.48025E-05 | 0.014153011 |
| 956.159983 | 689.450297 | 1.55599E-05 | 0.014877785 |
| 956.199983 | 761.925204 | 1.71956E-05 | 0.016442423 |
| 956.239983 | 781.805633 | 1.76443E-05 | 0.016872151 |
| 956.279983 | 718.310437 | 1.62113E-05 | 0.015502509 |
| 956.319983 | 638.391727 | 1.44076E-05 | 0.013778287 |
| 956.359983 | 587.433693 | 1.32576E-05 | 0.012679    |
| 956.399983 | 509.743235 | 1.15042E-05 | 0.011002612 |
| 956.439983 | 440.391843 | 9.93903E-06 | 0.009506086 |
| 956.479983 | 384.443763 | 8.67636E-06 | 0.008298765 |
| 956.519983 | 340.720989 | 7.6896E-06  | 0.007355254 |
| 956.559983 | 345.89958  | 7.80647E-06 | 0.007467358 |
| 956.599983 | 382.062852 | 8.62263E-06 | 0.008248404 |
| 956.639983 | 392.484623 | 8.85783E-06 | 0.008473756 |
| 956.679983 | 413.915747 | 9.3415E-06  | 0.008936828 |
| 956.719983 | 443.854379 | 1.00172E-05 | 0.009583632 |
| 956.759983 | 468.681055 | 1.05775E-05 | 0.010120108 |
| 956.799983 | 441.410111 | 9.96201E-06 | 0.009531652 |
| 956.839983 | 381.67648  | 8.61391E-06 | 0.00824213  |
| 956.879983 | 366.231412 | 8.26533E-06 | 0.007908932 |
| 956.919983 | 370.841124 | 8.36937E-06 | 0.008008815 |
| 956.959983 | 408.931922 | 9.22902E-06 | 0.008831807 |
| 956.999983 | 460.713131 | 1.03977E-05 | 0.009950554 |
| 957.039983 | 529.310358 | 1.19458E-05 | 0.011432606 |
| 957.079983 | 637.240874 | 1.43816E-05 | 0.013764379 |
| 957.119983 | 757.222021 | 1.70894E-05 | 0.016356651 |
| 957.159983 | 878.052747 | 1.98164E-05 | 0.018967491 |
| 957.199983 | 935.795327 | 2.11196E-05 | 0.020215678 |
| 957.239983 | 914.585657 | 2.06409E-05 | 0.019758318 |
| 957.279983 | 880.402766 | 1.98695E-05 | 0.01902064  |
| 957.319983 | 766.910791 | 1.73081E-05 | 0.016569398 |
| 957.359983 | 609.603    | 1.37579E-05 | 0.013171254 |
| 957.399983 | 473.632544 | 1.06892E-05 | 0.010233866 |
| 957.439983 | 387.655646 | 8.74885E-06 | 0.008376497 |
| 957.479983 | 343.339064 | 7.74868E-06 | 0.00741921  |
| 957.519983 | 344.212702 | 7.7684E-06  | 0.007438399 |
| 957.559983 | 347.24978  | 7.83694E-06 | 0.007504344 |
| 957.599983 | 353.361825 | 7.97488E-06 | 0.007636749 |
| 957.639983 | 351.052187 | 7.92276E-06 | 0.007587151 |
| 957.679983 | 349.337435 | 7.88406E-06 | 0.007550406 |
| 957.719983 | 343.474765 | 7.75175E-06 | 0.007424003 |
| 957.759983 | 319.009547 | 7.1996E-06  | 0.00689549  |



|            |             |             |             |
|------------|-------------|-------------|-------------|
| 957.799983 | 304.259554  | 6.86671E-06 | 0.006576939 |
| 957.839983 | 314.452326  | 7.09675E-06 | 0.006797552 |
| 957.879983 | 326.592673  | 7.37074E-06 | 0.007060286 |
| 957.919983 | 349.267363  | 7.88248E-06 | 0.007550783 |
| 957.959983 | 360.729497  | 8.14116E-06 | 0.007798908 |
| 957.999983 | 375.895557  | 8.48344E-06 | 0.008127135 |
| 958.039983 | 414.561762  | 9.35608E-06 | 0.0089635   |
| 958.079983 | 500.914905  | 1.1305E-05  | 0.010831048 |
| 958.119983 | 606.654114  | 1.36913E-05 | 0.013117945 |
| 958.159983 | 647.882787  | 1.46218E-05 | 0.014010035 |
| 958.199983 | 683.499824  | 1.54256E-05 | 0.014780847 |
| 958.239983 | 719.476031  | 1.62376E-05 | 0.015559491 |
| 958.279983 | 686.909351  | 1.55026E-05 | 0.014855819 |
| 958.319983 | 646.125581  | 1.45822E-05 | 0.01397437  |
| 958.359983 | 577.316702  | 1.30292E-05 | 0.012486696 |
| 958.399983 | 494.093797  | 1.1151E-05  | 0.010687127 |
| 958.439983 | 426.744544  | 9.63103E-06 | 0.009230764 |
| 958.479983 | 411.402859  | 9.28479E-06 | 0.008899285 |
| 958.519983 | 389.469663  | 8.78979E-06 | 0.008425187 |
| 958.559983 | 394.577355  | 8.90506E-06 | 0.008536035 |
| 958.599983 | 402.118332  | 9.07525E-06 | 0.008699535 |
| 958.639983 | 419.870992  | 9.4759E-06  | 0.00908398  |
| 958.679983 | 454.17925   | 1.02502E-05 | 0.009826655 |
| 958.719983 | 484.79559   | 1.09412E-05 | 0.01048951  |
| 958.759983 | 458.074037  | 1.03381E-05 | 0.00991175  |
| 958.799983 | 412.381773  | 9.30688E-06 | 0.008923439 |
| 958.839983 | 417.047586  | 9.41218E-06 | 0.009024777 |
| 958.879983 | 420.091733  | 9.48089E-06 | 0.009091031 |
| 958.919983 | 411.74877   | 9.2926E-06  | 0.008910856 |
| 958.959983 | 441.460987  | 9.96316E-06 | 0.009554271 |
| 958.999983 | 503.352344  | 1.136E-05   | 0.010894203 |
| 959.039983 | 604.016131  | 1.36318E-05 | 0.013073444 |
| 959.079983 | 742.844733  | 1.6765E-05  | 0.016078948 |
| 959.119983 | 884.211156  | 1.99554E-05 | 0.019139637 |
| 959.159983 | 996.14106   | 2.24815E-05 | 0.021563371 |
| 959.199983 | 1013.303482 | 2.28688E-05 | 0.021935799 |
| 959.239983 | 954.047067  | 2.15315E-05 | 0.020653889 |
| 959.279983 | 875.442197  | 1.97575E-05 | 0.018952985 |
| 959.319983 | 764.793484  | 1.72603E-05 | 0.016558173 |
| 959.359983 | 647.059927  | 1.46032E-05 | 0.014009765 |
| 959.399983 | 529.122788  | 1.19416E-05 | 0.011456737 |
| 959.439983 | 391.659555  | 8.83921E-06 | 0.008480692 |
| 959.479983 | 302.169292  | 6.81954E-06 | 0.006543212 |
| 959.519983 | 287.80057   | 6.49526E-06 | 0.00623233  |
| 959.559983 | 302.566521  | 6.8285E-06  | 0.00655236  |
| 959.599983 | 338.393709  | 7.63707E-06 | 0.007328537 |

|            |            |             |             |
|------------|------------|-------------|-------------|
| 959.639983 | 357.396205 | 8.06593E-06 | 0.007740393 |
| 959.679983 | 346.062635 | 7.81015E-06 | 0.007495246 |
| 959.719983 | 337.594821 | 7.61904E-06 | 0.00731215  |
| 959.759983 | 344.913979 | 7.78423E-06 | 0.007470991 |
| 959.799983 | 369.632114 | 8.34208E-06 | 0.00800673  |
| 959.839983 | 365.937604 | 8.2587E-06  | 0.007927032 |
| 959.879983 | 336.534639 | 7.59512E-06 | 0.007290402 |
| 959.919983 | 332.562883 | 7.50548E-06 | 0.007204661 |
| 959.959983 | 339.804258 | 7.66891E-06 | 0.007361846 |
| 959.999983 | 355.849846 | 8.03104E-06 | 0.007709794 |
| 960.039983 | 387.265101 | 8.74003E-06 | 0.008390782 |
| 960.079983 | 490.035846 | 1.10594E-05 | 0.010617934 |
| 960.119983 | 619.346    | 1.39778E-05 | 0.013420343 |
| 960.159983 | 677.275229 | 1.52852E-05 | 0.014676198 |
| 960.199983 | 708.840222 | 1.59975E-05 | 0.015360834 |
| 960.239983 | 696.992944 | 1.57302E-05 | 0.015104728 |
| 960.279983 | 636.607712 | 1.43673E-05 | 0.013796678 |
| 960.319983 | 565.738898 | 1.27679E-05 | 0.012261307 |
| 960.359983 | 514.772766 | 1.16177E-05 | 0.011157178 |
| 960.399983 | 458.283289 | 1.03428E-05 | 0.00993324  |
| 960.439983 | 422.332992 | 9.53147E-06 | 0.009154402 |
| 960.479983 | 447.766842 | 1.01055E-05 | 0.009706105 |
| 960.519983 | 508.985668 | 1.14871E-05 | 0.011033587 |
| 960.559983 | 508.712882 | 1.14809E-05 | 0.011028133 |
| 960.599983 | 488.572626 | 1.10264E-05 | 0.010591963 |
| 960.639983 | 467.430937 | 1.05493E-05 | 0.010134046 |
| 960.679983 | 433.318078 | 9.77939E-06 | 0.00939486  |
| 960.719983 | 403.279396 | 9.10145E-06 | 0.008743949 |
| 960.759983 | 360.509555 | 8.1362E-06  | 0.007816934 |
| 960.799983 | 338.58575  | 7.64141E-06 | 0.007341865 |
| 960.839983 | 355.646326 | 8.02644E-06 | 0.007712127 |
| 960.879983 | 376.103321 | 8.48813E-06 | 0.008156072 |
| 960.919983 | 409.061466 | 9.23195E-06 | 0.008871163 |
| 960.959983 | 438.314801 | 9.89215E-06 | 0.009505965 |
| 960.999983 | 461.350478 | 1.0412E-05  | 0.010005968 |
| 961.039983 | 513.416121 | 1.15871E-05 | 0.011135654 |
| 961.079983 | 607.623194 | 1.37132E-05 | 0.013179491 |
| 961.119983 | 737.69989  | 1.66489E-05 | 0.016001551 |
| 961.159983 | 829.334165 | 1.87169E-05 | 0.017989952 |
| 961.199983 | 825.905645 | 1.86395E-05 | 0.017916326 |
| 961.239983 | 803.449341 | 1.81327E-05 | 0.017429907 |
| 961.279983 | 780.390582 | 1.76123E-05 | 0.016930379 |
| 961.319983 | 701.054889 | 1.58218E-05 | 0.015209844 |
| 961.359983 | 593.830183 | 1.34019E-05 | 0.01288407  |
| 961.399983 | 493.803011 | 1.11444E-05 | 0.01071427  |
| 961.439983 | 428.343393 | 9.66711E-06 | 0.00929435  |

|            |             |             |             |
|------------|-------------|-------------|-------------|
| 961.479983 | 393.891039  | 8.88957E-06 | 0.008547146 |
| 961.519983 | 372.067014  | 8.39703E-06 | 0.008073916 |
| 961.559983 | 336.100139  | 7.58531E-06 | 0.007293732 |
| 961.599983 | 325.790673  | 7.35264E-06 | 0.0070703   |
| 961.639983 | 344.853278  | 7.78286E-06 | 0.007484308 |
| 961.679983 | 348.956674  | 7.87547E-06 | 0.007573678 |
| 961.719983 | 356.927035  | 8.05535E-06 | 0.007746987 |
| 961.759983 | 343.252566  | 7.74673E-06 | 0.007450497 |
| 961.799983 | 316.900392  | 7.152E-06   | 0.006878794 |
| 961.839983 | 314.22085   | 7.09153E-06 | 0.006820914 |
| 961.879983 | 302.911678  | 6.83629E-06 | 0.006575695 |
| 961.919983 | 301.166584  | 6.79691E-06 | 0.006538084 |
| 961.959983 | 337.89959   | 7.62592E-06 | 0.007335833 |
| 961.999983 | 394.711559  | 8.90809E-06 | 0.008569583 |
| 962.039983 | 470.102253  | 1.06096E-05 | 0.010206814 |
| 962.079983 | 536.763055  | 1.2114E-05  | 0.011654632 |
| 962.119983 | 570.123472  | 1.28669E-05 | 0.012379495 |
| 962.159983 | 609.20488   | 1.37489E-05 | 0.013228647 |
| 962.199983 | 633.656711  | 1.43007E-05 | 0.013760181 |
| 962.239983 | 667.626339  | 1.50674E-05 | 0.014498451 |
| 962.279983 | 683.291249  | 1.54209E-05 | 0.014839254 |
| 962.319983 | 623.284001  | 1.40667E-05 | 0.01353662  |
| 962.359983 | 539.803006  | 1.21826E-05 | 0.011724049 |
| 962.399983 | 485.796439  | 1.09637E-05 | 0.010551512 |
| 962.439983 | 419.964306  | 9.47801E-06 | 0.009122015 |
| 962.479983 | 366.10295   | 8.26243E-06 | 0.007952427 |
| 962.519983 | 333.560316  | 7.52799E-06 | 0.007245842 |
| 962.559983 | 331.239511  | 7.47561E-06 | 0.007195727 |
| 962.599983 | 339.347155  | 7.65859E-06 | 0.007372161 |
| 962.639983 | 348.743857  | 7.87066E-06 | 0.007576615 |
| 962.679983 | 354.171704  | 7.99316E-06 | 0.007694857 |
| 962.719983 | 374.687881  | 8.45618E-06 | 0.008140937 |
| 962.759983 | 384.10336   | 8.66868E-06 | 0.008345856 |
| 962.799983 | 388.435774  | 8.76645E-06 | 0.008440342 |
| 962.839983 | 404.660295  | 9.13262E-06 | 0.008793251 |
| 962.879983 | 406.167499  | 9.16663E-06 | 0.008826369 |
| 962.919983 | 407.029265  | 9.18608E-06 | 0.008845463 |
| 962.959983 | 458.119917  | 1.03391E-05 | 0.009956167 |
| 962.999983 | 543.06776   | 1.22563E-05 | 0.0118028   |
| 963.039983 | 634.574977  | 1.43215E-05 | 0.013792151 |
| 963.079983 | 714.481899  | 1.61249E-05 | 0.015529531 |
| 963.119983 | 862.838462  | 1.94731E-05 | 0.018754895 |
| 963.159983 | 1000.751211 | 2.25856E-05 | 0.021753508 |
| 963.199983 | 991.289016  | 2.2372E-05  | 0.021548722 |
| 963.239983 | 891.301811  | 2.01154E-05 | 0.019375996 |
| 963.279983 | 793.30483   | 1.79038E-05 | 0.017246358 |

|            |            |             |             |
|------------|------------|-------------|-------------|
| 963.319983 | 717.657023 | 1.61965E-05 | 0.015602431 |
| 963.359983 | 601.116797 | 1.35664E-05 | 0.013069297 |
| 963.399983 | 472.169196 | 1.06562E-05 | 0.010266184 |
| 963.439983 | 396.119431 | 8.93986E-06 | 0.008613022 |
| 963.479983 | 342.425763 | 7.72807E-06 | 0.007445843 |
| 963.519983 | 297.481505 | 6.71374E-06 | 0.006468826 |
| 963.559983 | 273.000293 | 6.16124E-06 | 0.005936721 |
| 963.599983 | 275.964462 | 6.22813E-06 | 0.006001429 |
| 963.639983 | 305.462954 | 6.89387E-06 | 0.006643212 |
| 963.679983 | 324.140675 | 7.3154E-06  | 0.007049708 |
| 963.719983 | 308.899225 | 6.97143E-06 | 0.006718502 |
| 963.759983 | 318.713304 | 7.19292E-06 | 0.006932244 |
| 963.799983 | 337.84739  | 7.62475E-06 | 0.007348729 |
| 963.839983 | 327.585694 | 7.39315E-06 | 0.007125816 |
| 963.879983 | 313.186798 | 7.06819E-06 | 0.006812887 |
| 963.919983 | 318.080699 | 7.17864E-06 | 0.006919633 |
| 963.959983 | 328.163951 | 7.4062E-06  | 0.007139284 |
| 963.999983 | 366.924017 | 8.28096E-06 | 0.007982849 |
| 964.039983 | 479.277631 | 1.08166E-05 | 0.010427662 |
| 964.079983 | 599.04253  | 1.35196E-05 | 0.013033933 |
| 964.119983 | 672.157952 | 1.51697E-05 | 0.014625381 |
| 964.159983 | 730.763322 | 1.64923E-05 | 0.015901226 |
| 964.199983 | 791.183429 | 1.78559E-05 | 0.017216666 |
| 964.239983 | 824.398755 | 1.86055E-05 | 0.017940197 |
| 964.279983 | 768.760452 | 1.73499E-05 | 0.016730116 |
| 964.319983 | 649.409463 | 1.46563E-05 | 0.014133331 |
| 964.359983 | 525.423921 | 1.18581E-05 | 0.011435464 |
| 964.399983 | 419.411325 | 9.46553E-06 | 0.009128556 |
| 964.439983 | 352.978165 | 7.96623E-06 | 0.007682946 |
| 964.479983 | 330.982943 | 7.46982E-06 | 0.007204496 |
| 964.519983 | 305.877963 | 6.90324E-06 | 0.006658313 |
| 964.559983 | 321.855776 | 7.26384E-06 | 0.007006406 |
| 964.599983 | 345.472239 | 7.79683E-06 | 0.007520819 |
| 964.639983 | 347.421727 | 7.84082E-06 | 0.007563573 |
| 964.679983 | 358.534793 | 8.09163E-06 | 0.007805834 |
| 964.719983 | 394.2699   | 8.89812E-06 | 0.008584197 |
| 964.759983 | 415.339565 | 9.37364E-06 | 0.009043308 |
| 964.799983 | 401.451918 | 9.06021E-06 | 0.008741291 |
| 964.839983 | 386.035572 | 8.71229E-06 | 0.008405961 |
| 964.879983 | 391.447526 | 8.83443E-06 | 0.00852416  |
| 964.919983 | 429.566226 | 9.69471E-06 | 0.009354621 |
| 964.959983 | 472.411711 | 1.06617E-05 | 0.010288089 |
| 964.999983 | 516.710939 | 1.16614E-05 | 0.011253295 |
| 965.039983 | 646.447258 | 1.45894E-05 | 0.014079368 |
| 965.079983 | 816.065463 | 1.84175E-05 | 0.017774323 |
| 965.119983 | 930.028275 | 2.09894E-05 | 0.020257331 |

|            |             |             |             |
|------------|-------------|-------------|-------------|
| 965.159983 | 1026.510064 | 2.31669E-05 | 0.022359767 |
| 965.199983 | 1078.186532 | 2.43332E-05 | 0.023486374 |
| 965.239983 | 1015.836975 | 2.2926E-05  | 0.022129117 |
| 965.279983 | 913.82112   | 2.06237E-05 | 0.019907616 |
| 965.319983 | 827.326559  | 1.86716E-05 | 0.018024076 |
| 965.359983 | 740.637782  | 1.67152E-05 | 0.01613615  |
| 965.399983 | 631.530621  | 1.42528E-05 | 0.013759621 |
| 965.439983 | 582.743126  | 1.31517E-05 | 0.012697178 |
| 965.479983 | 584.878929  | 1.31999E-05 | 0.012744242 |
| 965.519983 | 567.223525  | 1.28014E-05 | 0.012360051 |
| 965.559983 | 536.408942  | 1.2106E-05  | 0.011689072 |
| 965.599983 | 533.279634  | 1.20354E-05 | 0.011621361 |
| 965.639983 | 497.519363  | 1.12283E-05 | 0.010842514 |
| 965.679983 | 442.066529  | 9.97683E-06 | 0.009634421 |
| 965.719983 | 379.367974  | 8.56181E-06 | 0.008268308 |
| 965.759983 | 348.1115    | 7.85639E-06 | 0.007587389 |
| 965.799983 | 342.004693  | 7.71857E-06 | 0.007454594 |
| 965.839983 | 320.601388  | 7.23553E-06 | 0.006988361 |
| 965.879983 | 291.209009  | 6.57218E-06 | 0.006347939 |
| 965.919983 | 293.274972  | 6.61881E-06 | 0.006393239 |
| 965.959983 | 357.639535  | 8.07143E-06 | 0.007796675 |
| 965.999983 | 428.485675  | 9.67032E-06 | 0.009341534 |
| 966.039983 | 477.719435  | 1.07815E-05 | 0.010415324 |
| 966.079983 | 562.568449  | 1.26964E-05 | 0.012265725 |
| 966.119983 | 665.312256  | 1.50152E-05 | 0.014506457 |
| 966.159983 | 745.275831  | 1.68198E-05 | 0.016250654 |
| 966.199983 | 768.397381  | 1.73417E-05 | 0.01675551  |
| 966.239983 | 742.097294  | 1.67481E-05 | 0.016182686 |
| 966.279983 | 712.184222  | 1.6073E-05  | 0.015531024 |
| 966.319983 | 634.603104  | 1.43221E-05 | 0.013839739 |
| 966.359983 | 520.013401  | 1.1736E-05  | 0.01134118  |
| 966.399983 | 472.685972  | 1.06679E-05 | 0.010309424 |
| 966.439983 | 466.505693  | 1.05284E-05 | 0.010175051 |
| 966.479983 | 471.094846  | 1.0632E-05  | 0.010275571 |
| 966.519983 | 470.473186  | 1.06179E-05 | 0.010262436 |
| 966.559983 | 467.541656  | 1.05518E-05 | 0.010198913 |
| 966.599983 | 481.793651  | 1.08734E-05 | 0.010510239 |
| 966.639983 | 479.035245  | 1.08112E-05 | 0.010450498 |
| 966.679983 | 463.974093  | 1.04712E-05 | 0.010122347 |
| 966.719983 | 452.44859   | 1.02111E-05 | 0.009871308 |
| 966.759983 | 423.791689  | 9.56439E-06 | 0.009246468 |
| 966.799983 | 400.951679  | 9.04892E-06 | 0.008748497 |
| 966.839983 | 405.667772  | 9.15536E-06 | 0.008851765 |
| 966.879983 | 428.029592  | 9.66003E-06 | 0.009340091 |
| 966.919983 | 463.597922  | 1.04628E-05 | 0.010116651 |
| 966.959983 | 547.40026   | 1.23541E-05 | 0.011945883 |

|            |             |             |             |
|------------|-------------|-------------|-------------|
| 966.999983 | 645.028575  | 1.45574E-05 | 0.014077002 |
| 967.039983 | 763.622452  | 1.72339E-05 | 0.016665866 |
| 967.079983 | 917.162546  | 2.06991E-05 | 0.020017667 |
| 967.119983 | 1062.741088 | 2.39846E-05 | 0.023195972 |
| 967.159983 | 1165.951503 | 2.63139E-05 | 0.025449752 |
| 967.199983 | 1185.056811 | 2.67451E-05 | 0.025867842 |
| 967.239983 | 1149.154065 | 2.59348E-05 | 0.025085182 |
| 967.279983 | 1072.991794 | 2.42159E-05 | 0.023423585 |
| 967.319983 | 933.149394  | 2.10599E-05 | 0.020371645 |
| 967.359983 | 766.13094   | 1.72905E-05 | 0.016726146 |
| 967.399983 | 610.546652  | 1.37792E-05 | 0.013329986 |
| 967.439983 | 523.400286  | 1.18124E-05 | 0.011427803 |
| 967.479983 | 462.005022  | 1.04268E-05 | 0.01008773  |
| 967.519983 | 413.453901  | 9.33108E-06 | 0.009028005 |
| 967.559983 | 383.256562  | 8.64957E-06 | 0.008368975 |
| 967.599983 | 374.287961  | 8.44716E-06 | 0.00817347  |
| 967.639983 | 364.819171  | 8.23346E-06 | 0.007967026 |
| 967.679983 | 355.520922  | 8.02361E-06 | 0.007764289 |
| 967.719983 | 359.516467  | 8.11379E-06 | 0.007851873 |
| 967.759983 | 347.258023  | 7.83713E-06 | 0.007584461 |
| 967.799983 | 349.118603  | 7.87912E-06 | 0.007625413 |
| 967.839983 | 361.715444  | 8.16341E-06 | 0.007900878 |
| 967.879983 | 383.565685  | 8.65654E-06 | 0.008378495 |
| 967.919983 | 380.905611  | 8.59651E-06 | 0.008320733 |
| 967.959983 | 395.6502    | 8.92927E-06 | 0.00864318  |
| 967.999983 | 436.635167  | 9.85425E-06 | 0.009538911 |
| 968.039983 | 487.150759  | 1.09943E-05 | 0.010642936 |
| 968.079983 | 592.979363  | 1.33827E-05 | 0.012955542 |
| 968.119983 | 687.234608  | 1.55099E-05 | 0.015015471 |
| 968.159983 | 778.721619  | 1.75747E-05 | 0.017015085 |
| 968.199983 | 875.860878  | 1.9767E-05  | 0.01913837  |
| 968.239983 | 902.287734  | 2.03634E-05 | 0.019716636 |
| 968.279983 | 880.833039  | 1.98792E-05 | 0.019248607 |
| 968.319983 | 789.735844  | 1.78232E-05 | 0.017258598 |
| 968.359983 | 634.202664  | 1.43131E-05 | 0.013860205 |
| 968.399983 | 507.006169  | 1.14424E-05 | 0.011080842 |
| 968.439983 | 427.833862  | 9.65561E-06 | 0.009350883 |
| 968.479983 | 346.543831  | 7.82101E-06 | 0.007574493 |
| 968.519983 | 321.414649  | 7.25388E-06 | 0.007025529 |
| 968.559983 | 351.505886  | 7.933E-06   | 0.007683585 |
| 968.599983 | 368.206941  | 8.30992E-06 | 0.008048986 |
| 968.639983 | 379.127283  | 8.55637E-06 | 0.008288047 |
| 968.679983 | 375.555995  | 8.47578E-06 | 0.008210314 |
| 968.719983 | 370.817036  | 8.36882E-06 | 0.008107047 |
| 968.759983 | 382.065796  | 8.62269E-06 | 0.00835332  |
| 968.799983 | 400.32155   | 9.0347E-06  | 0.008752817 |

|            |             |             |             |
|------------|-------------|-------------|-------------|
| 968.839983 | 395.858917  | 8.93398E-06 | 0.008655601 |
| 968.879983 | 416.562727  | 9.40124E-06 | 0.009108674 |
| 968.919983 | 456.274961  | 1.02975E-05 | 0.009977444 |
| 968.959983 | 482.227648  | 1.08832E-05 | 0.010545391 |
| 968.999983 | 521.275778  | 1.17645E-05 | 0.01139977  |
| 969.039983 | 622.672464  | 1.40529E-05 | 0.013617774 |
| 969.079983 | 785.228473  | 1.77215E-05 | 0.017173563 |
| 969.119983 | 922.157067  | 2.08118E-05 | 0.020169132 |
| 969.159983 | 1020.79552  | 2.30379E-05 | 0.022327443 |
| 969.199983 | 1056.856584 | 2.38518E-05 | 0.023117146 |
| 969.239983 | 1020.686826 | 2.30355E-05 | 0.022326908 |
| 969.279983 | 934.3098    | 2.10861E-05 | 0.020438306 |
| 969.319983 | 834.790954  | 1.88401E-05 | 0.018262055 |
| 969.359983 | 693.292105  | 1.56466E-05 | 0.015167224 |
| 969.399983 | 511.378762  | 1.15411E-05 | 0.011187948 |
| 969.439983 | 393.579187  | 8.88253E-06 | 0.008611084 |
| 969.479983 | 342.151     | 7.72187E-06 | 0.0074862   |
| 969.519983 | 343.972844  | 7.76299E-06 | 0.007526372 |
| 969.559983 | 352.065628  | 7.94563E-06 | 0.007703766 |
| 969.599983 | 332.356402  | 7.50082E-06 | 0.007272796 |
| 969.639983 | 322.218265  | 7.27202E-06 | 0.007051239 |
| 969.679983 | 329.480842  | 7.43592E-06 | 0.007210466 |
| 969.719983 | 336.470726  | 7.59368E-06 | 0.007363739 |
| 969.759983 | 359.62905   | 8.11633E-06 | 0.007870889 |
| 969.799983 | 366.865077  | 8.27963E-06 | 0.008029589 |
| 969.839983 | 348.316085  | 7.86101E-06 | 0.007623921 |
| 969.879983 | 340.070912  | 7.67493E-06 | 0.007443758 |
| 969.919983 | 353.406683  | 7.9759E-06  | 0.007735981 |
| 969.959983 | 368.119456  | 8.30794E-06 | 0.008058373 |
| 969.999983 | 384.136635  | 8.66943E-06 | 0.008409346 |
| 970.039983 | 426.063795  | 9.61567E-06 | 0.009327581 |
| 970.079983 | 502.524594  | 1.13413E-05 | 0.011001949 |
| 970.119983 | 602.631146  | 1.36005E-05 | 0.013194161 |
| 970.159983 | 684.093603  | 1.5439E-05  | 0.014978339 |
| 970.199983 | 728.393397  | 1.64388E-05 | 0.015948947 |
| 970.239983 | 730.305898  | 1.6482E-05  | 0.015991483 |
| 970.279983 | 685.870053  | 1.54791E-05 | 0.015019092 |
| 970.319983 | 617.265695  | 1.39308E-05 | 0.01351736  |
| 970.359983 | 540.224105  | 1.21921E-05 | 0.011830731 |
| 970.399983 | 459.317146  | 1.03661E-05 | 0.01005931  |
| 970.439983 | 385.054128  | 8.69014E-06 | 0.008433255 |
| 970.479983 | 326.993985  | 7.3798E-06  | 0.007161947 |
| 970.519983 | 313.334375  | 7.07152E-06 | 0.006863052 |
| 970.559983 | 336.05904   | 7.58438E-06 | 0.0073611   |
| 970.599983 | 361.563103  | 8.15998E-06 | 0.007920072 |
| 970.639983 | 366.455831  | 8.2704E-06  | 0.008027579 |

|            |            |             |             |
|------------|------------|-------------|-------------|
| 970.679983 | 365.778029 | 8.2551E-06  | 0.008013061 |
| 970.719983 | 373.862465 | 8.43756E-06 | 0.008190503 |
| 970.759983 | 376.063198 | 8.48722E-06 | 0.008239056 |
| 970.799983 | 376.033258 | 8.48655E-06 | 0.00823874  |
| 970.839983 | 386.261451 | 8.71738E-06 | 0.008463184 |
| 970.879983 | 381.375661 | 8.60712E-06 | 0.008356478 |
| 970.919983 | 377.667855 | 8.52344E-06 | 0.008275576 |
| 970.959983 | 416.626248 | 9.40267E-06 | 0.00912962  |
| 970.999983 | 482.231991 | 1.08833E-05 | 0.010567688 |
| 971.039983 | 540.542534 | 1.21993E-05 | 0.011846    |
| 971.079983 | 655.036758 | 1.47833E-05 | 0.014355735 |
| 971.119983 | 803.258362 | 1.81284E-05 | 0.017604873 |
| 971.159983 | 888.211519 | 2.00457E-05 | 0.019467579 |
| 971.199983 | 921.751761 | 2.08027E-05 | 0.020203537 |
| 971.239983 | 922.49083  | 2.08193E-05 | 0.020220569 |
| 971.279983 | 900.2934   | 2.03184E-05 | 0.019734824 |
| 971.319983 | 797.109981 | 1.79897E-05 | 0.017473718 |
| 971.359983 | 657.30449  | 1.48344E-05 | 0.014409588 |
| 971.399983 | 562.226631 | 1.26887E-05 | 0.012325776 |
| 971.439983 | 480.858069 | 1.08523E-05 | 0.010542355 |
| 971.479983 | 431.275916 | 9.7333E-06  | 0.009455703 |
| 971.519983 | 352.798367 | 7.96217E-06 | 0.007735405 |
| 971.559983 | 309.805785 | 6.99189E-06 | 0.006793036 |
| 971.599983 | 309.585311 | 6.98691E-06 | 0.006788481 |
| 971.639983 | 312.948379 | 7.06281E-06 | 0.006862508 |
| 971.679983 | 324.215864 | 7.3171E-06  | 0.00710988  |
| 971.719983 | 349.787496 | 7.89422E-06 | 0.007670968 |
| 971.759983 | 367.479301 | 8.2935E-06  | 0.008059288 |
| 971.799983 | 357.535344 | 8.06907E-06 | 0.007841527 |
| 971.839983 | 331.233956 | 7.47549E-06 | 0.007264979 |
| 971.879983 | 286.435293 | 6.46445E-06 | 0.006282665 |
| 971.919983 | 281.098494 | 6.344E-06   | 0.006165862 |
| 971.959983 | 312.79772  | 7.05941E-06 | 0.006861463 |
| 971.999983 | 398.699511 | 8.99809E-06 | 0.008746146 |
| 972.039983 | 501.520835 | 1.13186E-05 | 0.011002158 |
| 972.079983 | 574.563624 | 1.29671E-05 | 0.012605059 |
| 972.119983 | 664.468612 | 1.49961E-05 | 0.014578039 |
| 972.159983 | 687.098557 | 1.55069E-05 | 0.015075146 |
| 972.199983 | 671.302051 | 1.51504E-05 | 0.014729172 |
| 972.239983 | 673.032599 | 1.51894E-05 | 0.01476775  |
| 972.279983 | 645.517352 | 1.45684E-05 | 0.01416459  |
| 972.319983 | 605.042281 | 1.3655E-05  | 0.013276992 |
| 972.359983 | 577.907567 | 1.30426E-05 | 0.012682072 |
| 972.399983 | 504.223545 | 1.13796E-05 | 0.011065545 |
| 972.439983 | 417.03487  | 9.4119E-06  | 0.009152504 |
| 972.479983 | 373.131345 | 8.42105E-06 | 0.008189307 |



|            |             |             |             |
|------------|-------------|-------------|-------------|
| 972.519983 | 348.26263   | 7.8598E-06  | 0.007643815 |
| 972.559983 | 343.998693  | 7.76357E-06 | 0.007550539 |
| 972.599983 | 335.205835  | 7.56513E-06 | 0.007357844 |
| 972.639983 | 315.002716  | 7.10917E-06 | 0.006914665 |
| 972.679983 | 331.312828  | 7.47727E-06 | 0.00727299  |
| 972.719983 | 371.578097  | 8.386E-06   | 0.00815723  |
| 972.759983 | 375.56515   | 8.47598E-06 | 0.008245096 |
| 972.799983 | 344.831495  | 7.78237E-06 | 0.007570686 |
| 972.839983 | 351.706244  | 7.93752E-06 | 0.007721937 |
| 972.879983 | 405.141549  | 9.14348E-06 | 0.008895509 |
| 972.919983 | 459.680239  | 1.03743E-05 | 0.010093405 |
| 972.959983 | 488.855806  | 1.10328E-05 | 0.010734468 |
| 972.999983 | 537.07416   | 1.2121E-05  | 0.011793748 |
| 973.039983 | 670.793381  | 1.51389E-05 | 0.014730728 |
| 973.079983 | 821.56191   | 1.85415E-05 | 0.01804237  |
| 973.119983 | 929.960438  | 2.09879E-05 | 0.020423756 |
| 973.159983 | 1044.97046  | 2.35835E-05 | 0.022950545 |
| 973.199983 | 1168.664468 | 2.63751E-05 | 0.025668275 |
| 973.239983 | 1221.744652 | 2.75731E-05 | 0.026835219 |
| 973.279983 | 1162.509495 | 2.62362E-05 | 0.025535188 |
| 973.319983 | 972.759342  | 2.19538E-05 | 0.021368095 |
| 973.359983 | 785.562761  | 1.77291E-05 | 0.017256755 |
| 973.399983 | 626.328579  | 1.41354E-05 | 0.013759363 |
| 973.439983 | 473.12495   | 1.06778E-05 | 0.010394169 |
| 973.479983 | 400.32801   | 9.03485E-06 | 0.008795241 |
| 973.519983 | 388.803371  | 8.77475E-06 | 0.008542395 |
| 973.559983 | 366.7173    | 8.2763E-06  | 0.008057473 |
| 973.599983 | 331.32583   | 7.47756E-06 | 0.007280155 |
| 973.639983 | 312.648022  | 7.05603E-06 | 0.006870033 |
| 973.679983 | 310.495292  | 7.00745E-06 | 0.00682301  |
| 973.719983 | 323.16462   | 7.29338E-06 | 0.007101705 |
| 973.759983 | 357.370824  | 8.06536E-06 | 0.007853726 |
| 973.799983 | 369.139713  | 8.33097E-06 | 0.008112698 |
| 973.839983 | 367.414857  | 8.29204E-06 | 0.008075122 |
| 973.879983 | 379.727099  | 8.56991E-06 | 0.008346065 |
| 973.919983 | 377.001709  | 8.5084E-06  | 0.008286504 |
| 973.959983 | 383.890383  | 8.66387E-06 | 0.008438264 |
| 973.999983 | 406.526671  | 9.17474E-06 | 0.008936197 |
| 974.039983 | 439.128689  | 9.91052E-06 | 0.009653246 |
| 974.079983 | 513.05889   | 1.1579E-05  | 0.011278896 |
| 974.119983 | 642.482689  | 1.44999E-05 | 0.014124681 |
| 974.159983 | 756.712112  | 1.70779E-05 | 0.016636644 |
| 974.199983 | 862.630234  | 1.94684E-05 | 0.018966079 |
| 974.239983 | 908.843736  | 2.05113E-05 | 0.019982965 |
| 974.279983 | 845.515057  | 1.90821E-05 | 0.018591305 |
| 974.319983 | 721.982955  | 1.62941E-05 | 0.015875716 |

|            |            |             |             |
|------------|------------|-------------|-------------|
| 974.359983 | 595.440592 | 1.34383E-05 | 0.013093707 |
| 974.399983 | 496.761411 | 1.12112E-05 | 0.010924206 |
| 974.439983 | 427.603192 | 9.65041E-06 | 0.009403744 |
| 974.479983 | 373.203444 | 8.42268E-06 | 0.008207735 |
| 974.519983 | 340.794466 | 7.69126E-06 | 0.007495283 |
| 974.559983 | 366.193559 | 8.26448E-06 | 0.00805423  |
| 974.599983 | 384.811306 | 8.68466E-06 | 0.008464065 |
| 974.639983 | 340.623192 | 7.68739E-06 | 0.007492439 |
| 974.679983 | 320.626134 | 7.23609E-06 | 0.007052867 |
| 974.719983 | 347.536456 | 7.84341E-06 | 0.007645132 |
| 974.759983 | 371.540717 | 8.38516E-06 | 0.008173515 |
| 974.799983 | 375.548385 | 8.4756E-06  | 0.008262019 |
| 974.839983 | 356.990026 | 8.05677E-06 | 0.007854059 |
| 974.879983 | 367.51896  | 8.29439E-06 | 0.008086036 |
| 974.919983 | 402.864306 | 9.09209E-06 | 0.008864057 |
| 974.959983 | 459.714358 | 1.03751E-05 | 0.01011532  |
| 974.999983 | 490.839011 | 1.10776E-05 | 0.010800614 |
| 975.039983 | 529.879076 | 1.19586E-05 | 0.011660145 |
| 975.079983 | 620.142491 | 1.39958E-05 | 0.013646978 |
| 975.119983 | 725.907668 | 1.63827E-05 | 0.015975122 |
| 975.159983 | 838.734139 | 1.89291E-05 | 0.018458863 |
| 975.199983 | 952.552046 | 2.14978E-05 | 0.020964628 |
| 975.239983 | 960.874918 | 2.16856E-05 | 0.021148672 |
| 975.279983 | 902.012146 | 2.03572E-05 | 0.019853928 |
| 975.319983 | 775.452688 | 1.75009E-05 | 0.017068965 |
| 975.359983 | 648.305842 | 1.46314E-05 | 0.014270843 |
| 975.399983 | 544.370453 | 1.22857E-05 | 0.011983455 |
| 975.439983 | 441.021806 | 9.95325E-06 | 0.009708796 |
| 975.479983 | 378.441065 | 8.54089E-06 | 0.008331465 |
| 975.519983 | 335.551676 | 7.57293E-06 | 0.007387548 |
| 975.559983 | 283.130401 | 6.38986E-06 | 0.006233691 |
| 975.599983 | 258.972294 | 5.84464E-06 | 0.005702035 |
| 975.639983 | 288.434604 | 6.50957E-06 | 0.006350994 |
| 975.679983 | 324.696246 | 7.32794E-06 | 0.007149726 |
| 975.719983 | 348.011813 | 7.85414E-06 | 0.007663443 |
| 975.759983 | 339.08428  | 7.65266E-06 | 0.007467159 |
| 975.799983 | 330.576485 | 7.46065E-06 | 0.007280103 |
| 975.839983 | 341.867303 | 7.71547E-06 | 0.007529063 |
| 975.879983 | 316.830146 | 7.15042E-06 | 0.006977947 |
| 975.919983 | 280.862236 | 6.33867E-06 | 0.006186034 |
| 975.959983 | 281.491646 | 6.35287E-06 | 0.006200151 |
| 975.999983 | 339.053468 | 7.65196E-06 | 0.007468317 |
| 976.039983 | 430.129626 | 9.70743E-06 | 0.009474836 |
| 976.079983 | 503.96681  | 1.13738E-05 | 0.011101767 |
| 976.119983 | 578.902389 | 1.3065E-05  | 0.012753028 |
| 976.159983 | 640.169777 | 1.44477E-05 | 0.014103306 |

|            |            |             |             |
|------------|------------|-------------|-------------|
| 976.199983 | 687.100601 | 1.55069E-05 | 0.015137839 |
| 976.239983 | 685.918414 | 1.54802E-05 | 0.015112413 |
| 976.279983 | 657.816876 | 1.4846E-05  | 0.014493863 |
| 976.319983 | 602.773139 | 1.36038E-05 | 0.013281613 |
| 976.359983 | 515.722995 | 1.16391E-05 | 0.011364    |
| 976.399983 | 414.693096 | 9.35905E-06 | 0.009138172 |
| 976.439983 | 326.739007 | 7.37404E-06 | 0.007200312 |
| 976.479983 | 294.563301 | 6.64788E-06 | 0.006491525 |
| 976.519983 | 292.143359 | 6.59327E-06 | 0.006438459 |
| 976.559983 | 318.946487 | 7.19818E-06 | 0.007029453 |
| 976.599983 | 342.3224   | 7.72574E-06 | 0.007544957 |
| 976.639983 | 357.361007 | 8.06514E-06 | 0.007876738 |
| 976.679983 | 371.988414 | 8.39526E-06 | 0.008199483 |
| 976.719983 | 388.492262 | 8.76773E-06 | 0.008563616 |
| 976.759983 | 386.641278 | 8.72596E-06 | 0.008523164 |
| 976.799983 | 346.042218 | 7.80969E-06 | 0.007628506 |
| 976.839983 | 346.217305 | 7.81364E-06 | 0.007632678 |
| 976.879983 | 356.789945 | 8.05225E-06 | 0.007866084 |
| 976.919983 | 370.508706 | 8.36187E-06 | 0.008168873 |
| 976.959983 | 415.332065 | 9.37347E-06 | 0.009157501 |
| 976.999983 | 463.255813 | 1.0455E-05  | 0.010214572 |
| 977.039983 | 528.499462 | 1.19275E-05 | 0.011653641 |
| 977.079983 | 604.499318 | 1.36427E-05 | 0.013330017 |
| 977.119983 | 690.580716 | 1.55854E-05 | 0.01522885  |
| 977.159983 | 782.032957 | 1.76494E-05 | 0.017246282 |
| 977.199983 | 855.088213 | 1.92981E-05 | 0.018858152 |
| 977.239983 | 871.231819 | 1.96625E-05 | 0.01921497  |
| 977.279983 | 819.726439 | 1.85001E-05 | 0.018079762 |
| 977.319983 | 720.332356 | 1.62569E-05 | 0.015888191 |
| 977.359983 | 602.860934 | 1.36057E-05 | 0.013297698 |
| 977.399983 | 487.882146 | 1.10108E-05 | 0.010761976 |
| 977.439983 | 401.39152  | 9.05885E-06 | 0.00885448  |
| 977.479983 | 336.476267 | 7.5938E-06  | 0.007422788 |
| 977.519983 | 295.867558 | 6.67732E-06 | 0.006527212 |
| 977.559983 | 294.703184 | 6.65104E-06 | 0.006501791 |
| 977.599983 | 305.823755 | 6.90202E-06 | 0.006747411 |
| 977.639983 | 312.778447 | 7.05897E-06 | 0.006901135 |
| 977.679983 | 301.321976 | 6.80042E-06 | 0.006648632 |
| 977.719983 | 304.567985 | 6.87368E-06 | 0.00672053  |
| 977.759983 | 303.931518 | 6.85931E-06 | 0.00670676  |
| 977.799983 | 296.409189 | 6.68954E-06 | 0.006541035 |
| 977.839983 | 319.145975 | 7.20268E-06 | 0.007043069 |
| 977.879983 | 318.940769 | 7.19805E-06 | 0.007038828 |
| 977.919983 | 328.98571  | 7.42475E-06 | 0.007260811 |
| 977.959983 | 342.250695 | 7.72412E-06 | 0.007553882 |
| 977.999983 | 353.218276 | 7.97164E-06 | 0.007796268 |

|            |            |             |             |
|------------|------------|-------------|-------------|
| 978.039983 | 402.895046 | 9.09278E-06 | 0.008893102 |
| 978.079983 | 481.334183 | 1.0863E-05  | 0.010624924 |
| 978.119983 | 594.551936 | 1.34182E-05 | 0.013124618 |
| 978.159983 | 674.296666 | 1.52179E-05 | 0.014885577 |
| 978.199983 | 713.030177 | 1.60921E-05 | 0.01574129  |
| 978.239983 | 714.83147  | 1.61328E-05 | 0.015781702 |
| 978.279983 | 663.943402 | 1.49843E-05 | 0.014658819 |
| 978.319983 | 595.815834 | 1.34467E-05 | 0.013155208 |
| 978.359983 | 534.124448 | 1.20544E-05 | 0.011793586 |
| 978.399983 | 448.948253 | 1.01321E-05 | 0.009913282 |
| 978.439983 | 368.827211 | 8.32392E-06 | 0.008144453 |
| 978.479983 | 331.828481 | 7.48891E-06 | 0.007327745 |
| 978.519983 | 309.723433 | 6.99003E-06 | 0.006839881 |
| 978.559983 | 304.841684 | 6.87985E-06 | 0.006732348 |
| 978.599983 | 302.270301 | 6.82182E-06 | 0.006675833 |
| 978.639983 | 300.685599 | 6.78606E-06 | 0.006641105 |
| 978.679983 | 314.264251 | 7.09251E-06 | 0.006941294 |
| 978.719983 | 346.949958 | 7.83018E-06 | 0.007663551 |
| 978.759983 | 365.852932 | 8.25679E-06 | 0.008081417 |
| 978.799983 | 369.089779 | 8.32984E-06 | 0.008153249 |
| 978.839983 | 369.480194 | 8.33865E-06 | 0.008162207 |
| 978.879983 | 343.934292 | 7.76212E-06 | 0.007598182 |
| 978.919983 | 320.089687 | 7.22398E-06 | 0.007071697 |
| 978.959983 | 344.123072 | 7.76638E-06 | 0.007602974 |
| 978.999983 | 432.42362  | 9.7592E-06  | 0.009554255 |
| 979.039983 | 539.116377 | 1.21671E-05 | 0.011912083 |
| 979.079983 | 660.491216 | 1.49064E-05 | 0.014594525 |
| 979.119983 | 759.304722 | 1.71364E-05 | 0.016778641 |
| 979.159983 | 846.42839  | 1.91027E-05 | 0.018704609 |
| 979.199983 | 895.281345 | 2.02053E-05 | 0.019784983 |
| 979.239983 | 878.959456 | 1.98369E-05 | 0.019425076 |
| 979.279983 | 790.75927  | 1.78463E-05 | 0.017476559 |
| 979.319983 | 695.330192 | 1.56926E-05 | 0.01536811  |
| 979.359983 | 649.163663 | 1.46507E-05 | 0.014348329 |
| 979.399983 | 564.020608 | 1.27292E-05 | 0.012466939 |
| 979.439983 | 442.852736 | 9.99457E-06 | 0.009789081 |
| 979.479983 | 360.977774 | 8.14677E-06 | 0.007979594 |
| 979.519983 | 328.279247 | 7.40881E-06 | 0.007257073 |
| 979.559983 | 317.979285 | 7.17635E-06 | 0.007029665 |
| 979.599983 | 321.571391 | 7.25742E-06 | 0.007109367 |
| 979.639983 | 331.159449 | 7.47381E-06 | 0.007321641 |
| 979.679983 | 315.641756 | 7.12359E-06 | 0.006978843 |
| 979.719983 | 341.971984 | 7.71783E-06 | 0.007561314 |
| 979.759983 | 358.693459 | 8.09521E-06 | 0.007931365 |
| 979.799983 | 328.174592 | 7.40644E-06 | 0.007256833 |
| 979.839983 | 319.315227 | 7.2065E-06  | 0.007061217 |

|            |            |             |             |
|------------|------------|-------------|-------------|
| 979.879983 | 305.817193 | 6.90187E-06 | 0.006763002 |
| 979.919983 | 305.559957 | 6.89606E-06 | 0.00675759  |
| 979.959983 | 308.20276  | 6.95571E-06 | 0.006816315 |
| 979.999983 | 344.667934 | 7.77868E-06 | 0.007623102 |
| 980.039983 | 433.03966  | 9.7731E-06  | 0.009578031 |
| 980.079983 | 521.787367 | 1.1776E-05  | 0.011541436 |
| 980.119983 | 604.502265 | 1.36428E-05 | 0.013371556 |
| 980.159983 | 661.82131  | 1.49364E-05 | 0.014640047 |
| 980.199983 | 670.262051 | 1.51269E-05 | 0.014827368 |
| 980.239983 | 637.130112 | 1.43791E-05 | 0.014095007 |
| 980.279983 | 605.648139 | 1.36686E-05 | 0.013399089 |
| 980.319983 | 574.49152  | 1.29655E-05 | 0.012710313 |
| 980.359983 | 512.025872 | 1.15557E-05 | 0.011328756 |
| 980.399983 | 418.098913 | 9.43591E-06 | 0.009250966 |
| 980.439983 | 342.490673 | 7.72954E-06 | 0.007578348 |
| 980.479983 | 337.364644 | 7.61385E-06 | 0.007465228 |
| 980.519983 | 363.949294 | 8.21383E-06 | 0.008053823 |
| 980.559983 | 404.476725 | 9.12848E-06 | 0.008951019 |
| 980.599983 | 428.438559 | 9.66926E-06 | 0.009481678 |
| 980.639983 | 408.988731 | 9.23031E-06 | 0.009051607 |
| 980.679983 | 346.58321  | 7.8219E-06  | 0.007670781 |
| 980.719983 | 309.731991 | 6.99022E-06 | 0.006855448 |
| 980.759983 | 315.457817 | 7.11944E-06 | 0.006982465 |
| 980.799983 | 317.057413 | 7.15554E-06 | 0.007018158 |
| 980.839983 | 313.704253 | 7.07987E-06 | 0.006944218 |
| 980.879983 | 330.615668 | 7.46154E-06 | 0.00731887  |
| 980.919983 | 385.261699 | 8.69482E-06 | 0.008528923 |
| 980.959983 | 456.490806 | 1.03024E-05 | 0.010106205 |
| 980.999983 | 537.00815  | 1.21195E-05 | 0.011889255 |
| 981.039983 | 616.257713 | 1.39081E-05 | 0.013644381 |
| 981.079983 | 725.982406 | 1.63844E-05 | 0.016074418 |
| 981.119983 | 849.753997 | 1.91778E-05 | 0.018815688 |
| 981.159983 | 935.242264 | 2.11071E-05 | 0.020709457 |
| 981.199983 | 962.663591 | 2.1726E-05  | 0.021317528 |
| 981.239983 | 939.716496 | 2.12081E-05 | 0.020810228 |
| 981.279983 | 876.246963 | 1.97757E-05 | 0.019405473 |
| 981.319983 | 752.640915 | 1.69861E-05 | 0.016668757 |
| 981.359983 | 626.905979 | 1.41484E-05 | 0.013884668 |
| 981.399983 | 588.321311 | 1.32776E-05 | 0.013030629 |
| 981.439983 | 623.137363 | 1.40633E-05 | 0.013802326 |
| 981.479983 | 674.09119  | 1.52133E-05 | 0.014931549 |
| 981.519983 | 670.515858 | 1.51326E-05 | 0.014852958 |
| 981.559983 | 607.708238 | 1.37151E-05 | 0.013462221 |
| 981.599983 | 520.951593 | 1.17572E-05 | 0.01154082  |
| 981.639983 | 449.309919 | 1.01403E-05 | 0.009954123 |
| 981.679983 | 420.6348   | 9.49314E-06 | 0.009319227 |

|            |            |             |             |
|------------|------------|-------------|-------------|
| 981.719983 | 405.138236 | 9.14341E-06 | 0.008976264 |
| 981.759983 | 386.227462 | 8.71662E-06 | 0.008557625 |
| 981.799983 | 330.498766 | 7.4589E-06  | 0.007323145 |
| 981.839983 | 291.286594 | 6.57393E-06 | 0.00645455  |
| 981.879983 | 298.292436 | 6.73204E-06 | 0.00661006  |
| 981.919983 | 314.601714 | 7.10012E-06 | 0.006971752 |
| 981.959983 | 327.25468  | 7.38568E-06 | 0.007252444 |
| 981.999983 | 383.132362 | 8.64676E-06 | 0.008491122 |
| 982.039983 | 468.784725 | 1.05798E-05 | 0.010389805 |
| 982.079983 | 538.499478 | 1.21532E-05 | 0.011935398 |
| 982.119983 | 634.951954 | 1.433E-05   | 0.014073761 |
| 982.159983 | 744.601529 | 1.68046E-05 | 0.016504825 |
| 982.199983 | 804.690532 | 1.81607E-05 | 0.017837483 |
| 982.239983 | 803.364977 | 1.81308E-05 | 0.017808825 |
| 982.279983 | 761.555246 | 1.71872E-05 | 0.016882683 |
| 982.319983 | 686.963354 | 1.55038E-05 | 0.015229698 |
| 982.359983 | 608.266939 | 1.37277E-05 | 0.01348558  |
| 982.399983 | 558.220469 | 1.25983E-05 | 0.012376529 |
| 982.439983 | 513.97741  | 1.15998E-05 | 0.011396062 |
| 982.479983 | 460.219482 | 1.03865E-05 | 0.010204541 |
| 982.519983 | 479.5794   | 1.08234E-05 | 0.010634245 |
| 982.559983 | 472.758579 | 1.06695E-05 | 0.010483426 |
| 982.599983 | 450.207097 | 1.01605E-05 | 0.009983753 |
| 982.639983 | 439.229835 | 9.91281E-06 | 0.009740719 |
| 982.679983 | 467.540877 | 1.05517E-05 | 0.01036899  |
| 982.719983 | 506.411522 | 1.1429E-05  | 0.011231509 |
| 982.759983 | 528.316113 | 1.19234E-05 | 0.0117178   |
| 982.799983 | 495.389999 | 1.11803E-05 | 0.010987962 |
| 982.839983 | 459.940254 | 1.03802E-05 | 0.010202086 |
| 982.879983 | 445.612442 | 1.00569E-05 | 0.009884679 |
| 982.919983 | 411.036992 | 9.27653E-06 | 0.009118089 |
| 982.959982 | 398.740361 | 8.99901E-06 | 0.008845671 |
| 982.999982 | 480.406922 | 1.08421E-05 | 0.010657799 |
| 983.039982 | 636.041226 | 1.43546E-05 | 0.014111111 |
| 983.079982 | 753.929213 | 1.70151E-05 | 0.016727236 |
| 983.119982 | 825.894705 | 1.86393E-05 | 0.018324662 |
| 983.159982 | 913.338536 | 2.06128E-05 | 0.020265659 |
| 983.199982 | 981.239399 | 2.21452E-05 | 0.021773167 |
| 983.239982 | 985.272952 | 2.22362E-05 | 0.021863558 |
| 983.279982 | 894.050493 | 2.01775E-05 | 0.019840107 |
| 983.319982 | 760.032267 | 1.71529E-05 | 0.016866759 |
| 983.359982 | 637.817703 | 1.43947E-05 | 0.01415513  |
| 983.399982 | 540.312204 | 1.21941E-05 | 0.011991672 |
| 983.439982 | 459.423832 | 1.03686E-05 | 0.010196852 |
| 983.479982 | 429.096889 | 9.68412E-06 | 0.009524137 |
| 983.519982 | 411.918226 | 9.29642E-06 | 0.009143215 |

|            |            |             |             |
|------------|------------|-------------|-------------|
| 983.559982 | 356.256696 | 8.04022E-06 | 0.007908036 |
| 983.599982 | 353.290466 | 7.97327E-06 | 0.007842512 |
| 983.639982 | 379.756607 | 8.57058E-06 | 0.008430363 |
| 983.679982 | 356.497657 | 8.04566E-06 | 0.00791435  |
| 983.719982 | 343.456546 | 7.75134E-06 | 0.007625144 |
| 983.759982 | 361.808003 | 8.1655E-06  | 0.008032895 |
| 983.799982 | 346.175314 | 7.81269E-06 | 0.007686129 |
| 983.839982 | 326.396761 | 7.36632E-06 | 0.00724728  |
| 983.879982 | 330.268198 | 7.45369E-06 | 0.00733354  |
| 983.919982 | 325.337985 | 7.34243E-06 | 0.007224359 |
| 983.959982 | 318.843356 | 7.19585E-06 | 0.007080429 |
| 983.999982 | 351.772951 | 7.93903E-06 | 0.007812001 |
| 984.039982 | 413.384798 | 9.32952E-06 | 0.00918062  |
| 984.079982 | 503.207222 | 1.13567E-05 | 0.011175887 |
| 984.119982 | 608.895245 | 1.37419E-05 | 0.013523696 |
| 984.159982 | 688.149008 | 1.55306E-05 | 0.01528456  |
| 984.199982 | 731.563768 | 1.65104E-05 | 0.016249511 |
| 984.239982 | 723.679611 | 1.63324E-05 | 0.016075041 |
| 984.279982 | 684.660881 | 1.54518E-05 | 0.015208939 |
| 984.319982 | 632.680298 | 1.42787E-05 | 0.014054823 |
| 984.359982 | 554.263881 | 1.2509E-05  | 0.012313323 |
| 984.399982 | 483.287208 | 1.09071E-05 | 0.010736968 |
| 984.439982 | 443.034467 | 9.99867E-06 | 0.009843091 |
| 984.479982 | 417.07137  | 9.41272E-06 | 0.009266634 |
| 984.519982 | 364.754854 | 8.23201E-06 | 0.008104577 |
| 984.559982 | 309.714123 | 6.98982E-06 | 0.006881893 |
| 984.599982 | 306.040923 | 6.90692E-06 | 0.006800551 |
| 984.639982 | 352.606216 | 7.95783E-06 | 0.007835599 |
| 984.679982 | 384.785579 | 8.68407E-06 | 0.008551034 |
| 984.719982 | 378.572399 | 8.54385E-06 | 0.008413302 |
| 984.759982 | 367.557885 | 8.29527E-06 | 0.008168849 |
| 984.799982 | 374.762516 | 8.45787E-06 | 0.008329308 |
| 984.839982 | 376.895341 | 8.506E-06   | 0.008377052 |
| 984.879982 | 364.951147 | 8.23644E-06 | 0.008111904 |
| 984.919982 | 353.142215 | 7.96993E-06 | 0.007849741 |
| 984.959982 | 371.619379 | 8.38693E-06 | 0.008260792 |
| 984.999982 | 425.80007  | 9.60971E-06 | 0.009465569 |
| 985.039982 | 511.603225 | 1.15462E-05 | 0.011373441 |
| 985.079982 | 622.069063 | 1.40392E-05 | 0.013829767 |
| 985.119982 | 725.397914 | 1.63712E-05 | 0.016127616 |
| 985.159982 | 782.342637 | 1.76564E-05 | 0.017394363 |
| 985.199982 | 820.205972 | 1.85109E-05 | 0.018236945 |
| 985.239982 | 834.03976  | 1.88231E-05 | 0.018545286 |
| 985.279982 | 792.398207 | 1.78833E-05 | 0.017620081 |
| 985.319982 | 716.173632 | 1.6163E-05  | 0.015925768 |
| 985.359982 | 601.095947 | 1.35659E-05 | 0.013367293 |

|            |            |             |             |
|------------|------------|-------------|-------------|
| 985.399982 | 508.426524 | 1.14745E-05 | 0.011306951 |
| 985.439982 | 415.454852 | 9.37624E-06 | 0.009239719 |
| 985.479982 | 337.560452 | 7.61827E-06 | 0.007507652 |
| 985.519982 | 318.71754  | 7.19301E-06 | 0.007088856 |
| 985.559982 | 308.052023 | 6.95231E-06 | 0.006851914 |
| 985.599982 | 315.701268 | 7.12494E-06 | 0.007022339 |
| 985.639982 | 329.625666 | 7.43919E-06 | 0.007332365 |
| 985.679982 | 356.60244  | 8.04802E-06 | 0.007932773 |
| 985.719982 | 360.453428 | 8.13493E-06 | 0.008018765 |
| 985.759982 | 347.848764 | 7.85046E-06 | 0.007738671 |
| 985.799982 | 324.477217 | 7.323E-06   | 0.007219012 |
| 985.839982 | 300.468423 | 6.78115E-06 | 0.006685133 |
| 985.879982 | 274.297481 | 6.19051E-06 | 0.006103102 |
| 985.919982 | 267.182872 | 6.02995E-06 | 0.005945044 |
| 985.959982 | 295.737566 | 6.67438E-06 | 0.006580676 |
| 985.999982 | 343.015713 | 7.74139E-06 | 0.007633007 |
| 986.039982 | 407.055403 | 9.18667E-06 | 0.009058427 |
| 986.079982 | 501.348141 | 1.13147E-05 | 0.011157228 |
| 986.119982 | 560.11269  | 1.2641E-05  | 0.012465506 |
| 986.159982 | 595.424665 | 1.34379E-05 | 0.013251924 |
| 986.199982 | 641.257727 | 1.44723E-05 | 0.014272576 |
| 986.239982 | 693.274838 | 1.56462E-05 | 0.015430955 |
| 986.279982 | 670.411094 | 1.51302E-05 | 0.014922657 |
| 986.319982 | 602.837957 | 1.36052E-05 | 0.013419093 |
| 986.359982 | 539.730003 | 1.2181E-05  | 0.012014806 |
| 986.399982 | 460.886499 | 1.04016E-05 | 0.010260105 |
| 986.439982 | 384.062774 | 8.66776E-06 | 0.008550227 |
| 986.479982 | 336.129035 | 7.58596E-06 | 0.007483402 |
| 986.519982 | 311.624924 | 7.03294E-06 | 0.006938136 |
| 986.559982 | 307.609542 | 6.94232E-06 | 0.006849014 |
| 986.599982 | 306.989845 | 6.92833E-06 | 0.006835493 |
| 986.639982 | 313.33529  | 7.07154E-06 | 0.006977065 |
| 986.679982 | 336.918723 | 7.60379E-06 | 0.007502504 |
| 986.719982 | 366.8721   | 8.27979E-06 | 0.008169836 |
| 986.759982 | 370.845499 | 8.36947E-06 | 0.008258654 |
| 986.799982 | 357.769554 | 8.07436E-06 | 0.007967779 |
| 986.839982 | 361.709835 | 8.16329E-06 | 0.008055858 |
| 986.879982 | 352.745998 | 7.96099E-06 | 0.007856538 |
| 986.919982 | 367.257107 | 8.28848E-06 | 0.008180068 |
| 986.959982 | 401.606959 | 9.06371E-06 | 0.008945519 |
| 986.999982 | 451.246222 | 1.0184E-05  | 0.010051607 |
| 987.039982 | 528.082595 | 1.19181E-05 | 0.01176363  |
| 987.079982 | 606.819886 | 1.36951E-05 | 0.013518139 |
| 987.119982 | 673.782122 | 1.52063E-05 | 0.015010466 |
| 987.159982 | 719.639887 | 1.62413E-05 | 0.016032732 |
| 987.199982 | 754.161957 | 1.70204E-05 | 0.016802524 |



|            |            |             |             |
|------------|------------|-------------|-------------|
| 987.239982 | 778.47064  | 1.7569E-05  | 0.017344817 |
| 987.279982 | 727.822028 | 1.64259E-05 | 0.016216991 |
| 987.319982 | 627.294619 | 1.41572E-05 | 0.013977653 |
| 987.359982 | 521.57035  | 1.17711E-05 | 0.011622329 |
| 987.399982 | 415.310348 | 9.37298E-06 | 0.009254876 |
| 987.439982 | 357.139341 | 8.06014E-06 | 0.007958902 |
| 987.479982 | 340.714949 | 7.68946E-06 | 0.00759319  |
| 987.519982 | 333.058496 | 7.51667E-06 | 0.007422858 |
| 987.559982 | 326.776631 | 7.37489E-06 | 0.00728315  |
| 987.599982 | 325.264002 | 7.34076E-06 | 0.00724973  |
| 987.639982 | 307.877538 | 6.94837E-06 | 0.006862485 |
| 987.679982 | 303.547515 | 6.85064E-06 | 0.006766245 |
| 987.719982 | 314.991161 | 7.10891E-06 | 0.007021614 |
| 987.759982 | 327.721115 | 7.39621E-06 | 0.007305679 |
| 987.799982 | 336.214726 | 7.5879E-06  | 0.007495326 |
| 987.839982 | 323.860822 | 7.30909E-06 | 0.007220209 |
| 987.879982 | 288.750279 | 6.51669E-06 | 0.006437709 |
| 987.919982 | 281.2954   | 6.34845E-06 | 0.006271756 |
| 987.959982 | 313.479367 | 7.07479E-06 | 0.006989612 |
| 987.999982 | 363.872266 | 8.21209E-06 | 0.008113545 |
| 988.039982 | 426.963952 | 9.63598E-06 | 0.009520735 |
| 988.079982 | 510.188053 | 1.15142E-05 | 0.011376984 |
| 988.119982 | 601.69907  | 1.35795E-05 | 0.013418185 |
| 988.159982 | 636.508936 | 1.43651E-05 | 0.014195037 |
| 988.199982 | 638.689971 | 1.44143E-05 | 0.014244254 |
| 988.239982 | 605.233493 | 1.36593E-05 | 0.013498644 |
| 988.279982 | 591.910793 | 1.33586E-05 | 0.013202039 |
| 988.319982 | 577.287766 | 1.30286E-05 | 0.012876407 |
| 988.359982 | 497.202147 | 1.12212E-05 | 0.011090545 |
| 988.399982 | 402.633991 | 9.08689E-06 | 0.00898148  |
| 988.439982 | 344.003664 | 7.76368E-06 | 0.007673935 |
| 988.479982 | 321.344699 | 7.2523E-06  | 0.007168756 |
| 988.519982 | 334.290626 | 7.54447E-06 | 0.007457863 |
| 988.559982 | 355.116216 | 8.01448E-06 | 0.007922793 |
| 988.599982 | 362.135302 | 8.17289E-06 | 0.008079718 |
| 988.639982 | 362.529192 | 8.18178E-06 | 0.008088834 |
| 988.679982 | 357.741307 | 8.07372E-06 | 0.007982328 |
| 988.719982 | 341.240636 | 7.70133E-06 | 0.007614455 |
| 988.759982 | 312.585458 | 7.05462E-06 | 0.006975324 |
| 988.799982 | 295.024778 | 6.6583E-06  | 0.006583725 |
| 988.839982 | 265.672955 | 5.99587E-06 | 0.005928955 |
| 988.879982 | 265.378088 | 5.98921E-06 | 0.005922614 |
| 988.919982 | 291.011238 | 6.56772E-06 | 0.006494948 |
| 988.959982 | 338.297783 | 7.63491E-06 | 0.00755062  |
| 988.999982 | 394.60467  | 8.90568E-06 | 0.008807715 |
| 989.039982 | 473.791287 | 1.06928E-05 | 0.010575616 |

|            |            |             |             |
|------------|------------|-------------|-------------|
| 989.079982 | 554.31683  | 1.25102E-05 | 0.012373548 |
| 989.119982 | 667.930625 | 1.50743E-05 | 0.014910256 |
| 989.159982 | 768.735201 | 1.73493E-05 | 0.017161216 |
| 989.199982 | 785.26338  | 1.77223E-05 | 0.0175309   |
| 989.239982 | 758.301519 | 1.71138E-05 | 0.016929664 |
| 989.279982 | 698.229063 | 1.57581E-05 | 0.015589131 |
| 989.319982 | 627.147531 | 1.41538E-05 | 0.014002683 |
| 989.359982 | 549.455744 | 1.24005E-05 | 0.01226851  |
| 989.399982 | 482.063721 | 1.08795E-05 | 0.010764184 |
| 989.439982 | 404.367006 | 9.126E-06   | 0.009029629 |
| 989.479982 | 338.471245 | 7.63882E-06 | 0.007558464 |
| 989.519982 | 295.926368 | 6.67865E-06 | 0.006608654 |
| 989.559982 | 298.660992 | 6.74036E-06 | 0.006669993 |
| 989.599982 | 331.927046 | 7.49113E-06 | 0.007413223 |
| 989.639982 | 343.447624 | 7.75113E-06 | 0.007670833 |
| 989.679982 | 351.245701 | 7.92713E-06 | 0.007845318 |
| 989.719982 | 341.240114 | 7.70131E-06 | 0.007622144 |
| 989.759982 | 325.395831 | 7.34373E-06 | 0.007268531 |
| 989.799982 | 311.250702 | 7.02449E-06 | 0.006952845 |
| 989.839982 | 284.376481 | 6.41798E-06 | 0.006352774 |
| 989.879982 | 264.582587 | 5.97126E-06 | 0.005910831 |
| 989.919982 | 246.767052 | 5.56919E-06 | 0.005513051 |
| 989.959982 | 272.414694 | 6.14802E-06 | 0.006086294 |
| 989.999982 | 336.184604 | 7.58722E-06 | 0.007511346 |
| 990.039982 | 391.165402 | 8.82806E-06 | 0.008740131 |
| 990.079982 | 440.025171 | 9.93076E-06 | 0.009832242 |
| 990.119982 | 519.59474  | 1.17265E-05 | 0.011610671 |
| 990.159982 | 617.828787 | 1.39435E-05 | 0.013806331 |
| 990.199982 | 669.623832 | 1.51125E-05 | 0.014964375 |
| 990.239982 | 674.441741 | 1.52212E-05 | 0.015072651 |
| 990.279982 | 666.967549 | 1.50525E-05 | 0.014906218 |
| 990.319982 | 622.420912 | 1.40472E-05 | 0.013911196 |
| 990.359982 | 550.092002 | 1.24148E-05 | 0.012295131 |
| 990.399982 | 496.184509 | 1.11982E-05 | 0.01109069  |
| 990.439982 | 460.897705 | 1.04018E-05 | 0.010302378 |
| 990.479982 | 425.775089 | 9.60915E-06 | 0.009517671 |
| 990.519982 | 392.249303 | 8.85252E-06 | 0.008768598 |
| 990.559982 | 384.161556 | 8.66999E-06 | 0.008588146 |
| 990.599982 | 424.52892  | 9.58103E-06 | 0.009490965 |
| 990.639982 | 481.151572 | 1.08589E-05 | 0.010757281 |
| 990.679982 | 498.474794 | 1.12499E-05 | 0.011145033 |
| 990.719982 | 527.12778  | 1.18965E-05 | 0.01178614  |
| 990.759982 | 594.624079 | 1.34198E-05 | 0.013295838 |
| 990.799982 | 651.203313 | 1.46968E-05 | 0.014561541 |
| 990.839982 | 694.779645 | 1.56802E-05 | 0.015536578 |
| 990.879982 | 792.668503 | 1.78894E-05 | 0.017726272 |

|            |             |             |             |
|------------|-------------|-------------|-------------|
| 990.919982 | 919.658598  | 2.07554E-05 | 0.020566954 |
| 990.959982 | 1084.567558 | 2.44772E-05 | 0.024255905 |
| 990.999982 | 1349.235004 | 3.04504E-05 | 0.030176301 |
| 991.039982 | 1661.165194 | 3.74902E-05 | 0.037154272 |
| 991.079982 | 2001.039133 | 4.51607E-05 | 0.044757832 |
| 991.119982 | 2436.644888 | 5.49917E-05 | 0.054503354 |
| 991.159982 | 2980.748047 | 6.72713E-05 | 0.066676652 |
| 991.199982 | 3479.390661 | 7.8525E-05  | 0.077833979 |
| 991.239982 | 3702.813352 | 8.35673E-05 | 0.082835288 |
| 991.279982 | 3587.115714 | 8.09562E-05 | 0.080250266 |
| 991.319982 | 3106.364546 | 7.01063E-05 | 0.069497797 |
| 991.359982 | 2333.129846 | 5.26555E-05 | 0.052200546 |
| 991.399982 | 1598.280789 | 3.6071E-05  | 0.03576076  |
| 991.439982 | 1009.654779 | 2.27865E-05 | 0.022591449 |
| 991.479982 | 618.985416  | 1.39696E-05 | 0.013850617 |
| 991.519982 | 456.475342  | 1.0302E-05  | 0.010214651 |
| 991.559982 | 399.488479  | 9.0159E-06  | 0.008939804 |
| 991.599982 | 391.610193  | 8.8381E-06  | 0.008763856 |
| 991.639982 | 432.108597  | 9.75209E-06 | 0.009670562 |
| 991.679982 | 422.584487  | 9.53714E-06 | 0.009457794 |
| 991.719982 | 384.611791  | 8.68015E-06 | 0.008608281 |
| 991.759982 | 360.367444  | 8.13299E-06 | 0.008065975 |
| 991.799982 | 383.194993  | 8.64818E-06 | 0.008577262 |
| 991.839982 | 433.665852  | 9.78723E-06 | 0.00970737  |
| 991.879982 | 450.997301  | 1.01784E-05 | 0.010095732 |
| 991.919982 | 477.297884  | 1.07719E-05 | 0.010684911 |
| 991.959982 | 554.054734  | 1.25042E-05 | 0.012403709 |
| 991.999982 | 645.570087  | 1.45696E-05 | 0.01445306  |
| 992.039982 | 791.306453  | 1.78587E-05 | 0.017716529 |
| 992.079982 | 1008.653502 | 2.27639E-05 | 0.022583614 |
| 992.119982 | 1250.891897 | 2.82309E-05 | 0.028008428 |
| 992.159982 | 1434.895776 | 3.23836E-05 | 0.032129711 |
| 992.199982 | 1596.866829 | 3.60391E-05 | 0.035757955 |
| 992.239982 | 1723.59146  | 3.88991E-05 | 0.038597201 |
| 992.279982 | 1699.262488 | 3.835E-05   | 0.038053925 |
| 992.319982 | 1477.445271 | 3.33439E-05 | 0.0330878   |
| 992.359982 | 1155.257641 | 2.60726E-05 | 0.025873361 |
| 992.399982 | 850.603037  | 1.91969E-05 | 0.019051029 |
| 992.439982 | 596.472998  | 1.34616E-05 | 0.013359795 |
| 992.479982 | 425.965488  | 9.61345E-06 | 0.009541154 |
| 992.519982 | 337.26653   | 7.61164E-06 | 0.007554701 |
| 992.559982 | 314.66251   | 7.10149E-06 | 0.007048659 |
| 992.599982 | 328.816399  | 7.42093E-06 | 0.007366013 |
| 992.639982 | 372.270002  | 8.40162E-06 | 0.008339779 |
| 992.679982 | 404.676335  | 9.13298E-06 | 0.009066128 |
| 992.719982 | 405.444924  | 9.15033E-06 | 0.009083713 |

|            |             |             |             |
|------------|-------------|-------------|-------------|
| 992.759982 | 373.300505  | 8.42487E-06 | 0.008363876 |
| 992.799982 | 372.816317  | 8.41394E-06 | 0.008353364 |
| 992.839982 | 380.178116  | 8.58009E-06 | 0.008518657 |
| 992.879982 | 372.11217   | 8.39805E-06 | 0.008338259 |
| 992.919982 | 376.602749  | 8.4994E-06  | 0.008439224 |
| 992.959982 | 420.200554  | 9.48334E-06 | 0.009416578 |
| 992.999982 | 468.365719  | 1.05704E-05 | 0.010496369 |
| 993.039982 | 584.708662  | 1.31961E-05 | 0.013104215 |
| 993.079982 | 717.799481  | 1.61997E-05 | 0.016087632 |
| 993.119982 | 879.74117   | 1.98545E-05 | 0.019717933 |
| 993.159982 | 1014.004559 | 2.28847E-05 | 0.022728139 |
| 993.199982 | 1135.389659 | 2.56242E-05 | 0.025449918 |
| 993.239982 | 1184.10153  | 2.67235E-05 | 0.026542871 |
| 993.279982 | 1123.927773 | 2.53655E-05 | 0.025195028 |
| 993.319982 | 1010.058851 | 2.27956E-05 | 0.022643346 |
| 993.359982 | 829.67031   | 1.87245E-05 | 0.018600172 |
| 993.399982 | 643.23205   | 1.45169E-05 | 0.01442104  |
| 993.439982 | 493.282881  | 1.11327E-05 | 0.011059677 |
| 993.479982 | 399.920245  | 9.02564E-06 | 0.008966796 |
| 993.519982 | 339.80023   | 7.66882E-06 | 0.007619124 |
| 993.559982 | 308.603706  | 6.96476E-06 | 0.006919903 |
| 993.599982 | 303.518216  | 6.84998E-06 | 0.006806143 |
| 993.639982 | 305.065113  | 6.88489E-06 | 0.006841107 |
| 993.679982 | 317.973866  | 7.17623E-06 | 0.007130873 |
| 993.719982 | 316.242956  | 7.13716E-06 | 0.007092342 |
| 993.759982 | 320.261274  | 7.22785E-06 | 0.007182749 |
| 993.799982 | 316.426071  | 7.1413E-06  | 0.00709702  |
| 993.839982 | 302.302174  | 6.82254E-06 | 0.006780512 |
| 993.879982 | 310.852848  | 7.01552E-06 | 0.006972581 |
| 993.919982 | 327.654571  | 7.39471E-06 | 0.007349747 |
| 993.959982 | 345.999895  | 7.80874E-06 | 0.007761571 |
| 993.999982 | 376.296853  | 8.4925E-06  | 0.008441541 |
| 994.039982 | 404.032447  | 9.11845E-06 | 0.009064103 |
| 994.079982 | 495.594139  | 1.11849E-05 | 0.011118655 |
| 994.119982 | 624.122408  | 1.40856E-05 | 0.01400275  |
| 994.159982 | 750.352858  | 1.69344E-05 | 0.016835522 |
| 994.199982 | 803.003902  | 1.81227E-05 | 0.018017568 |
| 994.239982 | 817.139809  | 1.84417E-05 | 0.018335483 |
| 994.279982 | 768.011046  | 1.73329E-05 | 0.017233795 |
| 994.319982 | 688.973851  | 1.55492E-05 | 0.015460861 |
| 994.359982 | 587.479048  | 1.32586E-05 | 0.013183805 |
| 994.399982 | 490.530006  | 1.10706E-05 | 0.011008584 |
| 994.439982 | 389.859165  | 8.79858E-06 | 0.008749658 |
| 994.479982 | 308.770579  | 6.96852E-06 | 0.006930056 |
| 994.519982 | 280.215522  | 6.32407E-06 | 0.006289418 |
| 994.559982 | 292.007455  | 6.5902E-06  | 0.006554351 |

|            |            |             |             |
|------------|------------|-------------|-------------|
| 994.599982 | 322.369288 | 7.27543E-06 | 0.007236138 |
| 994.639982 | 344.099197 | 7.76584E-06 | 0.007724215 |
| 994.679982 | 353.994116 | 7.98915E-06 | 0.007946652 |
| 994.719982 | 356.43647  | 8.04427E-06 | 0.008001801 |
| 994.759982 | 363.720869 | 8.20867E-06 | 0.00816566  |
| 994.799982 | 381.739293 | 8.61532E-06 | 0.008570524 |
| 994.839982 | 366.679516 | 8.27545E-06 | 0.008232744 |
| 994.879982 | 328.124669 | 7.40532E-06 | 0.007367401 |
| 994.919982 | 322.929188 | 7.28806E-06 | 0.007251038 |
| 994.959982 | 358.959223 | 8.10121E-06 | 0.008060379 |
| 994.999982 | 426.049385 | 9.61534E-06 | 0.009567264 |
| 995.039982 | 481.45948  | 1.08659E-05 | 0.010811975 |
| 995.079982 | 577.554317 | 1.30346E-05 | 0.012970466 |
| 995.119982 | 701.76634  | 1.58379E-05 | 0.0157606   |
| 995.159982 | 814.437781 | 1.83807E-05 | 0.018291763 |
| 995.199982 | 871.718992 | 1.96735E-05 | 0.01957905  |
| 995.239982 | 871.26064  | 1.96631E-05 | 0.019569542 |
| 995.279982 | 825.497536 | 1.86303E-05 | 0.018542394 |
| 995.319982 | 749.490533 | 1.6915E-05  | 0.016835795 |
| 995.359982 | 678.625442 | 1.53156E-05 | 0.015244566 |
| 995.399982 | 578.756643 | 1.30617E-05 | 0.013001647 |
| 995.439982 | 447.684538 | 1.01036E-05 | 0.010057544 |
| 995.479982 | 359.442463 | 8.11212E-06 | 0.008075449 |
| 995.519982 | 330.85715  | 7.46699E-06 | 0.007433533 |
| 995.559982 | 305.140111 | 6.88659E-06 | 0.006856011 |
| 995.599982 | 286.863559 | 6.47411E-06 | 0.006445625 |
| 995.639982 | 304.983504 | 6.88305E-06 | 0.006853043 |
| 995.679982 | 298.055955 | 6.72671E-06 | 0.006697648 |
| 995.719982 | 272.989618 | 6.161E-06   | 0.006134626 |
| 995.759982 | 282.530378 | 6.37632E-06 | 0.006349281 |
| 995.799982 | 295.839512 | 6.67669E-06 | 0.006648644 |
| 995.839982 | 282.303742 | 6.3712E-06  | 0.006344698 |
| 995.879982 | 253.399109 | 5.71886E-06 | 0.005695303 |
| 995.919982 | 241.835253 | 5.45788E-06 | 0.005435617 |
| 995.959982 | 271.527956 | 6.12801E-06 | 0.00610325  |
| 995.999982 | 339.120122 | 7.65347E-06 | 0.007622855 |
| 996.039982 | 410.439619 | 9.26305E-06 | 0.009226369 |
| 996.079982 | 485.820849 | 1.09643E-05 | 0.01092132  |
| 996.119982 | 555.887276 | 1.25456E-05 | 0.012496924 |
| 996.159982 | 587.697254 | 1.32635E-05 | 0.013212576 |
| 996.199982 | 592.650258 | 1.33753E-05 | 0.013324464 |
| 996.239982 | 621.254628 | 1.40209E-05 | 0.013968133 |
| 996.279982 | 631.736406 | 1.42574E-05 | 0.014204373 |
| 996.319982 | 582.843176 | 1.3154E-05  | 0.013105552 |
| 996.359982 | 509.12613  | 1.14903E-05 | 0.011448443 |
| 996.399982 | 430.004777 | 9.70461E-06 | 0.009669672 |

|            |            |             |             |
|------------|------------|-------------|-------------|
| 996.439982 | 364.699051 | 8.23075E-06 | 0.008201448 |
| 996.479982 | 326.54926  | 7.36976E-06 | 0.00734382  |
| 996.519982 | 333.386579 | 7.52407E-06 | 0.007497887 |
| 996.559982 | 366.185318 | 8.26429E-06 | 0.008235863 |
| 996.599982 | 360.221173 | 8.12969E-06 | 0.008102049 |
| 996.639982 | 360.279719 | 8.13101E-06 | 0.008103691 |
| 996.679982 | 369.59665  | 8.34128E-06 | 0.008313588 |
| 996.719982 | 381.78023  | 8.61625E-06 | 0.008587987 |
| 996.759982 | 381.785353 | 8.61636E-06 | 0.008588446 |
| 996.799982 | 386.049476 | 8.7126E-06  | 0.008684718 |
| 996.839982 | 389.982221 | 8.80136E-06 | 0.008773543 |
| 996.879982 | 379.044319 | 8.5545E-06  | 0.008527812 |
| 996.919982 | 354.357695 | 7.99736E-06 | 0.007972728 |
| 996.959982 | 375.290379 | 8.46978E-06 | 0.008444033 |
| 996.999982 | 467.729822 | 1.0556E-05  | 0.010524342 |
| 997.039982 | 571.646664 | 1.29013E-05 | 0.012863081 |
| 997.079982 | 669.274983 | 1.51046E-05 | 0.015060498 |
| 997.119982 | 743.789937 | 1.67863E-05 | 0.016737958 |
| 997.159982 | 810.311062 | 1.82876E-05 | 0.018235655 |
| 997.199982 | 868.27633  | 1.95958E-05 | 0.019540919 |
| 997.239982 | 865.451015 | 1.9532E-05  | 0.019478115 |
| 997.279982 | 766.521579 | 1.72993E-05 | 0.01725227  |
| 997.319982 | 654.409324 | 1.47691E-05 | 0.014729525 |
| 997.359982 | 579.316553 | 1.30744E-05 | 0.013039851 |
| 997.399982 | 513.597365 | 1.15912E-05 | 0.01156104  |
| 997.439982 | 445.147162 | 1.00464E-05 | 0.010020633 |
| 997.479982 | 380.886655 | 8.59608E-06 | 0.008574419 |
| 997.519982 | 350.095972 | 7.90118E-06 | 0.007881583 |
| 997.559982 | 335.796257 | 7.57845E-06 | 0.007559962 |
| 997.599982 | 323.1319   | 7.29264E-06 | 0.007275134 |
| 997.639982 | 323.580976 | 7.30277E-06 | 0.007285537 |
| 997.679982 | 308.349623 | 6.95902E-06 | 0.006942876 |
| 997.719982 | 279.012942 | 6.29693E-06 | 0.006282576 |
| 997.759982 | 267.955759 | 6.04739E-06 | 0.006033842 |
| 997.799982 | 293.337574 | 6.62022E-06 | 0.006605656 |
| 997.839982 | 325.775372 | 7.3523E-06  | 0.007336415 |
| 997.879982 | 310.967774 | 7.01811E-06 | 0.007003231 |
| 997.919982 | 277.89422  | 6.27169E-06 | 0.00625864  |
| 997.959982 | 306.134932 | 6.90904E-06 | 0.006894944 |
| 997.999982 | 363.548871 | 8.20479E-06 | 0.008188382 |
| 998.039982 | 416.203962 | 9.39314E-06 | 0.009374733 |
| 998.079982 | 460.269883 | 1.03877E-05 | 0.010367706 |
| 998.119982 | 517.527632 | 1.16799E-05 | 0.011657919 |
| 998.159982 | 630.098371 | 1.42204E-05 | 0.014194277 |
| 998.199982 | 709.49901  | 1.60124E-05 | 0.015983582 |
| 998.239982 | 753.499156 | 1.70054E-05 | 0.016975497 |

|             |            |             |             |
|-------------|------------|-------------|-------------|
| 998.279982  | 734.274301 | 1.65715E-05 | 0.016543045 |
| 998.319982  | 665.770774 | 1.50255E-05 | 0.015000276 |
| 998.359982  | 565.249366 | 1.27569E-05 | 0.012735969 |
| 998.399982  | 482.26171  | 1.0884E-05  | 0.010866561 |
| 998.439982  | 397.65315  | 8.97448E-06 | 0.008960477 |
| 998.479982  | 351.067395 | 7.9231E-06  | 0.007911059 |
| 998.519982  | 336.690921 | 7.59865E-06 | 0.007587399 |
| 998.559982  | 305.660949 | 6.89834E-06 | 0.006888408 |
| 998.599982  | 301.132009 | 6.79613E-06 | 0.006786615 |
| 998.639982  | 331.832886 | 7.48901E-06 | 0.007478821 |
| 998.679982  | 377.108079 | 8.5108E-06  | 0.00849957  |
| 998.719982  | 395.837261 | 8.9335E-06  | 0.008922061 |
| 998.759982  | 398.385739 | 8.99101E-06 | 0.008979862 |
| 998.799982  | 392.884166 | 8.86685E-06 | 0.008856208 |
| 998.839982  | 387.15981  | 8.73766E-06 | 0.008727522 |
| 998.879982  | 392.89156  | 8.86702E-06 | 0.008857084 |
| 998.919982  | 369.765213 | 8.34509E-06 | 0.008336073 |
| 998.959982  | 370.92767  | 8.37132E-06 | 0.008362615 |
| 998.999982  | 424.01748  | 9.56948E-06 | 0.009559914 |
| 999.039982  | 509.079284 | 1.14892E-05 | 0.011478181 |
| 999.079982  | 611.634351 | 1.38037E-05 | 0.013791036 |
| 999.119982  | 746.741318 | 1.68529E-05 | 0.016838081 |
| 999.159982  | 863.088303 | 1.94787E-05 | 0.019462338 |
| 999.199982  | 906.049554 | 2.04483E-05 | 0.020431917 |
| 999.239982  | 862.460362 | 1.94645E-05 | 0.019449736 |
| 999.279982  | 827.845847 | 1.86833E-05 | 0.018669875 |
| 999.319982  | 750.675716 | 1.69417E-05 | 0.016930185 |
| 999.359982  | 596.469351 | 1.34615E-05 | 0.013452867 |
| 999.399982  | 479.720225 | 1.08266E-05 | 0.010820121 |
| 999.439982  | 393.822668 | 8.88803E-06 | 0.008883052 |
| 999.479982  | 335.017466 | 7.56088E-06 | 0.007556946 |
| 999.519982  | 315.181009 | 7.1132E-06  | 0.007109782 |
| 999.559982  | 318.981888 | 7.19898E-06 | 0.007195809 |
| 999.599982  | 308.163282 | 6.95482E-06 | 0.006952034 |
| 999.639982  | 307.571341 | 6.94146E-06 | 0.006938958 |
| 999.679982  | 328.294412 | 7.40915E-06 | 0.007406777 |
| 999.719982  | 328.971144 | 7.42442E-06 | 0.007422342 |
| 999.759982  | 329.507836 | 7.43653E-06 | 0.007434748 |
| 999.799982  | 300.281297 | 6.77693E-06 | 0.006775575 |
| 999.839982  | 290.536662 | 6.55701E-06 | 0.006555959 |
| 999.879982  | 298.151007 | 6.72885E-06 | 0.006728045 |
| 999.919982  | 296.087606 | 6.68228E-06 | 0.00668175  |
| 999.959982  | 335.151177 | 7.5639E-06  | 0.007563593 |
| 999.999982  | 376.995642 | 8.50827E-06 | 0.008508266 |
| 1000.039982 | 414.823414 | 9.36199E-06 | 0.009362361 |
| 1000.079982 | 493.475434 | 1.11371E-05 | 0.011137944 |

|             |            |             |             |
|-------------|------------|-------------|-------------|
| 1000.119982 | 620.40469  | 1.40017E-05 | 0.01400335  |
| 1000.159982 | 683.230058 | 1.54196E-05 | 0.015422018 |
| 1000.199982 | 684.767205 | 1.54542E-05 | 0.015457333 |
| 1000.239982 | 657.756546 | 1.48446E-05 | 0.014848212 |
| 1000.279982 | 615.614809 | 1.38936E-05 | 0.013897459 |
| 1000.319982 | 590.748267 | 1.33324E-05 | 0.013336632 |
| 1000.359982 | 551.944624 | 1.24566E-05 | 0.012461106 |
| 1000.399982 | 467.156732 | 1.05431E-05 | 0.010547294 |
| 1000.439982 | 376.049059 | 8.4869E-06  | 0.008490638 |
| 1000.479982 | 340.664926 | 7.68833E-06 | 0.007692023 |
| 1000.519982 | 335.106359 | 7.56288E-06 | 0.007566816 |
| 1000.559982 | 333.88458  | 7.53531E-06 | 0.00753953  |
| 1000.599982 | 358.737315 | 8.0962E-06  | 0.008101059 |
| 1000.639982 | 373.928564 | 8.43905E-06 | 0.008444448 |
| 1000.679982 | 363.378008 | 8.20094E-06 | 0.008206512 |
| 1000.719982 | 366.262509 | 8.26603E-06 | 0.008271986 |
| 1000.759982 | 350.221857 | 7.90402E-06 | 0.007910026 |
| 1000.799982 | 347.31849  | 7.83849E-06 | 0.007844765 |
| 1000.839982 | 332.294926 | 7.49943E-06 | 0.007505733 |
| 1000.879982 | 322.467193 | 7.27764E-06 | 0.00728404  |
| 1000.919982 | 340.861034 | 7.69276E-06 | 0.007699836 |
| 1000.959982 | 396.271815 | 8.9433E-06  | 0.008951888 |
| 1000.999982 | 452.657532 | 1.02158E-05 | 0.010226066 |
| 1001.039982 | 540.808894 | 1.22053E-05 | 0.012217997 |
| 1001.079982 | 649.784846 | 1.46647E-05 | 0.014680577 |
| 1001.119982 | 705.130983 | 1.59138E-05 | 0.015931647 |
| 1001.159982 | 769.47805  | 1.7366E-05  | 0.017386192 |
| 1001.199982 | 854.840382 | 1.92926E-05 | 0.019315707 |
| 1001.239982 | 885.092198 | 1.99753E-05 | 0.020000067 |
| 1001.279982 | 858.737277 | 1.93805E-05 | 0.019405311 |
| 1001.319982 | 762.571613 | 1.72102E-05 | 0.017232896 |
| 1001.359982 | 656.053596 | 1.48062E-05 | 0.014826352 |
| 1001.399982 | 569.002747 | 1.28416E-05 | 0.012859577 |
| 1001.439982 | 479.474917 | 1.08211E-05 | 0.010836663 |
| 1001.479982 | 387.124902 | 8.73687E-06 | 0.0087498   |
| 1001.519982 | 322.065049 | 7.26856E-06 | 0.007279608 |
| 1001.559982 | 319.409815 | 7.20863E-06 | 0.00721988  |
| 1001.599982 | 320.566527 | 7.23474E-06 | 0.007246315 |
| 1001.639982 | 316.643439 | 7.1462E-06  | 0.007157921 |
| 1001.679982 | 362.602463 | 8.18343E-06 | 0.008197181 |
| 1001.719982 | 422.23186  | 9.52918E-06 | 0.009545575 |
| 1001.759982 | 440.30834  | 9.93715E-06 | 0.009954635 |
| 1001.799982 | 415.931736 | 9.387E-06   | 0.009403896 |
| 1001.839982 | 375.931637 | 8.48425E-06 | 0.008499864 |
| 1001.879982 | 336.515662 | 7.59469E-06 | 0.007608968 |
| 1001.919982 | 308.76551  | 6.96841E-06 | 0.006981787 |



|             |            |             |             |
|-------------|------------|-------------|-------------|
| 1001.959982 | 307.026314 | 6.92916E-06 | 0.006942737 |
| 1001.999982 | 328.366477 | 7.41077E-06 | 0.007425595 |
| 1002.039982 | 370.423975 | 8.35995E-06 | 0.008377007 |
| 1002.079982 | 455.698539 | 1.02845E-05 | 0.010305873 |
| 1002.119982 | 554.08609  | 1.2505E-05  | 0.012531462 |
| 1002.159982 | 607.355252 | 1.37072E-05 | 0.013736769 |
| 1002.199982 | 670.739683 | 1.51377E-05 | 0.015170963 |
| 1002.239982 | 714.931427 | 1.6135E-05  | 0.016171149 |
| 1002.279982 | 712.847333 | 1.6088E-05  | 0.016124652 |
| 1002.319982 | 645.381086 | 1.45654E-05 | 0.014599144 |
| 1002.359982 | 539.317426 | 1.21716E-05 | 0.012200368 |
| 1002.399982 | 429.70272  | 9.69779E-06 | 0.009721066 |
| 1002.439982 | 358.64521  | 8.09412E-06 | 0.008113872 |
| 1002.479982 | 314.225624 | 7.09163E-06 | 0.007109222 |
| 1002.519982 | 331.9898   | 7.49255E-06 | 0.007511428 |
| 1002.559982 | 355.393479 | 8.02074E-06 | 0.008041269 |
| 1002.599982 | 356.618388 | 8.04838E-06 | 0.008069306 |
| 1002.639982 | 368.196499 | 8.30968E-06 | 0.00833162  |
| 1002.679982 | 357.027849 | 8.05762E-06 | 0.008079216 |
| 1002.719982 | 359.262297 | 8.10805E-06 | 0.008130103 |
| 1002.759982 | 391.099282 | 8.82657E-06 | 0.008850927 |
| 1002.799982 | 384.855741 | 8.68566E-06 | 0.008709978 |
| 1002.839982 | 386.217079 | 8.71638E-06 | 0.008741136 |
| 1002.879982 | 408.241054 | 9.21343E-06 | 0.009239966 |
| 1002.919982 | 404.800695 | 9.13579E-06 | 0.009162464 |
| 1002.959982 | 377.87589  | 8.52813E-06 | 0.008553376 |
| 1002.999982 | 380.701978 | 8.59191E-06 | 0.008617689 |
| 1003.039982 | 449.425236 | 1.01429E-05 | 0.010173736 |
| 1003.079982 | 548.605987 | 1.23813E-05 | 0.012419407 |
| 1003.119982 | 629.003849 | 1.41957E-05 | 0.014240031 |
| 1003.159982 | 735.888512 | 1.6608E-05  | 0.01666046  |
| 1003.199982 | 818.022821 | 1.84616E-05 | 0.018520713 |
| 1003.239982 | 798.335882 | 1.80173E-05 | 0.018075705 |
| 1003.279982 | 750.301525 | 1.69333E-05 | 0.016988801 |
| 1003.319982 | 678.224842 | 1.53066E-05 | 0.015357408 |
| 1003.359982 | 567.303751 | 1.28033E-05 | 0.012846274 |
| 1003.399982 | 466.628621 | 1.05312E-05 | 0.010566964 |
| 1003.439982 | 384.057224 | 8.66764E-06 | 0.008697453 |
| 1003.479982 | 347.540636 | 7.84351E-06 | 0.007870803 |
| 1003.519982 | 326.429768 | 7.36707E-06 | 0.007392997 |
| 1003.559982 | 305.456317 | 6.89372E-06 | 0.006918265 |
| 1003.599982 | 315.84508  | 7.12818E-06 | 0.007153845 |
| 1003.639982 | 344.15822  | 7.76717E-06 | 0.007795444 |
| 1003.679982 | 355.829213 | 8.03057E-06 | 0.008060122 |
| 1003.719982 | 339.657563 | 7.6656E-06  | 0.007694114 |
| 1003.759982 | 325.19203  | 7.33913E-06 | 0.007366726 |

|             |            |             |             |
|-------------|------------|-------------|-------------|
| 1003.799982 | 312.15777  | 7.04497E-06 | 0.007071737 |
| 1003.839982 | 289.007161 | 6.52249E-06 | 0.006547535 |
| 1003.879982 | 271.001204 | 6.11612E-06 | 0.00613985  |
| 1003.919982 | 274.288132 | 6.1903E-06  | 0.006214567 |
| 1003.959982 | 296.441187 | 6.69026E-06 | 0.006716758 |
| 1003.999982 | 327.298248 | 7.38667E-06 | 0.007416212 |
| 1004.039982 | 353.251524 | 7.97239E-06 | 0.008004603 |
| 1004.079982 | 417.575179 | 9.42409E-06 | 0.00946254  |
| 1004.119982 | 511.016997 | 1.15329E-05 | 0.011580457 |
| 1004.159982 | 552.728667 | 1.24743E-05 | 0.012526209 |
| 1004.199982 | 585.134076 | 1.32057E-05 | 0.013261125 |
| 1004.239982 | 601.719622 | 1.358E-05   | 0.013637553 |
| 1004.279982 | 594.465523 | 1.34163E-05 | 0.01347368  |
| 1004.319982 | 543.217887 | 1.22597E-05 | 0.012312633 |
| 1004.359982 | 476.957294 | 1.07643E-05 | 0.010811194 |
| 1004.399982 | 425.287947 | 9.59816E-06 | 0.009640388 |
| 1004.439982 | 359.662604 | 8.11708E-06 | 0.008153124 |
| 1004.479982 | 315.299494 | 7.11587E-06 | 0.007147749 |
| 1004.519982 | 322.970475 | 7.28899E-06 | 0.00732194  |
| 1004.559982 | 355.831653 | 8.03062E-06 | 0.008067244 |
| 1004.599982 | 350.572209 | 7.91193E-06 | 0.007948321 |
| 1004.639982 | 323.820351 | 7.30817E-06 | 0.007342084 |
| 1004.679982 | 323.905397 | 7.31009E-06 | 0.007344305 |
| 1004.719982 | 328.222601 | 7.40753E-06 | 0.00744249  |
| 1004.759982 | 315.388085 | 7.11787E-06 | 0.007151751 |
| 1004.799982 | 299.918117 | 6.76873E-06 | 0.006801224 |
| 1004.839982 | 300.6148   | 6.78446E-06 | 0.006817294 |
| 1004.879982 | 303.032229 | 6.83902E-06 | 0.00687239  |
| 1004.919982 | 326.43057  | 7.36708E-06 | 0.007403329 |
| 1004.959982 | 360.349536 | 8.13259E-06 | 0.008172925 |
| 1004.999982 | 382.538406 | 8.63336E-06 | 0.008676526 |
| 1005.039982 | 436.304279 | 9.84678E-06 | 0.009896407 |
| 1005.079982 | 515.183893 | 1.1627E-05  | 0.011686048 |
| 1005.119982 | 589.989024 | 1.33152E-05 | 0.013383404 |
| 1005.159982 | 659.164849 | 1.48764E-05 | 0.014953195 |
| 1005.199982 | 726.448779 | 1.63949E-05 | 0.01648019  |
| 1005.239982 | 773.184491 | 1.74497E-05 | 0.017541133 |
| 1005.279982 | 736.207277 | 1.66152E-05 | 0.016702901 |
| 1005.319982 | 654.187277 | 1.47641E-05 | 0.01484264  |
| 1005.359982 | 577.412435 | 1.30314E-05 | 0.013101242 |
| 1005.399982 | 500.761916 | 1.13015E-05 | 0.011362527 |
| 1005.439982 | 437.690933 | 9.87807E-06 | 0.009931811 |
| 1005.479982 | 344.143373 | 7.76684E-06 | 0.007809399 |
| 1005.519982 | 291.352498 | 6.57542E-06 | 0.006611716 |
| 1005.559982 | 291.288197 | 6.57397E-06 | 0.00661052  |
| 1005.599982 | 298.366878 | 6.73372E-06 | 0.006771434 |

|             |            |             |             |
|-------------|------------|-------------|-------------|
| 1005.639982 | 289.593999 | 6.53573E-06 | 0.006572595 |
| 1005.679982 | 282.600372 | 6.3779E-06  | 0.006414123 |
| 1005.719982 | 295.142436 | 6.66095E-06 | 0.006699054 |
| 1005.759982 | 313.510539 | 7.0755E-06  | 0.007116251 |
| 1005.799982 | 329.769213 | 7.44243E-06 | 0.007485598 |
| 1005.839982 | 331.407556 | 7.47941E-06 | 0.007523087 |
| 1005.879982 | 312.997344 | 7.06391E-06 | 0.00710545  |
| 1005.919982 | 302.832822 | 6.83451E-06 | 0.006874975 |
| 1005.959982 | 304.198794 | 6.86534E-06 | 0.00690626  |
| 1005.999982 | 330.852957 | 7.46689E-06 | 0.007511692 |
| 1006.039982 | 359.415879 | 8.11152E-06 | 0.008160509 |
| 1006.079982 | 396.699987 | 8.95297E-06 | 0.0090074   |
| 1006.119982 | 459.333646 | 1.03665E-05 | 0.010429964 |
| 1006.159982 | 529.058011 | 1.19401E-05 | 0.012013653 |
| 1006.199982 | 596.470001 | 1.34615E-05 | 0.013544958 |
| 1006.239982 | 647.099931 | 1.46041E-05 | 0.014695274 |
| 1006.279982 | 678.420204 | 1.5311E-05  | 0.015407152 |
| 1006.319982 | 624.839835 | 1.41018E-05 | 0.014190888 |
| 1006.359982 | 503.861998 | 1.13715E-05 | 0.011443786 |
| 1006.399982 | 404.648061 | 9.13234E-06 | 0.00919079  |
| 1006.439982 | 352.875872 | 7.96392E-06 | 0.008015204 |
| 1006.479982 | 344.763903 | 7.78084E-06 | 0.007831261 |
| 1006.519982 | 314.912062 | 7.10713E-06 | 0.007153465 |
| 1006.559982 | 283.810826 | 6.40522E-06 | 0.006447233 |
| 1006.599982 | 267.218739 | 6.03075E-06 | 0.006070558 |
| 1006.639982 | 294.947113 | 6.65655E-06 | 0.006700745 |
| 1006.679982 | 339.557867 | 7.66335E-06 | 0.007714539 |
| 1006.719982 | 348.602746 | 7.86748E-06 | 0.007920348 |
| 1006.759982 | 330.104603 | 7.45E-06    | 0.007500363 |
| 1006.799982 | 306.31513  | 6.91311E-06 | 0.006960115 |
| 1006.839982 | 295.362459 | 6.66592E-06 | 0.006711514 |
| 1006.879982 | 293.344892 | 6.62039E-06 | 0.006665934 |
| 1006.919982 | 311.219492 | 7.02379E-06 | 0.007072395 |
| 1006.959982 | 367.771644 | 8.30009E-06 | 0.008357862 |
| 1006.999982 | 401.633969 | 9.06432E-06 | 0.009127769 |
| 1007.039982 | 449.36374  | 1.01415E-05 | 0.01021291  |
| 1007.079982 | 521.573282 | 1.17712E-05 | 0.011854522 |
| 1007.119982 | 608.316512 | 1.37289E-05 | 0.013826606 |
| 1007.159982 | 696.598911 | 1.57213E-05 | 0.015833831 |
| 1007.199982 | 752.528039 | 1.69835E-05 | 0.017105791 |
| 1007.239982 | 765.539781 | 1.72772E-05 | 0.017402253 |
| 1007.279982 | 751.935831 | 1.69701E-05 | 0.017093687 |
| 1007.319982 | 682.202601 | 1.53964E-05 | 0.015509064 |
| 1007.359982 | 593.752162 | 1.34002E-05 | 0.013498784 |
| 1007.399982 | 493.046981 | 1.11274E-05 | 0.011209726 |
| 1007.439982 | 429.49853  | 9.69318E-06 | 0.009765301 |

|             |            |             |             |
|-------------|------------|-------------|-------------|
| 1007.479982 | 368.427299 | 8.31489E-06 | 0.008377086 |
| 1007.519982 | 312.765668 | 7.05869E-06 | 0.007111767 |
| 1007.559982 | 298.672333 | 6.74062E-06 | 0.006791577 |
| 1007.599982 | 301.469046 | 6.80374E-06 | 0.006855445 |
| 1007.639982 | 310.54593  | 7.00859E-06 | 0.007062135 |
| 1007.679982 | 336.694619 | 7.59873E-06 | 0.007657087 |
| 1007.719982 | 340.930474 | 7.69433E-06 | 0.007753726 |
| 1007.759982 | 321.719299 | 7.26076E-06 | 0.0073171   |
| 1007.799982 | 280.492045 | 6.33031E-06 | 0.006379691 |
| 1007.839982 | 268.384064 | 6.05705E-06 | 0.006104542 |
| 1007.879982 | 298.748536 | 6.74234E-06 | 0.006795468 |
| 1007.919982 | 321.127145 | 7.24739E-06 | 0.007304792 |
| 1007.959982 | 311.790276 | 7.03667E-06 | 0.007092684 |
| 1007.999982 | 322.327408 | 7.27448E-06 | 0.007332676 |
| 1008.039982 | 368.651732 | 8.31996E-06 | 0.008386848 |
| 1008.079982 | 436.674431 | 9.85513E-06 | 0.009934763 |
| 1008.119982 | 502.654375 | 1.13442E-05 | 0.011436324 |
| 1008.159982 | 597.472568 | 1.34841E-05 | 0.013594154 |
| 1008.199982 | 688.600157 | 1.55407E-05 | 0.01566818  |
| 1008.239982 | 758.301943 | 1.71138E-05 | 0.017254836 |
| 1008.279982 | 792.771806 | 1.78918E-05 | 0.018039899 |
| 1008.319982 | 759.102635 | 1.71319E-05 | 0.017274426 |
| 1008.359982 | 625.65174  | 1.41201E-05 | 0.014238132 |
| 1008.399982 | 503.155995 | 1.13555E-05 | 0.011450916 |
| 1008.439982 | 433.986109 | 9.79446E-06 | 0.009877127 |
| 1008.479982 | 381.85628  | 8.61796E-06 | 0.008691045 |
| 1008.519982 | 314.102975 | 7.08887E-06 | 0.007149264 |
| 1008.559982 | 275.408226 | 6.21558E-06 | 0.006268785 |
| 1008.599982 | 277.423651 | 6.26107E-06 | 0.00631491  |
| 1008.639982 | 314.116756 | 7.08918E-06 | 0.007150428 |
| 1008.679982 | 339.308244 | 7.65771E-06 | 0.007724183 |
| 1008.719982 | 323.629581 | 7.30387E-06 | 0.007367558 |
| 1008.759982 | 319.837014 | 7.21828E-06 | 0.007281508 |
| 1008.799982 | 321.948088 | 7.26592E-06 | 0.00732986  |
| 1008.839982 | 332.956239 | 7.51436E-06 | 0.007580785 |
| 1008.879982 | 364.908665 | 8.23548E-06 | 0.008308611 |
| 1008.919982 | 372.962079 | 8.41723E-06 | 0.008492316 |
| 1008.959982 | 374.817665 | 8.45911E-06 | 0.008534906 |
| 1008.999982 | 408.56306  | 9.2207E-06  | 0.009303685 |
| 1009.039982 | 505.615938 | 1.1411E-05  | 0.011514203 |
| 1009.079982 | 598.962196 | 1.35177E-05 | 0.013640483 |
| 1009.119982 | 700.90088  | 1.58184E-05 | 0.01596262  |
| 1009.159982 | 769.430106 | 1.7365E-05  | 0.017524029 |
| 1009.199982 | 818.063281 | 1.84625E-05 | 0.018632404 |
| 1009.239982 | 835.485132 | 1.88557E-05 | 0.019029962 |
| 1009.279982 | 766.911002 | 1.73081E-05 | 0.017468732 |

|             |            |             |             |
|-------------|------------|-------------|-------------|
| 1009.319982 | 682.391777 | 1.54006E-05 | 0.015544166 |
| 1009.359982 | 596.750805 | 1.34678E-05 | 0.013593893 |
| 1009.399982 | 507.604709 | 1.14559E-05 | 0.011563617 |
| 1009.439982 | 436.721919 | 9.85621E-06 | 0.009949248 |
| 1009.479982 | 413.535612 | 9.33292E-06 | 0.009421399 |
| 1009.519982 | 393.812692 | 8.8878E-06  | 0.008972416 |
| 1009.559982 | 371.245287 | 8.37849E-06 | 0.008458587 |
| 1009.599982 | 383.877738 | 8.66359E-06 | 0.008746756 |
| 1009.639982 | 410.754653 | 9.27016E-06 | 0.009359525 |
| 1009.679982 | 407.604591 | 9.19907E-06 | 0.009288115 |
| 1009.719982 | 375.843507 | 8.48226E-06 | 0.008564712 |
| 1009.759982 | 335.60133  | 7.57405E-06 | 0.007647977 |
| 1009.799982 | 309.926836 | 6.99462E-06 | 0.007063164 |
| 1009.839982 | 309.964793 | 6.99547E-06 | 0.007064309 |
| 1009.879982 | 316.161532 | 7.13533E-06 | 0.007205822 |
| 1009.919982 | 316.075086 | 7.13337E-06 | 0.007204137 |
| 1009.959982 | 330.464498 | 7.45812E-06 | 0.007532406 |
| 1009.999982 | 355.368801 | 8.02018E-06 | 0.00810038  |
| 1010.039982 | 411.133587 | 9.27871E-06 | 0.009371871 |
| 1010.079982 | 476.701413 | 1.07585E-05 | 0.010866932 |
| 1010.119982 | 540.888737 | 1.22071E-05 | 0.012330641 |
| 1010.159982 | 642.568248 | 1.45019E-05 | 0.014649209 |
| 1010.199982 | 691.921946 | 1.56157E-05 | 0.015774995 |
| 1010.239982 | 686.352829 | 1.549E-05   | 0.015648645 |
| 1010.279982 | 683.452028 | 1.54246E-05 | 0.015583125 |
| 1010.319982 | 606.237111 | 1.36819E-05 | 0.013823124 |
| 1010.359982 | 507.213723 | 1.14471E-05 | 0.011565699 |
| 1010.399982 | 430.963033 | 9.72624E-06 | 0.009827388 |
| 1010.439982 | 387.104183 | 8.7364E-06  | 0.00882761  |
| 1010.479982 | 360.284758 | 8.13113E-06 | 0.008216339 |
| 1010.519982 | 357.246604 | 8.06256E-06 | 0.008147376 |
| 1010.559982 | 364.178693 | 8.21901E-06 | 0.008305798 |
| 1010.599982 | 368.807713 | 8.32348E-06 | 0.008411705 |
| 1010.639982 | 375.243861 | 8.46873E-06 | 0.008558838 |
| 1010.679982 | 357.816834 | 8.07543E-06 | 0.008161673 |
| 1010.719982 | 336.641163 | 7.59752E-06 | 0.007678967 |
| 1010.759982 | 326.144644 | 7.36063E-06 | 0.007439831 |
| 1010.799982 | 314.735857 | 7.10315E-06 | 0.007179864 |
| 1010.839982 | 302.91856  | 6.83645E-06 | 0.006910557 |
| 1010.879982 | 307.190148 | 6.93285E-06 | 0.007008283 |
| 1010.919982 | 320.682302 | 7.23735E-06 | 0.007316385 |
| 1010.959982 | 355.188056 | 8.0161E-06  | 0.008103956 |
| 1010.999982 | 419.483655 | 9.46716E-06 | 0.0095713   |
| 1011.039982 | 477.596205 | 1.07787E-05 | 0.010897678 |
| 1011.079982 | 552.075469 | 1.24596E-05 | 0.012597626 |
| 1011.119982 | 622.976157 | 1.40597E-05 | 0.014216048 |

|             |            |             |             |
|-------------|------------|-------------|-------------|
| 1011.159982 | 711.7534   | 1.60633E-05 | 0.016242549 |
| 1011.199982 | 817.686955 | 1.84541E-05 | 0.018660741 |
| 1011.239982 | 831.203628 | 1.87591E-05 | 0.01896996  |
| 1011.279982 | 761.037511 | 1.71756E-05 | 0.017369297 |
| 1011.319982 | 673.390233 | 1.51975E-05 | 0.015369515 |
| 1011.359982 | 599.442955 | 1.35286E-05 | 0.013682277 |
| 1011.399982 | 497.895166 | 1.12368E-05 | 0.0113649   |
| 1011.439982 | 392.062337 | 8.8483E-06  | 0.008949525 |
| 1011.479982 | 341.805985 | 7.71408E-06 | 0.007802643 |
| 1011.519982 | 308.21852  | 6.95606E-06 | 0.007036196 |
| 1011.559982 | 306.248491 | 6.9116E-06  | 0.0069915   |
| 1011.599982 | 308.172898 | 6.95503E-06 | 0.007035711 |
| 1011.639982 | 300.922485 | 6.7914E-06  | 0.006870453 |
| 1011.679982 | 313.049122 | 7.06508E-06 | 0.007147603 |
| 1011.719982 | 326.765484 | 7.37464E-06 | 0.007461072 |
| 1011.759982 | 316.148589 | 7.13503E-06 | 0.007218941 |
| 1011.799982 | 296.920602 | 6.70108E-06 | 0.006780157 |
| 1011.839982 | 264.464988 | 5.96861E-06 | 0.006039275 |
| 1011.879982 | 234.116793 | 5.28369E-06 | 0.00534646  |
| 1011.919982 | 255.11866  | 5.75767E-06 | 0.005826304 |
| 1011.959982 | 304.20363  | 6.86545E-06 | 0.006947563 |
| 1011.999982 | 340.759949 | 7.69048E-06 | 0.007782763 |
| 1012.039982 | 417.028271 | 9.41175E-06 | 0.009525064 |
| 1012.079982 | 496.650088 | 1.12087E-05 | 0.011344102 |
| 1012.119982 | 568.319529 | 1.28262E-05 | 0.012981633 |
| 1012.159982 | 615.020054 | 1.38801E-05 | 0.014048928 |
| 1012.199982 | 623.880299 | 1.40801E-05 | 0.014251886 |
| 1012.239982 | 620.245679 | 1.39981E-05 | 0.014169417 |
| 1012.279982 | 613.838132 | 1.38535E-05 | 0.014023592 |
| 1012.319982 | 569.44778  | 1.28516E-05 | 0.013009975 |
| 1012.359982 | 515.836437 | 1.16417E-05 | 0.011785601 |
| 1012.399982 | 476.373588 | 1.07511E-05 | 0.010884402 |
| 1012.439982 | 414.581255 | 9.35652E-06 | 0.009472916 |
| 1012.479982 | 335.99562  | 7.58295E-06 | 0.007677588 |
| 1012.519982 | 280.938935 | 6.3404E-06  | 0.006419782 |
| 1012.559982 | 265.111344 | 5.98319E-06 | 0.006058343 |
| 1012.599982 | 270.542476 | 6.10577E-06 | 0.006182699 |
| 1012.639982 | 289.250927 | 6.52799E-06 | 0.006610504 |
| 1012.679982 | 307.305084 | 6.93545E-06 | 0.007023389 |
| 1012.719982 | 310.248949 | 7.00189E-06 | 0.007090951 |
| 1012.759982 | 322.093321 | 7.2692E-06  | 0.007361952 |
| 1012.799982 | 337.034263 | 7.60639E-06 | 0.007703756 |
| 1012.839982 | 347.898312 | 7.85158E-06 | 0.007952394 |
| 1012.879982 | 327.815722 | 7.39834E-06 | 0.007493635 |
| 1012.919982 | 308.944877 | 6.97246E-06 | 0.00706254  |
| 1012.959982 | 321.093545 | 7.24663E-06 | 0.00734055  |

|             |             |             |             |
|-------------|-------------|-------------|-------------|
| 1012.999982 | 375.184509  | 8.46739E-06 | 0.008577468 |
| 1013.039982 | 447.628232  | 1.01023E-05 | 0.01023408  |
| 1013.079982 | 540.666823  | 1.22021E-05 | 0.0123617   |
| 1013.119982 | 672.817823  | 1.51846E-05 | 0.015383782 |
| 1013.159982 | 818.655143  | 1.84759E-05 | 0.018719049 |
| 1013.199982 | 911.911903  | 2.05806E-05 | 0.020852245 |
| 1013.239982 | 984.648318  | 2.22221E-05 | 0.022516362 |
| 1013.279982 | 1000.010739 | 2.25688E-05 | 0.022868563 |
| 1013.319982 | 925.74034   | 2.08927E-05 | 0.02117096  |
| 1013.359982 | 762.149934  | 1.72007E-05 | 0.017430463 |
| 1013.399982 | 596.961807  | 1.34726E-05 | 0.013653129 |
| 1013.439982 | 485.30955   | 1.09528E-05 | 0.011099965 |
| 1013.479982 | 388.730006  | 8.77309E-06 | 0.008891356 |
| 1013.519982 | 328.918643  | 7.42324E-06 | 0.007523598 |
| 1013.559982 | 311.962709  | 7.04056E-06 | 0.007136034 |
| 1013.599982 | 309.786887  | 6.99146E-06 | 0.007086542 |
| 1013.639982 | 285.024414  | 6.4326E-06  | 0.006520345 |
| 1013.679982 | 264.842193  | 5.97712E-06 | 0.006058886 |
| 1013.719982 | 290.705101  | 6.56081E-06 | 0.006650823 |
| 1013.759982 | 324.570151  | 7.3251E-06  | 0.007425889 |
| 1013.799982 | 298.903082  | 6.74583E-06 | 0.006838919 |
| 1013.839982 | 289.291464  | 6.52891E-06 | 0.006619265 |
| 1013.879982 | 311.699062  | 7.03461E-06 | 0.007132254 |
| 1013.919982 | 308.137129  | 6.95423E-06 | 0.007051029 |
| 1013.959982 | 305.290898  | 6.88999E-06 | 0.006986174 |
| 1013.999982 | 298.656138  | 6.74025E-06 | 0.006834616 |
| 1014.039982 | 324.967482  | 7.33406E-06 | 0.007437034 |
| 1014.079982 | 394.274135  | 8.89822E-06 | 0.009023505 |
| 1014.119982 | 479.431782  | 1.08201E-05 | 0.010972887 |
| 1014.159982 | 561.196757  | 1.26654E-05 | 0.012844771 |
| 1014.199982 | 638.454954  | 1.4409E-05  | 0.014613647 |
| 1014.239982 | 691.018393  | 1.55953E-05 | 0.0158174   |
| 1014.279982 | 693.078832  | 1.56418E-05 | 0.015865189 |
| 1014.319982 | 637.276458  | 1.43824E-05 | 0.014588398 |
| 1014.359982 | 545.357317  | 1.2308E-05  | 0.012484697 |
| 1014.399982 | 449.484585  | 1.01442E-05 | 0.010290318 |
| 1014.439982 | 386.240463  | 8.71691E-06 | 0.008842781 |
| 1014.479982 | 340.849629  | 7.6925E-06  | 0.007803889 |
| 1014.519982 | 314.291224  | 7.09312E-06 | 0.007196107 |
| 1014.559982 | 344.262653  | 7.76953E-06 | 0.007882653 |
| 1014.599982 | 377.176052  | 8.51234E-06 | 0.008636618 |
| 1014.639982 | 376.922496  | 8.50662E-06 | 0.008631152 |
| 1014.679982 | 355.397616  | 8.02083E-06 | 0.008138575 |
| 1014.719982 | 348.033565  | 7.85463E-06 | 0.007970253 |
| 1014.759982 | 339.474768  | 7.66147E-06 | 0.007774556 |
| 1014.799982 | 337.7816    | 7.62326E-06 | 0.007736084 |

|             |            |             |             |
|-------------|------------|-------------|-------------|
| 1014.839982 | 345.854282 | 7.80545E-06 | 0.007921282 |
| 1014.879982 | 351.558587 | 7.93419E-06 | 0.008052248 |
| 1014.919982 | 361.359121 | 8.15537E-06 | 0.00827705  |
| 1014.959982 | 375.154696 | 8.46672E-06 | 0.008593381 |
| 1014.999982 | 409.472725 | 9.24123E-06 | 0.009379847 |
| 1015.039982 | 512.427295 | 1.15648E-05 | 0.011738704 |
| 1015.079982 | 623.585074 | 1.40734E-05 | 0.014285674 |
| 1015.119982 | 689.14787  | 1.55531E-05 | 0.01578827  |
| 1015.159982 | 766.168147 | 1.72913E-05 | 0.017553484 |
| 1015.199982 | 854.439526 | 1.92835E-05 | 0.019576619 |
| 1015.239982 | 873.704391 | 1.97183E-05 | 0.020018798 |
| 1015.279982 | 814.632494 | 1.83851E-05 | 0.018666045 |
| 1015.319982 | 701.623182 | 1.58347E-05 | 0.016077245 |
| 1015.359982 | 588.278624 | 1.32766E-05 | 0.013480558 |
| 1015.399982 | 520.238265 | 1.17411E-05 | 0.011921865 |
| 1015.439982 | 456.277583 | 1.02975E-05 | 0.010456543 |
| 1015.479982 | 377.434616 | 8.51817E-06 | 0.008650035 |
| 1015.519982 | 323.953541 | 7.31118E-06 | 0.00742465  |
| 1015.559982 | 293.136545 | 6.61568E-06 | 0.006718623 |
| 1015.599982 | 271.500255 | 6.12738E-06 | 0.00622297  |
| 1015.639982 | 293.857436 | 6.63195E-06 | 0.006735677 |
| 1015.679982 | 301.096413 | 6.79533E-06 | 0.006901877 |
| 1015.719982 | 286.621181 | 6.46864E-06 | 0.006570328 |
| 1015.759982 | 299.08865  | 6.75001E-06 | 0.006856394 |
| 1015.799982 | 311.396697 | 7.02779E-06 | 0.007138829 |
| 1015.839982 | 297.634109 | 6.71719E-06 | 0.006823587 |
| 1015.879982 | 283.15301  | 6.39037E-06 | 0.006491848 |
| 1015.919982 | 275.3976   | 6.21534E-06 | 0.006314288 |
| 1015.959982 | 294.219966 | 6.64013E-06 | 0.006746111 |
| 1015.999982 | 328.655701 | 7.4173E-06  | 0.007535978 |
| 1016.039982 | 368.714805 | 8.32138E-06 | 0.008454854 |
| 1016.079982 | 442.59071  | 9.98866E-06 | 0.010149273 |
| 1016.119982 | 500.924128 | 1.13052E-05 | 0.011487399 |
| 1016.159982 | 542.492765 | 1.22433E-05 | 0.012441158 |
| 1016.199982 | 579.959522 | 1.30889E-05 | 0.013300918 |
| 1016.239982 | 587.23174  | 1.3253E-05  | 0.013468231 |
| 1016.279982 | 606.862792 | 1.3696E-05  | 0.013919019 |
| 1016.319982 | 567.363336 | 1.28046E-05 | 0.013013571 |
| 1016.359982 | 509.213031 | 1.14922E-05 | 0.011680241 |
| 1016.399982 | 472.348439 | 1.06602E-05 | 0.010835074 |
| 1016.439982 | 397.196551 | 8.96417E-06 | 0.009111544 |
| 1016.479982 | 323.352467 | 7.29761E-06 | 0.007417879 |
| 1016.519982 | 294.030741 | 6.63586E-06 | 0.006745489 |
| 1016.559982 | 299.601308 | 6.76158E-06 | 0.006873556 |
| 1016.599982 | 328.267547 | 7.40854E-06 | 0.007531523 |
| 1016.639982 | 319.228838 | 7.20455E-06 | 0.007324434 |



|             |            |             |             |
|-------------|------------|-------------|-------------|
| 1016.679982 | 325.910943 | 7.35536E-06 | 0.007478043 |
| 1016.719982 | 349.484804 | 7.88739E-06 | 0.008019262 |
| 1016.759982 | 354.789327 | 8.0071E-06  | 0.0081413   |
| 1016.799982 | 356.71313  | 8.05052E-06 | 0.008185767 |
| 1016.839982 | 363.722943 | 8.20872E-06 | 0.008346955 |
| 1016.879982 | 360.912411 | 8.14529E-06 | 0.008282783 |
| 1016.919982 | 373.050391 | 8.41923E-06 | 0.008561681 |
| 1016.959982 | 392.164688 | 8.85061E-06 | 0.009000717 |
| 1016.999982 | 403.445146 | 9.10519E-06 | 0.009259983 |
| 1017.039982 | 440.873909 | 9.94991E-06 | 0.010119456 |
| 1017.079982 | 524.329464 | 1.18334E-05 | 0.0120355   |
| 1017.119982 | 599.179592 | 1.35226E-05 | 0.013754156 |
| 1017.159982 | 659.590349 | 1.4886E-05  | 0.01514148  |
| 1017.199982 | 704.81063  | 1.59066E-05 | 0.016180187 |
| 1017.239982 | 726.590854 | 1.63981E-05 | 0.016680847 |
| 1017.279982 | 734.575141 | 1.65783E-05 | 0.016864811 |
| 1017.319982 | 699.033976 | 1.57762E-05 | 0.016049467 |
| 1017.359982 | 583.266916 | 1.31635E-05 | 0.01339204  |
| 1017.399982 | 457.28508  | 1.03203E-05 | 0.01049986  |
| 1017.439982 | 389.801699 | 8.79728E-06 | 0.008950706 |
| 1017.479982 | 338.755555 | 7.64524E-06 | 0.00777888  |
| 1017.519982 | 296.065543 | 6.68179E-06 | 0.006798852 |
| 1017.559982 | 279.30749  | 6.30358E-06 | 0.006414272 |
| 1017.599982 | 289.19752  | 6.52679E-06 | 0.006641657 |
| 1017.639982 | 296.538636 | 6.69246E-06 | 0.006810519 |
| 1017.679982 | 298.354913 | 6.73345E-06 | 0.006852502 |
| 1017.719982 | 305.14405  | 6.88668E-06 | 0.007008708 |
| 1017.759982 | 319.373587 | 7.20782E-06 | 0.007335828 |
| 1017.799982 | 309.575273 | 6.98668E-06 | 0.007111046 |
| 1017.839982 | 286.375099 | 6.46309E-06 | 0.006578388 |
| 1017.879982 | 282.682475 | 6.37975E-06 | 0.00649382  |
| 1017.919982 | 291.266438 | 6.57348E-06 | 0.006691274 |
| 1017.959982 | 300.804031 | 6.78873E-06 | 0.006910653 |
| 1017.999982 | 335.772007 | 7.57791E-06 | 0.007714309 |
| 1018.039982 | 390.621686 | 8.81579E-06 | 0.008974824 |
| 1018.079982 | 425.645513 | 9.60623E-06 | 0.009779907 |
| 1018.119982 | 463.860642 | 1.04687E-05 | 0.010658381 |
| 1018.159982 | 567.563316 | 1.28091E-05 | 0.013041727 |
| 1018.199982 | 645.626372 | 1.45709E-05 | 0.014836078 |
| 1018.239982 | 610.331901 | 1.37743E-05 | 0.014025585 |
| 1018.279982 | 558.532835 | 1.26053E-05 | 0.012835733 |
| 1018.319982 | 490.770036 | 1.1076E-05  | 0.011278908 |
| 1018.359982 | 415.06905  | 9.36753E-06 | 0.009539518 |
| 1018.399982 | 372.050704 | 8.39667E-06 | 0.008551165 |
| 1018.439982 | 364.500992 | 8.22628E-06 | 0.008377972 |
| 1018.479982 | 346.862912 | 7.82821E-06 | 0.007972878 |

|             |            |             |             |
|-------------|------------|-------------|-------------|
| 1018.519982 | 343.357768 | 7.74911E-06 | 0.00789262  |
| 1018.559982 | 350.435246 | 7.90884E-06 | 0.008055623 |
| 1018.599982 | 344.904771 | 7.78402E-06 | 0.007928803 |
| 1018.639982 | 341.853082 | 7.71515E-06 | 0.007858958 |
| 1018.679982 | 337.353057 | 7.61359E-06 | 0.00775581  |
| 1018.719982 | 312.098413 | 7.04363E-06 | 0.007175483 |
| 1018.759982 | 284.353006 | 6.41745E-06 | 0.006537843 |
| 1018.799982 | 244.117156 | 5.50938E-06 | 0.005612961 |
| 1018.839982 | 244.823836 | 5.52533E-06 | 0.00562943  |
| 1018.879982 | 269.556228 | 6.08351E-06 | 0.006198365 |
| 1018.919982 | 274.569507 | 6.19665E-06 | 0.006313892 |
| 1018.959982 | 335.259791 | 7.56635E-06 | 0.007709804 |
| 1018.999982 | 410.145482 | 9.25641E-06 | 0.009432284 |
| 1019.039982 | 476.336054 | 1.07502E-05 | 0.010954926 |
| 1019.079982 | 553.662522 | 1.24954E-05 | 0.012733804 |
| 1019.119982 | 641.745048 | 1.44833E-05 | 0.014760212 |
| 1019.159982 | 686.964261 | 1.55038E-05 | 0.01580088  |
| 1019.199982 | 660.201122 | 1.48998E-05 | 0.015185896 |
| 1019.239982 | 630.395066 | 1.42271E-05 | 0.014500868 |
| 1019.279982 | 592.679582 | 1.3376E-05  | 0.013633841 |
| 1019.319982 | 534.933858 | 1.20727E-05 | 0.012305957 |
| 1019.359982 | 474.630554 | 1.07118E-05 | 0.01091913  |
| 1019.399982 | 415.915807 | 9.38664E-06 | 0.009568741 |
| 1019.439982 | 356.648644 | 8.04906E-06 | 0.008205537 |
| 1019.479982 | 319.438146 | 7.20927E-06 | 0.007349711 |
| 1019.519982 | 294.700742 | 6.65099E-06 | 0.006780812 |
| 1019.559982 | 292.129956 | 6.59297E-06 | 0.006721925 |
| 1019.599982 | 306.469978 | 6.9166E-06  | 0.007052166 |
| 1019.639982 | 341.78766  | 7.71367E-06 | 0.007865168 |
| 1019.679982 | 323.541447 | 7.30188E-06 | 0.007445581 |
| 1019.719982 | 291.614266 | 6.58133E-06 | 0.006711111 |
| 1019.759982 | 318.078928 | 7.1786E-06  | 0.007320447 |
| 1019.799982 | 338.040604 | 7.62911E-06 | 0.007780162 |
| 1019.839982 | 311.303413 | 7.02568E-06 | 0.007165074 |
| 1019.879982 | 275.560408 | 6.21901E-06 | 0.006342648 |
| 1019.919982 | 267.189142 | 6.03009E-06 | 0.006150206 |
| 1019.959982 | 301.52476  | 6.80499E-06 | 0.006940821 |
| 1019.999982 | 333.050048 | 7.51648E-06 | 0.007666805 |
| 1020.039982 | 372.147941 | 8.39886E-06 | 0.008567174 |
| 1020.079982 | 394.100094 | 8.89429E-06 | 0.009072887 |
| 1020.119982 | 434.534318 | 9.80683E-06 | 0.010004148 |
| 1020.159982 | 467.432931 | 1.05493E-05 | 0.010761984 |
| 1020.199982 | 498.745738 | 1.1256E-05  | 0.011483368 |
| 1020.239982 | 524.150085 | 1.18293E-05 | 0.012068763 |
| 1020.279982 | 522.688196 | 1.17963E-05 | 0.012035574 |
| 1020.319982 | 487.184667 | 1.09951E-05 | 0.011218499 |

|             |            |             |             |
|-------------|------------|-------------|-------------|
| 1020.359982 | 444.948092 | 1.00419E-05 | 0.010246311 |
| 1020.399982 | 398.431785 | 8.99205E-06 | 0.009175488 |
| 1020.439982 | 345.880229 | 7.80603E-06 | 0.00796559  |
| 1020.479982 | 303.779074 | 6.85587E-06 | 0.006996279 |
| 1020.519982 | 261.248998 | 5.89603E-06 | 0.006017012 |
| 1020.559982 | 250.48208  | 5.65303E-06 | 0.005769258 |
| 1020.599982 | 250.933746 | 5.66323E-06 | 0.005779887 |
| 1020.639982 | 252.602373 | 5.70088E-06 | 0.00581855  |
| 1020.679982 | 262.491613 | 5.92407E-06 | 0.00604658  |
| 1020.719982 | 278.89238  | 6.29421E-06 | 0.006424629 |
| 1020.759982 | 273.172424 | 6.16512E-06 | 0.006293109 |
| 1020.799982 | 261.561451 | 5.90308E-06 | 0.006025862 |
| 1020.839982 | 259.094924 | 5.84741E-06 | 0.005969271 |
| 1020.879982 | 277.403165 | 6.2606E-06  | 0.006391324 |
| 1020.919982 | 319.006946 | 7.19954E-06 | 0.007350157 |
| 1020.959982 | 377.603486 | 8.52198E-06 | 0.008700605 |
| 1020.999982 | 407.565951 | 9.1982E-06  | 0.009391358 |
| 1021.039982 | 424.370053 | 9.57744E-06 | 0.00977895  |
| 1021.079982 | 482.102145 | 1.08804E-05 | 0.011109732 |
| 1021.119982 | 580.952959 | 1.31113E-05 | 0.013388209 |
| 1021.159982 | 653.990338 | 1.47597E-05 | 0.015071965 |
| 1021.199982 | 720.108935 | 1.62519E-05 | 0.016596395 |
| 1021.239982 | 786.484855 | 1.77499E-05 | 0.018126875 |
| 1021.279982 | 789.139472 | 1.78098E-05 | 0.01818877  |
| 1021.319982 | 697.769877 | 1.57477E-05 | 0.016083435 |
| 1021.359982 | 575.517954 | 1.29886E-05 | 0.013266076 |
| 1021.399982 | 470.981382 | 1.06294E-05 | 0.010856863 |
| 1021.439982 | 395.419648 | 8.92407E-06 | 0.009115403 |
| 1021.479982 | 324.487059 | 7.32322E-06 | 0.007480524 |
| 1021.519982 | 270.628074 | 6.1077E-06  | 0.006239136 |
| 1021.559982 | 251.079536 | 5.66652E-06 | 0.005788685 |
| 1021.599982 | 257.514674 | 5.81175E-06 | 0.005937281 |
| 1021.639982 | 286.285675 | 6.46107E-06 | 0.006600886 |
| 1021.679982 | 311.23862  | 7.02422E-06 | 0.007176507 |
| 1021.719982 | 307.762674 | 6.94577E-06 | 0.007096637 |
| 1021.759982 | 304.913151 | 6.88147E-06 | 0.007031206 |
| 1021.799982 | 301.177697 | 6.79716E-06 | 0.006945339 |
| 1021.839982 | 288.690081 | 6.51533E-06 | 0.006657628 |
| 1021.879982 | 273.465183 | 6.17173E-06 | 0.006306766 |
| 1021.919982 | 270.748163 | 6.11041E-06 | 0.006244349 |
| 1021.959982 | 293.25513  | 6.61836E-06 | 0.006763699 |
| 1021.999982 | 326.908125 | 7.37786E-06 | 0.007540174 |
| 1022.039982 | 376.299827 | 8.49256E-06 | 0.008679739 |
| 1022.079982 | 458.224249 | 1.03415E-05 | 0.010569823 |
| 1022.119982 | 524.123271 | 1.18287E-05 | 0.012090384 |
| 1022.159982 | 538.645485 | 1.21565E-05 | 0.012425866 |

|             |            |             |             |
|-------------|------------|-------------|-------------|
| 1022.199982 | 521.024317 | 1.17588E-05 | 0.012019838 |
| 1022.239982 | 534.906671 | 1.20721E-05 | 0.012340582 |
| 1022.279982 | 542.312994 | 1.22392E-05 | 0.012511939 |
| 1022.319982 | 506.608077 | 1.14334E-05 | 0.011688633 |
| 1022.359982 | 437.243802 | 9.86798E-06 | 0.010088632 |
| 1022.399982 | 372.87035  | 8.41516E-06 | 0.008603664 |
| 1022.439982 | 320.458201 | 7.2323E-06  | 0.007394588 |
| 1022.479982 | 269.740603 | 6.08767E-06 | 0.00622452  |
| 1022.519982 | 276.701087 | 6.24476E-06 | 0.00638539  |
| 1022.559982 | 288.580354 | 6.51286E-06 | 0.006659787 |
| 1022.599982 | 305.700316 | 6.89923E-06 | 0.007055153 |
| 1022.639982 | 325.026536 | 7.3354E-06  | 0.007501469 |
| 1022.679982 | 312.856108 | 7.06073E-06 | 0.007220864 |
| 1022.719982 | 278.002739 | 6.27413E-06 | 0.006416683 |
| 1022.759982 | 271.788176 | 6.13388E-06 | 0.006273488 |
| 1022.799982 | 285.283216 | 6.43844E-06 | 0.006585241 |
| 1022.839982 | 280.315562 | 6.32633E-06 | 0.006470825 |
| 1022.879982 | 294.122085 | 6.63793E-06 | 0.006789801 |
| 1022.919982 | 289.683536 | 6.53775E-06 | 0.006687599 |
| 1022.959982 | 305.256943 | 6.88922E-06 | 0.0070474   |
| 1022.999982 | 335.02971  | 7.56115E-06 | 0.00773506  |
| 1023.039982 | 363.596361 | 8.20586E-06 | 0.008394926 |
| 1023.079982 | 458.64401  | 1.0351E-05  | 0.010589856 |
| 1023.119982 | 572.124446 | 1.29121E-05 | 0.013210578 |
| 1023.159982 | 654.778082 | 1.47774E-05 | 0.015119674 |
| 1023.199982 | 695.18815  | 1.56894E-05 | 0.016053423 |
| 1023.239982 | 701.850136 | 1.58398E-05 | 0.016207896 |
| 1023.279982 | 685.134554 | 1.54625E-05 | 0.0158225   |
| 1023.319982 | 625.591641 | 1.41187E-05 | 0.014447981 |
| 1023.359982 | 548.300469 | 1.23744E-05 | 0.012663443 |
| 1023.399982 | 459.737636 | 1.03756E-05 | 0.010618428 |
| 1023.439982 | 384.583086 | 8.6795E-06  | 0.008882952 |
| 1023.479982 | 335.02573  | 7.56106E-06 | 0.007738598 |
| 1023.519982 | 301.989543 | 6.81548E-06 | 0.006975783 |
| 1023.559982 | 285.941149 | 6.45329E-06 | 0.006605333 |
| 1023.599982 | 296.547413 | 6.69266E-06 | 0.006850609 |
| 1023.639982 | 316.793054 | 7.14958E-06 | 0.007318594 |
| 1023.679982 | 335.200465 | 7.56501E-06 | 0.007744147 |
| 1023.719982 | 324.648057 | 7.32685E-06 | 0.007500647 |
| 1023.759982 | 289.973547 | 6.5443E-06  | 0.006699791 |
| 1023.799982 | 248.372038 | 5.60541E-06 | 0.00573882  |
| 1023.839982 | 239.190828 | 5.3982E-06  | 0.005526897 |
| 1023.879982 | 239.560383 | 5.40654E-06 | 0.005535652 |
| 1023.919982 | 249.989522 | 5.64192E-06 | 0.00577687  |
| 1023.959982 | 278.989295 | 6.2964E-06  | 0.006447261 |
| 1023.999982 | 344.685084 | 7.77906E-06 | 0.00796576  |

|             |            |             |             |
|-------------|------------|-------------|-------------|
| 1024.039982 | 397.666947 | 8.97479E-06 | 0.009190543 |
| 1024.079982 | 445.715063 | 1.00592E-05 | 0.010301393 |
| 1024.119982 | 510.137487 | 1.15131E-05 | 0.011790788 |
| 1024.159982 | 571.989343 | 1.2909E-05  | 0.013220884 |
| 1024.199982 | 599.322932 | 1.35259E-05 | 0.01385321  |
| 1024.239982 | 573.307722 | 1.29388E-05 | 0.013252392 |
| 1024.279982 | 544.490158 | 1.22884E-05 | 0.012586746 |
| 1024.319982 | 535.919808 | 1.2095E-05  | 0.012389113 |
| 1024.359982 | 480.880819 | 1.08528E-05 | 0.011117185 |
| 1024.399982 | 419.196765 | 9.46069E-06 | 0.009691528 |
| 1024.439982 | 369.01196  | 8.32809E-06 | 0.008531624 |
| 1024.479982 | 313.363587 | 7.07218E-06 | 0.007245307 |
| 1024.519982 | 262.928396 | 5.93393E-06 | 0.006079427 |
| 1024.559982 | 267.654771 | 6.0406E-06  | 0.006188952 |
| 1024.599982 | 304.63834  | 6.87526E-06 | 0.007044394 |
| 1024.639982 | 320.711391 | 7.23801E-06 | 0.007416354 |
| 1024.679982 | 323.17834  | 7.29368E-06 | 0.007473693 |
| 1024.719982 | 332.006084 | 7.49291E-06 | 0.00767814  |
| 1024.759982 | 332.082508 | 7.49464E-06 | 0.007680207 |
| 1024.799982 | 317.163209 | 7.15793E-06 | 0.007335448 |
| 1024.839982 | 312.56446  | 7.05414E-06 | 0.007229369 |
| 1024.879982 | 302.726307 | 6.83211E-06 | 0.007002094 |
| 1024.919982 | 308.068574 | 6.95268E-06 | 0.007125939 |
| 1024.959982 | 348.330086 | 7.86132E-06 | 0.008057543 |
| 1024.999982 | 412.790905 | 9.31612E-06 | 0.009549018 |
| 1025.039982 | 456.375517 | 1.02998E-05 | 0.010557666 |
| 1025.079982 | 536.482954 | 1.21077E-05 | 0.012411333 |
| 1025.119982 | 619.510356 | 1.39815E-05 | 0.014332701 |
| 1025.159982 | 674.08599  | 1.52132E-05 | 0.015595945 |
| 1025.199982 | 703.757438 | 1.58828E-05 | 0.016283072 |
| 1025.239982 | 703.436012 | 1.58756E-05 | 0.01627627  |
| 1025.279982 | 693.900309 | 1.56604E-05 | 0.016056257 |
| 1025.319982 | 682.414561 | 1.54011E-05 | 0.015791103 |
| 1025.359982 | 614.2658   | 1.38631E-05 | 0.014214692 |
| 1025.399982 | 500.528511 | 1.12962E-05 | 0.011583155 |
| 1025.439982 | 422.050122 | 9.52508E-06 | 0.009767401 |
| 1025.479982 | 395.112893 | 8.91715E-06 | 0.009144356 |
| 1025.519982 | 387.413123 | 8.74337E-06 | 0.008966505 |
| 1025.559982 | 369.756747 | 8.34489E-06 | 0.00855819  |
| 1025.599982 | 367.237718 | 8.28804E-06 | 0.008500218 |
| 1025.639982 | 347.255507 | 7.83707E-06 | 0.008038016 |
| 1025.679982 | 320.190497 | 7.22625E-06 | 0.007411824 |
| 1025.719982 | 320.214492 | 7.2268E-06  | 0.007412668 |
| 1025.759982 | 309.568749 | 6.98654E-06 | 0.007166508 |
| 1025.799982 | 291.438623 | 6.57736E-06 | 0.00674706  |
| 1025.839982 | 269.301164 | 6.07775E-06 | 0.006234801 |

|             |            |             |             |
|-------------|------------|-------------|-------------|
| 1025.879982 | 246.940312 | 5.5731E-06  | 0.005717331 |
| 1025.919982 | 247.283873 | 5.58085E-06 | 0.005725508 |
| 1025.959982 | 283.794608 | 6.40485E-06 | 0.006571119 |
| 1025.999982 | 332.624523 | 7.50687E-06 | 0.007702051 |
| 1026.039982 | 373.9148   | 8.43874E-06 | 0.008658481 |
| 1026.079982 | 425.094916 | 9.5938E-06  | 0.009844006 |
| 1026.119982 | 484.206661 | 1.09279E-05 | 0.011213306 |
| 1026.159982 | 541.390316 | 1.22184E-05 | 0.012538059 |
| 1026.199982 | 617.590692 | 1.39382E-05 | 0.014303341 |
| 1026.239982 | 669.286402 | 1.51049E-05 | 0.015501213 |
| 1026.279982 | 624.794913 | 1.41008E-05 | 0.014471318 |
| 1026.319982 | 538.411576 | 1.21512E-05 | 0.012471019 |
| 1026.359982 | 438.33363  | 9.89258E-06 | 0.010153348 |
| 1026.399982 | 390.422917 | 8.8113E-06  | 0.00904392  |
| 1026.439982 | 374.33409  | 8.4482E-06  | 0.008671569 |
| 1026.479982 | 349.310204 | 7.88344E-06 | 0.008092198 |
| 1026.519982 | 346.493084 | 7.81987E-06 | 0.008027249 |
| 1026.559982 | 349.80177  | 7.89454E-06 | 0.008104218 |
| 1026.599982 | 351.984245 | 7.94379E-06 | 0.008155099 |
| 1026.639982 | 339.56528  | 7.66352E-06 | 0.007867671 |
| 1026.679982 | 316.401984 | 7.14075E-06 | 0.007331267 |
| 1026.719982 | 288.046402 | 6.50081E-06 | 0.006674507 |
| 1026.759982 | 271.680576 | 6.13145E-06 | 0.00629553  |
| 1026.799982 | 272.940295 | 6.15988E-06 | 0.006324967 |
| 1026.839982 | 275.146559 | 6.20967E-06 | 0.006376342 |
| 1026.879982 | 316.723054 | 7.148E-06   | 0.007340136 |
| 1026.919982 | 360.577831 | 8.13774E-06 | 0.008356807 |
| 1026.959982 | 368.800261 | 8.32331E-06 | 0.008547704 |
| 1026.999982 | 381.14852  | 8.60199E-06 | 0.008834245 |
| 1027.039982 | 426.048359 | 9.61532E-06 | 0.009875316 |
| 1027.079982 | 518.160616 | 1.16942E-05 | 0.012010841 |
| 1027.119982 | 611.138743 | 1.37926E-05 | 0.014166604 |
| 1027.159982 | 663.889662 | 1.49831E-05 | 0.015390005 |
| 1027.199982 | 667.015141 | 1.50536E-05 | 0.01546306  |
| 1027.239982 | 695.40953  | 1.56944E-05 | 0.01612194  |
| 1027.279982 | 712.26105  | 1.60747E-05 | 0.016513258 |
| 1027.319982 | 670.032299 | 1.51217E-05 | 0.01553482  |
| 1027.359982 | 589.474358 | 1.33036E-05 | 0.013667602 |
| 1027.399982 | 479.506383 | 1.08218E-05 | 0.011118308 |
| 1027.439982 | 374.995657 | 8.46313E-06 | 0.008695358 |
| 1027.479982 | 332.503402 | 7.50414E-06 | 0.007710352 |
| 1027.519982 | 324.767121 | 7.32954E-06 | 0.00753125  |
| 1027.559982 | 302.318706 | 6.82291E-06 | 0.007010951 |
| 1027.599982 | 280.499811 | 6.33049E-06 | 0.006505211 |
| 1027.639982 | 259.033932 | 5.84604E-06 | 0.006007619 |
| 1027.679981 | 250.870703 | 5.6618E-06  | 0.005818521 |

|             |            |             |             |
|-------------|------------|-------------|-------------|
| 1027.719981 | 264.031075 | 5.95881E-06 | 0.006123992 |
| 1027.759981 | 257.173909 | 5.80406E-06 | 0.005965177 |
| 1027.799981 | 261.393319 | 5.89928E-06 | 0.006063283 |
| 1027.839981 | 265.678876 | 5.996E-06   | 0.006162931 |
| 1027.879981 | 267.561322 | 6.03849E-06 | 0.006206839 |
| 1027.919981 | 285.209483 | 6.43678E-06 | 0.006616496 |
| 1027.959981 | 300.226306 | 6.77569E-06 | 0.006965138 |
| 1027.999981 | 293.790226 | 6.63044E-06 | 0.006816088 |
| 1028.039981 | 332.450963 | 7.50296E-06 | 0.007713338 |
| 1028.079981 | 400.721129 | 9.04372E-06 | 0.009297665 |
| 1028.119981 | 437.51495  | 9.8741E-06  | 0.010151763 |
| 1028.159981 | 510.507292 | 1.15214E-05 | 0.011845882 |
| 1028.199981 | 604.484999 | 1.36424E-05 | 0.014027099 |
| 1028.239981 | 640.428443 | 1.44536E-05 | 0.014861747 |
| 1028.279981 | 599.367113 | 1.35269E-05 | 0.013909421 |
| 1028.319981 | 525.325074 | 1.18559E-05 | 0.012191613 |
| 1028.359981 | 438.213869 | 9.88988E-06 | 0.010170353 |
| 1028.399981 | 396.526517 | 8.94905E-06 | 0.009203204 |
| 1028.439981 | 353.689856 | 7.98229E-06 | 0.008209304 |
| 1028.479981 | 300.72697  | 6.78699E-06 | 0.006980282 |
| 1028.519981 | 272.656573 | 6.15348E-06 | 0.006328976 |
| 1028.559981 | 276.016447 | 6.22931E-06 | 0.006407216 |
| 1028.599981 | 297.432646 | 6.71264E-06 | 0.006904622 |
| 1028.639981 | 318.036372 | 7.17764E-06 | 0.007383205 |
| 1028.679981 | 314.824621 | 7.10515E-06 | 0.007308929 |
| 1028.719981 | 325.519324 | 7.34652E-06 | 0.00755751  |
| 1028.759981 | 336.13864  | 7.58618E-06 | 0.007804359 |
| 1028.799981 | 348.929478 | 7.87485E-06 | 0.008101648 |
| 1028.839981 | 355.665648 | 8.02688E-06 | 0.008258373 |
| 1028.879981 | 347.188756 | 7.83557E-06 | 0.008061858 |
| 1028.919981 | 333.588682 | 7.52863E-06 | 0.00774636  |
| 1028.959981 | 332.907315 | 7.51325E-06 | 0.007730838 |
| 1028.999981 | 373.120544 | 8.42081E-06 | 0.008665014 |
| 1029.039981 | 444.378439 | 1.0029E-05  | 0.010320244 |
| 1029.079981 | 512.858594 | 1.15745E-05 | 0.01191109  |
| 1029.119981 | 633.013997 | 1.42862E-05 | 0.014702259 |
| 1029.159981 | 779.516663 | 1.75926E-05 | 0.018105605 |
| 1029.199981 | 877.618761 | 1.98066E-05 | 0.020384986 |
| 1029.239981 | 936.588024 | 2.11375E-05 | 0.021755547 |
| 1029.279981 | 952.59998  | 2.14989E-05 | 0.022128341 |
| 1029.319981 | 850.77768  | 1.92009E-05 | 0.019763836 |
| 1029.359981 | 678.659873 | 1.53164E-05 | 0.015766097 |
| 1029.399981 | 553.12623  | 1.24833E-05 | 0.012850297 |
| 1029.439981 | 451.88273  | 1.01984E-05 | 0.010498603 |
| 1029.479981 | 384.495949 | 8.67754E-06 | 0.008933352 |
| 1029.519981 | 338.348654 | 7.63606E-06 | 0.007861474 |

|             |            |             |             |
|-------------|------------|-------------|-------------|
| 1029.559981 | 298.158876 | 6.72903E-06 | 0.006927941 |
| 1029.599981 | 287.773159 | 6.49464E-06 | 0.006686881 |
| 1029.639981 | 304.492215 | 6.87197E-06 | 0.00707565  |
| 1029.679981 | 308.166931 | 6.9549E-06  | 0.00716132  |
| 1029.719981 | 297.34168  | 6.71059E-06 | 0.006910026 |
| 1029.759981 | 290.064368 | 6.54635E-06 | 0.006741168 |
| 1029.799981 | 278.872674 | 6.29377E-06 | 0.006481322 |
| 1029.839981 | 268.062546 | 6.0498E-06  | 0.006230324 |
| 1029.879981 | 269.853846 | 6.09023E-06 | 0.006272201 |
| 1029.919981 | 300.493191 | 6.78171E-06 | 0.006984621 |
| 1029.959981 | 297.253931 | 6.70861E-06 | 0.006909597 |
| 1029.999981 | 306.026669 | 6.9066E-06  | 0.007113793 |
| 1030.039981 | 368.693296 | 8.32089E-06 | 0.008570854 |
| 1030.079981 | 452.450987 | 1.02112E-05 | 0.010518341 |
| 1030.119981 | 523.929985 | 1.18244E-05 | 0.01218052  |
| 1030.159981 | 607.123806 | 1.37019E-05 | 0.014115189 |
| 1030.199981 | 665.511217 | 1.50197E-05 | 0.015473255 |
| 1030.239981 | 723.442763 | 1.63271E-05 | 0.016820827 |
| 1030.279981 | 715.387995 | 1.61453E-05 | 0.01663419  |
| 1030.319981 | 621.174411 | 1.4019E-05  | 0.014444098 |
| 1030.359981 | 534.002917 | 1.20517E-05 | 0.012417591 |
| 1030.399981 | 467.598815 | 1.05531E-05 | 0.010873867 |
| 1030.439981 | 380.640623 | 8.59053E-06 | 0.008852024 |
| 1030.479981 | 301.607789 | 6.80687E-06 | 0.007014341 |
| 1030.519981 | 282.263301 | 6.37029E-06 | 0.006564711 |
| 1030.559981 | 310.05868  | 6.99759E-06 | 0.007211439 |
| 1030.599981 | 329.867138 | 7.44464E-06 | 0.007672448 |
| 1030.639981 | 342.646733 | 7.73306E-06 | 0.00797     |
| 1030.679981 | 318.935965 | 7.19794E-06 | 0.007418773 |
| 1030.719981 | 286.208658 | 6.45933E-06 | 0.006657761 |
| 1030.759981 | 271.846375 | 6.13519E-06 | 0.006323912 |
| 1030.799981 | 275.700555 | 6.22218E-06 | 0.00641382  |
| 1030.839981 | 328.611339 | 7.4163E-06  | 0.007645019 |
| 1030.879981 | 361.346166 | 8.15508E-06 | 0.008406908 |
| 1030.919981 | 365.551221 | 8.24998E-06 | 0.008505071 |
| 1030.959981 | 379.565059 | 8.56625E-06 | 0.008831466 |
| 1030.999981 | 421.93872  | 9.52257E-06 | 0.009817769 |
| 1031.039981 | 466.156867 | 1.05205E-05 | 0.010847068 |
| 1031.079981 | 540.534204 | 1.21991E-05 | 0.012578252 |
| 1031.119981 | 626.975212 | 1.415E-05   | 0.014590304 |
| 1031.159981 | 686.41661  | 1.54915E-05 | 0.015974181 |
| 1031.199981 | 751.120114 | 1.69517E-05 | 0.017480629 |
| 1031.239981 | 758.584436 | 1.71202E-05 | 0.017655029 |
| 1031.279981 | 709.008041 | 1.60013E-05 | 0.016501845 |
| 1031.319981 | 658.184984 | 1.48543E-05 | 0.015319555 |
| 1031.359981 | 595.770148 | 1.34457E-05 | 0.013867359 |



|             |            |             |             |
|-------------|------------|-------------|-------------|
| 1031.399981 | 499.50207  | 1.12731E-05 | 0.01162704  |
| 1031.439981 | 399.095515 | 9.00703E-06 | 0.009290211 |
| 1031.479981 | 322.462654 | 7.27753E-06 | 0.00750663  |
| 1031.519981 | 298.878715 | 6.74528E-06 | 0.006957887 |
| 1031.559981 | 310.200117 | 7.00078E-06 | 0.007221729 |
| 1031.599981 | 347.588875 | 7.8446E-06  | 0.008092486 |
| 1031.639981 | 348.227568 | 7.85901E-06 | 0.00810767  |
| 1031.679981 | 318.55327  | 7.1893E-06  | 0.007417061 |
| 1031.719981 | 305.309477 | 6.89041E-06 | 0.007108973 |
| 1031.759981 | 276.884066 | 6.24889E-06 | 0.006447352 |
| 1031.799981 | 259.203499 | 5.84986E-06 | 0.006035887 |
| 1031.839981 | 275.131436 | 6.20933E-06 | 0.006407038 |
| 1031.879981 | 308.376489 | 6.95963E-06 | 0.007181501 |
| 1031.919981 | 305.91071  | 6.90398E-06 | 0.007124353 |
| 1031.959981 | 304.2104   | 6.8656E-06  | 0.00708503  |
| 1031.999981 | 326.581591 | 7.37049E-06 | 0.007606347 |
| 1032.039981 | 356.733026 | 8.05097E-06 | 0.00830892  |
| 1032.079981 | 419.16792  | 9.46004E-06 | 0.009763514 |
| 1032.119981 | 474.885208 | 1.07175E-05 | 0.011061744 |
| 1032.159981 | 533.441831 | 1.2039E-05  | 0.012426214 |
| 1032.199981 | 582.102756 | 1.31372E-05 | 0.013560268 |
| 1032.239981 | 566.892934 | 1.2794E-05  | 0.013206462 |
| 1032.279981 | 518.820028 | 1.1709E-05  | 0.012087013 |
| 1032.319981 | 485.833983 | 1.09646E-05 | 0.011318972 |
| 1032.359981 | 472.851208 | 1.06716E-05 | 0.011016926 |
| 1032.399981 | 436.553816 | 9.85241E-06 | 0.01017163  |
| 1032.439981 | 360.356383 | 8.13274E-06 | 0.008396568 |
| 1032.479981 | 312.436668 | 7.05126E-06 | 0.007280285 |
| 1032.519981 | 315.953437 | 7.13063E-06 | 0.007362517 |
| 1032.559981 | 324.132112 | 7.31521E-06 | 0.007553393 |
| 1032.599981 | 331.591887 | 7.48357E-06 | 0.007727531 |
| 1032.639981 | 342.28092  | 7.7248E-06  | 0.007976941 |
| 1032.679981 | 339.254696 | 7.65651E-06 | 0.00790672  |
| 1032.719981 | 326.915666 | 7.37803E-06 | 0.00761944  |
| 1032.759981 | 315.978962 | 7.13121E-06 | 0.007364823 |
| 1032.799981 | 297.815084 | 6.72127E-06 | 0.006941729 |
| 1032.839981 | 312.228389 | 7.04656E-06 | 0.007277969 |
| 1032.879981 | 331.353008 | 7.47818E-06 | 0.007724058 |
| 1032.919981 | 359.634123 | 8.11644E-06 | 0.008383634 |
| 1032.959981 | 376.19463  | 8.49019E-06 | 0.008770025 |
| 1032.999981 | 378.532336 | 8.54295E-06 | 0.008824865 |
| 1033.039981 | 408.866079 | 9.22754E-06 | 0.009532416 |
| 1033.079981 | 489.357075 | 1.10441E-05 | 0.011409446 |
| 1033.119981 | 615.670509 | 1.38948E-05 | 0.014355022 |
| 1033.159981 | 728.10814  | 1.64324E-05 | 0.016977284 |
| 1033.199981 | 770.155826 | 1.73813E-05 | 0.017958405 |

|             |            |             |             |
|-------------|------------|-------------|-------------|
| 1033.239981 | 760.152867 | 1.71556E-05 | 0.017725843 |
| 1033.279981 | 703.08568  | 1.58677E-05 | 0.01639574  |
| 1033.319981 | 604.860666 | 1.36509E-05 | 0.014105709 |
| 1033.359981 | 495.274274 | 1.11777E-05 | 0.011550537 |
| 1033.399981 | 408.565242 | 9.22075E-06 | 0.009528721 |
| 1033.439981 | 347.849707 | 7.85048E-06 | 0.008113003 |
| 1033.479981 | 294.214911 | 6.64002E-06 | 0.006862329 |
| 1033.519981 | 272.554082 | 6.15117E-06 | 0.006357353 |
| 1033.559981 | 298.698067 | 6.7412E-06  | 0.006967434 |
| 1033.599981 | 324.825332 | 7.33086E-06 | 0.007577172 |
| 1033.639981 | 338.931938 | 7.64922E-06 | 0.007906541 |
| 1033.679981 | 329.253462 | 7.43079E-06 | 0.007681061 |
| 1033.719981 | 305.59709  | 6.8969E-06  | 0.007129464 |
| 1033.759981 | 278.5081   | 6.28554E-06 | 0.00649774  |
| 1033.799981 | 278.193448 | 6.27844E-06 | 0.00649065  |
| 1033.839981 | 272.497721 | 6.14989E-06 | 0.006358006 |
| 1033.879981 | 274.488014 | 6.19481E-06 | 0.006404692 |
| 1033.919981 | 278.862828 | 6.29355E-06 | 0.006507023 |
| 1033.959981 | 288.728664 | 6.5162E-06  | 0.006737494 |
| 1033.999981 | 313.482668 | 7.07487E-06 | 0.007315413 |
| 1034.039981 | 358.855577 | 8.09887E-06 | 0.008374556 |
| 1034.079981 | 420.141124 | 9.482E-06   | 0.009805146 |
| 1034.119981 | 492.066295 | 1.11053E-05 | 0.011484162 |
| 1034.159981 | 574.740354 | 1.29711E-05 | 0.013414181 |
| 1034.199981 | 624.007485 | 1.4083E-05  | 0.014564617 |
| 1034.239981 | 606.777821 | 1.36941E-05 | 0.014163017 |
| 1034.279981 | 572.076251 | 1.2911E-05  | 0.013353552 |
| 1034.319981 | 510.656985 | 1.15248E-05 | 0.011920348 |
| 1034.359981 | 442.958589 | 9.99696E-06 | 0.010340454 |
| 1034.399981 | 374.843124 | 8.45969E-06 | 0.0087507   |
| 1034.439981 | 300.861411 | 6.79002E-06 | 0.007023871 |
| 1034.479981 | 270.97605  | 6.11555E-06 | 0.006326416 |
| 1034.519981 | 266.174389 | 6.00719E-06 | 0.006214553 |
| 1034.559981 | 284.726891 | 6.42589E-06 | 0.006647968 |
| 1034.599981 | 301.69673  | 6.80887E-06 | 0.007044462 |
| 1034.639981 | 310.623106 | 7.01033E-06 | 0.007253169 |
| 1034.679981 | 305.209395 | 6.88815E-06 | 0.007127032 |
| 1034.719981 | 292.183966 | 6.59419E-06 | 0.006823135 |
| 1034.759981 | 285.020565 | 6.43252E-06 | 0.006656111 |
| 1034.799981 | 291.939955 | 6.58868E-06 | 0.006817964 |
| 1034.839981 | 297.337219 | 6.71049E-06 | 0.00694428  |
| 1034.879981 | 310.111109 | 6.99878E-06 | 0.007242893 |
| 1034.919981 | 318.061366 | 7.1782E-06  | 0.007428865 |
| 1034.959981 | 310.613649 | 7.01012E-06 | 0.007255191 |
| 1034.999981 | 338.632299 | 7.64246E-06 | 0.007909945 |
| 1035.039981 | 400.181807 | 9.03155E-06 | 0.009348011 |

|             |            |             |             |
|-------------|------------|-------------|-------------|
| 1035.079981 | 451.137847 | 1.01816E-05 | 0.010538722 |
| 1035.119981 | 476.923344 | 1.07635E-05 | 0.011141509 |
| 1035.159981 | 518.735676 | 1.17071E-05 | 0.012118765 |
| 1035.199981 | 584.297661 | 1.31868E-05 | 0.013650959 |
| 1035.239981 | 655.290368 | 1.4789E-05  | 0.015310155 |
| 1035.279981 | 665.535024 | 1.50202E-05 | 0.015550111 |
| 1035.319981 | 608.841268 | 1.37407E-05 | 0.014226021 |
| 1035.359981 | 521.798338 | 1.17763E-05 | 0.01219267  |
| 1035.399981 | 423.801664 | 9.56461E-06 | 0.0099032   |
| 1035.439981 | 333.193996 | 7.51972E-06 | 0.007786223 |
| 1035.479981 | 279.49429  | 6.3078E-06  | 0.006531597 |
| 1035.519981 | 245.842426 | 5.54832E-06 | 0.005745397 |
| 1035.559981 | 237.41476  | 5.35812E-06 | 0.005548655 |
| 1035.599981 | 231.335944 | 5.22093E-06 | 0.005406795 |
| 1035.639981 | 235.658153 | 5.31848E-06 | 0.005508027 |
| 1035.679981 | 255.220546 | 5.75997E-06 | 0.005965488 |
| 1035.719981 | 276.673125 | 6.24413E-06 | 0.006467167 |
| 1035.759981 | 268.282976 | 6.05477E-06 | 0.006271292 |
| 1035.799981 | 257.145095 | 5.80341E-06 | 0.006011168 |
| 1035.839981 | 267.90517  | 6.04625E-06 | 0.006262944 |
| 1035.879981 | 295.294148 | 6.66438E-06 | 0.006903495 |
| 1035.919981 | 311.315427 | 7.02596E-06 | 0.007278328 |
| 1035.959981 | 313.974374 | 7.08596E-06 | 0.007340775 |
| 1035.999981 | 323.157995 | 7.29323E-06 | 0.007555782 |
| 1036.039981 | 349.292306 | 7.88304E-06 | 0.008167145 |
| 1036.079981 | 411.209794 | 9.28043E-06 | 0.00961527  |
| 1036.119981 | 486.692089 | 1.0984E-05  | 0.011380703 |
| 1036.159981 | 522.118622 | 1.17835E-05 | 0.012209581 |
| 1036.199981 | 540.756924 | 1.22041E-05 | 0.01264592  |
| 1036.239981 | 540.588414 | 1.22003E-05 | 0.012642467 |
| 1036.279981 | 524.341581 | 1.18337E-05 | 0.012262984 |
| 1036.319981 | 511.125358 | 1.15354E-05 | 0.011954352 |
| 1036.359981 | 450.693199 | 1.01715E-05 | 0.010541354 |
| 1036.399981 | 383.794966 | 8.66172E-06 | 0.008977004 |
| 1036.439981 | 345.755063 | 7.80321E-06 | 0.008087559 |
| 1036.479981 | 295.710521 | 6.67377E-06 | 0.006917234 |
| 1036.519981 | 281.718704 | 6.358E-06   | 0.006590193 |
| 1036.559981 | 272.253748 | 6.14439E-06 | 0.006369027 |
| 1036.599981 | 273.325865 | 6.16858E-06 | 0.006394354 |
| 1036.639981 | 279.065268 | 6.29811E-06 | 0.006528877 |
| 1036.679981 | 294.931159 | 6.65619E-06 | 0.006900334 |
| 1036.719981 | 287.219391 | 6.48214E-06 | 0.006720166 |
| 1036.759981 | 270.674056 | 6.10874E-06 | 0.006333293 |
| 1036.799981 | 276.218023 | 6.23386E-06 | 0.006463262 |
| 1036.839981 | 283.93859  | 6.4081E-06  | 0.006644173 |
| 1036.879981 | 280.91029  | 6.33975E-06 | 0.006573564 |

|             |            |             |             |
|-------------|------------|-------------|-------------|
| 1036.919981 | 292.623857 | 6.60411E-06 | 0.006847937 |
| 1036.959981 | 328.90146  | 7.42285E-06 | 0.007697196 |
| 1036.999981 | 378.958238 | 8.55256E-06 | 0.008869004 |
| 1037.039981 | 414.307082 | 9.35033E-06 | 0.00969667  |
| 1037.079981 | 497.955194 | 1.12382E-05 | 0.011654866 |
| 1037.119981 | 617.654606 | 1.39396E-05 | 0.014457042 |
| 1037.159981 | 671.905577 | 1.5164E-05  | 0.015727466 |
| 1037.199981 | 645.2817   | 1.45631E-05 | 0.015104857 |
| 1037.239981 | 628.567681 | 1.41859E-05 | 0.01471418  |
| 1037.279981 | 627.598076 | 1.4164E-05  | 0.014692049 |
| 1037.319981 | 575.970518 | 1.29989E-05 | 0.013483969 |
| 1037.359981 | 502.046901 | 1.13305E-05 | 0.011753806 |
| 1037.399981 | 403.568575 | 9.10798E-06 | 0.009448619 |
| 1037.439981 | 314.107768 | 7.08897E-06 | 0.007354386 |
| 1037.479981 | 295.189036 | 6.66201E-06 | 0.006911697 |
| 1037.519981 | 279.207208 | 6.30132E-06 | 0.006537743 |
| 1037.559981 | 264.550154 | 5.97053E-06 | 0.006194781 |
| 1037.599981 | 248.448966 | 5.60715E-06 | 0.005817976 |
| 1037.639981 | 242.67291  | 5.47679E-06 | 0.005682936 |
| 1037.679981 | 246.563099 | 5.56459E-06 | 0.005774259 |
| 1037.719981 | 246.384943 | 5.56056E-06 | 0.005770309 |
| 1037.759981 | 252.768443 | 5.70463E-06 | 0.005920038 |
| 1037.799981 | 267.355929 | 6.03385E-06 | 0.00626193  |
| 1037.839981 | 269.510045 | 6.08247E-06 | 0.006312627 |
| 1037.879981 | 272.172046 | 6.14254E-06 | 0.006375223 |
| 1037.919981 | 254.779341 | 5.75001E-06 | 0.005968055 |
| 1037.959981 | 240.135325 | 5.41952E-06 | 0.005625245 |
| 1037.999981 | 257.833469 | 5.81894E-06 | 0.006040062 |
| 1038.039981 | 285.490607 | 6.44313E-06 | 0.006688222 |
| 1038.079981 | 330.58752  | 7.4609E-06  | 0.007745011 |
| 1038.119981 | 401.641063 | 9.06448E-06 | 0.009410017 |
| 1038.159981 | 465.350012 | 1.05023E-05 | 0.010903069 |
| 1038.199981 | 532.306393 | 1.20134E-05 | 0.012472326 |
| 1038.239981 | 543.671953 | 1.22699E-05 | 0.01273912  |
| 1038.279981 | 522.94284  | 1.18021E-05 | 0.012253875 |
| 1038.319981 | 481.690533 | 1.08711E-05 | 0.011287664 |
| 1038.359981 | 420.067761 | 9.48034E-06 | 0.00984401  |
| 1038.399981 | 350.703203 | 7.91488E-06 | 0.008218814 |
| 1038.439981 | 316.570835 | 7.14456E-06 | 0.0074192   |
| 1038.479981 | 312.513738 | 7.053E-06   | 0.007324399 |
| 1038.519981 | 295.017778 | 6.65814E-06 | 0.006914612 |
| 1038.559981 | 258.320858 | 5.82994E-06 | 0.006054744 |
| 1038.599981 | 242.530221 | 5.47357E-06 | 0.005684849 |
| 1038.639981 | 255.690935 | 5.77059E-06 | 0.005993564 |
| 1038.679981 | 274.233049 | 6.18906E-06 | 0.006428451 |
| 1038.719981 | 297.119605 | 6.70558E-06 | 0.006965215 |

|             |            |             |             |
|-------------|------------|-------------|-------------|
| 1038.759981 | 308.89595  | 6.97135E-06 | 0.007241561 |
| 1038.799981 | 287.608363 | 6.49092E-06 | 0.006742768 |
| 1038.839981 | 296.169033 | 6.68412E-06 | 0.006943734 |
| 1038.879981 | 322.239397 | 7.27249E-06 | 0.007555249 |
| 1038.919981 | 314.742275 | 7.10329E-06 | 0.007379755 |
| 1038.959981 | 330.773792 | 7.4651E-06  | 0.007755944 |
| 1038.999981 | 346.264808 | 7.81471E-06 | 0.008119488 |
| 1039.039981 | 395.752791 | 8.93159E-06 | 0.009280278 |
| 1039.079981 | 494.415396 | 1.11583E-05 | 0.011594332 |
| 1039.119981 | 586.26871  | 1.32313E-05 | 0.013748875 |
| 1039.159981 | 654.914565 | 1.47805E-05 | 0.015359314 |
| 1039.199981 | 737.533031 | 1.66451E-05 | 0.017297581 |
| 1039.239981 | 745.682164 | 1.6829E-05  | 0.017489378 |
| 1039.279981 | 688.851715 | 1.55464E-05 | 0.016157087 |
| 1039.319981 | 586.07103  | 1.32268E-05 | 0.013746885 |
| 1039.359981 | 531.338826 | 1.19916E-05 | 0.012463565 |
| 1039.399981 | 450.894863 | 1.01761E-05 | 0.010577006 |
| 1039.439981 | 361.188236 | 8.15152E-06 | 0.008473011 |
| 1039.479981 | 303.632557 | 6.85256E-06 | 0.007123103 |
| 1039.519981 | 283.130331 | 6.38986E-06 | 0.006642384 |
| 1039.559981 | 269.435556 | 6.08079E-06 | 0.006321341 |
| 1039.599981 | 245.187749 | 5.53355E-06 | 0.005752674 |
| 1039.639981 | 258.678054 | 5.838E-06   | 0.006069422 |
| 1039.679981 | 279.574904 | 6.30962E-06 | 0.006559982 |
| 1039.719981 | 299.986066 | 6.77027E-06 | 0.007039183 |
| 1039.759981 | 289.266678 | 6.52835E-06 | 0.006787913 |
| 1039.799981 | 241.330928 | 5.4465E-06  | 0.005663274 |
| 1039.839981 | 224.108396 | 5.05781E-06 | 0.005259318 |
| 1039.879981 | 249.73583  | 5.63619E-06 | 0.005860961 |
| 1039.919981 | 282.352105 | 6.37229E-06 | 0.006626676 |
| 1039.959981 | 303.187187 | 6.84251E-06 | 0.007115939 |
| 1039.999981 | 309.931004 | 6.99471E-06 | 0.007274499 |
| 1040.039981 | 344.664723 | 7.7786E-06  | 0.008090058 |
| 1040.079981 | 401.592583 | 9.06339E-06 | 0.009426646 |
| 1040.119981 | 440.914434 | 9.95082E-06 | 0.010350052 |
| 1040.159981 | 468.213019 | 1.05669E-05 | 0.010991283 |
| 1040.199981 | 514.601544 | 1.16138E-05 | 0.012080716 |
| 1040.239981 | 558.859947 | 1.26127E-05 | 0.013120225 |
| 1040.279981 | 547.666691 | 1.23601E-05 | 0.012857938 |
| 1040.319981 | 522.378365 | 1.17894E-05 | 0.012264699 |
| 1040.359981 | 455.844621 | 1.02878E-05 | 0.010702993 |
| 1040.399981 | 385.392676 | 8.69778E-06 | 0.009049166 |
| 1040.439981 | 325.167666 | 7.33858E-06 | 0.007635353 |
| 1040.479981 | 295.718426 | 6.67395E-06 | 0.006944114 |
| 1040.519981 | 297.563736 | 6.7156E-06  | 0.006987715 |
| 1040.559981 | 293.761887 | 6.6298E-06  | 0.006898701 |

|             |            |             |             |
|-------------|------------|-------------|-------------|
| 1040.599981 | 278.43822  | 6.28396E-06 | 0.006539092 |
| 1040.639981 | 247.328081 | 5.58185E-06 | 0.005808697 |
| 1040.679981 | 240.231076 | 5.42168E-06 | 0.005642235 |
| 1040.719981 | 269.565494 | 6.08372E-06 | 0.006331447 |
| 1040.759981 | 287.957243 | 6.49879E-06 | 0.006763685 |
| 1040.799981 | 283.426821 | 6.39655E-06 | 0.006657528 |
| 1040.839981 | 276.765051 | 6.2462E-06  | 0.006501296 |
| 1040.879981 | 307.637249 | 6.94294E-06 | 0.007226772 |
| 1040.919981 | 338.844766 | 7.64725E-06 | 0.00796018  |
| 1040.959981 | 366.470578 | 8.27073E-06 | 0.008609499 |
| 1040.999981 | 381.502376 | 8.60998E-06 | 0.008962986 |
| 1041.039981 | 411.931821 | 9.29673E-06 | 0.009678265 |
| 1041.079981 | 476.645339 | 1.07572E-05 | 0.011199128 |
| 1041.119981 | 558.516935 | 1.26049E-05 | 0.013123265 |
| 1041.159981 | 630.201575 | 1.42228E-05 | 0.014808181 |
| 1041.199981 | 648.972202 | 1.46464E-05 | 0.01524983  |
| 1041.239981 | 626.056013 | 1.41292E-05 | 0.014711901 |
| 1041.279981 | 620.184169 | 1.39967E-05 | 0.014574476 |
| 1041.319981 | 595.055656 | 1.34296E-05 | 0.013984487 |
| 1041.359981 | 500.120203 | 1.1287E-05  | 0.011753847 |
| 1041.399981 | 421.364987 | 9.50962E-06 | 0.009903319 |
| 1041.439981 | 391.482705 | 8.83522E-06 | 0.009201351 |
| 1041.479981 | 347.477906 | 7.84209E-06 | 0.008167382 |
| 1041.519981 | 320.830111 | 7.24069E-06 | 0.007541322 |
| 1041.559981 | 293.516184 | 6.62425E-06 | 0.006899555 |
| 1041.599981 | 265.805252 | 5.99885E-06 | 0.006248407 |
| 1041.639981 | 279.625346 | 6.31075E-06 | 0.006573534 |
| 1041.679981 | 299.947938 | 6.76941E-06 | 0.007051556 |
| 1041.719981 | 319.13145  | 7.20235E-06 | 0.007502834 |
| 1041.759981 | 306.628983 | 6.92019E-06 | 0.007209176 |
| 1041.799981 | 272.131967 | 6.14164E-06 | 0.00639836  |
| 1041.839981 | 271.422236 | 6.12562E-06 | 0.006381918 |
| 1041.879981 | 273.344376 | 6.169E-06   | 0.00642736  |
| 1041.919981 | 277.266309 | 6.25751E-06 | 0.006519829 |
| 1041.959981 | 285.618122 | 6.446E-06   | 0.006716477 |
| 1041.999981 | 285.851486 | 6.45127E-06 | 0.006722223 |
| 1042.039981 | 314.16518  | 7.09027E-06 | 0.007388345 |
| 1042.079981 | 388.921335 | 8.77741E-06 | 0.009146766 |
| 1042.119981 | 466.293595 | 1.05236E-05 | 0.010966851 |
| 1042.159981 | 521.296979 | 1.17649E-05 | 0.012260957 |
| 1042.199981 | 566.458046 | 1.27842E-05 | 0.013323661 |
| 1042.239981 | 614.941589 | 1.38784E-05 | 0.014464597 |
| 1042.279981 | 583.268215 | 1.31636E-05 | 0.013720106 |
| 1042.319981 | 564.065805 | 1.27302E-05 | 0.01326892  |
| 1042.359981 | 515.547616 | 1.16352E-05 | 0.012128058 |
| 1042.399981 | 438.341644 | 9.89276E-06 | 0.010312213 |

|             |            |             |             |
|-------------|------------|-------------|-------------|
| 1042.439981 | 350.746629 | 7.91586E-06 | 0.008251812 |
| 1042.479981 | 286.5034   | 6.46598E-06 | 0.006740657 |
| 1042.519981 | 263.697721 | 5.95129E-06 | 0.006204339 |
| 1042.559981 | 294.284549 | 6.64159E-06 | 0.006924258 |
| 1042.599981 | 320.336738 | 7.22955E-06 | 0.007537533 |
| 1042.639981 | 325.728769 | 7.35124E-06 | 0.007664702 |
| 1042.679981 | 325.78228  | 7.35245E-06 | 0.007666255 |
| 1042.719981 | 323.640038 | 7.3041E-06  | 0.007616136 |
| 1042.759981 | 327.117354 | 7.38258E-06 | 0.007698262 |
| 1042.799981 | 311.077405 | 7.02058E-06 | 0.007321065 |
| 1042.839981 | 277.471008 | 6.26213E-06 | 0.006530404 |
| 1042.879981 | 261.380731 | 5.899E-06   | 0.006151948 |
| 1042.919981 | 277.496858 | 6.26272E-06 | 0.006531513 |
| 1042.959981 | 295.180979 | 6.66182E-06 | 0.006948015 |
| 1042.999981 | 339.380492 | 7.65934E-06 | 0.007988697 |
| 1043.039981 | 400.994043 | 9.04988E-06 | 0.009439384 |
| 1043.079981 | 468.549182 | 1.05745E-05 | 0.011030052 |
| 1043.119981 | 528.578002 | 1.19293E-05 | 0.012443659 |
| 1043.159981 | 614.377756 | 1.38657E-05 | 0.014464091 |
| 1043.199981 | 699.375641 | 1.57839E-05 | 0.0164658   |
| 1043.239981 | 740.149097 | 1.67041E-05 | 0.017426421 |
| 1043.279981 | 715.778686 | 1.61541E-05 | 0.016853278 |
| 1043.319981 | 636.645337 | 1.43682E-05 | 0.014990629 |
| 1043.359981 | 522.32898  | 1.17882E-05 | 0.012299375 |
| 1043.399981 | 405.19568  | 9.1447E-06  | 0.009541582 |
| 1043.439981 | 326.988727 | 7.37968E-06 | 0.007700253 |
| 1043.479981 | 295.444668 | 6.66777E-06 | 0.006957689 |
| 1043.519981 | 259.510772 | 5.8568E-06  | 0.006111684 |
| 1043.559981 | 230.717077 | 5.20696E-06 | 0.005433778 |
| 1043.599981 | 240.288803 | 5.42298E-06 | 0.005659426 |
| 1043.639981 | 266.995788 | 6.02572E-06 | 0.006288685 |
| 1043.679981 | 296.010034 | 6.68053E-06 | 0.00697234  |
| 1043.719981 | 311.201938 | 7.02339E-06 | 0.007330457 |
| 1043.759981 | 289.413872 | 6.53167E-06 | 0.006817494 |
| 1043.799981 | 259.925861 | 5.86616E-06 | 0.006123103 |
| 1043.839981 | 273.08918  | 6.16324E-06 | 0.006433439 |
| 1043.879981 | 310.516096 | 7.00792E-06 | 0.007315423 |
| 1043.919981 | 329.848634 | 7.44422E-06 | 0.007771174 |
| 1043.959981 | 342.94002  | 7.73968E-06 | 0.008079915 |
| 1043.999981 | 355.60942  | 8.02561E-06 | 0.008378736 |
| 1044.039981 | 335.72586  | 7.57687E-06 | 0.00791055  |
| 1044.079981 | 338.902774 | 7.64856E-06 | 0.007985712 |
| 1044.119981 | 403.941374 | 9.11639E-06 | 0.009518609 |
| 1044.159981 | 474.968283 | 1.07194E-05 | 0.01119274  |
| 1044.199981 | 508.973787 | 1.14868E-05 | 0.011994547 |
| 1044.239981 | 537.855234 | 1.21386E-05 | 0.012675657 |

|             |            |             |             |
|-------------|------------|-------------|-------------|
| 1044.279981 | 559.363085 | 1.2624E-05  | 0.013183038 |
| 1044.319981 | 515.76741  | 1.16402E-05 | 0.012156043 |
| 1044.359981 | 419.084941 | 9.45816E-06 | 0.009877727 |
| 1044.399981 | 329.162742 | 7.42874E-06 | 0.007758581 |
| 1044.439981 | 294.930486 | 6.65617E-06 | 0.00695197  |
| 1044.479981 | 302.611509 | 6.82952E-06 | 0.007133297 |
| 1044.519981 | 335.456416 | 7.57078E-06 | 0.007907835 |
| 1044.559981 | 337.839655 | 7.62457E-06 | 0.007964321 |
| 1044.599981 | 294.755025 | 6.65221E-06 | 0.006948899 |
| 1044.639981 | 302.956836 | 6.83731E-06 | 0.007142531 |
| 1044.679981 | 348.121767 | 7.85662E-06 | 0.008207657 |
| 1044.719981 | 332.693676 | 7.50843E-06 | 0.00784421  |
| 1044.759981 | 293.543354 | 6.62486E-06 | 0.006921393 |
| 1044.799981 | 278.549185 | 6.28647E-06 | 0.006568101 |
| 1044.839981 | 283.737144 | 6.40355E-06 | 0.006690687 |
| 1044.879981 | 268.48241  | 6.05927E-06 | 0.006331214 |
| 1044.919981 | 277.166847 | 6.25527E-06 | 0.006536256 |
| 1044.959981 | 322.848929 | 7.28625E-06 | 0.00761384  |
| 1044.999981 | 360.828546 | 8.1434E-06  | 0.00850985  |
| 1045.039981 | 393.758914 | 8.88659E-06 | 0.009286842 |
| 1045.079981 | 447.149661 | 1.00915E-05 | 0.010546472 |
| 1045.119981 | 532.246387 | 1.20121E-05 | 0.012554043 |
| 1045.159981 | 587.027521 | 1.32484E-05 | 0.013846691 |
| 1045.199981 | 637.36684  | 1.43845E-05 | 0.01503466  |
| 1045.239981 | 650.800944 | 1.46877E-05 | 0.015352141 |
| 1045.279981 | 576.939679 | 1.30207E-05 | 0.013610303 |
| 1045.319981 | 496.457667 | 1.12044E-05 | 0.011712139 |
| 1045.359981 | 431.02862  | 9.72772E-06 | 0.010168965 |
| 1045.399981 | 365.170201 | 8.24138E-06 | 0.008615541 |
| 1045.439981 | 309.217848 | 6.97862E-06 | 0.007295724 |
| 1045.479981 | 279.740538 | 6.31335E-06 | 0.006600486 |
| 1045.519981 | 273.484292 | 6.17216E-06 | 0.006453116 |
| 1045.559981 | 274.707267 | 6.19976E-06 | 0.006482221 |
| 1045.599981 | 285.348074 | 6.43991E-06 | 0.006733568 |
| 1045.639981 | 297.848531 | 6.72203E-06 | 0.00702882  |
| 1045.679981 | 303.644127 | 6.85283E-06 | 0.007165862 |
| 1045.719981 | 303.380138 | 6.84687E-06 | 0.007159906 |
| 1045.759981 | 292.458258 | 6.60038E-06 | 0.006902409 |
| 1045.799981 | 291.941877 | 6.58872E-06 | 0.006890485 |
| 1045.839981 | 284.350722 | 6.4174E-06  | 0.006711573 |
| 1045.879981 | 294.701203 | 6.651E-06   | 0.006956143 |
| 1045.919981 | 321.672354 | 7.2597E-06  | 0.007593062 |
| 1045.959981 | 335.465253 | 7.57098E-06 | 0.007918946 |
| 1045.999981 | 337.224524 | 7.61069E-06 | 0.007960779 |
| 1046.039981 | 343.476057 | 7.75178E-06 | 0.008108668 |
| 1046.079981 | 377.109322 | 8.51083E-06 | 0.008903011 |



|             |            |             |             |
|-------------|------------|-------------|-------------|
| 1046.119981 | 441.344533 | 9.96053E-06 | 0.010419911 |
| 1046.159981 | 511.033587 | 1.15333E-05 | 0.012065694 |
| 1046.199981 | 571.385057 | 1.28954E-05 | 0.01349113  |
| 1046.239981 | 598.994155 | 1.35185E-05 | 0.014143557 |
| 1046.279981 | 569.130663 | 1.28445E-05 | 0.013438929 |
| 1046.319981 | 526.270753 | 1.18772E-05 | 0.012427349 |
| 1046.359981 | 508.932703 | 1.14859E-05 | 0.012018388 |
| 1046.399981 | 447.750315 | 1.01051E-05 | 0.010573977 |
| 1046.439981 | 348.015876 | 7.85423E-06 | 0.008218984 |
| 1046.479981 | 284.426987 | 6.41912E-06 | 0.006717482 |
| 1046.519981 | 263.050698 | 5.93669E-06 | 0.006212862 |
| 1046.559981 | 270.055841 | 6.09478E-06 | 0.006378557 |
| 1046.599981 | 292.76884  | 6.60738E-06 | 0.006915289 |
| 1046.639981 | 298.109683 | 6.72792E-06 | 0.00704171  |
| 1046.679981 | 288.958902 | 6.5214E-06  | 0.006825819 |
| 1046.719981 | 329.443086 | 7.43507E-06 | 0.007782438 |
| 1046.759981 | 384.78959  | 8.68417E-06 | 0.009090236 |
| 1046.799981 | 369.787024 | 8.34558E-06 | 0.008736151 |
| 1046.839981 | 346.449022 | 7.81887E-06 | 0.008185108 |
| 1046.879981 | 324.400162 | 7.32126E-06 | 0.00766448  |
| 1046.919981 | 332.295567 | 7.49945E-06 | 0.007851322 |
| 1046.959981 | 391.390044 | 8.83313E-06 | 0.009247932 |
| 1046.999981 | 461.424897 | 1.04137E-05 | 0.010903162 |
| 1047.039981 | 516.652564 | 1.16601E-05 | 0.012208621 |
| 1047.079981 | 581.489626 | 1.31234E-05 | 0.013741261 |
| 1047.119981 | 636.845828 | 1.43727E-05 | 0.015049966 |
| 1047.159981 | 671.009777 | 1.51438E-05 | 0.015857935 |
| 1047.199981 | 658.951306 | 1.48716E-05 | 0.015573553 |
| 1047.239981 | 647.091154 | 1.46039E-05 | 0.015293836 |
| 1047.279981 | 637.669121 | 1.43913E-05 | 0.015071724 |
| 1047.319981 | 594.309866 | 1.34127E-05 | 0.014047437 |
| 1047.359981 | 544.331585 | 1.22848E-05 | 0.012866614 |
| 1047.399981 | 469.699112 | 1.06005E-05 | 0.011102916 |
| 1047.439981 | 380.408608 | 8.58529E-06 | 0.008992579 |
| 1047.479981 | 328.103959 | 7.40485E-06 | 0.007756431 |
| 1047.519981 | 295.087046 | 6.6597E-06  | 0.006976173 |
| 1047.559981 | 283.815466 | 6.40532E-06 | 0.006709957 |
| 1047.599981 | 301.286296 | 6.79961E-06 | 0.007123273 |
| 1047.639981 | 312.544987 | 7.05371E-06 | 0.007389743 |
| 1047.679981 | 296.937289 | 6.70146E-06 | 0.007020987 |
| 1047.719981 | 297.536149 | 6.71498E-06 | 0.007035415 |
| 1047.759981 | 304.405001 | 6.87E-06    | 0.007198108 |
| 1047.799981 | 282.8078   | 6.38258E-06 | 0.006687665 |
| 1047.839981 | 269.743184 | 6.08773E-06 | 0.006378965 |
| 1047.879981 | 269.607934 | 6.08468E-06 | 0.00637601  |
| 1047.919981 | 259.064512 | 5.84673E-06 | 0.0061269   |

|             |            |             |             |
|-------------|------------|-------------|-------------|
| 1047.959981 | 240.029988 | 5.41714E-06 | 0.005676949 |
| 1047.999981 | 286.668971 | 6.46972E-06 | 0.006780266 |
| 1048.039981 | 354.902446 | 8.00965E-06 | 0.008394437 |
| 1048.079981 | 428.892378 | 9.6795E-06  | 0.010144894 |
| 1048.119981 | 491.334922 | 1.10887E-05 | 0.011622335 |
| 1048.159981 | 522.903992 | 1.18012E-05 | 0.012369561 |
| 1048.199981 | 555.412385 | 1.25349E-05 | 0.013139065 |
| 1048.239981 | 589.312802 | 1.33E-05    | 0.013941559 |
| 1048.279981 | 567.280178 | 1.28027E-05 | 0.013420839 |
| 1048.319981 | 488.163285 | 1.10172E-05 | 0.011549515 |
| 1048.359981 | 424.106083 | 9.57148E-06 | 0.01003436  |
| 1048.399981 | 369.636327 | 8.34218E-06 | 0.008745938 |
| 1048.439981 | 313.131272 | 7.06694E-06 | 0.007409259 |
| 1048.479981 | 280.804743 | 6.33737E-06 | 0.006644608 |
| 1048.519981 | 266.363921 | 6.01146E-06 | 0.006303139 |
| 1048.559981 | 272.30512  | 6.14555E-06 | 0.006443975 |
| 1048.599981 | 286.480039 | 6.46546E-06 | 0.006779676 |
| 1048.639981 | 317.425187 | 7.16384E-06 | 0.007512294 |
| 1048.679981 | 334.049084 | 7.53902E-06 | 0.007906022 |
| 1048.719981 | 332.925343 | 7.51366E-06 | 0.007879727 |
| 1048.759981 | 332.362236 | 7.50095E-06 | 0.007866699 |
| 1048.799981 | 317.381877 | 7.16287E-06 | 0.007512415 |
| 1048.839981 | 298.017354 | 6.72584E-06 | 0.007054326 |
| 1048.879981 | 299.652622 | 6.76274E-06 | 0.007093305 |
| 1048.919981 | 308.560635 | 6.96378E-06 | 0.007304452 |
| 1048.959981 | 314.442672 | 7.09653E-06 | 0.007443979 |
| 1048.999981 | 343.73332  | 7.75758E-06 | 0.008137704 |
| 1049.039981 | 396.164368 | 8.94088E-06 | 0.009379338 |
| 1049.079981 | 446.114916 | 1.00682E-05 | 0.010562339 |
| 1049.119981 | 489.212565 | 1.10408E-05 | 0.011583172 |
| 1049.159981 | 564.624121 | 1.27428E-05 | 0.013369215 |
| 1049.199981 | 637.324211 | 1.43835E-05 | 0.015091189 |
| 1049.239981 | 674.705098 | 1.52272E-05 | 0.015976939 |
| 1049.279981 | 663.263587 | 1.49689E-05 | 0.015706604 |
| 1049.319981 | 616.893316 | 1.39224E-05 | 0.014609077 |
| 1049.359981 | 539.467531 | 1.2175E-05  | 0.01277599  |
| 1049.399981 | 447.975078 | 1.01102E-05 | 0.010609616 |
| 1049.439981 | 364.457693 | 8.2253E-06  | 0.008631961 |
| 1049.479981 | 308.425146 | 6.96073E-06 | 0.007305143 |
| 1049.519981 | 265.853004 | 5.99993E-06 | 0.006297049 |
| 1049.559981 | 250.608172 | 5.65588E-06 | 0.005936183 |
| 1049.599981 | 260.598561 | 5.88135E-06 | 0.006173061 |
| 1049.639981 | 281.512801 | 6.35335E-06 | 0.006668732 |
| 1049.679981 | 298.999012 | 6.74799E-06 | 0.007083231 |
| 1049.719981 | 291.417213 | 6.57688E-06 | 0.006903883 |
| 1049.759981 | 247.011543 | 5.57471E-06 | 0.005852104 |

|             |            |             |             |
|-------------|------------|-------------|-------------|
| 1049.799981 | 232.570383 | 5.24879E-06 | 0.005510179 |
| 1049.839981 | 252.434535 | 5.6971E-06  | 0.005981039 |
| 1049.879981 | 265.597231 | 5.99416E-06 | 0.006293148 |
| 1049.919981 | 273.258121 | 6.16706E-06 | 0.006474914 |
| 1049.959981 | 293.276527 | 6.61884E-06 | 0.00694952  |
| 1049.999981 | 319.062303 | 7.20079E-06 | 0.007560831 |
| 1050.039981 | 355.077875 | 8.01361E-06 | 0.008414614 |
| 1050.079981 | 383.868285 | 8.66337E-06 | 0.009097234 |
| 1050.119981 | 399.216582 | 9.00976E-06 | 0.009461331 |
| 1050.159981 | 449.89105  | 1.01534E-05 | 0.010662709 |
| 1050.199981 | 521.860977 | 1.17777E-05 | 0.012368914 |
| 1050.239981 | 532.887983 | 1.20265E-05 | 0.012630753 |
| 1050.279981 | 498.034669 | 1.12399E-05 | 0.011805093 |
| 1050.319981 | 457.85064  | 1.03331E-05 | 0.01085301  |
| 1050.359981 | 419.887738 | 9.47628E-06 | 0.009953507 |
| 1050.399981 | 368.296419 | 8.31194E-06 | 0.008730859 |
| 1050.439981 | 334.406217 | 7.54708E-06 | 0.007927757 |
| 1050.479981 | 301.35266  | 6.80111E-06 | 0.00714443  |
| 1050.519981 | 270.746688 | 6.11038E-06 | 0.006419072 |
| 1050.559981 | 258.1449   | 5.82597E-06 | 0.006120532 |
| 1050.599981 | 258.788472 | 5.8405E-06  | 0.006136024 |
| 1050.639981 | 243.44189  | 5.49414E-06 | 0.005772368 |
| 1050.679981 | 252.939079 | 5.70848E-06 | 0.005997788 |
| 1050.719981 | 279.263062 | 6.30258E-06 | 0.006622245 |
| 1050.759981 | 300.876139 | 6.79036E-06 | 0.007135034 |
| 1050.799981 | 295.00422  | 6.65783E-06 | 0.006996052 |
| 1050.839981 | 286.879957 | 6.47448E-06 | 0.006803644 |
| 1050.879981 | 269.296828 | 6.07765E-06 | 0.006386885 |
| 1050.919981 | 259.042714 | 5.84623E-06 | 0.006143923 |
| 1050.959981 | 273.580825 | 6.17434E-06 | 0.006488982 |
| 1050.999981 | 302.74808  | 6.8326E-06  | 0.007181065 |
| 1051.039981 | 369.16627  | 8.33157E-06 | 0.008756812 |
| 1051.079981 | 442.049173 | 9.97643E-06 | 0.01048603  |
| 1051.119981 | 508.046853 | 1.14659E-05 | 0.012052047 |
| 1051.159981 | 548.307053 | 1.23745E-05 | 0.013007607 |
| 1051.199981 | 569.944519 | 1.28629E-05 | 0.013521432 |
| 1051.239981 | 568.500468 | 1.28303E-05 | 0.013487686 |
| 1051.279981 | 523.383242 | 1.1812E-05  | 0.012417751 |
| 1051.319981 | 489.881086 | 1.10559E-05 | 0.011623324 |
| 1051.359981 | 451.41851  | 1.01879E-05 | 0.010711137 |
| 1051.399981 | 405.346401 | 9.1481E-06  | 0.009618316 |
| 1051.439981 | 339.33222  | 7.65826E-06 | 0.008052196 |
| 1051.479981 | 285.086458 | 6.434E-06   | 0.006765227 |
| 1051.519981 | 267.666042 | 6.04085E-06 | 0.006352074 |
| 1051.559981 | 265.722049 | 5.99698E-06 | 0.006306181 |
| 1051.599981 | 280.583053 | 6.33237E-06 | 0.006659119 |

|             |            |             |             |
|-------------|------------|-------------|-------------|
| 1051.639981 | 261.769824 | 5.90778E-06 | 0.006212858 |
| 1051.679981 | 237.521069 | 5.36052E-06 | 0.005637551 |
| 1051.719981 | 231.21309  | 5.21816E-06 | 0.00548804  |
| 1051.759981 | 251.958012 | 5.68634E-06 | 0.005980666 |
| 1051.799981 | 273.771974 | 6.17865E-06 | 0.006498706 |
| 1051.839981 | 268.793968 | 6.06631E-06 | 0.006380783 |
| 1051.879981 | 257.531226 | 5.81212E-06 | 0.006113654 |
| 1051.919981 | 255.170169 | 5.75884E-06 | 0.006057834 |
| 1051.959981 | 271.306455 | 6.12301E-06 | 0.00644116  |
| 1051.999981 | 287.674849 | 6.49242E-06 | 0.006830026 |
| 1052.039981 | 290.55408  | 6.5574E-06  | 0.006898648 |
| 1052.079981 | 350.80978  | 7.91729E-06 | 0.00832962  |
| 1052.119981 | 450.647465 | 1.01705E-05 | 0.010700571 |
| 1052.159981 | 523.623448 | 1.18175E-05 | 0.01243385  |
| 1052.199981 | 561.351764 | 1.26689E-05 | 0.013330245 |
| 1052.239981 | 568.79772  | 1.2837E-05  | 0.013507575 |
| 1052.279981 | 558.68229  | 1.26087E-05 | 0.013267863 |
| 1052.319981 | 507.369311 | 1.14506E-05 | 0.012049715 |
| 1052.359981 | 468.750384 | 1.0579E-05  | 0.011132962 |
| 1052.399981 | 408.219236 | 9.21294E-06 | 0.009695697 |
| 1052.439981 | 333.762151 | 7.53255E-06 | 0.007927553 |
| 1052.479981 | 290.810093 | 6.56318E-06 | 0.006907614 |
| 1052.519981 | 270.871842 | 6.1132E-06  | 0.006434265 |
| 1052.559981 | 268.639297 | 6.06281E-06 | 0.006381476 |
| 1052.599981 | 269.503695 | 6.08232E-06 | 0.006402253 |
| 1052.639981 | 252.491437 | 5.69838E-06 | 0.005998343 |
| 1052.679981 | 259.611257 | 5.85906E-06 | 0.00616772  |
| 1052.719981 | 294.369674 | 6.64351E-06 | 0.006993759 |
| 1052.759981 | 345.065974 | 7.78766E-06 | 0.008198535 |
| 1052.799981 | 350.7074   | 7.91498E-06 | 0.008332888 |
| 1052.839981 | 314.637201 | 7.10092E-06 | 0.007476136 |
| 1052.879981 | 309.772401 | 6.99113E-06 | 0.007360823 |
| 1052.919981 | 324.524985 | 7.32408E-06 | 0.007711667 |
| 1052.959981 | 339.033304 | 7.65151E-06 | 0.008056733 |
| 1052.999981 | 360.310787 | 8.13171E-06 | 0.008562693 |
| 1053.039981 | 385.221034 | 8.6939E-06  | 0.009155027 |
| 1053.079981 | 439.299543 | 9.91438E-06 | 0.010440634 |
| 1053.119981 | 519.010248 | 1.17133E-05 | 0.012335551 |
| 1053.159981 | 562.256396 | 1.26893E-05 | 0.013363909 |
| 1053.199981 | 606.759878 | 1.36937E-05 | 0.014422231 |
| 1053.239981 | 641.322809 | 1.44738E-05 | 0.015244345 |
| 1053.279981 | 628.120869 | 1.41758E-05 | 0.0149311   |
| 1053.319981 | 573.822624 | 1.29504E-05 | 0.013640891 |
| 1053.359981 | 513.276365 | 1.15839E-05 | 0.012202051 |
| 1053.399981 | 437.43406  | 9.87228E-06 | 0.010399457 |
| 1053.439981 | 348.345812 | 7.86168E-06 | 0.008281808 |

|             |            |             |             |
|-------------|------------|-------------|-------------|
| 1053.479981 | 293.02637  | 6.6132E-06  | 0.006966871 |
| 1053.519981 | 268.668783 | 6.06348E-06 | 0.006387998 |
| 1053.559981 | 274.191611 | 6.18812E-06 | 0.006519558 |
| 1053.599981 | 281.618209 | 6.35573E-06 | 0.006696398 |
| 1053.639981 | 293.142125 | 6.61581E-06 | 0.006970681 |
| 1053.679981 | 300.385311 | 6.77928E-06 | 0.00714319  |
| 1053.719981 | 296.130321 | 6.68325E-06 | 0.007042273 |
| 1053.759981 | 274.741707 | 6.20054E-06 | 0.006533878 |
| 1053.799981 | 254.688646 | 5.74797E-06 | 0.006057209 |
| 1053.839981 | 253.300368 | 5.71664E-06 | 0.00602442  |
| 1053.879981 | 263.483764 | 5.94646E-06 | 0.006266857 |
| 1053.919981 | 260.771265 | 5.88524E-06 | 0.006202576 |
| 1053.959981 | 259.946587 | 5.86663E-06 | 0.006183196 |
| 1053.999981 | 264.685053 | 5.97357E-06 | 0.006296146 |
| 1054.039981 | 292.489422 | 6.60108E-06 | 0.006957801 |
| 1054.079981 | 357.482338 | 8.06788E-06 | 0.008504189 |
| 1054.119981 | 445.734422 | 1.00596E-05 | 0.010604031 |
| 1054.159981 | 511.093629 | 1.15347E-05 | 0.012159389 |
| 1054.199981 | 531.257925 | 1.19898E-05 | 0.012639596 |
| 1054.239981 | 535.149256 | 1.20776E-05 | 0.012732661 |
| 1054.279981 | 547.17941  | 1.23491E-05 | 0.013019385 |
| 1054.319981 | 529.164967 | 1.19425E-05 | 0.012591233 |
| 1054.359981 | 482.152593 | 1.08815E-05 | 0.011473031 |
| 1054.399981 | 376.029208 | 8.48646E-06 | 0.008948118 |
| 1054.439981 | 283.055426 | 6.38817E-06 | 0.006735938 |
| 1054.479981 | 272.432204 | 6.14842E-06 | 0.006483381 |
| 1054.519981 | 313.612908 | 7.07781E-06 | 0.007463688 |
| 1054.559981 | 342.845637 | 7.73755E-06 | 0.008159709 |
| 1054.599981 | 325.794395 | 7.35273E-06 | 0.007754184 |
| 1054.639981 | 306.273268 | 6.91216E-06 | 0.007289841 |
| 1054.679981 | 289.0553   | 6.52358E-06 | 0.006880284 |
| 1054.719981 | 306.005916 | 6.90613E-06 | 0.00728403  |
| 1054.759981 | 310.695313 | 7.01196E-06 | 0.007395935 |
| 1054.799981 | 293.260792 | 6.61849E-06 | 0.006981181 |
| 1054.839981 | 288.259548 | 6.50562E-06 | 0.006862384 |
| 1054.879981 | 297.852843 | 6.72212E-06 | 0.007091034 |
| 1054.919981 | 289.854058 | 6.5416E-06  | 0.006900867 |
| 1054.959981 | 292.3055   | 6.59693E-06 | 0.006959495 |
| 1054.999981 | 312.637758 | 7.0558E-06  | 0.007443868 |
| 1055.039981 | 363.199609 | 8.19691E-06 | 0.008648067 |
| 1055.079981 | 422.472338 | 9.53461E-06 | 0.010059778 |
| 1055.119981 | 493.188202 | 1.11306E-05 | 0.011744088 |
| 1055.159981 | 573.104157 | 1.29342E-05 | 0.013647611 |
| 1055.199981 | 664.640124 | 1.5E-05     | 0.015828002 |
| 1055.239981 | 712.974258 | 1.60908E-05 | 0.016979693 |
| 1055.279981 | 642.578773 | 1.45021E-05 | 0.015303784 |

|             |            |             |             |
|-------------|------------|-------------|-------------|
| 1055.319981 | 566.272259 | 1.278E-05   | 0.013486964 |
| 1055.359981 | 512.671736 | 1.15703E-05 | 0.012210818 |
| 1055.399981 | 429.641905 | 9.69642E-06 | 0.010233601 |
| 1055.439981 | 342.572775 | 7.73139E-06 | 0.008160019 |
| 1055.479981 | 271.22512  | 6.12117E-06 | 0.006460776 |
| 1055.519981 | 227.070931 | 5.12467E-06 | 0.005409196 |
| 1055.559981 | 222.390461 | 5.01904E-06 | 0.005297901 |
| 1055.599981 | 256.980129 | 5.79968E-06 | 0.006122146 |
| 1055.639981 | 306.641371 | 6.92047E-06 | 0.007305523 |
| 1055.679981 | 347.820341 | 7.84982E-06 | 0.008286898 |
| 1055.719981 | 349.438801 | 7.88635E-06 | 0.008325774 |
| 1055.759981 | 300.361019 | 6.77873E-06 | 0.007156712 |
| 1055.799981 | 270.636381 | 6.10789E-06 | 0.006448706 |
| 1055.839981 | 260.46033  | 5.87823E-06 | 0.006206467 |
| 1055.879981 | 255.315127 | 5.76211E-06 | 0.006084093 |
| 1055.919981 | 277.453817 | 6.26175E-06 | 0.006611903 |
| 1055.959981 | 303.04064  | 6.83921E-06 | 0.007221927 |
| 1055.999981 | 305.061622 | 6.88482E-06 | 0.007270365 |
| 1056.039981 | 310.06405  | 6.99771E-06 | 0.007389865 |
| 1056.079981 | 354.099738 | 7.99154E-06 | 0.008439703 |
| 1056.119981 | 432.786757 | 9.76739E-06 | 0.01031554  |
| 1056.159981 | 473.488222 | 1.0686E-05  | 0.011286094 |
| 1056.199981 | 461.672767 | 1.04193E-05 | 0.011004876 |
| 1056.239981 | 457.715357 | 1.033E-05   | 0.010910957 |
| 1056.279981 | 494.656666 | 1.11637E-05 | 0.011792005 |
| 1056.319981 | 497.537507 | 1.12287E-05 | 0.01186113  |
| 1056.359981 | 423.149405 | 9.54989E-06 | 0.010088124 |
| 1056.399981 | 362.442325 | 8.17982E-06 | 0.00864116  |
| 1056.439981 | 334.529393 | 7.54986E-06 | 0.007975977 |
| 1056.479981 | 273.251101 | 6.1669E-06  | 0.006515203 |
| 1056.519981 | 251.723692 | 5.68105E-06 | 0.006002146 |
| 1056.559981 | 257.911286 | 5.8207E-06  | 0.006149917 |
| 1056.599981 | 294.6939   | 6.65083E-06 | 0.007027268 |
| 1056.639981 | 333.961961 | 7.53706E-06 | 0.007963955 |
| 1056.679981 | 339.539367 | 7.66293E-06 | 0.008097265 |
| 1056.719981 | 350.739901 | 7.91571E-06 | 0.00836469  |
| 1056.759981 | 369.198044 | 8.33229E-06 | 0.008805226 |
| 1056.799981 | 349.291792 | 7.88303E-06 | 0.008330785 |
| 1056.839981 | 316.384292 | 7.14035E-06 | 0.00754621  |
| 1056.879981 | 288.043396 | 6.50074E-06 | 0.0068705   |
| 1056.919981 | 305.274496 | 6.88962E-06 | 0.007281777 |
| 1056.959981 | 344.41081  | 7.77287E-06 | 0.008215615 |
| 1056.999981 | 363.674003 | 8.20762E-06 | 0.00867545  |
| 1057.039981 | 403.922029 | 9.11596E-06 | 0.009635932 |
| 1057.079981 | 462.080728 | 1.04285E-05 | 0.011023778 |
| 1057.119981 | 531.064773 | 1.19854E-05 | 0.012669998 |

|             |            |             |             |
|-------------|------------|-------------|-------------|
| 1057.159981 | 579.819027 | 1.30857E-05 | 0.013833687 |
| 1057.199981 | 612.38053  | 1.38206E-05 | 0.014611112 |
| 1057.239981 | 622.54075  | 1.40499E-05 | 0.014854092 |
| 1057.279981 | 567.874347 | 1.28161E-05 | 0.013550241 |
| 1057.319981 | 549.113679 | 1.23927E-05 | 0.013103082 |
| 1057.359981 | 506.951442 | 1.14412E-05 | 0.012097454 |
| 1057.399981 | 423.395343 | 9.55544E-06 | 0.010103925 |
| 1057.439981 | 343.730118 | 7.75751E-06 | 0.008203101 |
| 1057.479981 | 283.011597 | 6.38718E-06 | 0.006754312 |
| 1057.519981 | 251.779062 | 5.6823E-06  | 0.006009149 |
| 1057.559981 | 240.773265 | 5.43392E-06 | 0.005746693 |
| 1057.599981 | 236.705009 | 5.3421E-06  | 0.005649807 |
| 1057.639981 | 237.851299 | 5.36797E-06 | 0.005677382 |
| 1057.679981 | 260.945265 | 5.88917E-06 | 0.006228858 |
| 1057.719981 | 292.640973 | 6.6045E-06  | 0.006985711 |
| 1057.759981 | 296.066929 | 6.68182E-06 | 0.00706776  |
| 1057.799981 | 300.697778 | 6.78633E-06 | 0.00717858  |
| 1057.839981 | 306.084013 | 6.90789E-06 | 0.007307442 |
| 1057.879981 | 288.314618 | 6.50686E-06 | 0.006883476 |
| 1057.919981 | 266.639289 | 6.01768E-06 | 0.006366221 |
| 1057.959981 | 264.194709 | 5.96251E-06 | 0.006308093 |
| 1057.999981 | 273.586588 | 6.17447E-06 | 0.006532587 |
| 1058.039981 | 335.273458 | 7.56665E-06 | 0.008005823 |
| 1058.079981 | 412.987276 | 9.32055E-06 | 0.009861885 |
| 1058.119981 | 451.103188 | 1.01808E-05 | 0.010772477 |
| 1058.159981 | 491.376957 | 1.10897E-05 | 0.01173467  |
| 1058.199981 | 537.546792 | 1.21317E-05 | 0.012837746 |
| 1058.239981 | 550.146126 | 1.2416E-05  | 0.013139141 |
| 1058.279981 | 527.127603 | 1.18965E-05 | 0.012589866 |
| 1058.319981 | 492.109167 | 1.11062E-05 | 0.011753933 |
| 1058.359981 | 468.141966 | 1.05653E-05 | 0.011181904 |
| 1058.399981 | 428.231991 | 9.6646E-06  | 0.010229012 |
| 1058.439981 | 365.808341 | 8.25578E-06 | 0.008738253 |
| 1058.479981 | 309.61277  | 6.98753E-06 | 0.00739616  |
| 1058.519981 | 269.647639 | 6.08557E-06 | 0.006441699 |
| 1058.559981 | 262.246772 | 5.91854E-06 | 0.006265134 |
| 1058.599981 | 301.823494 | 6.81174E-06 | 0.007210903 |
| 1058.639981 | 340.597606 | 7.68681E-06 | 0.008137568 |
| 1058.679981 | 323.344527 | 7.29744E-06 | 0.007725649 |
| 1058.719981 | 298.776354 | 6.74297E-06 | 0.007138913 |
| 1058.759981 | 292.172133 | 6.59392E-06 | 0.006981377 |
| 1058.799981 | 282.158322 | 6.36792E-06 | 0.006742354 |
| 1058.839981 | 294.71066  | 6.65121E-06 | 0.007042566 |
| 1058.879981 | 314.033528 | 7.0873E-06  | 0.007504599 |
| 1058.919981 | 312.519562 | 7.05313E-06 | 0.007468702 |
| 1058.959981 | 308.15427  | 6.95461E-06 | 0.007364656 |

|             |            |             |             |
|-------------|------------|-------------|-------------|
| 1058.999981 | 337.746488 | 7.62247E-06 | 0.008072193 |
| 1059.039981 | 371.114539 | 8.37554E-06 | 0.00887003  |
| 1059.079981 | 446.776126 | 1.00831E-05 | 0.010678825 |
| 1059.119981 | 556.789529 | 1.2566E-05  | 0.013308864 |
| 1059.159981 | 648.89588  | 1.46447E-05 | 0.015511055 |
| 1059.199981 | 671.59957  | 1.51571E-05 | 0.016054365 |
| 1059.239981 | 653.70315  | 1.47532E-05 | 0.015627147 |
| 1059.279981 | 589.293972 | 1.32995E-05 | 0.014087941 |
| 1059.319981 | 525.49925  | 1.18598E-05 | 0.012563308 |
| 1059.359981 | 465.04333  | 1.04954E-05 | 0.011118386 |
| 1059.399981 | 411.368458 | 9.28401E-06 | 0.009835483 |
| 1059.439981 | 356.525656 | 8.04629E-06 | 0.008524559 |
| 1059.479981 | 311.013967 | 7.01915E-06 | 0.007436651 |
| 1059.519981 | 273.04901  | 6.16234E-06 | 0.006529118 |
| 1059.559981 | 234.527017 | 5.29295E-06 | 0.005608196 |
| 1059.599981 | 226.724797 | 5.11686E-06 | 0.005421828 |
| 1059.639981 | 257.876115 | 5.8199E-06  | 0.006167004 |
| 1059.679981 | 317.929196 | 7.17522E-06 | 0.007603436 |
| 1059.719981 | 354.068815 | 7.99084E-06 | 0.008468053 |
| 1059.759981 | 334.879332 | 7.55776E-06 | 0.008009412 |
| 1059.799981 | 285.787165 | 6.44982E-06 | 0.006835517 |
| 1059.839981 | 244.693683 | 5.5224E-06  | 0.005852856 |
| 1059.879981 | 234.899372 | 5.30135E-06 | 0.005618796 |
| 1059.919981 | 233.055336 | 5.25973E-06 | 0.005574897 |
| 1059.959981 | 242.234733 | 5.4669E-06  | 0.005794696 |
| 1059.999981 | 264.817432 | 5.97656E-06 | 0.006335154 |
| 1060.039981 | 286.582764 | 6.46777E-06 | 0.006856099 |
| 1060.079981 | 337.727211 | 7.62203E-06 | 0.008079964 |
| 1060.119981 | 408.484133 | 9.21892E-06 | 0.009773159 |
| 1060.159981 | 457.06332  | 1.03153E-05 | 0.01093585  |
| 1060.199981 | 493.36988  | 1.11347E-05 | 0.011804978 |
| 1060.239981 | 515.220012 | 1.16278E-05 | 0.012328256 |
| 1060.279981 | 509.472724 | 1.14981E-05 | 0.012191194 |
| 1060.319981 | 490.986124 | 1.10809E-05 | 0.011749271 |
| 1060.359981 | 455.733414 | 1.02853E-05 | 0.010906087 |
| 1060.399981 | 394.406339 | 8.9012E-06  | 0.009438834 |
| 1060.439981 | 345.036022 | 7.78698E-06 | 0.008257627 |
| 1060.479981 | 286.628414 | 6.4688E-06  | 0.006860037 |
| 1060.519981 | 246.288719 | 5.55839E-06 | 0.005894787 |
| 1060.559981 | 252.95409  | 5.70882E-06 | 0.006054548 |
| 1060.599981 | 246.893454 | 5.57204E-06 | 0.005909707 |
| 1060.639981 | 246.146162 | 5.55518E-06 | 0.005892042 |
| 1060.679981 | 272.823454 | 6.15725E-06 | 0.006530867 |
| 1060.719981 | 293.311584 | 6.61963E-06 | 0.007021578 |
| 1060.759981 | 269.739627 | 6.08765E-06 | 0.006457533 |
| 1060.799981 | 232.72903  | 5.25237E-06 | 0.005571714 |



|             |            |             |             |
|-------------|------------|-------------|-------------|
| 1060.839981 | 236.323773 | 5.3335E-06  | 0.005657988 |
| 1060.879981 | 275.086577 | 6.20832E-06 | 0.006586283 |
| 1060.919981 | 302.11087  | 6.81822E-06 | 0.007233587 |
| 1060.959981 | 323.612281 | 7.30348E-06 | 0.007748698 |
| 1060.999981 | 341.415212 | 7.70527E-06 | 0.008175287 |
| 1061.039981 | 385.902339 | 8.70928E-06 | 0.009240892 |
| 1061.079981 | 419.757873 | 9.47335E-06 | 0.010051983 |
| 1061.119981 | 482.995485 | 1.09005E-05 | 0.011566776 |
| 1061.159981 | 551.002032 | 1.24353E-05 | 0.013195894 |
| 1061.199981 | 600.489996 | 1.35522E-05 | 0.014381619 |
| 1061.239981 | 618.185268 | 1.39516E-05 | 0.014805975 |
| 1061.279981 | 614.344097 | 1.38649E-05 | 0.014714531 |
| 1061.319981 | 572.662006 | 1.29242E-05 | 0.013716695 |
| 1061.359981 | 490.444403 | 1.10686E-05 | 0.011747819 |
| 1061.399981 | 409.519736 | 9.24229E-06 | 0.009809766 |
| 1061.439981 | 355.939072 | 8.03305E-06 | 0.008526599 |
| 1061.479981 | 333.394325 | 7.52425E-06 | 0.007986836 |
| 1061.519981 | 319.916805 | 7.22008E-06 | 0.007664256 |
| 1061.559981 | 278.413128 | 6.2834E-06  | 0.006670202 |
| 1061.599981 | 247.152286 | 5.57788E-06 | 0.00592148  |
| 1061.639981 | 241.392057 | 5.44788E-06 | 0.00578369  |
| 1061.679981 | 261.389877 | 5.89921E-06 | 0.006263068 |
| 1061.719981 | 282.620835 | 6.37836E-06 | 0.006772031 |
| 1061.759981 | 271.147155 | 6.11941E-06 | 0.006497348 |
| 1061.799981 | 268.03615  | 6.0492E-06  | 0.006423043 |
| 1061.839981 | 263.436616 | 5.9454E-06  | 0.006313061 |
| 1061.879981 | 240.763443 | 5.4337E-06  | 0.005769933 |
| 1061.919981 | 227.6057   | 5.13674E-06 | 0.005454811 |
| 1061.959981 | 245.886177 | 5.54931E-06 | 0.005893144 |
| 1061.999981 | 284.141965 | 6.41269E-06 | 0.006810275 |
| 1062.039981 | 315.878244 | 7.12893E-06 | 0.007571211 |
| 1062.079981 | 348.16661  | 7.85764E-06 | 0.008345437 |
| 1062.119981 | 403.03688  | 9.09598E-06 | 0.009661023 |
| 1062.159981 | 440.871415 | 9.94985E-06 | 0.010568336 |
| 1062.199981 | 478.926727 | 1.08087E-05 | 0.011481011 |
| 1062.239981 | 515.228355 | 1.1628E-05  | 0.012351712 |
| 1062.279981 | 476.920435 | 1.07634E-05 | 0.011433776 |
| 1062.319981 | 445.881877 | 1.00629E-05 | 0.010690055 |
| 1062.359981 | 430.074996 | 9.70619E-06 | 0.010311472 |
| 1062.399981 | 371.180774 | 8.37703E-06 | 0.00889976  |
| 1062.439981 | 309.204442 | 6.97831E-06 | 0.007414039 |
| 1062.479981 | 272.70133  | 6.15449E-06 | 0.006539022 |
| 1062.519981 | 245.011398 | 5.52957E-06 | 0.005875274 |
| 1062.559981 | 235.798582 | 5.32165E-06 | 0.005654568 |
| 1062.599981 | 242.506051 | 5.47302E-06 | 0.005815635 |
| 1062.639981 | 290.128149 | 6.54779E-06 | 0.006957942 |

|             |            |             |             |
|-------------|------------|-------------|-------------|
| 1062.679981 | 332.941557 | 7.51403E-06 | 0.007985006 |
| 1062.719981 | 335.029322 | 7.56115E-06 | 0.00803538  |
| 1062.759981 | 326.173178 | 7.36127E-06 | 0.007823268 |
| 1062.799981 | 294.384831 | 6.64386E-06 | 0.00706109  |
| 1062.839981 | 255.844456 | 5.77405E-06 | 0.006136894 |
| 1062.879981 | 258.243229 | 5.82819E-06 | 0.006194666 |
| 1062.919981 | 284.235719 | 6.4148E-06  | 0.006818424 |
| 1062.959981 | 312.50879  | 7.05289E-06 | 0.007496938 |
| 1062.999981 | 341.431276 | 7.70563E-06 | 0.008191083 |
| 1063.039981 | 404.38714  | 9.12645E-06 | 0.009701786 |
| 1063.079981 | 490.37095  | 1.1067E-05  | 0.011765095 |
| 1063.119981 | 548.233482 | 1.23729E-05 | 0.013153841 |
| 1063.159981 | 598.265127 | 1.3502E-05  | 0.014354797 |
| 1063.199981 | 657.880168 | 1.48474E-05 | 0.015785797 |
| 1063.239981 | 673.470388 | 1.51993E-05 | 0.016160491 |
| 1063.279981 | 668.007231 | 1.5076E-05  | 0.016030001 |
| 1063.319981 | 613.579343 | 1.38476E-05 | 0.014724463 |
| 1063.359981 | 549.543273 | 1.24024E-05 | 0.013188244 |
| 1063.399981 | 469.027536 | 1.05853E-05 | 0.011256406 |
| 1063.439981 | 374.390721 | 8.44948E-06 | 0.008985512 |
| 1063.479981 | 311.058501 | 7.02016E-06 | 0.007465797 |
| 1063.519981 | 266.622049 | 6.01729E-06 | 0.006399506 |
| 1063.559981 | 266.649869 | 6.01792E-06 | 0.006400415 |
| 1063.599981 | 294.307817 | 6.64212E-06 | 0.007064556 |
| 1063.639981 | 312.12617  | 7.04425E-06 | 0.007492549 |
| 1063.679981 | 329.753154 | 7.44207E-06 | 0.00791598  |
| 1063.719981 | 372.529627 | 8.40747E-06 | 0.008943199 |
| 1063.759981 | 429.08638  | 9.68388E-06 | 0.010301326 |
| 1063.799981 | 427.100798 | 9.63907E-06 | 0.010254043 |
| 1063.839981 | 352.820539 | 7.96267E-06 | 0.008471005 |
| 1063.879981 | 278.119821 | 6.27678E-06 | 0.006677737 |
| 1063.919981 | 248.159358 | 5.60061E-06 | 0.005958602 |
| 1063.959981 | 263.956857 | 5.95714E-06 | 0.006338157 |
| 1063.999981 | 297.592227 | 6.71624E-06 | 0.007146081 |
| 1064.039981 | 353.052411 | 7.9679E-06  | 0.008478165 |
| 1064.079981 | 391.942978 | 8.84561E-06 | 0.009412433 |
| 1064.119981 | 413.083913 | 9.32273E-06 | 0.009920502 |
| 1064.159981 | 471.247696 | 1.06354E-05 | 0.011317771 |
| 1064.199981 | 535.922052 | 1.2095E-05  | 0.012871514 |
| 1064.239981 | 574.720381 | 1.29706E-05 | 0.013803872 |
| 1064.279981 | 558.885542 | 1.26133E-05 | 0.013424049 |
| 1064.319981 | 535.424619 | 1.20838E-05 | 0.012861017 |
| 1064.359981 | 506.22644  | 1.14248E-05 | 0.012160127 |
| 1064.399981 | 426.792406 | 9.63211E-06 | 0.010252418 |
| 1064.439981 | 346.988063 | 7.83104E-06 | 0.008335669 |
| 1064.479981 | 289.42503  | 6.53192E-06 | 0.006953098 |

|             |            |             |             |
|-------------|------------|-------------|-------------|
| 1064.519981 | 255.965835 | 5.77679E-06 | 0.006149511 |
| 1064.559981 | 265.322349 | 5.98796E-06 | 0.006374538 |
| 1064.599981 | 306.606302 | 6.91968E-06 | 0.007366688 |
| 1064.639981 | 308.796597 | 6.96911E-06 | 0.007419592 |
| 1064.679981 | 303.702597 | 6.85414E-06 | 0.007297471 |
| 1064.719981 | 301.961098 | 6.81484E-06 | 0.007255898 |
| 1064.759981 | 288.426705 | 6.50939E-06 | 0.006930937 |
| 1064.799981 | 271.977991 | 6.13816E-06 | 0.006535917 |
| 1064.839981 | 257.781644 | 5.81777E-06 | 0.006194997 |
| 1064.879981 | 256.347482 | 5.78541E-06 | 0.006160763 |
| 1064.919981 | 287.922055 | 6.498E-06   | 0.00691985  |
| 1064.959981 | 316.502464 | 7.14302E-06 | 0.00760703  |
| 1064.999981 | 343.309892 | 7.74803E-06 | 0.008251648 |
| 1065.039981 | 399.842336 | 9.02388E-06 | 0.009610798 |
| 1065.079981 | 444.742131 | 1.00372E-05 | 0.010690432 |
| 1065.119981 | 503.142728 | 1.13552E-05 | 0.012094683 |
| 1065.159981 | 555.668296 | 1.25407E-05 | 0.013357809 |
| 1065.199981 | 585.647663 | 1.32173E-05 | 0.014079017 |
| 1065.239981 | 577.544456 | 1.30344E-05 | 0.013884736 |
| 1065.279981 | 543.848533 | 1.22739E-05 | 0.013075144 |
| 1065.319981 | 527.057043 | 1.18949E-05 | 0.012671921 |
| 1065.359981 | 460.459483 | 1.03919E-05 | 0.011071145 |
| 1065.399981 | 370.932671 | 8.37143E-06 | 0.008918925 |
| 1065.439981 | 318.797786 | 7.19482E-06 | 0.007665651 |
| 1065.479981 | 292.769452 | 6.6074E-06  | 0.007040051 |
| 1065.519981 | 267.782887 | 6.04349E-06 | 0.006439456 |
| 1065.559981 | 245.652367 | 5.54403E-06 | 0.005907498 |
| 1065.599981 | 257.990025 | 5.82248E-06 | 0.00620443  |
| 1065.639981 | 301.681055 | 6.80852E-06 | 0.007255432 |
| 1065.679981 | 303.264911 | 6.84427E-06 | 0.007293798 |
| 1065.719981 | 278.623673 | 6.28815E-06 | 0.006701405 |
| 1065.759981 | 254.398343 | 5.74142E-06 | 0.006118972 |
| 1065.799981 | 266.476182 | 6.014E-06   | 0.006409717 |
| 1065.839981 | 293.744368 | 6.6294E-06  | 0.007065881 |
| 1065.879981 | 280.330787 | 6.32668E-06 | 0.006743477 |
| 1065.919981 | 249.912487 | 5.64018E-06 | 0.006011977 |
| 1065.959981 | 245.873227 | 5.54902E-06 | 0.005915029 |
| 1065.999981 | 255.105818 | 5.75738E-06 | 0.00613737  |
| 1066.039981 | 283.493742 | 6.39806E-06 | 0.006820587 |
| 1066.079981 | 337.671828 | 7.62078E-06 | 0.008124364 |
| 1066.119981 | 398.829097 | 9.00102E-06 | 0.009596164 |
| 1066.159981 | 440.538636 | 9.94234E-06 | 0.010600129 |
| 1066.199981 | 472.273416 | 1.06586E-05 | 0.011364149 |
| 1066.239981 | 535.994864 | 1.20967E-05 | 0.01289794  |
| 1066.279981 | 541.805511 | 1.22278E-05 | 0.013038254 |
| 1066.319981 | 463.603108 | 1.04629E-05 | 0.011156774 |

|             |            |             |             |
|-------------|------------|-------------|-------------|
| 1066.359981 | 396.3574   | 8.94523E-06 | 0.00953884  |
| 1066.399981 | 361.895355 | 8.16747E-06 | 0.008709794 |
| 1066.439981 | 326.290547 | 7.36392E-06 | 0.007853182 |
| 1066.479981 | 278.625986 | 6.2882E-06  | 0.00670624  |
| 1066.519981 | 244.239773 | 5.51215E-06 | 0.00587882  |
| 1066.559981 | 262.367191 | 5.92126E-06 | 0.006315381 |
| 1066.599981 | 298.571545 | 6.73834E-06 | 0.007187117 |
| 1066.639981 | 301.156543 | 6.79668E-06 | 0.007249615 |
| 1066.679981 | 285.055921 | 6.43332E-06 | 0.006862288 |
| 1066.719981 | 297.029807 | 6.70355E-06 | 0.00715081  |
| 1066.759981 | 279.753144 | 6.31364E-06 | 0.006735137 |
| 1066.799981 | 242.477622 | 5.47238E-06 | 0.005837937 |
| 1066.839981 | 248.673982 | 5.61223E-06 | 0.005987346 |
| 1066.879981 | 282.913896 | 6.38497E-06 | 0.006811999 |
| 1066.919981 | 283.65913  | 6.40179E-06 | 0.006830199 |
| 1066.959981 | 264.077208 | 5.95985E-06 | 0.006358927 |
| 1066.999981 | 286.68815  | 6.47015E-06 | 0.006903652 |
| 1067.039981 | 367.283259 | 8.28907E-06 | 0.008844771 |
| 1067.079981 | 469.063744 | 1.05861E-05 | 0.011296232 |
| 1067.119981 | 555.129651 | 1.25285E-05 | 0.013369416 |
| 1067.159981 | 603.172178 | 1.36128E-05 | 0.014526988 |
| 1067.199981 | 623.248483 | 1.40659E-05 | 0.015011075 |
| 1067.239981 | 615.509269 | 1.38912E-05 | 0.01482523  |
| 1067.279981 | 577.097146 | 1.30243E-05 | 0.013900552 |
| 1067.319981 | 526.362301 | 1.18793E-05 | 0.012678976 |
| 1067.359981 | 462.426198 | 1.04363E-05 | 0.011139305 |
| 1067.399981 | 405.398557 | 9.14928E-06 | 0.009765942 |
| 1067.439981 | 350.863694 | 7.9185E-06  | 0.008452529 |
| 1067.479981 | 298.153785 | 6.72892E-06 | 0.007182983 |
| 1067.519981 | 276.885516 | 6.24892E-06 | 0.006670847 |
| 1067.559981 | 269.483667 | 6.08187E-06 | 0.006492762 |
| 1067.599981 | 275.868944 | 6.22598E-06 | 0.006646854 |
| 1067.639981 | 303.450771 | 6.84846E-06 | 0.007311691 |
| 1067.679981 | 323.281867 | 7.29602E-06 | 0.007789816 |
| 1067.719981 | 291.0854   | 6.56939E-06 | 0.007014271 |
| 1067.759981 | 260.769203 | 5.8852E-06  | 0.006283979 |
| 1067.799981 | 299.647635 | 6.76263E-06 | 0.007221136 |
| 1067.839981 | 311.874049 | 7.03856E-06 | 0.007516059 |
| 1067.879981 | 291.362141 | 6.57564E-06 | 0.007021992 |
| 1067.919981 | 263.133369 | 5.93855E-06 | 0.0063419   |
| 1067.959981 | 247.776118 | 5.59196E-06 | 0.005971991 |
| 1067.999981 | 265.561089 | 5.99334E-06 | 0.006400891 |
| 1068.039981 | 311.262153 | 7.02475E-06 | 0.007502717 |
| 1068.079981 | 364.262939 | 8.22091E-06 | 0.008780586 |
| 1068.119981 | 440.071608 | 9.9318E-06  | 0.010608357 |
| 1068.159981 | 543.366812 | 1.2263E-05  | 0.01309888  |

|             |            |             |             |
|-------------|------------|-------------|-------------|
| 1068.199981 | 580.284698 | 1.30962E-05 | 0.013989379 |
| 1068.239981 | 551.115555 | 1.24379E-05 | 0.013286673 |
| 1068.279981 | 539.866138 | 1.2184E-05  | 0.013015952 |
| 1068.319981 | 515.240516 | 1.16283E-05 | 0.012422703 |
| 1068.359981 | 431.316112 | 9.7342E-06  | 0.010399634 |
| 1068.399981 | 355.587788 | 8.02512E-06 | 0.008574039 |
| 1068.439981 | 312.650238 | 7.05608E-06 | 0.007538998 |
| 1068.479981 | 288.416084 | 6.50915E-06 | 0.006954896 |
| 1068.519981 | 285.077382 | 6.4338E-06  | 0.006874643 |
| 1068.559981 | 293.061928 | 6.614E-06   | 0.007067455 |
| 1068.599981 | 308.224729 | 6.9562E-06  | 0.007433398 |
| 1068.639981 | 348.455274 | 7.86415E-06 | 0.008403945 |
| 1068.679981 | 354.04657  | 7.99034E-06 | 0.008539114 |
| 1068.719981 | 327.130958 | 7.38289E-06 | 0.007890242 |
| 1068.759981 | 311.155993 | 7.02236E-06 | 0.007505215 |
| 1068.799981 | 299.763188 | 6.76524E-06 | 0.007230686 |
| 1068.839981 | 290.277537 | 6.55116E-06 | 0.007002141 |
| 1068.879981 | 259.079574 | 5.84707E-06 | 0.006249811 |
| 1068.919981 | 268.281861 | 6.05475E-06 | 0.006472041 |
| 1068.959981 | 320.520214 | 7.23369E-06 | 0.00773253  |
| 1068.999981 | 343.560033 | 7.75367E-06 | 0.008288675 |
| 1069.039981 | 372.976351 | 8.41756E-06 | 0.008998705 |
| 1069.079981 | 442.203505 | 9.97992E-06 | 0.01066933  |
| 1069.119981 | 567.049621 | 1.27975E-05 | 0.013682084 |
| 1069.159981 | 641.384486 | 1.44752E-05 | 0.015476256 |
| 1069.199981 | 677.186991 | 1.52832E-05 | 0.016340762 |
| 1069.239981 | 692.815874 | 1.56359E-05 | 0.016718518 |
| 1069.279981 | 642.170087 | 1.44929E-05 | 0.015496951 |
| 1069.319981 | 585.475802 | 1.32134E-05 | 0.014129324 |
| 1069.359981 | 506.508708 | 1.14312E-05 | 0.012224064 |
| 1069.399981 | 386.392387 | 8.72034E-06 | 0.009325529 |
| 1069.439981 | 299.55405  | 6.76052E-06 | 0.007229968 |
| 1069.479981 | 269.28308  | 6.07734E-06 | 0.006499598 |
| 1069.519981 | 251.416845 | 5.67413E-06 | 0.006068593 |
| 1069.559981 | 245.117806 | 5.53197E-06 | 0.005916771 |
| 1069.599981 | 278.879015 | 6.29391E-06 | 0.006731967 |
| 1069.639981 | 284.7641   | 6.42673E-06 | 0.006874286 |
| 1069.679981 | 277.956257 | 6.27309E-06 | 0.006710194 |
| 1069.719981 | 285.463364 | 6.44251E-06 | 0.006891682 |
| 1069.759981 | 274.115802 | 6.18641E-06 | 0.006617976 |
| 1069.799981 | 262.168784 | 5.91678E-06 | 0.006329776 |
| 1069.839981 | 260.952519 | 5.88933E-06 | 0.006300646 |
| 1069.879981 | 239.36427  | 5.40212E-06 | 0.005779618 |
| 1069.919981 | 219.863299 | 4.96201E-06 | 0.005308952 |
| 1069.959981 | 239.176722 | 5.39789E-06 | 0.005775521 |
| 1069.999981 | 269.290555 | 6.07751E-06 | 0.006502939 |

|             |            |             |             |
|-------------|------------|-------------|-------------|
| 1070.039981 | 293.978467 | 6.63468E-06 | 0.007099378 |
| 1070.079981 | 323.625929 | 7.30379E-06 | 0.007815636 |
| 1070.119981 | 390.668097 | 8.81683E-06 | 0.009435071 |
| 1070.159981 | 491.751246 | 1.10981E-05 | 0.011876786 |
| 1070.199981 | 550.139801 | 1.24159E-05 | 0.013287484 |
| 1070.239981 | 512.347064 | 1.1563E-05  | 0.012375142 |
| 1070.279981 | 457.290184 | 1.03204E-05 | 0.01104572  |
| 1070.319981 | 420.901349 | 9.49916E-06 | 0.010167138 |
| 1070.359981 | 392.801603 | 8.86499E-06 | 0.009488725 |
| 1070.399981 | 362.034946 | 8.17062E-06 | 0.008745836 |
| 1070.439981 | 324.94793  | 7.33362E-06 | 0.007850202 |
| 1070.479981 | 295.716861 | 6.67392E-06 | 0.007144295 |
| 1070.519981 | 280.685141 | 6.33467E-06 | 0.006781394 |
| 1070.559981 | 274.413005 | 6.19312E-06 | 0.006630106 |
| 1070.599981 | 298.210927 | 6.73021E-06 | 0.007205358 |
| 1070.639981 | 312.519418 | 7.05313E-06 | 0.007551361 |
| 1070.679981 | 314.627867 | 7.10071E-06 | 0.007602591 |
| 1070.719981 | 326.344847 | 7.36515E-06 | 0.007886012 |
| 1070.759981 | 332.888839 | 7.51284E-06 | 0.008044446 |
| 1070.799981 | 330.167213 | 7.45141E-06 | 0.007978974 |
| 1070.839981 | 314.283962 | 7.09295E-06 | 0.007595416 |
| 1070.879981 | 293.479976 | 6.62343E-06 | 0.007092903 |
| 1070.919981 | 280.917032 | 6.33991E-06 | 0.006789532 |
| 1070.959981 | 284.924962 | 6.43036E-06 | 0.006886658 |
| 1070.999981 | 317.494551 | 7.16541E-06 | 0.007674154 |
| 1071.039981 | 362.436249 | 8.17968E-06 | 0.008760766 |
| 1071.079981 | 432.857585 | 9.76899E-06 | 0.010463373 |
| 1071.119981 | 524.491499 | 1.1837E-05  | 0.012678893 |
| 1071.159981 | 570.991658 | 1.28865E-05 | 0.013803489 |
| 1071.199981 | 584.062999 | 1.31815E-05 | 0.01412001  |
| 1071.239981 | 634.953457 | 1.433E-05   | 0.015350885 |
| 1071.279981 | 651.539311 | 1.47043E-05 | 0.015752459 |
| 1071.319981 | 579.166788 | 1.3071E-05  | 0.01400321  |
| 1071.359981 | 489.30547  | 1.10429E-05 | 0.011830967 |
| 1071.399981 | 399.657678 | 9.01972E-06 | 0.009663725 |
| 1071.439981 | 328.215494 | 7.40737E-06 | 0.007936549 |
| 1071.479981 | 271.668365 | 6.13118E-06 | 0.006569433 |
| 1071.519981 | 250.780551 | 5.65977E-06 | 0.006064554 |
| 1071.559981 | 266.061269 | 6.00463E-06 | 0.006434324 |
| 1071.599981 | 263.668542 | 5.95063E-06 | 0.006376697 |
| 1071.639981 | 274.057932 | 6.18511E-06 | 0.006628207 |
| 1071.679981 | 283.736219 | 6.40353E-06 | 0.006862536 |
| 1071.719981 | 300.853015 | 6.78983E-06 | 0.0072768   |
| 1071.759981 | 309.210813 | 6.97846E-06 | 0.007479231 |
| 1071.799981 | 304.077994 | 6.86262E-06 | 0.007355353 |
| 1071.839981 | 293.146516 | 6.61591E-06 | 0.007091195 |

|             |            |             |             |
|-------------|------------|-------------|-------------|
| 1071.879981 | 274.761332 | 6.20098E-06 | 0.006646707 |
| 1071.919981 | 274.889553 | 6.20387E-06 | 0.006650057 |
| 1071.959981 | 296.61489  | 6.69418E-06 | 0.007175898 |
| 1071.999981 | 309.731842 | 6.99022E-06 | 0.007493512 |
| 1072.039981 | 336.476265 | 7.5938E-06  | 0.008140858 |
| 1072.079981 | 401.105473 | 9.05239E-06 | 0.009704888 |
| 1072.119981 | 485.380707 | 1.09544E-05 | 0.011744395 |
| 1072.159981 | 536.521219 | 1.21085E-05 | 0.012982288 |
| 1072.199981 | 578.289764 | 1.30512E-05 | 0.01399349  |
| 1072.239981 | 596.283466 | 1.34573E-05 | 0.014429441 |
| 1072.279981 | 555.472481 | 1.25362E-05 | 0.013442359 |
| 1072.319981 | 488.818004 | 1.10319E-05 | 0.011829771 |
| 1072.359981 | 425.316454 | 9.5988E-06  | 0.010293369 |
| 1072.399981 | 379.022505 | 8.55401E-06 | 0.00917332  |
| 1072.43998  | 310.096661 | 6.99845E-06 | 0.007505417 |
| 1072.47998  | 258.772867 | 5.84014E-06 | 0.006263437 |
| 1072.51998  | 248.691094 | 5.61261E-06 | 0.006019638 |
| 1072.55998  | 265.4749   | 5.9914E-06  | 0.006426134 |
| 1072.59998  | 295.341904 | 6.66546E-06 | 0.007149367 |
| 1072.63998  | 292.41071  | 6.5993E-06  | 0.007078676 |
| 1072.67998  | 294.927902 | 6.65611E-06 | 0.007139878 |
| 1072.71998  | 302.164663 | 6.81944E-06 | 0.007315345 |
| 1072.75998  | 333.517191 | 7.52702E-06 | 0.008074684 |
| 1072.79998  | 330.390322 | 7.45645E-06 | 0.007999279 |
| 1072.83998  | 301.08579  | 6.79509E-06 | 0.007290041 |
| 1072.87998  | 295.75718  | 6.67483E-06 | 0.007161289 |
| 1072.91998  | 299.62635  | 6.76215E-06 | 0.007255245 |
| 1072.95998  | 294.289895 | 6.64171E-06 | 0.007126292 |
| 1072.99998  | 312.309014 | 7.04838E-06 | 0.007562911 |
| 1073.03998  | 347.343356 | 7.83906E-06 | 0.00841162  |
| 1073.07998  | 401.451309 | 9.0602E-06  | 0.009722316 |
| 1073.11998  | 449.207941 | 1.0138E-05  | 0.010879288 |
| 1073.15998  | 513.947518 | 1.15991E-05 | 0.012447668 |
| 1073.19998  | 596.858094 | 1.34703E-05 | 0.014456278 |
| 1073.23998  | 627.755285 | 1.41676E-05 | 0.015205194 |
| 1073.27998  | 615.309455 | 1.38867E-05 | 0.014904293 |
| 1073.31998  | 577.980016 | 1.30442E-05 | 0.014000605 |
| 1073.35998  | 484.152463 | 1.09266E-05 | 0.011728225 |
| 1073.39998  | 385.689086 | 8.70447E-06 | 0.009343373 |
| 1073.43998  | 351.154425 | 7.92507E-06 | 0.008507083 |
| 1073.47998  | 308.054102 | 6.95235E-06 | 0.007463211 |
| 1073.51998  | 271.056198 | 6.11736E-06 | 0.006567109 |
| 1073.55998  | 258.879206 | 5.84254E-06 | 0.00627232  |
| 1073.59998  | 262.844966 | 5.93204E-06 | 0.006368643 |
| 1073.63998  | 285.048148 | 6.43314E-06 | 0.006906876 |
| 1073.67998  | 291.075804 | 6.56918E-06 | 0.007053192 |

|            |            |             |             |
|------------|------------|-------------|-------------|
| 1073.71998 | 303.259663 | 6.84415E-06 | 0.007348699 |
| 1073.75998 | 306.711633 | 6.92205E-06 | 0.007432625 |
| 1073.79998 | 286.102216 | 6.45693E-06 | 0.00693345  |
| 1073.83998 | 264.789485 | 5.97593E-06 | 0.006417192 |
| 1073.87998 | 268.214849 | 6.05324E-06 | 0.006500448 |
| 1073.91998 | 275.398453 | 6.21536E-06 | 0.006674799 |
| 1073.95998 | 266.653974 | 6.01801E-06 | 0.006463101 |
| 1073.99998 | 278.274861 | 6.28028E-06 | 0.006745016 |
| 1074.03998 | 320.242808 | 7.22743E-06 | 0.007762553 |
| 1074.07998 | 410.59036  | 9.26645E-06 | 0.009952911 |
| 1074.11998 | 508.670539 | 1.148E-05   | 0.012330882 |
| 1074.15998 | 551.966372 | 1.24571E-05 | 0.013380931 |
| 1074.19998 | 559.136357 | 1.26189E-05 | 0.013555253 |
| 1074.23998 | 568.306214 | 1.28259E-05 | 0.013778073 |
| 1074.27998 | 571.248047 | 1.28923E-05 | 0.01384991  |
| 1074.31998 | 539.492438 | 1.21756E-05 | 0.013080483 |
| 1074.35998 | 497.596068 | 1.12301E-05 | 0.012065116 |
| 1074.39998 | 437.409357 | 9.87172E-06 | 0.010606176 |
| 1074.43998 | 361.968507 | 8.16913E-06 | 0.008777235 |
| 1074.47998 | 297.002831 | 6.70294E-06 | 0.007202175 |
| 1074.51998 | 267.672768 | 6.041E-06   | 0.006491177 |
| 1074.55998 | 277.748216 | 6.26839E-06 | 0.006735761 |
| 1074.59998 | 272.961927 | 6.16037E-06 | 0.006619934 |
| 1074.63998 | 280.191219 | 6.32353E-06 | 0.006795513 |
| 1074.67998 | 311.76541  | 7.03611E-06 | 0.007561568 |
| 1074.71998 | 330.808244 | 7.46588E-06 | 0.008023732 |
| 1074.75998 | 321.694088 | 7.26019E-06 | 0.007802959 |
| 1074.79998 | 329.651082 | 7.43977E-06 | 0.00799626  |
| 1074.83998 | 337.227761 | 7.61076E-06 | 0.00818035  |
| 1074.87998 | 319.546605 | 7.21172E-06 | 0.007751735 |
| 1074.91998 | 309.183568 | 6.97784E-06 | 0.007500622 |
| 1074.95998 | 300.549133 | 6.78298E-06 | 0.007291427 |
| 1074.99998 | 309.374026 | 6.98214E-06 | 0.007505801 |
| 1075.03998 | 375.887821 | 8.48326E-06 | 0.009119849 |
| 1075.07998 | 441.445197 | 9.9628E-06  | 0.01071081  |
| 1075.11998 | 506.280878 | 1.14261E-05 | 0.012284379 |
| 1075.15998 | 592.992292 | 1.3383E-05  | 0.014388877 |
| 1075.19998 | 655.530168 | 1.47944E-05 | 0.015906942 |
| 1075.23998 | 718.69606  | 1.622E-05   | 0.017440359 |
| 1075.27998 | 723.313442 | 1.63242E-05 | 0.017553061 |
| 1075.31998 | 633.634106 | 1.43002E-05 | 0.015377333 |
| 1075.35998 | 518.928514 | 1.17115E-05 | 0.012594072 |
| 1075.39998 | 413.151631 | 9.32426E-06 | 0.010027306 |
| 1075.43998 | 330.275766 | 7.45386E-06 | 0.008016183 |
| 1075.47998 | 291.382673 | 6.5761E-06  | 0.007072465 |
| 1075.51998 | 275.277247 | 6.21262E-06 | 0.006681801 |



|            |            |             |             |
|------------|------------|-------------|-------------|
| 1075.55998 | 259.358664 | 5.85336E-06 | 0.006295644 |
| 1075.59998 | 252.949054 | 5.70871E-06 | 0.006140286 |
| 1075.63998 | 263.791745 | 5.95341E-06 | 0.006403728 |
| 1075.67998 | 262.416085 | 5.92237E-06 | 0.00637057  |
| 1075.71998 | 254.136725 | 5.73551E-06 | 0.006169805 |
| 1075.75998 | 263.032029 | 5.93627E-06 | 0.006385998 |
| 1075.79998 | 274.645655 | 6.19837E-06 | 0.006668206 |
| 1075.83998 | 262.614923 | 5.92685E-06 | 0.006376345 |
| 1075.87998 | 262.644913 | 5.92753E-06 | 0.006377311 |
| 1075.91998 | 270.397715 | 6.1025E-06  | 0.006565801 |
| 1075.95998 | 272.486186 | 6.14963E-06 | 0.00661676  |
| 1075.99998 | 304.657514 | 6.8757E-06  | 0.007398248 |
| 1076.03998 | 330.796479 | 7.46562E-06 | 0.008033301 |
| 1076.07998 | 352.411454 | 7.95344E-06 | 0.008558533 |
| 1076.11998 | 412.417159 | 9.30768E-06 | 0.010016181 |
| 1076.15998 | 491.216356 | 1.10861E-05 | 0.011930384 |
| 1076.19998 | 546.516339 | 1.23341E-05 | 0.013273972 |
| 1076.23998 | 551.915268 | 1.2456E-05  | 0.013405601 |
| 1076.27998 | 534.058206 | 1.20529E-05 | 0.012972349 |
| 1076.31998 | 503.77216  | 1.13694E-05 | 0.012237151 |
| 1076.35998 | 422.463056 | 9.5344E-06  | 0.01026245  |
| 1076.39998 | 373.611819 | 8.4319E-06  | 0.009076095 |
| 1076.43998 | 341.358724 | 7.70399E-06 | 0.008292884 |
| 1076.47998 | 317.584525 | 7.16744E-06 | 0.007715606 |
| 1076.51998 | 302.629758 | 6.82993E-06 | 0.007352558 |
| 1076.55998 | 275.790363 | 6.2242E-06  | 0.006700729 |
| 1076.59998 | 273.044585 | 6.16224E-06 | 0.006634263 |
| 1076.63998 | 279.688693 | 6.31218E-06 | 0.00679595  |
| 1076.67998 | 283.822105 | 6.40547E-06 | 0.006896641 |
| 1076.71998 | 304.312388 | 6.86791E-06 | 0.007394812 |
| 1076.75998 | 316.267339 | 7.13771E-06 | 0.007685604 |
| 1076.79998 | 318.648482 | 7.19145E-06 | 0.007743756 |
| 1076.83998 | 286.480568 | 6.46547E-06 | 0.006962274 |
| 1076.87998 | 259.886327 | 5.86527E-06 | 0.006316194 |
| 1076.91998 | 253.171232 | 5.71372E-06 | 0.006153221 |
| 1076.95998 | 275.955323 | 6.22793E-06 | 0.006707228 |
| 1076.99998 | 325.409855 | 7.34405E-06 | 0.007909539 |
| 1077.03998 | 374.364809 | 8.44889E-06 | 0.009099795 |
| 1077.07998 | 454.148187 | 1.02495E-05 | 0.011039523 |
| 1077.11998 | 525.415069 | 1.18579E-05 | 0.012772366 |
| 1077.15998 | 607.68889  | 1.37147E-05 | 0.014772917 |
| 1077.19998 | 654.757158 | 1.4777E-05  | 0.015917738 |
| 1077.23998 | 631.985741 | 1.4263E-05  | 0.015364715 |
| 1077.27998 | 572.402213 | 1.29183E-05 | 0.013916648 |
| 1077.31998 | 498.974752 | 1.12612E-05 | 0.012131878 |
| 1077.35998 | 442.60193  | 9.98891E-06 | 0.010761651 |

|            |            |             |             |
|------------|------------|-------------|-------------|
| 1077.39998 | 373.519263 | 8.42981E-06 | 0.009082277 |
| 1077.43998 | 289.345    | 6.53011E-06 | 0.007035805 |
| 1077.47998 | 262.332257 | 5.92047E-06 | 0.006379192 |
| 1077.51998 | 267.738979 | 6.0425E-06  | 0.00651091  |
| 1077.55998 | 250.739226 | 5.65884E-06 | 0.006097734 |
| 1077.59998 | 244.7477   | 5.52361E-06 | 0.005952247 |
| 1077.63998 | 265.193406 | 5.98505E-06 | 0.006449725 |
| 1077.67998 | 294.756045 | 6.65223E-06 | 0.007168979 |
| 1077.71998 | 309.381752 | 6.98232E-06 | 0.007524981 |
| 1077.75998 | 301.323789 | 6.80046E-06 | 0.007329262 |
| 1077.79998 | 282.734054 | 6.38091E-06 | 0.006877349 |
| 1077.83998 | 279.859946 | 6.31605E-06 | 0.00680769  |
| 1077.87998 | 288.053464 | 6.50097E-06 | 0.007007261 |
| 1077.91998 | 284.392282 | 6.41834E-06 | 0.006918454 |
| 1077.95998 | 280.320957 | 6.32645E-06 | 0.006819664 |
| 1077.99998 | 286.748018 | 6.4715E-06  | 0.00697628  |
| 1078.03998 | 315.652006 | 7.12383E-06 | 0.007679769 |
| 1078.07998 | 390.624854 | 8.81586E-06 | 0.009504201 |
| 1078.11998 | 465.660538 | 1.05093E-05 | 0.011330297 |
| 1078.15998 | 493.055846 | 1.11276E-05 | 0.011997315 |
| 1078.19998 | 535.169389 | 1.2078E-05  | 0.013022529 |
| 1078.23998 | 539.41101  | 1.21738E-05 | 0.01312623  |
| 1078.27998 | 524.987523 | 1.18482E-05 | 0.012775717 |
| 1078.31998 | 473.592524 | 1.06883E-05 | 0.011525433 |
| 1078.35998 | 410.633569 | 9.26743E-06 | 0.009993623 |
| 1078.39998 | 360.275393 | 8.13091E-06 | 0.008768377 |
| 1078.43998 | 324.264675 | 7.3182E-06  | 0.007892242 |
| 1078.47998 | 274.647093 | 6.1984E-06  | 0.006684853 |
| 1078.51998 | 256.993611 | 5.79999E-06 | 0.006255403 |
| 1078.55998 | 257.401684 | 5.8092E-06  | 0.006265568 |
| 1078.59998 | 279.582866 | 6.3098E-06  | 0.006805746 |
| 1078.63998 | 312.994328 | 7.06385E-06 | 0.007619347 |
| 1078.67998 | 311.283407 | 7.02523E-06 | 0.007577978 |
| 1078.71998 | 295.791296 | 6.6756E-06  | 0.0072011   |
| 1078.75998 | 277.791918 | 6.26938E-06 | 0.006763153 |
| 1078.79998 | 267.536845 | 6.03793E-06 | 0.006513723 |
| 1078.83998 | 250.452211 | 5.65236E-06 | 0.006097989 |
| 1078.87998 | 239.844321 | 5.41295E-06 | 0.005839926 |
| 1078.91998 | 271.687872 | 6.13162E-06 | 0.006615524 |
| 1078.95998 | 297.165233 | 6.70661E-06 | 0.007236159 |
| 1078.99998 | 312.064331 | 7.04286E-06 | 0.007599243 |
| 1079.03998 | 339.054007 | 7.65198E-06 | 0.008256789 |
| 1079.07998 | 399.149936 | 9.00826E-06 | 0.009720631 |
| 1079.11998 | 451.878837 | 1.01983E-05 | 0.011005163 |
| 1079.15998 | 515.985912 | 1.16451E-05 | 0.012566908 |
| 1079.19998 | 580.394328 | 1.30987E-05 | 0.014136108 |

|            |            |             |             |
|------------|------------|-------------|-------------|
| 1079.23998 | 606.082848 | 1.36784E-05 | 0.014762325 |
| 1079.27998 | 563.27164  | 1.27123E-05 | 0.013720084 |
| 1079.31998 | 510.731124 | 1.15265E-05 | 0.012440771 |
| 1079.35998 | 447.41424  | 1.00975E-05 | 0.010898855 |
| 1079.39998 | 357.138141 | 8.06011E-06 | 0.008700083 |
| 1079.43998 | 284.275437 | 6.4157E-06  | 0.006925364 |
| 1079.47998 | 265.077125 | 5.98242E-06 | 0.006457904 |
| 1079.51998 | 264.021305 | 5.95859E-06 | 0.00643242  |
| 1079.55998 | 257.190911 | 5.80444E-06 | 0.006266242 |
| 1079.59998 | 230.782513 | 5.20844E-06 | 0.005623032 |
| 1079.63998 | 219.974677 | 4.96452E-06 | 0.005359896 |
| 1079.67998 | 262.788416 | 5.93077E-06 | 0.006403332 |
| 1079.71998 | 274.493684 | 6.19494E-06 | 0.006688801 |
| 1079.75998 | 271.037872 | 6.11695E-06 | 0.006604835 |
| 1079.79998 | 281.284814 | 6.34821E-06 | 0.006854793 |
| 1079.83998 | 283.192112 | 6.39125E-06 | 0.006901529 |
| 1079.87998 | 264.259025 | 5.96396E-06 | 0.006440359 |
| 1079.91998 | 241.817834 | 5.45749E-06 | 0.005893654 |
| 1079.95998 | 238.896607 | 5.39156E-06 | 0.005822673 |
| 1079.99998 | 273.616242 | 6.17514E-06 | 0.006669148 |
| 1080.03998 | 308.527408 | 6.96303E-06 | 0.007520355 |
| 1080.07998 | 358.338396 | 8.0872E-06  | 0.008734821 |
| 1080.11998 | 413.039984 | 9.32174E-06 | 0.010068595 |
| 1080.15998 | 470.699685 | 1.0623E-05  | 0.011474579 |
| 1080.19998 | 531.405672 | 1.19931E-05 | 0.012954931 |
| 1080.23998 | 566.447361 | 1.27839E-05 | 0.01380971  |
| 1080.27998 | 543.096367 | 1.22569E-05 | 0.013240915 |
| 1080.31998 | 497.67324  | 1.12318E-05 | 0.012133929 |
| 1080.35998 | 417.275803 | 9.41733E-06 | 0.01017411  |
| 1080.39998 | 331.667398 | 7.48527E-06 | 0.008087087 |
| 1080.43998 | 285.382531 | 6.44069E-06 | 0.006958775 |
| 1080.47998 | 267.698984 | 6.04159E-06 | 0.00652782  |
| 1080.51998 | 269.084758 | 6.07287E-06 | 0.006561855 |
| 1080.55998 | 272.407365 | 6.14785E-06 | 0.006643126 |
| 1080.59998 | 266.33499  | 6.01081E-06 | 0.006495281 |
| 1080.63998 | 279.048848 | 6.29774E-06 | 0.006805594 |
| 1080.67998 | 306.26307  | 6.91193E-06 | 0.007469585 |
| 1080.71998 | 301.829011 | 6.81186E-06 | 0.007361714 |
| 1080.75998 | 277.752493 | 6.26849E-06 | 0.00677473  |
| 1080.79998 | 262.360423 | 5.92111E-06 | 0.006399535 |
| 1080.83998 | 279.332411 | 6.30414E-06 | 0.00681377  |
| 1080.87998 | 299.119925 | 6.75072E-06 | 0.007296718 |
| 1080.91998 | 315.151674 | 7.11253E-06 | 0.00768808  |
| 1080.95998 | 309.119933 | 6.97641E-06 | 0.007541216 |
| 1080.99998 | 346.062055 | 7.81014E-06 | 0.00844276  |
| 1081.03998 | 410.997904 | 9.27565E-06 | 0.010027349 |

|            |            |             |             |
|------------|------------|-------------|-------------|
| 1081.07998 | 452.588588 | 1.02143E-05 | 0.011042469 |
| 1081.11998 | 516.471132 | 1.1656E-05  | 0.012601571 |
| 1081.15998 | 601.956786 | 1.35853E-05 | 0.014687911 |
| 1081.19998 | 642.672716 | 1.45042E-05 | 0.015681971 |
| 1081.23998 | 639.457786 | 1.44317E-05 | 0.0156041   |
| 1081.27998 | 604.980098 | 1.36536E-05 | 0.014763319 |
| 1081.31998 | 526.723685 | 1.18874E-05 | 0.012854105 |
| 1081.35998 | 461.72358  | 1.04205E-05 | 0.011268266 |
| 1081.39998 | 393.998208 | 8.89199E-06 | 0.009615799 |
| 1081.43998 | 335.768794 | 7.57783E-06 | 0.008194973 |
| 1081.47998 | 318.09941  | 7.17906E-06 | 0.00776401  |
| 1081.51998 | 303.317051 | 6.84544E-06 | 0.007403484 |
| 1081.55998 | 294.279341 | 6.64147E-06 | 0.007183153 |
| 1081.59998 | 293.82012  | 6.63111E-06 | 0.007172209 |
| 1081.63998 | 279.445862 | 6.3067E-06  | 0.006821583 |
| 1081.67998 | 265.749648 | 5.9976E-06  | 0.006487483 |
| 1081.71998 | 255.807217 | 5.77321E-06 | 0.006244999 |
| 1081.75998 | 257.328221 | 5.80754E-06 | 0.006282364 |
| 1081.79998 | 265.377561 | 5.9892E-06  | 0.006479119 |
| 1081.83998 | 270.906317 | 6.11398E-06 | 0.006614346 |
| 1081.87998 | 257.955276 | 5.82169E-06 | 0.006298371 |
| 1081.91998 | 238.753832 | 5.38834E-06 | 0.005829754 |
| 1081.95998 | 236.435201 | 5.33601E-06 | 0.005773353 |
| 1081.99998 | 282.452133 | 6.37455E-06 | 0.006897264 |
| 1082.03998 | 348.381661 | 7.86249E-06 | 0.008507527 |
| 1082.07998 | 411.90213  | 9.29606E-06 | 0.010059078 |
| 1082.11998 | 461.138632 | 1.04073E-05 | 0.0112619   |
| 1082.15998 | 513.533001 | 1.15897E-05 | 0.012541936 |
| 1082.19998 | 579.374471 | 1.30757E-05 | 0.014150495 |
| 1082.23998 | 551.196404 | 1.24397E-05 | 0.013462779 |
| 1082.27998 | 515.53405  | 1.16349E-05 | 0.012592204 |
| 1082.31998 | 496.429825 | 1.12037E-05 | 0.01212602  |
| 1082.35998 | 445.25014  | 1.00487E-05 | 0.010876284 |
| 1082.39998 | 363.327796 | 8.1998E-06  | 0.008875466 |
| 1082.43998 | 301.821019 | 6.81168E-06 | 0.007373235 |
| 1082.47998 | 276.158046 | 6.2325E-06  | 0.006746559 |
| 1082.51998 | 254.431599 | 5.74217E-06 | 0.00621601  |
| 1082.55998 | 259.007955 | 5.84545E-06 | 0.006328049 |
| 1082.59998 | 285.791471 | 6.44992E-06 | 0.006982678 |
| 1082.63998 | 310.203588 | 7.00086E-06 | 0.007579414 |
| 1082.67998 | 339.135661 | 7.65382E-06 | 0.008286637 |
| 1082.71998 | 329.494986 | 7.43624E-06 | 0.008051369 |
| 1082.75998 | 319.752062 | 7.21636E-06 | 0.007813584 |
| 1082.79998 | 319.534955 | 7.21146E-06 | 0.007808568 |
| 1082.83998 | 304.362487 | 6.86904E-06 | 0.007438068 |
| 1082.87998 | 282.818458 | 6.38282E-06 | 0.006911827 |

|            |            |             |             |
|------------|------------|-------------|-------------|
| 1082.91998 | 291.347493 | 6.57531E-06 | 0.007120531 |
| 1082.95998 | 319.893054 | 7.21954E-06 | 0.007818474 |
| 1082.99998 | 336.504007 | 7.59443E-06 | 0.008224764 |
| 1083.03998 | 363.979157 | 8.2145E-06  | 0.008896635 |
| 1083.07998 | 401.835994 | 9.06888E-06 | 0.009822321 |
| 1083.11998 | 468.454741 | 1.05724E-05 | 0.011451146 |
| 1083.15998 | 589.123948 | 1.32957E-05 | 0.014401378 |
| 1083.19998 | 666.425007 | 1.50403E-05 | 0.016291635 |
| 1083.23998 | 683.655907 | 1.54292E-05 | 0.016713485 |
| 1083.27998 | 644.778494 | 1.45518E-05 | 0.015763622 |
| 1083.31998 | 561.192765 | 1.26653E-05 | 0.013720615 |
| 1083.35998 | 468.854092 | 1.05814E-05 | 0.011463448 |
| 1083.39998 | 400.094078 | 9.02957E-06 | 0.009782632 |
| 1083.43998 | 353.829018 | 7.98543E-06 | 0.008651732 |
| 1083.47998 | 304.605666 | 6.87453E-06 | 0.007448411 |
| 1083.51998 | 254.188842 | 5.73669E-06 | 0.006215816 |
| 1083.55998 | 232.870794 | 5.25557E-06 | 0.005694725 |
| 1083.59998 | 229.662626 | 5.18317E-06 | 0.005616478 |
| 1083.63998 | 247.290622 | 5.581E-06   | 0.0060478   |
| 1083.67998 | 306.372207 | 6.91439E-06 | 0.00749299  |
| 1083.71998 | 334.577142 | 7.55094E-06 | 0.008183105 |
| 1083.75998 | 339.872328 | 7.67045E-06 | 0.008312921 |
| 1083.79998 | 315.70717  | 7.12507E-06 | 0.007722152 |
| 1083.83998 | 276.90247  | 6.2493E-06  | 0.006773244 |
| 1083.87998 | 253.30698  | 5.71679E-06 | 0.00619631  |
| 1083.91998 | 246.153932 | 5.55535E-06 | 0.006021556 |
| 1083.95998 | 257.29366  | 5.80676E-06 | 0.006294295 |
| 1083.99998 | 273.356772 | 6.16928E-06 | 0.006687501 |
| 1084.03998 | 306.822263 | 6.92455E-06 | 0.00750649  |
| 1084.07998 | 369.238583 | 8.3332E-06  | 0.009033856 |
| 1084.11998 | 458.929811 | 1.03574E-05 | 0.011228671 |
| 1084.15998 | 521.106234 | 1.17606E-05 | 0.012750417 |
| 1084.19998 | 560.482004 | 1.26493E-05 | 0.013714369 |
| 1084.23998 | 597.284249 | 1.34799E-05 | 0.014615418 |
| 1084.27998 | 545.875766 | 1.23197E-05 | 0.013357956 |
| 1084.31998 | 465.794135 | 1.05123E-05 | 0.011398724 |
| 1084.35998 | 411.286476 | 9.28216E-06 | 0.010065206 |
| 1084.39998 | 349.710843 | 7.89249E-06 | 0.008558612 |
| 1084.43998 | 275.058664 | 6.20769E-06 | 0.006731868 |
| 1084.47998 | 229.88207  | 5.18812E-06 | 0.00562641  |
| 1084.51998 | 231.235201 | 5.21866E-06 | 0.005659737 |
| 1084.55998 | 234.956716 | 5.30265E-06 | 0.005751037 |
| 1084.59998 | 255.797576 | 5.77299E-06 | 0.00626139  |
| 1084.63998 | 303.047457 | 6.83936E-06 | 0.007418242 |
| 1084.67998 | 352.164207 | 7.94786E-06 | 0.00862088  |
| 1084.71998 | 343.0116   | 7.74129E-06 | 0.008397136 |

|            |            |             |             |
|------------|------------|-------------|-------------|
| 1084.75998 | 343.819626 | 7.75953E-06 | 0.008417228 |
| 1084.79998 | 313.872238 | 7.08366E-06 | 0.007684353 |
| 1084.83998 | 286.007302 | 6.45479E-06 | 0.00700241  |
| 1084.87998 | 270.891348 | 6.11364E-06 | 0.006632566 |
| 1084.91998 | 281.619382 | 6.35576E-06 | 0.006895488 |
| 1084.95998 | 322.638152 | 7.28149E-06 | 0.007900129 |
| 1084.99998 | 361.022214 | 8.14777E-06 | 0.008840329 |
| 1085.03998 | 390.283708 | 8.80816E-06 | 0.009557205 |
| 1085.07998 | 445.216436 | 1.00479E-05 | 0.010902791 |
| 1085.11998 | 532.737302 | 1.20231E-05 | 0.013046548 |
| 1085.15998 | 617.70921  | 1.39408E-05 | 0.015128038 |
| 1085.19998 | 638.439267 | 1.44087E-05 | 0.015636305 |
| 1085.23998 | 639.238779 | 1.44267E-05 | 0.015656463 |
| 1085.27998 | 622.318893 | 1.40449E-05 | 0.015242617 |
| 1085.31998 | 561.634723 | 1.26753E-05 | 0.013756771 |
| 1085.35998 | 478.207093 | 1.07925E-05 | 0.011713713 |
| 1085.39998 | 380.466272 | 8.58659E-06 | 0.009319889 |
| 1085.43998 | 326.140995 | 7.36055E-06 | 0.007989433 |
| 1085.47998 | 297.596926 | 6.71635E-06 | 0.007290461 |
| 1085.51998 | 283.907708 | 6.4074E-06  | 0.006955362 |
| 1085.55998 | 271.802076 | 6.13419E-06 | 0.006659036 |
| 1085.59998 | 286.719678 | 6.47086E-06 | 0.00702477  |
| 1085.63998 | 311.7325   | 7.03537E-06 | 0.007637877 |
| 1085.67998 | 303.808095 | 6.85653E-06 | 0.007443993 |
| 1085.71998 | 296.682083 | 6.6957E-06  | 0.007269657 |
| 1085.75998 | 305.189999 | 6.88771E-06 | 0.007478403 |
| 1085.79998 | 304.39733  | 6.86982E-06 | 0.007459254 |
| 1085.83998 | 286.56896  | 6.46746E-06 | 0.007022629 |
| 1085.87998 | 266.855742 | 6.02256E-06 | 0.00653978  |
| 1085.91998 | 253.368959 | 5.71818E-06 | 0.006209491 |
| 1085.95998 | 271.262577 | 6.12202E-06 | 0.006648267 |
| 1085.99998 | 286.632089 | 6.46889E-06 | 0.007025211 |
| 1086.03998 | 316.027457 | 7.1323E-06  | 0.007745962 |
| 1086.07998 | 362.038305 | 8.1707E-06  | 0.008874034 |
| 1086.11998 | 419.907613 | 9.47673E-06 | 0.010292866 |
| 1086.15998 | 515.719609 | 1.16391E-05 | 0.012641896 |
| 1086.19998 | 588.476504 | 1.32811E-05 | 0.014425925 |
| 1086.23998 | 609.056943 | 1.37456E-05 | 0.014930984 |
| 1086.27998 | 582.736209 | 1.31515E-05 | 0.01428626  |
| 1086.31998 | 550.466736 | 1.24233E-05 | 0.013495644 |
| 1086.35998 | 504.236667 | 1.13799E-05 | 0.012362689 |
| 1086.39998 | 442.258994 | 9.98117E-06 | 0.010843542 |
| 1086.43998 | 380.870001 | 8.59571E-06 | 0.009338718 |
| 1086.47998 | 327.555716 | 7.39248E-06 | 0.008031777 |
| 1086.51998 | 317.024011 | 7.15479E-06 | 0.007773823 |
| 1086.55998 | 308.865575 | 6.97067E-06 | 0.007574047 |

|            |            |             |             |
|------------|------------|-------------|-------------|
| 1086.59998 | 312.574321 | 7.05437E-06 | 0.007665275 |
| 1086.63998 | 340.842085 | 7.69233E-06 | 0.008358795 |
| 1086.67998 | 358.233374 | 8.08483E-06 | 0.008785621 |
| 1086.71998 | 377.216841 | 8.51326E-06 | 0.009251528 |
| 1086.75998 | 401.580519 | 9.06311E-06 | 0.009849428 |
| 1086.79998 | 392.458501 | 8.85724E-06 | 0.00962605  |
| 1086.83998 | 375.928018 | 8.48417E-06 | 0.009220937 |
| 1086.87998 | 389.756184 | 8.79625E-06 | 0.009560473 |
| 1086.91998 | 425.05255  | 9.59284E-06 | 0.010426654 |
| 1086.95998 | 434.759467 | 9.81192E-06 | 0.01066516  |
| 1086.99998 | 445.897921 | 1.00633E-05 | 0.010938801 |
| 1087.03998 | 493.131828 | 1.11293E-05 | 0.012097992 |
| 1087.07998 | 568.342211 | 1.28267E-05 | 0.01394364  |
| 1087.11998 | 628.220674 | 1.41781E-05 | 0.015413258 |
| 1087.15998 | 671.334614 | 1.51511E-05 | 0.016471656 |
| 1087.19998 | 742.835518 | 1.67648E-05 | 0.01822665  |
| 1087.23998 | 762.009938 | 1.71975E-05 | 0.018697813 |
| 1087.27998 | 736.583602 | 1.66237E-05 | 0.018074579 |
| 1087.31998 | 658.15033  | 1.48535E-05 | 0.016150547 |
| 1087.35998 | 533.489836 | 1.20401E-05 | 0.013091947 |
| 1087.39998 | 424.580599 | 9.58219E-06 | 0.010419676 |
| 1087.43998 | 353.267481 | 7.97275E-06 | 0.008669893 |
| 1087.47998 | 312.553597 | 7.0539E-06  | 0.007670974 |
| 1087.51998 | 295.274489 | 6.66393E-06 | 0.007247161 |
| 1087.55998 | 305.221794 | 6.88843E-06 | 0.007491582 |
| 1087.59998 | 315.483792 | 7.12003E-06 | 0.007743744 |
| 1087.63998 | 302.141497 | 6.81891E-06 | 0.007416522 |
| 1087.67998 | 287.984929 | 6.49942E-06 | 0.007069288 |
| 1087.71998 | 301.641192 | 6.80762E-06 | 0.007404786 |
| 1087.75998 | 321.471627 | 7.25517E-06 | 0.00789188  |
| 1087.79998 | 309.301123 | 6.9805E-06  | 0.007593383 |
| 1087.83998 | 294.991867 | 6.65756E-06 | 0.007242355 |
| 1087.87998 | 327.877397 | 7.39974E-06 | 0.008050025 |
| 1087.91998 | 352.70969  | 7.96017E-06 | 0.008660024 |
| 1087.95998 | 367.146786 | 8.28599E-06 | 0.009014827 |
| 1087.99998 | 390.56853  | 8.81459E-06 | 0.009590271 |
| 1088.03998 | 405.469054 | 9.15087E-06 | 0.009956514 |
| 1088.07998 | 434.749977 | 9.8117E-06  | 0.010675916 |
| 1088.11998 | 500.910199 | 1.13048E-05 | 0.012301028 |
| 1088.15998 | 575.698984 | 1.29927E-05 | 0.014138162 |
| 1088.19998 | 625.781588 | 1.4123E-05  | 0.015368669 |
| 1088.23998 | 636.958366 | 1.43753E-05 | 0.015643736 |
| 1088.27998 | 583.909508 | 1.3178E-05  | 0.01434138  |
| 1088.31998 | 514.675304 | 1.16155E-05 | 0.012641386 |
| 1088.35998 | 445.906793 | 1.00635E-05 | 0.010952705 |
| 1088.39998 | 378.518323 | 8.54263E-06 | 0.0092978   |

|            |            |             |             |
|------------|------------|-------------|-------------|
| 1088.43998 | 338.89947  | 7.64849E-06 | 0.008324921 |
| 1088.47998 | 300.661378 | 6.78551E-06 | 0.00738589  |
| 1088.51998 | 281.432509 | 6.35154E-06 | 0.006913778 |
| 1088.55998 | 279.820546 | 6.31516E-06 | 0.00687443  |
| 1088.59998 | 270.699311 | 6.10931E-06 | 0.006650591 |
| 1088.63998 | 269.825952 | 6.0896E-06  | 0.006629378 |
| 1088.67998 | 289.120122 | 6.52504E-06 | 0.007103679 |
| 1088.71998 | 316.028053 | 7.13231E-06 | 0.007765092 |
| 1088.75998 | 315.213562 | 7.11393E-06 | 0.007745363 |
| 1088.79998 | 332.938729 | 7.51396E-06 | 0.008181203 |
| 1088.83998 | 360.505113 | 8.1361E-06  | 0.008858909 |
| 1088.87998 | 366.397963 | 8.26909E-06 | 0.009004048 |
| 1088.91998 | 347.830476 | 7.85005E-06 | 0.008548076 |
| 1088.95998 | 349.317685 | 7.88361E-06 | 0.00858494  |
| 1088.99998 | 379.657184 | 8.56833E-06 | 0.009330915 |
| 1089.03998 | 437.809062 | 9.88074E-06 | 0.010760522 |
| 1089.07998 | 542.476938 | 1.22429E-05 | 0.013333551 |
| 1089.11998 | 620.349846 | 1.40004E-05 | 0.01524815  |
| 1089.15998 | 674.148931 | 1.52146E-05 | 0.016571136 |
| 1089.19998 | 704.814535 | 1.59067E-05 | 0.017325558 |
| 1089.23998 | 685.656459 | 1.54743E-05 | 0.016855238 |
| 1089.27998 | 653.327929 | 1.47447E-05 | 0.016061108 |
| 1089.31998 | 587.82042  | 1.32663E-05 | 0.014451233 |
| 1089.35998 | 498.874871 | 1.12589E-05 | 0.012265007 |
| 1089.39998 | 403.025034 | 9.09571E-06 | 0.00990887  |
| 1089.43998 | 326.665646 | 7.37239E-06 | 0.008031775 |
| 1089.47998 | 296.349829 | 6.6882E-06  | 0.007286663 |
| 1089.51998 | 295.047942 | 6.65882E-06 | 0.007254919 |
| 1089.55998 | 316.690335 | 7.14726E-06 | 0.007787368 |
| 1089.59998 | 318.556411 | 7.18937E-06 | 0.007833542 |
| 1089.63998 | 294.242872 | 6.64065E-06 | 0.00723592  |
| 1089.67998 | 285.078466 | 6.43382E-06 | 0.007010809 |
| 1089.71998 | 281.686774 | 6.35728E-06 | 0.006927653 |
| 1089.75998 | 264.330539 | 5.96557E-06 | 0.006501042 |
| 1089.79998 | 248.531069 | 5.609E-06   | 0.006112688 |
| 1089.83998 | 243.325226 | 5.49151E-06 | 0.005984869 |
| 1089.87998 | 268.273071 | 6.05455E-06 | 0.006598732 |
| 1089.91998 | 298.53636  | 6.73755E-06 | 0.00734339  |
| 1089.95998 | 305.857732 | 6.90278E-06 | 0.007523757 |
| 1089.99998 | 325.519638 | 7.34652E-06 | 0.008007712 |
| 1090.03998 | 369.896568 | 8.34805E-06 | 0.009099709 |
| 1090.07998 | 405.775126 | 9.15778E-06 | 0.009982712 |
| 1090.11998 | 428.724589 | 9.67572E-06 | 0.010547692 |
| 1090.15998 | 483.482715 | 1.09115E-05 | 0.011895315 |
| 1090.19998 | 513.636963 | 1.15921E-05 | 0.012637675 |
| 1090.23998 | 538.99334  | 1.21643E-05 | 0.013262038 |



|            |            |             |             |
|------------|------------|-------------|-------------|
| 1090.27998 | 540.67837  | 1.22024E-05 | 0.013303986 |
| 1090.31998 | 517.148473 | 1.16713E-05 | 0.012725474 |
| 1090.35998 | 469.15247  | 1.05881E-05 | 0.01154486  |
| 1090.39998 | 397.381567 | 8.96835E-06 | 0.009779087 |
| 1090.43998 | 342.9267   | 7.73938E-06 | 0.008439327 |
| 1090.47998 | 288.919378 | 6.52051E-06 | 0.007110483 |
| 1090.51998 | 249.536081 | 5.63168E-06 | 0.006141461 |
| 1090.55998 | 271.680222 | 6.13144E-06 | 0.006686708 |
| 1090.59998 | 308.668858 | 6.96623E-06 | 0.007597366 |
| 1090.63998 | 311.930456 | 7.03984E-06 | 0.007677926 |
| 1090.67998 | 313.056984 | 7.06526E-06 | 0.007705938 |
| 1090.71998 | 300.214147 | 6.77542E-06 | 0.007390081 |
| 1090.75998 | 289.955816 | 6.5439E-06  | 0.007137823 |
| 1090.79998 | 291.652059 | 6.58218E-06 | 0.007179843 |
| 1090.83998 | 281.037651 | 6.34263E-06 | 0.006918793 |
| 1090.87998 | 275.411627 | 6.21566E-06 | 0.006780536 |
| 1090.91998 | 269.54876  | 6.08334E-06 | 0.006636437 |
| 1090.95998 | 298.758    | 6.74255E-06 | 0.007355854 |
| 1090.99998 | 343.680619 | 7.75639E-06 | 0.008462224 |
| 1091.03998 | 383.822659 | 8.66234E-06 | 0.009450962 |
| 1091.07998 | 416.36043  | 9.39667E-06 | 0.010252524 |
| 1091.11998 | 475.672466 | 1.07353E-05 | 0.011713462 |
| 1091.15998 | 535.502269 | 1.20855E-05 | 0.013187258 |
| 1091.19998 | 585.30144  | 1.32094E-05 | 0.014414139 |
| 1091.23998 | 624.839468 | 1.41018E-05 | 0.0153884   |
| 1091.27998 | 627.427774 | 1.41602E-05 | 0.015452711 |
| 1091.31998 | 546.692137 | 1.23381E-05 | 0.013464793 |
| 1091.35998 | 449.31423  | 1.01404E-05 | 0.011066823 |
| 1091.39998 | 380.902166 | 8.59643E-06 | 0.009382145 |
| 1091.43998 | 330.417248 | 7.45706E-06 | 0.00813893  |
| 1091.47998 | 286.759132 | 6.47175E-06 | 0.00706379  |
| 1091.51998 | 240.690089 | 5.43204E-06 | 0.00592918  |
| 1091.55998 | 239.599263 | 5.40742E-06 | 0.005902525 |
| 1091.59998 | 272.988114 | 6.16096E-06 | 0.006725305 |
| 1091.63998 | 282.145963 | 6.36764E-06 | 0.006951172 |
| 1091.67998 | 304.870333 | 6.8805E-06  | 0.007511303 |
| 1091.71998 | 329.123849 | 7.42787E-06 | 0.008109151 |
| 1091.75998 | 324.19894  | 7.31672E-06 | 0.0079881   |
| 1091.79998 | 300.298605 | 6.77732E-06 | 0.007399479 |
| 1091.83998 | 274.228823 | 6.18896E-06 | 0.006757357 |
| 1091.87998 | 262.249688 | 5.91861E-06 | 0.006462412 |
| 1091.91998 | 271.915731 | 6.13676E-06 | 0.00670085  |
| 1091.95998 | 255.468735 | 5.76557E-06 | 0.006295776 |
| 1091.99998 | 253.408076 | 5.71907E-06 | 0.006245221 |
| 1092.03998 | 275.953835 | 6.22789E-06 | 0.006801109 |
| 1092.07998 | 303.795729 | 6.85625E-06 | 0.007487569 |

|            |            |             |             |
|------------|------------|-------------|-------------|
| 1092.11998 | 342.843655 | 7.7375E-06  | 0.008450282 |
| 1092.15998 | 389.978834 | 8.80128E-06 | 0.009612405 |
| 1092.19998 | 464.318511 | 1.0479E-05  | 0.011445188 |
| 1092.23998 | 496.33872  | 1.12017E-05 | 0.012234916 |
| 1092.27998 | 472.082015 | 1.06542E-05 | 0.011637406 |
| 1092.31998 | 464.089826 | 1.04739E-05 | 0.011440808 |
| 1092.35998 | 451.343466 | 1.01862E-05 | 0.01112699  |
| 1092.39998 | 400.489912 | 9.0385E-06  | 0.009873657 |
| 1092.43998 | 339.631815 | 7.66502E-06 | 0.008373571 |
| 1092.47998 | 287.5397   | 6.48937E-06 | 0.007089507 |
| 1092.51998 | 274.757731 | 6.2009E-06  | 0.006774606 |
| 1092.55998 | 279.924197 | 6.3175E-06  | 0.006902247 |
| 1092.59998 | 280.643881 | 6.33374E-06 | 0.006920246 |
| 1092.63998 | 293.56085  | 6.62526E-06 | 0.007239023 |
| 1092.67998 | 322.978214 | 7.28917E-06 | 0.007964728 |
| 1092.71998 | 325.762844 | 7.35201E-06 | 0.008033692 |
| 1092.75998 | 285.655136 | 6.44684E-06 | 0.007044847 |
| 1092.79998 | 236.091411 | 5.32825E-06 | 0.005822716 |
| 1092.83998 | 231.727951 | 5.22978E-06 | 0.005715309 |
| 1092.87998 | 229.60239  | 5.18181E-06 | 0.005663092 |
| 1092.91998 | 245.057668 | 5.53061E-06 | 0.006044514 |
| 1092.95998 | 296.103847 | 6.68265E-06 | 0.007303871 |
| 1092.99998 | 358.228763 | 8.08472E-06 | 0.008836603 |
| 1093.03998 | 379.331969 | 8.56099E-06 | 0.009357509 |
| 1093.07998 | 383.363933 | 8.65199E-06 | 0.009457317 |
| 1093.11998 | 429.154026 | 9.68541E-06 | 0.010587314 |
| 1093.15998 | 482.694916 | 1.08938E-05 | 0.011908614 |
| 1093.19998 | 501.229459 | 1.13121E-05 | 0.012366334 |
| 1093.23998 | 538.909407 | 1.21624E-05 | 0.01329646  |
| 1093.27998 | 564.889108 | 1.27488E-05 | 0.013937964 |
| 1093.31998 | 526.408454 | 1.18803E-05 | 0.012988975 |
| 1093.35998 | 460.677641 | 1.03969E-05 | 0.011367503 |
| 1093.39998 | 385.283277 | 8.69531E-06 | 0.009507448 |
| 1093.43998 | 329.742721 | 7.44183E-06 | 0.008137199 |
| 1093.47998 | 290.573746 | 6.55784E-06 | 0.007170872 |
| 1093.51998 | 265.343168 | 5.98843E-06 | 0.006548463 |
| 1093.55998 | 244.338263 | 5.51437E-06 | 0.006030299 |
| 1093.59998 | 241.759125 | 5.45617E-06 | 0.005966864 |
| 1093.63998 | 269.339934 | 6.07863E-06 | 0.00664783  |
| 1093.67998 | 272.033021 | 6.13941E-06 | 0.006714546 |
| 1093.71998 | 257.628381 | 5.81431E-06 | 0.006359231 |
| 1093.75998 | 277.140191 | 6.25467E-06 | 0.006841106 |
| 1093.79998 | 285.723273 | 6.44838E-06 | 0.007053234 |
| 1093.83998 | 263.011342 | 5.9358E-06  | 0.006492815 |
| 1093.87998 | 234.688236 | 5.29659E-06 | 0.00579383  |
| 1093.91998 | 228.108343 | 5.14809E-06 | 0.005631596 |

|            |            |             |             |
|------------|------------|-------------|-------------|
| 1093.95998 | 255.564352 | 5.76773E-06 | 0.006309667 |
| 1093.99998 | 284.278795 | 6.41578E-06 | 0.007018859 |
| 1094.03998 | 310.808691 | 7.01452E-06 | 0.007674164 |
| 1094.07998 | 361.730706 | 8.16376E-06 | 0.008931804 |
| 1094.11998 | 414.67125  | 9.35855E-06 | 0.010239379 |
| 1094.15998 | 463.988271 | 1.04716E-05 | 0.011457572 |
| 1094.19998 | 497.922865 | 1.12374E-05 | 0.012295991 |
| 1094.23998 | 486.282498 | 1.09747E-05 | 0.012008976 |
| 1094.27998 | 478.473668 | 1.07985E-05 | 0.011816565 |
| 1094.31998 | 439.627959 | 9.92179E-06 | 0.010857614 |
| 1094.35998 | 417.812771 | 9.42945E-06 | 0.010319215 |
| 1094.39998 | 365.441985 | 8.24752E-06 | 0.009026082 |
| 1094.43998 | 294.558967 | 6.64779E-06 | 0.007275602 |
| 1094.47998 | 262.334638 | 5.92053E-06 | 0.006479899 |
| 1094.51998 | 277.251165 | 6.25717E-06 | 0.0068486   |
| 1094.55998 | 272.349702 | 6.14655E-06 | 0.006727771 |
| 1094.59998 | 241.279635 | 5.44535E-06 | 0.005960475 |
| 1094.63998 | 245.188029 | 5.53355E-06 | 0.006057248 |
| 1094.67998 | 264.05331  | 5.95932E-06 | 0.006523543 |
| 1094.71998 | 277.218376 | 6.25643E-06 | 0.006849042 |
| 1094.75998 | 290.721343 | 6.56118E-06 | 0.007182913 |
| 1094.79998 | 292.99976  | 6.6126E-06  | 0.00723947  |
| 1094.83998 | 286.336282 | 6.46221E-06 | 0.007075087 |
| 1094.87998 | 298.424587 | 6.73503E-06 | 0.007374047 |
| 1094.91998 | 318.014946 | 7.17715E-06 | 0.00785841  |
| 1094.95998 | 350.283848 | 7.90542E-06 | 0.008656117 |
| 1094.99998 | 363.610253 | 8.20618E-06 | 0.008985764 |
| 1095.03998 | 338.491494 | 7.63928E-06 | 0.008365319 |
| 1095.07998 | 377.223776 | 8.51342E-06 | 0.009322871 |
| 1095.11998 | 459.377155 | 1.03675E-05 | 0.011353659 |
| 1095.15998 | 506.212507 | 1.14245E-05 | 0.012511667 |
| 1095.19998 | 533.334351 | 1.20366E-05 | 0.013182499 |
| 1095.23998 | 562.673743 | 1.26988E-05 | 0.013908193 |
| 1095.27998 | 556.426592 | 1.25578E-05 | 0.013754278 |
| 1095.31998 | 473.435658 | 1.06848E-05 | 0.011703257 |
| 1095.35998 | 429.357307 | 9.69E-06    | 0.010614034 |
| 1095.39998 | 385.940362 | 8.71014E-06 | 0.009541083 |
| 1095.43998 | 348.010747 | 7.85412E-06 | 0.008603715 |
| 1095.47998 | 322.933073 | 7.28815E-06 | 0.007984022 |
| 1095.51998 | 284.258096 | 6.41531E-06 | 0.0070281   |
| 1095.55998 | 262.674352 | 5.92819E-06 | 0.006494692 |
| 1095.59998 | 267.508615 | 6.0373E-06  | 0.006614462 |
| 1095.63998 | 271.583873 | 6.12927E-06 | 0.006715473 |
| 1095.67998 | 259.371066 | 5.85364E-06 | 0.00641372  |
| 1095.71998 | 258.657776 | 5.83755E-06 | 0.006396315 |
| 1095.75998 | 267.777768 | 6.04337E-06 | 0.006622084 |

|            |            |             |             |
|------------|------------|-------------|-------------|
| 1095.79998 | 256.81548  | 5.79597E-06 | 0.006351221 |
| 1095.83998 | 242.172863 | 5.4655E-06  | 0.005989318 |
| 1095.87998 | 232.849958 | 5.2551E-06  | 0.005758958 |
| 1095.91998 | 233.300575 | 5.26527E-06 | 0.005770314 |
| 1095.95998 | 229.208936 | 5.17293E-06 | 0.00566932  |
| 1095.99998 | 238.955053 | 5.39288E-06 | 0.005910599 |
| 1096.03998 | 300.588223 | 6.78386E-06 | 0.007435379 |
| 1096.07998 | 375.744965 | 8.48004E-06 | 0.009294803 |
| 1096.11998 | 416.269058 | 9.39461E-06 | 0.010297623 |
| 1096.15998 | 456.876474 | 1.03111E-05 | 0.011302578 |
| 1096.19998 | 495.053995 | 1.11727E-05 | 0.012247491 |
| 1096.23998 | 490.996312 | 1.10811E-05 | 0.012147548 |
| 1096.27998 | 464.462508 | 1.04823E-05 | 0.011491505 |
| 1096.31998 | 422.989286 | 9.54628E-06 | 0.010465776 |
| 1096.35998 | 393.765535 | 8.88674E-06 | 0.009743066 |
| 1096.39998 | 362.573355 | 8.18278E-06 | 0.008971595 |
| 1096.43998 | 316.078762 | 7.13346E-06 | 0.007821408 |
| 1096.47998 | 269.242754 | 6.07643E-06 | 0.006662688 |
| 1096.51998 | 243.848109 | 5.50331E-06 | 0.006034492 |
| 1096.55998 | 220.183881 | 4.96924E-06 | 0.005449074 |
| 1096.59998 | 225.803268 | 5.09607E-06 | 0.005588345 |
| 1096.63998 | 246.094572 | 5.55401E-06 | 0.006090751 |
| 1096.67998 | 238.718797 | 5.38755E-06 | 0.005908419 |
| 1096.71998 | 216.366894 | 4.8831E-06  | 0.005355393 |
| 1096.75998 | 214.916808 | 4.85037E-06 | 0.005319695 |
| 1096.79998 | 227.612905 | 5.13691E-06 | 0.005634159 |
| 1096.83998 | 255.23831  | 5.76037E-06 | 0.006318208 |
| 1096.87998 | 265.858681 | 6.00006E-06 | 0.006581346 |
| 1096.91998 | 275.649804 | 6.22103E-06 | 0.006823974 |
| 1096.95998 | 303.56711  | 6.85109E-06 | 0.007515368 |
| 1096.99998 | 342.880667 | 7.73834E-06 | 0.008488958 |
| 1097.03998 | 372.791593 | 8.41339E-06 | 0.009229822 |
| 1097.07998 | 389.999853 | 8.80175E-06 | 0.009656228 |
| 1097.11998 | 454.751431 | 1.02631E-05 | 0.011259859 |
| 1097.15998 | 551.309224 | 1.24423E-05 | 0.013651173 |
| 1097.19998 | 586.594733 | 1.32386E-05 | 0.01452542  |
| 1097.23998 | 585.935371 | 1.32237E-05 | 0.014509622 |
| 1097.27998 | 562.54307  | 1.26958E-05 | 0.013930862 |
| 1097.31998 | 511.022848 | 1.15331E-05 | 0.012655472 |
| 1097.35998 | 463.80764  | 1.04675E-05 | 0.011486607 |
| 1097.39998 | 401.998614 | 9.07255E-06 | 0.009956215 |
| 1097.43998 | 315.869688 | 7.12874E-06 | 0.007823363 |
| 1097.47998 | 262.784164 | 5.93067E-06 | 0.006508794 |
| 1097.51998 | 270.485668 | 6.10448E-06 | 0.006699794 |
| 1097.55998 | 280.129116 | 6.32212E-06 | 0.00693891  |
| 1097.59998 | 285.252182 | 6.43774E-06 | 0.007066068 |

|            |            |             |             |
|------------|------------|-------------|-------------|
| 1097.63998 | 293.973145 | 6.63456E-06 | 0.007282363 |
| 1097.67998 | 288.924251 | 6.52062E-06 | 0.007157552 |
| 1097.71998 | 265.627114 | 5.99483E-06 | 0.006580649 |
| 1097.75998 | 248.2658   | 5.60301E-06 | 0.006150764 |
| 1097.79998 | 242.548626 | 5.47398E-06 | 0.00600934  |
| 1097.83998 | 261.923093 | 5.91124E-06 | 0.006489595 |
| 1097.87998 | 278.617482 | 6.28801E-06 | 0.006903479 |
| 1097.91998 | 284.268596 | 6.41555E-06 | 0.007043756 |
| 1097.95998 | 276.9955   | 6.2514E-06  | 0.00686379  |
| 1097.99998 | 286.211426 | 6.45939E-06 | 0.007092414 |
| 1098.03998 | 321.11164  | 7.24704E-06 | 0.007957542 |
| 1098.07998 | 368.243441 | 8.31074E-06 | 0.009125859 |
| 1098.11998 | 429.585058 | 9.69514E-06 | 0.010646423 |
| 1098.15998 | 464.998641 | 1.04944E-05 | 0.011524499 |
| 1098.19998 | 488.728134 | 1.10299E-05 | 0.012113051 |
| 1098.23998 | 513.048161 | 1.15788E-05 | 0.012716282 |
| 1098.27998 | 495.178069 | 1.11755E-05 | 0.012273805 |
| 1098.31998 | 477.429918 | 1.07749E-05 | 0.011834319 |
| 1098.35998 | 447.60083  | 1.01017E-05 | 0.011095333 |
| 1098.39998 | 406.311718 | 9.16989E-06 | 0.010072206 |
| 1098.43998 | 358.932506 | 8.10061E-06 | 0.00889803  |
| 1098.47998 | 326.478463 | 7.36816E-06 | 0.008093781 |
| 1098.51998 | 304.803539 | 6.87899E-06 | 0.007556709 |
| 1098.55998 | 291.925859 | 6.58836E-06 | 0.007237709 |
| 1098.59998 | 284.852431 | 6.42872E-06 | 0.007062595 |
| 1098.63998 | 293.069398 | 6.61417E-06 | 0.00726659  |
| 1098.67998 | 313.769964 | 7.08135E-06 | 0.007780139 |
| 1098.71998 | 325.558256 | 7.3474E-06  | 0.008072731 |
| 1098.75998 | 336.378747 | 7.5916E-06  | 0.008341346 |
| 1098.79998 | 346.722145 | 7.82504E-06 | 0.008598149 |
| 1098.83998 | 343.982841 | 7.76321E-06 | 0.008530529 |
| 1098.87998 | 315.198592 | 7.11359E-06 | 0.007816985 |
| 1098.91998 | 271.671562 | 6.13125E-06 | 0.006737752 |
| 1098.95998 | 262.969134 | 5.93485E-06 | 0.006522159 |
| 1098.99998 | 297.20448  | 6.70749E-06 | 0.007371533 |
| 1099.03998 | 331.743809 | 7.487E-06   | 0.008228508 |
| 1099.07998 | 404.526498 | 9.1296E-06  | 0.01003416  |
| 1099.11998 | 476.213919 | 1.07475E-05 | 0.011812775 |
| 1099.15998 | 525.230904 | 1.18537E-05 | 0.013029146 |
| 1099.19998 | 588.638373 | 1.32847E-05 | 0.014602595 |
| 1099.23998 | 619.336519 | 1.39776E-05 | 0.015364696 |
| 1099.27998 | 570.83861  | 1.2883E-05  | 0.01416206  |
| 1099.31998 | 483.374883 | 1.09091E-05 | 0.011992589 |
| 1099.35998 | 420.52798  | 9.49073E-06 | 0.01043373  |
| 1099.39998 | 376.467877 | 8.49636E-06 | 0.009340893 |
| 1099.43998 | 342.966887 | 7.74028E-06 | 0.008509979 |

|            |            |             |             |
|------------|------------|-------------|-------------|
| 1099.47998 | 326.200957 | 7.3619E-06  | 0.008094263 |
| 1099.51998 | 278.316507 | 6.28122E-06 | 0.006906322 |
| 1099.55998 | 239.367193 | 5.40218E-06 | 0.005940025 |
| 1099.59998 | 233.47309  | 5.26916E-06 | 0.005793971 |
| 1099.63998 | 228.611668 | 5.15945E-06 | 0.005673534 |
| 1099.67998 | 236.611552 | 5.33999E-06 | 0.005872284 |
| 1099.71998 | 250.863025 | 5.66163E-06 | 0.006226207 |
| 1099.75998 | 244.149531 | 5.51011E-06 | 0.006059804 |
| 1099.79998 | 232.549483 | 5.24832E-06 | 0.0057721   |
| 1099.83998 | 209.777053 | 4.73438E-06 | 0.005207056 |
| 1099.87998 | 211.1308   | 4.76493E-06 | 0.005240849 |
| 1099.91998 | 219.199696 | 4.94703E-06 | 0.005441339 |
| 1099.95998 | 235.47343  | 5.31431E-06 | 0.005845525 |
| 1099.99998 | 298.783478 | 6.74313E-06 | 0.007417439 |
| 1100.03998 | 337.440605 | 7.61556E-06 | 0.008377425 |
| 1100.07998 | 345.129141 | 7.78908E-06 | 0.008568615 |
| 1100.11998 | 394.883506 | 8.91197E-06 | 0.009804237 |
| 1100.15998 | 452.016777 | 1.02014E-05 | 0.01122316  |
| 1100.19998 | 478.047799 | 1.07889E-05 | 0.011869918 |
| 1100.23998 | 488.510156 | 1.1025E-05  | 0.012130139 |
| 1100.27998 | 467.3339   | 1.05471E-05 | 0.011604736 |
| 1100.31998 | 433.04583  | 9.77324E-06 | 0.010753693 |
| 1100.35998 | 385.389697 | 8.69771E-06 | 0.009570611 |
| 1100.39998 | 338.876891 | 7.64798E-06 | 0.008415836 |
| 1100.43998 | 306.682079 | 6.92139E-06 | 0.007616571 |
| 1100.47998 | 291.988861 | 6.58978E-06 | 0.007251923 |
| 1100.51998 | 283.851626 | 6.40614E-06 | 0.00705008  |
| 1100.55998 | 290.062618 | 6.54631E-06 | 0.007204606 |
| 1100.59998 | 293.017735 | 6.613E-06   | 0.00727827  |
| 1100.63998 | 285.252913 | 6.43776E-06 | 0.007085657 |
| 1100.67998 | 305.963093 | 6.90516E-06 | 0.007600372 |
| 1100.71998 | 330.356395 | 7.45568E-06 | 0.00820662  |
| 1100.75998 | 338.600337 | 7.64174E-06 | 0.008411719 |
| 1100.79998 | 338.349089 | 7.63607E-06 | 0.008405783 |
| 1100.83998 | 310.35701  | 7.00433E-06 | 0.007710641 |
| 1100.87998 | 281.194115 | 6.34616E-06 | 0.00698636  |
| 1100.91998 | 295.364708 | 6.66597E-06 | 0.0073387   |
| 1100.95998 | 330.538528 | 7.45979E-06 | 0.008212935 |
| 1100.99998 | 365.565435 | 8.2503E-06  | 0.009083583 |
| 1101.03998 | 405.515737 | 9.15193E-06 | 0.010076636 |
| 1101.07998 | 434.243471 | 9.80027E-06 | 0.010790881 |
| 1101.11998 | 503.140598 | 1.13552E-05 | 0.012503418 |
| 1101.15998 | 582.221539 | 1.31399E-05 | 0.014469164 |
| 1101.19998 | 612.981326 | 1.38341E-05 | 0.015234149 |
| 1101.23998 | 601.142094 | 1.35669E-05 | 0.014940456 |
| 1101.27998 | 552.807045 | 1.24761E-05 | 0.013739663 |

|            |            |             |             |
|------------|------------|-------------|-------------|
| 1101.31998 | 486.71045  | 1.09844E-05 | 0.012097314 |
| 1101.35998 | 436.968496 | 9.86177E-06 | 0.010861359 |
| 1101.39998 | 375.425173 | 8.47282E-06 | 0.009331967 |
| 1101.43998 | 316.515585 | 7.14332E-06 | 0.007867934 |
| 1101.47998 | 282.555078 | 6.37687E-06 | 0.007024    |
| 1101.51998 | 246.205256 | 5.55651E-06 | 0.006120606 |
| 1101.55998 | 247.456121 | 5.58474E-06 | 0.006151926 |
| 1101.59998 | 263.868377 | 5.95514E-06 | 0.006560184 |
| 1101.63998 | 283.595765 | 6.40036E-06 | 0.007050894 |
| 1101.67998 | 304.503266 | 6.87221E-06 | 0.007570981 |
| 1101.71998 | 297.823355 | 6.72146E-06 | 0.007405165 |
| 1101.75998 | 291.906668 | 6.58793E-06 | 0.007258314 |
| 1101.79998 | 307.703935 | 6.94445E-06 | 0.007651394 |
| 1101.83998 | 307.219777 | 6.93352E-06 | 0.007639632 |
| 1101.87998 | 311.074511 | 7.02052E-06 | 0.007735769 |
| 1101.91998 | 309.64352  | 6.98822E-06 | 0.007700462 |
| 1101.95998 | 308.384044 | 6.9598E-06  | 0.007669419 |
| 1101.99998 | 313.671956 | 7.07914E-06 | 0.007801211 |
| 1102.03998 | 338.384956 | 7.63688E-06 | 0.008416144 |
| 1102.07998 | 388.558884 | 8.76923E-06 | 0.009664396 |
| 1102.11998 | 457.50756  | 1.03253E-05 | 0.011379729 |
| 1102.15998 | 528.737249 | 1.19329E-05 | 0.013151924 |
| 1102.19998 | 580.608121 | 1.31035E-05 | 0.014442696 |
| 1102.23998 | 579.693743 | 1.30829E-05 | 0.014420474 |
| 1102.27998 | 574.62741  | 1.29685E-05 | 0.014294962 |
| 1102.31998 | 517.769272 | 1.16853E-05 | 0.012880974 |
| 1102.35998 | 427.07893  | 9.63858E-06 | 0.010625181 |
| 1102.39998 | 373.663513 | 8.43307E-06 | 0.009296611 |
| 1102.43998 | 349.693249 | 7.89209E-06 | 0.008700555 |
| 1102.47998 | 313.453855 | 7.07422E-06 | 0.007799183 |
| 1102.51998 | 292.980246 | 6.61216E-06 | 0.007290034 |
| 1102.55998 | 294.042199 | 6.63612E-06 | 0.007316723 |
| 1102.59998 | 288.818045 | 6.51822E-06 | 0.00718699  |
| 1102.63998 | 314.076071 | 7.08826E-06 | 0.007815798 |
| 1102.67998 | 337.382779 | 7.61426E-06 | 0.008396091 |
| 1102.71998 | 344.624957 | 7.77771E-06 | 0.008576631 |
| 1102.75998 | 333.672622 | 7.53053E-06 | 0.008304363 |
| 1102.79998 | 288.645025 | 6.51432E-06 | 0.007183988 |
| 1102.83998 | 272.932017 | 6.1597E-06  | 0.006793158 |
| 1102.87998 | 286.24438  | 6.46014E-06 | 0.007124756 |
| 1102.91998 | 286.287527 | 6.46111E-06 | 0.007126088 |
| 1102.95998 | 313.428361 | 7.07364E-06 | 0.007801944 |
| 1102.99998 | 348.274325 | 7.86007E-06 | 0.008669653 |
| 1103.03998 | 381.141327 | 8.60183E-06 | 0.009488161 |
| 1103.07998 | 428.798046 | 9.67737E-06 | 0.010674918 |
| 1103.11998 | 477.567149 | 1.0778E-05  | 0.011889455 |

|            |            |             |             |
|------------|------------|-------------|-------------|
| 1103.15998 | 520.826326 | 1.17543E-05 | 0.012966901 |
| 1103.19998 | 555.794424 | 1.25435E-05 | 0.013837996 |
| 1103.23998 | 573.032701 | 1.29325E-05 | 0.014267706 |
| 1103.27998 | 546.165403 | 1.23262E-05 | 0.013599241 |
| 1103.31998 | 509.429595 | 1.14971E-05 | 0.012684998 |
| 1103.35998 | 460.053292 | 1.03828E-05 | 0.011455924 |
| 1103.39998 | 378.194743 | 8.53533E-06 | 0.009417881 |
| 1103.43998 | 334.72032  | 7.55417E-06 | 0.008335575 |
| 1103.47998 | 307.262986 | 6.9345E-06  | 0.007652079 |
| 1103.51998 | 286.903261 | 6.47501E-06 | 0.0071453   |
| 1103.55998 | 283.677298 | 6.4022E-06  | 0.007065213 |
| 1103.59998 | 267.558914 | 6.03843E-06 | 0.006664013 |
| 1103.63998 | 240.783061 | 5.43414E-06 | 0.005997332 |
| 1103.67998 | 254.934885 | 5.75353E-06 | 0.006350051 |
| 1103.71998 | 272.420151 | 6.14814E-06 | 0.006785829 |
| 1103.75998 | 272.058369 | 6.13998E-06 | 0.006777062 |
| 1103.79998 | 268.434694 | 6.0582E-06  | 0.006687038 |
| 1103.83998 | 264.588014 | 5.97138E-06 | 0.006591451 |
| 1103.87998 | 267.29597  | 6.0325E-06  | 0.006659153 |
| 1103.91998 | 254.70389  | 5.74831E-06 | 0.006345676 |
| 1103.95998 | 243.723309 | 5.5005E-06  | 0.006072327 |
| 1103.99998 | 255.989303 | 5.77732E-06 | 0.006378163 |
| 1104.03998 | 295.573753 | 6.67069E-06 | 0.007364706 |
| 1104.07998 | 345.814594 | 7.80455E-06 | 0.008616852 |
| 1104.11998 | 389.488883 | 8.79022E-06 | 0.009705459 |
| 1104.15998 | 447.978074 | 1.01102E-05 | 0.011163324 |
| 1104.19998 | 507.661981 | 1.14572E-05 | 0.012651066 |
| 1104.23998 | 541.490177 | 1.22207E-05 | 0.013494562 |
| 1104.27998 | 535.630337 | 1.20884E-05 | 0.013349012 |
| 1104.31998 | 480.73299  | 1.08495E-05 | 0.011981291 |
| 1104.35998 | 417.526921 | 9.423E-06   | 0.010406385 |
| 1104.39998 | 354.415042 | 7.99865E-06 | 0.008833713 |
| 1104.43998 | 312.957145 | 7.06301E-06 | 0.007800667 |
| 1104.47998 | 324.46231  | 7.32266E-06 | 0.008087734 |
| 1104.51998 | 313.893467 | 7.08414E-06 | 0.007824572 |
| 1104.55998 | 265.774707 | 5.99816E-06 | 0.006625333 |
| 1104.59998 | 242.756711 | 5.47868E-06 | 0.006051751 |
| 1104.63998 | 244.24537  | 5.51228E-06 | 0.006089082 |
| 1104.67998 | 257.07471  | 5.80182E-06 | 0.006409152 |
| 1104.71998 | 272.626821 | 6.15281E-06 | 0.00679713  |
| 1104.75998 | 279.682337 | 6.31204E-06 | 0.00697329  |
| 1104.79998 | 279.159767 | 6.30025E-06 | 0.006960513 |
| 1104.83998 | 304.129981 | 6.86379E-06 | 0.00758339  |
| 1104.87998 | 314.718788 | 7.10276E-06 | 0.007847702 |
| 1104.91998 | 295.814827 | 6.67613E-06 | 0.007376588 |
| 1104.95998 | 297.523522 | 6.71469E-06 | 0.007419465 |



|            |            |             |             |
|------------|------------|-------------|-------------|
| 1104.99998 | 335.382758 | 7.56912E-06 | 0.008363879 |
| 1105.03998 | 373.508725 | 8.42957E-06 | 0.009315014 |
| 1105.07998 | 391.54613  | 8.83665E-06 | 0.009765206 |
| 1105.11998 | 417.579319 | 9.42418E-06 | 0.010414854 |
| 1105.15998 | 454.566091 | 1.02589E-05 | 0.011337752 |
| 1105.19998 | 509.572598 | 1.15003E-05 | 0.01271018  |
| 1105.23998 | 552.143394 | 1.24611E-05 | 0.013772514 |
| 1105.27998 | 544.414228 | 1.22867E-05 | 0.013580211 |
| 1105.31998 | 515.195306 | 1.16272E-05 | 0.012851821 |
| 1105.35998 | 442.622706 | 9.98938E-06 | 0.011041859 |
| 1105.39998 | 375.580603 | 8.47633E-06 | 0.009369736 |
| 1105.43998 | 327.116818 | 7.38257E-06 | 0.008160989 |
| 1105.47998 | 289.289717 | 6.52887E-06 | 0.007217531 |
| 1105.51998 | 255.412096 | 5.7643E-06  | 0.006372544 |
| 1105.55998 | 226.325169 | 5.10784E-06 | 0.005647028 |
| 1105.59998 | 223.565693 | 5.04557E-06 | 0.005578378 |
| 1105.63998 | 240.380547 | 5.42505E-06 | 0.005998157 |
| 1105.67998 | 246.65408  | 5.56664E-06 | 0.006154921 |
| 1105.71998 | 265.109557 | 5.98315E-06 | 0.006615692 |
| 1105.75998 | 292.549936 | 6.60244E-06 | 0.007300719 |
| 1105.79998 | 276.632115 | 6.2432E-06  | 0.006903732 |
| 1105.83998 | 223.391313 | 5.04163E-06 | 0.005575237 |
| 1105.87998 | 222.761348 | 5.02741E-06 | 0.005559716 |
| 1105.91998 | 249.577157 | 5.63261E-06 | 0.006229215 |
| 1105.95998 | 265.567238 | 5.99348E-06 | 0.006628552 |
| 1105.99998 | 286.664682 | 6.46962E-06 | 0.007155402 |
| 1106.03998 | 313.609881 | 7.07774E-06 | 0.007828261 |
| 1106.07998 | 362.173827 | 8.17376E-06 | 0.009040831 |
| 1106.11998 | 404.949953 | 9.13916E-06 | 0.010109003 |
| 1106.15998 | 425.823645 | 9.61025E-06 | 0.01063047  |
| 1106.19998 | 463.591805 | 1.04626E-05 | 0.011573751 |
| 1106.23998 | 481.070532 | 1.08571E-05 | 0.012010549 |
| 1106.27998 | 454.358059 | 1.02542E-05 | 0.011344048 |
| 1106.31998 | 409.577576 | 9.2436E-06  | 0.010226374 |
| 1106.35998 | 364.896879 | 8.23521E-06 | 0.009111112 |
| 1106.39998 | 320.347299 | 7.22979E-06 | 0.007999042 |
| 1106.43998 | 264.945845 | 5.97946E-06 | 0.006615912 |
| 1106.47998 | 256.485871 | 5.78853E-06 | 0.006404891 |
| 1106.51998 | 284.537268 | 6.42161E-06 | 0.00710564  |
| 1106.55998 | 299.274436 | 6.75421E-06 | 0.007473935 |
| 1106.59998 | 308.273541 | 6.9573E-06  | 0.007698953 |
| 1106.63998 | 310.632434 | 7.01054E-06 | 0.007758145 |
| 1106.67998 | 296.954142 | 6.70184E-06 | 0.007416794 |
| 1106.71998 | 285.528848 | 6.44399E-06 | 0.007131691 |
| 1106.75998 | 267.441683 | 6.03579E-06 | 0.006680167 |
| 1106.79998 | 260.34512  | 5.87563E-06 | 0.006503144 |

|            |            |             |             |
|------------|------------|-------------|-------------|
| 1106.83998 | 244.793097 | 5.52464E-06 | 0.006114892 |
| 1106.87998 | 242.98703  | 5.48388E-06 | 0.006069996 |
| 1106.91998 | 271.619435 | 6.13007E-06 | 0.0067855   |
| 1106.95998 | 288.081196 | 6.50159E-06 | 0.007197001 |
| 1106.99998 | 306.519599 | 6.91772E-06 | 0.007657916 |
| 1107.03998 | 334.271723 | 7.54405E-06 | 0.008351562 |
| 1107.07998 | 372.946926 | 8.41689E-06 | 0.009318173 |
| 1107.11998 | 425.354817 | 9.59967E-06 | 0.010627982 |
| 1107.15998 | 482.116195 | 1.08807E-05 | 0.012046666 |
| 1107.19998 | 540.247703 | 1.21926E-05 | 0.013499689 |
| 1107.23998 | 558.197941 | 1.25978E-05 | 0.013948732 |
| 1107.27998 | 521.617785 | 1.17722E-05 | 0.013035107 |
| 1107.31998 | 467.362459 | 1.05477E-05 | 0.011679701 |
| 1107.35998 | 408.199617 | 9.2125E-06  | 0.01020155  |
| 1107.39998 | 368.419569 | 8.31472E-06 | 0.009207717 |
| 1107.43998 | 333.801888 | 7.53344E-06 | 0.008342837 |
| 1107.47998 | 280.103663 | 6.32155E-06 | 0.00700099  |
| 1107.51998 | 251.7288   | 5.68117E-06 | 0.006292007 |
| 1107.55998 | 258.33936  | 5.83036E-06 | 0.006457473 |
| 1107.59998 | 262.237556 | 5.91834E-06 | 0.006555149 |
| 1107.63998 | 263.071652 | 5.93716E-06 | 0.006576237 |
| 1107.67998 | 260.20342  | 5.87243E-06 | 0.006504772 |
| 1107.71998 | 260.234229 | 5.87312E-06 | 0.006505777 |
| 1107.75998 | 255.589903 | 5.76831E-06 | 0.006389901 |
| 1107.79998 | 241.551304 | 5.45148E-06 | 0.006039146 |
| 1107.83998 | 245.516628 | 5.54097E-06 | 0.006138506 |
| 1107.87998 | 272.693981 | 6.15432E-06 | 0.006818252 |
| 1107.91998 | 294.809997 | 6.65345E-06 | 0.007371491 |
| 1107.95998 | 295.010804 | 6.65798E-06 | 0.007376779 |
| 1107.99998 | 304.289788 | 6.8674E-06  | 0.007609075 |
| 1108.03998 | 352.663387 | 7.95912E-06 | 0.008819025 |
| 1108.07998 | 395.686867 | 8.9301E-06  | 0.009895267 |
| 1108.11998 | 417.847049 | 9.43023E-06 | 0.010449822 |
| 1108.15998 | 430.982814 | 9.72668E-06 | 0.01077872  |
| 1108.19998 | 456.515716 | 1.03029E-05 | 0.0114177   |
| 1108.23998 | 462.686172 | 1.04422E-05 | 0.011572444 |
| 1108.27998 | 469.201229 | 1.05892E-05 | 0.011735819 |
| 1108.31998 | 460.778298 | 1.03991E-05 | 0.011525557 |
| 1108.35998 | 414.606314 | 9.35709E-06 | 0.010371021 |
| 1108.39998 | 354.739782 | 8.00598E-06 | 0.008873831 |
| 1108.43998 | 307.375862 | 6.93705E-06 | 0.007689298 |
| 1108.47998 | 294.591885 | 6.64853E-06 | 0.007369761 |
| 1108.51998 | 250.798943 | 5.66018E-06 | 0.006274426 |
| 1108.55998 | 215.564967 | 4.865E-06   | 0.005393145 |
| 1108.59998 | 241.642807 | 5.45354E-06 | 0.006045796 |
| 1108.63998 | 285.008721 | 6.43225E-06 | 0.007131049 |

|            |            |             |             |
|------------|------------|-------------|-------------|
| 1108.67998 | 288.294784 | 6.50641E-06 | 0.007213528 |
| 1108.71998 | 266.182188 | 6.00736E-06 | 0.006660481 |
| 1108.75998 | 259.415313 | 5.85464E-06 | 0.006491393 |
| 1108.79998 | 270.23977  | 6.09894E-06 | 0.006762499 |
| 1108.83998 | 300.553067 | 6.78306E-06 | 0.007521333 |
| 1108.87998 | 305.397001 | 6.89238E-06 | 0.007642828 |
| 1108.91998 | 263.900572 | 5.95587E-06 | 0.006604581 |
| 1108.95998 | 257.456306 | 5.81043E-06 | 0.006443535 |
| 1108.99998 | 294.82734  | 6.65384E-06 | 0.007379111 |
| 1109.03998 | 339.471047 | 7.66139E-06 | 0.008496786 |
| 1109.07998 | 364.414375 | 8.22432E-06 | 0.009121434 |
| 1109.11998 | 419.230286 | 9.46144E-06 | 0.010493876 |
| 1109.15998 | 481.700537 | 1.08713E-05 | 0.012058022 |
| 1109.19998 | 511.330344 | 1.154E-05   | 0.012800183 |
| 1109.23998 | 551.182138 | 1.24394E-05 | 0.013798294 |
| 1109.27998 | 581.648979 | 1.3127E-05  | 0.014561526 |
| 1109.31998 | 547.064866 | 1.23465E-05 | 0.01369621  |
| 1109.35998 | 459.172868 | 1.03629E-05 | 0.011496178 |
| 1109.39998 | 383.970907 | 8.66569E-06 | 0.009613715 |
| 1109.43998 | 343.636259 | 7.75539E-06 | 0.008604142 |
| 1109.47998 | 295.622009 | 6.67178E-06 | 0.007402203 |
| 1109.51998 | 263.161668 | 5.93919E-06 | 0.006589653 |
| 1109.55998 | 261.69015  | 5.90598E-06 | 0.006553041 |
| 1109.59998 | 261.596153 | 5.90386E-06 | 0.006550924 |
| 1109.63998 | 268.624631 | 6.06248E-06 | 0.006727174 |
| 1109.67998 | 272.428899 | 6.14834E-06 | 0.006822691 |
| 1109.71998 | 264.560895 | 5.97077E-06 | 0.006625884 |
| 1109.75998 | 266.587083 | 6.0165E-06  | 0.00667687  |
| 1109.79998 | 249.51685  | 5.63125E-06 | 0.006249559 |
| 1109.83998 | 238.133246 | 5.37434E-06 | 0.005964653 |
| 1109.87998 | 243.085135 | 5.48609E-06 | 0.006088905 |
| 1109.91998 | 232.041118 | 5.23684E-06 | 0.005812479 |
| 1109.95998 | 231.419363 | 5.22281E-06 | 0.005797113 |
| 1109.99998 | 230.968268 | 5.21263E-06 | 0.005786022 |
| 1110.03998 | 255.373381 | 5.76342E-06 | 0.006397628 |
| 1110.07998 | 315.373406 | 7.11754E-06 | 0.007901037 |
| 1110.11998 | 367.325128 | 8.29002E-06 | 0.009202913 |
| 1110.15998 | 396.59689  | 8.95064E-06 | 0.009936642 |
| 1110.19998 | 428.126682 | 9.66222E-06 | 0.010727    |
| 1110.23998 | 464.838471 | 1.04908E-05 | 0.011647258 |
| 1110.27998 | 473.30984  | 1.06819E-05 | 0.011859948 |
| 1110.31998 | 439.063498 | 9.90905E-06 | 0.011002218 |
| 1110.35998 | 371.678279 | 8.38826E-06 | 0.009313989 |
| 1110.39998 | 322.383061 | 7.27574E-06 | 0.008078978 |
| 1110.43998 | 287.145489 | 6.48047E-06 | 0.007196177 |
| 1110.47998 | 256.523656 | 5.78938E-06 | 0.006428992 |

|            |            |             |             |
|------------|------------|-------------|-------------|
| 1110.51998 | 237.217624 | 5.35367E-06 | 0.005945359 |
| 1110.55998 | 250.538889 | 5.65431E-06 | 0.006279455 |
| 1110.59998 | 274.302983 | 6.19064E-06 | 0.00687532  |
| 1110.63998 | 299.485454 | 6.75897E-06 | 0.007506782 |
| 1110.67998 | 288.726646 | 6.51616E-06 | 0.007237367 |
| 1110.71998 | 266.23684  | 6.00859E-06 | 0.006673866 |
| 1110.75998 | 265.495678 | 5.99187E-06 | 0.006655527 |
| 1110.79998 | 293.606703 | 6.62629E-06 | 0.007360488 |
| 1110.83998 | 306.558256 | 6.91859E-06 | 0.00768545  |
| 1110.87998 | 263.591244 | 5.94889E-06 | 0.0066085   |
| 1110.91998 | 235.244026 | 5.30913E-06 | 0.005898019 |
| 1110.95998 | 263.833188 | 5.95435E-06 | 0.006615042 |
| 1110.99998 | 319.559548 | 7.21201E-06 | 0.008012547 |
| 1111.03998 | 374.115382 | 8.44326E-06 | 0.009380803 |
| 1111.07998 | 418.252588 | 9.43938E-06 | 0.010487904 |
| 1111.11998 | 485.667527 | 1.09608E-05 | 0.012178808 |
| 1111.15998 | 521.500448 | 1.17695E-05 | 0.01307784  |
| 1111.19998 | 539.721027 | 1.21808E-05 | 0.013535251 |
| 1111.23998 | 559.233143 | 1.26211E-05 | 0.014025085 |
| 1111.27998 | 558.895409 | 1.26135E-05 | 0.01401712  |
| 1111.31998 | 519.025116 | 1.17137E-05 | 0.01301764  |
| 1111.35998 | 446.60313  | 1.00792E-05 | 0.011201631 |
| 1111.39998 | 376.665309 | 8.50081E-06 | 0.009447802 |
| 1111.43998 | 320.982773 | 7.24413E-06 | 0.00805142  |
| 1111.47998 | 291.707912 | 6.58344E-06 | 0.007317363 |
| 1111.51998 | 279.736991 | 6.31327E-06 | 0.00701733  |
| 1111.55998 | 265.868682 | 6.00029E-06 | 0.006669678 |
| 1111.59998 | 246.508728 | 5.56336E-06 | 0.006184229 |
| 1111.63998 | 235.924022 | 5.32448E-06 | 0.005918901 |
| 1111.67998 | 228.353866 | 5.15363E-06 | 0.005729186 |
| 1111.71998 | 225.328508 | 5.08535E-06 | 0.005653486 |
| 1111.75998 | 231.539432 | 5.22552E-06 | 0.005809527 |
| 1111.79998 | 250.884039 | 5.6621E-06  | 0.006295126 |
| 1111.83998 | 232.777123 | 5.25346E-06 | 0.005841002 |
| 1111.87998 | 216.6471   | 4.88942E-06 | 0.005436452 |
| 1111.91998 | 221.57816  | 5.00071E-06 | 0.00556039  |
| 1111.95998 | 246.851257 | 5.57109E-06 | 0.006194828 |
| 1111.99998 | 280.586254 | 6.33244E-06 | 0.007041674 |
| 1112.03998 | 302.739776 | 6.83242E-06 | 0.007597919 |
| 1112.07998 | 320.120477 | 7.22467E-06 | 0.008034415 |
| 1112.11998 | 366.024694 | 8.26067E-06 | 0.009186853 |
| 1112.15998 | 430.533891 | 9.71655E-06 | 0.010806358 |
| 1112.19998 | 458.590748 | 1.03498E-05 | 0.011510997 |
| 1112.23998 | 485.109807 | 1.09483E-05 | 0.012177084 |
| 1112.27998 | 517.579847 | 1.16811E-05 | 0.012992605 |
| 1112.31998 | 470.434674 | 1.06171E-05 | 0.011809563 |

|            |            |             |             |
|------------|------------|-------------|-------------|
| 1112.35998 | 407.257712 | 9.19124E-06 | 0.010223967 |
| 1112.39998 | 354.964107 | 8.01105E-06 | 0.008911487 |
| 1112.43998 | 303.306796 | 6.84521E-06 | 0.007614887 |
| 1112.47998 | 278.314268 | 6.28117E-06 | 0.006987671 |
| 1112.51998 | 243.523333 | 5.49598E-06 | 0.00611439  |
| 1112.55998 | 226.519678 | 5.11223E-06 | 0.005687667 |
| 1112.59998 | 260.949336 | 5.88926E-06 | 0.006552394 |
| 1112.63998 | 295.399582 | 6.66676E-06 | 0.0074177   |
| 1112.67998 | 303.12605  | 6.84113E-06 | 0.007611991 |
| 1112.71998 | 265.082947 | 5.98255E-06 | 0.006656906 |
| 1112.75998 | 212.692242 | 4.80017E-06 | 0.005341434 |
| 1112.79998 | 195.919174 | 4.42162E-06 | 0.004920382 |
| 1112.83998 | 230.475943 | 5.20152E-06 | 0.005788461 |
| 1112.87998 | 271.807548 | 6.13432E-06 | 0.006826759 |
| 1112.91998 | 298.872512 | 6.74514E-06 | 0.007506797 |
| 1112.95998 | 313.063278 | 7.0654E-06  | 0.00786351  |
| 1112.99998 | 328.149318 | 7.40587E-06 | 0.008242737 |
| 1113.03998 | 383.667393 | 8.65884E-06 | 0.009637634 |
| 1113.07998 | 451.055758 | 1.01797E-05 | 0.01133082  |
| 1113.11998 | 491.726597 | 1.10976E-05 | 0.012352943 |
| 1113.15998 | 549.165594 | 1.23939E-05 | 0.013796396 |
| 1113.19998 | 568.343992 | 1.28267E-05 | 0.014278718 |
| 1113.23998 | 536.502294 | 1.21081E-05 | 0.013479232 |
| 1113.27998 | 514.522088 | 1.1612E-05  | 0.012927459 |
| 1113.31998 | 503.707406 | 1.1368E-05  | 0.012656193 |
| 1113.35998 | 467.634416 | 1.05539E-05 | 0.011750242 |
| 1113.39998 | 412.970737 | 9.32017E-06 | 0.010377082 |
| 1113.43998 | 363.019113 | 8.19284E-06 | 0.009122231 |
| 1113.47998 | 296.916614 | 6.70099E-06 | 0.007461423 |
| 1113.51998 | 247.590918 | 5.58778E-06 | 0.006222107 |
| 1113.55998 | 244.405162 | 5.51588E-06 | 0.006142268 |
| 1113.59998 | 250.9955   | 5.66462E-06 | 0.006308119 |
| 1113.63998 | 252.06145  | 5.68868E-06 | 0.006335137 |
| 1113.67998 | 250.169736 | 5.64598E-06 | 0.006287818 |
| 1113.71998 | 256.804125 | 5.79571E-06 | 0.0064548   |
| 1113.75998 | 261.389962 | 5.89921E-06 | 0.006570301 |
| 1113.79998 | 257.681099 | 5.8155E-06  | 0.006477308 |
| 1113.83998 | 246.066589 | 5.55338E-06 | 0.006185577 |
| 1113.87998 | 221.329673 | 4.9951E-06  | 0.005563945 |
| 1113.91998 | 234.331025 | 5.28852E-06 | 0.005890993 |
| 1113.95998 | 267.108189 | 6.02826E-06 | 0.00671524  |
| 1113.99998 | 302.093328 | 6.81783E-06 | 0.007595058 |
| 1114.03998 | 325.876576 | 7.35458E-06 | 0.008193297 |
| 1114.07998 | 334.16475  | 7.54163E-06 | 0.008401982 |
| 1114.11998 | 371.201911 | 8.37751E-06 | 0.009333551 |
| 1114.15998 | 415.691799 | 9.38158E-06 | 0.010452586 |

|            |            |             |             |
|------------|------------|-------------|-------------|
| 1114.19998 | 487.543812 | 1.10032E-05 | 0.012259748 |
| 1114.23998 | 503.143296 | 1.13552E-05 | 0.012652466 |
| 1114.27998 | 469.972503 | 1.06066E-05 | 0.01181875  |
| 1114.31998 | 433.880598 | 9.79208E-06 | 0.010911511 |
| 1114.35998 | 397.112709 | 8.96228E-06 | 0.009987207 |
| 1114.39998 | 355.503696 | 8.02322E-06 | 0.00894108  |
| 1114.43998 | 319.322131 | 7.20666E-06 | 0.008031385 |
| 1114.47998 | 285.233944 | 6.43733E-06 | 0.007174279 |
| 1114.51998 | 279.32726  | 6.30403E-06 | 0.007025964 |
| 1114.55998 | 296.429347 | 6.69E-06    | 0.007456403 |
| 1114.59998 | 298.033312 | 6.7262E-06  | 0.007497019 |
| 1114.63998 | 282.661119 | 6.37927E-06 | 0.007110587 |
| 1114.67998 | 291.540381 | 6.57966E-06 | 0.007334216 |
| 1114.71998 | 317.263721 | 7.1602E-06  | 0.007981618 |
| 1114.75998 | 323.433699 | 7.29945E-06 | 0.008137133 |
| 1114.79998 | 317.47407  | 7.16495E-06 | 0.007987483 |
| 1114.83998 | 320.610939 | 7.23574E-06 | 0.008066695 |
| 1114.87998 | 341.864851 | 7.71541E-06 | 0.00860176  |
| 1114.91998 | 347.690928 | 7.8469E-06  | 0.008748666 |
| 1114.95998 | 358.256271 | 8.08535E-06 | 0.009014836 |
| 1114.99998 | 403.017542 | 9.09554E-06 | 0.010141532 |
| 1115.03998 | 444.798356 | 1.00385E-05 | 0.011193306 |
| 1115.07998 | 510.077614 | 1.15117E-05 | 0.012836512 |
| 1115.11998 | 577.376    | 1.30306E-05 | 0.014530651 |
| 1115.15998 | 618.163566 | 1.39511E-05 | 0.015557698 |
| 1115.19998 | 658.453779 | 1.48604E-05 | 0.016572301 |
| 1115.23998 | 642.231173 | 1.44943E-05 | 0.016164582 |
| 1115.27998 | 635.342749 | 1.43388E-05 | 0.015991778 |
| 1115.31998 | 607.514228 | 1.37107E-05 | 0.015291873 |
| 1115.35998 | 516.633914 | 1.16597E-05 | 0.013004771 |
| 1115.39998 | 416.632783 | 9.40282E-06 | 0.010487907 |
| 1115.43998 | 342.731019 | 7.73496E-06 | 0.008627886 |
| 1115.47998 | 284.691291 | 6.42509E-06 | 0.007167055 |
| 1115.51998 | 252.951024 | 5.70875E-06 | 0.006368227 |
| 1115.55998 | 255.107557 | 5.75742E-06 | 0.00642275  |
| 1115.59998 | 250.194293 | 5.64654E-06 | 0.006299276 |
| 1115.63998 | 253.953432 | 5.73138E-06 | 0.006394151 |
| 1115.67998 | 270.534409 | 6.10558E-06 | 0.006811879 |
| 1115.71998 | 263.298319 | 5.94228E-06 | 0.006629916 |
| 1115.75998 | 243.690635 | 5.49976E-06 | 0.00613641  |
| 1115.79998 | 254.967651 | 5.75426E-06 | 0.006420608 |
| 1115.83998 | 262.890994 | 5.93308E-06 | 0.006620372 |
| 1115.87998 | 269.937757 | 6.09212E-06 | 0.006798074 |
| 1115.91998 | 260.134605 | 5.87088E-06 | 0.006551427 |
| 1115.95998 | 263.274841 | 5.94175E-06 | 0.006630751 |
| 1115.99998 | 292.323842 | 6.59734E-06 | 0.007362633 |

|             |            |             |             |
|-------------|------------|-------------|-------------|
| 1116.03998  | 336.931155 | 7.60407E-06 | 0.008486443 |
| 1116.07998  | 379.695524 | 8.5692E-06  | 0.009563912 |
| 1116.11998  | 402.826447 | 9.09123E-06 | 0.010146905 |
| 1116.15998  | 440.951025 | 9.95165E-06 | 0.011107634 |
| 1116.19998  | 502.511432 | 1.1341E-05  | 0.012658805 |
| 1116.23998  | 549.909577 | 1.24107E-05 | 0.013853312 |
| 1116.27998  | 561.775826 | 1.26785E-05 | 0.014152753 |
| 1116.31998  | 517.618167 | 1.16819E-05 | 0.013040762 |
| 1116.35998  | 442.097651 | 9.97753E-06 | 0.011138513 |
| 1116.39998  | 389.787985 | 8.79697E-06 | 0.009820939 |
| 1116.43998  | 330.333784 | 7.45517E-06 | 0.008323254 |
| 1116.47998  | 285.099891 | 6.43431E-06 | 0.007183775 |
| 1116.51998  | 266.713487 | 6.01935E-06 | 0.006720727 |
| 1116.55998  | 260.255739 | 5.87361E-06 | 0.006558237 |
| 1116.59998  | 272.931777 | 6.15969E-06 | 0.00687791  |
| 1116.63998  | 290.480362 | 6.55574E-06 | 0.007320398 |
| 1116.67998  | 279.307112 | 6.30357E-06 | 0.007039073 |
| 1116.71998  | 275.945669 | 6.22771E-06 | 0.006954608 |
| 1116.75998  | 303.853649 | 6.85755E-06 | 0.007658241 |
| 1116.79998  | 313.474239 | 7.07468E-06 | 0.007900999 |
| 1116.83998  | 278.803415 | 6.2922E-06  | 0.007027386 |
| 1116.87998  | 275.497384 | 6.21759E-06 | 0.006944304 |
| 1116.91998  | 308.730137 | 6.96761E-06 | 0.007782262 |
| 1116.95998  | 337.123045 | 7.6084E-06  | 0.008498276 |
| 1116.99998  | 366.568758 | 8.27295E-06 | 0.009240881 |
| 1117.03998  | 389.097321 | 8.78138E-06 | 0.009809158 |
| 1117.07998  | 452.019415 | 1.02014E-05 | 0.011395834 |
| 1117.11998  | 545.393305 | 1.23088E-05 | 0.01375037  |
| 1117.159979 | 596.269694 | 1.3457E-05  | 0.015033596 |
| 1117.199979 | 603.748231 | 1.36258E-05 | 0.015222695 |
| 1117.239979 | 601.558606 | 1.35763E-05 | 0.01516803  |
| 1117.279979 | 572.768063 | 1.29266E-05 | 0.014442606 |
| 1117.319979 | 513.177958 | 1.15817E-05 | 0.012940478 |
| 1117.359979 | 410.412006 | 9.26243E-06 | 0.010349466 |
| 1117.399979 | 342.086709 | 7.72042E-06 | 0.008626798 |
| 1117.439979 | 308.767268 | 6.96845E-06 | 0.007786821 |
| 1117.479979 | 261.404721 | 5.89954E-06 | 0.006592618 |
| 1117.519979 | 225.614506 | 5.09181E-06 | 0.005690194 |
| 1117.559979 | 230.72547  | 5.20715E-06 | 0.005819305 |
| 1117.599979 | 238.054209 | 5.37255E-06 | 0.006004364 |
| 1117.639979 | 259.065485 | 5.84675E-06 | 0.006534558 |
| 1117.679979 | 272.7793   | 6.15625E-06 | 0.006880716 |
| 1117.719979 | 248.447268 | 5.60711E-06 | 0.006267178 |
| 1117.759979 | 248.408696 | 5.60624E-06 | 0.006266429 |
| 1117.799979 | 243.598505 | 5.49768E-06 | 0.006145305 |
| 1117.839979 | 252.602274 | 5.70088E-06 | 0.006372673 |

|             |            |             |             |
|-------------|------------|-------------|-------------|
| 1117.879979 | 271.774402 | 6.13357E-06 | 0.006856595 |
| 1117.919979 | 261.892634 | 5.91055E-06 | 0.006607524 |
| 1117.959979 | 275.091764 | 6.20844E-06 | 0.006940785 |
| 1117.999979 | 297.998207 | 6.7254E-06  | 0.007519002 |
| 1118.039979 | 303.986939 | 6.86056E-06 | 0.007670382 |
| 1118.079979 | 325.359677 | 7.34291E-06 | 0.008209966 |
| 1118.119979 | 382.332755 | 8.62872E-06 | 0.009647942 |
| 1118.159979 | 425.585778 | 9.60488E-06 | 0.01073979  |
| 1118.199979 | 461.497622 | 1.04154E-05 | 0.011646454 |
| 1118.239979 | 491.167917 | 1.1085E-05  | 0.012395663 |
| 1118.279979 | 464.410604 | 1.04811E-05 | 0.011720805 |
| 1118.319979 | 415.405381 | 9.37512E-06 | 0.010484385 |
| 1118.359979 | 369.443714 | 8.33783E-06 | 0.009324695 |
| 1118.399979 | 316.718901 | 7.1479E-06  | 0.007994216 |
| 1118.439979 | 293.335911 | 6.62018E-06 | 0.007404277 |
| 1118.479979 | 276.664251 | 6.24393E-06 | 0.006983707 |
| 1118.519979 | 283.69462  | 6.40259E-06 | 0.007161428 |
| 1118.559979 | 291.158804 | 6.57105E-06 | 0.007350112 |
| 1118.599979 | 277.869286 | 6.27112E-06 | 0.007014878 |
| 1118.639979 | 273.707127 | 6.17719E-06 | 0.00691005  |
| 1118.679979 | 276.913069 | 6.24954E-06 | 0.006991238 |
| 1118.719979 | 278.973499 | 6.29604E-06 | 0.007043509 |
| 1118.759979 | 276.566214 | 6.24171E-06 | 0.00698298  |
| 1118.799979 | 253.588982 | 5.72315E-06 | 0.00640306  |
| 1118.839979 | 236.163602 | 5.32988E-06 | 0.005963287 |
| 1118.879979 | 242.644616 | 5.47615E-06 | 0.006127156 |
| 1118.919979 | 255.462261 | 5.76543E-06 | 0.006451052 |
| 1118.959979 | 280.189726 | 6.32349E-06 | 0.007075734 |
| 1118.999979 | 312.402461 | 7.05049E-06 | 0.007889496 |
| 1119.039979 | 376.533901 | 8.49785E-06 | 0.009509429 |
| 1119.079979 | 415.797617 | 9.38397E-06 | 0.010501416 |
| 1119.119979 | 457.990173 | 1.03362E-05 | 0.011567448 |
| 1119.159979 | 474.609098 | 1.07113E-05 | 0.011987621 |
| 1119.199979 | 462.794695 | 1.04446E-05 | 0.011689632 |
| 1119.239979 | 519.645572 | 1.17277E-05 | 0.013126085 |
| 1119.279979 | 536.842298 | 1.21158E-05 | 0.013560953 |
| 1119.319979 | 497.594973 | 1.123E-05   | 0.012569992 |
| 1119.359979 | 438.306912 | 9.89198E-06 | 0.011072683 |
| 1119.399979 | 375.961112 | 8.48492E-06 | 0.009498018 |
| 1119.439979 | 309.877121 | 6.99349E-06 | 0.007828798 |
| 1119.479979 | 270.690849 | 6.10912E-06 | 0.006839032 |
| 1119.519979 | 277.486384 | 6.26248E-06 | 0.007010973 |
| 1119.559979 | 257.275133 | 5.80634E-06 | 0.006500547 |
| 1119.599979 | 232.234462 | 5.24121E-06 | 0.005868057 |
| 1119.639979 | 234.200555 | 5.28558E-06 | 0.005917947 |
| 1119.679979 | 239.568313 | 5.40672E-06 | 0.0060538   |



|             |            |             |             |
|-------------|------------|-------------|-------------|
| 1119.719979 | 251.955971 | 5.6863E-06  | 0.006367058 |
| 1119.759979 | 249.382272 | 5.62821E-06 | 0.006302245 |
| 1119.799979 | 226.003813 | 5.10059E-06 | 0.005711642 |
| 1119.839979 | 220.707165 | 4.98105E-06 | 0.005577983 |
| 1119.879979 | 232.424793 | 5.2455E-06  | 0.005874335 |
| 1119.919979 | 238.872034 | 5.39101E-06 | 0.006037499 |
| 1119.959979 | 273.638243 | 6.17563E-06 | 0.006916463 |
| 1119.999979 | 305.198772 | 6.88791E-06 | 0.00771446  |
| 1120.039979 | 314.276437 | 7.09278E-06 | 0.007944199 |
| 1120.079979 | 329.595266 | 7.43851E-06 | 0.008331722 |
| 1120.119979 | 368.330811 | 8.31271E-06 | 0.009311236 |
| 1120.159979 | 434.401323 | 9.80383E-06 | 0.010981861 |
| 1120.199979 | 498.547104 | 1.12515E-05 | 0.012603945 |
| 1120.239979 | 483.574691 | 1.09136E-05 | 0.012225859 |
| 1120.279979 | 449.83683  | 1.01522E-05 | 0.011373296 |
| 1120.319979 | 405.420747 | 9.14978E-06 | 0.010250683 |
| 1120.359979 | 356.99527  | 8.05689E-06 | 0.009026613 |
| 1120.399979 | 301.503345 | 6.80451E-06 | 0.007623773 |
| 1120.439979 | 268.477507 | 6.05916E-06 | 0.006788929 |
| 1120.479979 | 255.497941 | 5.76623E-06 | 0.006460948 |
| 1120.519979 | 261.981645 | 5.91256E-06 | 0.006625143 |
| 1120.559979 | 263.453293 | 5.94577E-06 | 0.006662596 |
| 1120.599979 | 267.850477 | 6.04501E-06 | 0.006774041 |
| 1120.639979 | 296.803683 | 6.69845E-06 | 0.007506546 |
| 1120.679979 | 335.700428 | 7.57629E-06 | 0.008490598 |
| 1120.719979 | 344.219371 | 7.76855E-06 | 0.008706371 |
| 1120.759979 | 325.216338 | 7.33968E-06 | 0.008226019 |
| 1120.799979 | 294.583899 | 6.64835E-06 | 0.007451469 |
| 1120.839979 | 258.547922 | 5.83507E-06 | 0.006540176 |
| 1120.879979 | 252.228989 | 5.69246E-06 | 0.006380561 |
| 1120.919979 | 268.151219 | 6.0518E-06  | 0.006783583 |
| 1120.959979 | 279.755916 | 6.3137E-06  | 0.007077407 |
| 1120.999979 | 296.823374 | 6.69889E-06 | 0.007509456 |
| 1121.039979 | 342.932208 | 7.7395E-06  | 0.008676291 |
| 1121.079979 | 404.35089  | 9.12564E-06 | 0.010230568 |
| 1121.119979 | 455.463917 | 1.02792E-05 | 0.011524201 |
| 1121.159979 | 500.793712 | 1.13022E-05 | 0.012671593 |
| 1121.199979 | 527.741256 | 1.19104E-05 | 0.013353923 |
| 1121.239979 | 556.838333 | 1.25671E-05 | 0.014090696 |
| 1121.279979 | 537.270308 | 1.21254E-05 | 0.013596016 |
| 1121.319979 | 475.270844 | 1.07262E-05 | 0.012027503 |
| 1121.359979 | 398.672191 | 8.99748E-06 | 0.01008941  |
| 1121.399979 | 326.449841 | 7.36752E-06 | 0.008261935 |
| 1121.439979 | 283.406988 | 6.3961E-06  | 0.007172843 |
| 1121.479979 | 266.817866 | 6.02171E-06 | 0.006753225 |
| 1121.519979 | 255.966638 | 5.77681E-06 | 0.006478808 |

|             |            |             |             |
|-------------|------------|-------------|-------------|
| 1121.559979 | 260.234621 | 5.87313E-06 | 0.006587071 |
| 1121.599979 | 245.015902 | 5.52967E-06 | 0.006202075 |
| 1121.639979 | 229.885277 | 5.18819E-06 | 0.005819282 |
| 1121.679979 | 260.239123 | 5.87323E-06 | 0.00658789  |
| 1121.719979 | 285.039923 | 6.43295E-06 | 0.007215973 |
| 1121.759979 | 281.442388 | 6.35176E-06 | 0.007125153 |
| 1121.799979 | 281.476528 | 6.35253E-06 | 0.007126272 |
| 1121.839979 | 275.067631 | 6.20789E-06 | 0.006964263 |
| 1121.879979 | 276.128843 | 6.23184E-06 | 0.00699138  |
| 1121.919979 | 257.439061 | 5.81004E-06 | 0.006518401 |
| 1121.959979 | 247.637068 | 5.58882E-06 | 0.006270437 |
| 1121.999979 | 267.740625 | 6.04253E-06 | 0.006779722 |
| 1122.039979 | 305.248939 | 6.88904E-06 | 0.007729782 |
| 1122.079979 | 348.096911 | 7.85606E-06 | 0.00881513  |
| 1122.119979 | 388.508869 | 8.7681E-06  | 0.009838865 |
| 1122.159979 | 421.746713 | 9.51824E-06 | 0.010680983 |
| 1122.199979 | 450.257686 | 1.01617E-05 | 0.011403447 |
| 1122.239979 | 455.96523  | 1.02905E-05 | 0.011548411 |
| 1122.279979 | 449.790111 | 1.01511E-05 | 0.011392417 |
| 1122.319979 | 427.970858 | 9.65871E-06 | 0.010840159 |
| 1122.359979 | 361.314632 | 8.15437E-06 | 0.009152136 |
| 1122.399979 | 310.318928 | 7.00347E-06 | 0.00786069  |
| 1122.439979 | 295.370423 | 6.6661E-06  | 0.007482296 |
| 1122.479979 | 290.199357 | 6.5494E-06  | 0.007351565 |
| 1122.519979 | 263.732423 | 5.95207E-06 | 0.006681321 |
| 1122.559979 | 231.57698  | 5.22637E-06 | 0.005866914 |
| 1122.599979 | 237.320806 | 5.356E-06   | 0.006012646 |
| 1122.639979 | 264.470507 | 5.96873E-06 | 0.006700736 |
| 1122.679979 | 262.487604 | 5.92398E-06 | 0.006650733 |
| 1122.719979 | 258.902908 | 5.84308E-06 | 0.00656014  |
| 1122.759979 | 277.248881 | 6.25712E-06 | 0.007025245 |
| 1122.799979 | 256.886257 | 5.79757E-06 | 0.006509506 |
| 1122.839979 | 254.988549 | 5.75474E-06 | 0.006461648 |
| 1122.879979 | 278.221074 | 6.27906E-06 | 0.007050633 |
| 1122.919979 | 264.405014 | 5.96725E-06 | 0.006700747 |
| 1122.959979 | 259.697536 | 5.86101E-06 | 0.006581682 |
| 1122.999979 | 295.292685 | 6.66434E-06 | 0.007484059 |
| 1123.039979 | 345.681476 | 7.80155E-06 | 0.008761452 |
| 1123.079979 | 400.4201   | 9.03692E-06 | 0.010149188 |
| 1123.119979 | 480.517186 | 1.08446E-05 | 0.012179791 |
| 1123.159979 | 529.391216 | 1.19476E-05 | 0.013419091 |
| 1123.199979 | 538.362388 | 1.21501E-05 | 0.01364698  |
| 1123.239979 | 551.490898 | 1.24464E-05 | 0.013980273 |
| 1123.279979 | 558.582719 | 1.26064E-05 | 0.014160555 |
| 1123.319979 | 505.29358  | 1.14038E-05 | 0.012810085 |
| 1123.359979 | 420.378672 | 9.48736E-06 | 0.010657722 |

|             |            |             |             |
|-------------|------------|-------------|-------------|
| 1123.399979 | 366.512117 | 8.27167E-06 | 0.009292392 |
| 1123.439979 | 341.410668 | 7.70516E-06 | 0.008656288 |
| 1123.479979 | 293.59109  | 6.62594E-06 | 0.007444113 |
| 1123.519979 | 238.74281  | 5.38809E-06 | 0.00605363  |
| 1123.559979 | 225.937239 | 5.09909E-06 | 0.005729132 |
| 1123.599979 | 249.12385  | 5.62238E-06 | 0.006317304 |
| 1123.639979 | 251.224722 | 5.66979E-06 | 0.006370805 |
| 1123.679979 | 251.289427 | 5.67125E-06 | 0.006372673 |
| 1123.719979 | 264.427592 | 5.96776E-06 | 0.006706094 |
| 1123.759979 | 259.407261 | 5.85446E-06 | 0.006579008 |
| 1123.799979 | 250.92748  | 5.66308E-06 | 0.006364173 |
| 1123.839979 | 235.721473 | 5.31991E-06 | 0.005978722 |
| 1123.879979 | 238.630652 | 5.38556E-06 | 0.006052725 |
| 1123.919979 | 258.555804 | 5.83524E-06 | 0.006558348 |
| 1123.959979 | 283.877723 | 6.40672E-06 | 0.007200902 |
| 1123.999979 | 294.932904 | 6.65622E-06 | 0.007481597 |
| 1124.039979 | 284.453387 | 6.41972E-06 | 0.007216018 |
| 1124.079979 | 278.194006 | 6.27845E-06 | 0.007057481 |
| 1124.119979 | 297.044854 | 6.70389E-06 | 0.007535975 |
| 1124.159979 | 377.516738 | 8.52003E-06 | 0.009577873 |
| 1124.199979 | 441.735444 | 9.96935E-06 | 0.011207547 |
| 1124.239979 | 454.135695 | 1.02492E-05 | 0.011522572 |
| 1124.279979 | 438.27415  | 9.89124E-06 | 0.01112052  |
| 1124.319979 | 429.150957 | 9.68534E-06 | 0.010889421 |
| 1124.359979 | 405.051105 | 9.14144E-06 | 0.010278268 |
| 1124.399979 | 365.344114 | 8.24531E-06 | 0.009271024 |
| 1124.439979 | 318.567011 | 7.18961E-06 | 0.008084289 |
| 1124.479979 | 278.260443 | 6.27995E-06 | 0.007061679 |
| 1124.519979 | 267.616069 | 6.03972E-06 | 0.006791788 |
| 1124.559979 | 259.078432 | 5.84704E-06 | 0.006575346 |
| 1124.599979 | 231.115058 | 5.21594E-06 | 0.005865852 |
| 1124.639979 | 222.971867 | 5.03216E-06 | 0.005659373 |
| 1124.679979 | 235.490632 | 5.3147E-06  | 0.005977332 |
| 1124.719979 | 273.395501 | 6.17016E-06 | 0.006939697 |
| 1124.759979 | 323.836467 | 7.30854E-06 | 0.008220351 |
| 1124.799979 | 326.301437 | 7.36417E-06 | 0.008283217 |
| 1124.839979 | 292.173193 | 6.59394E-06 | 0.00741713  |
| 1124.879979 | 262.612739 | 5.9268E-06  | 0.006666943 |
| 1124.919979 | 242.129507 | 5.46453E-06 | 0.006147154 |
| 1124.959979 | 254.38351  | 5.74108E-06 | 0.006458487 |
| 1124.999979 | 291.385288 | 6.57616E-06 | 0.00739818  |
| 1125.039979 | 349.199527 | 7.88095E-06 | 0.00886638  |
| 1125.079979 | 434.417254 | 9.80419E-06 | 0.011030501 |
| 1125.119979 | 493.169244 | 1.11301E-05 | 0.012522746 |
| 1125.159979 | 520.31206  | 1.17427E-05 | 0.013212437 |
| 1125.199979 | 516.356643 | 1.16535E-05 | 0.013112462 |

|             |            |             |             |
|-------------|------------|-------------|-------------|
| 1125.239979 | 506.019692 | 1.14202E-05 | 0.01285042  |
| 1125.279979 | 505.853679 | 1.14164E-05 | 0.012846661 |
| 1125.319979 | 460.801466 | 1.03996E-05 | 0.011702931 |
| 1125.359979 | 423.6381   | 9.56092E-06 | 0.010759479 |
| 1125.399979 | 387.03934  | 8.73494E-06 | 0.0098303   |
| 1125.439979 | 331.614179 | 7.48407E-06 | 0.008422872 |
| 1125.479979 | 288.750255 | 6.51669E-06 | 0.007334405 |
| 1125.519979 | 235.925962 | 5.32452E-06 | 0.005992854 |
| 1125.559979 | 217.125602 | 4.90022E-06 | 0.005515494 |
| 1125.599979 | 228.381068 | 5.15424E-06 | 0.005801615 |
| 1125.639979 | 247.016165 | 5.57481E-06 | 0.00627523  |
| 1125.679979 | 275.176895 | 6.21036E-06 | 0.006990877 |
| 1125.719979 | 276.690231 | 6.24451E-06 | 0.007029573 |
| 1125.759979 | 280.966179 | 6.34102E-06 | 0.007138461 |
| 1125.799979 | 272.710347 | 6.15469E-06 | 0.006928953 |
| 1125.839979 | 251.601456 | 5.67829E-06 | 0.006392851 |
| 1125.879979 | 251.011784 | 5.66499E-06 | 0.006378095 |
| 1125.919979 | 275.476628 | 6.21712E-06 | 0.006999984 |
| 1125.959979 | 270.849536 | 6.1127E-06  | 0.006882652 |
| 1125.999979 | 251.508698 | 5.6762E-06  | 0.006391402 |
| 1126.039979 | 265.92205  | 6.00149E-06 | 0.006757918 |
| 1126.079979 | 316.669101 | 7.14678E-06 | 0.008047846 |
| 1126.119979 | 369.376016 | 8.3363E-06  | 0.009387676 |
| 1126.159979 | 423.784029 | 9.56422E-06 | 0.010770836 |
| 1126.199979 | 460.649854 | 1.03962E-05 | 0.011708229 |
| 1126.239979 | 470.972118 | 1.06292E-05 | 0.011971013 |
| 1126.279979 | 449.438205 | 1.01432E-05 | 0.011424077 |
| 1126.319979 | 411.706312 | 9.29164E-06 | 0.010465358 |
| 1126.359979 | 384.728655 | 8.68279E-06 | 0.009779947 |
| 1126.399979 | 360.843437 | 8.14373E-06 | 0.009173102 |
| 1126.439979 | 310.662455 | 7.01122E-06 | 0.007897717 |
| 1126.479979 | 286.024378 | 6.45517E-06 | 0.007271622 |
| 1126.519979 | 266.971149 | 6.02517E-06 | 0.006787471 |
| 1126.559979 | 227.284195 | 5.12949E-06 | 0.005778676 |
| 1126.599979 | 222.698892 | 5.026E-06   | 0.005662296 |
| 1126.639979 | 248.112439 | 5.59955E-06 | 0.006308679 |
| 1126.679979 | 269.874767 | 6.0907E-06  | 0.006862267 |
| 1126.719979 | 261.76288  | 5.90762E-06 | 0.006656238 |
| 1126.759979 | 275.961379 | 6.22806E-06 | 0.007017533 |
| 1126.799979 | 296.567857 | 6.69312E-06 | 0.007541811 |
| 1126.839979 | 303.90927  | 6.85881E-06 | 0.00772878  |
| 1126.879979 | 304.499566 | 6.87213E-06 | 0.007744067 |
| 1126.919979 | 295.060675 | 6.65911E-06 | 0.007504282 |
| 1126.959979 | 287.878595 | 6.49702E-06 | 0.00732188  |
| 1126.999979 | 330.619856 | 7.46163E-06 | 0.008409256 |
| 1127.039979 | 378.927273 | 8.55186E-06 | 0.009638289 |

|             |            |             |             |
|-------------|------------|-------------|-------------|
| 1127.079979 | 395.594575 | 8.92802E-06 | 0.010062591 |
| 1127.119979 | 440.501857 | 9.94151E-06 | 0.011205278 |
| 1127.159979 | 505.96494  | 1.14189E-05 | 0.012870954 |
| 1127.199979 | 560.799724 | 1.26565E-05 | 0.014266371 |
| 1127.239979 | 585.190939 | 1.32069E-05 | 0.014887396 |
| 1127.279979 | 560.311828 | 1.26455E-05 | 0.014254971 |
| 1127.319979 | 509.487161 | 1.14984E-05 | 0.012962394 |
| 1127.359979 | 426.783832 | 9.63192E-06 | 0.010858637 |
| 1127.399979 | 336.756672 | 7.60013E-06 | 0.008568385 |
| 1127.439979 | 297.474698 | 6.71359E-06 | 0.007569169 |
| 1127.479979 | 280.45747  | 6.32953E-06 | 0.007136423 |
| 1127.519979 | 258.630246 | 5.83692E-06 | 0.006581249 |
| 1127.559979 | 241.668957 | 5.45413E-06 | 0.006149861 |
| 1127.599979 | 237.925405 | 5.36964E-06 | 0.006054812 |
| 1127.639979 | 237.197306 | 5.35321E-06 | 0.006036497 |
| 1127.679979 | 243.104454 | 5.48653E-06 | 0.006187049 |
| 1127.719979 | 255.735661 | 5.7716E-06  | 0.006508746 |
| 1127.759979 | 273.581948 | 6.17436E-06 | 0.0069632   |
| 1127.799979 | 287.263487 | 6.48314E-06 | 0.007311682 |
| 1127.839979 | 280.920491 | 6.33998E-06 | 0.007150488 |
| 1127.879979 | 241.908789 | 5.45954E-06 | 0.006157711 |
| 1127.919979 | 228.973323 | 5.16761E-06 | 0.005828649 |
| 1127.959979 | 257.051474 | 5.80129E-06 | 0.006543627 |
| 1127.999979 | 297.676745 | 6.71815E-06 | 0.007578073 |
| 1128.039979 | 331.911873 | 7.49079E-06 | 0.008449909 |
| 1128.079979 | 350.633229 | 7.9133E-06  | 0.008926839 |
| 1128.119979 | 385.170693 | 8.69277E-06 | 0.009806483 |
| 1128.159979 | 426.696454 | 9.62994E-06 | 0.010864118 |
| 1128.199979 | 437.898919 | 9.88277E-06 | 0.011149739 |
| 1128.239979 | 462.783662 | 1.04444E-05 | 0.01178377  |
| 1128.279979 | 466.479591 | 1.05278E-05 | 0.0118783   |
| 1128.319979 | 418.895211 | 9.45388E-06 | 0.010667003 |
| 1128.359979 | 339.390275 | 7.65957E-06 | 0.008642747 |
| 1128.399979 | 297.111284 | 6.70539E-06 | 0.007566359 |
| 1128.439979 | 294.162941 | 6.63885E-06 | 0.007491541 |
| 1128.479979 | 276.909356 | 6.24946E-06 | 0.007052389 |
| 1128.519979 | 259.740025 | 5.86197E-06 | 0.006615351 |
| 1128.559979 | 235.642006 | 5.31811E-06 | 0.006001808 |
| 1128.599979 | 241.912818 | 5.45964E-06 | 0.006161744 |
| 1128.639979 | 246.48945  | 5.56292E-06 | 0.006278538 |
| 1128.679979 | 265.788061 | 5.99847E-06 | 0.006770349 |
| 1128.719979 | 268.417426 | 6.05781E-06 | 0.006837568 |
| 1128.759979 | 255.095795 | 5.75716E-06 | 0.006498448 |
| 1128.799979 | 281.037897 | 6.34263E-06 | 0.007159565 |
| 1128.839979 | 301.149732 | 6.79653E-06 | 0.007672195 |
| 1128.879979 | 289.240093 | 6.52775E-06 | 0.007369042 |

|             |            |             |             |
|-------------|------------|-------------|-------------|
| 1128.919979 | 285.529856 | 6.44401E-06 | 0.007274773 |
| 1128.959979 | 293.842647 | 6.63162E-06 | 0.007486833 |
| 1128.999979 | 322.546298 | 7.27942E-06 | 0.008218466 |
| 1129.039979 | 360.565813 | 8.13747E-06 | 0.009187527 |
| 1129.079979 | 417.18495  | 9.41528E-06 | 0.010630608 |
| 1129.119979 | 456.092692 | 1.02934E-05 | 0.011622457 |
| 1129.159979 | 462.118728 | 1.04294E-05 | 0.011776434 |
| 1129.199979 | 495.972601 | 1.11934E-05 | 0.012639599 |
| 1129.239979 | 529.021421 | 1.19393E-05 | 0.013482308 |
| 1129.279979 | 512.514628 | 1.15667E-05 | 0.013062089 |
| 1129.319979 | 481.437382 | 1.08654E-05 | 0.012270481 |
| 1129.359979 | 410.644242 | 9.26767E-06 | 0.010466534 |
| 1129.399979 | 351.230432 | 7.92678E-06 | 0.008952507 |
| 1129.439979 | 316.721654 | 7.14797E-06 | 0.008073199 |
| 1129.479979 | 279.26239  | 6.30256E-06 | 0.007118619 |
| 1129.519979 | 242.727208 | 5.47801E-06 | 0.006187527 |
| 1129.559979 | 216.889271 | 4.89489E-06 | 0.00552907  |
| 1129.599979 | 229.477736 | 5.17899E-06 | 0.00585019  |
| 1129.639979 | 256.218681 | 5.7825E-06  | 0.006532142 |
| 1129.679979 | 264.229921 | 5.9633E-06  | 0.006736622 |
| 1129.719979 | 258.624803 | 5.8368E-06  | 0.006593951 |
| 1129.759979 | 256.040419 | 5.77848E-06 | 0.00652829  |
| 1129.799979 | 275.178303 | 6.21039E-06 | 0.0070165   |
| 1129.839979 | 274.258381 | 6.18963E-06 | 0.006993291 |
| 1129.879979 | 251.307644 | 5.67166E-06 | 0.006408299 |
| 1129.919979 | 267.806311 | 6.04402E-06 | 0.006829254 |
| 1129.959979 | 280.399982 | 6.32824E-06 | 0.007150655 |
| 1129.999979 | 273.453801 | 6.17147E-06 | 0.006973763 |
| 1130.039979 | 276.372246 | 6.23734E-06 | 0.00704844  |
| 1130.079979 | 297.096252 | 6.70505E-06 | 0.007577241 |
| 1130.119979 | 362.758142 | 8.18695E-06 | 0.009252231 |
| 1130.159979 | 424.2328   | 9.57434E-06 | 0.01082054  |
| 1130.199979 | 433.030574 | 9.7729E-06  | 0.011045328 |
| 1130.239979 | 433.170779 | 9.77606E-06 | 0.011049295 |
| 1130.279979 | 451.014107 | 1.01788E-05 | 0.011504849 |
| 1130.319979 | 448.061778 | 1.01121E-05 | 0.011429943 |
| 1130.359979 | 389.884449 | 8.79915E-06 | 0.009946206 |
| 1130.399979 | 357.1307   | 8.05994E-06 | 0.009110959 |
| 1130.439979 | 332.298812 | 7.49952E-06 | 0.008477759 |
| 1130.479979 | 280.237019 | 6.32456E-06 | 0.007149788 |
| 1130.519979 | 229.786724 | 5.18597E-06 | 0.005862839 |
| 1130.559979 | 216.274742 | 4.88102E-06 | 0.005518286 |
| 1130.599979 | 242.01257  | 5.46189E-06 | 0.006175209 |
| 1130.639979 | 277.278111 | 6.25778E-06 | 0.007075297 |
| 1130.679979 | 305.710842 | 6.89947E-06 | 0.00780109  |
| 1130.719979 | 297.214082 | 6.70771E-06 | 0.007584539 |

|             |            |             |             |
|-------------|------------|-------------|-------------|
| 1130.759979 | 278.579403 | 6.28715E-06 | 0.007109257 |
| 1130.799979 | 268.46614  | 6.05891E-06 | 0.006851412 |
| 1130.839979 | 268.804409 | 6.06654E-06 | 0.006860287 |
| 1130.879979 | 282.177289 | 6.36835E-06 | 0.007201838 |
| 1130.919979 | 303.82669  | 6.85695E-06 | 0.007754656 |
| 1130.959979 | 341.173493 | 7.69981E-06 | 0.008708178 |
| 1130.999979 | 343.818898 | 7.75951E-06 | 0.00877601  |
| 1131.039979 | 337.504167 | 7.617E-06   | 0.00861513  |
| 1131.079979 | 379.76823  | 8.57084E-06 | 0.009694306 |
| 1131.119979 | 417.319349 | 9.41832E-06 | 0.010653246 |
| 1131.159979 | 457.950182 | 1.03353E-05 | 0.011690875 |
| 1131.199979 | 523.255862 | 1.18092E-05 | 0.013358517 |
| 1131.239979 | 556.720338 | 1.25644E-05 | 0.014213355 |
| 1131.279979 | 511.787363 | 1.15503E-05 | 0.013066655 |
| 1131.319979 | 469.302327 | 1.05915E-05 | 0.011982375 |
| 1131.359979 | 433.779952 | 9.78981E-06 | 0.011075798 |
| 1131.399979 | 400.061769 | 9.02884E-06 | 0.010215226 |
| 1131.439979 | 349.928954 | 7.89741E-06 | 0.008935444 |
| 1131.479979 | 287.184263 | 6.48135E-06 | 0.007333516 |
| 1131.519979 | 264.289469 | 5.96465E-06 | 0.006749115 |
| 1131.559979 | 247.85398  | 5.59372E-06 | 0.006329629 |
| 1131.599979 | 239.010447 | 5.39413E-06 | 0.006104001 |
| 1131.639979 | 233.569276 | 5.27133E-06 | 0.005965251 |
| 1131.679979 | 251.855831 | 5.68404E-06 | 0.006432509 |
| 1131.719979 | 252.643387 | 5.70181E-06 | 0.006452852 |
| 1131.759979 | 251.436016 | 5.67456E-06 | 0.006422241 |
| 1131.799979 | 264.502265 | 5.96945E-06 | 0.006756221 |
| 1131.839979 | 260.357727 | 5.87591E-06 | 0.006650591 |
| 1131.879979 | 252.915897 | 5.70796E-06 | 0.006460725 |
| 1131.919979 | 254.871098 | 5.75209E-06 | 0.006510901 |
| 1131.959979 | 278.457085 | 6.28439E-06 | 0.007113676 |
| 1131.999979 | 301.341021 | 6.80085E-06 | 0.007698559 |
| 1132.039979 | 305.547269 | 6.89578E-06 | 0.007806294 |
| 1132.079979 | 303.13906  | 6.84143E-06 | 0.007745042 |
| 1132.119979 | 336.370401 | 7.59141E-06 | 0.008594389 |
| 1132.159979 | 396.642296 | 8.95166E-06 | 0.010134716 |
| 1132.199979 | 471.537267 | 1.06419E-05 | 0.012048803 |
| 1132.239979 | 487.113825 | 1.09935E-05 | 0.012447258 |
| 1132.279979 | 485.40915  | 1.0955E-05  | 0.012404137 |
| 1132.319979 | 451.194514 | 1.01828E-05 | 0.011530224 |
| 1132.359979 | 401.392784 | 9.05888E-06 | 0.010257909 |
| 1132.399979 | 357.833215 | 8.0758E-06  | 0.009145033 |
| 1132.439979 | 300.337502 | 6.7782E-06  | 0.007675904 |
| 1132.479979 | 259.408172 | 5.85448E-06 | 0.006630083 |
| 1132.519979 | 241.95912  | 5.46068E-06 | 0.00618433  |
| 1132.559979 | 230.237282 | 5.19613E-06 | 0.005884934 |

|             |            |             |             |
|-------------|------------|-------------|-------------|
| 1132.599979 | 234.326094 | 5.28841E-06 | 0.005989657 |
| 1132.639979 | 255.094819 | 5.75713E-06 | 0.006520761 |
| 1132.679979 | 261.384186 | 5.89908E-06 | 0.006681766 |
| 1132.719979 | 240.043676 | 5.41745E-06 | 0.006136455 |
| 1132.759979 | 245.753656 | 5.54632E-06 | 0.006282647 |
| 1132.799979 | 270.833934 | 6.11234E-06 | 0.006924064 |
| 1132.839979 | 284.721709 | 6.42577E-06 | 0.007279372 |
| 1132.879979 | 285.62516  | 6.44616E-06 | 0.007302728 |
| 1132.919979 | 271.530026 | 6.12805E-06 | 0.006942595 |
| 1132.959979 | 284.517886 | 6.42117E-06 | 0.007274931 |
| 1132.999979 | 315.407627 | 7.11831E-06 | 0.008065046 |
| 1133.039979 | 353.501918 | 7.97805E-06 | 0.009039445 |
| 1133.079979 | 428.461741 | 9.66978E-06 | 0.010956639 |
| 1133.119979 | 497.079578 | 1.12184E-05 | 0.012711786 |
| 1133.159979 | 512.814374 | 1.15735E-05 | 0.013114634 |
| 1133.199979 | 520.288481 | 1.17422E-05 | 0.013306245 |
| 1133.239979 | 529.980606 | 1.19609E-05 | 0.013554597 |
| 1133.279979 | 536.655461 | 1.21116E-05 | 0.013725796 |
| 1133.319979 | 510.688732 | 1.15255E-05 | 0.013062117 |
| 1133.359979 | 446.096103 | 1.00678E-05 | 0.011410405 |
| 1133.399979 | 373.711131 | 8.43414E-06 | 0.009559254 |
| 1133.439979 | 309.950582 | 6.99515E-06 | 0.007928586 |
| 1133.479979 | 287.651538 | 6.49189E-06 | 0.007358432 |
| 1133.519979 | 285.862999 | 6.45153E-06 | 0.007312938 |
| 1133.559979 | 262.119944 | 5.91568E-06 | 0.00670578  |
| 1133.599979 | 258.858719 | 5.84208E-06 | 0.006622583 |
| 1133.639979 | 276.248982 | 6.23455E-06 | 0.007067741 |
| 1133.679979 | 278.153069 | 6.27753E-06 | 0.007116707 |
| 1133.719979 | 280.896632 | 6.33945E-06 | 0.007187156 |
| 1133.759979 | 287.463495 | 6.48765E-06 | 0.007355439 |
| 1133.799979 | 291.850708 | 6.58666E-06 | 0.007467959 |
| 1133.839979 | 296.188231 | 6.68456E-06 | 0.007579217 |
| 1133.879979 | 278.576044 | 6.28707E-06 | 0.007128787 |
| 1133.919979 | 266.940409 | 6.02447E-06 | 0.006831271 |
| 1133.959979 | 243.183511 | 5.48831E-06 | 0.006223527 |
| 1133.999979 | 210.042749 | 4.74037E-06 | 0.005375582 |
| 1134.039979 | 223.611967 | 5.04661E-06 | 0.005723058 |
| 1134.079979 | 294.097719 | 6.63738E-06 | 0.007527315 |
| 1134.119979 | 385.719769 | 8.70516E-06 | 0.009872694 |
| 1134.159979 | 460.167139 | 1.03853E-05 | 0.011778627 |
| 1134.199979 | 480.179913 | 1.0837E-05  | 0.012291316 |
| 1134.239979 | 476.978843 | 1.07647E-05 | 0.012209808 |
| 1134.279979 | 465.276462 | 1.05006E-05 | 0.011910668 |
| 1134.319979 | 402.036429 | 9.0734E-06  | 0.010292141 |
| 1134.359979 | 363.250259 | 8.19805E-06 | 0.009299543 |
| 1134.399979 | 336.816688 | 7.60148E-06 | 0.008623123 |



|             |            |             |             |
|-------------|------------|-------------|-------------|
| 1134.439979 | 307.273212 | 6.93473E-06 | 0.007867033 |
| 1134.479979 | 281.933213 | 6.36284E-06 | 0.007218514 |
| 1134.519979 | 294.464929 | 6.64566E-06 | 0.007539638 |
| 1134.559979 | 315.681823 | 7.1245E-06  | 0.008083171 |
| 1134.599979 | 324.308785 | 7.3192E-06  | 0.008304361 |
| 1134.639979 | 336.676571 | 7.59832E-06 | 0.008621359 |
| 1134.679979 | 342.679755 | 7.7338E-06  | 0.008775393 |
| 1134.719979 | 336.33862  | 7.59069E-06 | 0.008613312 |
| 1134.759979 | 328.877599 | 7.42231E-06 | 0.00842254  |
| 1134.799979 | 315.644922 | 7.12367E-06 | 0.008083936 |
| 1134.839979 | 334.281361 | 7.54426E-06 | 0.008561533 |
| 1134.879979 | 333.186697 | 7.51956E-06 | 0.008533798 |
| 1134.919979 | 326.280548 | 7.3637E-06  | 0.008357207 |
| 1134.959979 | 331.17397  | 7.47414E-06 | 0.008482844 |
| 1134.999979 | 357.113791 | 8.05956E-06 | 0.009147601 |
| 1135.039979 | 416.211245 | 9.39331E-06 | 0.01066178  |
| 1135.079979 | 515.874327 | 1.16426E-05 | 0.013215242 |
| 1135.119979 | 582.632714 | 1.31492E-05 | 0.01492593  |
| 1135.159979 | 630.055765 | 1.42195E-05 | 0.016141386 |
| 1135.199979 | 681.976509 | 1.53913E-05 | 0.017472158 |
| 1135.239979 | 719.929898 | 1.62478E-05 | 0.018445169 |
| 1135.279979 | 695.925499 | 1.57061E-05 | 0.017830786 |
| 1135.319979 | 637.251232 | 1.43819E-05 | 0.016328027 |
| 1135.359979 | 563.906514 | 1.27266E-05 | 0.014449255 |
| 1135.399979 | 452.639743 | 1.02154E-05 | 0.01159862  |
| 1135.439979 | 356.280657 | 8.04076E-06 | 0.009129798 |
| 1135.479979 | 275.880573 | 6.22624E-06 | 0.007069771 |
| 1135.519979 | 238.80661  | 5.38953E-06 | 0.006119922 |
| 1135.559979 | 240.06363  | 5.4179E-06  | 0.006152352 |
| 1135.599979 | 234.635168 | 5.29539E-06 | 0.006013444 |
| 1135.639979 | 237.419642 | 5.35823E-06 | 0.006085021 |
| 1135.679979 | 270.381264 | 6.10213E-06 | 0.006930065 |
| 1135.719979 | 292.486643 | 6.60102E-06 | 0.007496906 |
| 1135.759979 | 289.740401 | 6.53904E-06 | 0.007426777 |
| 1135.799979 | 285.706244 | 6.44799E-06 | 0.007323629 |
| 1135.839979 | 290.109681 | 6.54737E-06 | 0.007436766 |
| 1135.879979 | 271.663792 | 6.13107E-06 | 0.006964164 |
| 1135.919979 | 245.688392 | 5.54484E-06 | 0.0062985   |
| 1135.959979 | 259.288522 | 5.85178E-06 | 0.006647389 |
| 1135.999979 | 323.7811   | 7.30729E-06 | 0.00830108  |
| 1136.039979 | 366.388279 | 8.26887E-06 | 0.00939377  |
| 1136.079979 | 398.20306  | 8.98689E-06 | 0.010209824 |
| 1136.119979 | 427.229389 | 9.64197E-06 | 0.010954437 |
| 1136.159979 | 468.978604 | 1.05842E-05 | 0.012025337 |
| 1136.199979 | 486.503211 | 1.09797E-05 | 0.012475135 |
| 1136.239979 | 484.28974  | 1.09297E-05 | 0.012418813 |

|             |            |             |             |
|-------------|------------|-------------|-------------|
| 1136.279979 | 452.983754 | 1.02232E-05 | 0.011616432 |
| 1136.319979 | 417.362035 | 9.41928E-06 | 0.010703316 |
| 1136.359979 | 386.957741 | 8.7331E-06  | 0.009923942 |
| 1136.399979 | 376.202629 | 8.49037E-06 | 0.009648456 |
| 1136.439979 | 351.712442 | 7.93766E-06 | 0.009020674 |
| 1136.479979 | 279.524898 | 6.30849E-06 | 0.00716947  |
| 1136.519979 | 238.795282 | 5.38928E-06 | 0.006125021 |
| 1136.559979 | 234.953704 | 5.30258E-06 | 0.006026698 |
| 1136.599979 | 224.981113 | 5.07751E-06 | 0.005771098 |
| 1136.639979 | 216.441886 | 4.88479E-06 | 0.00555225  |
| 1136.679979 | 241.388923 | 5.44781E-06 | 0.006192419 |
| 1136.719979 | 288.428642 | 6.50943E-06 | 0.007399402 |
| 1136.759979 | 319.875678 | 7.21915E-06 | 0.008206439 |
| 1136.799979 | 323.626648 | 7.3038E-06  | 0.008302963 |
| 1136.839979 | 288.907507 | 6.52024E-06 | 0.00741247  |
| 1136.879979 | 262.17976  | 5.91703E-06 | 0.006726955 |
| 1136.919979 | 264.724233 | 5.97446E-06 | 0.00679248  |
| 1136.959979 | 268.648951 | 6.06303E-06 | 0.006893425 |
| 1136.999979 | 284.008157 | 6.40967E-06 | 0.007287793 |
| 1137.039979 | 330.895725 | 7.46786E-06 | 0.00849125  |
| 1137.079979 | 389.780632 | 8.79681E-06 | 0.010002672 |
| 1137.119979 | 437.822908 | 9.88105E-06 | 0.011235943 |
| 1137.159979 | 497.889871 | 1.12367E-05 | 0.012777904 |
| 1137.199979 | 527.984234 | 1.19159E-05 | 0.013550726 |
| 1137.239979 | 550.521629 | 1.24245E-05 | 0.014129645 |
| 1137.279979 | 555.317169 | 1.25327E-05 | 0.014253229 |
| 1137.319979 | 527.810673 | 1.1912E-05  | 0.013547701 |
| 1137.359979 | 488.219492 | 1.10184E-05 | 0.012531926 |
| 1137.399979 | 404.855124 | 9.13702E-06 | 0.010392442 |
| 1137.439979 | 329.406402 | 7.43424E-06 | 0.008456006 |
| 1137.479979 | 289.396786 | 6.53128E-06 | 0.007429203 |
| 1137.519979 | 245.740452 | 5.54602E-06 | 0.006308708 |
| 1137.559979 | 212.715415 | 4.80069E-06 | 0.005461074 |
| 1137.599979 | 224.555044 | 5.06789E-06 | 0.005765237 |
| 1137.639979 | 264.713306 | 5.97421E-06 | 0.006796501 |
| 1137.679979 | 274.138749 | 6.18693E-06 | 0.007038746 |
| 1137.719979 | 255.15136  | 5.75841E-06 | 0.006551459 |
| 1137.759979 | 254.166592 | 5.73619E-06 | 0.006526403 |
| 1137.799979 | 301.785682 | 6.81088E-06 | 0.007749422 |
| 1137.839979 | 295.078017 | 6.6595E-06  | 0.007577445 |
| 1137.879979 | 256.509649 | 5.78907E-06 | 0.006587262 |
| 1137.919979 | 229.660701 | 5.18312E-06 | 0.005897978 |
| 1137.959979 | 217.321002 | 4.90463E-06 | 0.005581275 |
| 1137.999979 | 229.957953 | 5.18983E-06 | 0.005906027 |
| 1138.039979 | 277.313126 | 6.25857E-06 | 0.007122504 |
| 1138.079979 | 324.576178 | 7.32523E-06 | 0.0083367   |

|             |            |             |             |
|-------------|------------|-------------|-------------|
| 1138.119979 | 358.627533 | 8.09372E-06 | 0.009211629 |
| 1138.159979 | 411.371485 | 9.28408E-06 | 0.01056677  |
| 1138.199979 | 431.815622 | 9.74548E-06 | 0.011092302 |
| 1138.239979 | 442.755221 | 9.99237E-06 | 0.011373713 |
| 1138.279979 | 447.358661 | 1.00963E-05 | 0.011492373 |
| 1138.319979 | 413.47581  | 9.33157E-06 | 0.010622316 |
| 1138.359979 | 343.553852 | 7.75353E-06 | 0.00882631  |
| 1138.399979 | 284.332255 | 6.41698E-06 | 0.007305093 |
| 1138.439979 | 271.805067 | 6.13426E-06 | 0.006983489 |
| 1138.479979 | 263.653424 | 5.95029E-06 | 0.006774287 |
| 1138.519979 | 250.658001 | 5.657E-06   | 0.00644061  |
| 1138.559979 | 237.419256 | 5.35822E-06 | 0.006100657 |
| 1138.599979 | 225.308575 | 5.0849E-06  | 0.005789668 |
| 1138.639979 | 241.585176 | 5.45224E-06 | 0.006208139 |
| 1138.679979 | 261.97302  | 5.91237E-06 | 0.006732293 |
| 1138.719979 | 266.656032 | 6.01806E-06 | 0.00685288  |
| 1138.759979 | 251.660198 | 5.67962E-06 | 0.006467724 |
| 1138.799979 | 249.088543 | 5.62158E-06 | 0.006401857 |
| 1138.839979 | 262.570488 | 5.92585E-06 | 0.006748595 |
| 1138.879979 | 268.159007 | 6.05198E-06 | 0.006892473 |
| 1138.919979 | 253.010389 | 5.71009E-06 | 0.006503338 |
| 1138.959979 | 250.804991 | 5.66032E-06 | 0.006446877 |
| 1138.999979 | 262.531812 | 5.92498E-06 | 0.006748549 |
| 1139.039979 | 297.865928 | 6.72242E-06 | 0.007657104 |
| 1139.079979 | 355.364498 | 8.02008E-06 | 0.009135515 |
| 1139.119979 | 420.085371 | 9.48074E-06 | 0.010799702 |
| 1139.159979 | 475.358092 | 1.07282E-05 | 0.012221102 |
| 1139.199979 | 537.380076 | 1.21279E-05 | 0.013816126 |
| 1139.239979 | 566.805112 | 1.2792E-05  | 0.01457316  |
| 1139.279979 | 516.513418 | 1.1657E-05  | 0.013280574 |
| 1139.319979 | 439.676298 | 9.92288E-06 | 0.011305337 |
| 1139.359979 | 401.778473 | 9.06758E-06 | 0.010331238 |
| 1139.399979 | 373.880171 | 8.43795E-06 | 0.009614205 |
| 1139.439979 | 313.228804 | 7.06914E-06 | 0.008054858 |
| 1139.479979 | 244.235541 | 5.51206E-06 | 0.006280877 |
| 1139.519979 | 206.445216 | 4.65918E-06 | 0.00530923  |
| 1139.559979 | 196.406726 | 4.43263E-06 | 0.005051243 |
| 1139.599979 | 217.200414 | 4.90191E-06 | 0.005586217 |
| 1139.639979 | 249.675936 | 5.63484E-06 | 0.006421687 |
| 1139.679979 | 288.083183 | 6.50164E-06 | 0.007409785 |
| 1139.719979 | 278.004252 | 6.27417E-06 | 0.007150795 |
| 1139.759979 | 258.936486 | 5.84384E-06 | 0.00666057  |
| 1139.799979 | 271.873802 | 6.13581E-06 | 0.0069936   |
| 1139.839979 | 262.770326 | 5.93036E-06 | 0.006759662 |
| 1139.879979 | 254.593415 | 5.74582E-06 | 0.006549544 |
| 1139.919979 | 256.838885 | 5.7965E-06  | 0.006607541 |

|             |            |             |             |
|-------------|------------|-------------|-------------|
| 1139.959979 | 250.03524  | 5.64295E-06 | 0.006432734 |
| 1139.999979 | 262.518314 | 5.92467E-06 | 0.006754127 |
| 1140.039979 | 278.830471 | 6.29282E-06 | 0.007174061 |
| 1140.079979 | 327.204149 | 7.38454E-06 | 0.008418968 |
| 1140.119979 | 379.83739  | 8.5724E-06  | 0.009773565 |
| 1140.159979 | 370.066991 | 8.3519E-06  | 0.009522498 |
| 1140.199979 | 340.526657 | 7.68521E-06 | 0.008762679 |
| 1140.239979 | 336.13003  | 7.58599E-06 | 0.008649845 |
| 1140.279979 | 348.145416 | 7.85716E-06 | 0.008959359 |
| 1140.319979 | 380.459925 | 8.58645E-06 | 0.009791301 |
| 1140.359979 | 379.477949 | 8.56429E-06 | 0.009766372 |
| 1140.399979 | 355.576448 | 8.02487E-06 | 0.009151556 |
| 1140.439979 | 315.704045 | 7.125E-06   | 0.008125635 |
| 1140.479979 | 261.231446 | 5.89563E-06 | 0.006723848 |
| 1140.519979 | 233.664506 | 5.27348E-06 | 0.006014512 |
| 1140.559979 | 225.877737 | 5.09775E-06 | 0.005814285 |
| 1140.599979 | 219.778649 | 4.9601E-06  | 0.005657488 |
| 1140.639979 | 233.262511 | 5.26441E-06 | 0.006004796 |
| 1140.679979 | 243.278231 | 5.49045E-06 | 0.006262847 |
| 1140.719979 | 261.054116 | 5.89163E-06 | 0.006720698 |
| 1140.759979 | 283.373986 | 6.39536E-06 | 0.007295566 |
| 1140.799979 | 270.636503 | 6.10789E-06 | 0.00696788  |
| 1140.839979 | 250.349995 | 5.65005E-06 | 0.006445804 |
| 1140.879979 | 255.009714 | 5.75521E-06 | 0.006566008 |
| 1140.919979 | 247.782399 | 5.5921E-06  | 0.006380143 |
| 1140.959979 | 262.829772 | 5.9317E-06  | 0.006767834 |
| 1140.999979 | 280.766063 | 6.3365E-06  | 0.007229945 |
| 1141.039979 | 318.009458 | 7.17703E-06 | 0.008189279 |
| 1141.079979 | 355.766321 | 8.02915E-06 | 0.009161903 |
| 1141.119979 | 391.656475 | 8.83914E-06 | 0.010086521 |
| 1141.159979 | 462.080686 | 1.04285E-05 | 0.011900607 |
| 1141.199979 | 507.201199 | 1.14468E-05 | 0.013063116 |
| 1141.239979 | 499.012423 | 1.1262E-05  | 0.012852662 |
| 1141.279979 | 469.825603 | 1.06033E-05 | 0.012101345 |
| 1141.319979 | 457.070113 | 1.03154E-05 | 0.011773213 |
| 1141.359979 | 428.010281 | 9.6596E-06  | 0.011025076 |
| 1141.399979 | 382.748184 | 8.63809E-06 | 0.00985952  |
| 1141.439979 | 313.121478 | 7.06672E-06 | 0.008066232 |
| 1141.479979 | 246.039651 | 5.55277E-06 | 0.006338378 |
| 1141.519979 | 226.263306 | 5.10645E-06 | 0.005829112 |
| 1141.559979 | 223.090866 | 5.03485E-06 | 0.005747583 |
| 1141.599979 | 213.110254 | 4.8096E-06  | 0.005490641 |
| 1141.639979 | 210.67922  | 4.75474E-06 | 0.005428197 |
| 1141.679979 | 235.713035 | 5.31971E-06 | 0.006073412 |
| 1141.719979 | 262.291174 | 5.91955E-06 | 0.006758464 |
| 1141.759979 | 273.038207 | 6.16209E-06 | 0.00703563  |

|             |            |             |             |
|-------------|------------|-------------|-------------|
| 1141.799979 | 252.724214 | 5.70363E-06 | 0.006512409 |
| 1141.839979 | 231.158367 | 5.21692E-06 | 0.005956891 |
| 1141.879979 | 232.46978  | 5.24652E-06 | 0.005990895 |
| 1141.919979 | 229.93827  | 5.18939E-06 | 0.005925864 |
| 1141.959979 | 237.234249 | 5.35405E-06 | 0.006114107 |
| 1141.999979 | 259.984722 | 5.86749E-06 | 0.006700677 |
| 1142.039979 | 283.855759 | 6.40623E-06 | 0.00731617  |
| 1142.079979 | 317.542538 | 7.16649E-06 | 0.008184708 |
| 1142.119979 | 378.108123 | 8.53337E-06 | 0.009746137 |
| 1142.159979 | 407.631775 | 9.19968E-06 | 0.010507508 |
| 1142.199979 | 402.432726 | 9.08235E-06 | 0.010373856 |
| 1142.239979 | 376.922208 | 8.50661E-06 | 0.009716589 |
| 1142.279979 | 353.600521 | 7.98027E-06 | 0.009115704 |
| 1142.319979 | 344.334619 | 7.77115E-06 | 0.008877143 |
| 1142.359979 | 344.506777 | 7.77504E-06 | 0.008881892 |
| 1142.399979 | 325.747205 | 7.35166E-06 | 0.008398537 |
| 1142.439979 | 285.739436 | 6.44874E-06 | 0.0073673   |
| 1142.479979 | 258.714714 | 5.83883E-06 | 0.006670747 |
| 1142.519979 | 229.635553 | 5.18255E-06 | 0.005921172 |
| 1142.559979 | 206.774083 | 4.6666E-06  | 0.005331874 |
| 1142.599979 | 235.667017 | 5.31868E-06 | 0.006077119 |
| 1142.639979 | 297.422232 | 6.71241E-06 | 0.007669863 |
| 1142.679979 | 350.916427 | 7.91969E-06 | 0.009049677 |
| 1142.719979 | 348.793357 | 7.87178E-06 | 0.008995241 |
| 1142.759979 | 321.916    | 7.2652E-06  | 0.008302375 |
| 1142.799979 | 294.007411 | 6.63534E-06 | 0.007582864 |
| 1142.839979 | 275.644423 | 6.22091E-06 | 0.007109505 |
| 1142.879979 | 279.350747 | 6.30456E-06 | 0.007205352 |
| 1142.919979 | 297.068407 | 6.70442E-06 | 0.007662616 |
| 1142.959979 | 314.270998 | 7.09266E-06 | 0.008106625 |
| 1142.999979 | 310.214809 | 7.00112E-06 | 0.008002276 |
| 1143.039979 | 330.825666 | 7.46627E-06 | 0.00853425  |
| 1143.079979 | 406.745014 | 9.17967E-06 | 0.010493095 |
| 1143.119979 | 477.230276 | 1.07704E-05 | 0.012311885 |
| 1143.159979 | 526.195753 | 1.18755E-05 | 0.013575602 |
| 1143.199979 | 537.813945 | 1.21377E-05 | 0.013875832 |
| 1143.239979 | 544.662296 | 1.22923E-05 | 0.014053014 |
| 1143.279979 | 507.102782 | 1.14446E-05 | 0.013084386 |
| 1143.319979 | 460.469038 | 1.03921E-05 | 0.011881547 |
| 1143.359979 | 422.791833 | 9.54182E-06 | 0.010909738 |
| 1143.399979 | 358.811555 | 8.09788E-06 | 0.009259112 |
| 1143.439979 | 304.022511 | 6.86136E-06 | 0.007845559 |
| 1143.479979 | 282.956994 | 6.38595E-06 | 0.007302201 |
| 1143.519979 | 268.595476 | 6.06183E-06 | 0.006931819 |
| 1143.559979 | 250.612026 | 5.65596E-06 | 0.006467934 |
| 1143.599979 | 247.809008 | 5.5927E-06  | 0.006395816 |

|             |            |             |             |
|-------------|------------|-------------|-------------|
| 1143.639979 | 250.385949 | 5.65086E-06 | 0.006462552 |
| 1143.679979 | 264.021355 | 5.95859E-06 | 0.006814725 |
| 1143.719979 | 269.397129 | 6.07992E-06 | 0.006953724 |
| 1143.759979 | 254.105658 | 5.73481E-06 | 0.006559247 |
| 1143.799979 | 250.248925 | 5.64777E-06 | 0.006459919 |
| 1143.839979 | 277.6714   | 6.26666E-06 | 0.007168053 |
| 1143.879979 | 278.161945 | 6.27773E-06 | 0.007180967 |
| 1143.919979 | 286.140949 | 6.4578E-06  | 0.007387209 |
| 1143.959979 | 308.729798 | 6.9676E-06  | 0.007970657 |
| 1143.999979 | 307.32401  | 6.93587E-06 | 0.007934641 |
| 1144.039979 | 299.005192 | 6.74813E-06 | 0.007720131 |
| 1144.079979 | 333.516636 | 7.52701E-06 | 0.008611497 |
| 1144.119979 | 372.112445 | 8.39806E-06 | 0.009608388 |
| 1144.159979 | 434.033454 | 9.79553E-06 | 0.011207654 |
| 1144.199979 | 478.311968 | 1.07948E-05 | 0.01235145  |
| 1144.239979 | 507.457759 | 1.14526E-05 | 0.01310454  |
| 1144.279979 | 568.406312 | 1.28281E-05 | 0.014678982 |
| 1144.319979 | 557.712515 | 1.25868E-05 | 0.014403321 |
| 1144.359979 | 474.856818 | 1.07169E-05 | 0.012263942 |
| 1144.399979 | 398.607129 | 8.99601E-06 | 0.010295031 |
| 1144.439979 | 343.898589 | 7.76131E-06 | 0.008882356 |
| 1144.479979 | 283.664165 | 6.40191E-06 | 0.007326852 |
| 1144.519979 | 247.152343 | 5.57788E-06 | 0.006384    |
| 1144.559979 | 238.348166 | 5.37919E-06 | 0.006156801 |
| 1144.599979 | 266.482028 | 6.01413E-06 | 0.006883771 |
| 1144.639979 | 297.781326 | 6.72051E-06 | 0.007692564 |
| 1144.679979 | 336.75118  | 7.60001E-06 | 0.008699574 |
| 1144.719979 | 368.575866 | 8.31824E-06 | 0.00952206  |
| 1144.759979 | 391.307943 | 8.83128E-06 | 0.01010969  |
| 1144.799979 | 424.63797  | 9.58349E-06 | 0.010971176 |
| 1144.839979 | 417.675716 | 9.42636E-06 | 0.010791673 |
| 1144.879979 | 374.072001 | 8.44228E-06 | 0.009665402 |
| 1144.919979 | 327.702599 | 7.39579E-06 | 0.008467589 |
| 1144.959979 | 313.601784 | 7.07756E-06 | 0.008103518 |
| 1144.999979 | 324.084698 | 7.31414E-06 | 0.00837469  |
| 1145.039979 | 325.795277 | 7.35275E-06 | 0.008419188 |
| 1145.079979 | 371.587469 | 8.38621E-06 | 0.009602883 |
| 1145.119979 | 452.487733 | 1.0212E-05  | 0.011693986 |
| 1145.159979 | 538.103039 | 1.21442E-05 | 0.013907093 |
| 1145.199979 | 601.500135 | 1.3575E-05  | 0.015546113 |
| 1145.239979 | 618.512558 | 1.3959E-05  | 0.015986367 |
| 1145.279979 | 623.953807 | 1.40818E-05 | 0.016127567 |
| 1145.319979 | 612.714089 | 1.38281E-05 | 0.015837603 |
| 1145.359979 | 539.967336 | 1.21863E-05 | 0.013957713 |
| 1145.399979 | 420.188112 | 9.48306E-06 | 0.010861897 |
| 1145.439979 | 319.767017 | 7.2167E-06  | 0.008266292 |

|             |            |             |             |
|-------------|------------|-------------|-------------|
| 1145.479979 | 249.190906 | 5.62389E-06 | 0.006442055 |
| 1145.519979 | 218.12468  | 4.92277E-06 | 0.005639132 |
| 1145.559979 | 227.119096 | 5.12576E-06 | 0.005871867 |
| 1145.599979 | 240.865329 | 5.43599E-06 | 0.006227476 |
| 1145.639979 | 255.081921 | 5.75684E-06 | 0.00659527  |
| 1145.679979 | 281.142012 | 6.34498E-06 | 0.007269321 |
| 1145.719979 | 317.376275 | 7.16274E-06 | 0.008206495 |
| 1145.759979 | 307.10581  | 6.93095E-06 | 0.007941206 |
| 1145.799979 | 293.584528 | 6.62579E-06 | 0.007591834 |
| 1145.839979 | 279.756975 | 6.31373E-06 | 0.007234519 |
| 1145.879979 | 283.813863 | 6.40528E-06 | 0.007339686 |
| 1145.919979 | 295.809253 | 6.676E-06   | 0.007650165 |
| 1145.959979 | 306.766827 | 6.9233E-06  | 0.007933825 |
| 1145.999979 | 313.109872 | 7.06645E-06 | 0.008098156 |
| 1146.039979 | 300.577436 | 6.78361E-06 | 0.007774293 |
| 1146.079979 | 317.041828 | 7.15519E-06 | 0.008200423 |
| 1146.119979 | 360.711145 | 8.14075E-06 | 0.009330274 |
| 1146.159979 | 414.045124 | 9.34442E-06 | 0.010710202 |
| 1146.199979 | 450.739234 | 1.01726E-05 | 0.011659784 |
| 1146.239979 | 453.625755 | 1.02377E-05 | 0.011734863 |
| 1146.279979 | 468.831564 | 1.05809E-05 | 0.012128646 |
| 1146.319979 | 487.456688 | 1.10012E-05 | 0.012610917 |
| 1146.359979 | 451.301738 | 1.01853E-05 | 0.011675965 |
| 1146.399979 | 384.745401 | 8.68317E-06 | 0.009954383 |
| 1146.439979 | 323.57125  | 7.30255E-06 | 0.008371938 |
| 1146.479979 | 260.23056  | 5.87304E-06 | 0.006733324 |
| 1146.519979 | 233.274845 | 5.26469E-06 | 0.00603607  |
| 1146.559979 | 258.21687  | 5.8276E-06  | 0.006681687 |
| 1146.599979 | 279.967351 | 6.31847E-06 | 0.007244761 |
| 1146.639979 | 291.424196 | 6.57704E-06 | 0.007541495 |
| 1146.679979 | 321.547107 | 7.25687E-06 | 0.008321308 |
| 1146.719979 | 332.691494 | 7.50838E-06 | 0.008610014 |
| 1146.759979 | 300.568054 | 6.7834E-06  | 0.007778934 |
| 1146.799979 | 277.595149 | 6.26494E-06 | 0.007184628 |
| 1146.839979 | 284.539943 | 6.42167E-06 | 0.007364628 |
| 1146.879979 | 295.944057 | 6.67905E-06 | 0.007660063 |
| 1146.919979 | 302.843844 | 6.83476E-06 | 0.007838927 |
| 1146.959979 | 294.406076 | 6.64434E-06 | 0.007620786 |
| 1146.999979 | 277.62859  | 6.26569E-06 | 0.007186747 |
| 1147.039979 | 306.100267 | 6.90826E-06 | 0.007924047 |
| 1147.079979 | 363.831186 | 8.21116E-06 | 0.009418861 |
| 1147.119979 | 422.138106 | 9.52707E-06 | 0.010928691 |
| 1147.159979 | 457.966864 | 1.03357E-05 | 0.011856672 |
| 1147.199979 | 498.193231 | 1.12435E-05 | 0.012898574 |
| 1147.239979 | 510.523384 | 1.15218E-05 | 0.013218272 |
| 1147.279979 | 498.511103 | 1.12507E-05 | 0.012907704 |

|             |            |             |             |
|-------------|------------|-------------|-------------|
| 1147.319979 | 474.012731 | 1.06978E-05 | 0.012273808 |
| 1147.359979 | 420.727138 | 9.49523E-06 | 0.010894442 |
| 1147.399979 | 361.183423 | 8.15141E-06 | 0.009352924 |
| 1147.439979 | 315.36506  | 7.11735E-06 | 0.008166732 |
| 1147.479979 | 288.830215 | 6.5185E-06  | 0.007479843 |
| 1147.519979 | 273.273634 | 6.16741E-06 | 0.007077221 |
| 1147.559979 | 255.54011  | 5.76718E-06 | 0.00661819  |
| 1147.599979 | 252.391938 | 5.69613E-06 | 0.006536884 |
| 1147.639979 | 262.97693  | 5.93502E-06 | 0.00681127  |
| 1147.679979 | 253.308192 | 5.71681E-06 | 0.006561072 |
| 1147.719979 | 237.264089 | 5.35472E-06 | 0.006145719 |
| 1147.759979 | 253.000963 | 5.70988E-06 | 0.006553571 |
| 1147.799979 | 254.901291 | 5.75277E-06 | 0.006603026 |
| 1147.839979 | 253.237029 | 5.71521E-06 | 0.006560143 |
| 1147.879979 | 239.984095 | 5.41611E-06 | 0.006217041 |
| 1147.919979 | 242.395177 | 5.47052E-06 | 0.006279721 |
| 1147.959979 | 259.040699 | 5.84619E-06 | 0.00671119  |
| 1147.999979 | 263.80253  | 5.95366E-06 | 0.006834797 |
| 1148.039979 | 294.45671  | 6.64548E-06 | 0.007629274 |
| 1148.079979 | 329.550577 | 7.4375E-06  | 0.008538842 |
| 1148.119979 | 376.39228  | 8.49465E-06 | 0.009752877 |
| 1148.159979 | 427.523438 | 9.64861E-06 | 0.011078146 |
| 1148.199979 | 451.063137 | 1.01799E-05 | 0.011688523 |
| 1148.239979 | 473.39089  | 1.06838E-05 | 0.012267535 |
| 1148.279979 | 460.422563 | 1.03911E-05 | 0.011931887 |
| 1148.319979 | 383.395201 | 8.6527E-06  | 0.009936063 |
| 1148.359979 | 311.908173 | 7.03933E-06 | 0.008083688 |
| 1148.399979 | 274.041487 | 6.18473E-06 | 0.007102549 |
| 1148.439979 | 231.341182 | 5.22105E-06 | 0.005996061 |
| 1148.479979 | 212.165071 | 4.78827E-06 | 0.005499232 |
| 1148.519979 | 209.39369  | 4.72572E-06 | 0.005427588 |
| 1148.559979 | 214.502886 | 4.84103E-06 | 0.005560215 |
| 1148.599979 | 227.524995 | 5.13492E-06 | 0.005897972 |
| 1148.639979 | 256.150846 | 5.78097E-06 | 0.006640251 |
| 1148.679979 | 269.4741   | 6.08166E-06 | 0.006985875 |
| 1148.719979 | 272.032918 | 6.1394E-06  | 0.007052456 |
| 1148.759979 | 277.228616 | 6.25666E-06 | 0.007187405 |
| 1148.799979 | 273.465854 | 6.17174E-06 | 0.007090099 |
| 1148.839979 | 281.429627 | 6.35147E-06 | 0.007296828 |
| 1148.879979 | 279.397607 | 6.30561E-06 | 0.007244395 |
| 1148.919979 | 277.910515 | 6.27205E-06 | 0.007206087 |
| 1148.959979 | 287.592553 | 6.49056E-06 | 0.007457398 |
| 1148.999979 | 306.743644 | 6.92278E-06 | 0.00795427  |
| 1149.039979 | 317.996109 | 7.17673E-06 | 0.008246349 |
| 1149.079979 | 342.977095 | 7.74052E-06 | 0.008894471 |
| 1149.119979 | 401.528154 | 9.06193E-06 | 0.010413246 |



|             |            |             |             |
|-------------|------------|-------------|-------------|
| 1149.159979 | 452.698118 | 1.02168E-05 | 0.011740699 |
| 1149.199979 | 473.958753 | 1.06966E-05 | 0.01229252  |
| 1149.239979 | 484.008069 | 1.09234E-05 | 0.012553594 |
| 1149.279979 | 468.571402 | 1.0575E-05  | 0.01215364  |
| 1149.319979 | 420.849038 | 9.49798E-06 | 0.010916214 |
| 1149.359979 | 360.541622 | 8.13692E-06 | 0.009352253 |
| 1149.399979 | 316.092067 | 7.13376E-06 | 0.008199541 |
| 1149.439979 | 272.487137 | 6.14966E-06 | 0.007068659 |
| 1149.479979 | 235.001744 | 5.30366E-06 | 0.006096453 |
| 1149.519979 | 204.531431 | 4.61599E-06 | 0.005306172 |
| 1149.559979 | 201.574203 | 4.54925E-06 | 0.005229635 |
| 1149.599979 | 219.661692 | 4.95746E-06 | 0.005699094 |
| 1149.639979 | 232.813387 | 5.25427E-06 | 0.006040523 |
| 1149.679979 | 252.175324 | 5.69125E-06 | 0.006543111 |
| 1149.719979 | 270.252981 | 6.09923E-06 | 0.00701241  |
| 1149.759979 | 264.389642 | 5.96691E-06 | 0.00686051  |
| 1149.799979 | 262.983158 | 5.93516E-06 | 0.006824251 |
| 1149.839979 | 243.266147 | 5.49018E-06 | 0.006312826 |
| 1149.879979 | 231.643718 | 5.22788E-06 | 0.00601143  |
| 1149.919979 | 219.752723 | 4.95951E-06 | 0.005703043 |
| 1149.959979 | 221.170564 | 4.99151E-06 | 0.005740039 |
| 1149.999979 | 245.88116  | 5.5492E-06  | 0.006381574 |
| 1150.039979 | 274.695863 | 6.1995E-06  | 0.007129676 |
| 1150.079979 | 328.60456  | 7.41615E-06 | 0.008529162 |
| 1150.119979 | 378.571705 | 8.54384E-06 | 0.009826437 |
| 1150.159979 | 424.336087 | 9.57667E-06 | 0.011014708 |
| 1150.199979 | 463.771862 | 1.04667E-05 | 0.012038781 |
| 1150.239979 | 438.154921 | 9.88855E-06 | 0.011374201 |
| 1150.279979 | 392.119465 | 8.84959E-06 | 0.010179506 |
| 1150.319979 | 380.278169 | 8.58235E-06 | 0.009872447 |
| 1150.359979 | 339.574718 | 7.66373E-06 | 0.008816046 |
| 1150.399979 | 278.819434 | 6.29257E-06 | 0.007238968 |
| 1150.439979 | 264.190378 | 5.96241E-06 | 0.006859394 |
| 1150.479979 | 256.854904 | 5.79686E-06 | 0.006669168 |
| 1150.519979 | 244.899944 | 5.52705E-06 | 0.006358982 |
| 1150.559979 | 239.639764 | 5.40834E-06 | 0.006222615 |
| 1150.599979 | 254.833419 | 5.75124E-06 | 0.006617371 |
| 1150.639979 | 286.500088 | 6.46591E-06 | 0.007439932 |
| 1150.679979 | 322.154265 | 7.27057E-06 | 0.008366103 |
| 1150.719979 | 358.547417 | 8.09192E-06 | 0.009311529 |
| 1150.759979 | 352.858442 | 7.96352E-06 | 0.009164104 |
| 1150.799979 | 310.81171  | 7.01459E-06 | 0.008072387 |
| 1150.839979 | 291.580867 | 6.58057E-06 | 0.007573188 |
| 1150.879979 | 287.576122 | 6.49019E-06 | 0.007469433 |
| 1150.919979 | 290.842174 | 6.5639E-06  | 0.007554527 |
| 1150.959979 | 295.410603 | 6.66701E-06 | 0.007673457 |

|             |            |             |             |
|-------------|------------|-------------|-------------|
| 1150.999979 | 326.642666 | 7.37187E-06 | 0.008485022 |
| 1151.039979 | 354.414592 | 7.99864E-06 | 0.009206759 |
| 1151.079979 | 369.33559  | 8.33539E-06 | 0.0095947   |
| 1151.119979 | 366.8999   | 8.28042E-06 | 0.009531757 |
| 1151.159979 | 392.293201 | 8.85351E-06 | 0.010191808 |
| 1151.199979 | 458.016443 | 1.03368E-05 | 0.011899716 |
| 1151.239979 | 485.07877  | 1.09476E-05 | 0.01260326  |
| 1151.279979 | 481.292365 | 1.08621E-05 | 0.012505316 |
| 1151.319979 | 451.626332 | 1.01926E-05 | 0.011734918 |
| 1151.359979 | 406.259213 | 9.1687E-06  | 0.010556479 |
| 1151.399979 | 351.25714  | 7.92738E-06 | 0.00912759  |
| 1151.439979 | 282.544934 | 6.37665E-06 | 0.007342325 |
| 1151.479979 | 228.265306 | 5.15163E-06 | 0.005931999 |
| 1151.519979 | 235.529286 | 5.31557E-06 | 0.006120983 |
| 1151.559979 | 252.06844  | 5.68883E-06 | 0.006551033 |
| 1151.599979 | 234.620102 | 5.29505E-06 | 0.006097778 |
| 1151.639979 | 225.097592 | 5.08014E-06 | 0.005850491 |
| 1151.679979 | 232.823827 | 5.25451E-06 | 0.006051513 |
| 1151.719979 | 250.798461 | 5.66017E-06 | 0.006518933 |
| 1151.759979 | 281.208282 | 6.34648E-06 | 0.007309621 |
| 1151.799979 | 275.838952 | 6.2253E-06  | 0.007170301 |
| 1151.839979 | 248.291795 | 5.6036E-06  | 0.00645445  |
| 1151.879979 | 253.894101 | 5.73004E-06 | 0.006600314 |
| 1151.919979 | 268.439212 | 6.0583E-06  | 0.006978676 |
| 1151.959979 | 261.514777 | 5.90202E-06 | 0.006798896 |
| 1151.999979 | 272.945471 | 6.16E-06    | 0.007096319 |
| 1152.039979 | 298.825679 | 6.74408E-06 | 0.007769449 |
| 1152.079979 | 315.237115 | 7.11446E-06 | 0.00819643  |
| 1152.119979 | 353.573775 | 7.97967E-06 | 0.009193534 |
| 1152.159979 | 397.307807 | 8.96668E-06 | 0.010331054 |
| 1152.199979 | 413.643107 | 9.33535E-06 | 0.010756189 |
| 1152.239979 | 404.43861  | 9.12762E-06 | 0.010517204 |
| 1152.279979 | 410.615885 | 9.26703E-06 | 0.010678212 |
| 1152.319979 | 423.230624 | 9.55173E-06 | 0.011006644 |
| 1152.359979 | 402.788592 | 9.09038E-06 | 0.010475387 |
| 1152.399979 | 367.873047 | 8.30238E-06 | 0.009567665 |
| 1152.439979 | 344.39384  | 7.77249E-06 | 0.008957327 |
| 1152.479979 | 322.680221 | 7.28244E-06 | 0.00839287  |
| 1152.519979 | 315.602575 | 7.12271E-06 | 0.008209066 |
| 1152.559979 | 310.927274 | 7.0172E-06  | 0.008087739 |
| 1152.599979 | 313.407358 | 7.07317E-06 | 0.008152533 |
| 1152.639979 | 335.781225 | 7.57811E-06 | 0.008734838 |
| 1152.679979 | 345.127196 | 7.78904E-06 | 0.008978271 |
| 1152.719979 | 383.394955 | 8.65269E-06 | 0.009974129 |
| 1152.759979 | 430.070939 | 9.7061E-06  | 0.011188806 |
| 1152.799979 | 477.898841 | 1.07855E-05 | 0.012433537 |

|             |             |             |             |
|-------------|-------------|-------------|-------------|
| 1152.839979 | 543.34952   | 1.22626E-05 | 0.014136864 |
| 1152.879979 | 622.310207  | 1.40447E-05 | 0.016191824 |
| 1152.919979 | 695.895716  | 1.57054E-05 | 0.018107066 |
| 1152.959979 | 775.401655  | 1.74997E-05 | 0.020176494 |
| 1152.999979 | 867.122085  | 1.95697E-05 | 0.022563907 |
| 1153.039979 | 1007.112046 | 2.27291E-05 | 0.02620758  |
| 1153.079979 | 1196.463213 | 2.70025E-05 | 0.031136052 |
| 1153.119979 | 1399.597827 | 3.1587E-05  | 0.03642357  |
| 1153.159979 | 1680.604953 | 3.79289E-05 | 0.043738104 |
| 1153.199979 | 2058.061968 | 4.64476E-05 | 0.053563362 |
| 1153.239979 | 2425.494203 | 5.474E-05   | 0.063128386 |
| 1153.279979 | 2615.776777 | 5.90344E-05 | 0.068083236 |
| 1153.319979 | 2584.090789 | 5.83193E-05 | 0.067260848 |
| 1153.359979 | 2235.347158 | 5.04487E-05 | 0.058185479 |
| 1153.399979 | 1696.577157 | 3.82894E-05 | 0.044162974 |
| 1153.439979 | 1139.78201  | 2.57233E-05 | 0.029670274 |
| 1153.479979 | 730.099461  | 1.64773E-05 | 0.019006268 |
| 1153.519979 | 479.389965  | 1.08192E-05 | 0.012480122 |
| 1153.559979 | 351.402501  | 7.93066E-06 | 0.009148498 |
| 1153.599979 | 299.749365  | 6.76493E-06 | 0.007804018 |
| 1153.639979 | 280.222637  | 6.32423E-06 | 0.00729589  |
| 1153.679979 | 285.477368  | 6.44283E-06 | 0.00743296  |
| 1153.719979 | 335.168654  | 7.56429E-06 | 0.008727072 |
| 1153.759979 | 372.438623  | 8.40542E-06 | 0.009697838 |
| 1153.799979 | 384.565686  | 8.67911E-06 | 0.010013959 |
| 1153.839979 | 364.120201  | 8.21769E-06 | 0.009481894 |
| 1153.879979 | 369.40826   | 8.33703E-06 | 0.009619932 |
| 1153.919979 | 416.583568  | 9.40171E-06 | 0.010848822 |
| 1153.959979 | 434.053399  | 9.79598E-06 | 0.01130417  |
| 1153.999979 | 482.24849   | 1.08837E-05 | 0.012559763 |
| 1154.039979 | 577.702234  | 1.30379E-05 | 0.015046298 |
| 1154.079979 | 664.361467  | 1.49937E-05 | 0.017303944 |
| 1154.119979 | 783.726088  | 1.76876E-05 | 0.02041362  |
| 1154.159979 | 957.269572  | 2.16042E-05 | 0.02493475  |
| 1154.199979 | 1122.538438 | 2.53341E-05 | 0.029240651 |
| 1154.239979 | 1281.582652 | 2.89235E-05 | 0.033384701 |
| 1154.279979 | 1391.900038 | 3.14132E-05 | 0.03625968  |
| 1154.319979 | 1359.772555 | 3.06882E-05 | 0.035423971 |
| 1154.359979 | 1213.102515 | 2.7378E-05  | 0.031604107 |
| 1154.399979 | 970.643282  | 2.19061E-05 | 0.025288363 |
| 1154.439979 | 725.100421  | 1.63645E-05 | 0.018891841 |
| 1154.479979 | 511.110852  | 1.15351E-05 | 0.013316996 |
| 1154.519979 | 343.209659  | 7.74576E-06 | 0.008942639 |
| 1154.559979 | 250.958696  | 5.66379E-06 | 0.006539183 |
| 1154.599979 | 233.670185  | 5.27361E-06 | 0.006088911 |
| 1154.639979 | 238.001947  | 5.37137E-06 | 0.006202001 |

|             |            |             |             |
|-------------|------------|-------------|-------------|
| 1154.679979 | 250.166655 | 5.64591E-06 | 0.006519223 |
| 1154.719979 | 258.436294 | 5.83255E-06 | 0.006734959 |
| 1154.759979 | 272.993903 | 6.16109E-06 | 0.007114583 |
| 1154.799979 | 308.730289 | 6.96761E-06 | 0.008046199 |
| 1154.839979 | 327.506646 | 7.39137E-06 | 0.008535848 |
| 1154.879979 | 316.12314  | 7.13446E-06 | 0.008239444 |
| 1154.919979 | 303.648044 | 6.85291E-06 | 0.007914567 |
| 1154.959979 | 332.787756 | 7.51056E-06 | 0.008674392 |
| 1154.999979 | 366.835    | 8.27895E-06 | 0.009562193 |
| 1155.039979 | 405.482232 | 9.15117E-06 | 0.010569966 |
| 1155.079979 | 466.897316 | 1.05372E-05 | 0.012171334 |
| 1155.119979 | 543.752693 | 1.22717E-05 | 0.014175333 |
| 1155.159979 | 687.810156 | 1.55229E-05 | 0.017931453 |
| 1155.199979 | 800.60911  | 1.80686E-05 | 0.020872884 |
| 1155.239979 | 846.682078 | 1.91084E-05 | 0.022074828 |
| 1155.279979 | 839.090918 | 1.89371E-05 | 0.021877668 |
| 1155.319979 | 787.066695 | 1.7763E-05  | 0.020521948 |
| 1155.359979 | 697.93484  | 1.57514E-05 | 0.018198557 |
| 1155.399979 | 560.096878 | 1.26406E-05 | 0.014604956 |
| 1155.439979 | 430.874529 | 9.72424E-06 | 0.011235773 |
| 1155.479979 | 335.433114 | 7.57026E-06 | 0.008747282 |
| 1155.519979 | 267.408534 | 6.03504E-06 | 0.006973607 |
| 1155.559979 | 254.722899 | 5.74874E-06 | 0.006643015 |
| 1155.599979 | 280.643132 | 6.33372E-06 | 0.007319252 |
| 1155.639979 | 285.728457 | 6.44849E-06 | 0.007452137 |
| 1155.679979 | 279.853481 | 6.3159E-06  | 0.007299163 |
| 1155.719979 | 282.606302 | 6.37803E-06 | 0.007371217 |
| 1155.759979 | 286.75051  | 6.47156E-06 | 0.00747957  |
| 1155.799979 | 301.229187 | 6.79832E-06 | 0.007857502 |
| 1155.839979 | 297.227666 | 6.70801E-06 | 0.007753391 |
| 1155.879979 | 268.870858 | 6.06804E-06 | 0.007013927 |
| 1155.919979 | 257.208569 | 5.80484E-06 | 0.00670993  |
| 1155.959979 | 258.284084 | 5.82911E-06 | 0.00673822  |
| 1155.999979 | 281.09275  | 6.34387E-06 | 0.007333516 |
| 1156.039979 | 316.034105 | 7.13245E-06 | 0.008245397 |
| 1156.079979 | 343.713286 | 7.75713E-06 | 0.008967863 |
| 1156.119979 | 384.653052 | 8.68108E-06 | 0.010036374 |
| 1156.159979 | 445.355338 | 1.0051E-05  | 0.011620621 |
| 1156.199979 | 476.403605 | 1.07518E-05 | 0.012431191 |
| 1156.239979 | 498.622106 | 1.12532E-05 | 0.013011407 |
| 1156.279979 | 518.38779  | 1.16993E-05 | 0.013527655 |
| 1156.319979 | 483.627594 | 1.09148E-05 | 0.012621003 |
| 1156.359979 | 434.446447 | 9.80485E-06 | 0.011337937 |
| 1156.399979 | 381.416654 | 8.60804E-06 | 0.00995434  |
| 1156.439979 | 319.5739   | 7.21234E-06 | 0.008340636 |
| 1156.479979 | 255.933187 | 5.77606E-06 | 0.006679893 |

|             |            |             |             |
|-------------|------------|-------------|-------------|
| 1156.519979 | 234.896261 | 5.30128E-06 | 0.006131038 |
| 1156.559979 | 241.44787  | 5.44914E-06 | 0.00630226  |
| 1156.599979 | 253.788827 | 5.72766E-06 | 0.006624612 |
| 1156.639979 | 285.06537  | 6.43353E-06 | 0.007441276 |
| 1156.679979 | 283.307701 | 6.39386E-06 | 0.00739565  |
| 1156.719979 | 279.8927   | 6.31679E-06 | 0.007306755 |
| 1156.759979 | 289.370004 | 6.53068E-06 | 0.007554427 |
| 1156.799979 | 286.148412 | 6.45797E-06 | 0.007470581 |
| 1156.839979 | 250.481795 | 5.65303E-06 | 0.006539646 |
| 1156.879979 | 258.450126 | 5.83286E-06 | 0.006747918 |
| 1156.919979 | 280.952825 | 6.34071E-06 | 0.007335699 |
| 1156.959979 | 293.240487 | 6.61803E-06 | 0.007656795 |
| 1156.999979 | 321.929887 | 7.26551E-06 | 0.008406194 |
| 1157.039979 | 350.267778 | 7.90506E-06 | 0.009146466 |
| 1157.079979 | 382.621986 | 8.63525E-06 | 0.009991669 |
| 1157.119979 | 422.888557 | 9.54401E-06 | 0.01104356  |
| 1157.159979 | 449.061731 | 1.01347E-05 | 0.011727467 |
| 1157.199979 | 504.214498 | 1.13794E-05 | 0.013168263 |
| 1157.239979 | 539.153588 | 1.21679E-05 | 0.014081233 |
| 1157.279979 | 542.882601 | 1.22521E-05 | 0.014179115 |
| 1157.319979 | 499.42292  | 1.12713E-05 | 0.013044477 |
| 1157.359979 | 427.078897 | 9.63858E-06 | 0.011155302 |
| 1157.399979 | 374.982873 | 8.46284E-06 | 0.009794892 |
| 1157.439979 | 329.559332 | 7.4377E-06  | 0.008608686 |
| 1157.479979 | 267.111903 | 6.02834E-06 | 0.006977687 |
| 1157.519979 | 235.655853 | 5.31842E-06 | 0.006156182 |
| 1157.559979 | 240.606716 | 5.43016E-06 | 0.006285734 |
| 1157.599979 | 219.044452 | 4.94353E-06 | 0.005722628 |
| 1157.639979 | 210.262246 | 4.74533E-06 | 0.005493379 |
| 1157.679979 | 246.349068 | 5.55976E-06 | 0.006436417 |
| 1157.719979 | 277.279625 | 6.25781E-06 | 0.007244797 |
| 1157.759979 | 284.280555 | 6.41582E-06 | 0.007427975 |
| 1157.799979 | 285.856772 | 6.45139E-06 | 0.007469418 |
| 1157.839979 | 268.646376 | 6.06297E-06 | 0.007019954 |
| 1157.879979 | 235.995722 | 5.32609E-06 | 0.006166978 |
| 1157.919979 | 221.569602 | 5.00052E-06 | 0.005790199 |
| 1157.959979 | 248.85588  | 5.61633E-06 | 0.006503486 |
| 1157.999979 | 296.290666 | 6.68687E-06 | 0.007743393 |
| 1158.039979 | 298.188186 | 6.72969E-06 | 0.007793252 |
| 1158.079979 | 283.107027 | 6.38933E-06 | 0.007399357 |
| 1158.119979 | 305.058702 | 6.88475E-06 | 0.007973367 |
| 1158.159979 | 378.973875 | 8.55291E-06 | 0.009905641 |
| 1158.199979 | 426.242109 | 9.61969E-06 | 0.011141526 |
| 1158.239979 | 438.917451 | 9.90576E-06 | 0.011473242 |
| 1158.279979 | 425.413154 | 9.60098E-06 | 0.011120626 |
| 1158.319979 | 395.721461 | 8.93088E-06 | 0.010344819 |

|             |            |             |             |
|-------------|------------|-------------|-------------|
| 1158.359979 | 364.182651 | 8.2191E-06  | 0.009520671 |
| 1158.399979 | 338.623698 | 7.64227E-06 | 0.0088528   |
| 1158.439979 | 293.556358 | 6.62516E-06 | 0.007674848 |
| 1158.479979 | 244.174779 | 5.51068E-06 | 0.006384018 |
| 1158.519979 | 237.841159 | 5.36774E-06 | 0.006218638 |
| 1158.559979 | 266.426992 | 6.01289E-06 | 0.006966289 |
| 1158.599979 | 276.866369 | 6.24849E-06 | 0.007239498 |
| 1158.639979 | 258.5139   | 5.8343E-06  | 0.006759852 |
| 1158.679979 | 279.199733 | 6.30115E-06 | 0.007301015 |
| 1158.719979 | 299.036545 | 6.74884E-06 | 0.007820014 |
| 1158.759979 | 274.151553 | 6.18722E-06 | 0.007169501 |
| 1158.799979 | 282.404566 | 6.37348E-06 | 0.007385586 |
| 1158.839979 | 292.355645 | 6.59806E-06 | 0.007646095 |
| 1158.879979 | 293.281331 | 6.61895E-06 | 0.00767057  |
| 1158.919979 | 303.81334  | 6.85664E-06 | 0.007946302 |
| 1158.959979 | 316.849298 | 7.15085E-06 | 0.008287546 |
| 1158.999979 | 339.323788 | 7.65807E-06 | 0.008875697 |
| 1159.039979 | 348.192999 | 7.85823E-06 | 0.009108004 |
| 1159.079979 | 369.152664 | 8.33126E-06 | 0.009656598 |
| 1159.119979 | 395.865399 | 8.93413E-06 | 0.010355729 |
| 1159.159979 | 463.003882 | 1.04494E-05 | 0.012112471 |
| 1159.199979 | 549.6815   | 1.24055E-05 | 0.014380508 |
| 1159.239979 | 553.767064 | 1.24978E-05 | 0.014487893 |
| 1159.279979 | 524.419957 | 1.18354E-05 | 0.013720575 |
| 1159.319979 | 484.176516 | 1.09272E-05 | 0.012668109 |
| 1159.359979 | 427.438765 | 9.6467E-06  | 0.011183995 |
| 1159.399979 | 370.113306 | 8.35294E-06 | 0.009684401 |
| 1159.439979 | 325.318928 | 7.342E-06   | 0.008512603 |
| 1159.479979 | 268.029779 | 6.04906E-06 | 0.007013763 |
| 1159.519979 | 214.519313 | 4.8414E-06  | 0.005613702 |
| 1159.559979 | 194.023964 | 4.37885E-06 | 0.00507754  |
| 1159.599979 | 211.340552 | 4.76966E-06 | 0.0055309   |
| 1159.639979 | 235.75575  | 5.32068E-06 | 0.006170072 |
| 1159.679979 | 249.990966 | 5.64195E-06 | 0.006542854 |
| 1159.719979 | 235.112986 | 5.30617E-06 | 0.006153674 |
| 1159.759979 | 216.426512 | 4.88444E-06 | 0.005664784 |
| 1159.799979 | 222.390487 | 5.01904E-06 | 0.005821087 |
| 1159.839979 | 217.359992 | 4.90551E-06 | 0.005689609 |
| 1159.879979 | 222.153543 | 5.0137E-06  | 0.005815286 |
| 1159.919979 | 219.21643  | 4.94741E-06 | 0.005738599 |
| 1159.959979 | 215.188792 | 4.85651E-06 | 0.005633359 |
| 1159.999979 | 211.575488 | 4.77496E-06 | 0.005538958 |
| 1160.039979 | 246.824433 | 5.57048E-06 | 0.006461984 |
| 1160.079979 | 288.372073 | 6.50816E-06 | 0.007549981 |
| 1160.119979 | 333.62438  | 7.52944E-06 | 0.008735051 |
| 1160.159979 | 380.090305 | 8.57811E-06 | 0.009951978 |

|             |            |             |             |
|-------------|------------|-------------|-------------|
| 1160.199979 | 426.939612 | 9.63543E-06 | 0.011179028 |
| 1160.239979 | 473.830737 | 1.06937E-05 | 0.012407258 |
| 1160.279979 | 486.16314  | 1.0972E-05  | 0.012730621 |
| 1160.319979 | 453.205031 | 1.02282E-05 | 0.011867992 |
| 1160.359979 | 405.294409 | 9.14693E-06 | 0.010613732 |
| 1160.399979 | 313.785248 | 7.0817E-06  | 0.0082176   |
| 1160.439979 | 261.657104 | 5.90524E-06 | 0.006852672 |
| 1160.479979 | 261.915658 | 5.91107E-06 | 0.00685968  |
| 1160.519979 | 238.058038 | 5.37264E-06 | 0.006235054 |
| 1160.559979 | 231.629921 | 5.22756E-06 | 0.006066902 |
| 1160.599979 | 244.842932 | 5.52576E-06 | 0.006413202 |
| 1160.639979 | 249.594266 | 5.63299E-06 | 0.006537879 |
| 1160.679979 | 246.861856 | 5.57133E-06 | 0.006466529 |
| 1160.719979 | 251.213132 | 5.66953E-06 | 0.006580737 |
| 1160.759979 | 266.122675 | 6.00602E-06 | 0.006971545 |
| 1160.799979 | 294.950513 | 6.65662E-06 | 0.007727007 |
| 1160.839979 | 301.562626 | 6.80585E-06 | 0.007900501 |
| 1160.879979 | 289.796718 | 6.54031E-06 | 0.007592513 |
| 1160.919979 | 261.354161 | 5.8984E-06  | 0.00684757  |
| 1160.959979 | 255.424864 | 5.76458E-06 | 0.006692451 |
| 1160.999979 | 279.760751 | 6.31381E-06 | 0.007330334 |
| 1161.039979 | 343.051344 | 7.74219E-06 | 0.008988993 |
| 1161.079979 | 387.37673  | 8.74255E-06 | 0.010150804 |
| 1161.119979 | 427.769837 | 9.65417E-06 | 0.011209649 |
| 1161.159979 | 482.52236  | 1.08899E-05 | 0.012644867 |
| 1161.199979 | 516.607087 | 1.16591E-05 | 0.013538549 |
| 1161.239979 | 514.529796 | 1.16122E-05 | 0.013484575 |
| 1161.279979 | 498.522389 | 1.1251E-05  | 0.01306551  |
| 1161.319979 | 452.66352  | 1.0216E-05  | 0.011864028 |
| 1161.359979 | 400.679949 | 9.04279E-06 | 0.010501932 |
| 1161.399979 | 337.470914 | 7.61625E-06 | 0.008845511 |
| 1161.439979 | 291.715411 | 6.58361E-06 | 0.007646468 |
| 1161.479979 | 273.006303 | 6.16137E-06 | 0.00715631  |
| 1161.519979 | 258.465768 | 5.83321E-06 | 0.006775393 |
| 1161.559979 | 243.346432 | 5.49199E-06 | 0.006379276 |
| 1161.599979 | 244.105188 | 5.50911E-06 | 0.006399387 |
| 1161.639979 | 257.748656 | 5.81703E-06 | 0.006757292 |
| 1161.679979 | 257.125802 | 5.80297E-06 | 0.006741195 |
| 1161.719979 | 262.332965 | 5.92049E-06 | 0.006877951 |
| 1161.759979 | 261.379681 | 5.89898E-06 | 0.006853193 |
| 1161.799979 | 233.500004 | 5.26977E-06 | 0.006122419 |
| 1161.839979 | 205.798556 | 4.64459E-06 | 0.005396267 |
| 1161.879979 | 188.508611 | 4.25438E-06 | 0.004943075 |
| 1161.919978 | 206.295236 | 4.6558E-06  | 0.005409663 |
| 1161.959978 | 244.182693 | 5.51086E-06 | 0.006403403 |
| 1161.999978 | 261.989576 | 5.91274E-06 | 0.006870604 |

|             |            |             |             |
|-------------|------------|-------------|-------------|
| 1162.039978 | 265.70827  | 5.99667E-06 | 0.006968365 |
| 1162.079978 | 288.242017 | 6.50522E-06 | 0.007559587 |
| 1162.119978 | 336.92778  | 7.60399E-06 | 0.008836749 |
| 1162.159978 | 403.992558 | 9.11755E-06 | 0.010596051 |
| 1162.199978 | 462.3645   | 1.04349E-05 | 0.012127467 |
| 1162.239978 | 455.20539  | 1.02734E-05 | 0.0119401   |
| 1162.279978 | 415.184561 | 9.37014E-06 | 0.010890723 |
| 1162.319978 | 395.726241 | 8.93099E-06 | 0.010380668 |
| 1162.359978 | 357.421799 | 8.06651E-06 | 0.009376191 |
| 1162.399978 | 299.409552 | 6.75726E-06 | 0.007854635 |
| 1162.439978 | 267.228563 | 6.03098E-06 | 0.007010648 |
| 1162.479978 | 268.05488  | 6.04963E-06 | 0.007032568 |
| 1162.519978 | 267.144201 | 6.02907E-06 | 0.007008917 |
| 1162.559978 | 259.523121 | 5.85708E-06 | 0.006809201 |
| 1162.599978 | 233.779373 | 5.27607E-06 | 0.006133964 |
| 1162.639978 | 229.845455 | 5.18729E-06 | 0.006030953 |
| 1162.679978 | 235.66758  | 5.31869E-06 | 0.006183933 |
| 1162.719978 | 247.224547 | 5.57951E-06 | 0.006487412 |
| 1162.759978 | 274.396281 | 6.19274E-06 | 0.007200672 |
| 1162.799978 | 279.529278 | 6.30859E-06 | 0.007335624 |
| 1162.839978 | 251.814818 | 5.68311E-06 | 0.006608547 |
| 1162.879978 | 239.594264 | 5.40731E-06 | 0.006288051 |
| 1162.919978 | 257.719619 | 5.81637E-06 | 0.006763976 |
| 1162.959978 | 281.261234 | 6.34767E-06 | 0.007382091 |
| 1162.999978 | 281.606809 | 6.35547E-06 | 0.007391415 |
| 1163.039978 | 272.134439 | 6.1417E-06  | 0.007143037 |
| 1163.079978 | 295.515492 | 6.66937E-06 | 0.007757014 |
| 1163.119978 | 356.167812 | 8.03821E-06 | 0.009349404 |
| 1163.159978 | 436.135039 | 9.84296E-06 | 0.011448938 |
| 1163.199978 | 533.912025 | 1.20497E-05 | 0.014016153 |
| 1163.239978 | 544.458859 | 1.22877E-05 | 0.014293518 |
| 1163.279978 | 491.858927 | 1.11006E-05 | 0.012913072 |
| 1163.319978 | 441.207641 | 9.95744E-06 | 0.011583691 |
| 1163.359978 | 409.85296  | 9.24981E-06 | 0.010760859 |
| 1163.399978 | 384.127803 | 8.66923E-06 | 0.010085781 |
| 1163.439978 | 344.264606 | 7.76957E-06 | 0.009039431 |
| 1163.479978 | 303.32025  | 6.84552E-06 | 0.00796462  |
| 1163.519978 | 247.034413 | 5.57522E-06 | 0.006486883 |
| 1163.559978 | 220.88286  | 4.98502E-06 | 0.005800368 |
| 1163.599978 | 224.78327  | 5.07305E-06 | 0.005902995 |
| 1163.639978 | 245.055984 | 5.53057E-06 | 0.006435595 |
| 1163.679978 | 269.009074 | 6.07116E-06 | 0.007064887 |
| 1163.719978 | 301.959648 | 6.81481E-06 | 0.007930529 |
| 1163.759978 | 336.115606 | 7.58566E-06 | 0.008827889 |
| 1163.799978 | 336.739837 | 7.59975E-06 | 0.008844588 |
| 1163.839978 | 317.815906 | 7.17266E-06 | 0.008347831 |



|             |            |             |             |
|-------------|------------|-------------|-------------|
| 1163.879978 | 273.532798 | 6.17325E-06 | 0.007184927 |
| 1163.919978 | 252.108628 | 5.68974E-06 | 0.006622403 |
| 1163.959978 | 257.001384 | 5.80016E-06 | 0.006751158 |
| 1163.999978 | 271.3374   | 6.12371E-06 | 0.007127995 |
| 1164.039978 | 286.507289 | 6.46607E-06 | 0.007526764 |
| 1164.079978 | 300.269735 | 6.77667E-06 | 0.007888585 |
| 1164.119978 | 318.95903  | 7.19846E-06 | 0.008379872 |
| 1164.159978 | 349.113977 | 7.87902E-06 | 0.009172435 |
| 1164.199978 | 393.329839 | 8.87691E-06 | 0.010334494 |
| 1164.239978 | 432.775211 | 9.76713E-06 | 0.011371288 |
| 1164.279978 | 443.395201 | 1.00068E-05 | 0.011650731 |
| 1164.319978 | 444.190108 | 1.00248E-05 | 0.011672019 |
| 1164.359978 | 419.682245 | 9.47164E-06 | 0.011028403 |
| 1164.399978 | 346.21325  | 7.81355E-06 | 0.009098098 |
| 1164.439978 | 280.708278 | 6.33519E-06 | 0.007376954 |
| 1164.479978 | 256.568519 | 5.79039E-06 | 0.006742798 |
| 1164.519978 | 259.20509  | 5.8499E-06  | 0.006812323 |
| 1164.559978 | 258.700111 | 5.8385E-06  | 0.006799285 |
| 1164.599978 | 261.696004 | 5.90611E-06 | 0.006878261 |
| 1164.639978 | 282.598019 | 6.37784E-06 | 0.007427892 |
| 1164.679978 | 295.516735 | 6.6694E-06  | 0.007767718 |
| 1164.719978 | 297.0848   | 6.70479E-06 | 0.007809203 |
| 1164.759978 | 283.310005 | 6.39391E-06 | 0.007447373 |
| 1164.799978 | 290.0128   | 6.54518E-06 | 0.007623831 |
| 1164.839978 | 294.293163 | 6.64179E-06 | 0.007736619 |
| 1164.879978 | 277.51911  | 6.26322E-06 | 0.007295899 |
| 1164.919978 | 265.67562  | 5.99593E-06 | 0.006984777 |
| 1164.959978 | 266.854986 | 6.02255E-06 | 0.007016024 |
| 1164.999978 | 288.140143 | 6.50292E-06 | 0.007575904 |
| 1165.039978 | 333.144674 | 7.51861E-06 | 0.008759483 |
| 1165.079978 | 360.267679 | 8.13074E-06 | 0.009472962 |
| 1165.119978 | 390.126096 | 8.8046E-06  | 0.010258418 |
| 1165.159978 | 421.718363 | 9.5176E-06  | 0.011089522 |
| 1165.199978 | 467.944051 | 1.05608E-05 | 0.012305497 |
| 1165.239978 | 486.46256  | 1.09788E-05 | 0.012792916 |
| 1165.279978 | 465.368374 | 1.05027E-05 | 0.012238605 |
| 1165.319978 | 454.865732 | 1.02657E-05 | 0.011962809 |
| 1165.359978 | 453.869177 | 1.02432E-05 | 0.01193701  |
| 1165.399978 | 404.645376 | 9.13228E-06 | 0.010642762 |
| 1165.439978 | 320.221149 | 7.22695E-06 | 0.008422571 |
| 1165.479978 | 245.679635 | 5.54465E-06 | 0.006462175 |
| 1165.519978 | 209.575804 | 4.72983E-06 | 0.005512716 |
| 1165.559978 | 194.394023 | 4.3872E-06  | 0.005113547 |
| 1165.599978 | 207.805499 | 4.68988E-06 | 0.005466525 |
| 1165.639978 | 221.720024 | 5.00391E-06 | 0.00583276  |
| 1165.679978 | 243.394414 | 5.49307E-06 | 0.006403165 |

|             |            |             |             |
|-------------|------------|-------------|-------------|
| 1165.719978 | 274.943243 | 6.20509E-06 | 0.007233393 |
| 1165.759978 | 296.795842 | 6.69827E-06 | 0.007808574 |
| 1165.799978 | 289.26692  | 6.52835E-06 | 0.007610752 |
| 1165.839978 | 265.051671 | 5.98185E-06 | 0.006973876 |
| 1165.879978 | 235.887909 | 5.32366E-06 | 0.00620675  |
| 1165.919978 | 217.945174 | 4.91872E-06 | 0.005734833 |
| 1165.959978 | 243.926347 | 5.50508E-06 | 0.0064187   |
| 1165.999978 | 244.97164  | 5.52867E-06 | 0.006446428 |
| 1166.039978 | 258.102575 | 5.82502E-06 | 0.006792201 |
| 1166.079978 | 290.538422 | 6.55705E-06 | 0.007646042 |
| 1166.119978 | 312.728261 | 7.05784E-06 | 0.00823029  |
| 1166.159978 | 314.69433  | 7.10221E-06 | 0.008282316 |
| 1166.199978 | 331.221376 | 7.47521E-06 | 0.008717584 |
| 1166.239978 | 361.323323 | 8.15456E-06 | 0.009510179 |
| 1166.279978 | 368.934803 | 8.32634E-06 | 0.009710849 |
| 1166.319978 | 374.273373 | 8.44683E-06 | 0.009851705 |
| 1166.359978 | 383.165831 | 8.64752E-06 | 0.01008612  |
| 1166.399978 | 356.250675 | 8.04008E-06 | 0.009377951 |
| 1166.439978 | 303.042647 | 6.83925E-06 | 0.007977575 |
| 1166.479978 | 243.916689 | 5.50486E-06 | 0.006421309 |
| 1166.519978 | 218.860878 | 4.93939E-06 | 0.005761891 |
| 1166.559978 | 223.615524 | 5.04669E-06 | 0.005887268 |
| 1166.599978 | 227.426633 | 5.1327E-06  | 0.00598781  |
| 1166.639978 | 226.591479 | 5.11385E-06 | 0.005966027 |
| 1166.679978 | 250.787947 | 5.65993E-06 | 0.006603332 |
| 1166.719978 | 264.829403 | 5.97683E-06 | 0.006973288 |
| 1166.759978 | 254.535149 | 5.7445E-06  | 0.006702457 |
| 1166.799978 | 258.515201 | 5.83433E-06 | 0.006807494 |
| 1166.839978 | 250.777431 | 5.6597E-06  | 0.006603961 |
| 1166.879978 | 255.596473 | 5.76846E-06 | 0.006731096 |
| 1166.919978 | 259.921905 | 5.86608E-06 | 0.006845241 |
| 1166.959978 | 265.214119 | 5.98551E-06 | 0.006984854 |
| 1166.999978 | 272.94625  | 6.16002E-06 | 0.007188739 |
| 1167.039978 | 303.247085 | 6.84386E-06 | 0.007987063 |
| 1167.079978 | 347.278053 | 7.83758E-06 | 0.009147085 |
| 1167.119978 | 377.48602  | 8.51933E-06 | 0.009943085 |
| 1167.159978 | 401.192044 | 9.05435E-06 | 0.01056787  |
| 1167.199978 | 428.600878 | 9.67292E-06 | 0.011290238 |
| 1167.239978 | 463.675191 | 1.04645E-05 | 0.012214587 |
| 1167.279978 | 467.760992 | 1.05567E-05 | 0.012322641 |
| 1167.319978 | 444.110939 | 1.0023E-05  | 0.011700008 |
| 1167.359978 | 379.936303 | 8.57463E-06 | 0.010009684 |
| 1167.399978 | 293.362669 | 6.62079E-06 | 0.007729106 |
| 1167.439978 | 245.32379  | 5.53662E-06 | 0.006463667 |
| 1167.479978 | 204.272318 | 4.61014E-06 | 0.005382248 |
| 1167.519978 | 195.873067 | 4.42058E-06 | 0.005161118 |

|             |            |             |             |
|-------------|------------|-------------|-------------|
| 1167.559978 | 222.93246  | 5.03128E-06 | 0.005874315 |
| 1167.599978 | 219.050868 | 4.94367E-06 | 0.005772232 |
| 1167.639978 | 214.131745 | 4.83266E-06 | 0.005642801 |
| 1167.679978 | 225.687001 | 5.09344E-06 | 0.005947509 |
| 1167.719978 | 253.824975 | 5.72848E-06 | 0.006689256 |
| 1167.759978 | 261.626359 | 5.90454E-06 | 0.006895088 |
| 1167.799978 | 250.442376 | 5.65214E-06 | 0.006600564 |
| 1167.839978 | 261.479779 | 5.90123E-06 | 0.006891697 |
| 1167.879978 | 261.252163 | 5.8961E-06  | 0.006885934 |
| 1167.919978 | 256.521191 | 5.78933E-06 | 0.006761469 |
| 1167.959978 | 254.226533 | 5.73754E-06 | 0.006701216 |
| 1167.999978 | 255.909484 | 5.77552E-06 | 0.006745808 |
| 1168.039978 | 269.777833 | 6.08851E-06 | 0.007111623 |
| 1168.079978 | 319.530289 | 7.21135E-06 | 0.008423438 |
| 1168.119978 | 361.281516 | 8.15362E-06 | 0.009524407 |
| 1168.159978 | 373.487903 | 8.4291E-06  | 0.009846539 |
| 1168.199978 | 381.042362 | 8.5996E-06  | 0.010046047 |
| 1168.239978 | 402.897048 | 9.09283E-06 | 0.010622602 |
| 1168.279978 | 453.949849 | 1.0245E-05  | 0.011969047 |
| 1168.319978 | 450.634179 | 1.01702E-05 | 0.011882031 |
| 1168.359978 | 391.388168 | 8.83309E-06 | 0.010320224 |
| 1168.399978 | 331.456275 | 7.48051E-06 | 0.008740224 |
| 1168.439978 | 286.995838 | 6.4771E-06  | 0.007568098 |
| 1168.479978 | 260.357904 | 5.87592E-06 | 0.006865889 |
| 1168.519978 | 236.1291   | 5.3291E-06  | 0.006227166 |
| 1168.559978 | 239.903648 | 5.41429E-06 | 0.006326924 |
| 1168.599978 | 273.706087 | 6.17717E-06 | 0.007218635 |
| 1168.639978 | 265.456958 | 5.99099E-06 | 0.007001315 |
| 1168.679978 | 269.132957 | 6.07396E-06 | 0.007098511 |
| 1168.719978 | 308.384817 | 6.95982E-06 | 0.008134076 |
| 1168.759978 | 315.49983  | 7.12039E-06 | 0.008322029 |
| 1168.799978 | 294.085375 | 6.6371E-06  | 0.007757439 |
| 1168.839978 | 300.880076 | 6.79044E-06 | 0.007936943 |
| 1168.879978 | 328.749654 | 7.41942E-06 | 0.008672414 |
| 1168.919978 | 339.923336 | 7.6716E-06  | 0.008967482 |
| 1168.959978 | 350.360768 | 7.90715E-06 | 0.009243147 |
| 1168.999978 | 354.813246 | 8.00764E-06 | 0.009360932 |
| 1169.039978 | 370.578045 | 8.36343E-06 | 0.009777184 |
| 1169.079978 | 417.374712 | 9.41957E-06 | 0.011012226 |
| 1169.119978 | 505.209498 | 1.14019E-05 | 0.013330159 |
| 1169.159978 | 563.519479 | 1.27178E-05 | 0.014869201 |
| 1169.199978 | 558.192675 | 1.25976E-05 | 0.01472915  |
| 1169.239978 | 544.49628  | 1.22885E-05 | 0.014368232 |
| 1169.279978 | 522.202491 | 1.17854E-05 | 0.013780412 |
| 1169.319978 | 492.772077 | 1.11212E-05 | 0.013004217 |
| 1169.359978 | 451.82009  | 1.0197E-05  | 0.011923905 |

|             |            |             |             |
|-------------|------------|-------------|-------------|
| 1169.399978 | 399.757788 | 9.02198E-06 | 0.010550299 |
| 1169.439978 | 338.455971 | 7.63848E-06 | 0.008932744 |
| 1169.479978 | 279.025861 | 6.29723E-06 | 0.007364479 |
| 1169.519978 | 256.179298 | 5.78161E-06 | 0.006761708 |
| 1169.559978 | 226.509846 | 5.11201E-06 | 0.005978804 |
| 1169.599978 | 221.249044 | 4.99328E-06 | 0.005840143 |
| 1169.639978 | 253.671832 | 5.72502E-06 | 0.006696212 |
| 1169.679978 | 283.507582 | 6.39837E-06 | 0.007484047 |
| 1169.719978 | 274.094272 | 6.18593E-06 | 0.007235801 |
| 1169.759978 | 253.15248  | 5.7133E-06  | 0.006683188 |
| 1169.799978 | 266.881249 | 6.02314E-06 | 0.007045867 |
| 1169.839978 | 291.448691 | 6.57759E-06 | 0.007694729 |
| 1169.879978 | 295.592973 | 6.67112E-06 | 0.007804412 |
| 1169.919978 | 276.613675 | 6.24279E-06 | 0.007303559 |
| 1169.959978 | 298.462025 | 6.73587E-06 | 0.007880701 |
| 1169.999978 | 338.52856  | 7.64012E-06 | 0.008938938 |
| 1170.039978 | 341.801881 | 7.71399E-06 | 0.009025679 |
| 1170.079978 | 344.12837  | 7.7665E-06  | 0.009087424 |
| 1170.119978 | 371.410272 | 8.38221E-06 | 0.009808194 |
| 1170.159978 | 421.625872 | 9.51551E-06 | 0.011134667 |
| 1170.199978 | 487.247887 | 1.09965E-05 | 0.012868111 |
| 1170.239978 | 516.886294 | 1.16654E-05 | 0.013651322 |
| 1170.279978 | 545.987172 | 1.23222E-05 | 0.014420389 |
| 1170.319978 | 559.503031 | 1.26272E-05 | 0.014777869 |
| 1170.359978 | 537.374422 | 1.21278E-05 | 0.014193883 |
| 1170.399978 | 483.16223  | 1.09043E-05 | 0.012762391 |
| 1170.439978 | 419.799903 | 9.4743E-06  | 0.011089098 |
| 1170.479978 | 345.571672 | 7.79907E-06 | 0.009128657 |
| 1170.519978 | 281.494665 | 6.35294E-06 | 0.007436246 |
| 1170.559978 | 269.991728 | 6.09334E-06 | 0.007132617 |
| 1170.599978 | 277.669459 | 6.26661E-06 | 0.007335697 |
| 1170.639978 | 277.656729 | 6.26633E-06 | 0.007335611 |
| 1170.679978 | 268.416776 | 6.05779E-06 | 0.007091737 |
| 1170.719978 | 273.368818 | 6.16955E-06 | 0.007222819 |
| 1170.759978 | 280.116053 | 6.32183E-06 | 0.007401345 |
| 1170.799978 | 266.401154 | 6.0123E-06  | 0.007039204 |
| 1170.839978 | 272.617213 | 6.15259E-06 | 0.007203699 |
| 1170.879978 | 293.984903 | 6.63483E-06 | 0.007768589 |
| 1170.919978 | 300.840859 | 6.78956E-06 | 0.00795003  |
| 1170.959978 | 313.231664 | 7.0692E-06  | 0.008277753 |
| 1170.999978 | 319.530674 | 7.21136E-06 | 0.008444505 |
| 1171.039978 | 314.48769  | 7.09755E-06 | 0.008311514 |
| 1171.079978 | 358.696846 | 8.09529E-06 | 0.00948023  |
| 1171.119978 | 427.771711 | 9.65421E-06 | 0.01130624  |
| 1171.159978 | 455.488783 | 1.02797E-05 | 0.012039229 |
| 1171.199978 | 484.107696 | 1.09256E-05 | 0.012796105 |

|             |            |             |             |
|-------------|------------|-------------|-------------|
| 1171.239978 | 544.773932 | 1.22948E-05 | 0.014400148 |
| 1171.279978 | 558.056138 | 1.25945E-05 | 0.014751744 |
| 1171.319978 | 521.920123 | 1.1779E-05  | 0.01379699  |
| 1171.359978 | 448.830593 | 1.01295E-05 | 0.011865269 |
| 1171.399978 | 360.489063 | 8.13574E-06 | 0.009530201 |
| 1171.439978 | 300.568337 | 6.78341E-06 | 0.007946356 |
| 1171.479978 | 277.012163 | 6.25178E-06 | 0.007323834 |
| 1171.519978 | 253.146506 | 5.71316E-06 | 0.006693086 |
| 1171.559978 | 212.619845 | 4.79853E-06 | 0.00562177  |
| 1171.599978 | 198.984416 | 4.4908E-06  | 0.005261422 |
| 1171.639978 | 214.133644 | 4.8327E-06  | 0.005662182 |
| 1171.679978 | 213.411925 | 4.81641E-06 | 0.005643291 |
| 1171.719978 | 234.481231 | 5.29191E-06 | 0.006200642 |
| 1171.759978 | 249.594603 | 5.633E-06   | 0.006600527 |
| 1171.799978 | 248.40825  | 5.60623E-06 | 0.006569378 |
| 1171.839978 | 254.939077 | 5.75362E-06 | 0.006742322 |
| 1171.879978 | 263.817516 | 5.95399E-06 | 0.006977366 |
| 1171.919978 | 246.61962  | 5.56586E-06 | 0.006522744 |
| 1171.959978 | 226.558548 | 5.11311E-06 | 0.005992361 |
| 1171.999978 | 217.527044 | 4.90928E-06 | 0.005753679 |
| 1172.039978 | 252.161984 | 5.69094E-06 | 0.006670015 |
| 1172.079978 | 302.479599 | 6.82654E-06 | 0.008001255 |
| 1172.119978 | 340.164905 | 7.67705E-06 | 0.008998421 |
| 1172.159978 | 384.819215 | 8.68483E-06 | 0.010180014 |
| 1172.199978 | 410.996664 | 9.27562E-06 | 0.010872884 |
| 1172.239978 | 427.353538 | 9.64477E-06 | 0.01130599  |
| 1172.279978 | 434.675814 | 9.81003E-06 | 0.011500099 |
| 1172.319978 | 468.394049 | 1.0571E-05  | 0.012392596 |
| 1172.359978 | 439.361884 | 9.91579E-06 | 0.01162487  |
| 1172.399978 | 367.276644 | 8.28892E-06 | 0.009717932 |
| 1172.439978 | 299.408788 | 6.75724E-06 | 0.007922458 |
| 1172.479978 | 266.866785 | 6.02281E-06 | 0.007061626 |
| 1172.519978 | 259.658066 | 5.86012E-06 | 0.006871109 |
| 1172.559978 | 251.160832 | 5.66835E-06 | 0.006646481 |
| 1172.599978 | 252.867434 | 5.70687E-06 | 0.006691871 |
| 1172.639978 | 271.654197 | 6.13086E-06 | 0.007189288 |
| 1172.679978 | 292.50547  | 6.60144E-06 | 0.007741378 |
| 1172.719978 | 294.651331 | 6.64987E-06 | 0.007798436 |
| 1172.759978 | 281.48115  | 6.35264E-06 | 0.007450119 |
| 1172.799978 | 272.899719 | 6.15897E-06 | 0.007223236 |
| 1172.839978 | 280.481042 | 6.33007E-06 | 0.007424155 |
| 1172.879978 | 271.486739 | 6.12708E-06 | 0.007186327 |
| 1172.919978 | 276.389954 | 6.23774E-06 | 0.007316366 |
| 1172.959978 | 286.000611 | 6.45464E-06 | 0.007571029 |
| 1172.999978 | 304.069267 | 6.86242E-06 | 0.008049618 |
| 1173.039978 | 333.456351 | 7.52565E-06 | 0.008827883 |

|             |            |             |             |
|-------------|------------|-------------|-------------|
| 1173.079978 | 345.543824 | 7.79844E-06 | 0.009148197 |
| 1173.119978 | 360.849651 | 8.14387E-06 | 0.009553741 |
| 1173.159978 | 390.592409 | 8.81513E-06 | 0.010341554 |
| 1173.199978 | 430.832398 | 9.72329E-06 | 0.01140736  |
| 1173.239978 | 471.391285 | 1.06386E-05 | 0.012481683 |
| 1173.279978 | 502.727314 | 1.13459E-05 | 0.013311865 |
| 1173.319978 | 493.810101 | 1.11446E-05 | 0.013076189 |
| 1173.359978 | 443.520091 | 1.00096E-05 | 0.0117449   |
| 1173.399978 | 384.00415  | 8.66644E-06 | 0.010169199 |
| 1173.439978 | 344.684724 | 7.77905E-06 | 0.009128253 |
| 1173.479978 | 299.544994 | 6.76031E-06 | 0.007933092 |
| 1173.519978 | 227.669427 | 5.13818E-06 | 0.006029759 |
| 1173.559978 | 193.897449 | 4.376E-06   | 0.005135493 |
| 1173.599978 | 208.837488 | 4.71317E-06 | 0.005531378 |
| 1173.639978 | 238.835007 | 5.39017E-06 | 0.006326123 |
| 1173.679978 | 245.521059 | 5.54107E-06 | 0.006503441 |
| 1173.719978 | 246.321849 | 5.55914E-06 | 0.006524875 |
| 1173.759978 | 230.889631 | 5.21086E-06 | 0.006116296 |
| 1173.799978 | 224.142672 | 5.05859E-06 | 0.00593777  |
| 1173.839978 | 221.689193 | 5.00322E-06 | 0.005872975 |
| 1173.879978 | 212.411102 | 4.79382E-06 | 0.005627372 |
| 1173.919978 | 205.237292 | 4.63192E-06 | 0.005437503 |
| 1173.959978 | 215.1239   | 4.85505E-06 | 0.005699631 |
| 1173.999978 | 233.581109 | 5.2716E-06  | 0.006188859 |
| 1174.039978 | 251.68272  | 5.68013E-06 | 0.006668698 |
| 1174.079978 | 280.852754 | 6.33846E-06 | 0.007441854 |
| 1174.119978 | 325.058365 | 7.33611E-06 | 0.008613479 |
| 1174.159978 | 351.415311 | 7.93095E-06 | 0.009312209 |
| 1174.199978 | 406.456865 | 9.17317E-06 | 0.01077113  |
| 1174.239978 | 423.25109  | 9.55219E-06 | 0.011216561 |
| 1174.279978 | 401.01852  | 9.05043E-06 | 0.010627738 |
| 1174.319978 | 398.121039 | 8.98504E-06 | 0.010551309 |
| 1174.359978 | 376.916181 | 8.50647E-06 | 0.009989662 |
| 1174.399978 | 319.579711 | 7.21247E-06 | 0.008470323 |
| 1174.439978 | 290.082757 | 6.54676E-06 | 0.007688781 |
| 1174.479978 | 271.557124 | 6.12867E-06 | 0.007197996 |
| 1174.519978 | 231.838412 | 5.23227E-06 | 0.006145406 |
| 1174.559978 | 207.932737 | 4.69275E-06 | 0.005511919 |
| 1174.599978 | 214.746018 | 4.84652E-06 | 0.005692721 |
| 1174.639978 | 219.92791  | 4.96347E-06 | 0.005830286 |
| 1174.679978 | 227.828876 | 5.14178E-06 | 0.006039946 |
| 1174.719978 | 247.985317 | 5.59668E-06 | 0.006574536 |
| 1174.759978 | 272.052039 | 6.13984E-06 | 0.007212833 |
| 1174.799978 | 280.548778 | 6.3316E-06  | 0.007438358 |
| 1174.839978 | 261.560662 | 5.90306E-06 | 0.006935151 |
| 1174.879978 | 257.539483 | 5.81231E-06 | 0.006828764 |

|             |            |             |             |
|-------------|------------|-------------|-------------|
| 1174.919978 | 260.066156 | 5.86933E-06 | 0.006895994 |
| 1174.959978 | 248.41666  | 5.60642E-06 | 0.006587317 |
| 1174.999978 | 241.486876 | 5.45002E-06 | 0.006403776 |
| 1175.039978 | 281.114681 | 6.34437E-06 | 0.007454885 |
| 1175.079978 | 360.619241 | 8.13867E-06 | 0.009563593 |
| 1175.119978 | 424.45511  | 9.57936E-06 | 0.011256898 |
| 1175.159978 | 469.392587 | 1.05935E-05 | 0.012449101 |
| 1175.199978 | 511.246748 | 1.15381E-05 | 0.013559607 |
| 1175.239978 | 548.937377 | 1.23888E-05 | 0.014559757 |
| 1175.279978 | 598.092014 | 1.34981E-05 | 0.015864051 |
| 1175.319978 | 587.941725 | 1.3269E-05  | 0.015595351 |
| 1175.359978 | 538.081323 | 1.21437E-05 | 0.014273273 |
| 1175.399978 | 472.781774 | 1.067E-05   | 0.012541548 |
| 1175.439978 | 385.671093 | 8.70406E-06 | 0.010231099 |
| 1175.479978 | 300.829288 | 6.7893E-06  | 0.007980684 |
| 1175.519978 | 235.216295 | 5.3085E-06  | 0.006240253 |
| 1175.559978 | 225.30053  | 5.08472E-06 | 0.005977392 |
| 1175.599978 | 264.413023 | 5.96743E-06 | 0.007015315 |
| 1175.639978 | 277.335254 | 6.25907E-06 | 0.007358413 |
| 1175.679978 | 268.293034 | 6.055E-06   | 0.007118742 |
| 1175.719978 | 249.475075 | 5.6303E-06  | 0.006619662 |
| 1175.759978 | 250.139786 | 5.64531E-06 | 0.006637526 |
| 1175.799978 | 227.583231 | 5.13624E-06 | 0.006039187 |
| 1175.839978 | 195.70684  | 4.41683E-06 | 0.005193486 |
| 1175.879978 | 188.692795 | 4.25853E-06 | 0.005007524 |
| 1175.919978 | 206.25308  | 4.65484E-06 | 0.005473725 |
| 1175.959978 | 248.987956 | 5.61931E-06 | 0.006608085 |
| 1175.999978 | 273.532464 | 6.17325E-06 | 0.007259738 |
| 1176.039978 | 295.356088 | 6.66578E-06 | 0.007839218 |
| 1176.079978 | 323.047225 | 7.29073E-06 | 0.008574477 |
| 1176.119978 | 356.724304 | 8.05077E-06 | 0.009468672 |
| 1176.159978 | 391.146375 | 8.82763E-06 | 0.010382704 |
| 1176.199978 | 411.621599 | 9.28973E-06 | 0.010926576 |
| 1176.239978 | 435.590053 | 9.83066E-06 | 0.011563216 |
| 1176.279978 | 437.854356 | 9.88176E-06 | 0.01162372  |
| 1176.319978 | 427.291158 | 9.64337E-06 | 0.011343684 |
| 1176.359978 | 410.453235 | 9.26336E-06 | 0.010897043 |
| 1176.399978 | 373.775766 | 8.4356E-06  | 0.009923638 |
| 1176.439978 | 331.344327 | 7.47798E-06 | 0.008797395 |
| 1176.479978 | 291.573584 | 6.58041E-06 | 0.00774172  |
| 1176.519978 | 277.102437 | 6.25382E-06 | 0.007357739 |
| 1176.559978 | 276.264635 | 6.23491E-06 | 0.007335743 |
| 1176.599978 | 270.764882 | 6.11079E-06 | 0.007189951 |
| 1176.639978 | 255.522376 | 5.76678E-06 | 0.006785429 |
| 1176.679978 | 230.878813 | 5.21061E-06 | 0.006131224 |
| 1176.719978 | 247.476786 | 5.58521E-06 | 0.006572224 |

|             |            |             |             |
|-------------|------------|-------------|-------------|
| 1176.759978 | 271.58546  | 6.12931E-06 | 0.007212721 |
| 1176.799978 | 247.737419 | 5.59109E-06 | 0.006579593 |
| 1176.839978 | 248.72621  | 5.6134E-06  | 0.006606078 |
| 1176.879978 | 284.612545 | 6.42331E-06 | 0.007559463 |
| 1176.919978 | 292.686664 | 6.60553E-06 | 0.007774181 |
| 1176.959978 | 270.664526 | 6.10852E-06 | 0.007189485 |
| 1176.999978 | 251.454257 | 5.67497E-06 | 0.006679442 |
| 1177.039978 | 291.747902 | 6.58434E-06 | 0.007750036 |
| 1177.079978 | 367.184367 | 8.28684E-06 | 0.009754273 |
| 1177.119978 | 427.491143 | 9.64788E-06 | 0.011356712 |
| 1177.159978 | 482.269989 | 1.08842E-05 | 0.0128124   |
| 1177.199978 | 535.993261 | 1.20966E-05 | 0.014240142 |
| 1177.239978 | 579.478704 | 1.3078E-05  | 0.015395976 |
| 1177.279978 | 582.95183  | 1.31564E-05 | 0.015488779 |
| 1177.319978 | 530.417031 | 1.19708E-05 | 0.014093431 |
| 1177.359978 | 463.681109 | 1.04646E-05 | 0.012320645 |
| 1177.399978 | 395.668055 | 8.92968E-06 | 0.010513801 |
| 1177.439978 | 339.076043 | 7.65247E-06 | 0.009010329 |
| 1177.479978 | 290.690157 | 6.56047E-06 | 0.007724824 |
| 1177.519978 | 249.869891 | 5.63922E-06 | 0.006640289 |
| 1177.559978 | 219.846745 | 4.96163E-06 | 0.005842623 |
| 1177.599978 | 213.935119 | 4.82822E-06 | 0.005685709 |
| 1177.639978 | 240.029607 | 5.41713E-06 | 0.006379433 |
| 1177.679978 | 260.533696 | 5.87988E-06 | 0.00692462  |
| 1177.719978 | 272.755297 | 6.15571E-06 | 0.007249699 |
| 1177.759978 | 252.042137 | 5.68824E-06 | 0.006699381 |
| 1177.799978 | 217.266069 | 4.90339E-06 | 0.005775216 |
| 1177.839978 | 224.766089 | 5.07266E-06 | 0.005974779 |
| 1177.879978 | 221.28952  | 4.9942E-06  | 0.005882564 |
| 1177.919978 | 204.84651  | 4.6231E-06  | 0.005445642 |
| 1177.959978 | 199.937033 | 4.5123E-06  | 0.005315309 |
| 1177.999978 | 208.159099 | 4.69786E-06 | 0.00553408  |
| 1178.039978 | 246.07539  | 5.55358E-06 | 0.006542338 |
| 1178.079978 | 290.50924  | 6.55639E-06 | 0.00772395  |
| 1178.119978 | 339.047644 | 7.65183E-06 | 0.009014777 |
| 1178.159978 | 380.071158 | 8.57768E-06 | 0.010105875 |
| 1178.199978 | 385.52855  | 8.70084E-06 | 0.010251332 |
| 1178.239978 | 413.036605 | 9.32166E-06 | 0.010983153 |
| 1178.279978 | 452.037444 | 1.02019E-05 | 0.012020642 |
| 1178.319978 | 453.067958 | 1.02251E-05 | 0.012048455 |
| 1178.359978 | 412.264757 | 9.30424E-06 | 0.010963746 |
| 1178.399978 | 384.747203 | 8.68321E-06 | 0.010232293 |
| 1178.439978 | 345.119858 | 7.78887E-06 | 0.009178721 |
| 1178.479978 | 291.743961 | 6.58425E-06 | 0.007759412 |
| 1178.519978 | 253.03476  | 5.71064E-06 | 0.006730106 |
| 1178.559978 | 235.140648 | 5.3068E-06  | 0.006254378 |



|             |            |             |             |
|-------------|------------|-------------|-------------|
| 1178.599978 | 242.782271 | 5.47926E-06 | 0.006457853 |
| 1178.639978 | 230.48765  | 5.20179E-06 | 0.006131032 |
| 1178.679978 | 205.243685 | 4.63206E-06 | 0.005459721 |
| 1178.719978 | 230.117871 | 5.19344E-06 | 0.006121611 |
| 1178.759978 | 261.18282  | 5.89453E-06 | 0.006948239 |
| 1178.799978 | 250.086955 | 5.64411E-06 | 0.006653282 |
| 1178.839978 | 237.152399 | 5.3522E-06  | 0.006309387 |
| 1178.879978 | 233.46064  | 5.26888E-06 | 0.006211379 |
| 1178.919978 | 254.782754 | 5.75009E-06 | 0.006778898 |
| 1178.959978 | 284.598106 | 6.42298E-06 | 0.00757244  |
| 1178.999978 | 311.088122 | 7.02083E-06 | 0.008277553 |
| 1179.039978 | 310.01922  | 6.9967E-06  | 0.008249391 |
| 1179.079978 | 331.589165 | 7.48351E-06 | 0.008823652 |
| 1179.119978 | 359.687558 | 8.11765E-06 | 0.00957168  |
| 1179.159978 | 379.414379 | 8.56285E-06 | 0.010096975 |
| 1179.199978 | 422.075673 | 9.52566E-06 | 0.011232658 |
| 1179.239978 | 439.975199 | 9.92963E-06 | 0.011709414 |
| 1179.279978 | 436.071988 | 9.84154E-06 | 0.011605928 |
| 1179.319978 | 428.46837  | 9.66993E-06 | 0.011403947 |
| 1179.359978 | 388.62953  | 8.77083E-06 | 0.010343963 |
| 1179.399978 | 345.963861 | 7.80792E-06 | 0.009208664 |
| 1179.439978 | 307.836116 | 6.94743E-06 | 0.008194079 |
| 1179.479978 | 264.905614 | 5.97855E-06 | 0.007051581 |
| 1179.519978 | 230.903984 | 5.21118E-06 | 0.006146692 |
| 1179.559978 | 214.932204 | 4.85072E-06 | 0.005721716 |
| 1179.599978 | 201.766822 | 4.5536E-06  | 0.005371422 |
| 1179.639978 | 201.049416 | 4.53741E-06 | 0.005352505 |
| 1179.679978 | 225.509342 | 5.08943E-06 | 0.006003901 |
| 1179.719978 | 239.812237 | 5.41223E-06 | 0.006384914 |
| 1179.759978 | 239.564332 | 5.40663E-06 | 0.00637853  |
| 1179.799978 | 230.480675 | 5.20163E-06 | 0.00613688  |
| 1179.839978 | 210.036317 | 4.74023E-06 | 0.005592709 |
| 1179.879978 | 189.188593 | 4.26972E-06 | 0.005037761 |
| 1179.919978 | 203.736153 | 4.59804E-06 | 0.005425321 |
| 1179.959978 | 210.527077 | 4.7513E-06  | 0.005606347 |
| 1179.999978 | 243.623559 | 5.49824E-06 | 0.006487928 |
| 1180.039978 | 287.890745 | 6.49729E-06 | 0.007667066 |
| 1180.079978 | 294.90813  | 6.65567E-06 | 0.007854218 |
| 1180.119978 | 298.297403 | 6.73216E-06 | 0.007944753 |
| 1180.159978 | 328.532237 | 7.41451E-06 | 0.008750314 |
| 1180.199978 | 377.5059   | 8.51978E-06 | 0.010055047 |
| 1180.239978 | 402.632919 | 9.08686E-06 | 0.01072468  |
| 1180.279978 | 386.488915 | 8.72252E-06 | 0.010295012 |
| 1180.319978 | 352.005256 | 7.94427E-06 | 0.009376779 |
| 1180.359978 | 334.052017 | 7.53909E-06 | 0.008898839 |
| 1180.399978 | 301.11798  | 6.79581E-06 | 0.008021778 |

|             |            |             |             |
|-------------|------------|-------------|-------------|
| 1180.439978 | 278.789957 | 6.2919E-06  | 0.007427211 |
| 1180.479978 | 254.886341 | 5.75243E-06 | 0.006790628 |
| 1180.519978 | 233.918001 | 5.2792E-06  | 0.006232205 |
| 1180.559978 | 216.718726 | 4.89104E-06 | 0.005774166 |
| 1180.599978 | 179.261796 | 4.04569E-06 | 0.00477634  |
| 1180.639978 | 180.298429 | 4.06908E-06 | 0.004804124 |
| 1180.679978 | 195.034525 | 4.40166E-06 | 0.005196949 |
| 1180.719978 | 195.991728 | 4.42326E-06 | 0.005222632 |
| 1180.759978 | 206.138158 | 4.65225E-06 | 0.005493192 |
| 1180.799978 | 223.627156 | 5.04695E-06 | 0.005959442 |
| 1180.839978 | 223.523606 | 5.04462E-06 | 0.005956885 |
| 1180.879978 | 227.443372 | 5.13308E-06 | 0.006061552 |
| 1180.919978 | 248.812393 | 5.61535E-06 | 0.006631278 |
| 1180.959978 | 257.371629 | 5.80852E-06 | 0.006859629 |
| 1180.999978 | 251.875176 | 5.68447E-06 | 0.006713361 |
| 1181.039978 | 284.658833 | 6.42435E-06 | 0.007587418 |
| 1181.079978 | 332.298967 | 7.49952E-06 | 0.008857539 |
| 1181.119978 | 358.313103 | 8.08663E-06 | 0.009551277 |
| 1181.159978 | 377.768831 | 8.52572E-06 | 0.010070235 |
| 1181.199978 | 401.687581 | 9.06553E-06 | 0.010708203 |
| 1181.239978 | 445.554927 | 1.00556E-05 | 0.011878022 |
| 1181.279978 | 426.624713 | 9.62833E-06 | 0.011373748 |
| 1181.319978 | 363.838353 | 8.21132E-06 | 0.009700202 |
| 1181.359978 | 339.608416 | 7.66449E-06 | 0.00905452  |
| 1181.399978 | 300.710035 | 6.78661E-06 | 0.008017697 |
| 1181.439978 | 255.635955 | 5.76935E-06 | 0.006816138 |
| 1181.479978 | 226.971411 | 5.12243E-06 | 0.006052047 |
| 1181.519978 | 215.177445 | 4.85626E-06 | 0.005737763 |
| 1181.559978 | 212.029562 | 4.78521E-06 | 0.005654015 |
| 1181.599978 | 221.613319 | 5.0015E-06  | 0.005909777 |
| 1181.639978 | 215.577489 | 4.86528E-06 | 0.005749014 |
| 1181.679978 | 230.076005 | 5.19249E-06 | 0.006135867 |
| 1181.719978 | 251.594167 | 5.67813E-06 | 0.00670996  |
| 1181.759978 | 248.996164 | 5.6195E-06  | 0.006640896 |
| 1181.799978 | 244.767136 | 5.52405E-06 | 0.006528326 |
| 1181.839978 | 226.590319 | 5.11383E-06 | 0.006043726 |
| 1181.879978 | 225.472611 | 5.0886E-06  | 0.006014118 |
| 1181.919978 | 234.240943 | 5.28649E-06 | 0.00624821  |
| 1181.959978 | 226.87587  | 5.12027E-06 | 0.006051957 |
| 1181.999978 | 222.765427 | 5.02751E-06 | 0.005942511 |
| 1182.039978 | 254.024341 | 5.73298E-06 | 0.006776606 |
| 1182.079978 | 310.091642 | 6.99834E-06 | 0.008272593 |
| 1182.119978 | 333.87261  | 7.53504E-06 | 0.008907321 |
| 1182.159978 | 354.74366  | 8.00607E-06 | 0.009464456 |
| 1182.199978 | 379.424843 | 8.56309E-06 | 0.010123285 |
| 1182.239978 | 397.996418 | 8.98222E-06 | 0.010619145 |

|             |            |             |             |
|-------------|------------|-------------|-------------|
| 1182.279978 | 425.467667 | 9.60221E-06 | 0.011352504 |
| 1182.319978 | 444.691405 | 1.00361E-05 | 0.011865841 |
| 1182.359978 | 435.557494 | 9.82993E-06 | 0.011622511 |
| 1182.399978 | 385.873617 | 8.70863E-06 | 0.010297084 |
| 1182.439978 | 320.977818 | 7.24402E-06 | 0.008565622 |
| 1182.479978 | 270.576416 | 6.10653E-06 | 0.007220853 |
| 1182.519978 | 249.884508 | 5.63955E-06 | 0.006668875 |
| 1182.559978 | 230.335194 | 5.19834E-06 | 0.006147354 |
| 1182.599978 | 211.974478 | 4.78397E-06 | 0.005657521 |
| 1182.639978 | 201.937479 | 4.55745E-06 | 0.00538982  |
| 1182.679978 | 207.461153 | 4.68211E-06 | 0.005537437 |
| 1182.719978 | 220.876767 | 4.98488E-06 | 0.005895718 |
| 1182.759978 | 239.914975 | 5.41455E-06 | 0.006404109 |
| 1182.799978 | 232.97313  | 5.25788E-06 | 0.006219019 |
| 1182.839978 | 230.194001 | 5.19516E-06 | 0.006145041 |
| 1182.879978 | 259.757378 | 5.86236E-06 | 0.006934471 |
| 1182.919978 | 258.28646  | 5.82917E-06 | 0.006895436 |
| 1182.959978 | 241.95109  | 5.4605E-06  | 0.006459552 |
| 1182.999978 | 259.949879 | 5.86671E-06 | 0.006940314 |
| 1183.039978 | 277.031073 | 6.25221E-06 | 0.007396609 |
| 1183.079978 | 304.695041 | 6.87654E-06 | 0.0081355   |
| 1183.119978 | 347.412521 | 7.84062E-06 | 0.00927639  |
| 1183.159978 | 394.729436 | 8.90849E-06 | 0.010540173 |
| 1183.199978 | 432.427271 | 9.75928E-06 | 0.011547181 |
| 1183.239978 | 457.719529 | 1.03301E-05 | 0.012222978 |
| 1183.279978 | 453.33163  | 1.02311E-05 | 0.012106213 |
| 1183.319978 | 429.164286 | 9.68564E-06 | 0.011461211 |
| 1183.359978 | 380.478095 | 8.58686E-06 | 0.010161347 |
| 1183.399978 | 343.254658 | 7.74678E-06 | 0.009167539 |
| 1183.439978 | 299.673801 | 6.76322E-06 | 0.008003865 |
| 1183.479978 | 245.727281 | 5.54572E-06 | 0.006563251 |
| 1183.519978 | 206.865678 | 4.66867E-06 | 0.005525464 |
| 1183.559978 | 188.645034 | 4.25746E-06 | 0.005038954 |
| 1183.599978 | 195.566258 | 4.41366E-06 | 0.005224006 |
| 1183.639978 | 208.304087 | 4.70113E-06 | 0.005564449 |
| 1183.679978 | 236.340046 | 5.33387E-06 | 0.00631359  |
| 1183.719978 | 257.012182 | 5.80041E-06 | 0.006866058 |
| 1183.759978 | 265.998763 | 6.00322E-06 | 0.007106373 |
| 1183.799978 | 249.141998 | 5.62279E-06 | 0.006656256 |
| 1183.839978 | 234.667284 | 5.29611E-06 | 0.006269751 |
| 1183.879978 | 243.737873 | 5.50082E-06 | 0.006512316 |
| 1183.919978 | 241.147199 | 5.44236E-06 | 0.006443314 |
| 1183.959978 | 232.826002 | 5.25456E-06 | 0.006221187 |
| 1183.999978 | 227.318238 | 5.13026E-06 | 0.006074223 |
| 1184.039978 | 247.287617 | 5.58094E-06 | 0.006608053 |
| 1184.079978 | 303.13155  | 6.84126E-06 | 0.008100595 |

|             |            |             |             |
|-------------|------------|-------------|-------------|
| 1184.119978 | 353.666009 | 7.98175E-06 | 0.009451349 |
| 1184.159978 | 380.461856 | 8.58649E-06 | 0.010167783 |
| 1184.199978 | 402.506511 | 9.08401E-06 | 0.010757286 |
| 1184.239978 | 399.128852 | 9.00778E-06 | 0.010667376 |
| 1184.279978 | 378.992394 | 8.55333E-06 | 0.010129538 |
| 1184.319978 | 376.265559 | 8.49179E-06 | 0.010056996 |
| 1184.359978 | 361.339986 | 8.15494E-06 | 0.009658385 |
| 1184.399978 | 327.878342 | 7.39976E-06 | 0.008764273 |
| 1184.439978 | 307.765231 | 6.94583E-06 | 0.008226922 |
| 1184.479978 | 263.107835 | 5.93798E-06 | 0.007033415 |
| 1184.519978 | 215.286829 | 4.85872E-06 | 0.005755255 |
| 1184.559978 | 188.923155 | 4.26373E-06 | 0.005050647 |
| 1184.599978 | 194.201789 | 4.38286E-06 | 0.00519194  |
| 1184.639978 | 199.506271 | 4.50258E-06 | 0.005333935 |
| 1184.679978 | 204.513038 | 4.61557E-06 | 0.005467979 |
| 1184.719978 | 220.70465  | 4.981E-06   | 0.005901086 |
| 1184.759978 | 236.05215  | 5.32737E-06 | 0.006311653 |
| 1184.799978 | 269.718212 | 6.08716E-06 | 0.007212072 |
| 1184.839978 | 271.623363 | 6.13016E-06 | 0.00726326  |
| 1184.879978 | 266.17463  | 6.00719E-06 | 0.0071178   |
| 1184.919978 | 266.193856 | 6.00762E-06 | 0.007118554 |
| 1184.959978 | 254.899198 | 5.75272E-06 | 0.006816743 |
| 1184.999978 | 261.803162 | 5.90853E-06 | 0.007001611 |
| 1185.039978 | 303.595228 | 6.85172E-06 | 0.008119564 |
| 1185.079978 | 363.970282 | 8.2143E-06  | 0.009734605 |
| 1185.119978 | 414.041441 | 9.34434E-06 | 0.011074162 |
| 1185.159978 | 423.919093 | 9.56726E-06 | 0.011338738 |
| 1185.199978 | 425.277766 | 9.59793E-06 | 0.011375463 |
| 1185.239978 | 449.107431 | 1.01357E-05 | 0.012013271 |
| 1185.279978 | 474.759326 | 1.07147E-05 | 0.012699868 |
| 1185.319978 | 447.99673  | 1.01107E-05 | 0.01198437  |
| 1185.359978 | 388.982797 | 8.7788E-06  | 0.010406038 |
| 1185.399978 | 348.629543 | 7.86808E-06 | 0.009326826 |
| 1185.439978 | 294.613166 | 6.64901E-06 | 0.007882001 |
| 1185.479978 | 225.762966 | 5.09516E-06 | 0.006040205 |
| 1185.519978 | 191.400061 | 4.31963E-06 | 0.005121011 |
| 1185.559978 | 190.886361 | 4.30804E-06 | 0.005107439 |
| 1185.599978 | 212.011592 | 4.78481E-06 | 0.005672866 |
| 1185.639978 | 233.511653 | 5.27003E-06 | 0.006248362 |
| 1185.679978 | 255.266366 | 5.76101E-06 | 0.00683071  |
| 1185.719978 | 249.967415 | 5.64142E-06 | 0.00668914  |
| 1185.759978 | 226.951097 | 5.12197E-06 | 0.006073427 |
| 1185.799978 | 205.995085 | 4.64902E-06 | 0.00551281  |
| 1185.839978 | 195.645056 | 4.41544E-06 | 0.005236001 |
| 1185.879978 | 198.495511 | 4.47977E-06 | 0.005312466 |
| 1185.919978 | 212.698174 | 4.8003E-06  | 0.005692773 |

|             |            |             |             |
|-------------|------------|-------------|-------------|
| 1185.959978 | 219.428398 | 4.95219E-06 | 0.005873103 |
| 1185.999978 | 231.444379 | 5.22338E-06 | 0.006194925 |
| 1186.039978 | 249.251756 | 5.62526E-06 | 0.006671789 |
| 1186.079978 | 271.231522 | 6.12132E-06 | 0.007260372 |
| 1186.119978 | 284.402084 | 6.41856E-06 | 0.007613181 |
| 1186.159978 | 288.396558 | 6.50871E-06 | 0.00772037  |
| 1186.199978 | 323.227711 | 7.2948E-06  | 0.008653091 |
| 1186.239978 | 349.731324 | 7.89295E-06 | 0.009362931 |
| 1186.279978 | 329.639538 | 7.43951E-06 | 0.008825336 |
| 1186.319978 | 327.311896 | 7.38697E-06 | 0.008763314 |
| 1186.359978 | 344.510792 | 7.77513E-06 | 0.009224102 |
| 1186.399978 | 315.825405 | 7.12774E-06 | 0.00845635  |
| 1186.439978 | 252.895054 | 5.70749E-06 | 0.006771593 |
| 1186.479978 | 229.202041 | 5.17277E-06 | 0.006137389 |
| 1186.519978 | 210.418826 | 4.74886E-06 | 0.005634617 |
| 1186.559978 | 195.805702 | 4.41906E-06 | 0.005243482 |
| 1186.599978 | 211.57888  | 4.77504E-06 | 0.005666063 |
| 1186.639978 | 225.310681 | 5.08495E-06 | 0.006034003 |
| 1186.679978 | 233.997147 | 5.28099E-06 | 0.006266845 |
| 1186.719978 | 234.444042 | 5.29108E-06 | 0.006279025 |
| 1186.759978 | 233.225462 | 5.26357E-06 | 0.006246599 |
| 1186.799978 | 228.430843 | 5.15537E-06 | 0.006118388 |
| 1186.839978 | 208.514182 | 4.70587E-06 | 0.00558512  |
| 1186.879978 | 211.958746 | 4.78361E-06 | 0.005677575 |
| 1186.919978 | 240.040459 | 5.41738E-06 | 0.006429995 |
| 1186.959978 | 250.754483 | 5.65918E-06 | 0.006717219 |
| 1186.999978 | 260.285524 | 5.87428E-06 | 0.006972772 |
| 1187.039978 | 297.89428  | 6.72306E-06 | 0.00798054  |
| 1187.079978 | 334.931725 | 7.55894E-06 | 0.008973069 |
| 1187.119978 | 377.356788 | 8.51642E-06 | 0.010110009 |
| 1187.159978 | 423.996721 | 9.56902E-06 | 0.011359952 |
| 1187.199978 | 411.789045 | 9.29351E-06 | 0.011033249 |
| 1187.239978 | 396.02049  | 8.93763E-06 | 0.010611113 |
| 1187.279978 | 412.940589 | 9.31949E-06 | 0.011064849 |
| 1187.319978 | 397.487409 | 8.97074E-06 | 0.010651135 |
| 1187.359978 | 347.481809 | 7.84218E-06 | 0.009311491 |
| 1187.399978 | 306.346548 | 6.91381E-06 | 0.008209464 |
| 1187.439978 | 260.974548 | 5.88983E-06 | 0.006993822 |
| 1187.479978 | 224.641445 | 5.06984E-06 | 0.006020339 |
| 1187.519978 | 196.586925 | 4.43669E-06 | 0.005268662 |
| 1187.559978 | 184.481979 | 4.1635E-06  | 0.004944408 |
| 1187.599978 | 180.180584 | 4.06642E-06 | 0.004829286 |
| 1187.639978 | 207.854744 | 4.69099E-06 | 0.00557121  |
| 1187.679978 | 230.179262 | 5.19483E-06 | 0.00616979  |
| 1187.719978 | 242.928423 | 5.48256E-06 | 0.006511741 |
| 1187.759978 | 263.681226 | 5.95092E-06 | 0.007068262 |

|             |            |             |             |
|-------------|------------|-------------|-------------|
| 1187.799978 | 253.049049 | 5.71096E-06 | 0.006783484 |
| 1187.839978 | 227.352582 | 5.13103E-06 | 0.006094844 |
| 1187.879978 | 216.803894 | 4.89296E-06 | 0.005812251 |
| 1187.919978 | 214.773787 | 4.84715E-06 | 0.005758021 |
| 1187.959978 | 220.531668 | 4.97709E-06 | 0.005912587 |
| 1187.999978 | 232.726159 | 5.25231E-06 | 0.006239739 |
| 1188.039978 | 249.316359 | 5.62672E-06 | 0.006684772 |
| 1188.079978 | 268.946453 | 6.06975E-06 | 0.007211345 |
| 1188.119978 | 299.892011 | 6.76814E-06 | 0.008041368 |
| 1188.159978 | 322.410329 | 7.27635E-06 | 0.00864547  |
| 1188.199978 | 336.562895 | 7.59576E-06 | 0.009025277 |
| 1188.239978 | 343.919212 | 7.76178E-06 | 0.009222854 |
| 1188.279978 | 352.655649 | 7.95895E-06 | 0.009457457 |
| 1188.319978 | 359.399912 | 8.11116E-06 | 0.009638648 |
| 1188.359978 | 357.16184  | 8.06065E-06 | 0.009578948 |
| 1188.399978 | 341.93894  | 7.71709E-06 | 0.009170984 |
| 1188.439978 | 311.930255 | 7.03983E-06 | 0.008366417 |
| 1188.479978 | 280.561921 | 6.33189E-06 | 0.007525327 |
| 1188.519978 | 268.424227 | 6.05796E-06 | 0.007200008 |
| 1188.559978 | 250.520427 | 5.6539E-06  | 0.006719996 |
| 1188.599978 | 219.776399 | 4.96005E-06 | 0.005895512 |
| 1188.639978 | 203.09441  | 4.58356E-06 | 0.0054482   |
| 1188.679978 | 213.367522 | 4.81541E-06 | 0.005723979 |
| 1188.719978 | 221.914623 | 5.0083E-06  | 0.005953471 |
| 1188.759978 | 213.27354  | 4.81329E-06 | 0.005721843 |
| 1188.799978 | 205.712825 | 4.64265E-06 | 0.005519185 |
| 1188.839978 | 227.792161 | 5.14095E-06 | 0.006111769 |
| 1188.879978 | 241.036644 | 5.43986E-06 | 0.006467342 |
| 1188.919978 | 243.001103 | 5.4842E-06  | 0.006520271 |
| 1188.959978 | 233.945428 | 5.27982E-06 | 0.006277498 |
| 1188.999978 | 258.29961  | 5.82946E-06 | 0.006931231 |
| 1189.039978 | 303.452584 | 6.8485E-06  | 0.008143143 |
| 1189.079978 | 330.452106 | 7.45784E-06 | 0.008867973 |
| 1189.119978 | 374.985723 | 8.46291E-06 | 0.01006341  |
| 1189.159978 | 421.309822 | 9.50838E-06 | 0.01130698  |
| 1189.199978 | 424.499692 | 9.58037E-06 | 0.011392972 |
| 1189.239978 | 417.511336 | 9.42265E-06 | 0.011205791 |
| 1189.279978 | 413.438468 | 9.33073E-06 | 0.011096851 |
| 1189.319978 | 405.140045 | 9.14345E-06 | 0.010874484 |
| 1189.359978 | 397.656175 | 8.97455E-06 | 0.010673966 |
| 1189.399978 | 362.417555 | 8.17926E-06 | 0.009728411 |
| 1189.439978 | 305.949039 | 6.90484E-06 | 0.008212897 |
| 1189.479978 | 247.981308 | 5.59659E-06 | 0.006657035 |
| 1189.519978 | 232.218967 | 5.24086E-06 | 0.006234106 |
| 1189.559978 | 219.362425 | 4.9507E-06  | 0.00588916  |
| 1189.599978 | 209.717986 | 4.73304E-06 | 0.005630428 |

|             |            |             |             |
|-------------|------------|-------------|-------------|
| 1189.639978 | 218.013869 | 4.92027E-06 | 0.005853349 |
| 1189.679978 | 217.011407 | 4.89765E-06 | 0.00582663  |
| 1189.719978 | 250.270509 | 5.64826E-06 | 0.006719844 |
| 1189.759978 | 285.533796 | 6.4441E-06  | 0.007666932 |
| 1189.799978 | 258.319978 | 5.82992E-06 | 0.006936441 |
| 1189.839978 | 221.393077 | 4.99653E-06 | 0.005945075 |
| 1189.879978 | 232.455895 | 5.24621E-06 | 0.006242355 |
| 1189.919978 | 228.589455 | 5.15895E-06 | 0.006138732 |
| 1189.959978 | 229.365073 | 5.17645E-06 | 0.006159769 |
| 1189.999978 | 233.685178 | 5.27395E-06 | 0.006275999 |
| 1190.039978 | 263.756454 | 5.95262E-06 | 0.007083851 |
| 1190.079978 | 289.404042 | 6.53145E-06 | 0.007772943 |
| 1190.119978 | 301.436398 | 6.803E-06   | 0.008096386 |
| 1190.159978 | 332.049233 | 7.49389E-06 | 0.008918926 |
| 1190.199978 | 356.77243  | 8.05186E-06 | 0.00958332  |
| 1190.239978 | 383.91247  | 8.66437E-06 | 0.010312679 |
| 1190.279978 | 407.97036  | 9.20732E-06 | 0.010959292 |
| 1190.319978 | 388.341873 | 8.76434E-06 | 0.010432363 |
| 1190.359978 | 361.426098 | 8.15688E-06 | 0.009709628 |
| 1190.399978 | 319.580984 | 7.2125E-06  | 0.008585757 |
| 1190.439978 | 275.039868 | 6.20727E-06 | 0.007389378 |
| 1190.479978 | 246.070312 | 5.55346E-06 | 0.006611288 |
| 1190.519978 | 224.121572 | 5.05811E-06 | 0.006021783 |
| 1190.559978 | 217.448722 | 4.90751E-06 | 0.005842691 |
| 1190.599978 | 200.629906 | 4.52794E-06 | 0.005390962 |
| 1190.639978 | 187.136315 | 4.22341E-06 | 0.005028556 |
| 1190.679978 | 200.080449 | 4.51554E-06 | 0.00537656  |
| 1190.719978 | 231.119305 | 5.21604E-06 | 0.006210844 |
| 1190.759978 | 252.290002 | 5.69383E-06 | 0.00677999  |
| 1190.799978 | 267.200508 | 6.03034E-06 | 0.007180933 |
| 1190.839978 | 287.320783 | 6.48443E-06 | 0.007721918 |
| 1190.879978 | 284.874549 | 6.42922E-06 | 0.007656431 |
| 1190.919978 | 273.074709 | 6.16292E-06 | 0.00733954  |
| 1190.959978 | 274.725695 | 6.20018E-06 | 0.007384162 |
| 1190.999978 | 271.038693 | 6.11697E-06 | 0.007285306 |
| 1191.039978 | 287.584133 | 6.49037E-06 | 0.007730294 |
| 1191.079978 | 319.400034 | 7.20841E-06 | 0.008585797 |
| 1191.119978 | 339.205586 | 7.6554E-06  | 0.009118497 |
| 1191.159978 | 405.241585 | 9.14574E-06 | 0.010894037 |
| 1191.199978 | 501.471333 | 1.13175E-05 | 0.013481417 |
| 1191.239978 | 551.639659 | 1.24497E-05 | 0.014830626 |
| 1191.279978 | 584.509911 | 1.31916E-05 | 0.015714859 |
| 1191.319978 | 622.134332 | 1.40407E-05 | 0.016726973 |
| 1191.359978 | 612.647583 | 1.38266E-05 | 0.016472461 |
| 1191.399978 | 525.412716 | 1.18578E-05 | 0.014127422 |
| 1191.439978 | 409.71019  | 9.24659E-06 | 0.011016755 |

|             |            |             |             |
|-------------|------------|-------------|-------------|
| 1191.479978 | 334.808529 | 7.55616E-06 | 0.009003016 |
| 1191.519978 | 287.692017 | 6.49281E-06 | 0.007736311 |
| 1191.559978 | 265.997203 | 6.00319E-06 | 0.007153157 |
| 1191.599978 | 248.852423 | 5.61625E-06 | 0.006692326 |
| 1191.639978 | 223.682172 | 5.0482E-06  | 0.006015631 |
| 1191.679978 | 224.042955 | 5.05634E-06 | 0.006025536 |
| 1191.719978 | 238.534261 | 5.38339E-06 | 0.006415489 |
| 1191.759978 | 233.603129 | 5.2721E-06  | 0.006283074 |
| 1191.799978 | 222.480158 | 5.02107E-06 | 0.005984108 |
| 1191.839978 | 224.965382 | 5.07716E-06 | 0.006051157 |
| 1191.879978 | 216.243535 | 4.88032E-06 | 0.00581675  |
| 1191.919978 | 191.445688 | 4.32066E-06 | 0.005149884 |
| 1191.959978 | 189.358745 | 4.27356E-06 | 0.005093916 |
| 1191.999978 | 208.668419 | 4.70936E-06 | 0.005613552 |
| 1192.039978 | 234.534364 | 5.29311E-06 | 0.006309603 |
| 1192.079978 | 282.895458 | 6.38456E-06 | 0.007610902 |
| 1192.119978 | 330.48887  | 7.45867E-06 | 0.008891634 |
| 1192.159978 | 392.484033 | 8.85782E-06 | 0.010559936 |
| 1192.199978 | 435.781972 | 9.83499E-06 | 0.011725277 |
| 1192.239978 | 462.168367 | 1.04305E-05 | 0.012435655 |
| 1192.279978 | 478.124501 | 1.07906E-05 | 0.012865421 |
| 1192.319978 | 444.100839 | 1.00227E-05 | 0.01195031  |
| 1192.359978 | 408.162091 | 9.21165E-06 | 0.010983603 |
| 1192.399978 | 387.902945 | 8.75443E-06 | 0.010438781 |
| 1192.439978 | 361.184993 | 8.15144E-06 | 0.009720106 |
| 1192.479978 | 306.982693 | 6.92817E-06 | 0.008261706 |
| 1192.519978 | 255.554338 | 5.76751E-06 | 0.006877865 |
| 1192.559978 | 237.420187 | 5.35824E-06 | 0.006390026 |
| 1192.599978 | 249.032911 | 5.62033E-06 | 0.006702801 |
| 1192.639978 | 255.82811  | 5.77368E-06 | 0.006885926 |
| 1192.679978 | 273.452648 | 6.17145E-06 | 0.007360559 |
| 1192.719978 | 288.064751 | 6.50122E-06 | 0.007754135 |
| 1192.759978 | 281.557953 | 6.35437E-06 | 0.007579239 |
| 1192.799978 | 248.583213 | 5.61018E-06 | 0.006691819 |
| 1192.839978 | 207.772503 | 4.68914E-06 | 0.005593389 |
| 1192.879978 | 200.259215 | 4.51957E-06 | 0.005391306 |
| 1192.919978 | 220.355236 | 4.97311E-06 | 0.005932523 |
| 1192.959978 | 231.793988 | 5.23127E-06 | 0.006240693 |
| 1192.999978 | 234.310256 | 5.28806E-06 | 0.006308651 |
| 1193.039978 | 262.506901 | 5.92442E-06 | 0.007068064 |
| 1193.079978 | 316.935456 | 7.15279E-06 | 0.008533853 |
| 1193.119978 | 377.860755 | 8.52779E-06 | 0.010174678 |
| 1193.159978 | 439.127118 | 9.91049E-06 | 0.011824797 |
| 1193.199978 | 499.434862 | 1.12715E-05 | 0.013449212 |
| 1193.239978 | 514.219137 | 1.16052E-05 | 0.0138478   |
| 1193.279978 | 481.234861 | 1.08608E-05 | 0.012959976 |



|             |            |             |             |
|-------------|------------|-------------|-------------|
| 1193.319978 | 454.290058 | 1.02527E-05 | 0.012234744 |
| 1193.359978 | 407.629125 | 9.19962E-06 | 0.01097846  |
| 1193.399978 | 362.773376 | 8.18729E-06 | 0.009770711 |
| 1193.439978 | 312.792035 | 7.05928E-06 | 0.008424828 |
| 1193.479978 | 262.278119 | 5.91925E-06 | 0.007064509 |
| 1193.519978 | 239.963996 | 5.41565E-06 | 0.00646369  |
| 1193.559978 | 233.247767 | 5.26408E-06 | 0.006282992 |
| 1193.599978 | 212.091634 | 4.78661E-06 | 0.005713301 |
| 1193.639978 | 213.134395 | 4.81015E-06 | 0.005741583 |
| 1193.679978 | 212.330141 | 4.792E-06   | 0.005720109 |
| 1193.719978 | 222.056762 | 5.01151E-06 | 0.005982342 |
| 1193.759978 | 236.074521 | 5.32787E-06 | 0.006360202 |
| 1193.799978 | 233.371593 | 5.26687E-06 | 0.006287591 |
| 1193.839978 | 224.890781 | 5.07547E-06 | 0.006059301 |
| 1193.879978 | 228.931021 | 5.16665E-06 | 0.006168365 |
| 1193.919978 | 243.566248 | 5.49695E-06 | 0.00656292  |
| 1193.959978 | 267.392979 | 6.03469E-06 | 0.007205175 |
| 1193.999978 | 278.016426 | 6.27444E-06 | 0.007491685 |
| 1194.039978 | 274.25927  | 6.18965E-06 | 0.007390689 |
| 1194.079978 | 275.81255  | 6.22471E-06 | 0.007432796 |
| 1194.119978 | 301.012055 | 6.79342E-06 | 0.008112162 |
| 1194.159978 | 338.368697 | 7.63651E-06 | 0.009119215 |
| 1194.199978 | 376.767173 | 8.50311E-06 | 0.010154414 |
| 1194.239978 | 418.449909 | 9.44383E-06 | 0.011278201 |
| 1194.279978 | 431.383412 | 9.73572E-06 | 0.011627179 |
| 1194.319978 | 432.194926 | 9.75404E-06 | 0.011649442 |
| 1194.359978 | 399.84453  | 9.02393E-06 | 0.010777826 |
| 1194.399978 | 337.156017 | 7.60914E-06 | 0.009088359 |
| 1194.439978 | 291.523924 | 6.57929E-06 | 0.007858566 |
| 1194.479978 | 244.156891 | 5.51028E-06 | 0.00658192  |
| 1194.519978 | 228.20453  | 5.15026E-06 | 0.006152087 |
| 1194.559978 | 227.071692 | 5.12469E-06 | 0.006121752 |
| 1194.599978 | 213.396546 | 4.81606E-06 | 0.005753269 |
| 1194.639978 | 231.950852 | 5.23481E-06 | 0.00625371  |
| 1194.679978 | 263.907559 | 5.95603E-06 | 0.007115545 |
| 1194.719978 | 266.118249 | 6.00592E-06 | 0.00717539  |
| 1194.759978 | 257.351205 | 5.80806E-06 | 0.006939236 |
| 1194.799978 | 290.096917 | 6.54708E-06 | 0.007822455 |
| 1194.839978 | 306.252379 | 6.91169E-06 | 0.008258363 |
| 1194.879978 | 278.637136 | 6.28845E-06 | 0.007513945 |
| 1194.919978 | 246.084752 | 5.55379E-06 | 0.006636335 |
| 1194.959978 | 253.804098 | 5.728E-06   | 0.006844737 |
| 1194.999978 | 272.157363 | 6.14221E-06 | 0.007339944 |
| 1195.039978 | 303.278197 | 6.84457E-06 | 0.008179531 |
| 1195.079978 | 353.876827 | 7.98651E-06 | 0.009544515 |
| 1195.119978 | 405.928667 | 9.16124E-06 | 0.010948786 |

|             |            |             |             |
|-------------|------------|-------------|-------------|
| 1195.159978 | 439.19723  | 9.91207E-06 | 0.011846509 |
| 1195.199978 | 469.560429 | 1.05973E-05 | 0.012665922 |
| 1195.239978 | 481.404787 | 1.08646E-05 | 0.012985847 |
| 1195.279978 | 462.706243 | 1.04426E-05 | 0.012481873 |
| 1195.319978 | 418.770511 | 9.45107E-06 | 0.011297049 |
| 1195.359978 | 377.216957 | 8.51326E-06 | 0.010176412 |
| 1195.399978 | 338.66395  | 7.64317E-06 | 0.00913665  |
| 1195.439978 | 297.072537 | 6.70451E-06 | 0.008014843 |
| 1195.479978 | 247.179797 | 5.5785E-06  | 0.00666899  |
| 1195.519978 | 222.01558  | 5.01058E-06 | 0.005990251 |
| 1195.559978 | 220.523617 | 4.97691E-06 | 0.005950195 |
| 1195.599978 | 207.597533 | 4.68519E-06 | 0.00560161  |
| 1195.639978 | 218.006663 | 4.92011E-06 | 0.005882676 |
| 1195.679978 | 253.977555 | 5.73192E-06 | 0.006853542 |
| 1195.719978 | 272.258901 | 6.1445E-06  | 0.007347106 |
| 1195.759978 | 271.33251  | 6.1236E-06  | 0.007322352 |
| 1195.799978 | 249.789675 | 5.63741E-06 | 0.006741209 |
| 1195.839978 | 232.544559 | 5.24821E-06 | 0.006276015 |
| 1195.879978 | 246.721113 | 5.56815E-06 | 0.006658841 |
| 1195.919978 | 238.225075 | 5.37641E-06 | 0.006429754 |
| 1195.959978 | 231.359698 | 5.22147E-06 | 0.006244665 |
| 1195.999978 | 248.994512 | 5.61946E-06 | 0.006720873 |
| 1196.039978 | 272.051679 | 6.13983E-06 | 0.007343479 |
| 1196.079978 | 310.948716 | 7.01768E-06 | 0.008393706 |
| 1196.119978 | 347.324861 | 7.83864E-06 | 0.009375952 |
| 1196.159978 | 407.31413  | 9.19251E-06 | 0.010995716 |
| 1196.199978 | 436.724077 | 9.85625E-06 | 0.011790051 |
| 1196.239978 | 437.288309 | 9.86899E-06 | 0.011805678 |
| 1196.279978 | 420.763224 | 9.49604E-06 | 0.011359922 |
| 1196.319978 | 395.320262 | 8.92183E-06 | 0.010673361 |
| 1196.359978 | 367.732087 | 8.2992E-06  | 0.009928832 |
| 1196.399978 | 356.734585 | 8.051E-06   | 0.009632219 |
| 1196.439978 | 333.851163 | 7.53456E-06 | 0.009014644 |
| 1196.479978 | 287.26353  | 6.48314E-06 | 0.007756945 |
| 1196.519978 | 263.809659 | 5.95382E-06 | 0.00712386  |
| 1196.559978 | 241.168459 | 5.44284E-06 | 0.00651268  |
| 1196.599978 | 220.217044 | 4.96999E-06 | 0.005947092 |
| 1196.639978 | 230.159956 | 5.19439E-06 | 0.006215814 |
| 1196.679978 | 241.367624 | 5.44733E-06 | 0.006518712 |
| 1196.719978 | 260.189137 | 5.87211E-06 | 0.007027267 |
| 1196.759978 | 277.781546 | 6.26914E-06 | 0.007502659 |
| 1196.799978 | 303.173798 | 6.84221E-06 | 0.008188757 |
| 1196.839978 | 300.918806 | 6.79132E-06 | 0.008128121 |
| 1196.879978 | 284.680777 | 6.42485E-06 | 0.007689773 |
| 1196.919978 | 242.674187 | 5.47682E-06 | 0.006555313 |
| 1196.959978 | 228.323009 | 5.15293E-06 | 0.006167854 |

|             |            |             |             |
|-------------|------------|-------------|-------------|
| 1196.999978 | 269.929594 | 6.09193E-06 | 0.007292046 |
| 1197.039978 | 311.697463 | 7.03458E-06 | 0.008420671 |
| 1197.079978 | 354.042177 | 7.99024E-06 | 0.009564955 |
| 1197.119978 | 411.135344 | 9.27875E-06 | 0.011107779 |
| 1197.159978 | 422.49982  | 9.53523E-06 | 0.011415199 |
| 1197.199978 | 420.798877 | 9.49684E-06 | 0.011369622 |
| 1197.239978 | 409.119868 | 9.23327E-06 | 0.011054435 |
| 1197.279978 | 394.934954 | 8.91313E-06 | 0.010671514 |
| 1197.319978 | 378.134583 | 8.53397E-06 | 0.010217894 |
| 1197.359978 | 353.742608 | 7.98348E-06 | 0.009559097 |
| 1197.399978 | 317.001782 | 7.15429E-06 | 0.008566545 |
| 1197.439978 | 291.372068 | 6.57586E-06 | 0.0078742   |
| 1197.479978 | 254.113351 | 5.73498E-06 | 0.006867529 |
| 1197.519978 | 213.589374 | 4.82041E-06 | 0.005772543 |
| 1197.559978 | 203.857568 | 4.60078E-06 | 0.005509712 |
| 1197.599978 | 213.923339 | 4.82795E-06 | 0.005781955 |
| 1197.639978 | 219.671634 | 4.95768E-06 | 0.005937519 |
| 1197.679978 | 224.201817 | 5.05992E-06 | 0.006060168 |
| 1197.719978 | 233.706747 | 5.27444E-06 | 0.006317297 |
| 1197.759978 | 220.895965 | 4.98531E-06 | 0.00597121  |
| 1197.799978 | 206.873164 | 4.66884E-06 | 0.005592335 |
| 1197.839978 | 224.752551 | 5.07235E-06 | 0.006075866 |
| 1197.879978 | 243.68618  | 5.49966E-06 | 0.00658793  |
| 1197.919978 | 231.68684  | 5.22885E-06 | 0.006263743 |
| 1197.959978 | 223.56863  | 5.04563E-06 | 0.006044466 |
| 1197.999978 | 238.883289 | 5.39126E-06 | 0.006458733 |
| 1198.039978 | 246.885897 | 5.57187E-06 | 0.006675324 |
| 1198.079978 | 257.67532  | 5.81537E-06 | 0.006967282 |
| 1198.119978 | 281.096135 | 6.34395E-06 | 0.007600811 |
| 1198.159978 | 331.340941 | 7.4779E-06  | 0.008959725 |
| 1198.199978 | 393.177328 | 8.87346E-06 | 0.010632185 |
| 1198.239978 | 408.969096 | 9.22986E-06 | 0.011059591 |
| 1198.279978 | 403.210258 | 9.09989E-06 | 0.010904221 |
| 1198.319978 | 395.188179 | 8.91885E-06 | 0.010687632 |
| 1198.359978 | 348.184135 | 7.85803E-06 | 0.00941675  |
| 1198.399978 | 276.707454 | 6.2449E-06  | 0.00748389  |
| 1198.439978 | 244.089476 | 5.50876E-06 | 0.006601918 |
| 1198.479978 | 247.069076 | 5.576E-06   | 0.00668273  |
| 1198.519978 | 260.899812 | 5.88815E-06 | 0.00705706  |
| 1198.559978 | 248.138407 | 5.60014E-06 | 0.006712102 |
| 1198.599978 | 215.206038 | 4.8569E-06  | 0.005821481 |
| 1198.639978 | 214.055025 | 4.83092E-06 | 0.005790538 |
| 1198.679978 | 235.74027  | 5.32033E-06 | 0.006377372 |
| 1198.719978 | 242.784517 | 5.47931E-06 | 0.006568156 |
| 1198.759978 | 218.751782 | 4.93692E-06 | 0.005918186 |
| 1198.799978 | 214.192106 | 4.83402E-06 | 0.00579502  |

|             |            |             |             |
|-------------|------------|-------------|-------------|
| 1198.839978 | 244.179324 | 5.51079E-06 | 0.006606552 |
| 1198.879978 | 247.248049 | 5.58004E-06 | 0.006689803 |
| 1198.919978 | 237.331617 | 5.35624E-06 | 0.006421708 |
| 1198.959978 | 249.444655 | 5.62962E-06 | 0.006749687 |
| 1198.999978 | 253.679964 | 5.7252E-06  | 0.006864519 |
| 1199.039978 | 289.095505 | 6.52448E-06 | 0.007823116 |
| 1199.079978 | 313.249671 | 7.06961E-06 | 0.008477026 |
| 1199.119978 | 323.57112  | 7.30255E-06 | 0.008756633 |
| 1199.159978 | 328.686698 | 7.418E-06   | 0.00889537  |
| 1199.199978 | 368.578819 | 8.31831E-06 | 0.009975318 |
| 1199.239978 | 369.547997 | 8.34018E-06 | 0.010001882 |
| 1199.279978 | 360.841688 | 8.14369E-06 | 0.00976657  |
| 1199.319978 | 358.454212 | 8.08981E-06 | 0.009702273 |
| 1199.359978 | 347.720579 | 7.84757E-06 | 0.00941206  |
| 1199.399978 | 308.980263 | 6.97325E-06 | 0.008363721 |
| 1199.439978 | 262.826769 | 5.93163E-06 | 0.007114639 |
| 1199.479978 | 234.26105  | 5.28695E-06 | 0.006341585 |
| 1199.519978 | 207.512134 | 4.68326E-06 | 0.005617664 |
| 1199.559978 | 187.415303 | 4.2297E-06  | 0.005073782 |
| 1199.599978 | 189.161502 | 4.26911E-06 | 0.005121226 |
| 1199.639978 | 202.529404 | 4.57081E-06 | 0.005483322 |
| 1199.679978 | 205.027786 | 4.62719E-06 | 0.005551149 |
| 1199.719978 | 221.898063 | 5.00793E-06 | 0.006008114 |
| 1199.759978 | 232.594243 | 5.24933E-06 | 0.006297934 |
| 1199.799978 | 246.395465 | 5.5608E-06  | 0.006671851 |
| 1199.839978 | 248.131702 | 5.59999E-06 | 0.006719088 |
| 1199.879978 | 225.287183 | 5.08442E-06 | 0.006100691 |
| 1199.919978 | 193.066469 | 4.35724E-06 | 0.005228341 |
| 1199.959978 | 198.628441 | 4.48277E-06 | 0.005379141 |
| 1199.999978 | 215.480711 | 4.8631E-06  | 0.005835719 |
| 1200.039978 | 229.874327 | 5.18794E-06 | 0.006225739 |
| 1200.079978 | 283.16805  | 6.39071E-06 | 0.007669361 |
| 1200.119978 | 335.149036 | 7.56385E-06 | 0.009077524 |
| 1200.159978 | 353.426529 | 7.97634E-06 | 0.009572889 |
| 1200.199978 | 369.580983 | 8.34093E-06 | 0.010010782 |
| 1200.239978 | 383.616623 | 8.65769E-06 | 0.010391309 |
| 1200.279978 | 355.87636  | 8.03163E-06 | 0.009640209 |
| 1200.319978 | 317.293611 | 7.16087E-06 | 0.008595341 |
| 1200.359978 | 277.194138 | 6.25589E-06 | 0.007509315 |
| 1200.399978 | 257.709016 | 5.81613E-06 | 0.006981687 |
| 1200.439978 | 257.558198 | 5.81273E-06 | 0.006977833 |
| 1200.479978 | 233.250376 | 5.26414E-06 | 0.00631949  |
| 1200.519978 | 205.548333 | 4.63894E-06 | 0.00556914  |
| 1200.559978 | 201.261703 | 4.5422E-06  | 0.005453179 |
| 1200.599978 | 191.504923 | 4.322E-06   | 0.005188992 |
| 1200.639978 | 209.79946  | 4.73488E-06 | 0.005684888 |

|             |            |             |             |
|-------------|------------|-------------|-------------|
| 1200.679978 | 232.935809 | 5.25704E-06 | 0.006312019 |
| 1200.719978 | 240.217388 | 5.42137E-06 | 0.006509549 |
| 1200.759978 | 276.676532 | 6.2442E-06  | 0.00749779  |
| 1200.799978 | 296.848151 | 6.69945E-06 | 0.008044699 |
| 1200.839978 | 277.792921 | 6.2694E-06  | 0.007528545 |
| 1200.879978 | 237.110701 | 5.35126E-06 | 0.006426219 |
| 1200.919978 | 215.914396 | 4.87289E-06 | 0.005851948 |
| 1200.959978 | 215.04009  | 4.85316E-06 | 0.005828445 |
| 1200.999978 | 237.826982 | 5.36742E-06 | 0.006446276 |
| 1201.039978 | 274.09871  | 6.18603E-06 | 0.007429665 |
| 1201.079978 | 304.836212 | 6.87973E-06 | 0.008263104 |
| 1201.119978 | 327.217597 | 7.38485E-06 | 0.008870085 |
| 1201.159978 | 347.05517  | 7.83255E-06 | 0.009408148 |
| 1201.199978 | 383.226752 | 8.64889E-06 | 0.010389051 |
| 1201.239978 | 431.535125 | 9.73915E-06 | 0.011699052 |
| 1201.279978 | 437.663654 | 9.87746E-06 | 0.011865594 |
| 1201.319978 | 427.553434 | 9.64929E-06 | 0.011591879 |
| 1201.359978 | 391.217677 | 8.82924E-06 | 0.010607093 |
| 1201.399978 | 336.966408 | 7.60486E-06 | 0.009136482 |
| 1201.439978 | 294.980909 | 6.65731E-06 | 0.007998356 |
| 1201.479978 | 269.376969 | 6.07946E-06 | 0.007304353 |
| 1201.519978 | 259.469278 | 5.85586E-06 | 0.007035933 |
| 1201.559978 | 249.677442 | 5.63487E-06 | 0.006770637 |
| 1201.599978 | 240.377745 | 5.42499E-06 | 0.006518669 |
| 1201.639978 | 230.61749  | 5.20472E-06 | 0.006254194 |
| 1201.679978 | 228.842404 | 5.16465E-06 | 0.006206262 |
| 1201.719978 | 222.49097  | 5.02131E-06 | 0.00603421  |
| 1201.759978 | 209.651939 | 4.73155E-06 | 0.00568619  |
| 1201.799978 | 192.997978 | 4.3557E-06  | 0.005234675 |
| 1201.839978 | 188.546432 | 4.25523E-06 | 0.005114106 |
| 1201.879978 | 196.133384 | 4.42646E-06 | 0.00532007  |
| 1201.919978 | 201.176572 | 4.54028E-06 | 0.005457047 |
| 1201.959978 | 203.244058 | 4.58694E-06 | 0.005513313 |
| 1201.999978 | 214.851718 | 4.8489E-06  | 0.005828383 |
| 1202.039978 | 213.766597 | 4.82441E-06 | 0.005799139 |
| 1202.079978 | 221.957635 | 5.00927E-06 | 0.006021549 |
| 1202.119978 | 239.060376 | 5.39526E-06 | 0.006485749 |
| 1202.159978 | 278.959574 | 6.29573E-06 | 0.007568473 |
| 1202.199978 | 349.246073 | 7.882E-06   | 0.009475737 |
| 1202.239978 | 405.529419 | 9.15223E-06 | 0.011003182 |
| 1202.279978 | 415.329053 | 9.3734E-06  | 0.011269449 |
| 1202.319978 | 382.658075 | 8.63606E-06 | 0.010383307 |
| 1202.359978 | 317.155077 | 7.15775E-06 | 0.00860619  |
| 1202.399978 | 277.820012 | 6.27001E-06 | 0.007539061 |
| 1202.439978 | 258.881403 | 5.84259E-06 | 0.007025367 |
| 1202.479978 | 243.230058 | 5.48936E-06 | 0.00660085  |

|             |            |             |             |
|-------------|------------|-------------|-------------|
| 1202.519978 | 242.677165 | 5.47689E-06 | 0.006586064 |
| 1202.559978 | 237.451385 | 5.35895E-06 | 0.006444455 |
| 1202.599978 | 208.107995 | 4.69671E-06 | 0.00564826  |
| 1202.639978 | 194.909827 | 4.39884E-06 | 0.005290225 |
| 1202.679978 | 203.170456 | 4.58527E-06 | 0.005514617 |
| 1202.719978 | 232.073608 | 5.23758E-06 | 0.00629934  |
| 1202.759978 | 254.438455 | 5.74232E-06 | 0.006906635 |
| 1202.799978 | 232.567169 | 5.24872E-06 | 0.006313157 |
| 1202.839978 | 226.501119 | 5.11181E-06 | 0.006148695 |
| 1202.879978 | 233.657096 | 5.27332E-06 | 0.006343165 |
| 1202.919978 | 248.843895 | 5.61606E-06 | 0.006755671 |
| 1202.959978 | 264.087888 | 5.9601E-06  | 0.007169757 |
| 1202.999978 | 285.708394 | 6.44804E-06 | 0.007756993 |
| 1203.039978 | 304.929528 | 6.88183E-06 | 0.008279122 |
| 1203.079978 | 318.819034 | 7.1953E-06  | 0.008656523 |
| 1203.119978 | 343.166787 | 7.7448E-06  | 0.009317919 |
| 1203.159978 | 351.879001 | 7.94142E-06 | 0.009554797 |
| 1203.199978 | 362.859433 | 8.18923E-06 | 0.009853284 |
| 1203.239978 | 388.792613 | 8.77451E-06 | 0.010557838 |
| 1203.279978 | 389.178829 | 8.78322E-06 | 0.010568678 |
| 1203.319978 | 369.636058 | 8.34217E-06 | 0.010038301 |
| 1203.359978 | 357.54723  | 8.06934E-06 | 0.009710324 |
| 1203.399978 | 313.745598 | 7.0808E-06  | 0.008521036 |
| 1203.439978 | 254.570617 | 5.7453E-06  | 0.006914129 |
| 1203.479978 | 217.35862  | 4.90548E-06 | 0.005903649 |
| 1203.519978 | 228.036455 | 5.14647E-06 | 0.006193874 |
| 1203.559978 | 230.944805 | 5.2121E-06  | 0.006273078 |
| 1203.599978 | 218.316585 | 4.9271E-06  | 0.005930259 |
| 1203.639978 | 211.147619 | 4.76531E-06 | 0.005735715 |
| 1203.679978 | 228.471834 | 5.15629E-06 | 0.006206524 |
| 1203.719978 | 248.340405 | 5.6047E-06  | 0.006746486 |
| 1203.759978 | 251.406549 | 5.6739E-06  | 0.006830008 |
| 1203.799978 | 236.279431 | 5.3325E-06  | 0.006419261 |
| 1203.839978 | 239.793702 | 5.41181E-06 | 0.006514953 |
| 1203.879978 | 245.406074 | 5.53847E-06 | 0.006667657 |
| 1203.919978 | 236.443795 | 5.33621E-06 | 0.006424366 |
| 1203.959978 | 224.386439 | 5.06409E-06 | 0.006096961 |
| 1203.999978 | 235.661007 | 5.31854E-06 | 0.006403523 |
| 1204.039978 | 261.872583 | 5.9101E-06  | 0.007115996 |
| 1204.079978 | 285.304438 | 6.43892E-06 | 0.007752979 |
| 1204.119978 | 320.882345 | 7.24187E-06 | 0.008720077 |
| 1204.159978 | 361.549042 | 8.15966E-06 | 0.009825534 |
| 1204.199978 | 360.337339 | 8.13231E-06 | 0.00979293  |
| 1204.239978 | 330.221015 | 7.45263E-06 | 0.008974753 |
| 1204.279978 | 302.402372 | 6.8248E-06  | 0.00821897  |
| 1204.319978 | 292.406964 | 6.59922E-06 | 0.00794757  |

|             |            |             |             |
|-------------|------------|-------------|-------------|
| 1204.359978 | 295.825172 | 6.67636E-06 | 0.008040743 |
| 1204.399978 | 298.932465 | 6.74649E-06 | 0.008125472 |
| 1204.439978 | 277.489434 | 6.26255E-06 | 0.007542866 |
| 1204.479978 | 259.861297 | 5.86471E-06 | 0.007063923 |
| 1204.519978 | 234.786707 | 5.29881E-06 | 0.006382521 |
| 1204.559978 | 223.731266 | 5.0493E-06  | 0.006082188 |
| 1204.599978 | 215.429883 | 4.86195E-06 | 0.005856708 |
| 1204.639978 | 203.196534 | 4.58586E-06 | 0.005524314 |
| 1204.679978 | 211.937541 | 4.78314E-06 | 0.005762147 |
| 1204.719978 | 241.777268 | 5.45658E-06 | 0.006573646 |
| 1204.759978 | 242.517214 | 5.47328E-06 | 0.006593984 |
| 1204.799978 | 237.039377 | 5.34965E-06 | 0.006445256 |
| 1204.839978 | 227.139736 | 5.12623E-06 | 0.006176284 |
| 1204.879978 | 208.902466 | 4.71464E-06 | 0.005680573 |
| 1204.919978 | 198.72854  | 4.48503E-06 | 0.005404098 |
| 1204.959978 | 209.289732 | 4.72338E-06 | 0.005691481 |
| 1204.999978 | 247.925325 | 5.59533E-06 | 0.006742372 |
| 1205.039978 | 258.363087 | 5.8309E-06  | 0.007026462 |
| 1205.079978 | 272.273873 | 6.14484E-06 | 0.007405026 |
| 1205.119978 | 313.699545 | 7.07976E-06 | 0.008531962 |
| 1205.159978 | 377.283851 | 8.51477E-06 | 0.010261661 |
| 1205.199978 | 417.762188 | 9.42831E-06 | 0.011363    |
| 1205.239978 | 445.004755 | 1.00431E-05 | 0.012104391 |
| 1205.279978 | 434.807489 | 9.813E-06   | 0.011827412 |
| 1205.319978 | 409.862131 | 9.25002E-06 | 0.011149231 |
| 1205.359978 | 363.94694  | 8.21378E-06 | 0.009900556 |
| 1205.399978 | 325.808931 | 7.35305E-06 | 0.008863371 |
| 1205.439978 | 312.618039 | 7.05535E-06 | 0.008504805 |
| 1205.479978 | 273.597785 | 6.17472E-06 | 0.007443502 |
| 1205.519978 | 226.051646 | 5.10167E-06 | 0.006150166 |
| 1205.559978 | 198.690831 | 4.48418E-06 | 0.005405942 |
| 1205.599978 | 183.444215 | 4.14008E-06 | 0.004991281 |
| 1205.639978 | 193.585201 | 4.36895E-06 | 0.005267379 |
| 1205.679978 | 224.394739 | 5.06428E-06 | 0.006105897 |
| 1205.719978 | 248.936537 | 5.61815E-06 | 0.006773917 |
| 1205.759978 | 265.869805 | 6.00031E-06 | 0.007234935 |
| 1205.799978 | 262.98206  | 5.93514E-06 | 0.00715659  |
| 1205.839978 | 242.733871 | 5.47817E-06 | 0.006605791 |
| 1205.879978 | 225.158351 | 5.08151E-06 | 0.006127692 |
| 1205.919978 | 221.126564 | 4.99052E-06 | 0.006018166 |
| 1205.959978 | 227.491791 | 5.13417E-06 | 0.006191607 |
| 1205.999978 | 239.771693 | 5.41131E-06 | 0.006526044 |
| 1206.039978 | 256.298364 | 5.7843E-06  | 0.006976094 |
| 1206.079978 | 267.555196 | 6.03835E-06 | 0.007282731 |
| 1206.119978 | 276.701188 | 6.24476E-06 | 0.00753193  |
| 1206.159978 | 308.646403 | 6.96572E-06 | 0.008401772 |

|             |            |             |             |
|-------------|------------|-------------|-------------|
| 1206.199978 | 321.639901 | 7.25896E-06 | 0.008755763 |
| 1206.239978 | 341.707298 | 7.71186E-06 | 0.009302351 |
| 1206.279978 | 344.474422 | 7.77431E-06 | 0.009377992 |
| 1206.319978 | 344.583269 | 7.77676E-06 | 0.009381266 |
| 1206.359978 | 333.237958 | 7.52072E-06 | 0.009072691 |
| 1206.399978 | 298.605125 | 6.7391E-06  | 0.008130052 |
| 1206.439978 | 292.310277 | 6.59704E-06 | 0.007958928 |
| 1206.479978 | 271.96437  | 6.13786E-06 | 0.007405202 |
| 1206.519978 | 249.537116 | 5.63171E-06 | 0.006794765 |
| 1206.559978 | 232.392879 | 5.24478E-06 | 0.006328146 |
| 1206.599978 | 224.885303 | 5.07535E-06 | 0.006123915 |
| 1206.639977 | 221.264722 | 4.99364E-06 | 0.006025522 |
| 1206.679977 | 229.289649 | 5.17475E-06 | 0.006244265 |
| 1206.719977 | 260.345797 | 5.87564E-06 | 0.007090255 |
| 1206.759977 | 272.94995  | 6.1601E-06  | 0.007433762 |
| 1206.799977 | 249.877991 | 5.6394E-06  | 0.006805626 |
| 1206.839977 | 241.552443 | 5.4515E-06  | 0.006579091 |
| 1206.879977 | 235.882962 | 5.32355E-06 | 0.006424886 |
| 1206.919977 | 259.845931 | 5.86436E-06 | 0.007077814 |
| 1206.959977 | 254.189306 | 5.7367E-06  | 0.006923966 |
| 1206.999977 | 250.865698 | 5.66169E-06 | 0.006833659 |
| 1207.039977 | 294.263089 | 6.64111E-06 | 0.008016083 |
| 1207.079977 | 349.598456 | 7.88995E-06 | 0.009523801 |
| 1207.119977 | 367.587799 | 8.29594E-06 | 0.0100142   |
| 1207.159977 | 391.669617 | 8.83944E-06 | 0.010670615 |
| 1207.199977 | 438.572464 | 9.89797E-06 | 0.011948829 |
| 1207.239977 | 457.65133  | 1.03286E-05 | 0.012469042 |
| 1207.279977 | 426.681341 | 9.6296E-06  | 0.011625628 |
| 1207.319977 | 386.690495 | 8.72707E-06 | 0.010536361 |
| 1207.359977 | 358.298352 | 8.08629E-06 | 0.009763069 |
| 1207.399977 | 324.04053  | 7.31314E-06 | 0.008829889 |
| 1207.439977 | 273.96389  | 6.18298E-06 | 0.007465581 |
| 1207.479977 | 224.562104 | 5.06805E-06 | 0.006119574 |
| 1207.519977 | 197.473843 | 4.45671E-06 | 0.005381566 |
| 1207.559977 | 193.381584 | 4.36435E-06 | 0.005270218 |
| 1207.599977 | 207.349376 | 4.67959E-06 | 0.005651069 |
| 1207.639977 | 221.156303 | 4.99119E-06 | 0.00602756  |
| 1207.679977 | 223.773102 | 5.05025E-06 | 0.006099082 |
| 1207.719977 | 239.771846 | 5.41132E-06 | 0.006535355 |
| 1207.759977 | 251.026431 | 5.66532E-06 | 0.006842343 |
| 1207.799977 | 240.615344 | 5.43035E-06 | 0.00655878  |
| 1207.839977 | 236.541255 | 5.33841E-06 | 0.006447941 |
| 1207.879977 | 237.526694 | 5.36065E-06 | 0.006475018 |
| 1207.919977 | 223.101724 | 5.0351E-06  | 0.006081992 |
| 1207.959977 | 228.738734 | 5.16231E-06 | 0.006235869 |
| 1207.999977 | 259.592429 | 5.85864E-06 | 0.007077236 |



|             |            |             |             |
|-------------|------------|-------------|-------------|
| 1208.039977 | 265.658335 | 5.99554E-06 | 0.00724285  |
| 1208.079977 | 257.759371 | 5.81727E-06 | 0.007027727 |
| 1208.119977 | 279.091478 | 6.29871E-06 | 0.007609592 |
| 1208.159977 | 316.089408 | 7.1337E-06  | 0.008618648 |
| 1208.199977 | 342.135122 | 7.72151E-06 | 0.009329132 |
| 1208.239977 | 341.377857 | 7.70442E-06 | 0.009308792 |
| 1208.279977 | 346.774631 | 7.82622E-06 | 0.009456265 |
| 1208.319977 | 354.425033 | 7.99888E-06 | 0.009665206 |
| 1208.359977 | 340.127742 | 7.67621E-06 | 0.009275624 |
| 1208.399977 | 294.42735  | 6.64482E-06 | 0.008029595 |
| 1208.439977 | 259.208178 | 5.84997E-06 | 0.007069335 |
| 1208.479977 | 254.673566 | 5.74763E-06 | 0.006945893 |
| 1208.519977 | 225.221408 | 5.08293E-06 | 0.006142827 |
| 1208.559977 | 216.86815  | 4.89441E-06 | 0.005915191 |
| 1208.599977 | 213.968366 | 4.82897E-06 | 0.005836291 |
| 1208.639977 | 216.346244 | 4.88263E-06 | 0.005901346 |
| 1208.679977 | 242.773663 | 5.47906E-06 | 0.006622434 |
| 1208.719977 | 264.929723 | 5.97909E-06 | 0.007227051 |
| 1208.759977 | 268.745738 | 6.06522E-06 | 0.007331392 |
| 1208.799977 | 259.014724 | 5.8456E-06  | 0.007066163 |
| 1208.839977 | 249.851452 | 5.6388E-06  | 0.006816406 |
| 1208.879977 | 258.791544 | 5.84056E-06 | 0.007060542 |
| 1208.919977 | 253.991874 | 5.73224E-06 | 0.006929823 |
| 1208.959977 | 246.547633 | 5.56424E-06 | 0.006726939 |
| 1208.999977 | 255.233779 | 5.76027E-06 | 0.006964167 |
| 1209.039977 | 286.441881 | 6.46459E-06 | 0.007815953 |
| 1209.079977 | 314.261676 | 7.09245E-06 | 0.008575337 |
| 1209.119977 | 342.396863 | 7.72742E-06 | 0.009343378 |
| 1209.159977 | 398.565219 | 8.99506E-06 | 0.010876469 |
| 1209.199977 | 456.135409 | 1.02943E-05 | 0.012447917 |
| 1209.239977 | 466.697455 | 1.05327E-05 | 0.012736576 |
| 1209.279977 | 454.577819 | 1.02592E-05 | 0.012406231 |
| 1209.319977 | 422.282836 | 9.53034E-06 | 0.011525225 |
| 1209.359977 | 374.5857   | 8.45388E-06 | 0.010223781 |
| 1209.399977 | 326.130185 | 7.3603E-06  | 0.008901552 |
| 1209.439977 | 277.863669 | 6.271E-06   | 0.007584393 |
| 1209.479977 | 258.271324 | 5.82882E-06 | 0.007049846 |
| 1209.519977 | 240.564388 | 5.4292E-06  | 0.00656673  |
| 1209.559977 | 224.381154 | 5.06397E-06 | 0.006125176 |
| 1209.599977 | 223.347682 | 5.04065E-06 | 0.006097165 |
| 1209.639977 | 243.764083 | 5.50142E-06 | 0.006654733 |
| 1209.679977 | 234.747932 | 5.29793E-06 | 0.006408804 |
| 1209.719977 | 233.467812 | 5.26904E-06 | 0.006374067 |
| 1209.759977 | 252.113154 | 5.68984E-06 | 0.006883344 |
| 1209.799977 | 254.736594 | 5.74905E-06 | 0.006955201 |
| 1209.839977 | 231.873435 | 5.23306E-06 | 0.006331166 |

|             |            |             |             |
|-------------|------------|-------------|-------------|
| 1209.879977 | 230.009114 | 5.19099E-06 | 0.006280469 |
| 1209.919977 | 236.466975 | 5.33673E-06 | 0.006457017 |
| 1209.959977 | 231.156078 | 5.21687E-06 | 0.006312205 |
| 1209.999977 | 228.839203 | 5.16458E-06 | 0.006249144 |
| 1210.039977 | 256.060832 | 5.77894E-06 | 0.006992744 |
| 1210.079977 | 287.314866 | 6.4843E-06  | 0.007846517 |
| 1210.119977 | 324.920981 | 7.33301E-06 | 0.008873827 |
| 1210.159977 | 343.234069 | 7.74631E-06 | 0.00937428  |
| 1210.199977 | 367.074391 | 8.28436E-06 | 0.01002573  |
| 1210.239977 | 383.13326  | 8.64678E-06 | 0.010464684 |
| 1210.279977 | 373.407156 | 8.42728E-06 | 0.010199368 |
| 1210.319977 | 376.085021 | 8.48772E-06 | 0.010272851 |
| 1210.359977 | 375.573876 | 8.47618E-06 | 0.010259228 |
| 1210.399977 | 327.79767  | 7.39794E-06 | 0.008954463 |
| 1210.439977 | 272.810086 | 6.15694E-06 | 0.007452611 |
| 1210.479977 | 218.458448 | 4.9303E-06  | 0.005968033 |
| 1210.519977 | 211.019133 | 4.76241E-06 | 0.00576499  |
| 1210.559977 | 229.200241 | 5.17273E-06 | 0.0062619   |
| 1210.599977 | 223.532258 | 5.04481E-06 | 0.006107249 |
| 1210.639977 | 236.996203 | 5.34867E-06 | 0.006475319 |
| 1210.679977 | 255.684626 | 5.77045E-06 | 0.006986163 |
| 1210.719977 | 252.60528  | 5.70095E-06 | 0.006902253 |
| 1210.759977 | 255.153481 | 5.75846E-06 | 0.006972111 |
| 1210.799977 | 271.541954 | 6.12832E-06 | 0.007420174 |
| 1210.839977 | 266.092626 | 6.00534E-06 | 0.007271506 |
| 1210.879977 | 251.623316 | 5.67879E-06 | 0.00687633  |
| 1210.919977 | 250.518475 | 5.65385E-06 | 0.006846364 |
| 1210.959977 | 249.936784 | 5.64073E-06 | 0.006830692 |
| 1210.999977 | 261.308322 | 5.89736E-06 | 0.007141709 |
| 1211.039977 | 267.676088 | 6.04108E-06 | 0.007315985 |
| 1211.079977 | 272.682409 | 6.15406E-06 | 0.007453061 |
| 1211.119977 | 317.584758 | 7.16745E-06 | 0.008680637 |
| 1211.159977 | 379.444856 | 8.56354E-06 | 0.010371819 |
| 1211.199977 | 419.949665 | 9.47768E-06 | 0.011479365 |
| 1211.239977 | 455.857133 | 1.02881E-05 | 0.01246131  |
| 1211.279977 | 442.727181 | 9.99174E-06 | 0.01210279  |
| 1211.319977 | 386.454384 | 8.72174E-06 | 0.010564814 |
| 1211.359977 | 335.95133  | 7.58195E-06 | 0.009184475 |
| 1211.399977 | 299.031067 | 6.74871E-06 | 0.008175393 |
| 1211.439977 | 263.020529 | 5.93601E-06 | 0.007191116 |
| 1211.479977 | 241.042275 | 5.43999E-06 | 0.006590437 |
| 1211.519977 | 224.443565 | 5.06538E-06 | 0.006136807 |
| 1211.559977 | 193.988863 | 4.37806E-06 | 0.00530428  |
| 1211.599977 | 178.299991 | 4.02398E-06 | 0.004875457 |
| 1211.639977 | 192.613089 | 4.34701E-06 | 0.00526701  |
| 1211.679977 | 215.832661 | 4.87104E-06 | 0.005902145 |

|             |            |             |             |
|-------------|------------|-------------|-------------|
| 1211.719977 | 215.623243 | 4.86632E-06 | 0.005896613 |
| 1211.759977 | 219.841559 | 4.96152E-06 | 0.006012169 |
| 1211.799977 | 218.030077 | 4.92064E-06 | 0.005962826 |
| 1211.839977 | 199.789031 | 4.50896E-06 | 0.005464138 |
| 1211.879977 | 185.855637 | 4.1945E-06  | 0.005083234 |
| 1211.919977 | 173.625009 | 3.91847E-06 | 0.004748878 |
| 1211.959977 | 170.950327 | 3.85811E-06 | 0.004675876 |
| 1211.999977 | 179.856259 | 4.05911E-06 | 0.004919635 |
| 1212.039977 | 228.854568 | 5.16493E-06 | 0.0062601   |
| 1212.079977 | 271.084802 | 6.11801E-06 | 0.007415513 |
| 1212.119977 | 311.661607 | 7.03377E-06 | 0.008525771 |
| 1212.159977 | 347.970976 | 7.85322E-06 | 0.009519359 |
| 1212.199977 | 370.642321 | 8.36488E-06 | 0.010139908 |
| 1212.239977 | 397.473395 | 8.97042E-06 | 0.010874303 |
| 1212.279977 | 396.19437  | 8.94156E-06 | 0.010839668 |
| 1212.319977 | 361.008365 | 8.14746E-06 | 0.009877324 |
| 1212.359977 | 320.01384  | 7.22227E-06 | 0.008755987 |
| 1212.399977 | 271.675108 | 6.13133E-06 | 0.007433623 |
| 1212.439977 | 241.792906 | 5.45693E-06 | 0.006616199 |
| 1212.479977 | 243.238373 | 5.48955E-06 | 0.006655971 |
| 1212.519977 | 228.586639 | 5.15888E-06 | 0.006255248 |
| 1212.559977 | 211.204431 | 4.76659E-06 | 0.005779776 |
| 1212.599977 | 214.919337 | 4.85043E-06 | 0.005881631 |
| 1212.639977 | 220.961945 | 4.9868E-06  | 0.006047197 |
| 1212.679977 | 231.578515 | 5.2264E-06  | 0.006337956 |
| 1212.719977 | 259.007366 | 5.84544E-06 | 0.007088876 |
| 1212.759977 | 270.263417 | 6.09947E-06 | 0.007397192 |
| 1212.799977 | 275.285354 | 6.21281E-06 | 0.007534892 |
| 1212.839977 | 258.022988 | 5.82322E-06 | 0.007062633 |
| 1212.879977 | 232.109623 | 5.23839E-06 | 0.006353539 |
| 1212.919977 | 227.714722 | 5.1392E-06  | 0.006233443 |
| 1212.959977 | 239.895382 | 5.4141E-06  | 0.006567092 |
| 1212.999977 | 276.677871 | 6.24423E-06 | 0.007574256 |
| 1213.039977 | 313.064684 | 7.06543E-06 | 0.008570654 |
| 1213.079977 | 352.346319 | 7.95197E-06 | 0.00964637  |
| 1213.119977 | 399.274823 | 9.01108E-06 | 0.010931517 |
| 1213.159977 | 458.941664 | 1.03577E-05 | 0.012565516 |
| 1213.199977 | 505.37962  | 1.14057E-05 | 0.013837412 |
| 1213.239977 | 518.151357 | 1.1694E-05  | 0.014187573 |
| 1213.279977 | 495.08243  | 1.11733E-05 | 0.013556366 |
| 1213.319977 | 436.839766 | 9.85887E-06 | 0.011961958 |
| 1213.359977 | 414.637425 | 9.35779E-06 | 0.011354367 |
| 1213.399977 | 392.280773 | 8.85323E-06 | 0.01074251  |
| 1213.439977 | 339.314414 | 7.65785E-06 | 0.009292346 |
| 1213.479977 | 292.716015 | 6.60619E-06 | 0.008016483 |
| 1213.519977 | 275.000116 | 6.20637E-06 | 0.007531553 |

|             |            |             |             |
|-------------|------------|-------------|-------------|
| 1213.559977 | 247.390721 | 5.58326E-06 | 0.006775626 |
| 1213.599977 | 233.351796 | 5.26643E-06 | 0.006391333 |
| 1213.639977 | 249.055013 | 5.62082E-06 | 0.006821658 |
| 1213.679977 | 255.517369 | 5.76667E-06 | 0.006998893 |
| 1213.719977 | 234.089585 | 5.28308E-06 | 0.006412175 |
| 1213.759977 | 215.392387 | 4.86111E-06 | 0.005900216 |
| 1213.799977 | 216.542537 | 4.88706E-06 | 0.005931917 |
| 1213.839977 | 229.865077 | 5.18773E-06 | 0.00629708  |
| 1213.879977 | 248.008749 | 5.59721E-06 | 0.006794344 |
| 1213.919977 | 249.489598 | 5.63063E-06 | 0.006835138 |
| 1213.959977 | 240.996384 | 5.43895E-06 | 0.006602671 |
| 1213.999977 | 224.205683 | 5.06001E-06 | 0.006142852 |
| 1214.039977 | 243.731174 | 5.50067E-06 | 0.006678037 |
| 1214.079977 | 284.947778 | 6.43087E-06 | 0.007807596 |
| 1214.119977 | 306.335496 | 6.91357E-06 | 0.008393898 |
| 1214.159977 | 349.575711 | 7.88944E-06 | 0.009579038 |
| 1214.199977 | 422.288529 | 9.53046E-06 | 0.011571889 |
| 1214.239977 | 441.465869 | 9.96327E-06 | 0.0120978   |
| 1214.279977 | 411.399218 | 9.28471E-06 | 0.011274234 |
| 1214.319977 | 377.482698 | 8.51926E-06 | 0.010345106 |
| 1214.359977 | 351.26559  | 7.92758E-06 | 0.00962693  |
| 1214.399977 | 311.514296 | 7.03044E-06 | 0.008537771 |
| 1214.439977 | 263.456034 | 5.94584E-06 | 0.007220861 |
| 1214.479977 | 222.523819 | 5.02205E-06 | 0.006099182 |
| 1214.519977 | 222.120268 | 5.01295E-06 | 0.006088322 |
| 1214.559977 | 225.366109 | 5.0862E-06  | 0.006177494 |
| 1214.599977 | 224.550491 | 5.06779E-06 | 0.00615534  |
| 1214.639977 | 218.626418 | 4.93409E-06 | 0.005993147 |
| 1214.679977 | 201.43266  | 4.54605E-06 | 0.005522001 |
| 1214.719977 | 202.80941  | 4.57713E-06 | 0.005559926 |
| 1214.759977 | 212.92589  | 4.80544E-06 | 0.005837457 |
| 1214.799977 | 211.221259 | 4.76697E-06 | 0.005790915 |
| 1214.839977 | 200.7394   | 4.53041E-06 | 0.005503722 |
| 1214.879977 | 198.351045 | 4.47651E-06 | 0.005438418 |
| 1214.919977 | 201.611068 | 4.55008E-06 | 0.005527984 |
| 1214.959977 | 218.340111 | 4.92763E-06 | 0.005986876 |
| 1214.999977 | 232.83903  | 5.25485E-06 | 0.006384646 |
| 1215.039977 | 266.251229 | 6.00892E-06 | 0.007301077 |
| 1215.079977 | 312.294219 | 7.04805E-06 | 0.008563939 |
| 1215.119977 | 348.535125 | 7.86595E-06 | 0.009558076 |
| 1215.159977 | 394.569522 | 8.90488E-06 | 0.010820859 |
| 1215.199977 | 438.387561 | 9.8938E-06  | 0.012022941 |
| 1215.239977 | 448.691085 | 1.01263E-05 | 0.012305924 |
| 1215.279977 | 441.152138 | 9.95619E-06 | 0.012099557 |
| 1215.319977 | 410.869616 | 9.27275E-06 | 0.011269364 |
| 1215.359977 | 363.17237  | 8.19629E-06 | 0.009961448 |

|             |            |             |             |
|-------------|------------|-------------|-------------|
| 1215.399977 | 306.276233 | 6.91223E-06 | 0.008401122 |
| 1215.439977 | 251.790986 | 5.68257E-06 | 0.006906825 |
| 1215.479977 | 219.315002 | 4.94963E-06 | 0.006016181 |
| 1215.519977 | 211.719234 | 4.77821E-06 | 0.005808008 |
| 1215.559977 | 209.795179 | 4.73478E-06 | 0.005755415 |
| 1215.599977 | 220.882368 | 4.98501E-06 | 0.006059775 |
| 1215.639977 | 211.915227 | 4.78263E-06 | 0.005813958 |
| 1215.679977 | 231.005394 | 5.21347E-06 | 0.006337911 |
| 1215.719977 | 242.438966 | 5.47151E-06 | 0.006651824 |
| 1215.759977 | 211.992463 | 4.78437E-06 | 0.005816651 |
| 1215.799977 | 217.782407 | 4.91505E-06 | 0.005975712 |
| 1215.839977 | 231.753928 | 5.23036E-06 | 0.006359285 |
| 1215.879977 | 228.162338 | 5.14931E-06 | 0.006260938 |
| 1215.919977 | 230.555311 | 5.20331E-06 | 0.006326811 |
| 1215.959977 | 224.756211 | 5.07243E-06 | 0.006167877 |
| 1215.999977 | 237.472242 | 5.35942E-06 | 0.006517052 |
| 1216.039977 | 255.585837 | 5.76822E-06 | 0.007014382 |
| 1216.079977 | 278.66565  | 6.2891E-06  | 0.007648043 |
| 1216.119977 | 313.106021 | 7.06637E-06 | 0.00859355  |
| 1216.159977 | 359.930424 | 8.12313E-06 | 0.009879024 |
| 1216.199977 | 390.756537 | 8.81883E-06 | 0.010725462 |
| 1216.239977 | 384.846849 | 8.68546E-06 | 0.0105636   |
| 1216.279977 | 365.592609 | 8.25092E-06 | 0.010035424 |
| 1216.319977 | 376.170428 | 8.48964E-06 | 0.010326122 |
| 1216.359977 | 388.221914 | 8.76163E-06 | 0.010657293 |
| 1216.399977 | 337.015061 | 7.60596E-06 | 0.00925189  |
| 1216.439977 | 272.628485 | 6.15285E-06 | 0.007484567 |
| 1216.479977 | 241.50121  | 5.45035E-06 | 0.006630237 |
| 1216.519977 | 262.035973 | 5.91379E-06 | 0.00719424  |
| 1216.559977 | 263.420201 | 5.94503E-06 | 0.007232482 |
| 1216.599977 | 228.851139 | 5.16485E-06 | 0.006283558 |
| 1216.639977 | 187.885785 | 4.24032E-06 | 0.005158943 |
| 1216.679977 | 200.262503 | 4.51965E-06 | 0.005498962 |
| 1216.719977 | 246.993341 | 5.5743E-06  | 0.006782357 |
| 1216.759977 | 279.778542 | 6.31421E-06 | 0.00768288  |
| 1216.799977 | 279.730223 | 6.31312E-06 | 0.007681806 |
| 1216.839977 | 243.498507 | 5.49542E-06 | 0.006687049 |
| 1216.879977 | 223.533902 | 5.04485E-06 | 0.006138976 |
| 1216.919977 | 231.570067 | 5.22621E-06 | 0.006359884 |
| 1216.959977 | 212.908131 | 4.80504E-06 | 0.005847541 |
| 1216.999977 | 196.438292 | 4.43334E-06 | 0.005395373 |
| 1217.039977 | 228.347263 | 5.15348E-06 | 0.006271991 |
| 1217.079977 | 277.990735 | 6.27386E-06 | 0.007635794 |
| 1217.119977 | 309.183961 | 6.97785E-06 | 0.008492882 |
| 1217.159977 | 346.721095 | 7.82501E-06 | 0.009524292 |
| 1217.199977 | 369.120772 | 8.33054E-06 | 0.010139935 |

|             |            |             |             |
|-------------|------------|-------------|-------------|
| 1217.239977 | 413.543228 | 9.33309E-06 | 0.011360616 |
| 1217.279977 | 450.329872 | 1.01633E-05 | 0.012371603 |
| 1217.319977 | 425.103932 | 9.594E-06   | 0.011678972 |
| 1217.359977 | 370.285547 | 8.35683E-06 | 0.010173269 |
| 1217.399977 | 317.33547  | 7.16182E-06 | 0.008718799 |
| 1217.439977 | 282.764672 | 6.3816E-06  | 0.007769221 |
| 1217.479977 | 250.720814 | 5.65842E-06 | 0.006889012 |
| 1217.519977 | 214.370775 | 4.83805E-06 | 0.005890422 |
| 1217.559977 | 184.06108  | 4.154E-06   | 0.005057747 |
| 1217.599977 | 184.503626 | 4.16399E-06 | 0.005070074 |
| 1217.639977 | 217.439833 | 4.90731E-06 | 0.005975342 |
| 1217.679977 | 227.84671  | 5.14218E-06 | 0.006261533 |
| 1217.719977 | 211.624553 | 4.77607E-06 | 0.005815918 |
| 1217.759977 | 212.906984 | 4.80501E-06 | 0.005851354 |
| 1217.799977 | 205.882228 | 4.64648E-06 | 0.005658477 |
| 1217.839977 | 201.971209 | 4.55821E-06 | 0.005551169 |
| 1217.879977 | 208.947384 | 4.71565E-06 | 0.005743097 |
| 1217.919977 | 223.956505 | 5.05439E-06 | 0.006155838 |
| 1217.959977 | 213.219246 | 4.81206E-06 | 0.005860898 |
| 1217.999977 | 195.03649  | 4.4017E-06  | 0.005361273 |
| 1218.039977 | 191.908851 | 4.33112E-06 | 0.005275472 |
| 1218.079977 | 225.799266 | 5.09597E-06 | 0.006207305 |
| 1218.119977 | 263.009814 | 5.93577E-06 | 0.007230474 |
| 1218.159977 | 291.921171 | 6.58825E-06 | 0.008025548 |
| 1218.199977 | 328.419044 | 7.41196E-06 | 0.00902925  |
| 1218.239977 | 372.484636 | 8.40646E-06 | 0.010241085 |
| 1218.279977 | 383.087828 | 8.64576E-06 | 0.010532955 |
| 1218.319977 | 366.105835 | 8.2625E-06  | 0.010066367 |
| 1218.359977 | 318.811723 | 7.19514E-06 | 0.008766266 |
| 1218.399977 | 272.274737 | 6.14486E-06 | 0.007486899 |
| 1218.439977 | 246.317416 | 5.55904E-06 | 0.006773358 |
| 1218.479977 | 220.958669 | 4.98673E-06 | 0.00607623  |
| 1218.519977 | 201.70571  | 4.55222E-06 | 0.005546967 |
| 1218.559977 | 178.325554 | 4.02456E-06 | 0.004904167 |
| 1218.599977 | 168.229936 | 3.79672E-06 | 0.004626677 |
| 1218.639977 | 173.554786 | 3.91689E-06 | 0.004773278 |
| 1218.679977 | 197.967509 | 4.46785E-06 | 0.00544488  |
| 1218.719977 | 215.817193 | 4.87069E-06 | 0.005936011 |
| 1218.759977 | 235.711042 | 5.31967E-06 | 0.006483401 |
| 1218.799977 | 241.365688 | 5.44729E-06 | 0.006639154 |
| 1218.839977 | 225.551228 | 5.09038E-06 | 0.006204355 |
| 1218.879977 | 219.592162 | 4.95589E-06 | 0.006040634 |
| 1218.919977 | 221.034381 | 4.98844E-06 | 0.006080507 |
| 1218.959977 | 234.220633 | 5.28603E-06 | 0.006443463 |
| 1218.999977 | 243.322615 | 5.49145E-06 | 0.00669408  |
| 1219.039977 | 277.468903 | 6.26209E-06 | 0.007633734 |

|             |            |             |             |
|-------------|------------|-------------|-------------|
| 1219.079977 | 316.617091 | 7.14561E-06 | 0.008711066 |
| 1219.119977 | 351.603863 | 7.93521E-06 | 0.009673972 |
| 1219.159977 | 380.043384 | 8.57705E-06 | 0.010456796 |
| 1219.199977 | 384.665107 | 8.68136E-06 | 0.010584309 |
| 1219.239977 | 403.756743 | 9.11223E-06 | 0.011109992 |
| 1219.279977 | 431.491936 | 9.73817E-06 | 0.011873558 |
| 1219.319977 | 395.546167 | 8.92693E-06 | 0.010884779 |
| 1219.359977 | 367.907411 | 8.30316E-06 | 0.010124538 |
| 1219.399977 | 341.208037 | 7.70059E-06 | 0.009390099 |
| 1219.439977 | 295.134489 | 6.66077E-06 | 0.008122414 |
| 1219.479977 | 247.880457 | 5.59432E-06 | 0.006822157 |
| 1219.519977 | 221.335409 | 4.99523E-06 | 0.006091785 |
| 1219.559977 | 199.452448 | 4.50136E-06 | 0.005489683 |
| 1219.599977 | 193.584196 | 4.36893E-06 | 0.005328342 |
| 1219.639977 | 186.853124 | 4.21701E-06 | 0.00514324  |
| 1219.679977 | 203.260041 | 4.5873E-06  | 0.005595033 |
| 1219.719977 | 210.439235 | 4.74932E-06 | 0.005792841 |
| 1219.759977 | 217.208127 | 4.90208E-06 | 0.005979367 |
| 1219.799977 | 225.632084 | 5.0922E-06  | 0.006211468 |
| 1219.839977 | 225.502248 | 5.08927E-06 | 0.006208097 |
| 1219.879977 | 234.72102  | 5.29733E-06 | 0.006462103 |
| 1219.919977 | 246.607798 | 5.56559E-06 | 0.00678958  |
| 1219.959977 | 247.762984 | 5.59167E-06 | 0.006821608 |
| 1219.999977 | 242.325643 | 5.46895E-06 | 0.006672122 |
| 1220.039977 | 253.051498 | 5.71102E-06 | 0.006967673 |
| 1220.079977 | 260.598803 | 5.88135E-06 | 0.00717572  |
| 1220.119977 | 284.10871  | 6.41194E-06 | 0.007823333 |
| 1220.159977 | 323.255936 | 7.29544E-06 | 0.008901599 |
| 1220.199977 | 353.591253 | 7.98006E-06 | 0.009737272 |
| 1220.239977 | 366.077661 | 8.26186E-06 | 0.010081455 |
| 1220.279977 | 345.650887 | 7.80086E-06 | 0.009519232 |
| 1220.319977 | 310.582483 | 7.00941E-06 | 0.008553728 |
| 1220.359977 | 294.306537 | 6.64209E-06 | 0.008105739 |
| 1220.399977 | 282.603195 | 6.37796E-06 | 0.007783663 |
| 1220.439977 | 264.514781 | 5.96973E-06 | 0.007285697 |
| 1220.479977 | 232.843716 | 5.25496E-06 | 0.006413571 |
| 1220.519977 | 233.482192 | 5.26937E-06 | 0.006431369 |
| 1220.559977 | 231.774051 | 5.23082E-06 | 0.006384526 |
| 1220.599977 | 214.956385 | 4.85127E-06 | 0.005921455 |
| 1220.639977 | 200.039633 | 4.51462E-06 | 0.005510721 |
| 1220.679977 | 201.605918 | 4.54996E-06 | 0.005554051 |
| 1220.719977 | 215.180704 | 4.85633E-06 | 0.005928218 |
| 1220.759977 | 212.538467 | 4.7967E-06  | 0.005855616 |
| 1220.799977 | 234.166567 | 5.28481E-06 | 0.0064517   |
| 1220.839977 | 250.723078 | 5.65847E-06 | 0.006908087 |
| 1220.879977 | 240.053352 | 5.41767E-06 | 0.006614325 |

|             |            |             |             |
|-------------|------------|-------------|-------------|
| 1220.919977 | 232.972258 | 5.25786E-06 | 0.006419426 |
| 1220.959977 | 240.95773  | 5.43808E-06 | 0.006639678 |
| 1220.999977 | 228.71262  | 5.16173E-06 | 0.006302466 |
| 1221.039977 | 253.76133  | 5.72704E-06 | 0.006992944 |
| 1221.079977 | 311.105086 | 7.02121E-06 | 0.008573457 |
| 1221.119977 | 340.163795 | 7.67702E-06 | 0.009374566 |
| 1221.159977 | 372.566009 | 8.4083E-06  | 0.010267874 |
| 1221.199977 | 410.80414  | 9.27128E-06 | 0.011322084 |
| 1221.239977 | 420.394786 | 9.48772E-06 | 0.011586789 |
| 1221.279977 | 432.921004 | 9.77042E-06 | 0.011932423 |
| 1221.319977 | 427.493602 | 9.64794E-06 | 0.011783216 |
| 1221.359977 | 371.982201 | 8.39512E-06 | 0.010253464 |
| 1221.399977 | 306.299179 | 6.91275E-06 | 0.008443228 |
| 1221.439977 | 257.395994 | 5.80907E-06 | 0.007095429 |
| 1221.479977 | 220.295527 | 4.97176E-06 | 0.006072909 |
| 1221.519977 | 204.185259 | 4.60818E-06 | 0.00562898  |
| 1221.559977 | 195.60473  | 4.41453E-06 | 0.005392609 |
| 1221.599977 | 194.020385 | 4.37877E-06 | 0.005349105 |
| 1221.639977 | 195.891621 | 4.421E-06   | 0.005400872 |
| 1221.679977 | 204.905367 | 4.62443E-06 | 0.005649572 |
| 1221.719977 | 210.316292 | 4.74655E-06 | 0.00579895  |
| 1221.759977 | 217.003123 | 4.89746E-06 | 0.005983518 |
| 1221.799977 | 220.502802 | 4.97644E-06 | 0.006080216 |
| 1221.839977 | 210.258197 | 4.74523E-06 | 0.005797917 |
| 1221.879977 | 203.733743 | 4.59799E-06 | 0.005618188 |
| 1221.919977 | 199.163979 | 4.49485E-06 | 0.005492351 |
| 1221.959977 | 190.649866 | 4.3027E-06  | 0.00525773  |
| 1221.999977 | 210.200057 | 4.74392E-06 | 0.005797073 |
| 1222.039977 | 224.963621 | 5.07712E-06 | 0.006204438 |
| 1222.079977 | 250.685886 | 5.65763E-06 | 0.006914078 |
| 1222.119977 | 285.959999 | 6.45372E-06 | 0.007887219 |
| 1222.159977 | 299.073157 | 6.74966E-06 | 0.00824917  |
| 1222.199977 | 324.533621 | 7.32427E-06 | 0.008951725 |
| 1222.239977 | 372.409747 | 8.40477E-06 | 0.010272645 |
| 1222.279977 | 396.399329 | 8.94618E-06 | 0.010934738 |
| 1222.319977 | 363.644237 | 8.20694E-06 | 0.010031511 |
| 1222.359977 | 321.731983 | 7.26104E-06 | 0.008875608 |
| 1222.399977 | 304.899922 | 6.88117E-06 | 0.008411538 |
| 1222.439977 | 282.453206 | 6.37458E-06 | 0.007792536 |
| 1222.479977 | 264.19402  | 5.96249E-06 | 0.007289026 |
| 1222.519977 | 242.735116 | 5.47819E-06 | 0.006697201 |
| 1222.559977 | 209.420803 | 4.72634E-06 | 0.005778229 |
| 1222.599977 | 208.679904 | 4.70961E-06 | 0.005757975 |
| 1222.639977 | 209.559397 | 4.72946E-06 | 0.005782431 |
| 1222.679977 | 212.620517 | 4.79855E-06 | 0.00586709  |
| 1222.719977 | 229.018828 | 5.16864E-06 | 0.006319794 |



|             |            |             |             |
|-------------|------------|-------------|-------------|
| 1222.759977 | 236.650909 | 5.34088E-06 | 0.006530616 |
| 1222.799977 | 220.202846 | 4.96967E-06 | 0.006076914 |
| 1222.839977 | 205.610034 | 4.64033E-06 | 0.005674384 |
| 1222.879977 | 217.185869 | 4.90158E-06 | 0.005994047 |
| 1222.919977 | 237.231029 | 5.35397E-06 | 0.006547482 |
| 1222.959977 | 247.502462 | 5.58579E-06 | 0.006831193 |
| 1222.999977 | 265.676104 | 5.99594E-06 | 0.007333034 |
| 1223.039977 | 300.275485 | 6.7768E-06  | 0.008288297 |
| 1223.079977 | 337.410849 | 7.61489E-06 | 0.009313623 |
| 1223.119977 | 356.968547 | 8.05628E-06 | 0.009853801 |
| 1223.159977 | 379.887086 | 8.57352E-06 | 0.010486789 |
| 1223.199977 | 388.772175 | 8.77405E-06 | 0.010732413 |
| 1223.239977 | 413.270939 | 9.32695E-06 | 0.011409097 |
| 1223.279977 | 450.779658 | 1.01735E-05 | 0.012445001 |
| 1223.319977 | 408.018534 | 9.20841E-06 | 0.011264832 |
| 1223.359977 | 351.541059 | 7.93379E-06 | 0.009705884 |
| 1223.399977 | 301.87485  | 6.81289E-06 | 0.008334895 |
| 1223.439977 | 258.090784 | 5.82475E-06 | 0.007126231 |
| 1223.479977 | 231.940031 | 5.23456E-06 | 0.006404384 |
| 1223.519977 | 220.578735 | 4.97815E-06 | 0.006090872 |
| 1223.559977 | 209.9697   | 4.73872E-06 | 0.005798113 |
| 1223.599977 | 205.891322 | 4.64668E-06 | 0.005685678 |
| 1223.639977 | 209.032509 | 4.71757E-06 | 0.00577261  |
| 1223.679977 | 218.266188 | 4.92596E-06 | 0.006027803 |
| 1223.719977 | 215.495608 | 4.86344E-06 | 0.005951483 |
| 1223.759977 | 222.890365 | 5.03033E-06 | 0.006155911 |
| 1223.799977 | 240.611045 | 5.43026E-06 | 0.006645547 |
| 1223.839977 | 261.752697 | 5.90739E-06 | 0.007229705 |
| 1223.879977 | 249.795705 | 5.63754E-06 | 0.006899674 |
| 1223.919977 | 241.287305 | 5.44552E-06 | 0.006664879 |
| 1223.959977 | 227.307285 | 5.13001E-06 | 0.006278925 |
| 1223.999977 | 212.211534 | 4.78932E-06 | 0.005862126 |
| 1224.039977 | 227.826983 | 5.14174E-06 | 0.006293692 |
| 1224.079977 | 270.793476 | 6.11143E-06 | 0.007480881 |
| 1224.119977 | 290.266607 | 6.55091E-06 | 0.008019103 |
| 1224.159977 | 302.520178 | 6.82746E-06 | 0.008357902 |
| 1224.199977 | 323.763092 | 7.30688E-06 | 0.008945085 |
| 1224.239977 | 326.551498 | 7.36981E-06 | 0.009022419 |
| 1224.279977 | 317.026526 | 7.15485E-06 | 0.008759536 |
| 1224.319977 | 313.648305 | 7.07861E-06 | 0.008666478 |
| 1224.359977 | 296.101501 | 6.6826E-06  | 0.008181906 |
| 1224.399977 | 266.769731 | 6.02062E-06 | 0.007371649 |
| 1224.439977 | 259.152068 | 5.8487E-06  | 0.007161384 |
| 1224.479977 | 242.834291 | 5.48043E-06 | 0.006710679 |
| 1224.519977 | 214.447252 | 4.83978E-06 | 0.005926402 |
| 1224.559977 | 209.837027 | 4.73573E-06 | 0.005799185 |

|             |            |             |             |
|-------------|------------|-------------|-------------|
| 1224.599977 | 210.591787 | 4.75276E-06 | 0.005820234 |
| 1224.639977 | 231.036375 | 5.21417E-06 | 0.00638548  |
| 1224.679977 | 259.977224 | 5.86732E-06 | 0.007185594 |
| 1224.719977 | 250.557508 | 5.65473E-06 | 0.006925466 |
| 1224.759977 | 256.028964 | 5.77822E-06 | 0.007076929 |
| 1224.799977 | 272.707415 | 6.15463E-06 | 0.007538186 |
| 1224.839977 | 272.550156 | 6.15108E-06 | 0.007534085 |
| 1224.879977 | 260.859506 | 5.88724E-06 | 0.007211157 |
| 1224.919977 | 246.847404 | 5.571E-06   | 0.006824032 |
| 1224.959977 | 239.353475 | 5.40187E-06 | 0.00661708  |
| 1224.999977 | 240.997272 | 5.43897E-06 | 0.006662741 |
| 1225.039977 | 261.928614 | 5.91136E-06 | 0.007241657 |
| 1225.079977 | 311.987511 | 7.04112E-06 | 0.008625939 |
| 1225.119977 | 355.382475 | 8.02049E-06 | 0.009826059 |
| 1225.159977 | 383.412627 | 8.65309E-06 | 0.010601418 |
| 1225.199977 | 406.030497 | 9.16354E-06 | 0.011227172 |
| 1225.239977 | 453.223585 | 1.02286E-05 | 0.01253252  |
| 1225.279977 | 501.729124 | 1.13233E-05 | 0.013874246 |
| 1225.319977 | 512.86652  | 1.15747E-05 | 0.01418269  |
| 1225.359977 | 466.985077 | 1.05392E-05 | 0.012914317 |
| 1225.399977 | 390.139093 | 8.8049E-06  | 0.010789519 |
| 1225.439977 | 293.45253  | 6.62281E-06 | 0.008115862 |
| 1225.479977 | 230.860397 | 5.2102E-06  | 0.006384993 |
| 1225.519977 | 218.305356 | 4.92685E-06 | 0.00603795  |
| 1225.559977 | 223.621574 | 5.04683E-06 | 0.00618519  |
| 1225.599977 | 220.160408 | 4.96871E-06 | 0.006089655 |
| 1225.639977 | 213.384807 | 4.8158E-06  | 0.005902434 |
| 1225.679977 | 231.009147 | 5.21355E-06 | 0.00639015  |
| 1225.719977 | 255.613137 | 5.76883E-06 | 0.007070973 |
| 1225.759977 | 314.224511 | 7.09161E-06 | 0.008692611 |
| 1225.799977 | 371.95555  | 8.39452E-06 | 0.010290001 |
| 1225.839977 | 400.768224 | 9.04478E-06 | 0.011087454 |
| 1225.879977 | 392.678917 | 8.86222E-06 | 0.010864013 |
| 1225.919977 | 363.941861 | 8.21366E-06 | 0.010069291 |
| 1225.959977 | 299.236253 | 6.75335E-06 | 0.008279331 |
| 1225.999977 | 251.577384 | 5.67775E-06 | 0.006960923 |
| 1226.039977 | 240.446727 | 5.42655E-06 | 0.006653164 |
| 1226.079977 | 238.120948 | 5.37406E-06 | 0.006589025 |
| 1226.119977 | 258.841851 | 5.8417E-06  | 0.007162625 |
| 1226.159977 | 300.645278 | 6.78515E-06 | 0.008319673 |
| 1226.199977 | 344.459836 | 7.77398E-06 | 0.009532453 |
| 1226.239977 | 406.152878 | 9.1663E-06  | 0.011240089 |
| 1226.279977 | 440.591949 | 9.94355E-06 | 0.012193572 |
| 1226.319977 | 430.65604  | 9.71931E-06 | 0.01191898  |
| 1226.359977 | 434.93428  | 9.81586E-06 | 0.012037779 |
| 1226.399977 | 394.627278 | 8.90619E-06 | 0.010922549 |

|             |            |             |             |
|-------------|------------|-------------|-------------|
| 1226.439977 | 308.841747 | 6.97013E-06 | 0.008548444 |
| 1226.479977 | 257.34825  | 5.80799E-06 | 0.007123385 |
| 1226.519977 | 230.35014  | 5.19868E-06 | 0.006376287 |
| 1226.559977 | 203.246318 | 4.58699E-06 | 0.005626214 |
| 1226.599977 | 183.375231 | 4.13852E-06 | 0.005076313 |
| 1226.639977 | 193.604312 | 4.36938E-06 | 0.005359656 |
| 1226.679977 | 235.811843 | 5.32194E-06 | 0.006528323 |
| 1226.719977 | 277.790521 | 6.26935E-06 | 0.007690731 |
| 1226.759977 | 303.10757  | 6.84072E-06 | 0.008391916 |
| 1226.799977 | 316.238199 | 7.13706E-06 | 0.00875574  |
| 1226.839977 | 299.836663 | 6.7669E-06  | 0.008301898 |
| 1226.879977 | 261.679713 | 5.90575E-06 | 0.007245642 |
| 1226.919977 | 263.220132 | 5.94051E-06 | 0.007288533 |
| 1226.959977 | 257.392823 | 5.809E-06   | 0.007127407 |
| 1226.999977 | 249.838608 | 5.63851E-06 | 0.006918451 |
| 1227.039977 | 288.010772 | 6.5E-06     | 0.007975762 |
| 1227.079977 | 297.134661 | 6.70592E-06 | 0.008228695 |
| 1227.119977 | 287.308804 | 6.48416E-06 | 0.007956842 |
| 1227.159977 | 306.436678 | 6.91585E-06 | 0.008486853 |
| 1227.199977 | 342.301439 | 7.72527E-06 | 0.009480447 |
| 1227.239977 | 378.762749 | 8.54815E-06 | 0.010490629 |
| 1227.279977 | 402.492884 | 9.0837E-06  | 0.011148248 |
| 1227.319977 | 370.44701  | 8.36047E-06 | 0.010260976 |
| 1227.359977 | 305.763858 | 6.90066E-06 | 0.008469599 |
| 1227.399977 | 281.124844 | 6.3446E-06  | 0.007787357 |
| 1227.439977 | 263.519302 | 5.94726E-06 | 0.007299909 |
| 1227.479977 | 242.880477 | 5.48147E-06 | 0.0067284   |
| 1227.519977 | 223.05008  | 5.03393E-06 | 0.006179249 |
| 1227.559977 | 213.100079 | 4.80937E-06 | 0.005903793 |
| 1227.599977 | 212.949293 | 4.80597E-06 | 0.005899807 |
| 1227.639977 | 224.117436 | 5.05802E-06 | 0.006209426 |
| 1227.679977 | 222.29352  | 5.01686E-06 | 0.006159093 |
| 1227.719977 | 219.43309  | 4.9523E-06  | 0.006080037 |
| 1227.759977 | 223.875043 | 5.05255E-06 | 0.006203316 |
| 1227.799977 | 225.024365 | 5.07849E-06 | 0.006235366 |
| 1227.839977 | 226.586998 | 5.11375E-06 | 0.00627887  |
| 1227.879977 | 220.214011 | 4.96992E-06 | 0.00610247  |
| 1227.919977 | 206.195915 | 4.65355E-06 | 0.005714193 |
| 1227.959977 | 237.450018 | 5.35892E-06 | 0.006580535 |
| 1227.999977 | 252.731406 | 5.7038E-06  | 0.007004261 |
| 1228.039977 | 252.905634 | 5.70773E-06 | 0.007009318 |
| 1228.079977 | 266.276216 | 6.00948E-06 | 0.007380126 |
| 1228.119977 | 270.973222 | 6.11549E-06 | 0.007510553 |
| 1228.159977 | 273.826119 | 6.17987E-06 | 0.007589874 |
| 1228.199977 | 237.089611 | 5.35078E-06 | 0.006571831 |
| 1228.239977 | 245.678573 | 5.54462E-06 | 0.006810128 |

|             |            |             |             |
|-------------|------------|-------------|-------------|
| 1228.279977 | 300.669617 | 6.78569E-06 | 0.008334733 |
| 1228.319977 | 327.746641 | 7.39679E-06 | 0.009085619 |
| 1228.359977 | 336.548277 | 7.59543E-06 | 0.009329917 |
| 1228.399977 | 322.46787  | 7.27765E-06 | 0.008939866 |
| 1228.439977 | 284.794591 | 6.42742E-06 | 0.007895696 |
| 1228.479977 | 258.56108  | 5.83536E-06 | 0.007168627 |
| 1228.519977 | 225.738082 | 5.09459E-06 | 0.006258811 |
| 1228.559977 | 210.551909 | 4.75186E-06 | 0.005837949 |
| 1228.599977 | 220.836109 | 4.98396E-06 | 0.006123297 |
| 1228.639977 | 268.756849 | 6.06547E-06 | 0.007452276 |
| 1228.679977 | 299.969836 | 6.7699E-06  | 0.008318042 |
| 1228.719977 | 307.303377 | 6.93541E-06 | 0.008521676 |
| 1228.759977 | 285.219475 | 6.43701E-06 | 0.007909536 |
| 1228.799977 | 262.399139 | 5.92198E-06 | 0.007276933 |
| 1228.839977 | 258.166816 | 5.82647E-06 | 0.007159794 |
| 1228.879977 | 250.853018 | 5.6614E-06  | 0.006957185 |
| 1228.919977 | 246.721792 | 5.56817E-06 | 0.006842832 |
| 1228.959977 | 249.170383 | 5.62343E-06 | 0.006910969 |
| 1228.999977 | 245.002452 | 5.52936E-06 | 0.006795588 |
| 1229.039977 | 246.509418 | 5.56337E-06 | 0.006837609 |
| 1229.079977 | 286.031393 | 6.45533E-06 | 0.007934117 |
| 1229.119977 | 330.148185 | 7.45098E-06 | 0.009158154 |
| 1229.159977 | 361.404489 | 8.1564E-06  | 0.010025515 |
| 1229.199977 | 410.744077 | 9.26992E-06 | 0.011394588 |
| 1229.239977 | 411.890503 | 9.29579E-06 | 0.011426763 |
| 1229.279977 | 381.444637 | 8.60867E-06 | 0.010582471 |
| 1229.319977 | 348.665483 | 7.86889E-06 | 0.009673389 |
| 1229.359977 | 305.587482 | 6.89668E-06 | 0.008478507 |
| 1229.399977 | 279.043143 | 6.29762E-06 | 0.007742288 |
| 1229.439977 | 268.810972 | 6.06669E-06 | 0.00745863  |
| 1229.479977 | 258.928917 | 5.84366E-06 | 0.007184669 |
| 1229.519977 | 221.267621 | 4.9937E-06  | 0.006139856 |
| 1229.559977 | 172.37938  | 3.89036E-06 | 0.004783434 |
| 1229.599977 | 176.040091 | 3.97298E-06 | 0.004885176 |
| 1229.639977 | 198.29474  | 4.47524E-06 | 0.005502929 |
| 1229.679977 | 218.867754 | 4.93954E-06 | 0.006074054 |
| 1229.719977 | 213.782304 | 4.82477E-06 | 0.005933115 |
| 1229.759977 | 206.398404 | 4.65812E-06 | 0.005728375 |
| 1229.799977 | 223.748852 | 5.0497E-06  | 0.006210121 |
| 1229.839977 | 226.624582 | 5.1146E-06  | 0.006290141 |
| 1229.879977 | 208.895425 | 4.71448E-06 | 0.005798243 |
| 1229.919977 | 202.183183 | 4.56299E-06 | 0.005612116 |
| 1229.959977 | 196.37005  | 4.4318E-06  | 0.005450935 |
| 1229.999977 | 196.452181 | 4.43365E-06 | 0.005453392 |
| 1230.039977 | 214.770269 | 4.84707E-06 | 0.005962085 |
| 1230.079977 | 232.696978 | 5.25165E-06 | 0.006459945 |

|             |            |             |             |
|-------------|------------|-------------|-------------|
| 1230.119977 | 270.086104 | 6.09547E-06 | 0.007498156 |
| 1230.159977 | 299.473611 | 6.7587E-06  | 0.008314285 |
| 1230.199977 | 329.185276 | 7.42925E-06 | 0.009139467 |
| 1230.239977 | 365.093504 | 8.23965E-06 | 0.010136749 |
| 1230.279977 | 368.405554 | 8.3144E-06  | 0.01022904  |
| 1230.319977 | 321.133113 | 7.24753E-06 | 0.008916777 |
| 1230.359977 | 321.231211 | 7.24974E-06 | 0.008919791 |
| 1230.399977 | 339.749637 | 7.66768E-06 | 0.009434308 |
| 1230.439977 | 314.506292 | 7.09797E-06 | 0.008733625 |
| 1230.479977 | 249.563547 | 5.6323E-06  | 0.006930434 |
| 1230.519977 | 185.946    | 4.19654E-06 | 0.005163929 |
| 1230.559977 | 160.825742 | 3.62961E-06 | 0.004466456 |
| 1230.599977 | 164.208046 | 3.70595E-06 | 0.004560538 |
| 1230.639977 | 184.128642 | 4.15553E-06 | 0.005113958 |
| 1230.679977 | 223.232853 | 5.03805E-06 | 0.006200233 |
| 1230.719977 | 241.350516 | 5.44694E-06 | 0.006703664 |
| 1230.759977 | 241.509173 | 5.45053E-06 | 0.006708289 |
| 1230.799977 | 250.805026 | 5.66032E-06 | 0.006966722 |
| 1230.839977 | 267.1582   | 6.02939E-06 | 0.007421212 |
| 1230.879977 | 274.456295 | 6.1941E-06  | 0.007624189 |
| 1230.919977 | 272.191459 | 6.14298E-06 | 0.007561519 |
| 1230.959977 | 258.744482 | 5.8395E-06  | 0.007188194 |
| 1230.999977 | 247.232363 | 5.57969E-06 | 0.006868598 |
| 1231.039977 | 258.940602 | 5.84393E-06 | 0.00719411  |
| 1231.079977 | 278.402453 | 6.28316E-06 | 0.007735067 |
| 1231.119977 | 309.203652 | 6.9783E-06  | 0.008591119 |
| 1231.159977 | 343.854603 | 7.76032E-06 | 0.009554195 |
| 1231.199977 | 351.626578 | 7.93572E-06 | 0.009770461 |
| 1231.239977 | 339.246844 | 7.65633E-06 | 0.009426778 |
| 1231.279977 | 347.724717 | 7.84766E-06 | 0.00966267  |
| 1231.319977 | 339.256702 | 7.65655E-06 | 0.009427664 |
| 1231.359977 | 291.196986 | 6.57191E-06 | 0.008092387 |
| 1231.399977 | 248.021538 | 5.5975E-06  | 0.006892762 |
| 1231.439977 | 233.323265 | 5.26578E-06 | 0.006484493 |
| 1231.479977 | 225.582818 | 5.09109E-06 | 0.006269575 |
| 1231.519977 | 210.862096 | 4.75886E-06 | 0.005860636 |
| 1231.559977 | 189.046265 | 4.26651E-06 | 0.005254464 |
| 1231.599977 | 192.581632 | 4.3463E-06  | 0.005352902 |
| 1231.639977 | 203.715526 | 4.59758E-06 | 0.005662558 |
| 1231.679977 | 210.671054 | 4.75455E-06 | 0.005856087 |
| 1231.719977 | 202.455274 | 4.56913E-06 | 0.005627893 |
| 1231.759977 | 193.805732 | 4.37393E-06 | 0.005387626 |
| 1231.799977 | 216.099807 | 4.87707E-06 | 0.006007577 |
| 1231.839977 | 243.371381 | 5.49255E-06 | 0.006765946 |
| 1231.879977 | 235.770416 | 5.32101E-06 | 0.006554846 |
| 1231.919977 | 225.751045 | 5.09489E-06 | 0.006276493 |

|             |            |             |             |
|-------------|------------|-------------|-------------|
| 1231.959977 | 229.769067 | 5.18557E-06 | 0.006388412 |
| 1231.999977 | 246.138026 | 5.55499E-06 | 0.006843751 |
| 1232.039977 | 236.656767 | 5.34101E-06 | 0.006580342 |
| 1232.079977 | 227.563459 | 5.13579E-06 | 0.006327704 |
| 1232.119977 | 245.598807 | 5.54282E-06 | 0.006829423 |
| 1232.159977 | 265.982184 | 6.00285E-06 | 0.007396468 |
| 1232.199977 | 288.552069 | 6.51222E-06 | 0.008024355 |
| 1232.239977 | 299.418492 | 6.75746E-06 | 0.00832681  |
| 1232.279977 | 289.000315 | 6.52233E-06 | 0.008037342 |
| 1232.319977 | 293.924914 | 6.63348E-06 | 0.008174565 |
| 1232.359977 | 297.421162 | 6.71238E-06 | 0.00827207  |
| 1232.399977 | 279.880309 | 6.31651E-06 | 0.007784465 |
| 1232.439977 | 263.874471 | 5.95528E-06 | 0.007339524 |
| 1232.479977 | 227.120448 | 5.12579E-06 | 0.006317436 |
| 1232.519977 | 200.786626 | 4.53147E-06 | 0.005585133 |
| 1232.559977 | 202.596386 | 4.57232E-06 | 0.005635656 |
| 1232.599977 | 203.188504 | 4.58568E-06 | 0.005652311 |
| 1232.639977 | 213.69896  | 4.82289E-06 | 0.005944884 |
| 1232.679977 | 229.162136 | 5.17187E-06 | 0.006375261 |
| 1232.719977 | 238.555561 | 5.38387E-06 | 0.0066368   |
| 1232.759977 | 239.896054 | 5.41412E-06 | 0.00667431  |
| 1232.799977 | 245.293288 | 5.53593E-06 | 0.006824692 |
| 1232.839977 | 239.976658 | 5.41594E-06 | 0.006676986 |
| 1232.879977 | 232.748798 | 5.25282E-06 | 0.006476092 |
| 1232.919977 | 237.088062 | 5.35075E-06 | 0.006597043 |
| 1232.959977 | 240.129637 | 5.41939E-06 | 0.006681893 |
| 1232.999977 | 243.603986 | 5.4978E-06  | 0.006778791 |
| 1233.039977 | 250.192533 | 5.6465E-06  | 0.006962357 |
| 1233.079977 | 261.550877 | 5.90284E-06 | 0.007278673 |
| 1233.119977 | 302.365918 | 6.82398E-06 | 0.008414783 |
| 1233.159977 | 358.136583 | 8.08264E-06 | 0.009967193 |
| 1233.199977 | 393.203138 | 8.87405E-06 | 0.010943475 |
| 1233.239977 | 378.931536 | 8.55196E-06 | 0.010546615 |
| 1233.279977 | 358.396551 | 8.08851E-06 | 0.009975399 |
| 1233.319977 | 360.887111 | 8.14472E-06 | 0.010045045 |
| 1233.359977 | 342.982406 | 7.74064E-06 | 0.00954699  |
| 1233.399977 | 297.834361 | 6.72171E-06 | 0.008290553 |
| 1233.439977 | 253.165693 | 5.7136E-06  | 0.007047379 |
| 1233.479977 | 251.020876 | 5.66519E-06 | 0.0069879   |
| 1233.519977 | 237.95297  | 5.37027E-06 | 0.006624332 |
| 1233.559977 | 191.445615 | 4.32066E-06 | 0.005329794 |
| 1233.599977 | 182.5763   | 4.12049E-06 | 0.00508304  |
| 1233.639977 | 199.283722 | 4.49756E-06 | 0.005548365 |
| 1233.679977 | 215.249564 | 4.85788E-06 | 0.005993073 |
| 1233.719977 | 212.638144 | 4.79895E-06 | 0.005920556 |
| 1233.759977 | 208.180696 | 4.69835E-06 | 0.005796634 |

|             |            |             |             |
|-------------|------------|-------------|-------------|
| 1233.799977 | 199.399907 | 4.50018E-06 | 0.00555232  |
| 1233.839977 | 193.84078  | 4.37472E-06 | 0.0053977   |
| 1233.879977 | 211.574218 | 4.77494E-06 | 0.005891697 |
| 1233.919977 | 228.730816 | 5.16214E-06 | 0.006369663 |
| 1233.959977 | 224.080515 | 5.05719E-06 | 0.006240364 |
| 1233.999977 | 202.161344 | 4.5625E-06  | 0.005630125 |
| 1234.039977 | 206.562953 | 4.66184E-06 | 0.005752895 |
| 1234.079977 | 242.775109 | 5.4791E-06  | 0.006761643 |
| 1234.119977 | 278.886327 | 6.29408E-06 | 0.007767645 |
| 1234.159977 | 327.099176 | 7.38217E-06 | 0.009110782 |
| 1234.199977 | 358.358957 | 8.08766E-06 | 0.009981793 |
| 1234.239977 | 363.980461 | 8.21453E-06 | 0.010138704 |
| 1234.279977 | 380.825261 | 8.5947E-06  | 0.010608261 |
| 1234.319977 | 385.497371 | 8.70014E-06 | 0.010738755 |
| 1234.359977 | 355.373654 | 8.02029E-06 | 0.009899923 |
| 1234.399977 | 293.9361   | 6.63373E-06 | 0.008188674 |
| 1234.439977 | 239.184182 | 5.39805E-06 | 0.006663573 |
| 1234.479977 | 211.719817 | 4.77822E-06 | 0.005898619 |
| 1234.519977 | 198.699683 | 4.48438E-06 | 0.005536051 |
| 1234.559977 | 194.578375 | 4.39136E-06 | 0.005421401 |
| 1234.599977 | 199.099402 | 4.4934E-06  | 0.005547547 |
| 1234.639977 | 211.604679 | 4.77562E-06 | 0.005896175 |
| 1234.679977 | 217.468732 | 4.90797E-06 | 0.006059768 |
| 1234.719977 | 234.997249 | 5.30356E-06 | 0.006548412 |
| 1234.759977 | 257.509244 | 5.81162E-06 | 0.007175962 |
| 1234.799977 | 257.001471 | 5.80017E-06 | 0.007162044 |
| 1234.839977 | 246.895836 | 5.5721E-06  | 0.006880646 |
| 1234.879977 | 242.88689  | 5.48162E-06 | 0.006769141 |
| 1234.919977 | 252.444044 | 5.69731E-06 | 0.007035722 |
| 1234.959977 | 266.604672 | 6.0169E-06  | 0.007430626 |
| 1234.999977 | 296.229321 | 6.68548E-06 | 0.008256572 |
| 1235.039977 | 317.979156 | 7.17635E-06 | 0.008863075 |
| 1235.079977 | 307.512889 | 6.94014E-06 | 0.008571625 |
| 1235.119977 | 319.057002 | 7.20067E-06 | 0.008893694 |
| 1235.159977 | 321.811946 | 7.26285E-06 | 0.008970778 |
| 1235.199977 | 344.832945 | 7.7824E-06  | 0.009612819 |
| 1235.239977 | 385.670896 | 8.70405E-06 | 0.010751597 |
| 1235.279977 | 396.613739 | 8.95102E-06 | 0.011057015 |
| 1235.319977 | 368.85389  | 8.32452E-06 | 0.010283444 |
| 1235.359977 | 341.892128 | 7.71603E-06 | 0.009532074 |
| 1235.399977 | 314.078639 | 7.08832E-06 | 0.008756907 |
| 1235.439977 | 270.720664 | 6.10979E-06 | 0.007548277 |
| 1235.479977 | 220.873606 | 4.98481E-06 | 0.006158632 |
| 1235.519977 | 203.949093 | 4.60285E-06 | 0.005686909 |
| 1235.559977 | 192.426688 | 4.3428E-06  | 0.005365793 |
| 1235.599977 | 202.360542 | 4.567E-06   | 0.00564298  |

|             |            |             |             |
|-------------|------------|-------------|-------------|
| 1235.639977 | 226.237588 | 5.10587E-06 | 0.006309014 |
| 1235.679977 | 241.755228 | 5.45608E-06 | 0.006741967 |
| 1235.719977 | 233.265734 | 5.26448E-06 | 0.006505426 |
| 1235.759977 | 219.11068  | 4.94502E-06 | 0.006110861 |
| 1235.799977 | 224.823386 | 5.07395E-06 | 0.006270388 |
| 1235.839977 | 233.156024 | 5.26201E-06 | 0.006502998 |
| 1235.879977 | 222.902542 | 5.0306E-06  | 0.006217218 |
| 1235.919977 | 205.178323 | 4.63059E-06 | 0.005723037 |
| 1235.959977 | 211.966758 | 4.78379E-06 | 0.005912579 |
| 1235.999977 | 229.503979 | 5.17959E-06 | 0.006401967 |
| 1236.039977 | 236.867761 | 5.34578E-06 | 0.006607592 |
| 1236.079977 | 256.574288 | 5.79052E-06 | 0.007157551 |
| 1236.119977 | 297.94925  | 6.7243E-06  | 0.008312041 |
| 1236.159977 | 299.126081 | 6.75086E-06 | 0.008345142 |
| 1236.199977 | 305.694741 | 6.8991E-06  | 0.008528673 |
| 1236.239977 | 353.506497 | 7.97815E-06 | 0.009862907 |
| 1236.279977 | 386.966339 | 8.73329E-06 | 0.010796793 |
| 1236.319977 | 370.198164 | 8.35486E-06 | 0.010329277 |
| 1236.359977 | 330.642703 | 7.46215E-06 | 0.009225898 |
| 1236.399977 | 310.418796 | 7.00572E-06 | 0.008661872 |
| 1236.439977 | 304.064383 | 6.86231E-06 | 0.008484834 |
| 1236.479977 | 254.806795 | 5.75063E-06 | 0.007110544 |
| 1236.519977 | 211.813608 | 4.78034E-06 | 0.005910984 |
| 1236.559977 | 191.229127 | 4.31578E-06 | 0.005336715 |
| 1236.599977 | 183.636941 | 4.14443E-06 | 0.005125002 |
| 1236.639977 | 176.125347 | 3.9749E-06  | 0.004915525 |
| 1236.679977 | 197.67379  | 4.46122E-06 | 0.005517104 |
| 1236.719977 | 237.108613 | 5.35121E-06 | 0.00661795  |
| 1236.759977 | 270.736642 | 6.11015E-06 | 0.007556788 |
| 1236.799977 | 282.323122 | 6.37164E-06 | 0.007880444 |
| 1236.839977 | 272.098797 | 6.14089E-06 | 0.007595299 |
| 1236.879977 | 288.185192 | 6.50394E-06 | 0.008044591 |
| 1236.919977 | 280.177126 | 6.32321E-06 | 0.007821302 |
| 1236.959977 | 254.85078  | 5.75163E-06 | 0.007114533 |
| 1236.999977 | 248.197576 | 5.60147E-06 | 0.006929023 |
| 1237.039977 | 272.265266 | 6.14465E-06 | 0.007601175 |
| 1237.079977 | 294.434163 | 6.64497E-06 | 0.008220358 |
| 1237.119977 | 319.951467 | 7.22086E-06 | 0.008933069 |
| 1237.159977 | 334.396015 | 7.54685E-06 | 0.009336664 |
| 1237.199977 | 382.962127 | 8.64292E-06 | 0.010693023 |
| 1237.239977 | 422.175457 | 9.52791E-06 | 0.011788314 |
| 1237.279977 | 432.63146  | 9.76389E-06 | 0.012080665 |
| 1237.319977 | 404.694895 | 9.1334E-06  | 0.011300938 |
| 1237.359977 | 341.258947 | 7.70174E-06 | 0.009529824 |
| 1237.399977 | 269.065063 | 6.07242E-06 | 0.007514017 |
| 1237.439977 | 244.378678 | 5.51529E-06 | 0.006824836 |



|             |            |             |             |
|-------------|------------|-------------|-------------|
| 1237.479977 | 249.636476 | 5.63395E-06 | 0.006971897 |
| 1237.519977 | 224.910795 | 5.07592E-06 | 0.006281557 |
| 1237.559977 | 196.366239 | 4.43171E-06 | 0.00548451  |
| 1237.599977 | 179.355421 | 4.0478E-06  | 0.00500956  |
| 1237.639977 | 183.307061 | 4.13699E-06 | 0.005120098 |
| 1237.679977 | 203.293759 | 4.58806E-06 | 0.005678546 |
| 1237.719977 | 220.052687 | 4.96628E-06 | 0.006146867 |
| 1237.759977 | 228.525805 | 5.15751E-06 | 0.006383758 |
| 1237.799977 | 238.743146 | 5.3881E-06  | 0.00666939  |
| 1237.839977 | 234.588991 | 5.29435E-06 | 0.006553554 |
| 1237.879977 | 227.459176 | 5.13344E-06 | 0.006354579 |
| 1237.919977 | 230.816988 | 5.20922E-06 | 0.006448595 |
| 1237.959977 | 231.45786  | 5.22368E-06 | 0.006466709 |
| 1237.999977 | 212.280459 | 4.79087E-06 | 0.005931102 |
| 1238.039977 | 196.513872 | 4.43504E-06 | 0.005490762 |
| 1238.079977 | 227.547219 | 5.13542E-06 | 0.006358065 |
| 1238.119977 | 270.543537 | 6.10579E-06 | 0.007559702 |
| 1238.159977 | 301.814741 | 6.81154E-06 | 0.008433774 |
| 1238.199977 | 325.687386 | 7.35031E-06 | 0.009101154 |
| 1238.239977 | 334.702316 | 7.55377E-06 | 0.009353374 |
| 1238.279977 | 358.936509 | 8.1007E-06  | 0.010030931 |
| 1238.319977 | 375.751049 | 8.48018E-06 | 0.010501174 |
| 1238.359977 | 350.219179 | 7.90396E-06 | 0.009787947 |
| 1238.399977 | 319.982147 | 7.22155E-06 | 0.008943169 |
| 1238.439977 | 281.637376 | 6.35616E-06 | 0.007871727 |
| 1238.479977 | 230.014241 | 5.1911E-06  | 0.006429075 |
| 1238.519977 | 195.554866 | 4.4134E-06  | 0.005466085 |
| 1238.559977 | 182.028184 | 4.10812E-06 | 0.005088156 |
| 1238.599977 | 184.878076 | 4.17244E-06 | 0.005167985 |
| 1238.639977 | 184.110106 | 4.15511E-06 | 0.005146684 |
| 1238.679977 | 191.523137 | 4.32241E-06 | 0.005354083 |
| 1238.719977 | 238.5427   | 5.38358E-06 | 0.006668744 |
| 1238.759977 | 266.42878  | 6.01293E-06 | 0.007448573 |
| 1238.799977 | 266.110207 | 6.00574E-06 | 0.007439906 |
| 1238.839977 | 236.832378 | 5.34498E-06 | 0.006621571 |
| 1238.879977 | 219.061839 | 4.94392E-06 | 0.006124924 |
| 1238.919977 | 216.187944 | 4.87906E-06 | 0.006044766 |
| 1238.959977 | 217.854951 | 4.91668E-06 | 0.006091573 |
| 1238.999977 | 234.560096 | 5.29369E-06 | 0.006558888 |
| 1239.039977 | 259.349744 | 5.85316E-06 | 0.007252302 |
| 1239.079977 | 302.499217 | 6.82699E-06 | 0.008459182 |
| 1239.119977 | 332.693706 | 7.50843E-06 | 0.00930385  |
| 1239.159977 | 348.527215 | 7.86577E-06 | 0.009746952 |
| 1239.199977 | 370.010578 | 8.35062E-06 | 0.010348092 |
| 1239.239977 | 376.882968 | 8.50572E-06 | 0.010540633 |
| 1239.279977 | 370.09607  | 8.35255E-06 | 0.010351151 |

|             |            |             |             |
|-------------|------------|-------------|-------------|
| 1239.319977 | 346.401872 | 7.81781E-06 | 0.009688765 |
| 1239.359977 | 328.342073 | 7.41022E-06 | 0.009183934 |
| 1239.399977 | 309.403817 | 6.98281E-06 | 0.008654499 |
| 1239.439977 | 275.432943 | 6.21614E-06 | 0.00770453  |
| 1239.479977 | 265.96483  | 6.00246E-06 | 0.007439924 |
| 1239.519977 | 267.207649 | 6.0305E-06  | 0.007474931 |
| 1239.559977 | 229.447902 | 5.17832E-06 | 0.006418838 |
| 1239.599977 | 204.107399 | 4.60642E-06 | 0.005710118 |
| 1239.639977 | 207.348705 | 4.67957E-06 | 0.005800984 |
| 1239.679977 | 199.265209 | 4.49714E-06 | 0.005575012 |
| 1239.719977 | 198.465807 | 4.4791E-06  | 0.005552826 |
| 1239.759977 | 220.336426 | 4.97269E-06 | 0.006164937 |
| 1239.799977 | 210.460855 | 4.74981E-06 | 0.005888812 |
| 1239.839977 | 206.722667 | 4.66544E-06 | 0.005784402 |
| 1239.879977 | 210.855387 | 4.75871E-06 | 0.005900232 |
| 1239.919977 | 208.982934 | 4.71645E-06 | 0.005848025 |
| 1239.959977 | 219.452546 | 4.95274E-06 | 0.006141197 |
| 1239.999977 | 214.803614 | 4.84782E-06 | 0.006011295 |
| 1240.039977 | 216.447732 | 4.88492E-06 | 0.006057501 |
| 1240.079977 | 219.69729  | 4.95826E-06 | 0.006148641 |
| 1240.119977 | 234.726776 | 5.29746E-06 | 0.006569481 |
| 1240.159977 | 294.388119 | 6.64393E-06 | 0.008239536 |
| 1240.199977 | 333.894578 | 7.53554E-06 | 0.009345571 |
| 1240.239977 | 340.690661 | 7.68891E-06 | 0.009536098 |
| 1240.279977 | 330.516605 | 7.4593E-06  | 0.00925162  |
| 1240.319977 | 310.032604 | 6.997E-06   | 0.008678524 |
| 1240.359977 | 304.010429 | 6.86109E-06 | 0.008510224 |
| 1240.399977 | 277.94742  | 6.27289E-06 | 0.007780888 |
| 1240.439977 | 249.194458 | 5.62397E-06 | 0.006976199 |
| 1240.479977 | 217.731709 | 4.9139E-06  | 0.006095596 |
| 1240.519977 | 179.286113 | 4.04624E-06 | 0.005019439 |
| 1240.559977 | 151.166148 | 3.41161E-06 | 0.004232306 |
| 1240.599977 | 153.711477 | 3.46905E-06 | 0.004303708 |
| 1240.639977 | 193.81749  | 4.37419E-06 | 0.005426796 |
| 1240.679977 | 217.855368 | 4.91669E-06 | 0.006100042 |
| 1240.719977 | 239.885542 | 5.41388E-06 | 0.006717112 |
| 1240.759977 | 268.85142  | 6.0676E-06  | 0.007528438 |
| 1240.799977 | 280.504546 | 6.3306E-06  | 0.007855004 |
| 1240.839977 | 262.236861 | 5.91832E-06 | 0.007343689 |
| 1240.879977 | 230.335672 | 5.19836E-06 | 0.006450535 |
| 1240.919977 | 204.992695 | 4.6264E-06  | 0.005740992 |
| 1240.959977 | 218.20775  | 4.92464E-06 | 0.006111287 |
| 1240.999977 | 244.244135 | 5.51225E-06 | 0.006840702 |
| 1241.039977 | 263.58615  | 5.94877E-06 | 0.007382664 |
| 1241.079977 | 272.989005 | 6.16098E-06 | 0.007646271 |
| 1241.119977 | 275.877188 | 6.22616E-06 | 0.007727416 |

|             |            |             |             |
|-------------|------------|-------------|-------------|
| 1241.159977 | 273.364004 | 6.16944E-06 | 0.007657268 |
| 1241.199977 | 296.056724 | 6.68159E-06 | 0.008293187 |
| 1241.239977 | 318.202386 | 7.18138E-06 | 0.008913822 |
| 1241.279977 | 329.926666 | 7.44599E-06 | 0.009242552 |
| 1241.319977 | 337.361161 | 7.61377E-06 | 0.009451127 |
| 1241.359977 | 308.972684 | 6.97308E-06 | 0.008656106 |
| 1241.399977 | 288.305543 | 6.50665E-06 | 0.008077361 |
| 1241.439977 | 276.894505 | 6.24912E-06 | 0.007757911 |
| 1241.479977 | 257.751822 | 5.8171E-06  | 0.007221813 |
| 1241.519977 | 224.691381 | 5.07097E-06 | 0.006295712 |
| 1241.559977 | 185.31035  | 4.1822E-06  | 0.005192448 |
| 1241.599977 | 164.842548 | 3.72027E-06 | 0.004619083 |
| 1241.639977 | 173.677045 | 3.91965E-06 | 0.004866793 |
| 1241.679977 | 184.300617 | 4.15941E-06 | 0.005164654 |
| 1241.719977 | 188.126434 | 4.24575E-06 | 0.005272035 |
| 1241.759977 | 201.969607 | 4.55817E-06 | 0.005660156 |
| 1241.799977 | 197.211278 | 4.45078E-06 | 0.005526983 |
| 1241.839977 | 175.958151 | 3.97113E-06 | 0.004931508 |
| 1241.879977 | 157.278855 | 3.54956E-06 | 0.004408133 |
| 1241.919977 | 145.719145 | 3.28868E-06 | 0.004084275 |
| 1241.959977 | 163.033464 | 3.67944E-06 | 0.004569715 |
| 1241.999977 | 186.19725  | 4.20221E-06 | 0.005219148 |
| 1242.039977 | 212.466866 | 4.79508E-06 | 0.005955683 |
| 1242.079977 | 234.935637 | 5.30217E-06 | 0.006585719 |
| 1242.119977 | 260.54707  | 5.88018E-06 | 0.007303895 |
| 1242.159977 | 301.654735 | 6.80793E-06 | 0.008456535 |
| 1242.199977 | 312.702942 | 7.05727E-06 | 0.00876654  |
| 1242.239977 | 305.503863 | 6.8948E-06  | 0.008564992 |
| 1242.279977 | 325.028195 | 7.33543E-06 | 0.009112662 |
| 1242.319977 | 341.762577 | 7.71311E-06 | 0.009582145 |
| 1242.359977 | 325.165209 | 7.33853E-06 | 0.009117091 |
| 1242.399977 | 298.469067 | 6.73603E-06 | 0.008368845 |
| 1242.439977 | 253.374362 | 5.71831E-06 | 0.007104653 |
| 1242.479977 | 209.483003 | 4.72774E-06 | 0.005874122 |
| 1242.519977 | 195.292609 | 4.40748E-06 | 0.005476385 |
| 1242.559977 | 187.699159 | 4.23611E-06 | 0.005263619 |
| 1242.599977 | 199.851807 | 4.51038E-06 | 0.005604594 |
| 1242.639977 | 204.225491 | 4.60908E-06 | 0.005727433 |
| 1242.679977 | 199.336112 | 4.49874E-06 | 0.005590492 |
| 1242.719977 | 216.694092 | 4.89048E-06 | 0.006077502 |
| 1242.759977 | 237.04332  | 5.34974E-06 | 0.00664844  |
| 1242.799977 | 225.763995 | 5.09518E-06 | 0.006332288 |
| 1242.839977 | 210.365395 | 4.74765E-06 | 0.005900574 |
| 1242.879977 | 212.647765 | 4.79916E-06 | 0.005964785 |
| 1242.919977 | 234.617216 | 5.29498E-06 | 0.006581241 |
| 1242.959977 | 231.354368 | 5.22135E-06 | 0.006489924 |

|             |            |             |             |
|-------------|------------|-------------|-------------|
| 1242.999977 | 228.055316 | 5.14689E-06 | 0.006397585 |
| 1243.039977 | 256.423663 | 5.78712E-06 | 0.007193628 |
| 1243.079977 | 286.752254 | 6.4716E-06  | 0.008044715 |
| 1243.119977 | 302.93968  | 6.83693E-06 | 0.00849912  |
| 1243.159977 | 322.839368 | 7.28603E-06 | 0.009057707 |
| 1243.199977 | 342.080626 | 7.72028E-06 | 0.009597856 |
| 1243.239977 | 363.877879 | 8.21222E-06 | 0.010209756 |
| 1243.279977 | 372.229931 | 8.40071E-06 | 0.010444436 |
| 1243.319977 | 348.57028  | 7.86675E-06 | 0.009780882 |
| 1243.359977 | 306.756373 | 6.92306E-06 | 0.008607861 |
| 1243.399977 | 253.035982 | 5.71067E-06 | 0.007100647 |
| 1243.439977 | 211.326571 | 4.76935E-06 | 0.005930396 |
| 1243.479977 | 201.739106 | 4.55297E-06 | 0.005661528 |
| 1243.519977 | 196.534711 | 4.43551E-06 | 0.005515651 |
| 1243.559977 | 204.122029 | 4.60675E-06 | 0.00572877  |
| 1243.599977 | 191.625508 | 4.32472E-06 | 0.005378223 |
| 1243.639977 | 180.140382 | 4.06552E-06 | 0.00505604  |
| 1243.679977 | 173.892903 | 3.92452E-06 | 0.004880848 |
| 1243.719977 | 197.332474 | 4.45352E-06 | 0.005538931 |
| 1243.759977 | 208.265258 | 4.70026E-06 | 0.005845991 |
| 1243.799977 | 211.6728   | 4.77716E-06 | 0.005941832 |
| 1243.839977 | 217.228283 | 4.90254E-06 | 0.006097975 |
| 1243.879977 | 210.174494 | 4.74335E-06 | 0.005900153 |
| 1243.919977 | 196.592702 | 4.43682E-06 | 0.005519053 |
| 1243.959977 | 206.119672 | 4.65183E-06 | 0.005786695 |
| 1243.999977 | 247.626577 | 5.58859E-06 | 0.006952202 |
| 1244.039977 | 253.195374 | 5.71427E-06 | 0.007108776 |
| 1244.079977 | 240.687508 | 5.43198E-06 | 0.00675782  |
| 1244.119977 | 263.901934 | 5.9559E-06  | 0.007409853 |
| 1244.159977 | 313.953012 | 7.08548E-06 | 0.008815473 |
| 1244.199977 | 345.374502 | 7.79462E-06 | 0.009698068 |
| 1244.239977 | 338.18533  | 7.63237E-06 | 0.009496502 |
| 1244.279977 | 332.819029 | 7.51126E-06 | 0.009346113 |
| 1244.319977 | 325.124808 | 7.33761E-06 | 0.00913034  |
| 1244.359977 | 315.152651 | 7.11256E-06 | 0.00885058  |
| 1244.399977 | 312.790811 | 7.05925E-06 | 0.008784534 |
| 1244.439977 | 272.861506 | 6.1581E-06  | 0.007663391 |
| 1244.479977 | 231.257306 | 5.21916E-06 | 0.006495134 |
| 1244.519977 | 197.221183 | 4.45101E-06 | 0.005539368 |
| 1244.559977 | 181.122307 | 4.08768E-06 | 0.005087361 |
| 1244.599977 | 194.373107 | 4.38673E-06 | 0.005459724 |
| 1244.639977 | 210.920126 | 4.76017E-06 | 0.005924702 |
| 1244.679977 | 209.609412 | 4.73059E-06 | 0.005888074 |
| 1244.719977 | 209.318473 | 4.72403E-06 | 0.00588009  |
| 1244.759977 | 243.161421 | 5.48781E-06 | 0.006831012 |
| 1244.799977 | 275.141957 | 6.20957E-06 | 0.007729673 |

|             |            |             |             |
|-------------|------------|-------------|-------------|
| 1244.839977 | 270.683331 | 6.10895E-06 | 0.00760466  |
| 1244.879977 | 257.421325 | 5.80964E-06 | 0.007232305 |
| 1244.919977 | 215.347142 | 4.86009E-06 | 0.006050417 |
| 1244.959977 | 178.5109   | 4.02874E-06 | 0.005015623 |
| 1244.999977 | 213.466411 | 4.81764E-06 | 0.005997961 |
| 1245.039977 | 256.120814 | 5.78029E-06 | 0.007196692 |
| 1245.079977 | 269.060963 | 6.07233E-06 | 0.007560538 |
| 1245.119977 | 289.029525 | 6.52299E-06 | 0.00812191  |
| 1245.159977 | 317.922382 | 7.17507E-06 | 0.008934104 |
| 1245.199977 | 361.079365 | 8.14906E-06 | 0.010147207 |
| 1245.239977 | 401.877917 | 9.06982E-06 | 0.011294108 |
| 1245.279977 | 378.697131 | 8.54667E-06 | 0.010642993 |
| 1245.319977 | 341.729776 | 7.71237E-06 | 0.009604362 |
| 1245.359977 | 310.677295 | 7.01155E-06 | 0.008731908 |
| 1245.399977 | 286.867711 | 6.4742E-06  | 0.008062974 |
| 1245.439977 | 289.010617 | 6.52257E-06 | 0.008123466 |
| 1245.479977 | 268.719487 | 6.06462E-06 | 0.007553368 |
| 1245.519977 | 220.003418 | 4.96517E-06 | 0.006184219 |
| 1245.559977 | 204.832343 | 4.62278E-06 | 0.005757951 |
| 1245.599977 | 217.698849 | 4.91316E-06 | 0.006119832 |
| 1245.639977 | 224.538697 | 5.06753E-06 | 0.006312313 |
| 1245.679977 | 223.694399 | 5.04847E-06 | 0.006288779 |
| 1245.719977 | 232.855896 | 5.25523E-06 | 0.006546549 |
| 1245.759977 | 228.587658 | 5.15891E-06 | 0.006426757 |
| 1245.799977 | 223.100272 | 5.03506E-06 | 0.006272681 |
| 1245.839977 | 226.467525 | 5.11106E-06 | 0.006367559 |
| 1245.879977 | 227.738625 | 5.13974E-06 | 0.006403504 |
| 1245.919977 | 212.615108 | 4.79843E-06 | 0.005978456 |
| 1245.959977 | 215.35209  | 4.8602E-06  | 0.006055611 |
| 1245.999977 | 223.185874 | 5.03699E-06 | 0.006276095 |
| 1246.039977 | 217.075598 | 4.89909E-06 | 0.006104467 |
| 1246.079977 | 222.884322 | 5.03019E-06 | 0.006268017 |
| 1246.119977 | 237.407535 | 5.35796E-06 | 0.006676658 |
| 1246.159977 | 265.485054 | 5.99163E-06 | 0.007466527 |
| 1246.199977 | 303.229031 | 6.84346E-06 | 0.008528316 |
| 1246.239977 | 324.702264 | 7.32808E-06 | 0.009132544 |
| 1246.279977 | 314.24087  | 7.09198E-06 | 0.008838591 |
| 1246.319977 | 323.679383 | 7.30499E-06 | 0.009104358 |
| 1246.359977 | 323.875622 | 7.30942E-06 | 0.009110171 |
| 1246.399977 | 285.554515 | 6.44457E-06 | 0.008032509 |
| 1246.439977 | 248.191929 | 5.60135E-06 | 0.006981742 |
| 1246.479977 | 216.182264 | 4.87893E-06 | 0.006081492 |
| 1246.519977 | 197.469107 | 4.4566E-06  | 0.005555244 |
| 1246.559977 | 212.614664 | 4.79842E-06 | 0.005981514 |
| 1246.599977 | 224.494057 | 5.06652E-06 | 0.006315921 |
| 1246.639977 | 231.752504 | 5.23033E-06 | 0.00652034  |

|             |            |             |             |
|-------------|------------|-------------|-------------|
| 1246.679977 | 215.812811 | 4.87059E-06 | 0.006072073 |
| 1246.719977 | 190.548081 | 4.3004E-06  | 0.005361401 |
| 1246.759977 | 198.983956 | 4.49079E-06 | 0.005598938 |
| 1246.799977 | 238.220912 | 5.37631E-06 | 0.006703188 |
| 1246.839977 | 258.912819 | 5.8433E-06  | 0.007285662 |
| 1246.879977 | 231.866759 | 5.23291E-06 | 0.00652481  |
| 1246.919977 | 207.760351 | 4.68886E-06 | 0.005846635 |
| 1246.959977 | 210.321326 | 4.74666E-06 | 0.005918894 |
| 1246.999977 | 229.328562 | 5.17563E-06 | 0.006454006 |
| 1247.039977 | 247.662887 | 5.58941E-06 | 0.006970213 |
| 1247.079977 | 250.299864 | 5.64892E-06 | 0.007044654 |
| 1247.119977 | 266.636778 | 6.01762E-06 | 0.007504695 |
| 1247.159977 | 328.81123  | 7.42081E-06 | 0.009254939 |
| 1247.199977 | 374.363613 | 8.44887E-06 | 0.010537425 |
| 1247.239977 | 373.384315 | 8.42676E-06 | 0.010510197 |
| 1247.279977 | 358.763042 | 8.09678E-06 | 0.010098954 |
| 1247.319977 | 331.724436 | 7.48656E-06 | 0.009338134 |
| 1247.359977 | 319.009042 | 7.19959E-06 | 0.00898048  |
| 1247.399977 | 310.402342 | 7.00535E-06 | 0.008738472 |
| 1247.439977 | 290.506881 | 6.55634E-06 | 0.008178635 |
| 1247.479977 | 253.519362 | 5.72158E-06 | 0.007137555 |
| 1247.519977 | 211.436655 | 4.77183E-06 | 0.005952954 |
| 1247.559977 | 188.417289 | 4.25232E-06 | 0.005305019 |
| 1247.599977 | 186.83319  | 4.21656E-06 | 0.005260586 |
| 1247.639977 | 187.692357 | 4.23596E-06 | 0.005284947 |
| 1247.679977 | 218.66481  | 4.93496E-06 | 0.006157251 |
| 1247.719977 | 240.702002 | 5.43231E-06 | 0.006778    |
| 1247.759977 | 233.792713 | 5.27638E-06 | 0.006583651 |
| 1247.799977 | 230.235051 | 5.19608E-06 | 0.006483674 |
| 1247.839977 | 242.446092 | 5.47167E-06 | 0.006827769 |
| 1247.879977 | 230.747391 | 5.20765E-06 | 0.006498519 |
| 1247.919977 | 223.958276 | 5.05443E-06 | 0.00630752  |
| 1247.959977 | 232.193345 | 5.24028E-06 | 0.00653966  |
| 1247.999977 | 234.270278 | 5.28715E-06 | 0.006598368 |
| 1248.039977 | 242.349484 | 5.46949E-06 | 0.006826143 |
| 1248.079977 | 256.870553 | 5.79721E-06 | 0.007235382 |
| 1248.119977 | 265.840207 | 5.99964E-06 | 0.007488275 |
| 1248.159977 | 301.134201 | 6.79618E-06 | 0.008482719 |
| 1248.199977 | 341.702373 | 7.71175E-06 | 0.009625802 |
| 1248.239977 | 353.56516  | 7.97947E-06 | 0.009960297 |
| 1248.279977 | 347.194021 | 7.83569E-06 | 0.009781129 |
| 1248.319977 | 357.220021 | 8.06196E-06 | 0.010063904 |
| 1248.359977 | 350.717747 | 7.91521E-06 | 0.009881033 |
| 1248.399977 | 337.218635 | 7.61055E-06 | 0.009501017 |
| 1248.439977 | 301.167157 | 6.79692E-06 | 0.008485551 |
| 1248.479977 | 263.02846  | 5.93619E-06 | 0.007411209 |

|             |            |             |             |
|-------------|------------|-------------|-------------|
| 1248.519977 | 251.215308 | 5.66958E-06 | 0.007078583 |
| 1248.559977 | 253.628857 | 5.72405E-06 | 0.00714682  |
| 1248.599977 | 266.70763  | 6.01922E-06 | 0.007515598 |
| 1248.639977 | 297.030927 | 6.70357E-06 | 0.008370351 |
| 1248.679977 | 312.350664 | 7.04932E-06 | 0.008802344 |
| 1248.719977 | 308.15774  | 6.95469E-06 | 0.008684462 |
| 1248.759977 | 332.065264 | 7.49425E-06 | 0.00935852  |
| 1248.799977 | 348.820479 | 7.87239E-06 | 0.009831043 |
| 1248.839977 | 334.752607 | 7.5549E-06  | 0.009434861 |
| 1248.879977 | 322.89531  | 7.2873E-06  | 0.00910096  |
| 1248.919977 | 321.028316 | 7.24516E-06 | 0.009048627 |
| 1248.959977 | 332.833186 | 7.51158E-06 | 0.009381665 |
| 1248.999977 | 336.024161 | 7.5836E-06  | 0.009471913 |
| 1249.039977 | 337.942983 | 7.6269E-06  | 0.009526306 |
| 1249.079977 | 369.477859 | 8.3386E-06  | 0.010415579 |
| 1249.119977 | 386.363366 | 8.71968E-06 | 0.01089193  |
| 1249.159977 | 403.201742 | 9.0997E-06  | 0.011366983 |
| 1249.199977 | 442.790545 | 9.99317E-06 | 0.012483463 |
| 1249.239977 | 450.89572  | 1.01761E-05 | 0.012712376 |
| 1249.279977 | 416.621051 | 9.40256E-06 | 0.011746426 |
| 1249.319977 | 409.869692 | 9.25019E-06 | 0.011556445 |
| 1249.359977 | 380.026299 | 8.57666E-06 | 0.010715341 |
| 1249.399977 | 319.556759 | 7.21195E-06 | 0.009010611 |
| 1249.439977 | 282.292465 | 6.37095E-06 | 0.007960117 |
| 1249.479977 | 241.783578 | 5.45672E-06 | 0.006818061 |
| 1249.519977 | 219.864853 | 4.96204E-06 | 0.006200172 |
| 1249.559977 | 208.161386 | 4.69791E-06 | 0.005870323 |
| 1249.599977 | 205.063659 | 4.628E-06   | 0.00578315  |
| 1249.639977 | 221.165854 | 4.99141E-06 | 0.00623746  |
| 1249.679977 | 244.188577 | 5.511E-06   | 0.006886981 |
| 1249.719977 | 255.261084 | 5.76089E-06 | 0.007199496 |
| 1249.759977 | 257.270598 | 5.80624E-06 | 0.007256405 |
| 1249.799977 | 273.085196 | 6.16315E-06 | 0.007702708 |
| 1249.839977 | 300.147879 | 6.77392E-06 | 0.008466315 |
| 1249.879977 | 283.620614 | 6.40092E-06 | 0.008000385 |
| 1249.919977 | 265.243151 | 5.98617E-06 | 0.007482232 |
| 1249.959977 | 274.626692 | 6.19794E-06 | 0.007747179 |
| 1249.999977 | 292.787544 | 6.60781E-06 | 0.008259759 |
| 1250.039977 | 293.584129 | 6.62578E-06 | 0.008282496 |
| 1250.079977 | 281.121432 | 6.34452E-06 | 0.007931156 |
| 1250.119977 | 277.554393 | 6.26402E-06 | 0.007830772 |
| 1250.159977 | 312.676059 | 7.05666E-06 | 0.008821958 |
| 1250.199977 | 364.872606 | 8.23467E-06 | 0.01029498  |
| 1250.239977 | 374.156334 | 8.44419E-06 | 0.010557261 |
| 1250.279977 | 342.792517 | 7.73635E-06 | 0.009672603 |
| 1250.319977 | 314.670592 | 7.10168E-06 | 0.008879369 |

|             |            |             |             |
|-------------|------------|-------------|-------------|
| 1250.359977 | 297.441937 | 6.71285E-06 | 0.008393479 |
| 1250.399977 | 290.197303 | 6.54935E-06 | 0.008189306 |
| 1250.439977 | 288.285397 | 6.5062E-06  | 0.008135612 |
| 1250.479977 | 260.523661 | 5.87966E-06 | 0.007352392 |
| 1250.519977 | 213.252858 | 4.81282E-06 | 0.006018528 |
| 1250.559977 | 187.614806 | 4.2342E-06  | 0.005295127 |
| 1250.599977 | 167.57238  | 3.78188E-06 | 0.004729613 |
| 1250.639977 | 163.019043 | 3.67911E-06 | 0.004601245 |
| 1250.679977 | 196.645304 | 4.43801E-06 | 0.005550531 |
| 1250.719977 | 214.373646 | 4.83811E-06 | 0.006051127 |
| 1250.759977 | 209.105546 | 4.71922E-06 | 0.005902613 |
| 1250.799977 | 220.338663 | 4.97274E-06 | 0.006219899 |
| 1250.839977 | 230.521445 | 5.20255E-06 | 0.006507555 |
| 1250.879977 | 239.335618 | 5.40147E-06 | 0.006756593 |
| 1250.919977 | 232.762216 | 5.25312E-06 | 0.006571232 |
| 1250.959977 | 257.889622 | 5.82021E-06 | 0.007280849 |
| 1250.999977 | 272.636771 | 6.15303E-06 | 0.007697443 |
| 1251.039977 | 277.485351 | 6.26246E-06 | 0.007834585 |
| 1251.079977 | 281.809372 | 6.36004E-06 | 0.007956925 |
| 1251.119977 | 265.605839 | 5.99435E-06 | 0.007499656 |
| 1251.159977 | 278.815688 | 6.29248E-06 | 0.007872901 |
| 1251.199977 | 360.69313  | 8.14034E-06 | 0.010185195 |
| 1251.239977 | 433.636856 | 9.78658E-06 | 0.01224536  |
| 1251.279977 | 442.650179 | 9.99E-06    | 0.012500284 |
| 1251.319977 | 419.890795 | 9.47635E-06 | 0.011857947 |
| 1251.359977 | 364.95962  | 8.23663E-06 | 0.010306989 |
| 1251.399976 | 288.06487  | 6.50122E-06 | 0.00813563  |
| 1251.439976 | 235.901367 | 5.32397E-06 | 0.006662623 |
| 1251.479976 | 199.6958   | 4.50686E-06 | 0.00564024  |
| 1251.519976 | 181.656239 | 4.09973E-06 | 0.005130892 |
| 1251.559976 | 185.733589 | 4.19175E-06 | 0.005246225 |
| 1251.599976 | 183.602688 | 4.14366E-06 | 0.005186201 |
| 1251.639976 | 169.418985 | 3.82355E-06 | 0.004785709 |
| 1251.679976 | 180.724977 | 4.07871E-06 | 0.005105241 |
| 1251.719976 | 207.733768 | 4.68826E-06 | 0.005868391 |
| 1251.759976 | 192.243093 | 4.33866E-06 | 0.005430959 |
| 1251.799976 | 177.195268 | 3.99905E-06 | 0.005006011 |
| 1251.839976 | 167.207483 | 3.77364E-06 | 0.004723993 |
| 1251.879976 | 172.151614 | 3.88522E-06 | 0.004863832 |
| 1251.919976 | 176.950015 | 3.99352E-06 | 0.004999562 |
| 1251.959976 | 187.486515 | 4.23131E-06 | 0.00529743  |
| 1251.999976 | 214.855156 | 4.84898E-06 | 0.006070925 |
| 1252.039976 | 236.06919  | 5.32775E-06 | 0.006670559 |
| 1252.079976 | 247.609642 | 5.5882E-06  | 0.006996879 |
| 1252.119976 | 251.619783 | 5.67871E-06 | 0.007110424 |
| 1252.159976 | 281.367672 | 6.35008E-06 | 0.007951312 |



|             |            |             |             |
|-------------|------------|-------------|-------------|
| 1252.199976 | 301.449918 | 6.8033E-06  | 0.008519098 |
| 1252.239976 | 316.952737 | 7.15318E-06 | 0.0089575   |
| 1252.279976 | 338.319703 | 7.6354E-06  | 0.009561664 |
| 1252.319976 | 333.515251 | 7.52697E-06 | 0.009426181 |
| 1252.359976 | 312.364491 | 7.04963E-06 | 0.008828676 |
| 1252.399976 | 261.781226 | 5.90804E-06 | 0.007399226 |
| 1252.439976 | 222.298862 | 5.01698E-06 | 0.006283461 |
| 1252.479976 | 209.847186 | 4.73596E-06 | 0.005931693 |
| 1252.519976 | 205.603194 | 4.64018E-06 | 0.005811915 |
| 1252.559976 | 184.180928 | 4.15671E-06 | 0.005206525 |
| 1252.599976 | 187.301746 | 4.22714E-06 | 0.005294915 |
| 1252.639976 | 202.110379 | 4.56135E-06 | 0.005713729 |
| 1252.679976 | 185.785603 | 4.19292E-06 | 0.00525239  |
| 1252.719976 | 177.912823 | 4.01524E-06 | 0.005029977 |
| 1252.759976 | 208.89642  | 4.7145E-06  | 0.005906138 |
| 1252.799976 | 228.526036 | 5.15751E-06 | 0.006461334 |
| 1252.839976 | 229.050157 | 5.16934E-06 | 0.00647636  |
| 1252.879976 | 239.367916 | 5.4022E-06  | 0.006768309 |
| 1252.919976 | 242.481425 | 5.47247E-06 | 0.006856564 |
| 1252.959976 | 233.692063 | 5.2741E-06  | 0.006608242 |
| 1252.999976 | 235.41626  | 5.31302E-06 | 0.00665721  |
| 1253.039976 | 257.58705  | 5.81338E-06 | 0.007284399 |
| 1253.079976 | 274.594105 | 6.19721E-06 | 0.007765595 |
| 1253.119976 | 277.977447 | 6.27356E-06 | 0.007861528 |
| 1253.159976 | 304.5849   | 6.87406E-06 | 0.008614293 |
| 1253.199976 | 351.988845 | 7.9439E-06  | 0.009955293 |
| 1253.239976 | 391.599023 | 8.83784E-06 | 0.01107594  |
| 1253.279976 | 400.091496 | 9.02951E-06 | 0.011316501 |
| 1253.319976 | 393.432861 | 8.87923E-06 | 0.011128518 |
| 1253.359976 | 357.276282 | 8.06323E-06 | 0.010106127 |
| 1253.399976 | 295.720347 | 6.674E-06   | 0.008365187 |
| 1253.439976 | 257.348055 | 5.80799E-06 | 0.007279963 |
| 1253.479976 | 239.829671 | 5.41262E-06 | 0.006784613 |
| 1253.519976 | 220.391541 | 4.97393E-06 | 0.006234921 |
| 1253.559976 | 196.907313 | 4.44392E-06 | 0.005570725 |
| 1253.599976 | 205.925842 | 4.64746E-06 | 0.005826055 |
| 1253.639976 | 221.79179  | 5.00553E-06 | 0.006275135 |
| 1253.679976 | 218.670381 | 4.93509E-06 | 0.006187018 |
| 1253.719976 | 219.562136 | 4.95521E-06 | 0.006212448 |
| 1253.759976 | 229.962973 | 5.18994E-06 | 0.006506944 |
| 1253.799976 | 251.387691 | 5.67347E-06 | 0.007113397 |
| 1253.839976 | 260.992215 | 5.89023E-06 | 0.007385407 |
| 1253.879976 | 239.810471 | 5.41219E-06 | 0.006786235 |
| 1253.919976 | 216.45449  | 4.88508E-06 | 0.006125495 |
| 1253.959976 | 208.128384 | 4.69717E-06 | 0.00589006  |
| 1253.999976 | 192.665406 | 4.34819E-06 | 0.00545263  |

|             |            |             |             |
|-------------|------------|-------------|-------------|
| 1254.039976 | 188.505131 | 4.2543E-06  | 0.00533506  |
| 1254.079976 | 213.987967 | 4.82941E-06 | 0.006056467 |
| 1254.119976 | 268.074403 | 6.05007E-06 | 0.007587508 |
| 1254.159976 | 296.927579 | 6.70124E-06 | 0.008404429 |
| 1254.199976 | 307.397287 | 6.93753E-06 | 0.008701048 |
| 1254.239976 | 330.345559 | 7.45544E-06 | 0.00935091  |
| 1254.279976 | 332.162753 | 7.49645E-06 | 0.009402648 |
| 1254.319976 | 300.561923 | 6.78326E-06 | 0.008508383 |
| 1254.359976 | 276.395436 | 6.23786E-06 | 0.007824522 |
| 1254.399976 | 265.223675 | 5.98573E-06 | 0.007508498 |
| 1254.439976 | 243.8304   | 5.50291E-06 | 0.006903073 |
| 1254.479976 | 229.819543 | 5.18671E-06 | 0.00650662  |
| 1254.519976 | 219.088391 | 4.94452E-06 | 0.006202999 |
| 1254.559976 | 204.249736 | 4.60963E-06 | 0.00578306  |
| 1254.599976 | 194.84789  | 4.39745E-06 | 0.005517035 |
| 1254.639976 | 208.041278 | 4.6952E-06  | 0.005890788 |
| 1254.679976 | 216.41079  | 4.88409E-06 | 0.00612797  |
| 1254.719976 | 204.954838 | 4.62555E-06 | 0.005803764 |
| 1254.759976 | 197.67831  | 4.46132E-06 | 0.005597891 |
| 1254.799976 | 183.690384 | 4.14564E-06 | 0.005201944 |
| 1254.839976 | 189.009596 | 4.26568E-06 | 0.00535275  |
| 1254.879976 | 212.218706 | 4.78948E-06 | 0.006010223 |
| 1254.919976 | 244.045713 | 5.50777E-06 | 0.006911813 |
| 1254.959976 | 254.580937 | 5.74554E-06 | 0.007210419 |
| 1254.999976 | 223.472392 | 5.04346E-06 | 0.006329543 |
| 1255.039976 | 218.00509  | 4.92007E-06 | 0.006174886 |
| 1255.079976 | 230.388665 | 5.19955E-06 | 0.006525853 |
| 1255.119976 | 261.424057 | 5.89998E-06 | 0.007405179 |
| 1255.159976 | 304.099219 | 6.8631E-06  | 0.008614283 |
| 1255.199976 | 333.903173 | 7.53573E-06 | 0.009458848 |
| 1255.239976 | 334.464757 | 7.5484E-06  | 0.009475058 |
| 1255.279976 | 323.879903 | 7.30952E-06 | 0.009175492 |
| 1255.319976 | 338.061229 | 7.62957E-06 | 0.009577553 |
| 1255.359976 | 325.435548 | 7.34463E-06 | 0.009220151 |
| 1255.399976 | 277.643052 | 6.26602E-06 | 0.007866358 |
| 1255.439976 | 240.879639 | 5.43632E-06 | 0.006824971 |
| 1255.479976 | 215.001882 | 4.85229E-06 | 0.006091957 |
| 1255.519976 | 187.190378 | 4.22463E-06 | 0.005304102 |
| 1255.559976 | 176.105268 | 3.97445E-06 | 0.004990161 |
| 1255.599976 | 178.253987 | 4.02294E-06 | 0.005051209 |
| 1255.639976 | 168.397108 | 3.80049E-06 | 0.004772045 |
| 1255.679976 | 180.812249 | 4.08068E-06 | 0.005124029 |
| 1255.719976 | 201.287451 | 4.54278E-06 | 0.005704456 |
| 1255.759976 | 193.921021 | 4.37653E-06 | 0.005495868 |
| 1255.799976 | 204.422763 | 4.61354E-06 | 0.00579368  |
| 1255.839976 | 221.786741 | 5.00542E-06 | 0.006286004 |

|             |            |             |             |
|-------------|------------|-------------|-------------|
| 1255.879976 | 205.561736 | 4.63924E-06 | 0.005826331 |
| 1255.919976 | 190.310904 | 4.29505E-06 | 0.005394242 |
| 1255.959976 | 218.257747 | 4.92577E-06 | 0.006186574 |
| 1255.999976 | 254.447364 | 5.74252E-06 | 0.007212608 |
| 1256.039976 | 264.34192  | 5.96583E-06 | 0.00749332  |
| 1256.079976 | 264.815542 | 5.97652E-06 | 0.007506984 |
| 1256.119976 | 261.437728 | 5.90029E-06 | 0.007411466 |
| 1256.159976 | 280.59839  | 6.33271E-06 | 0.007954903 |
| 1256.199976 | 313.37711  | 7.07248E-06 | 0.008884455 |
| 1256.239976 | 329.001401 | 7.4251E-06  | 0.009327712 |
| 1256.279976 | 327.040572 | 7.38085E-06 | 0.009272414 |
| 1256.319976 | 298.389557 | 6.73424E-06 | 0.008460356 |
| 1256.359976 | 288.944868 | 6.52108E-06 | 0.008192828 |
| 1256.399976 | 276.796211 | 6.2469E-06  | 0.007848611 |
| 1256.439976 | 253.108195 | 5.7123E-06  | 0.007177161 |
| 1256.479976 | 244.434355 | 5.51654E-06 | 0.006931426 |
| 1256.519976 | 202.501849 | 4.57018E-06 | 0.005742528 |
| 1256.559976 | 179.07317  | 4.04143E-06 | 0.005078302 |
| 1256.599976 | 184.744083 | 4.16942E-06 | 0.005239289 |
| 1256.639976 | 186.267049 | 4.20379E-06 | 0.005282648 |
| 1256.679976 | 181.639753 | 4.09936E-06 | 0.005151579 |
| 1256.719976 | 184.20692  | 4.15729E-06 | 0.005224554 |
| 1256.759976 | 193.807327 | 4.37396E-06 | 0.00549702  |
| 1256.799976 | 195.683727 | 4.41631E-06 | 0.005550417 |
| 1256.839976 | 194.362278 | 4.38649E-06 | 0.005513111 |
| 1256.879976 | 194.791591 | 4.39617E-06 | 0.005525464 |
| 1256.919976 | 197.750051 | 4.46294E-06 | 0.005609562 |
| 1256.959976 | 210.795962 | 4.75737E-06 | 0.005979825 |
| 1256.999976 | 257.498003 | 5.81137E-06 | 0.007304894 |
| 1257.039976 | 295.709233 | 6.67375E-06 | 0.008389165 |
| 1257.079976 | 297.333957 | 6.71041E-06 | 0.008435526 |
| 1257.119976 | 303.465363 | 6.84879E-06 | 0.008609751 |
| 1257.159976 | 321.089252 | 7.24654E-06 | 0.009110057 |
| 1257.199976 | 343.36706  | 7.74932E-06 | 0.00974244  |
| 1257.239976 | 355.082576 | 8.01372E-06 | 0.010075168 |
| 1257.279976 | 351.888474 | 7.94163E-06 | 0.009984856 |
| 1257.319976 | 334.624484 | 7.55201E-06 | 0.009495291 |
| 1257.359976 | 308.683258 | 6.96655E-06 | 0.008759463 |
| 1257.399976 | 292.673995 | 6.60524E-06 | 0.008305434 |
| 1257.439976 | 282.610157 | 6.37812E-06 | 0.0080201   |
| 1257.479976 | 253.578757 | 5.72292E-06 | 0.007196456 |
| 1257.519976 | 214.556435 | 4.84224E-06 | 0.006089213 |
| 1257.559976 | 173.510482 | 3.91589E-06 | 0.004924466 |
| 1257.599976 | 139.403898 | 3.14615E-06 | 0.0039566   |
| 1257.639976 | 144.746737 | 3.26673E-06 | 0.004108373 |
| 1257.679976 | 159.445922 | 3.59847E-06 | 0.004525727 |

|             |            |             |             |
|-------------|------------|-------------|-------------|
| 1257.719976 | 181.8083   | 4.10316E-06 | 0.005160626 |
| 1257.759976 | 203.214397 | 4.58627E-06 | 0.005768422 |
| 1257.799976 | 242.721363 | 5.47788E-06 | 0.006890081 |
| 1257.839976 | 249.55045  | 5.63201E-06 | 0.007084162 |
| 1257.879976 | 201.853897 | 4.55556E-06 | 0.005730349 |
| 1257.919976 | 169.02747  | 3.81471E-06 | 0.004798606 |
| 1257.959976 | 186.996896 | 4.22026E-06 | 0.005308918 |
| 1257.999976 | 228.861097 | 5.16508E-06 | 0.006497666 |
| 1258.039976 | 237.253017 | 5.35447E-06 | 0.006736137 |
| 1258.079976 | 223.266805 | 5.03882E-06 | 0.00633924  |
| 1258.119976 | 226.040316 | 5.10142E-06 | 0.006418192 |
| 1258.159976 | 232.595494 | 5.24936E-06 | 0.00660453  |
| 1258.199976 | 266.807044 | 6.02146E-06 | 0.007576205 |
| 1258.239976 | 315.226798 | 7.11423E-06 | 0.008951408 |
| 1258.279976 | 313.988068 | 7.08627E-06 | 0.008916516 |
| 1258.319976 | 308.030663 | 6.95182E-06 | 0.008747618 |
| 1258.359976 | 290.455206 | 6.55517E-06 | 0.008248763 |
| 1258.399976 | 249.404188 | 5.62871E-06 | 0.007083162 |
| 1258.439976 | 223.278304 | 5.03908E-06 | 0.00634138  |
| 1258.479976 | 201.962769 | 4.55802E-06 | 0.005736175 |
| 1258.519976 | 184.542891 | 4.16488E-06 | 0.00524158  |
| 1258.559976 | 171.734616 | 3.87581E-06 | 0.004877941 |
| 1258.599976 | 165.581348 | 3.73694E-06 | 0.004703313 |
| 1258.639976 | 162.972993 | 3.67807E-06 | 0.00462937  |
| 1258.679976 | 170.908601 | 3.85717E-06 | 0.004854941 |
| 1258.719976 | 187.09659  | 4.22251E-06 | 0.005314957 |
| 1258.759976 | 210.678144 | 4.75471E-06 | 0.005985041 |
| 1258.799976 | 226.530682 | 5.11248E-06 | 0.006435592 |
| 1258.839976 | 220.954806 | 4.98664E-06 | 0.006277385 |
| 1258.879976 | 223.948753 | 5.05421E-06 | 0.006362646 |
| 1258.919976 | 239.487899 | 5.40491E-06 | 0.006804347 |
| 1258.959976 | 241.589565 | 5.45234E-06 | 0.006864278 |
| 1258.999976 | 239.349059 | 5.40177E-06 | 0.006800834 |
| 1259.039976 | 239.03204  | 5.39462E-06 | 0.006792042 |
| 1259.079976 | 241.584997 | 5.45224E-06 | 0.006864802 |
| 1259.119976 | 267.171252 | 6.02968E-06 | 0.007592094 |
| 1259.159976 | 285.862457 | 6.45152E-06 | 0.008123493 |
| 1259.199976 | 331.678874 | 7.48553E-06 | 0.009425779 |
| 1259.239976 | 352.280923 | 7.95049E-06 | 0.010011575 |
| 1259.279976 | 354.824734 | 8.0079E-06  | 0.010084188 |
| 1259.319976 | 330.831671 | 7.46641E-06 | 0.009402599 |
| 1259.359976 | 300.142539 | 6.7738E-06  | 0.008530651 |
| 1259.399976 | 277.351356 | 6.25943E-06 | 0.007883131 |
| 1259.439976 | 247.668668 | 5.58954E-06 | 0.007039686 |
| 1259.479976 | 202.814165 | 4.57723E-06 | 0.005764934 |
| 1259.519976 | 176.75359  | 3.98908E-06 | 0.005024329 |

|             |            |             |             |
|-------------|------------|-------------|-------------|
| 1259.559976 | 183.645676 | 4.14463E-06 | 0.005220406 |
| 1259.599976 | 185.739149 | 4.19187E-06 | 0.005280084 |
| 1259.639976 | 176.943001 | 3.99336E-06 | 0.005030192 |
| 1259.679976 | 188.732648 | 4.25943E-06 | 0.005365522 |
| 1259.719976 | 194.175856 | 4.38228E-06 | 0.005520444 |
| 1259.759976 | 193.042447 | 4.3567E-06  | 0.005488395 |
| 1259.799976 | 188.635304 | 4.25724E-06 | 0.005363266 |
| 1259.839976 | 183.69438  | 4.14573E-06 | 0.005222952 |
| 1259.879976 | 190.49976  | 4.29931E-06 | 0.00541662  |
| 1259.919976 | 194.272926 | 4.38447E-06 | 0.005524081 |
| 1259.959976 | 176.047735 | 3.97315E-06 | 0.005006013 |
| 1259.999976 | 183.701181 | 4.14588E-06 | 0.005223808 |
| 1260.039976 | 222.510237 | 5.02175E-06 | 0.006327601 |
| 1260.079976 | 253.981799 | 5.73202E-06 | 0.007222798 |
| 1260.119976 | 268.578968 | 6.06145E-06 | 0.007638158 |
| 1260.159976 | 279.438739 | 6.30654E-06 | 0.007947253 |
| 1260.199976 | 308.48848  | 6.96216E-06 | 0.008773708 |
| 1260.239976 | 321.016344 | 7.24489E-06 | 0.009130302 |
| 1260.279976 | 294.056736 | 6.63645E-06 | 0.008363786 |
| 1260.319976 | 259.249454 | 5.8509E-06  | 0.007374005 |
| 1260.359976 | 244.268518 | 5.5128E-06  | 0.006948113 |
| 1260.399976 | 247.251933 | 5.58013E-06 | 0.007033198 |
| 1260.439976 | 224.104401 | 5.05772E-06 | 0.006374958 |
| 1260.479976 | 192.539634 | 4.34535E-06 | 0.005477228 |
| 1260.519976 | 185.168607 | 4.179E-06   | 0.00526771  |
| 1260.559976 | 189.560279 | 4.27811E-06 | 0.005392816 |
| 1260.599976 | 192.17012  | 4.33701E-06 | 0.005467237 |
| 1260.639976 | 197.775798 | 4.46352E-06 | 0.005626897 |
| 1260.679976 | 203.676373 | 4.59669E-06 | 0.005794958 |
| 1260.719976 | 218.301481 | 4.92676E-06 | 0.006211265 |
| 1260.759976 | 230.611159 | 5.20457E-06 | 0.006561717 |
| 1260.799976 | 233.882657 | 5.27841E-06 | 0.006655014 |
| 1260.839976 | 210.686275 | 4.7549E-06  | 0.005995163 |
| 1260.879976 | 200.842762 | 4.53274E-06 | 0.005715243 |
| 1260.919976 | 210.840651 | 4.75838E-06 | 0.005999936 |
| 1260.959976 | 219.823367 | 4.96111E-06 | 0.006255758 |
| 1260.999976 | 231.070227 | 5.21493E-06 | 0.006576031 |
| 1261.039976 | 245.303932 | 5.53617E-06 | 0.006981329 |
| 1261.079976 | 261.501874 | 5.90173E-06 | 0.007442557 |
| 1261.119976 | 284.202782 | 6.41406E-06 | 0.0080889   |
| 1261.159976 | 315.506346 | 7.12054E-06 | 0.008980138 |
| 1261.199976 | 343.408876 | 7.75026E-06 | 0.009774628 |
| 1261.239976 | 351.634785 | 7.93591E-06 | 0.010009084 |
| 1261.279976 | 335.695794 | 7.57619E-06 | 0.009555692 |
| 1261.319976 | 315.723143 | 7.12543E-06 | 0.008987449 |
| 1261.359976 | 315.160695 | 7.11274E-06 | 0.008971723 |

|             |            |             |             |
|-------------|------------|-------------|-------------|
| 1261.399976 | 310.134429 | 6.9993E-06  | 0.008828919 |
| 1261.439976 | 262.719126 | 5.9292E-06  | 0.007479336 |
| 1261.479976 | 235.391476 | 5.31246E-06 | 0.006701559 |
| 1261.519976 | 227.053287 | 5.12428E-06 | 0.006464377 |
| 1261.559976 | 223.146982 | 5.03612E-06 | 0.006353363 |
| 1261.599976 | 222.892815 | 5.03038E-06 | 0.006346328 |
| 1261.639976 | 220.107259 | 4.96751E-06 | 0.006267215 |
| 1261.679976 | 219.980944 | 4.96466E-06 | 0.006263817 |
| 1261.719976 | 220.735094 | 4.98168E-06 | 0.00628549  |
| 1261.759976 | 224.358403 | 5.06346E-06 | 0.006388867 |
| 1261.799976 | 218.849244 | 4.93912E-06 | 0.006232185 |
| 1261.839976 | 188.923061 | 4.26373E-06 | 0.005380145 |
| 1261.879976 | 189.505915 | 4.27688E-06 | 0.005396915 |
| 1261.919976 | 189.721972 | 4.28176E-06 | 0.005403239 |
| 1261.959976 | 178.98328  | 4.0394E-06  | 0.005097565 |
| 1261.999976 | 206.754161 | 4.66615E-06 | 0.005888686 |
| 1262.039976 | 220.44036  | 4.97503E-06 | 0.006278689 |
| 1262.079976 | 230.738242 | 5.20744E-06 | 0.006572207 |
| 1262.119976 | 254.018113 | 5.73283E-06 | 0.007235526 |
| 1262.159976 | 278.768813 | 6.29142E-06 | 0.007940783 |
| 1262.199976 | 297.624504 | 6.71697E-06 | 0.00847816  |
| 1262.239976 | 323.005685 | 7.28979E-06 | 0.009201462 |
| 1262.279976 | 346.991029 | 7.8311E-06  | 0.009885046 |
| 1262.319976 | 347.774968 | 7.8488E-06  | 0.009907693 |
| 1262.359976 | 299.22477  | 6.75309E-06 | 0.008524826 |
| 1262.399976 | 243.332608 | 5.49168E-06 | 0.006932694 |
| 1262.439976 | 238.671355 | 5.38648E-06 | 0.006800108 |
| 1262.479976 | 236.978758 | 5.34828E-06 | 0.006752097 |
| 1262.519976 | 208.832103 | 4.71305E-06 | 0.005950319 |
| 1262.559976 | 189.667567 | 4.28053E-06 | 0.005404429 |
| 1262.599976 | 208.323677 | 4.70158E-06 | 0.005936209 |
| 1262.639976 | 212.178059 | 4.78856E-06 | 0.006046231 |
| 1262.679976 | 178.974176 | 4.0392E-06  | 0.005100214 |
| 1262.719976 | 175.546304 | 3.96184E-06 | 0.005002689 |
| 1262.759976 | 186.030404 | 4.19845E-06 | 0.005301631 |
| 1262.799976 | 200.016665 | 4.5141E-06  | 0.005700402 |
| 1262.839976 | 215.859982 | 4.87166E-06 | 0.006152126 |
| 1262.879976 | 210.156147 | 4.74293E-06 | 0.005989753 |
| 1262.919976 | 223.843648 | 5.05184E-06 | 0.006380069 |
| 1262.959976 | 248.048165 | 5.5981E-06  | 0.007070178 |
| 1262.999976 | 264.330954 | 5.96558E-06 | 0.007534529 |
| 1263.039976 | 276.577861 | 6.24198E-06 | 0.007883867 |
| 1263.079976 | 300.719242 | 6.78681E-06 | 0.008572289 |
| 1263.119976 | 330.0064   | 7.44778E-06 | 0.009407446 |
| 1263.159976 | 368.978851 | 8.32734E-06 | 0.010518761 |
| 1263.199976 | 420.45892  | 9.48917E-06 | 0.011986722 |

|             |            |             |             |
|-------------|------------|-------------|-------------|
| 1263.239976 | 417.604097 | 9.42474E-06 | 0.011905712 |
| 1263.279976 | 385.350441 | 8.69682E-06 | 0.010986522 |
| 1263.319976 | 339.584832 | 7.66396E-06 | 0.00968203  |
| 1263.359976 | 299.506843 | 6.75945E-06 | 0.008539621 |
| 1263.399976 | 278.922542 | 6.29489E-06 | 0.007952968 |
| 1263.439976 | 251.914434 | 5.68536E-06 | 0.007183108 |
| 1263.479976 | 246.063817 | 5.55332E-06 | 0.007016506 |
| 1263.519976 | 223.901202 | 5.05314E-06 | 0.006384741 |
| 1263.559976 | 190.854824 | 4.30733E-06 | 0.005442567 |
| 1263.599976 | 179.425011 | 4.04937E-06 | 0.005116787 |
| 1263.639976 | 198.574277 | 4.48154E-06 | 0.005663059 |
| 1263.679976 | 212.851205 | 4.80376E-06 | 0.006070409 |
| 1263.719976 | 201.438371 | 4.54618E-06 | 0.005745103 |
| 1263.759976 | 197.146239 | 4.44932E-06 | 0.005622867 |
| 1263.799976 | 222.26707  | 5.01626E-06 | 0.006339547 |
| 1263.839976 | 244.187989 | 5.51098E-06 | 0.006965    |
| 1263.879976 | 235.725966 | 5.32001E-06 | 0.00672385  |
| 1263.919976 | 226.292973 | 5.10712E-06 | 0.006454987 |
| 1263.959976 | 230.666518 | 5.20582E-06 | 0.006579951 |
| 1263.999976 | 236.500531 | 5.33749E-06 | 0.006746584 |
| 1264.039976 | 227.887507 | 5.1431E-06  | 0.006501089 |
| 1264.079976 | 237.551555 | 5.36121E-06 | 0.006776995 |
| 1264.119976 | 284.468591 | 6.42006E-06 | 0.008115726 |
| 1264.159976 | 318.220418 | 7.18179E-06 | 0.009078933 |
| 1264.199976 | 351.77671  | 7.93911E-06 | 0.010036623 |
| 1264.239976 | 369.635872 | 8.34217E-06 | 0.010546501 |
| 1264.279976 | 346.034722 | 7.80952E-06 | 0.009873422 |
| 1264.319976 | 329.083737 | 7.42696E-06 | 0.009390056 |
| 1264.359976 | 324.246923 | 7.3178E-06  | 0.009252335 |
| 1264.399976 | 275.810974 | 6.22467E-06 | 0.007870472 |
| 1264.439976 | 235.001217 | 5.30365E-06 | 0.006706147 |
| 1264.479976 | 214.751268 | 4.84664E-06 | 0.006128475 |
| 1264.519976 | 196.917075 | 4.44414E-06 | 0.005619709 |
| 1264.559976 | 186.281856 | 4.20412E-06 | 0.005316364 |
| 1264.599976 | 186.172576 | 4.20166E-06 | 0.005313414 |
| 1264.639976 | 197.644049 | 4.46055E-06 | 0.005640991 |
| 1264.679976 | 216.948907 | 4.89623E-06 | 0.00619217  |
| 1264.719976 | 220.490319 | 4.97616E-06 | 0.006293448 |
| 1264.759976 | 211.845284 | 4.78105E-06 | 0.006046884 |
| 1264.799976 | 233.120429 | 5.2612E-06  | 0.00665437  |
| 1264.839976 | 254.177317 | 5.73643E-06 | 0.007255663 |
| 1264.879976 | 266.141626 | 6.00645E-06 | 0.007597433 |
| 1264.919976 | 266.614347 | 6.01711E-06 | 0.007611168 |
| 1264.959976 | 241.40077  | 5.44808E-06 | 0.006891602 |
| 1264.999976 | 226.503729 | 5.11187E-06 | 0.00646652  |
| 1265.039976 | 253.252933 | 5.71557E-06 | 0.007230419 |

|             |            |             |             |
|-------------|------------|-------------|-------------|
| 1265.079976 | 295.825674 | 6.67637E-06 | 0.008446146 |
| 1265.119976 | 321.816531 | 7.26295E-06 | 0.009188504 |
| 1265.159976 | 325.005831 | 7.33493E-06 | 0.009279858 |
| 1265.199976 | 332.174668 | 7.49672E-06 | 0.009484849 |
| 1265.239976 | 334.721397 | 7.5542E-06  | 0.00955787  |
| 1265.279976 | 326.72155  | 7.37365E-06 | 0.009329732 |
| 1265.319976 | 326.637198 | 7.37175E-06 | 0.009327618 |
| 1265.359976 | 345.048121 | 7.78726E-06 | 0.009853681 |
| 1265.399976 | 303.952821 | 6.85979E-06 | 0.00868038  |
| 1265.439976 | 214.893049 | 4.84984E-06 | 0.006137177 |
| 1265.479976 | 166.057042 | 3.74768E-06 | 0.004742609 |
| 1265.519976 | 160.482899 | 3.62188E-06 | 0.004583556 |
| 1265.559976 | 161.878921 | 3.65338E-06 | 0.004623574 |
| 1265.599976 | 168.176297 | 3.7955E-06  | 0.004803591 |
| 1265.639976 | 181.051043 | 4.08607E-06 | 0.005171493 |
| 1265.679976 | 183.097599 | 4.13226E-06 | 0.005230116 |
| 1265.719976 | 187.198702 | 4.22481E-06 | 0.005347431 |
| 1265.759976 | 191.917827 | 4.33132E-06 | 0.005482409 |
| 1265.799976 | 214.091183 | 4.83174E-06 | 0.006116016 |
| 1265.839976 | 221.694786 | 5.00334E-06 | 0.006333431 |
| 1265.879976 | 207.899835 | 4.69201E-06 | 0.005939521 |
| 1265.919976 | 201.351739 | 4.54423E-06 | 0.005752629 |
| 1265.959976 | 218.947038 | 4.94133E-06 | 0.006255526 |
| 1265.999976 | 240.734662 | 5.43305E-06 | 0.006878236 |
| 1266.039976 | 240.167118 | 5.42024E-06 | 0.006862237 |
| 1266.079976 | 246.818264 | 5.57034E-06 | 0.007052502 |
| 1266.119976 | 280.035147 | 6.32E-06    | 0.008001882 |
| 1266.159976 | 292.483219 | 6.60094E-06 | 0.008357845 |
| 1266.199976 | 282.667285 | 6.37941E-06 | 0.008077605 |
| 1266.239976 | 311.453391 | 7.02907E-06 | 0.008900488 |
| 1266.279976 | 352.309969 | 7.95115E-06 | 0.010068376 |
| 1266.319976 | 330.795045 | 7.46558E-06 | 0.009453817 |
| 1266.359976 | 297.344362 | 6.71065E-06 | 0.008498096 |
| 1266.399976 | 273.81423  | 6.17961E-06 | 0.007825853 |
| 1266.439976 | 249.1731   | 5.62349E-06 | 0.007121812 |
| 1266.479976 | 210.040583 | 4.74032E-06 | 0.006003525 |
| 1266.519976 | 181.413758 | 4.09426E-06 | 0.005185457 |
| 1266.559976 | 173.903299 | 3.92476E-06 | 0.004970938 |
| 1266.599976 | 176.119584 | 3.97477E-06 | 0.005034448 |
| 1266.639976 | 166.342267 | 3.75411E-06 | 0.00475511  |
| 1266.679976 | 172.452103 | 3.892E-06   | 0.004929923 |
| 1266.719976 | 189.483349 | 4.27638E-06 | 0.00541697  |
| 1266.759976 | 211.866764 | 4.78154E-06 | 0.006057061 |
| 1266.799976 | 224.478184 | 5.06616E-06 | 0.006417811 |
| 1266.839976 | 216.998908 | 4.89736E-06 | 0.006204175 |
| 1266.879976 | 207.498717 | 4.68296E-06 | 0.005932744 |



|             |            |             |             |
|-------------|------------|-------------|-------------|
| 1266.919976 | 222.685683 | 5.02571E-06 | 0.006367167 |
| 1266.959976 | 236.800521 | 5.34426E-06 | 0.006770961 |
| 1266.999976 | 236.907856 | 5.34668E-06 | 0.006774244 |
| 1267.039976 | 226.75796  | 5.11761E-06 | 0.006484218 |
| 1267.079976 | 230.639449 | 5.20521E-06 | 0.006595419 |
| 1267.119976 | 263.700438 | 5.95135E-06 | 0.007541076 |
| 1267.159976 | 309.79962  | 6.99175E-06 | 0.008859661 |
| 1267.199976 | 321.637536 | 7.25891E-06 | 0.009198492 |
| 1267.239976 | 326.777269 | 7.37491E-06 | 0.009345778 |
| 1267.279976 | 344.787715 | 7.78138E-06 | 0.009861185 |
| 1267.319976 | 358.180895 | 8.08364E-06 | 0.010244563 |
| 1267.359976 | 342.891792 | 7.73859E-06 | 0.009807579 |
| 1267.399976 | 313.037062 | 7.06481E-06 | 0.008953941 |
| 1267.439976 | 288.135459 | 6.50282E-06 | 0.008241929 |
| 1267.479976 | 241.521862 | 5.45081E-06 | 0.006908795 |
| 1267.519976 | 204.915121 | 4.62465E-06 | 0.005861835 |
| 1267.559976 | 197.579465 | 4.45909E-06 | 0.005652168 |
| 1267.599976 | 186.706611 | 4.21371E-06 | 0.005341296 |
| 1267.639976 | 166.608902 | 3.76013E-06 | 0.004766492 |
| 1267.679976 | 177.122212 | 3.9974E-06  | 0.005067426 |
| 1267.719976 | 179.119033 | 4.04247E-06 | 0.005124716 |
| 1267.759976 | 175.223799 | 3.95456E-06 | 0.005013429 |
| 1267.799976 | 184.40403  | 4.16174E-06 | 0.005276257 |
| 1267.839976 | 193.002724 | 4.3558E-06  | 0.005522461 |
| 1267.879976 | 197.039546 | 4.44691E-06 | 0.005638146 |
| 1267.919976 | 191.505976 | 4.32202E-06 | 0.005479979 |
| 1267.959976 | 192.328611 | 4.34059E-06 | 0.005503693 |
| 1267.999976 | 230.384989 | 5.19947E-06 | 0.006592926 |
| 1268.039976 | 248.104717 | 5.59938E-06 | 0.007100235 |
| 1268.079976 | 234.624002 | 5.29514E-06 | 0.006714657 |
| 1268.119976 | 250.277409 | 5.64841E-06 | 0.007162865 |
| 1268.159976 | 291.323849 | 6.57477E-06 | 0.008337865 |
| 1268.199976 | 323.493486 | 7.3008E-06  | 0.009258871 |
| 1268.239976 | 315.125951 | 7.11195E-06 | 0.009019664 |
| 1268.279976 | 326.352723 | 7.36533E-06 | 0.009341296 |
| 1268.319976 | 319.755206 | 7.21643E-06 | 0.009152742 |
| 1268.359976 | 288.559545 | 6.51239E-06 | 0.008260051 |
| 1268.399976 | 249.163329 | 5.62327E-06 | 0.007132555 |
| 1268.439976 | 225.833363 | 5.09674E-06 | 0.006464914 |
| 1268.479976 | 218.164415 | 4.92367E-06 | 0.006245573 |
| 1268.519976 | 209.781743 | 4.73448E-06 | 0.006005785 |
| 1268.559976 | 192.947158 | 4.35455E-06 | 0.005524006 |
| 1268.599976 | 196.690191 | 4.43902E-06 | 0.005631345 |
| 1268.639976 | 203.402982 | 4.59052E-06 | 0.00582372  |
| 1268.679976 | 198.698803 | 4.48436E-06 | 0.005689212 |
| 1268.719976 | 214.692781 | 4.84532E-06 | 0.00614735  |

|             |            |             |             |
|-------------|------------|-------------|-------------|
| 1268.759976 | 223.062825 | 5.03422E-06 | 0.006387213 |
| 1268.799976 | 217.511665 | 4.90894E-06 | 0.006228457 |
| 1268.839976 | 215.177468 | 4.85626E-06 | 0.006161811 |
| 1268.879976 | 215.94454  | 4.87357E-06 | 0.006183972 |
| 1268.919976 | 216.225074 | 4.8799E-06  | 0.006192201 |
| 1268.959976 | 215.547914 | 4.86462E-06 | 0.006173003 |
| 1268.999976 | 227.014663 | 5.1234E-06  | 0.0065016   |
| 1269.039976 | 224.113781 | 5.05794E-06 | 0.006418723 |
| 1269.079976 | 244.31536  | 5.51386E-06 | 0.006997526 |
| 1269.119976 | 279.724618 | 6.313E-06   | 0.008011948 |
| 1269.159976 | 297.177416 | 6.70688E-06 | 0.008512104 |
| 1269.199976 | 307.311593 | 6.93559E-06 | 0.008802657 |
| 1269.239976 | 330.012287 | 7.44792E-06 | 0.009453195 |
| 1269.279976 | 330.877775 | 7.46745E-06 | 0.009478285 |
| 1269.319976 | 309.76103  | 6.99087E-06 | 0.008873657 |
| 1269.359976 | 275.740444 | 6.22308E-06 | 0.007899326 |
| 1269.399976 | 248.145245 | 5.60029E-06 | 0.007109011 |
| 1269.439976 | 232.495487 | 5.2471E-06  | 0.006660878 |
| 1269.479976 | 230.574796 | 5.20375E-06 | 0.006606059 |
| 1269.519976 | 219.296328 | 4.94921E-06 | 0.006283124 |
| 1269.559976 | 195.031909 | 4.4016E-06  | 0.005588093 |
| 1269.599976 | 175.095045 | 3.95165E-06 | 0.005017016 |
| 1269.639976 | 170.960787 | 3.85835E-06 | 0.004898711 |
| 1269.679976 | 168.876711 | 3.81131E-06 | 0.004839147 |
| 1269.719976 | 181.157593 | 4.08847E-06 | 0.005191218 |
| 1269.759976 | 192.535336 | 4.34525E-06 | 0.00551743  |
| 1269.799976 | 188.82927  | 4.26161E-06 | 0.005411397 |
| 1269.839976 | 174.584159 | 3.94012E-06 | 0.005003324 |
| 1269.879976 | 159.790211 | 3.60624E-06 | 0.004579495 |
| 1269.919976 | 160.222182 | 3.61599E-06 | 0.00459202  |
| 1269.959976 | 173.341083 | 3.91207E-06 | 0.004968168 |
| 1269.999976 | 192.116985 | 4.33581E-06 | 0.005506482 |
| 1270.039976 | 216.950219 | 4.89626E-06 | 0.006218451 |
| 1270.079976 | 231.90522  | 5.23378E-06 | 0.006647316 |
| 1270.119976 | 238.162437 | 5.37499E-06 | 0.006826888 |
| 1270.159976 | 263.659    | 5.95042E-06 | 0.007557981 |
| 1270.199976 | 297.27252  | 6.70903E-06 | 0.008521806 |
| 1270.239976 | 307.051247 | 6.92972E-06 | 0.008802406 |
| 1270.279976 | 294.953753 | 6.6567E-06  | 0.008455867 |
| 1270.319976 | 269.294507 | 6.0776E-06  | 0.007720499 |
| 1270.359976 | 269.922762 | 6.09178E-06 | 0.007738754 |
| 1270.399976 | 276.297734 | 6.23566E-06 | 0.007921776 |
| 1270.439976 | 270.246415 | 6.09909E-06 | 0.007748522 |
| 1270.479976 | 254.201078 | 5.73696E-06 | 0.007288698 |
| 1270.519976 | 224.073982 | 5.05704E-06 | 0.006425067 |
| 1270.559976 | 202.037852 | 4.55971E-06 | 0.005793389 |

|             |            |             |             |
|-------------|------------|-------------|-------------|
| 1270.599976 | 179.768106 | 4.05712E-06 | 0.005154971 |
| 1270.639976 | 194.833831 | 4.39713E-06 | 0.005587167 |
| 1270.679976 | 214.937419 | 4.85084E-06 | 0.006163863 |
| 1270.719976 | 201.006184 | 4.53643E-06 | 0.005764532 |
| 1270.759976 | 184.077711 | 4.15438E-06 | 0.005279217 |
| 1270.799976 | 203.63385  | 4.59573E-06 | 0.005840257 |
| 1270.839976 | 226.143855 | 5.10375E-06 | 0.006486052 |
| 1270.879976 | 223.731366 | 5.04931E-06 | 0.006417061 |
| 1270.919976 | 222.563659 | 5.02295E-06 | 0.00638377  |
| 1270.959976 | 240.033355 | 5.41722E-06 | 0.006885068 |
| 1270.999976 | 228.671619 | 5.1608E-06  | 0.006559377 |
| 1271.039976 | 232.203601 | 5.24051E-06 | 0.0066609   |
| 1271.079976 | 277.120336 | 6.25422E-06 | 0.007949614 |
| 1271.119976 | 314.406607 | 7.09572E-06 | 0.00901951  |
| 1271.159976 | 342.575881 | 7.73146E-06 | 0.009827923 |
| 1271.199976 | 372.759567 | 8.41266E-06 | 0.010694179 |
| 1271.239976 | 393.518154 | 8.88116E-06 | 0.011290081 |
| 1271.279976 | 396.278445 | 8.94345E-06 | 0.011369632 |
| 1271.319976 | 405.918199 | 9.16101E-06 | 0.011646573 |
| 1271.359976 | 381.176732 | 8.60263E-06 | 0.010937037 |
| 1271.399976 | 339.290956 | 7.65732E-06 | 0.009735522 |
| 1271.439976 | 278.48807  | 6.28509E-06 | 0.007991112 |
| 1271.479976 | 226.070002 | 5.10209E-06 | 0.006487199 |
| 1271.519976 | 215.383731 | 4.86091E-06 | 0.006180745 |
| 1271.559976 | 211.889274 | 4.78205E-06 | 0.006080658 |
| 1271.599976 | 194.755129 | 4.39535E-06 | 0.005589129 |
| 1271.639976 | 181.710359 | 4.10095E-06 | 0.005214932 |
| 1271.679976 | 171.137791 | 3.86234E-06 | 0.004911662 |
| 1271.719976 | 184.82975  | 4.17135E-06 | 0.005304789 |
| 1271.759976 | 200.65103  | 4.52841E-06 | 0.005759056 |
| 1271.799976 | 209.392165 | 4.72569E-06 | 0.006010132 |
| 1271.839976 | 221.622545 | 5.00171E-06 | 0.006361377 |
| 1271.879976 | 210.80507  | 4.75758E-06 | 0.006051067 |
| 1271.919976 | 168.135273 | 3.79458E-06 | 0.004826401 |
| 1271.959976 | 160.591759 | 3.62433E-06 | 0.004610006 |
| 1271.999976 | 190.128272 | 4.29093E-06 | 0.005458063 |
| 1272.039976 | 214.2519   | 4.83537E-06 | 0.00615078  |
| 1272.079976 | 225.275038 | 5.08414E-06 | 0.006467438 |
| 1272.119976 | 246.557878 | 5.56447E-06 | 0.007078671 |
| 1272.159976 | 270.476536 | 6.10428E-06 | 0.007765619 |
| 1272.199976 | 286.415555 | 6.464E-06   | 0.008223501 |
| 1272.239976 | 299.199706 | 6.75252E-06 | 0.008590827 |
| 1272.279976 | 312.246048 | 7.04696E-06 | 0.008965704 |
| 1272.319976 | 329.005925 | 7.42521E-06 | 0.009447237 |
| 1272.359976 | 313.889419 | 7.08405E-06 | 0.009013458 |
| 1272.399976 | 279.68877  | 6.31219E-06 | 0.008031625 |

|             |            |             |             |
|-------------|------------|-------------|-------------|
| 1272.439976 | 240.864694 | 5.43598E-06 | 0.006916959 |
| 1272.479976 | 228.85941  | 5.16504E-06 | 0.006572408 |
| 1272.519976 | 213.461646 | 4.81753E-06 | 0.006130406 |
| 1272.559976 | 191.43847  | 4.3205E-06  | 0.005498095 |
| 1272.599976 | 171.130009 | 3.86217E-06 | 0.004914992 |
| 1272.639976 | 169.296348 | 3.82078E-06 | 0.004862481 |
| 1272.679976 | 181.500926 | 4.09622E-06 | 0.005213181 |
| 1272.719976 | 217.837236 | 4.91628E-06 | 0.006257052 |
| 1272.759976 | 229.022604 | 5.16872E-06 | 0.006578541 |
| 1272.799976 | 191.450083 | 4.32076E-06 | 0.005499465 |
| 1272.839976 | 190.748956 | 4.30494E-06 | 0.005479497 |
| 1272.879976 | 240.279094 | 5.42276E-06 | 0.006902528 |
| 1272.919976 | 244.674358 | 5.52196E-06 | 0.007029012 |
| 1272.959976 | 219.374705 | 4.95098E-06 | 0.006302401 |
| 1272.999976 | 212.072496 | 4.78618E-06 | 0.006092808 |
| 1273.039976 | 232.91361  | 5.25654E-06 | 0.00669178  |
| 1273.079976 | 261.023046 | 5.89093E-06 | 0.007499621 |
| 1273.119976 | 291.334196 | 6.57501E-06 | 0.008370773 |
| 1273.159976 | 331.331415 | 7.47769E-06 | 0.009520294 |
| 1273.199976 | 359.734154 | 8.1187E-06  | 0.010336727 |
| 1273.239976 | 365.514044 | 8.24914E-06 | 0.010503138 |
| 1273.279976 | 348.524869 | 7.86572E-06 | 0.010015265 |
| 1273.319976 | 335.266017 | 7.56649E-06 | 0.009634559 |
| 1273.359976 | 327.619386 | 7.39391E-06 | 0.009415113 |
| 1273.399976 | 318.113818 | 7.17939E-06 | 0.00914223  |
| 1273.439976 | 294.351828 | 6.64311E-06 | 0.008459603 |
| 1273.479976 | 268.492652 | 6.05951E-06 | 0.007716659 |
| 1273.519976 | 243.719169 | 5.5004E-06  | 0.007004872 |
| 1273.559976 | 228.13138  | 5.14861E-06 | 0.00655706  |
| 1273.599976 | 218.290775 | 4.92652E-06 | 0.006274414 |
| 1273.639976 | 200.301533 | 4.52053E-06 | 0.005757523 |
| 1273.679976 | 186.751702 | 4.21473E-06 | 0.005368212 |
| 1273.719976 | 184.227035 | 4.15775E-06 | 0.005295806 |
| 1273.759976 | 178.73727  | 4.03385E-06 | 0.005138158 |
| 1273.799976 | 195.508435 | 4.41235E-06 | 0.005620455 |
| 1273.839976 | 210.701363 | 4.75524E-06 | 0.00605741  |
| 1273.879976 | 194.844341 | 4.39737E-06 | 0.005601716 |
| 1273.919976 | 164.913838 | 3.72188E-06 | 0.004741372 |
| 1273.959976 | 165.890948 | 3.74393E-06 | 0.004769614 |
| 1273.999976 | 205.607602 | 4.64028E-06 | 0.005911713 |
| 1274.039976 | 224.853034 | 5.07462E-06 | 0.006465268 |
| 1274.079976 | 220.259932 | 4.97096E-06 | 0.0063334   |
| 1274.119976 | 232.046289 | 5.23696E-06 | 0.006672517 |
| 1274.159976 | 248.655037 | 5.6118E-06  | 0.007150328 |
| 1274.199976 | 288.155572 | 6.50327E-06 | 0.008286466 |
| 1274.239976 | 330.657596 | 7.46248E-06 | 0.009508992 |

|             |            |             |             |
|-------------|------------|-------------|-------------|
| 1274.279976 | 355.146626 | 8.01516E-06 | 0.010213564 |
| 1274.319976 | 349.513725 | 7.88804E-06 | 0.010051884 |
| 1274.359976 | 317.086413 | 7.1562E-06  | 0.009119573 |
| 1274.399976 | 261.92697  | 5.91133E-06 | 0.007533395 |
| 1274.439976 | 220.095429 | 4.96725E-06 | 0.006330458 |
| 1274.479976 | 185.120022 | 4.1779E-06  | 0.005324651 |
| 1274.519976 | 177.119927 | 3.99735E-06 | 0.005094702 |
| 1274.559976 | 172.8628   | 3.90127E-06 | 0.004972406 |
| 1274.599976 | 168.404532 | 3.80066E-06 | 0.004844316 |
| 1274.639976 | 173.911209 | 3.92493E-06 | 0.005002877 |
| 1274.679976 | 187.461357 | 4.23074E-06 | 0.005392842 |
| 1274.719976 | 197.038151 | 4.44688E-06 | 0.005668522 |
| 1274.759976 | 198.112685 | 4.47113E-06 | 0.005699614 |
| 1274.799976 | 196.548123 | 4.43582E-06 | 0.00565478  |
| 1274.839976 | 187.001157 | 4.22036E-06 | 0.005380278 |
| 1274.879976 | 181.655303 | 4.09971E-06 | 0.005226635 |
| 1274.919976 | 168.000354 | 3.79153E-06 | 0.004833902 |
| 1274.959976 | 172.383107 | 3.89045E-06 | 0.004960164 |
| 1274.999976 | 219.392295 | 4.95138E-06 | 0.006313007 |
| 1275.039976 | 260.044506 | 5.86884E-06 | 0.007483009 |
| 1275.079976 | 271.387894 | 6.12485E-06 | 0.007809669 |
| 1275.119976 | 273.50781  | 6.17269E-06 | 0.007870921 |
| 1275.159976 | 290.95074  | 6.56635E-06 | 0.00837315  |
| 1275.199976 | 290.136432 | 6.54798E-06 | 0.008349978 |
| 1275.239976 | 306.625996 | 6.92012E-06 | 0.008824816 |
| 1275.279976 | 342.152016 | 7.72189E-06 | 0.009847577 |
| 1275.319976 | 364.658553 | 8.22984E-06 | 0.010495674 |
| 1275.359976 | 326.455002 | 7.36763E-06 | 0.009396386 |
| 1275.399976 | 304.773071 | 6.8783E-06  | 0.008772588 |
| 1275.439976 | 296.336964 | 6.68791E-06 | 0.008530031 |
| 1275.479976 | 252.977144 | 5.70934E-06 | 0.007282151 |
| 1275.519976 | 197.851094 | 4.46522E-06 | 0.005695482 |
| 1275.559976 | 154.089825 | 3.47759E-06 | 0.004435878 |
| 1275.599976 | 133.680527 | 3.01698E-06 | 0.003848464 |
| 1275.639976 | 148.100774 | 3.34243E-06 | 0.004263735 |
| 1275.679976 | 168.704283 | 3.80742E-06 | 0.00485705  |
| 1275.719976 | 181.00796  | 4.0851E-06  | 0.005211441 |
| 1275.759976 | 192.972523 | 4.35512E-06 | 0.005556089 |
| 1275.799976 | 201.196319 | 4.54072E-06 | 0.005793051 |
| 1275.839976 | 198.734818 | 4.48517E-06 | 0.005722357 |
| 1275.879976 | 192.721962 | 4.34947E-06 | 0.005549397 |
| 1275.919976 | 199.240306 | 4.49658E-06 | 0.005737271 |
| 1275.959976 | 212.500866 | 4.79585E-06 | 0.006119311 |
| 1275.999976 | 216.159062 | 4.87841E-06 | 0.00622485  |
| 1276.039976 | 195.713012 | 4.41697E-06 | 0.00563623  |
| 1276.079976 | 179.404287 | 4.0489E-06  | 0.005166726 |

|             |            |             |             |
|-------------|------------|-------------|-------------|
| 1276.119976 | 197.251438 | 4.45169E-06 | 0.005680891 |
| 1276.159976 | 226.720497 | 5.11677E-06 | 0.006529812 |
| 1276.199976 | 270.141099 | 6.09671E-06 | 0.007780619 |
| 1276.239976 | 285.549344 | 6.44445E-06 | 0.008224666 |
| 1276.279976 | 271.548867 | 6.12848E-06 | 0.007821656 |
| 1276.319976 | 260.305142 | 5.87472E-06 | 0.007498028 |
| 1276.359976 | 243.865792 | 5.50371E-06 | 0.007024717 |
| 1276.399976 | 230.048624 | 5.19188E-06 | 0.006626912 |
| 1276.439976 | 216.609916 | 4.88858E-06 | 0.006239984 |
| 1276.479976 | 208.503223 | 4.70563E-06 | 0.006006639 |
| 1276.519976 | 214.476868 | 4.84044E-06 | 0.006178924 |
| 1276.559976 | 210.067318 | 4.74093E-06 | 0.006052077 |
| 1276.599976 | 198.155891 | 4.4721E-06  | 0.005709086 |
| 1276.639976 | 202.923082 | 4.57969E-06 | 0.005846617 |
| 1276.679976 | 212.9483   | 4.80595E-06 | 0.006135656 |
| 1276.719976 | 225.724346 | 5.09428E-06 | 0.006503974 |
| 1276.759976 | 229.796021 | 5.18618E-06 | 0.006621502 |
| 1276.799976 | 217.20456  | 4.902E-06   | 0.006258879 |
| 1276.839976 | 194.163669 | 4.382E-06   | 0.005595117 |
| 1276.879976 | 202.417794 | 4.56829E-06 | 0.005833155 |
| 1276.919976 | 236.164008 | 5.32989E-06 | 0.006805846 |
| 1276.959976 | 267.782141 | 6.04347E-06 | 0.007717269 |
| 1276.999976 | 281.66016  | 6.35668E-06 | 0.008117477 |
| 1277.039976 | 275.580292 | 6.21946E-06 | 0.007942503 |
| 1277.079976 | 273.746841 | 6.17808E-06 | 0.007889909 |
| 1277.119976 | 279.159058 | 6.30023E-06 | 0.008046151 |
| 1277.159976 | 284.966751 | 6.4313E-06  | 0.008213802 |
| 1277.199976 | 285.117469 | 6.4347E-06  | 0.008218404 |
| 1277.239976 | 283.796831 | 6.4049E-06  | 0.008180593 |
| 1277.279976 | 283.301376 | 6.39372E-06 | 0.008166567 |
| 1277.319976 | 289.333467 | 6.52985E-06 | 0.008340712 |
| 1277.359976 | 264.881204 | 5.978E-06   | 0.007636058 |
| 1277.399976 | 228.050853 | 5.14679E-06 | 0.00657451  |
| 1277.439976 | 205.221787 | 4.63157E-06 | 0.005916553 |
| 1277.479976 | 193.077568 | 4.35749E-06 | 0.005566608 |
| 1277.519976 | 187.157589 | 4.22389E-06 | 0.005396099 |
| 1277.559976 | 177.102627 | 3.99696E-06 | 0.005106356 |
| 1277.599976 | 185.350156 | 4.18309E-06 | 0.005344322 |
| 1277.639976 | 192.321755 | 4.34043E-06 | 0.005545512 |
| 1277.679976 | 192.728382 | 4.34961E-06 | 0.005557411 |
| 1277.719976 | 190.725037 | 4.3044E-06  | 0.005499816 |
| 1277.759976 | 181.151421 | 4.08834E-06 | 0.005223911 |
| 1277.799976 | 180.873374 | 4.08206E-06 | 0.005216056 |
| 1277.839976 | 200.550543 | 4.52615E-06 | 0.005783691 |
| 1277.879976 | 209.932956 | 4.73789E-06 | 0.00605446  |
| 1277.919976 | 204.562775 | 4.6167E-06  | 0.005899769 |

|             |            |             |             |
|-------------|------------|-------------|-------------|
| 1277.959976 | 202.16645  | 4.56262E-06 | 0.00583084  |
| 1277.999976 | 211.033112 | 4.76272E-06 | 0.00608676  |
| 1278.039976 | 216.007495 | 4.87499E-06 | 0.00623043  |
| 1278.079976 | 238.091736 | 5.3734E-06  | 0.006867633 |
| 1278.119976 | 239.834528 | 5.41273E-06 | 0.00691812  |
| 1278.159976 | 235.965452 | 5.32541E-06 | 0.006806728 |
| 1278.199976 | 257.722307 | 5.81643E-06 | 0.007434565 |
| 1278.239976 | 278.415599 | 6.28345E-06 | 0.00803176  |
| 1278.279976 | 292.522294 | 6.60182E-06 | 0.008438975 |
| 1278.319976 | 286.869662 | 6.47425E-06 | 0.008276161 |
| 1278.359976 | 262.60671  | 5.92667E-06 | 0.007576415 |
| 1278.399976 | 246.206611 | 5.55654E-06 | 0.007103481 |
| 1278.439976 | 243.932067 | 5.50521E-06 | 0.007038077 |
| 1278.479976 | 230.15529  | 5.19428E-06 | 0.006640788 |
| 1278.519976 | 223.60277  | 5.0464E-06  | 0.006451927 |
| 1278.559976 | 202.739218 | 4.57554E-06 | 0.005850105 |
| 1278.599976 | 179.476804 | 4.05054E-06 | 0.005179022 |
| 1278.639976 | 172.046864 | 3.88286E-06 | 0.004964778 |
| 1278.679976 | 188.953958 | 4.26443E-06 | 0.005452838 |
| 1278.719976 | 214.881736 | 4.84958E-06 | 0.006201257 |
| 1278.759976 | 209.561384 | 4.72951E-06 | 0.006047906 |
| 1278.799976 | 198.381655 | 4.4772E-06  | 0.00572544  |
| 1278.839976 | 193.915301 | 4.3764E-06  | 0.005596713 |
| 1278.879976 | 199.4649   | 4.50164E-06 | 0.005757064 |
| 1278.919976 | 208.886613 | 4.71428E-06 | 0.006029187 |
| 1278.959976 | 217.303317 | 4.90423E-06 | 0.006272318 |
| 1278.999976 | 223.793899 | 5.05072E-06 | 0.006459866 |
| 1279.039976 | 207.750369 | 4.68864E-06 | 0.005996953 |
| 1279.079976 | 230.969875 | 5.21267E-06 | 0.00666742  |
| 1279.119976 | 263.053748 | 5.93676E-06 | 0.007593824 |
| 1279.159976 | 291.050037 | 6.56859E-06 | 0.008402282 |
| 1279.199976 | 338.833236 | 7.64699E-06 | 0.009782035 |
| 1279.239976 | 366.541215 | 8.27232E-06 | 0.010582288 |
| 1279.279976 | 360.200079 | 8.12921E-06 | 0.010399541 |
| 1279.319976 | 366.279048 | 8.26641E-06 | 0.010575381 |
| 1279.359976 | 318.250575 | 7.18247E-06 | 0.009188967 |
| 1279.399976 | 260.003844 | 5.86792E-06 | 0.007507423 |
| 1279.439976 | 230.960785 | 5.21246E-06 | 0.006669034 |
| 1279.479976 | 206.068796 | 4.65069E-06 | 0.005950459 |
| 1279.519976 | 196.643092 | 4.43796E-06 | 0.005678459 |
| 1279.559976 | 189.722218 | 4.28177E-06 | 0.005478777 |
| 1279.599976 | 190.629681 | 4.30225E-06 | 0.005505154 |
| 1279.639976 | 186.138292 | 4.20088E-06 | 0.005375617 |
| 1279.679976 | 184.781433 | 4.17026E-06 | 0.005336598 |
| 1279.719976 | 181.34161  | 4.09263E-06 | 0.005237417 |
| 1279.759976 | 182.025845 | 4.10807E-06 | 0.005257343 |

|             |            |             |             |
|-------------|------------|-------------|-------------|
| 1279.799976 | 205.836353 | 4.64544E-06 | 0.005945234 |
| 1279.839976 | 221.996843 | 5.01016E-06 | 0.006412202 |
| 1279.879976 | 207.193022 | 4.67606E-06 | 0.005984793 |
| 1279.919976 | 199.208134 | 4.49585E-06 | 0.005754328 |
| 1279.959976 | 201.900698 | 4.55662E-06 | 0.005832288 |
| 1279.999976 | 196.339846 | 4.43112E-06 | 0.005671829 |
| 1280.039976 | 210.863303 | 4.75889E-06 | 0.006091571 |
| 1280.079976 | 221.610133 | 5.00143E-06 | 0.006402233 |
| 1280.119976 | 232.734301 | 5.25249E-06 | 0.006723816 |
| 1280.159976 | 275.059874 | 6.20772E-06 | 0.007946872 |
| 1280.199976 | 293.546056 | 6.62493E-06 | 0.00848123  |
| 1280.239976 | 283.961837 | 6.40862E-06 | 0.008204576 |
| 1280.279976 | 316.785459 | 7.14941E-06 | 0.009153242 |
| 1280.319976 | 326.237968 | 7.36274E-06 | 0.009426659 |
| 1280.359976 | 279.320695 | 6.30388E-06 | 0.008071234 |
| 1280.399976 | 231.387989 | 5.2221E-06  | 0.006686383 |
| 1280.439976 | 224.814304 | 5.07375E-06 | 0.006496627 |
| 1280.479976 | 214.953446 | 4.8512E-06  | 0.006211864 |
| 1280.519976 | 203.287312 | 4.58791E-06 | 0.005874912 |
| 1280.559976 | 192.391008 | 4.342E-06   | 0.005560188 |
| 1280.599976 | 186.836354 | 4.21664E-06 | 0.005399824 |
| 1280.639976 | 190.785656 | 4.30577E-06 | 0.005514137 |
| 1280.679976 | 210.823996 | 4.758E-06   | 0.00609348  |
| 1280.719976 | 217.740658 | 4.9141E-06  | 0.00629359  |
| 1280.759976 | 201.970818 | 4.5582E-06  | 0.00583796  |
| 1280.799976 | 195.588823 | 4.41417E-06 | 0.005653665 |
| 1280.839976 | 182.410025 | 4.11674E-06 | 0.005272885 |
| 1280.879976 | 179.299125 | 4.04653E-06 | 0.005183121 |
| 1280.919976 | 185.740769 | 4.19191E-06 | 0.005369502 |
| 1280.959976 | 184.035005 | 4.15341E-06 | 0.005320357 |
| 1280.999976 | 183.913492 | 4.15067E-06 | 0.00531701  |
| 1281.039976 | 194.467303 | 4.38886E-06 | 0.0056223   |
| 1281.079976 | 215.72285  | 4.86856E-06 | 0.00623702  |
| 1281.119976 | 258.752578 | 5.83969E-06 | 0.007481337 |
| 1281.159976 | 298.46564  | 6.73595E-06 | 0.008629834 |
| 1281.199976 | 313.623621 | 7.07805E-06 | 0.009068395 |
| 1281.239976 | 322.390793 | 7.27591E-06 | 0.009322188 |
| 1281.279976 | 312.838749 | 7.06033E-06 | 0.009046266 |
| 1281.319976 | 290.342687 | 6.55263E-06 | 0.008396016 |
| 1281.359976 | 252.205647 | 5.69193E-06 | 0.007293411 |
| 1281.399976 | 240.962486 | 5.43819E-06 | 0.006968494 |
| 1281.439976 | 219.38033  | 4.95111E-06 | 0.006344548 |
| 1281.479976 | 207.795442 | 4.68965E-06 | 0.006009697 |
| 1281.519976 | 211.50842  | 4.77345E-06 | 0.006117272 |
| 1281.559976 | 214.811698 | 4.848E-06   | 0.006213004 |
| 1281.599976 | 211.044842 | 4.76299E-06 | 0.006104245 |



|             |            |             |             |
|-------------|------------|-------------|-------------|
| 1281.639976 | 199.128537 | 4.49405E-06 | 0.005759759 |
| 1281.679976 | 195.556808 | 4.41344E-06 | 0.005656624 |
| 1281.719976 | 210.526026 | 4.75128E-06 | 0.006089809 |
| 1281.759976 | 205.680393 | 4.64192E-06 | 0.005949827 |
| 1281.799976 | 179.881222 | 4.05967E-06 | 0.005203683 |
| 1281.839976 | 184.871186 | 4.17229E-06 | 0.005348202 |
| 1281.879976 | 200.110729 | 4.51622E-06 | 0.005789253 |
| 1281.919976 | 203.765167 | 4.5987E-06  | 0.00589516  |
| 1281.959976 | 197.776157 | 4.46353E-06 | 0.00572207  |
| 1281.999976 | 187.314799 | 4.22743E-06 | 0.00541957  |
| 1282.039976 | 180.547069 | 4.0747E-06  | 0.005223923 |
| 1282.079976 | 190.181145 | 4.29212E-06 | 0.005502846 |
| 1282.119976 | 217.274132 | 4.90357E-06 | 0.006286971 |
| 1282.159976 | 247.483122 | 5.58535E-06 | 0.007161311 |
| 1282.199976 | 284.423285 | 6.41904E-06 | 0.00823049  |
| 1282.239976 | 306.675447 | 6.92124E-06 | 0.008874688 |
| 1282.279976 | 293.580976 | 6.62571E-06 | 0.00849602  |
| 1282.319976 | 264.262834 | 5.96404E-06 | 0.007647813 |
| 1282.359976 | 251.788237 | 5.68251E-06 | 0.007287023 |
| 1282.399976 | 261.299217 | 5.89716E-06 | 0.007562517 |
| 1282.439976 | 246.118372 | 5.55455E-06 | 0.007123375 |
| 1282.479976 | 225.771266 | 5.09534E-06 | 0.006534675 |
| 1282.519976 | 214.720671 | 4.84595E-06 | 0.006215023 |
| 1282.559976 | 202.830548 | 4.5776E-06  | 0.00587105  |
| 1282.599976 | 203.966626 | 4.60324E-06 | 0.005904119 |
| 1282.639976 | 200.257013 | 4.51952E-06 | 0.005796919 |
| 1282.679976 | 202.691608 | 4.57447E-06 | 0.005867578 |
| 1282.719976 | 210.752295 | 4.75639E-06 | 0.006101111 |
| 1282.759976 | 213.604217 | 4.82075E-06 | 0.006183865 |
| 1282.799976 | 191.327268 | 4.31799E-06 | 0.005539117 |
| 1282.839976 | 170.466496 | 3.84719E-06 | 0.004935331 |
| 1282.879976 | 166.081841 | 3.74824E-06 | 0.004808537 |
| 1282.919976 | 171.73986  | 3.87593E-06 | 0.004972507 |
| 1282.959976 | 186.042122 | 4.19871E-06 | 0.005386779 |
| 1282.999976 | 207.582822 | 4.68486E-06 | 0.006010669 |
| 1283.039976 | 229.960402 | 5.18989E-06 | 0.006658831 |
| 1283.079976 | 262.996482 | 5.93546E-06 | 0.007615675 |
| 1283.119976 | 286.222226 | 6.45964E-06 | 0.008288489 |
| 1283.159976 | 288.556317 | 6.51231E-06 | 0.008356341 |
| 1283.199976 | 280.608908 | 6.33295E-06 | 0.008126444 |
| 1283.239976 | 268.476805 | 6.05915E-06 | 0.00777534  |
| 1283.279976 | 265.868723 | 6.00029E-06 | 0.007700048 |
| 1283.319976 | 279.428949 | 6.30632E-06 | 0.008093029 |
| 1283.359976 | 307.161788 | 6.93221E-06 | 0.008896526 |
| 1283.399976 | 298.545926 | 6.73777E-06 | 0.008647248 |
| 1283.439976 | 243.494924 | 5.49534E-06 | 0.007052941 |

|             |            |             |             |
|-------------|------------|-------------|-------------|
| 1283.479976 | 204.025036 | 4.60456E-06 | 0.005909862 |
| 1283.519976 | 196.869963 | 4.44308E-06 | 0.005702783 |
| 1283.559976 | 196.641721 | 4.43793E-06 | 0.005696349 |
| 1283.599976 | 209.488199 | 4.72786E-06 | 0.006068677 |
| 1283.639976 | 204.022078 | 4.60449E-06 | 0.005910513 |
| 1283.679976 | 209.401064 | 4.72589E-06 | 0.006066531 |
| 1283.719976 | 211.462377 | 4.77241E-06 | 0.00612644  |
| 1283.759976 | 213.267651 | 4.81315E-06 | 0.006178934 |
| 1283.799976 | 219.32851  | 4.94994E-06 | 0.006354732 |
| 1283.839976 | 219.1193   | 4.94522E-06 | 0.006348868 |
| 1283.879976 | 204.021716 | 4.60449E-06 | 0.005911607 |
| 1283.919976 | 184.795607 | 4.17058E-06 | 0.00535469  |
| 1283.959976 | 161.167566 | 3.63733E-06 | 0.004670183 |
| 1283.999976 | 161.257251 | 3.63935E-06 | 0.004672927 |
| 1284.039976 | 176.211108 | 3.97684E-06 | 0.005106421 |
| 1284.079976 | 204.431126 | 4.61373E-06 | 0.005924393 |
| 1284.119976 | 241.01617  | 5.4394E-06  | 0.006984841 |
| 1284.159976 | 250.62114  | 5.65617E-06 | 0.007263427 |
| 1284.199976 | 246.374681 | 5.56033E-06 | 0.00714058  |
| 1284.239976 | 260.474803 | 5.87855E-06 | 0.007549473 |
| 1284.279976 | 293.760583 | 6.62977E-06 | 0.008514477 |
| 1284.319976 | 342.212036 | 7.72325E-06 | 0.009919123 |
| 1284.359976 | 324.533979 | 7.32428E-06 | 0.009407012 |
| 1284.399976 | 261.385434 | 5.89911E-06 | 0.007576811 |
| 1284.439976 | 218.072963 | 4.9216E-06  | 0.006321504 |
| 1284.479976 | 211.048464 | 4.76307E-06 | 0.006118068 |
| 1284.519976 | 221.477052 | 4.99843E-06 | 0.006420581 |
| 1284.559976 | 208.900573 | 4.71459E-06 | 0.00605618  |
| 1284.599976 | 193.4293   | 4.36543E-06 | 0.005607831 |
| 1284.639976 | 190.371132 | 4.29641E-06 | 0.005519342 |
| 1284.679976 | 195.471833 | 4.41153E-06 | 0.0056674   |
| 1284.719976 | 216.600053 | 4.88836E-06 | 0.006280176 |
| 1284.759976 | 238.633826 | 5.38563E-06 | 0.006919246 |
| 1284.799976 | 232.402407 | 5.245E-06   | 0.006738774 |
| 1284.839976 | 218.34761  | 4.9278E-06  | 0.006331436 |
| 1284.879976 | 208.483247 | 4.70518E-06 | 0.006045587 |
| 1284.919976 | 198.096774 | 4.47077E-06 | 0.005744579 |
| 1284.959976 | 200.46773  | 4.52428E-06 | 0.005813515 |
| 1284.999976 | 209.792766 | 4.73473E-06 | 0.006084129 |
| 1285.039976 | 215.789258 | 4.87006E-06 | 0.006258226 |
| 1285.079976 | 254.273978 | 5.73861E-06 | 0.007374572 |
| 1285.119976 | 293.822652 | 6.63117E-06 | 0.008521846 |
| 1285.159976 | 292.236476 | 6.59537E-06 | 0.008476106 |
| 1285.199976 | 299.639943 | 6.76246E-06 | 0.008691108 |
| 1285.239976 | 329.368516 | 7.43339E-06 | 0.009553688 |
| 1285.279976 | 343.468878 | 7.75161E-06 | 0.009962994 |

|             |            |             |             |
|-------------|------------|-------------|-------------|
| 1285.319976 | 320.368515 | 7.23027E-06 | 0.009293212 |
| 1285.359976 | 294.731556 | 6.65168E-06 | 0.008549804 |
| 1285.399976 | 283.751696 | 6.40388E-06 | 0.008231548 |
| 1285.439976 | 257.668087 | 5.81521E-06 | 0.007475103 |
| 1285.479976 | 255.29773  | 5.76171E-06 | 0.007406568 |
| 1285.519976 | 255.119154 | 5.75768E-06 | 0.007401618 |
| 1285.559976 | 221.394038 | 4.99656E-06 | 0.006423371 |
| 1285.599976 | 194.618926 | 4.39228E-06 | 0.005646713 |
| 1285.639976 | 172.142195 | 3.88501E-06 | 0.004994724 |
| 1285.679976 | 165.000836 | 3.72384E-06 | 0.004787665 |
| 1285.719976 | 184.408135 | 4.16183E-06 | 0.005350954 |
| 1285.759976 | 199.92554  | 4.51204E-06 | 0.005801402 |
| 1285.799976 | 223.643074 | 5.04731E-06 | 0.006489835 |
| 1285.839976 | 237.694846 | 5.36444E-06 | 0.006897813 |
| 1285.879976 | 214.693796 | 4.84534E-06 | 0.006230526 |
| 1285.919976 | 200.147847 | 4.51706E-06 | 0.005808575 |
| 1285.959976 | 185.703911 | 4.19108E-06 | 0.005389559 |
| 1285.999976 | 176.565064 | 3.98483E-06 | 0.005124488 |
| 1286.039976 | 190.013666 | 4.28834E-06 | 0.005514982 |
| 1286.079976 | 218.528063 | 4.93187E-06 | 0.006342784 |
| 1286.119976 | 225.929248 | 5.09891E-06 | 0.006557808 |
| 1286.159976 | 255.9266   | 5.77591E-06 | 0.00742874  |
| 1286.199976 | 293.585067 | 6.62581E-06 | 0.008522112 |
| 1286.239976 | 310.455378 | 7.00655E-06 | 0.009012099 |
| 1286.279976 | 300.388892 | 6.77936E-06 | 0.008720154 |
| 1286.319976 | 274.371618 | 6.19219E-06 | 0.007965132 |
| 1286.359976 | 249.099935 | 5.62184E-06 | 0.007231708 |
| 1286.399976 | 244.511381 | 5.51828E-06 | 0.007098717 |
| 1286.439976 | 263.149072 | 5.93891E-06 | 0.007640049 |
| 1286.479976 | 250.908711 | 5.66266E-06 | 0.007284899 |
| 1286.519976 | 221.767753 | 5.00499E-06 | 0.006439019 |
| 1286.559976 | 201.472403 | 4.54695E-06 | 0.005849926 |
| 1286.599976 | 184.604648 | 4.16627E-06 | 0.005360323 |
| 1286.639976 | 177.361704 | 4.00281E-06 | 0.005150171 |
| 1286.679976 | 186.868827 | 4.21737E-06 | 0.005426404 |
| 1286.719976 | 209.647652 | 4.73146E-06 | 0.006088058 |
| 1286.759976 | 217.614947 | 4.91127E-06 | 0.006319621 |
| 1286.799976 | 214.391363 | 4.83851E-06 | 0.0062262   |
| 1286.839976 | 200.816569 | 4.53215E-06 | 0.005832152 |
| 1286.879976 | 184.913139 | 4.17323E-06 | 0.005370449 |
| 1286.919976 | 189.945165 | 4.2868E-06  | 0.005516766 |
| 1286.959976 | 198.828289 | 4.48728E-06 | 0.005774947 |
| 1286.999976 | 221.558439 | 5.00027E-06 | 0.006435341 |
| 1287.039976 | 235.562013 | 5.31631E-06 | 0.006842299 |
| 1287.079976 | 210.373076 | 4.74783E-06 | 0.006110833 |
| 1287.119976 | 219.62301  | 4.95659E-06 | 0.00637972  |

|             |            |             |             |
|-------------|------------|-------------|-------------|
| 1287.159976 | 256.14352  | 5.7808E-06  | 0.007440818 |
| 1287.199976 | 291.39439  | 6.57637E-06 | 0.008465098 |
| 1287.239976 | 335.532271 | 7.5725E-06  | 0.00974762  |
| 1287.279976 | 344.167587 | 7.76738E-06 | 0.009998797 |
| 1287.319976 | 311.902166 | 7.0392E-06  | 0.009061699 |
| 1287.359976 | 266.793969 | 6.02117E-06 | 0.007751411 |
| 1287.399976 | 236.682001 | 5.34158E-06 | 0.006876754 |
| 1287.439976 | 232.574826 | 5.24889E-06 | 0.006757631 |
| 1287.479976 | 222.55132  | 5.02267E-06 | 0.006466591 |
| 1287.519976 | 207.709238 | 4.68771E-06 | 0.006035518 |
| 1287.559976 | 176.628321 | 3.98626E-06 | 0.005132543 |
| 1287.599976 | 157.804469 | 3.56143E-06 | 0.004585693 |
| 1287.639976 | 162.780223 | 3.67372E-06 | 0.004730432 |
| 1287.679976 | 177.069429 | 3.99621E-06 | 0.00514584  |
| 1287.719976 | 190.291494 | 4.29461E-06 | 0.00553026  |
| 1287.759976 | 188.445336 | 4.25295E-06 | 0.005476777 |
| 1287.799976 | 172.955856 | 3.90337E-06 | 0.005026763 |
| 1287.839976 | 170.683762 | 3.85209E-06 | 0.004960882 |
| 1287.879976 | 194.121236 | 4.38105E-06 | 0.005642261 |
| 1287.919976 | 191.006277 | 4.31075E-06 | 0.005551895 |
| 1287.959976 | 178.295973 | 4.02389E-06 | 0.005182612 |
| 1287.999976 | 169.805419 | 3.83227E-06 | 0.004935966 |
| 1288.039976 | 199.073948 | 4.49282E-06 | 0.005786934 |
| 1288.079976 | 240.952289 | 5.43796E-06 | 0.007004524 |
| 1288.119976 | 284.119218 | 6.41218E-06 | 0.008259651 |
| 1288.159976 | 288.674841 | 6.51499E-06 | 0.008392348 |
| 1288.199976 | 304.908185 | 6.88135E-06 | 0.008864559 |
| 1288.239976 | 323.366356 | 7.29793E-06 | 0.009401483 |
| 1288.279976 | 324.23358  | 7.3175E-06  | 0.009426989 |
| 1288.319976 | 328.272471 | 7.40865E-06 | 0.009544715 |
| 1288.359976 | 308.052007 | 6.9523E-06  | 0.008957071 |
| 1288.399976 | 255.430382 | 5.76471E-06 | 0.00742725  |
| 1288.439976 | 225.433046 | 5.08771E-06 | 0.006555209 |
| 1288.479976 | 228.422603 | 5.15518E-06 | 0.006642346 |
| 1288.519976 | 217.138614 | 4.90052E-06 | 0.006314413 |
| 1288.559976 | 207.187787 | 4.67594E-06 | 0.006025229 |
| 1288.599976 | 198.026127 | 4.46917E-06 | 0.005758977 |
| 1288.639976 | 194.089183 | 4.38032E-06 | 0.005644659 |
| 1288.679976 | 199.531989 | 4.50316E-06 | 0.005803131 |
| 1288.719976 | 203.914763 | 4.60207E-06 | 0.005930782 |
| 1288.759976 | 199.203416 | 4.49574E-06 | 0.005793934 |
| 1288.799976 | 216.558576 | 4.88743E-06 | 0.006298914 |
| 1288.839976 | 206.290763 | 4.6557E-06  | 0.006000446 |
| 1288.879976 | 185.450567 | 4.18536E-06 | 0.005394428 |
| 1288.919976 | 174.9185   | 3.94767E-06 | 0.005088227 |
| 1288.959976 | 195.601283 | 4.41445E-06 | 0.005690047 |

|             |            |             |             |
|-------------|------------|-------------|-------------|
| 1288.999976 | 232.173088 | 5.23982E-06 | 0.006754132 |
| 1289.039976 | 263.542333 | 5.94778E-06 | 0.007666931 |
| 1289.079976 | 285.48444  | 6.44299E-06 | 0.008305524 |
| 1289.119976 | 299.46814  | 6.75858E-06 | 0.008712619 |
| 1289.159976 | 300.583303 | 6.78375E-06 | 0.008745334 |
| 1289.199976 | 334.744813 | 7.55472E-06 | 0.00973955  |
| 1289.239976 | 350.623663 | 7.91309E-06 | 0.010201869 |
| 1289.279976 | 367.497104 | 8.2939E-06  | 0.010693156 |
| 1289.319976 | 350.291324 | 7.90559E-06 | 0.010192832 |
| 1289.359976 | 293.556888 | 6.62517E-06 | 0.008542229 |
| 1289.399976 | 243.33034  | 5.49163E-06 | 0.007080904 |
| 1289.439976 | 220.59552  | 4.97853E-06 | 0.00641952  |
| 1289.479976 | 206.057442 | 4.65043E-06 | 0.005996636 |
| 1289.519976 | 187.542267 | 4.23257E-06 | 0.005457981 |
| 1289.559976 | 178.368744 | 4.02553E-06 | 0.005191168 |
| 1289.599976 | 187.525297 | 4.23218E-06 | 0.005457825 |
| 1289.639976 | 193.571672 | 4.36864E-06 | 0.005633977 |
| 1289.679976 | 211.736213 | 4.77859E-06 | 0.006162854 |
| 1289.719976 | 221.855924 | 5.00698E-06 | 0.006457601 |
| 1289.759976 | 204.300555 | 4.61078E-06 | 0.005946798 |
| 1289.799976 | 200.449249 | 4.52386E-06 | 0.005834875 |
| 1289.839976 | 204.697525 | 4.61974E-06 | 0.005958723 |
| 1289.879976 | 197.72015  | 4.46227E-06 | 0.005755791 |
| 1289.919976 | 189.796592 | 4.28344E-06 | 0.005525301 |
| 1289.959976 | 191.771364 | 4.32801E-06 | 0.005582963 |
| 1289.999976 | 207.584746 | 4.6849E-06  | 0.006043519 |
| 1290.039976 | 213.594845 | 4.82054E-06 | 0.006218687 |
| 1290.079976 | 207.879788 | 4.69156E-06 | 0.006052484 |
| 1290.119976 | 216.773109 | 4.89227E-06 | 0.006311612 |
| 1290.159976 | 243.292455 | 5.49077E-06 | 0.007083974 |
| 1290.199976 | 264.488321 | 5.96913E-06 | 0.007701375 |
| 1290.239976 | 264.170488 | 5.96196E-06 | 0.007692359 |
| 1290.279976 | 261.664339 | 5.9054E-06  | 0.007619619 |
| 1290.319976 | 275.75949  | 6.22351E-06 | 0.008030316 |
| 1290.359976 | 264.920547 | 5.97889E-06 | 0.007714917 |
| 1290.399976 | 247.759358 | 5.59158E-06 | 0.007215379 |
| 1290.439976 | 237.995352 | 5.37122E-06 | 0.006931242 |
| 1290.479976 | 216.263233 | 4.88076E-06 | 0.006298523 |
| 1290.519976 | 202.889003 | 4.57892E-06 | 0.005909191 |
| 1290.559976 | 198.178802 | 4.47262E-06 | 0.005772184 |
| 1290.599976 | 187.72551  | 4.2367E-06  | 0.005467889 |
| 1290.639976 | 176.573228 | 3.98501E-06 | 0.005143216 |
| 1290.679976 | 202.605395 | 4.57252E-06 | 0.005901662 |
| 1290.719976 | 222.638478 | 5.02464E-06 | 0.006485404 |
| 1290.759976 | 217.741758 | 4.91413E-06 | 0.00634296  |
| 1290.799976 | 188.638968 | 4.25732E-06 | 0.005495347 |

|             |            |             |             |
|-------------|------------|-------------|-------------|
| 1290.839976 | 163.145593 | 3.68197E-06 | 0.004752833 |
| 1290.879976 | 183.552167 | 4.14252E-06 | 0.005347492 |
| 1290.919976 | 230.954224 | 5.21232E-06 | 0.006728682 |
| 1290.959976 | 240.433119 | 5.42624E-06 | 0.007005059 |
| 1290.999976 | 233.771823 | 5.2759E-06  | 0.006811192 |
| 1291.039976 | 242.024952 | 5.46217E-06 | 0.007051875 |
| 1291.079976 | 239.368215 | 5.40221E-06 | 0.006974682 |
| 1291.119976 | 257.081771 | 5.80198E-06 | 0.007491049 |
| 1291.159976 | 287.46514  | 6.48769E-06 | 0.008376643 |
| 1291.199976 | 319.507898 | 7.21085E-06 | 0.009310647 |
| 1291.239976 | 324.903734 | 7.33262E-06 | 0.009468178 |
| 1291.279976 | 312.316906 | 7.04856E-06 | 0.009101661 |
| 1291.319976 | 290.445371 | 6.55495E-06 | 0.008464535 |
| 1291.359976 | 279.823599 | 6.31523E-06 | 0.008155234 |
| 1291.399976 | 266.224806 | 6.00832E-06 | 0.007759148 |
| 1291.439976 | 244.841756 | 5.52574E-06 | 0.007136158 |
| 1291.479976 | 226.953962 | 5.12203E-06 | 0.006615005 |
| 1291.519976 | 202.821441 | 4.5774E-06  | 0.0059118   |
| 1291.559976 | 172.038749 | 3.88267E-06 | 0.005014708 |
| 1291.599976 | 153.175991 | 3.45697E-06 | 0.004465021 |
| 1291.639976 | 161.485672 | 3.64451E-06 | 0.004707391 |
| 1291.679976 | 176.285751 | 3.97852E-06 | 0.00513898  |
| 1291.719976 | 202.287866 | 4.56536E-06 | 0.005897161 |
| 1291.759976 | 228.259107 | 5.15149E-06 | 0.006654489 |
| 1291.799976 | 235.675857 | 5.31888E-06 | 0.006870924 |
| 1291.839976 | 213.82582  | 4.82575E-06 | 0.006234098 |
| 1291.879976 | 188.310998 | 4.24992E-06 | 0.005490383 |
| 1291.919976 | 193.175572 | 4.3597E-06  | 0.005632388 |
| 1291.959976 | 185.91721  | 4.19589E-06 | 0.005420925 |
| 1291.999976 | 194.466025 | 4.38883E-06 | 0.005670365 |
| 1292.039976 | 224.093785 | 5.05748E-06 | 0.006534472 |
| 1292.079976 | 233.520481 | 5.27023E-06 | 0.006809561 |
| 1292.119976 | 223.030072 | 5.03348E-06 | 0.006503858 |
| 1292.159976 | 228.974707 | 5.16764E-06 | 0.006677418 |
| 1292.199976 | 253.627846 | 5.72403E-06 | 0.007396588 |
| 1292.239976 | 277.834939 | 6.27035E-06 | 0.008102794 |
| 1292.279976 | 303.837028 | 6.85718E-06 | 0.008861394 |
| 1292.319976 | 312.124435 | 7.04421E-06 | 0.009103378 |
| 1292.359976 | 285.599892 | 6.44559E-06 | 0.008330025 |
| 1292.399976 | 231.623971 | 5.22743E-06 | 0.006755931 |
| 1292.439976 | 206.66555  | 4.66415E-06 | 0.006028139 |
| 1292.479976 | 239.261591 | 5.3998E-06  | 0.006979134 |
| 1292.519976 | 259.661129 | 5.86019E-06 | 0.007574413 |
| 1292.559976 | 231.448602 | 5.22347E-06 | 0.006751652 |
| 1292.599976 | 202.645972 | 4.57344E-06 | 0.005911625 |
| 1292.639976 | 186.996896 | 4.22026E-06 | 0.005455276 |

|             |            |             |             |
|-------------|------------|-------------|-------------|
| 1292.679976 | 194.842366 | 4.39732E-06 | 0.005684329 |
| 1292.719976 | 213.337198 | 4.81472E-06 | 0.006224089 |
| 1292.759976 | 220.267175 | 4.97112E-06 | 0.006426469 |
| 1292.799976 | 229.826562 | 5.18687E-06 | 0.006705579 |
| 1292.839976 | 226.634539 | 5.11483E-06 | 0.006612651 |
| 1292.879976 | 215.98019  | 4.87437E-06 | 0.006301978 |
| 1292.919976 | 208.713533 | 4.71037E-06 | 0.006090136 |
| 1292.959976 | 224.114826 | 5.05796E-06 | 0.006539739 |
| 1292.999976 | 246.685976 | 5.56736E-06 | 0.007198595 |
| 1293.039976 | 242.832001 | 5.48038E-06 | 0.00708635  |
| 1293.079976 | 242.819075 | 5.48009E-06 | 0.007086192 |
| 1293.119976 | 258.981501 | 5.84485E-06 | 0.007558095 |
| 1293.159976 | 282.774325 | 6.38182E-06 | 0.008252718 |
| 1293.199976 | 301.662627 | 6.80811E-06 | 0.008804242 |
| 1293.239976 | 321.105977 | 7.24691E-06 | 0.009372    |
| 1293.279976 | 318.776889 | 7.19435E-06 | 0.009304309 |
| 1293.319976 | 314.818136 | 7.10501E-06 | 0.009189047 |
| 1293.359976 | 294.468406 | 6.64574E-06 | 0.008595336 |
| 1293.399976 | 267.070712 | 6.02741E-06 | 0.007795857 |
| 1293.439976 | 244.052764 | 5.50793E-06 | 0.007124178 |
| 1293.479976 | 226.393552 | 5.10939E-06 | 0.00660889  |
| 1293.519976 | 200.131244 | 4.51668E-06 | 0.00584242  |
| 1293.559976 | 159.957811 | 3.61002E-06 | 0.004669784 |
| 1293.599976 | 149.757633 | 3.37982E-06 | 0.004372137 |
| 1293.639976 | 168.269716 | 3.79761E-06 | 0.004912744 |
| 1293.679976 | 175.676343 | 3.96477E-06 | 0.005129144 |
| 1293.719976 | 173.998956 | 3.92691E-06 | 0.005080327 |
| 1293.759976 | 159.096599 | 3.59059E-06 | 0.00464536  |
| 1293.799976 | 172.043813 | 3.88279E-06 | 0.005023553 |
| 1293.839976 | 163.936608 | 3.69982E-06 | 0.004786976 |
| 1293.879976 | 169.844017 | 3.83314E-06 | 0.004959627 |
| 1293.919976 | 179.361317 | 4.04794E-06 | 0.005237704 |
| 1293.959976 | 178.189939 | 4.0215E-06  | 0.005203658 |
| 1293.999976 | 178.08988  | 4.01924E-06 | 0.005200897 |
| 1294.039976 | 198.304507 | 4.47546E-06 | 0.00579142  |
| 1294.079976 | 225.779418 | 5.09553E-06 | 0.006594019 |
| 1294.119976 | 252.620331 | 5.70129E-06 | 0.007378152 |
| 1294.159976 | 266.360756 | 6.01139E-06 | 0.007779702 |
| 1294.199976 | 287.072671 | 6.47883E-06 | 0.008384902 |
| 1294.239976 | 290.931485 | 6.56592E-06 | 0.008497874 |
| 1294.279976 | 291.140342 | 6.57063E-06 | 0.008504237 |
| 1294.319976 | 266.475879 | 6.01399E-06 | 0.007784027 |
| 1294.359976 | 256.856599 | 5.7969E-06  | 0.00750327  |
| 1294.399976 | 254.586845 | 5.74567E-06 | 0.007437196 |
| 1294.439976 | 228.782255 | 5.1633E-06  | 0.006683578 |
| 1294.479976 | 222.977087 | 5.03228E-06 | 0.006514189 |

|             |            |             |             |
|-------------|------------|-------------|-------------|
| 1294.519976 | 210.541435 | 4.75163E-06 | 0.006151076 |
| 1294.559976 | 186.29255  | 4.20436E-06 | 0.005442801 |
| 1294.599976 | 170.207463 | 3.84135E-06 | 0.004973006 |
| 1294.639976 | 175.678931 | 3.96483E-06 | 0.005133026 |
| 1294.679976 | 198.946831 | 4.48995E-06 | 0.005813052 |
| 1294.719976 | 233.394148 | 5.26738E-06 | 0.006819783 |
| 1294.759976 | 240.101988 | 5.41877E-06 | 0.007016003 |
| 1294.799976 | 223.668405 | 5.04788E-06 | 0.006536001 |
| 1294.839976 | 226.814928 | 5.1189E-06  | 0.006628152 |
| 1294.879976 | 221.487784 | 4.99867E-06 | 0.006472679 |
| 1294.919976 | 220.36007  | 4.97322E-06 | 0.006439922 |
| 1294.959976 | 222.238366 | 5.01561E-06 | 0.006495015 |
| 1294.999976 | 222.557214 | 5.02281E-06 | 0.006504534 |
| 1295.039976 | 229.055593 | 5.16947E-06 | 0.006694665 |
| 1295.079976 | 242.427146 | 5.47124E-06 | 0.007085697 |
| 1295.119976 | 259.443092 | 5.85527E-06 | 0.007583276 |
| 1295.159976 | 274.663041 | 6.19876E-06 | 0.008028389 |
| 1295.199976 | 280.948391 | 6.34061E-06 | 0.008212363 |
| 1295.239976 | 302.332525 | 6.82322E-06 | 0.008837712 |
| 1295.279976 | 325.751706 | 7.35176E-06 | 0.00952259  |
| 1295.319976 | 301.563483 | 6.80587E-06 | 0.008815776 |
| 1295.359976 | 261.135303 | 5.89346E-06 | 0.007634152 |
| 1295.399976 | 235.426119 | 5.31324E-06 | 0.00688277  |
| 1295.439976 | 234.26081  | 5.28694E-06 | 0.006848914 |
| 1295.479976 | 230.908275 | 5.21128E-06 | 0.006751106 |
| 1295.519976 | 206.884951 | 4.66911E-06 | 0.006048919 |
| 1295.559976 | 186.001879 | 4.1978E-06  | 0.005438506 |
| 1295.599976 | 191.462301 | 4.32104E-06 | 0.005598336 |
| 1295.639976 | 212.582407 | 4.79769E-06 | 0.006216077 |
| 1295.679976 | 206.049701 | 4.65025E-06 | 0.006025242 |
| 1295.719976 | 177.354482 | 4.00264E-06 | 0.005186305 |
| 1295.759976 | 165.359574 | 3.73194E-06 | 0.004835692 |
| 1295.799976 | 164.993202 | 3.72367E-06 | 0.004825127 |
| 1295.839976 | 176.005268 | 3.97219E-06 | 0.005147327 |
| 1295.879976 | 183.581104 | 4.14317E-06 | 0.005369051 |
| 1295.919976 | 185.292111 | 4.18178E-06 | 0.005419259 |
| 1295.959976 | 210.6835   | 4.75483E-06 | 0.006162073 |
| 1295.999976 | 209.790209 | 4.73467E-06 | 0.006136136 |
| 1296.039976 | 203.290117 | 4.58797E-06 | 0.005946199 |
| 1296.079976 | 216.069593 | 4.87639E-06 | 0.006320191 |
| 1296.119975 | 223.077325 | 5.03454E-06 | 0.006525374 |
| 1296.159975 | 248.192395 | 5.60136E-06 | 0.007260254 |
| 1296.199975 | 282.477944 | 6.37513E-06 | 0.008263448 |
| 1296.239975 | 274.009058 | 6.184E-06   | 0.008015952 |
| 1296.279975 | 266.611758 | 6.01706E-06 | 0.007799789 |
| 1296.319975 | 289.080271 | 6.52414E-06 | 0.008457372 |



|             |            |             |             |
|-------------|------------|-------------|-------------|
| 1296.359975 | 303.106829 | 6.8407E-06  | 0.008868008 |
| 1296.399975 | 282.173671 | 6.36827E-06 | 0.008255821 |
| 1296.439975 | 238.27077  | 5.37744E-06 | 0.006971527 |
| 1296.479975 | 215.126613 | 4.85511E-06 | 0.00629455  |
| 1296.519975 | 204.1892   | 4.60827E-06 | 0.005974709 |
| 1296.559975 | 188.890004 | 4.26298E-06 | 0.005527215 |
| 1296.599975 | 178.032453 | 4.01794E-06 | 0.005209667 |
| 1296.639975 | 167.743868 | 3.78575E-06 | 0.004908749 |
| 1296.679975 | 166.948567 | 3.7678E-06  | 0.004885626 |
| 1296.719975 | 187.30698  | 4.22726E-06 | 0.005481569 |
| 1296.759975 | 208.843059 | 4.7133E-06  | 0.006112015 |
| 1296.799975 | 223.74027  | 5.04951E-06 | 0.0065482   |
| 1296.839975 | 235.251965 | 5.30931E-06 | 0.006885324 |
| 1296.879975 | 229.45047  | 5.17838E-06 | 0.006715734 |
| 1296.919975 | 216.915149 | 4.89547E-06 | 0.006349036 |
| 1296.959975 | 215.851005 | 4.87146E-06 | 0.006318084 |
| 1296.999975 | 233.613128 | 5.27232E-06 | 0.006838203 |
| 1297.039975 | 248.243948 | 5.60252E-06 | 0.007266693 |
| 1297.079975 | 268.075066 | 6.05008E-06 | 0.007847439 |
| 1297.119975 | 324.740988 | 7.32895E-06 | 0.00950653  |
| 1297.159975 | 362.911244 | 8.1904E-06  | 0.010624261 |
| 1297.199975 | 369.176929 | 8.33181E-06 | 0.010808023 |
| 1297.239975 | 386.889719 | 8.73156E-06 | 0.011326931 |
| 1297.279975 | 390.865    | 8.82128E-06 | 0.011443668 |
| 1297.319975 | 383.651524 | 8.65848E-06 | 0.01123282  |
| 1297.359975 | 378.475192 | 8.54166E-06 | 0.011081605 |
| 1297.399975 | 343.275243 | 7.74724E-06 | 0.010051274 |
| 1297.439975 | 295.972018 | 6.67968E-06 | 0.008666479 |
| 1297.479975 | 256.767602 | 5.79489E-06 | 0.00751875  |
| 1297.519975 | 230.865325 | 5.21031E-06 | 0.00676048  |
| 1297.559975 | 205.53157  | 4.63856E-06 | 0.006018811 |
| 1297.599975 | 186.488596 | 4.20879E-06 | 0.005461323 |
| 1297.639975 | 185.200838 | 4.17972E-06 | 0.005423778 |
| 1297.679975 | 202.057407 | 4.56015E-06 | 0.005917621 |
| 1297.719975 | 202.645422 | 4.57342E-06 | 0.005935025 |
| 1297.759975 | 185.930366 | 4.19619E-06 | 0.005445647 |
| 1297.799975 | 193.340415 | 4.36342E-06 | 0.005662851 |
| 1297.839975 | 205.449922 | 4.63672E-06 | 0.006017719 |
| 1297.879975 | 199.575738 | 4.50415E-06 | 0.005845841 |
| 1297.919975 | 183.015424 | 4.1304E-06  | 0.005360933 |
| 1297.959975 | 168.728586 | 3.80797E-06 | 0.004942592 |
| 1297.999975 | 184.706792 | 4.16858E-06 | 0.00541081  |
| 1298.039975 | 222.560816 | 5.02289E-06 | 0.006519909 |
| 1298.079975 | 267.077304 | 6.02756E-06 | 0.007824258 |
| 1298.119975 | 299.592258 | 6.76138E-06 | 0.008777082 |
| 1298.159975 | 300.261785 | 6.77649E-06 | 0.008796968 |

|             |            |             |             |
|-------------|------------|-------------|-------------|
| 1298.199975 | 296.412783 | 6.68962E-06 | 0.008684469 |
| 1298.239975 | 336.248013 | 7.58865E-06 | 0.009851888 |
| 1298.279975 | 379.411005 | 8.56278E-06 | 0.011116883 |
| 1298.319975 | 367.835398 | 8.30153E-06 | 0.010778046 |
| 1298.359975 | 348.514269 | 7.86548E-06 | 0.010212227 |
| 1298.399975 | 312.71042  | 7.05744E-06 | 0.009163378 |
| 1298.439975 | 268.048949 | 6.04949E-06 | 0.007854901 |
| 1298.479975 | 233.062837 | 5.2599E-06  | 0.006829879 |
| 1298.519975 | 218.087005 | 4.92192E-06 | 0.006391211 |
| 1298.559975 | 213.659744 | 4.822E-06   | 0.00626166  |
| 1298.599975 | 233.195521 | 5.2629E-06  | 0.006834399 |
| 1298.639975 | 245.977137 | 5.55136E-06 | 0.00720922  |
| 1298.679975 | 214.094969 | 4.83183E-06 | 0.006274995 |
| 1298.719975 | 201.228545 | 4.54145E-06 | 0.005898069 |
| 1298.759975 | 206.582375 | 4.66228E-06 | 0.006055178 |
| 1298.799975 | 215.536191 | 4.86435E-06 | 0.00631782  |
| 1298.839975 | 227.715492 | 5.13922E-06 | 0.006675026 |
| 1298.879975 | 225.895812 | 5.09815E-06 | 0.00662189  |
| 1298.919975 | 207.792944 | 4.6896E-06  | 0.006091412 |
| 1298.959975 | 194.984657 | 4.40053E-06 | 0.005716115 |
| 1298.999975 | 206.566186 | 4.66191E-06 | 0.006055822 |
| 1299.039975 | 229.82116  | 5.18674E-06 | 0.006737787 |
| 1299.079975 | 243.800806 | 5.50224E-06 | 0.007147856 |
| 1299.119975 | 269.734159 | 6.08752E-06 | 0.007908424 |
| 1299.159975 | 284.036409 | 6.41031E-06 | 0.008328013 |
| 1299.199975 | 284.676919 | 6.42476E-06 | 0.00834705  |
| 1299.239975 | 323.764889 | 7.30692E-06 | 0.009493446 |
| 1299.279975 | 351.698661 | 7.93735E-06 | 0.010312838 |
| 1299.319975 | 342.215504 | 7.72333E-06 | 0.010035073 |
| 1299.359975 | 302.843496 | 6.83476E-06 | 0.008880808 |
| 1299.399975 | 249.968253 | 5.64144E-06 | 0.007330481 |
| 1299.439975 | 206.094637 | 4.65127E-06 | 0.006044045 |
| 1299.479975 | 189.399727 | 4.27449E-06 | 0.005554612 |
| 1299.519975 | 190.816803 | 4.30647E-06 | 0.005596343 |
| 1299.559975 | 172.987912 | 3.9041E-06  | 0.005073607 |
| 1299.599975 | 178.993374 | 4.03963E-06 | 0.005249905 |
| 1299.639975 | 177.146473 | 3.99795E-06 | 0.005195895 |
| 1299.679975 | 162.979648 | 3.67822E-06 | 0.004780514 |
| 1299.719975 | 153.147891 | 3.45633E-06 | 0.004492267 |
| 1299.759975 | 159.085723 | 3.59034E-06 | 0.004666584 |
| 1299.799975 | 170.31158  | 3.8437E-06  | 0.004996035 |
| 1299.839975 | 179.819526 | 4.05828E-06 | 0.00527511  |
| 1299.879975 | 191.402243 | 4.31968E-06 | 0.005615068 |
| 1299.919975 | 200.043115 | 4.51469E-06 | 0.005868742 |
| 1299.959975 | 186.178426 | 4.20179E-06 | 0.005462156 |
| 1299.999975 | 184.143395 | 4.15586E-06 | 0.005402618 |

|             |            |             |             |
|-------------|------------|-------------|-------------|
| 1300.039975 | 199.362651 | 4.49934E-06 | 0.005849318 |
| 1300.079975 | 205.30558  | 4.63346E-06 | 0.00602387  |
| 1300.119975 | 215.07237  | 4.85388E-06 | 0.006310631 |
| 1300.159975 | 224.058953 | 5.0567E-06  | 0.006574517 |
| 1300.199975 | 257.039219 | 5.80102E-06 | 0.007542482 |
| 1300.239975 | 263.23787  | 5.94091E-06 | 0.007724611 |
| 1300.279975 | 237.366268 | 5.35703E-06 | 0.006965634 |
| 1300.319975 | 230.107777 | 5.19321E-06 | 0.006752837 |
| 1300.359975 | 234.613482 | 5.2949E-06  | 0.006885275 |
| 1300.399975 | 259.029461 | 5.84593E-06 | 0.007602053 |
| 1300.439975 | 252.125229 | 5.69012E-06 | 0.007399653 |
| 1300.479975 | 208.760738 | 4.71144E-06 | 0.006127132 |
| 1300.519975 | 191.712932 | 4.32669E-06 | 0.005626952 |
| 1300.559975 | 201.89683  | 4.55653E-06 | 0.005926041 |
| 1300.599975 | 200.672015 | 4.52889E-06 | 0.005890271 |
| 1300.639975 | 191.726302 | 4.327E-06   | 0.005627863 |
| 1300.679975 | 176.611501 | 3.98588E-06 | 0.005184349 |
| 1300.719975 | 174.466072 | 3.93746E-06 | 0.005121528 |
| 1300.759975 | 194.188193 | 4.38256E-06 | 0.005700655 |
| 1300.799975 | 207.33009  | 4.67915E-06 | 0.00608664  |
| 1300.839975 | 206.823021 | 4.66771E-06 | 0.006071941 |
| 1300.879975 | 210.358836 | 4.74751E-06 | 0.006175935 |
| 1300.919975 | 214.738882 | 4.84636E-06 | 0.006304723 |
| 1300.959975 | 218.93668  | 4.9411E-06  | 0.006428168 |
| 1300.999975 | 215.331616 | 4.85973E-06 | 0.006322515 |
| 1301.039975 | 219.526888 | 4.95442E-06 | 0.006445893 |
| 1301.079975 | 249.706464 | 5.63553E-06 | 0.007332271 |
| 1301.119975 | 254.828904 | 5.75113E-06 | 0.007482915 |
| 1301.159975 | 252.495976 | 5.69848E-06 | 0.007414637 |
| 1301.199975 | 251.783772 | 5.68241E-06 | 0.00739395  |
| 1301.239975 | 277.118202 | 6.25417E-06 | 0.008138178 |
| 1301.279975 | 315.905412 | 7.12955E-06 | 0.009277534 |
| 1301.319975 | 311.579626 | 7.03192E-06 | 0.009150776 |
| 1301.359975 | 285.311839 | 6.43909E-06 | 0.008379575 |
| 1301.399975 | 284.005259 | 6.4096E-06  | 0.008341457 |
| 1301.439975 | 249.533237 | 5.63162E-06 | 0.007329212 |
| 1301.479975 | 203.98226  | 4.6036E-06  | 0.005991487 |
| 1301.519975 | 187.42063  | 4.22982E-06 | 0.005505199 |
| 1301.559975 | 175.071238 | 3.95111E-06 | 0.005142612 |
| 1301.599975 | 180.875421 | 4.08211E-06 | 0.005313269 |
| 1301.639975 | 178.634106 | 4.03152E-06 | 0.005247591 |
| 1301.679975 | 153.692897 | 3.46863E-06 | 0.004515052 |
| 1301.719975 | 135.331837 | 3.05425E-06 | 0.00397578  |
| 1301.759975 | 155.735452 | 3.51473E-06 | 0.004575338 |
| 1301.799975 | 170.146981 | 3.83998E-06 | 0.004998886 |
| 1301.839975 | 166.200263 | 3.75091E-06 | 0.004883083 |

|             |            |             |             |
|-------------|------------|-------------|-------------|
| 1301.879975 | 176.081908 | 3.97392E-06 | 0.005173571 |
| 1301.919975 | 194.192597 | 4.38266E-06 | 0.005705868 |
| 1301.959975 | 195.049263 | 4.40199E-06 | 0.005731215 |
| 1301.999975 | 188.606237 | 4.25658E-06 | 0.005542067 |
| 1302.039975 | 191.330418 | 4.31806E-06 | 0.005622288 |
| 1302.079975 | 213.253706 | 4.81284E-06 | 0.006266701 |
| 1302.119975 | 228.941958 | 5.1669E-06  | 0.006727925 |
| 1302.159975 | 258.554612 | 5.83522E-06 | 0.007598387 |
| 1302.199975 | 277.18066  | 6.25558E-06 | 0.008146018 |
| 1302.239975 | 258.181002 | 5.82679E-06 | 0.007587873 |
| 1302.279975 | 266.508329 | 6.01472E-06 | 0.007832852 |
| 1302.319975 | 273.459679 | 6.1716E-06  | 0.008037403 |
| 1302.359975 | 242.518149 | 5.4733E-06  | 0.007128203 |
| 1302.399975 | 200.997585 | 4.53624E-06 | 0.005907993 |
| 1302.439975 | 199.63168  | 4.50541E-06 | 0.005868025 |
| 1302.479975 | 205.652278 | 4.64129E-06 | 0.006045181 |
| 1302.519975 | 181.527526 | 4.09682E-06 | 0.005336194 |
| 1302.559975 | 165.922254 | 3.74463E-06 | 0.004877611 |
| 1302.599975 | 158.922744 | 3.58666E-06 | 0.00467199  |
| 1302.639975 | 184.395702 | 4.16155E-06 | 0.005421007 |
| 1302.679975 | 214.102842 | 4.832E-06   | 0.006294553 |
| 1302.719975 | 201.836268 | 4.55516E-06 | 0.005934102 |
| 1302.759975 | 198.483663 | 4.4795E-06  | 0.005835713 |
| 1302.799975 | 203.80618  | 4.59962E-06 | 0.005992387 |
| 1302.839975 | 191.007101 | 4.31076E-06 | 0.005616236 |
| 1302.879975 | 185.934018 | 4.19627E-06 | 0.005467238 |
| 1302.919975 | 183.884842 | 4.15002E-06 | 0.00540715  |
| 1302.959975 | 179.395503 | 4.04871E-06 | 0.005275303 |
| 1302.999975 | 185.664339 | 4.19019E-06 | 0.005459812 |
| 1303.039975 | 216.454424 | 4.88507E-06 | 0.006365448 |
| 1303.079975 | 254.256576 | 5.73822E-06 | 0.007477355 |
| 1303.119975 | 262.661567 | 5.92791E-06 | 0.007724772 |
| 1303.159975 | 265.255854 | 5.98646E-06 | 0.007801309 |
| 1303.199975 | 278.549273 | 6.28647E-06 | 0.008192526 |
| 1303.239975 | 311.70452  | 7.03474E-06 | 0.00916795  |
| 1303.279975 | 349.646084 | 7.89103E-06 | 0.010284215 |
| 1303.319975 | 341.586444 | 7.70913E-06 | 0.010047463 |
| 1303.359975 | 296.906702 | 6.70077E-06 | 0.008733516 |
| 1303.399975 | 262.874134 | 5.9327E-06  | 0.007732685 |
| 1303.439975 | 241.925073 | 5.45991E-06 | 0.007116667 |
| 1303.479975 | 202.902549 | 4.57923E-06 | 0.005968932 |
| 1303.519975 | 192.878398 | 4.353E-06   | 0.005674218 |
| 1303.559975 | 197.475627 | 4.45675E-06 | 0.005809641 |
| 1303.599975 | 205.507272 | 4.63801E-06 | 0.006046113 |
| 1303.639975 | 190.216794 | 4.29293E-06 | 0.005596433 |
| 1303.679975 | 166.430001 | 3.75609E-06 | 0.004896744 |

|             |            |             |             |
|-------------|------------|-------------|-------------|
| 1303.719975 | 161.007818 | 3.63372E-06 | 0.004737356 |
| 1303.759975 | 163.577695 | 3.69172E-06 | 0.004813118 |
| 1303.799975 | 157.561562 | 3.55594E-06 | 0.004636241 |
| 1303.839975 | 177.794037 | 4.01256E-06 | 0.005231741 |
| 1303.879975 | 178.580745 | 4.03032E-06 | 0.005255052 |
| 1303.919975 | 171.090771 | 3.86128E-06 | 0.005034801 |
| 1303.959975 | 164.013028 | 3.70155E-06 | 0.004826667 |
| 1303.999975 | 164.092649 | 3.70334E-06 | 0.004829159 |
| 1304.039975 | 197.892723 | 4.46616E-06 | 0.005824055 |
| 1304.079975 | 217.539961 | 4.90957E-06 | 0.006402477 |
| 1304.119975 | 222.510089 | 5.02174E-06 | 0.006548955 |
| 1304.159975 | 225.233952 | 5.08322E-06 | 0.006629328 |
| 1304.199975 | 223.841016 | 5.05178E-06 | 0.006588531 |
| 1304.239975 | 221.29046  | 4.99422E-06 | 0.006513658 |
| 1304.279975 | 246.808722 | 5.57013E-06 | 0.007265008 |
| 1304.319975 | 288.109489 | 6.50223E-06 | 0.008480988 |
| 1304.359975 | 275.655563 | 6.22116E-06 | 0.008114635 |
| 1304.399975 | 230.997538 | 5.21329E-06 | 0.006800219 |
| 1304.439975 | 199.038786 | 4.49203E-06 | 0.005859581 |
| 1304.479975 | 182.038869 | 4.10836E-06 | 0.005359278 |
| 1304.519975 | 180.311358 | 4.06938E-06 | 0.005308583 |
| 1304.559975 | 164.532998 | 3.71328E-06 | 0.004844197 |
| 1304.599975 | 147.795676 | 3.33554E-06 | 0.004351549 |
| 1304.639975 | 165.817232 | 3.74226E-06 | 0.004882307 |
| 1304.679975 | 185.48658  | 4.18617E-06 | 0.005461617 |
| 1304.719975 | 208.345166 | 4.70206E-06 | 0.006134872 |
| 1304.759975 | 211.33688  | 4.76958E-06 | 0.006223156 |
| 1304.799975 | 200.435882 | 4.52356E-06 | 0.005902339 |
| 1304.839975 | 194.474684 | 4.38902E-06 | 0.005726972 |
| 1304.879975 | 203.95932  | 4.60308E-06 | 0.006006464 |
| 1304.919975 | 214.51408  | 4.84128E-06 | 0.006317488 |
| 1304.959975 | 213.045989 | 4.80815E-06 | 0.006274445 |
| 1304.999975 | 196.412982 | 4.43277E-06 | 0.005784761 |
| 1305.039975 | 182.64112  | 4.12196E-06 | 0.005379317 |
| 1305.079975 | 193.824113 | 4.37434E-06 | 0.005708864 |
| 1305.119975 | 223.140205 | 5.03596E-06 | 0.006572537 |
| 1305.159975 | 262.654847 | 5.92775E-06 | 0.007736667 |
| 1305.199975 | 308.027445 | 6.95175E-06 | 0.009073424 |
| 1305.239975 | 315.372814 | 7.11753E-06 | 0.009290078 |
| 1305.279975 | 302.565297 | 6.82848E-06 | 0.008913075 |
| 1305.319975 | 287.484533 | 6.48813E-06 | 0.00846908  |
| 1305.359975 | 284.021633 | 6.40997E-06 | 0.008367322 |
| 1305.399975 | 277.658927 | 6.26638E-06 | 0.008180126 |
| 1305.439975 | 237.797269 | 5.36675E-06 | 0.007005974 |
| 1305.479975 | 213.427728 | 4.81677E-06 | 0.006288192 |
| 1305.519975 | 186.30079  | 4.20455E-06 | 0.005489123 |

|             |            |             |             |
|-------------|------------|-------------|-------------|
| 1305.559975 | 172.715755 | 3.89795E-06 | 0.005089013 |
| 1305.599975 | 152.279655 | 3.43674E-06 | 0.004487007 |
| 1305.639975 | 136.020851 | 3.0698E-06  | 0.004008055 |
| 1305.679975 | 140.979281 | 3.18171E-06 | 0.00415429  |
| 1305.719975 | 154.945529 | 3.4969E-06  | 0.004565978 |
| 1305.759975 | 168.459995 | 3.80191E-06 | 0.004964379 |
| 1305.799975 | 171.140632 | 3.86241E-06 | 0.005043529 |
| 1305.839975 | 181.144361 | 4.08818E-06 | 0.005338504 |
| 1305.879975 | 183.60563  | 4.14372E-06 | 0.005411205 |
| 1305.919975 | 183.628587 | 4.14424E-06 | 0.005412048 |
| 1305.959975 | 203.65895  | 4.5963E-06  | 0.006002582 |
| 1305.999975 | 205.524723 | 4.63841E-06 | 0.006057759 |
| 1306.039975 | 190.322754 | 4.29532E-06 | 0.005609859 |
| 1306.079975 | 214.642293 | 4.84418E-06 | 0.006326883 |
| 1306.119975 | 259.939832 | 5.86648E-06 | 0.007662327 |
| 1306.159975 | 274.599369 | 6.19733E-06 | 0.008094698 |
| 1306.199975 | 290.155474 | 6.5484E-06  | 0.008553526 |
| 1306.239975 | 314.277135 | 7.0928E-06  | 0.009264895 |
| 1306.279975 | 357.331268 | 8.06447E-06 | 0.010534454 |
| 1306.319975 | 370.762684 | 8.3676E-06  | 0.01093076  |
| 1306.359975 | 358.799981 | 8.09762E-06 | 0.010578401 |
| 1306.399975 | 333.621491 | 7.52937E-06 | 0.009836372 |
| 1306.439975 | 284.212295 | 6.41428E-06 | 0.008379866 |
| 1306.479975 | 227.911693 | 5.14365E-06 | 0.006720075 |
| 1306.519975 | 174.083509 | 3.92882E-06 | 0.005133085 |
| 1306.559975 | 158.527149 | 3.57774E-06 | 0.004674528 |
| 1306.599975 | 182.139264 | 4.11063E-06 | 0.005370948 |
| 1306.639975 | 216.519543 | 4.88654E-06 | 0.006384954 |
| 1306.679975 | 228.124075 | 5.14844E-06 | 0.006727367 |
| 1306.719975 | 263.017504 | 5.93594E-06 | 0.00775661  |
| 1306.759975 | 290.219756 | 6.54986E-06 | 0.008559089 |
| 1306.799975 | 304.958728 | 6.88249E-06 | 0.008994043 |
| 1306.839975 | 324.233408 | 7.3175E-06  | 0.009562797 |
| 1306.879975 | 302.194057 | 6.8201E-06  | 0.008913051 |
| 1306.919975 | 246.660176 | 5.56678E-06 | 0.007275332 |
| 1306.959975 | 230.70071  | 5.20659E-06 | 0.00680481  |
| 1306.999975 | 255.703242 | 5.77087E-06 | 0.007542522 |
| 1307.039975 | 269.549934 | 6.08337E-06 | 0.007951203 |
| 1307.079975 | 285.329915 | 6.4395E-06  | 0.00841694  |
| 1307.119975 | 295.515811 | 6.66938E-06 | 0.00871768  |
| 1307.159975 | 296.976095 | 6.70234E-06 | 0.008761026 |
| 1307.199975 | 300.241602 | 6.77603E-06 | 0.008857632 |
| 1307.239975 | 326.93197  | 7.3784E-06  | 0.009645338 |
| 1307.279975 | 367.049406 | 8.28379E-06 | 0.010829238 |
| 1307.319975 | 373.94815  | 8.43949E-06 | 0.011033112 |
| 1307.359975 | 341.578533 | 7.70895E-06 | 0.010078375 |

|             |            |             |             |
|-------------|------------|-------------|-------------|
| 1307.399975 | 294.720428 | 6.65143E-06 | 0.008696079 |
| 1307.439975 | 248.753303 | 5.61402E-06 | 0.007339988 |
| 1307.479975 | 219.068345 | 4.94407E-06 | 0.006464269 |
| 1307.519975 | 186.526009 | 4.20963E-06 | 0.005504178 |
| 1307.559975 | 171.095502 | 3.86139E-06 | 0.005048995 |
| 1307.599975 | 184.08929  | 4.15464E-06 | 0.005432606 |
| 1307.639975 | 174.83223  | 3.94572E-06 | 0.005159581 |
| 1307.679975 | 168.392756 | 3.80039E-06 | 0.004969694 |
| 1307.719975 | 171.372023 | 3.86763E-06 | 0.005057774 |
| 1307.759975 | 199.666892 | 4.5062E-06  | 0.005893033 |
| 1307.799975 | 241.252835 | 5.44474E-06 | 0.007120631 |
| 1307.839975 | 243.350153 | 5.49207E-06 | 0.007182754 |
| 1307.879975 | 233.881171 | 5.27837E-06 | 0.006903477 |
| 1307.919975 | 212.6688   | 4.79964E-06 | 0.006277543 |
| 1307.959975 | 187.920822 | 4.24111E-06 | 0.005547204 |
| 1307.999975 | 187.055494 | 4.22158E-06 | 0.005521829 |
| 1308.039975 | 195.916056 | 4.42155E-06 | 0.005783567 |
| 1308.079975 | 207.550163 | 4.68412E-06 | 0.006127201 |
| 1308.119975 | 223.181038 | 5.03689E-06 | 0.00658885  |
| 1308.159975 | 251.189521 | 5.669E-06   | 0.007415956 |
| 1308.199975 | 288.373911 | 6.5082E-06  | 0.008514024 |
| 1308.239975 | 305.278501 | 6.88971E-06 | 0.009013395 |
| 1308.279975 | 309.026754 | 6.9743E-06  | 0.009124341 |
| 1308.319975 | 287.843138 | 6.49622E-06 | 0.008499133 |
| 1308.359975 | 258.587549 | 5.83596E-06 | 0.007635538 |
| 1308.399975 | 230.556768 | 5.20335E-06 | 0.006808057 |
| 1308.439975 | 216.269451 | 4.8809E-06  | 0.006386365 |
| 1308.479975 | 209.580737 | 4.72995E-06 | 0.006189039 |
| 1308.519975 | 209.572934 | 4.72977E-06 | 0.006188997 |
| 1308.559975 | 198.533199 | 4.48062E-06 | 0.005863157 |
| 1308.599975 | 181.332401 | 4.09242E-06 | 0.00535534  |
| 1308.639975 | 176.262069 | 3.97799E-06 | 0.005205756 |
| 1308.679975 | 199.314807 | 4.49826E-06 | 0.00588678  |
| 1308.719975 | 206.819758 | 4.66763E-06 | 0.006108626 |
| 1308.759975 | 195.965068 | 4.42266E-06 | 0.005788199 |
| 1308.799975 | 187.679743 | 4.23567E-06 | 0.005543645 |
| 1308.839975 | 188.990349 | 4.26525E-06 | 0.005582528 |
| 1308.879975 | 200.945226 | 4.53505E-06 | 0.005935841 |
| 1308.919975 | 206.671567 | 4.66429E-06 | 0.006105182 |
| 1308.959975 | 226.223559 | 5.10555E-06 | 0.006682961 |
| 1308.999975 | 231.395667 | 5.22228E-06 | 0.006835962 |
| 1309.039975 | 240.401759 | 5.42553E-06 | 0.007102239 |
| 1309.079975 | 269.116911 | 6.07359E-06 | 0.00795082  |
| 1309.119975 | 312.921139 | 7.06219E-06 | 0.00924526  |
| 1309.159975 | 323.366787 | 7.29794E-06 | 0.009554168 |
| 1309.199975 | 315.768733 | 7.12646E-06 | 0.009329962 |

|             |            |             |             |
|-------------|------------|-------------|-------------|
| 1309.239975 | 337.978954 | 7.62771E-06 | 0.009986508 |
| 1309.279975 | 331.38296  | 7.47885E-06 | 0.009791911 |
| 1309.319975 | 297.41748  | 6.7123E-06  | 0.008788546 |
| 1309.359975 | 277.451282 | 6.26169E-06 | 0.008198805 |
| 1309.399975 | 262.284201 | 5.91939E-06 | 0.007750848 |
| 1309.439975 | 226.750429 | 5.11744E-06 | 0.006700982 |
| 1309.479975 | 211.763028 | 4.7792E-06  | 0.006258262 |
| 1309.519975 | 200.510375 | 4.52524E-06 | 0.005925892 |
| 1309.559975 | 188.671707 | 4.25806E-06 | 0.005576182 |
| 1309.599975 | 181.708482 | 4.10091E-06 | 0.005370548 |
| 1309.639975 | 182.909275 | 4.12801E-06 | 0.005406204 |
| 1309.679975 | 196.66593  | 4.43848E-06 | 0.005812983 |
| 1309.719975 | 212.159342 | 4.78814E-06 | 0.006271124 |
| 1309.759975 | 210.102927 | 4.74173E-06 | 0.006210529 |
| 1309.799975 | 198.951354 | 4.49005E-06 | 0.005881074 |
| 1309.839975 | 178.639318 | 4.03164E-06 | 0.005280804 |
| 1309.879975 | 178.70214  | 4.03306E-06 | 0.005282822 |
| 1309.919975 | 190.18601  | 4.29223E-06 | 0.005622482 |
| 1309.959975 | 197.847235 | 4.46514E-06 | 0.00584915  |
| 1309.999975 | 193.765144 | 4.37301E-06 | 0.005728642 |
| 1310.039975 | 188.349515 | 4.25079E-06 | 0.0055687   |
| 1310.079975 | 187.992298 | 4.24272E-06 | 0.005558308 |
| 1310.119975 | 204.059447 | 4.60534E-06 | 0.006033545 |
| 1310.159975 | 248.070585 | 5.59861E-06 | 0.007335072 |
| 1310.199975 | 264.942142 | 5.97938E-06 | 0.007834177 |
| 1310.239975 | 262.384524 | 5.92165E-06 | 0.007758787 |
| 1310.279975 | 272.362707 | 6.14685E-06 | 0.00805409  |
| 1310.319975 | 283.113492 | 6.38948E-06 | 0.00837226  |
| 1310.359975 | 278.804836 | 6.29224E-06 | 0.008245095 |
| 1310.399975 | 269.640236 | 6.0854E-06  | 0.007974314 |
| 1310.439975 | 274.351162 | 6.19172E-06 | 0.008113882 |
| 1310.479975 | 241.536602 | 5.45114E-06 | 0.007143616 |
| 1310.519975 | 180.3682   | 4.07066E-06 | 0.00533468  |
| 1310.559975 | 151.71294  | 3.42395E-06 | 0.004487291 |
| 1310.599975 | 169.273761 | 3.82027E-06 | 0.00500685  |
| 1310.639975 | 186.096666 | 4.19994E-06 | 0.005504613 |
| 1310.679975 | 202.754232 | 4.57588E-06 | 0.005997515 |
| 1310.719975 | 203.496161 | 4.59262E-06 | 0.006019645 |
| 1310.759975 | 198.080727 | 4.47041E-06 | 0.005859629 |
| 1310.799975 | 203.430061 | 4.59113E-06 | 0.006018057 |
| 1310.839975 | 200.222358 | 4.51874E-06 | 0.005923345 |
| 1310.879975 | 186.340767 | 4.20545E-06 | 0.005512842 |
| 1310.919975 | 178.749546 | 4.03413E-06 | 0.005288419 |
| 1310.959975 | 197.34687  | 4.45384E-06 | 0.005838811 |
| 1310.999975 | 228.508504 | 5.15712E-06 | 0.006760982 |
| 1311.039975 | 248.431573 | 5.60675E-06 | 0.007350679 |



|             |            |             |             |
|-------------|------------|-------------|-------------|
| 1311.079975 | 250.177937 | 5.64617E-06 | 0.007402577 |
| 1311.119975 | 256.076603 | 5.77929E-06 | 0.007577346 |
| 1311.159975 | 301.565054 | 6.8059E-06  | 0.008923628 |
| 1311.199975 | 340.45914  | 7.68369E-06 | 0.010074852 |
| 1311.239975 | 350.708314 | 7.915E-06   | 0.010378462 |
| 1311.279975 | 330.40634  | 7.45681E-06 | 0.009777967 |
| 1311.319975 | 301.301363 | 6.79995E-06 | 0.008916913 |
| 1311.359975 | 288.321076 | 6.50701E-06 | 0.008533026 |
| 1311.399975 | 262.440555 | 5.92292E-06 | 0.007767314 |
| 1311.439975 | 252.329517 | 5.69473E-06 | 0.007468291 |
| 1311.479975 | 246.265616 | 5.55787E-06 | 0.007289038 |
| 1311.519975 | 226.764242 | 5.11775E-06 | 0.006712035 |
| 1311.559975 | 196.266058 | 4.42945E-06 | 0.005809491 |
| 1311.599975 | 171.355212 | 3.86725E-06 | 0.005072283 |
| 1311.639975 | 172.029921 | 3.88248E-06 | 0.00509241  |
| 1311.679975 | 173.528142 | 3.91629E-06 | 0.005136917 |
| 1311.719975 | 171.564869 | 3.87198E-06 | 0.005078954 |
| 1311.759975 | 172.427816 | 3.89146E-06 | 0.005104656 |
| 1311.799975 | 160.513289 | 3.62256E-06 | 0.004752076 |
| 1311.839975 | 160.574611 | 3.62395E-06 | 0.004754036 |
| 1311.879975 | 182.295571 | 4.11416E-06 | 0.00539728  |
| 1311.919975 | 188.242141 | 4.24836E-06 | 0.005573512 |
| 1311.959975 | 168.989115 | 3.81385E-06 | 0.005003617 |
| 1311.999975 | 162.6843   | 3.67156E-06 | 0.004817084 |
| 1312.039975 | 169.15861  | 3.81767E-06 | 0.005008941 |
| 1312.079975 | 184.432747 | 4.16239E-06 | 0.005461389 |
| 1312.119975 | 204.257991 | 4.60982E-06 | 0.006048635 |
| 1312.159975 | 228.383698 | 5.1543E-06  | 0.006763269 |
| 1312.199975 | 270.554892 | 6.10605E-06 | 0.008012355 |
| 1312.239975 | 293.726887 | 6.62901E-06 | 0.008698848 |
| 1312.279975 | 299.648611 | 6.76265E-06 | 0.008874493 |
| 1312.319975 | 299.31005  | 6.75501E-06 | 0.008864736 |
| 1312.359975 | 292.248435 | 6.59564E-06 | 0.008655854 |
| 1312.399975 | 254.951011 | 5.75389E-06 | 0.007551404 |
| 1312.439975 | 210.066874 | 4.74092E-06 | 0.006222169 |
| 1312.479975 | 203.342145 | 4.58915E-06 | 0.006023166 |
| 1312.519975 | 220.542733 | 4.97734E-06 | 0.006532861 |
| 1312.559975 | 190.355279 | 4.29605E-06 | 0.005638828 |
| 1312.599975 | 153.223557 | 3.45804E-06 | 0.004539026 |
| 1312.639975 | 147.285458 | 3.32403E-06 | 0.004363252 |
| 1312.679975 | 169.105711 | 3.81648E-06 | 0.005009817 |
| 1312.719975 | 215.823887 | 4.87084E-06 | 0.006394055 |
| 1312.759975 | 245.656961 | 5.54414E-06 | 0.007278119 |
| 1312.799975 | 240.774675 | 5.43395E-06 | 0.007133688 |
| 1312.839975 | 211.486342 | 4.77295E-06 | 0.006266122 |
| 1312.879975 | 180.238146 | 4.06772E-06 | 0.005340433 |

|             |            |             |             |
|-------------|------------|-------------|-------------|
| 1312.919975 | 174.312298 | 3.93399E-06 | 0.005165008 |
| 1312.959975 | 165.399814 | 3.73284E-06 | 0.004901074 |
| 1312.999975 | 165.02737  | 3.72444E-06 | 0.004890187 |
| 1313.039975 | 192.966912 | 4.35499E-06 | 0.005718282 |
| 1313.079975 | 234.716795 | 5.29723E-06 | 0.006955688 |
| 1313.119975 | 280.92793  | 6.34015E-06 | 0.00832538  |
| 1313.159975 | 318.932245 | 7.19786E-06 | 0.009451937 |
| 1313.199975 | 317.577494 | 7.16728E-06 | 0.009412074 |
| 1313.239975 | 293.825758 | 6.63124E-06 | 0.008708407 |
| 1313.279975 | 284.97466  | 6.43148E-06 | 0.008446335 |
| 1313.319975 | 270.394229 | 6.10242E-06 | 0.008014432 |
| 1313.359975 | 236.97701  | 5.34824E-06 | 0.007024166 |
| 1313.399975 | 232.294784 | 5.24257E-06 | 0.006885591 |
| 1313.439975 | 234.455481 | 5.29133E-06 | 0.006949849 |
| 1313.479975 | 242.890457 | 5.4817E-06  | 0.007200102 |
| 1313.519975 | 237.093615 | 5.35087E-06 | 0.007028478 |
| 1313.559975 | 203.805113 | 4.5996E-06  | 0.006041847 |
| 1313.599975 | 176.99782  | 3.99459E-06 | 0.005247299 |
| 1313.639975 | 169.127377 | 3.81697E-06 | 0.005014123 |
| 1313.679975 | 172.453026 | 3.89202E-06 | 0.005112875 |
| 1313.719975 | 169.023841 | 3.81463E-06 | 0.005011359 |
| 1313.759975 | 166.346207 | 3.7542E-06  | 0.004932121 |
| 1313.799975 | 171.103969 | 3.86158E-06 | 0.005073341 |
| 1313.839975 | 189.69358  | 4.28112E-06 | 0.005624706 |
| 1313.879975 | 203.446665 | 4.59151E-06 | 0.00603269  |
| 1313.919975 | 184.043646 | 4.15361E-06 | 0.005457509 |
| 1313.959975 | 173.415296 | 3.91374E-06 | 0.0051425   |
| 1313.999975 | 191.988507 | 4.33291E-06 | 0.005693448 |
| 1314.039975 | 205.062808 | 4.62798E-06 | 0.006081353 |
| 1314.079975 | 207.930847 | 4.69271E-06 | 0.006166596 |
| 1314.119975 | 220.223819 | 4.97014E-06 | 0.006531367 |
| 1314.159975 | 243.59452  | 5.49759E-06 | 0.007224711 |
| 1314.199975 | 264.453354 | 5.96834E-06 | 0.007843597 |
| 1314.239975 | 287.260406 | 6.48307E-06 | 0.008520306 |
| 1314.279975 | 296.872637 | 6.7E-06     | 0.008805678 |
| 1314.319975 | 286.426321 | 6.46424E-06 | 0.008496084 |
| 1314.359975 | 267.046107 | 6.02686E-06 | 0.007921462 |
| 1314.399975 | 238.259783 | 5.37719E-06 | 0.00706778  |
| 1314.439975 | 221.970587 | 5.00957E-06 | 0.006584775 |
| 1314.479975 | 213.747633 | 4.82399E-06 | 0.006341033 |
| 1314.519975 | 212.278053 | 4.79082E-06 | 0.006297629 |
| 1314.559975 | 205.401012 | 4.63561E-06 | 0.006093794 |
| 1314.599975 | 194.475469 | 4.38904E-06 | 0.005769832 |
| 1314.639975 | 200.895059 | 4.53392E-06 | 0.005960475 |
| 1314.679975 | 233.135307 | 5.26154E-06 | 0.00691724  |
| 1314.719975 | 265.820066 | 5.99919E-06 | 0.007887253 |

|             |             |             |             |
|-------------|-------------|-------------|-------------|
| 1314.759975 | 275.439096  | 6.21628E-06 | 0.008172912 |
| 1314.799975 | 294.488802  | 6.6462E-06  | 0.008738426 |
| 1314.839975 | 323.558906  | 7.30227E-06 | 0.009601322 |
| 1314.879975 | 331.191631  | 7.47453E-06 | 0.009828115 |
| 1314.919975 | 353.948831  | 7.98813E-06 | 0.010503754 |
| 1314.959975 | 399.279504  | 9.01118E-06 | 0.011849344 |
| 1314.999975 | 450.965236  | 1.01777E-05 | 0.013383619 |
| 1315.039975 | 514.61202   | 1.16141E-05 | 0.015272975 |
| 1315.079975 | 600.371982  | 1.35496E-05 | 0.017818754 |
| 1315.119975 | 716.782366  | 1.61768E-05 | 0.021274406 |
| 1315.159975 | 857.115127  | 1.93439E-05 | 0.025440316 |
| 1315.199975 | 1030.170528 | 2.32495E-05 | 0.03057776  |
| 1315.239975 | 1228.095451 | 2.77164E-05 | 0.036453722 |
| 1315.279975 | 1390.472234 | 3.1381E-05  | 0.041274829 |
| 1315.319975 | 1455.269669 | 3.28434E-05 | 0.043199592 |
| 1315.359975 | 1413.843774 | 3.19085E-05 | 0.041971144 |
| 1315.399975 | 1262.834935 | 2.85004E-05 | 0.037489459 |
| 1315.439975 | 1031.530996 | 2.32802E-05 | 0.030623729 |
| 1315.479975 | 733.561115  | 1.65555E-05 | 0.021778366 |
| 1315.519975 | 481.561287  | 1.08682E-05 | 0.014297291 |
| 1315.559975 | 329.30999   | 7.43207E-06 | 0.009777331 |
| 1315.599975 | 248.554536  | 5.60953E-06 | 0.007379897 |
| 1315.639975 | 242.309363  | 5.46858E-06 | 0.007194689 |
| 1315.679975 | 250.459932  | 5.65253E-06 | 0.007436923 |
| 1315.719975 | 244.797823  | 5.52475E-06 | 0.007269019 |
| 1315.759975 | 244.730185  | 5.52322E-06 | 0.007267231 |
| 1315.799975 | 254.462959  | 5.74287E-06 | 0.007556474 |
| 1315.839975 | 247.377983  | 5.58298E-06 | 0.007346304 |
| 1315.879975 | 232.63382   | 5.25022E-06 | 0.006908661 |
| 1315.919975 | 235.354236  | 5.31162E-06 | 0.006989663 |
| 1315.959975 | 267.484274  | 6.03675E-06 | 0.007944118 |
| 1315.999975 | 339.708409  | 7.66675E-06 | 0.010089437 |
| 1316.039975 | 393.150285  | 8.87285E-06 | 0.011677031 |
| 1316.079975 | 417.475962  | 9.42185E-06 | 0.012399909 |
| 1316.119975 | 471.50991   | 1.06413E-05 | 0.014005256 |
| 1316.159975 | 573.751966  | 1.29488E-05 | 0.01704267  |
| 1316.199975 | 645.660222  | 1.45717E-05 | 0.019179208 |
| 1316.239975 | 726.506185  | 1.63962E-05 | 0.021581377 |
| 1316.279975 | 805.592162  | 1.81811E-05 | 0.023931409 |
| 1316.319975 | 867.304984  | 1.95739E-05 | 0.02576547  |
| 1316.359975 | 837.06442   | 1.88914E-05 | 0.024867854 |
| 1316.399975 | 720.320949  | 1.62566E-05 | 0.021400241 |
| 1316.439975 | 583.579749  | 1.31706E-05 | 0.017338281 |
| 1316.479975 | 460.492479  | 1.03927E-05 | 0.013681747 |
| 1316.519975 | 339.138784  | 7.65389E-06 | 0.010076499 |
| 1316.559975 | 256.530778  | 5.78954E-06 | 0.00762228  |

|             |            |             |             |
|-------------|------------|-------------|-------------|
| 1316.599975 | 226.773476 | 5.11796E-06 | 0.006738308 |
| 1316.639975 | 200.474085 | 4.52442E-06 | 0.005957033 |
| 1316.679975 | 185.126626 | 4.17805E-06 | 0.005501155 |
| 1316.719975 | 194.192166 | 4.38265E-06 | 0.005770718 |
| 1316.759975 | 210.219922 | 4.74437E-06 | 0.006247198 |
| 1316.799975 | 219.757536 | 4.95962E-06 | 0.006530829 |
| 1316.839975 | 254.981674 | 5.75458E-06 | 0.007577863 |
| 1316.879975 | 272.200562 | 6.14319E-06 | 0.008089841 |
| 1316.919975 | 258.20516  | 5.82733E-06 | 0.007674128 |
| 1316.959975 | 229.136006 | 5.17128E-06 | 0.006810369 |
| 1316.999975 | 204.493274 | 4.61513E-06 | 0.006078124 |
| 1317.039975 | 243.072524 | 5.48581E-06 | 0.007225029 |
| 1317.079975 | 284.896294 | 6.42971E-06 | 0.008468446 |
| 1317.119975 | 322.91013  | 7.28763E-06 | 0.009598685 |
| 1317.159975 | 366.221843 | 8.26512E-06 | 0.010886481 |
| 1317.199975 | 406.201055 | 9.16739E-06 | 0.012075289 |
| 1317.239975 | 455.889915 | 1.02888E-05 | 0.013552819 |
| 1317.279975 | 513.438014 | 1.15876E-05 | 0.015264088 |
| 1317.319975 | 564.005656 | 1.27288E-05 | 0.016767932 |
| 1317.359975 | 552.543263 | 1.24701E-05 | 0.016427653 |
| 1317.399975 | 465.557397 | 1.0507E-05  | 0.013841898 |
| 1317.439975 | 370.204168 | 8.35499E-06 | 0.011007201 |
| 1317.479975 | 291.124915 | 6.57028E-06 | 0.008656217 |
| 1317.519975 | 229.169686 | 5.17204E-06 | 0.006814267 |
| 1317.559975 | 197.674807 | 4.46125E-06 | 0.005877958 |
| 1317.599975 | 185.219048 | 4.18014E-06 | 0.005507747 |
| 1317.639975 | 168.541866 | 3.80376E-06 | 0.00501198  |
| 1317.679975 | 157.689892 | 3.55884E-06 | 0.004689414 |
| 1317.719975 | 163.308203 | 3.68564E-06 | 0.00485664  |
| 1317.759975 | 182.960853 | 4.12917E-06 | 0.005441257 |
| 1317.799975 | 186.626198 | 4.21189E-06 | 0.005550433 |
| 1317.839975 | 200.55934  | 4.52634E-06 | 0.005964998 |
| 1317.879975 | 219.833794 | 4.96134E-06 | 0.006538454 |
| 1317.919975 | 201.361212 | 4.54444E-06 | 0.005989211 |
| 1317.959975 | 193.266205 | 4.36175E-06 | 0.005748611 |
| 1317.999975 | 214.198949 | 4.83417E-06 | 0.006371438 |
| 1318.039975 | 196.279059 | 4.42974E-06 | 0.005838581 |
| 1318.079975 | 192.897335 | 4.35342E-06 | 0.005738161 |
| 1318.119975 | 226.783979 | 5.1182E-06  | 0.0067464   |
| 1318.159975 | 259.492182 | 5.85638E-06 | 0.007719642 |
| 1318.199975 | 299.51759  | 6.75969E-06 | 0.00891063  |
| 1318.239975 | 328.251983 | 7.40819E-06 | 0.009765772 |
| 1318.279975 | 337.292103 | 7.61221E-06 | 0.010035028 |
| 1318.319975 | 328.168551 | 7.40631E-06 | 0.009763883 |
| 1318.359975 | 316.674839 | 7.14691E-06 | 0.0094222   |
| 1318.399975 | 294.553078 | 6.64765E-06 | 0.008764265 |

|             |            |             |             |
|-------------|------------|-------------|-------------|
| 1318.439975 | 281.843539 | 6.36082E-06 | 0.008386354 |
| 1318.479975 | 265.974617 | 6.00268E-06 | 0.007914409 |
| 1318.519975 | 227.986474 | 5.14534E-06 | 0.00678423  |
| 1318.559975 | 188.063982 | 4.24434E-06 | 0.00559642  |
| 1318.599975 | 178.610282 | 4.03099E-06 | 0.005315257 |
| 1318.639975 | 180.803094 | 4.08047E-06 | 0.005380676 |
| 1318.679975 | 177.229208 | 3.99982E-06 | 0.005274478 |
| 1318.719975 | 201.643129 | 4.5508E-06  | 0.006001237 |
| 1318.759975 | 242.716013 | 5.47776E-06 | 0.007223854 |
| 1318.799975 | 245.095379 | 5.53146E-06 | 0.007294891 |
| 1318.839975 | 228.260188 | 5.15151E-06 | 0.006794023 |
| 1318.879975 | 210.941637 | 4.76066E-06 | 0.006278738 |
| 1318.919975 | 198.208198 | 4.47328E-06 | 0.005899902 |
| 1318.959975 | 177.860018 | 4.01405E-06 | 0.005294375 |
| 1318.999975 | 199.40862  | 4.50037E-06 | 0.005935994 |
| 1319.039975 | 238.587465 | 5.38459E-06 | 0.007102485 |
| 1319.079975 | 238.318581 | 5.37852E-06 | 0.007094696 |
| 1319.119975 | 241.532241 | 5.45105E-06 | 0.007190584 |
| 1319.159975 | 251.887155 | 5.68474E-06 | 0.007499084 |
| 1319.199975 | 279.871393 | 6.31631E-06 | 0.008332473 |
| 1319.239975 | 309.575641 | 6.98669E-06 | 0.009217122 |
| 1319.279975 | 303.692468 | 6.85392E-06 | 0.009042234 |
| 1319.319975 | 286.002338 | 6.45467E-06 | 0.008515781 |
| 1319.359975 | 275.065771 | 6.20785E-06 | 0.008190391 |
| 1319.399975 | 266.600456 | 6.0168E-06  | 0.007938567 |
| 1319.439975 | 251.09944  | 5.66696E-06 | 0.00747722  |
| 1319.479975 | 222.393575 | 5.01911E-06 | 0.006622619 |
| 1319.519975 | 210.084982 | 4.74133E-06 | 0.006256274 |
| 1319.559975 | 212.399841 | 4.79357E-06 | 0.006325401 |
| 1319.599975 | 206.905069 | 4.66956E-06 | 0.00616195  |
| 1319.639975 | 182.915048 | 4.12814E-06 | 0.005447656 |
| 1319.679975 | 164.640298 | 3.7157E-06  | 0.004903538 |
| 1319.719975 | 171.123324 | 3.86202E-06 | 0.005096778 |
| 1319.759975 | 183.673061 | 4.14525E-06 | 0.005470729 |
| 1319.799975 | 191.967885 | 4.33245E-06 | 0.005717964 |
| 1319.839975 | 193.780344 | 4.37335E-06 | 0.005772125 |
| 1319.879975 | 202.505994 | 4.57028E-06 | 0.006032219 |
| 1319.919975 | 206.647286 | 4.66374E-06 | 0.006155765 |
| 1319.959975 | 208.256436 | 4.70006E-06 | 0.006203888 |
| 1319.999975 | 208.442577 | 4.70426E-06 | 0.006209621 |
| 1320.039975 | 192.108124 | 4.33561E-06 | 0.005723182 |
| 1320.079975 | 188.08325  | 4.24478E-06 | 0.005603445 |
| 1320.119975 | 212.110271 | 4.78703E-06 | 0.006319458 |
| 1320.159975 | 248.60088  | 5.61058E-06 | 0.007406857 |
| 1320.199975 | 244.368202 | 5.51505E-06 | 0.007280969 |
| 1320.239975 | 232.886091 | 5.25591E-06 | 0.006939069 |

|             |            |             |             |
|-------------|------------|-------------|-------------|
| 1320.279975 | 252.449807 | 5.69744E-06 | 0.007522217 |
| 1320.319975 | 270.414577 | 6.10288E-06 | 0.008057755 |
| 1320.359975 | 271.236342 | 6.12143E-06 | 0.008082486 |
| 1320.399975 | 242.19791  | 5.46607E-06 | 0.007217398 |
| 1320.439975 | 225.226304 | 5.08304E-06 | 0.006711854 |
| 1320.479975 | 203.160855 | 4.58506E-06 | 0.006054477 |
| 1320.519975 | 185.327932 | 4.18259E-06 | 0.005523198 |
| 1320.559975 | 174.655124 | 3.94172E-06 | 0.005205281 |
| 1320.599975 | 163.321873 | 3.68595E-06 | 0.004867662 |
| 1320.639975 | 154.752334 | 3.49254E-06 | 0.004612394 |
| 1320.679975 | 157.856296 | 3.5626E-06  | 0.00470505  |
| 1320.719975 | 165.191424 | 3.72814E-06 | 0.004923829 |
| 1320.759975 | 166.810249 | 3.76467E-06 | 0.004972232 |
| 1320.799975 | 164.522554 | 3.71304E-06 | 0.00490419  |
| 1320.839975 | 180.640905 | 4.07681E-06 | 0.005384818 |
| 1320.879975 | 190.765867 | 4.30532E-06 | 0.005686811 |
| 1320.919975 | 190.969041 | 4.30991E-06 | 0.00569304  |
| 1320.959975 | 202.823316 | 4.57744E-06 | 0.006046615 |
| 1320.999975 | 202.712436 | 4.57494E-06 | 0.006043492 |
| 1321.039975 | 207.099329 | 4.67394E-06 | 0.006174466 |
| 1321.079975 | 211.082674 | 4.76384E-06 | 0.006293416 |
| 1321.119975 | 226.865328 | 5.12003E-06 | 0.00676418  |
| 1321.159975 | 265.053039 | 5.98188E-06 | 0.007903018 |
| 1321.199975 | 287.51811  | 6.48888E-06 | 0.008573112 |
| 1321.239975 | 302.157142 | 6.81927E-06 | 0.009009887 |
| 1321.279975 | 304.34325  | 6.8686E-06  | 0.009075348 |
| 1321.319975 | 309.373431 | 6.98213E-06 | 0.009225624 |
| 1321.359975 | 288.484052 | 6.51068E-06 | 0.008602956 |
| 1321.399975 | 241.315665 | 5.44616E-06 | 0.007196554 |
| 1321.439975 | 233.034683 | 5.25927E-06 | 0.006949807 |
| 1321.479975 | 229.021081 | 5.16869E-06 | 0.006830316 |
| 1321.519975 | 244.496719 | 5.51795E-06 | 0.007292082 |
| 1321.559975 | 223.949622 | 5.05423E-06 | 0.006679469 |
| 1321.599975 | 171.996043 | 3.88171E-06 | 0.005130069 |
| 1321.639975 | 164.039244 | 3.70214E-06 | 0.004892893 |
| 1321.679975 | 179.055003 | 4.04102E-06 | 0.005340938 |
| 1321.719975 | 206.177617 | 4.65314E-06 | 0.00615015  |
| 1321.759975 | 215.473712 | 4.86294E-06 | 0.006427642 |
| 1321.799975 | 201.596315 | 4.54975E-06 | 0.006013857 |
| 1321.839975 | 203.611752 | 4.59523E-06 | 0.006074164 |
| 1321.879975 | 197.573924 | 4.45897E-06 | 0.005894221 |
| 1321.919975 | 190.322277 | 4.29531E-06 | 0.005678054 |
| 1321.959975 | 188.214315 | 4.24773E-06 | 0.005615336 |
| 1321.999975 | 172.546815 | 3.89414E-06 | 0.005148055 |
| 1322.039975 | 179.861238 | 4.05922E-06 | 0.005366448 |
| 1322.079975 | 200.892516 | 4.53386E-06 | 0.005994131 |

|             |            |             |             |
|-------------|------------|-------------|-------------|
| 1322.119975 | 223.562954 | 5.0455E-06  | 0.006670762 |
| 1322.159975 | 247.198558 | 5.57893E-06 | 0.007376234 |
| 1322.199975 | 255.623996 | 5.76908E-06 | 0.007627874 |
| 1322.239975 | 277.086645 | 6.25346E-06 | 0.008268574 |
| 1322.279975 | 308.495787 | 6.96232E-06 | 0.009206137 |
| 1322.319975 | 318.443102 | 7.18682E-06 | 0.009503272 |
| 1322.359975 | 299.830124 | 6.76675E-06 | 0.008948077 |
| 1322.399975 | 258.71484  | 5.83883E-06 | 0.007721273 |
| 1322.439975 | 236.85629  | 5.34552E-06 | 0.007069125 |
| 1322.479975 | 234.87743  | 5.30086E-06 | 0.007010276 |
| 1322.519975 | 235.284579 | 5.31005E-06 | 0.007022641 |
| 1322.559975 | 216.597488 | 4.8883E-06  | 0.006465075 |
| 1322.599975 | 188.818255 | 4.26137E-06 | 0.005636081 |
| 1322.639975 | 178.240245 | 4.02263E-06 | 0.005320497 |
| 1322.679975 | 168.850193 | 3.81071E-06 | 0.005040355 |
| 1322.719975 | 179.134965 | 4.04283E-06 | 0.005347528 |
| 1322.759975 | 220.678266 | 4.9804E-06  | 0.006587875 |
| 1322.799975 | 236.880771 | 5.34607E-06 | 0.00707178  |
| 1322.839975 | 232.732941 | 5.25246E-06 | 0.006948162 |
| 1322.879975 | 226.847307 | 5.11963E-06 | 0.006772653 |
| 1322.919975 | 225.621125 | 5.09195E-06 | 0.006736248 |
| 1322.959975 | 217.153631 | 4.90085E-06 | 0.006483635 |
| 1322.999975 | 204.998206 | 4.62652E-06 | 0.006120891 |
| 1323.039975 | 201.06491  | 4.53775E-06 | 0.006003631 |
| 1323.079975 | 208.728803 | 4.71072E-06 | 0.006232657 |
| 1323.119975 | 204.260443 | 4.60987E-06 | 0.006099416 |
| 1323.159975 | 215.001637 | 4.85229E-06 | 0.006420353 |
| 1323.199975 | 256.773281 | 5.79502E-06 | 0.007667964 |
| 1323.239975 | 286.589352 | 6.46792E-06 | 0.008558614 |
| 1323.279975 | 294.57699  | 6.64819E-06 | 0.00879742  |
| 1323.319975 | 284.384668 | 6.41817E-06 | 0.008493287 |
| 1323.359975 | 275.780466 | 6.22398E-06 | 0.008236567 |
| 1323.399975 | 260.449434 | 5.87798E-06 | 0.00777892  |
| 1323.439975 | 231.831554 | 5.23212E-06 | 0.00692439  |
| 1323.479975 | 210.454856 | 4.74967E-06 | 0.006286097 |
| 1323.519975 | 184.611616 | 4.16643E-06 | 0.005514349 |
| 1323.559975 | 170.016169 | 3.83703E-06 | 0.005078537 |
| 1323.599975 | 144.291451 | 3.25646E-06 | 0.004310246 |
| 1323.639975 | 141.800717 | 3.20024E-06 | 0.004235972 |
| 1323.679975 | 157.76094  | 3.56044E-06 | 0.004712889 |
| 1323.719975 | 174.991594 | 3.94932E-06 | 0.005227789 |
| 1323.759975 | 186.957447 | 4.21937E-06 | 0.005585432 |
| 1323.799975 | 186.754515 | 4.21479E-06 | 0.005579538 |
| 1323.839975 | 171.443975 | 3.86925E-06 | 0.00512227  |
| 1323.879975 | 145.807576 | 3.29067E-06 | 0.004356457 |
| 1323.919975 | 141.57848  | 3.19523E-06 | 0.004230228 |

|             |            |             |             |
|-------------|------------|-------------|-------------|
| 1323.959975 | 159.296795 | 3.59511E-06 | 0.004759777 |
| 1323.999975 | 167.043889 | 3.76995E-06 | 0.004991411 |
| 1324.039975 | 176.702    | 3.98792E-06 | 0.005280163 |
| 1324.079975 | 182.225522 | 4.11258E-06 | 0.00544538  |
| 1324.119975 | 195.046353 | 4.40192E-06 | 0.005828676 |
| 1324.159975 | 203.619931 | 4.59542E-06 | 0.006085069 |
| 1324.199975 | 218.741806 | 4.9367E-06  | 0.006537175 |
| 1324.239975 | 254.26427  | 5.73839E-06 | 0.007599006 |
| 1324.279975 | 273.862696 | 6.1807E-06  | 0.008184977 |
| 1324.319975 | 265.01367  | 5.98099E-06 | 0.007920744 |
| 1324.359975 | 250.585933 | 5.65538E-06 | 0.007489753 |
| 1324.399975 | 244.846882 | 5.52585E-06 | 0.00731844  |
| 1324.439975 | 235.162791 | 5.3073E-06  | 0.007029196 |
| 1324.479975 | 219.405332 | 4.95167E-06 | 0.006558391 |
| 1324.519975 | 198.630957 | 4.48282E-06 | 0.00593759  |
| 1324.559975 | 166.267027 | 3.75242E-06 | 0.004970299 |
| 1324.599975 | 142.804136 | 3.22289E-06 | 0.004269041 |
| 1324.639975 | 143.12376  | 3.2301E-06  | 0.004278725 |
| 1324.679975 | 155.305401 | 3.50503E-06 | 0.004643039 |
| 1324.719975 | 179.732066 | 4.0563E-06  | 0.005373465 |
| 1324.759975 | 201.561457 | 4.54896E-06 | 0.006026282 |
| 1324.799975 | 206.435593 | 4.65896E-06 | 0.006172195 |
| 1324.839975 | 219.23766  | 4.94789E-06 | 0.006555161 |
| 1324.879975 | 210.452607 | 4.74962E-06 | 0.006292679 |
| 1324.919975 | 190.025163 | 4.2886E-06  | 0.005682056 |
| 1324.959975 | 179.337911 | 4.04741E-06 | 0.005362652 |
| 1324.999975 | 178.964289 | 4.03897E-06 | 0.005351641 |
| 1325.039975 | 180.92135  | 4.08314E-06 | 0.005410328 |
| 1325.079975 | 201.681702 | 4.55168E-06 | 0.006031334 |
| 1325.119975 | 250.812334 | 5.66049E-06 | 0.007500822 |
| 1325.159975 | 272.155853 | 6.14218E-06 | 0.008139369 |
| 1325.199975 | 285.498831 | 6.44331E-06 | 0.008538676 |
| 1325.239975 | 320.840685 | 7.24093E-06 | 0.009595966 |
| 1325.279975 | 344.448853 | 7.77373E-06 | 0.01030237  |
| 1325.319975 | 345.18217  | 7.79028E-06 | 0.010324615 |
| 1325.359975 | 303.755268 | 6.85533E-06 | 0.009085784 |
| 1325.399975 | 261.472999 | 5.90108E-06 | 0.007821293 |
| 1325.439975 | 228.930712 | 5.16665E-06 | 0.006848081 |
| 1325.479975 | 202.329319 | 4.56629E-06 | 0.006052527 |
| 1325.519975 | 183.274957 | 4.13626E-06 | 0.005482696 |
| 1325.559975 | 171.519654 | 3.87096E-06 | 0.005131189 |
| 1325.599975 | 150.695615 | 3.40099E-06 | 0.004508352 |
| 1325.639975 | 159.511004 | 3.59994E-06 | 0.004772226 |
| 1325.679975 | 170.761979 | 3.85386E-06 | 0.005108985 |
| 1325.719975 | 159.576871 | 3.60143E-06 | 0.004774485 |
| 1325.759975 | 141.928879 | 3.20314E-06 | 0.004246591 |



|             |            |             |             |
|-------------|------------|-------------|-------------|
| 1325.799975 | 148.333866 | 3.34769E-06 | 0.004438366 |
| 1325.839975 | 181.20183  | 4.08947E-06 | 0.005421987 |
| 1325.879975 | 199.541683 | 4.50338E-06 | 0.005970939 |
| 1325.919975 | 196.207044 | 4.42812E-06 | 0.005871332 |
| 1325.959975 | 200.1445   | 4.51698E-06 | 0.005989338 |
| 1325.999975 | 200.449739 | 4.52387E-06 | 0.005998653 |
| 1326.039975 | 187.126219 | 4.22318E-06 | 0.005600103 |
| 1326.079975 | 188.426595 | 4.25253E-06 | 0.005639189 |
| 1326.119975 | 186.670939 | 4.2129E-06  | 0.005586815 |
| 1326.159975 | 196.614125 | 4.43731E-06 | 0.005884579 |
| 1326.199975 | 244.672103 | 5.52191E-06 | 0.007323155 |
| 1326.239975 | 298.348899 | 6.73332E-06 | 0.008929997 |
| 1326.279975 | 321.657366 | 7.25936E-06 | 0.009627942 |
| 1326.319975 | 313.177277 | 7.06797E-06 | 0.009374396 |
| 1326.359975 | 267.727239 | 6.04223E-06 | 0.008014173 |
| 1326.399975 | 241.397185 | 5.448E-06   | 0.007226225 |
| 1326.439975 | 228.218448 | 5.15057E-06 | 0.006831925 |
| 1326.479975 | 210.963638 | 4.76116E-06 | 0.006315577 |
| 1326.519975 | 195.272666 | 4.40703E-06 | 0.005846016 |
| 1326.559975 | 191.499954 | 4.32189E-06 | 0.005733243 |
| 1326.599975 | 184.445945 | 4.16269E-06 | 0.005522222 |
| 1326.639975 | 178.620141 | 4.03121E-06 | 0.005347961 |
| 1326.679975 | 185.976715 | 4.19724E-06 | 0.005568388 |
| 1326.719975 | 183.420311 | 4.13954E-06 | 0.005492012 |
| 1326.759975 | 180.865704 | 4.08189E-06 | 0.005415684 |
| 1326.799975 | 192.497111 | 4.34439E-06 | 0.005764139 |
| 1326.839975 | 198.935676 | 4.4897E-06  | 0.005957115 |
| 1326.879975 | 186.703271 | 4.21363E-06 | 0.005590985 |
| 1326.919975 | 176.192948 | 3.97643E-06 | 0.005276404 |
| 1326.959975 | 167.65726  | 3.78379E-06 | 0.005020939 |
| 1326.999975 | 171.901968 | 3.87959E-06 | 0.005148213 |
| 1327.039975 | 181.114294 | 4.0875E-06  | 0.005424272 |
| 1327.079975 | 207.268681 | 4.67777E-06 | 0.006207769 |
| 1327.119975 | 231.34498  | 5.22113E-06 | 0.006929071 |
| 1327.159975 | 251.988316 | 5.68703E-06 | 0.007547592 |
| 1327.199975 | 267.136078 | 6.02889E-06 | 0.008001542 |
| 1327.239975 | 289.292718 | 6.52893E-06 | 0.008665462 |
| 1327.279975 | 306.709887 | 6.92201E-06 | 0.009187452 |
| 1327.319975 | 326.546357 | 7.3697E-06  | 0.009781945 |
| 1327.359975 | 334.17864  | 7.54195E-06 | 0.010010878 |
| 1327.399975 | 301.011213 | 6.7934E-06  | 0.009017564 |
| 1327.439975 | 246.904473 | 5.57229E-06 | 0.007396881 |
| 1327.479975 | 214.872315 | 4.84937E-06 | 0.00643744  |
| 1327.519975 | 197.381794 | 4.45463E-06 | 0.005913613 |
| 1327.559975 | 181.255429 | 4.09068E-06 | 0.005430626 |
| 1327.599975 | 175.943415 | 3.9708E-06  | 0.005271631 |

|             |            |             |             |
|-------------|------------|-------------|-------------|
| 1327.639975 | 181.824319 | 4.10352E-06 | 0.005447999 |
| 1327.679975 | 188.498126 | 4.25414E-06 | 0.005648137 |
| 1327.719975 | 179.992335 | 4.06218E-06 | 0.005393433 |
| 1327.759975 | 169.153547 | 3.81756E-06 | 0.005068803 |
| 1327.799975 | 169.364368 | 3.82232E-06 | 0.005075274 |
| 1327.839975 | 173.072754 | 3.90601E-06 | 0.005186558 |
| 1327.879975 | 170.070525 | 3.83825E-06 | 0.005096742 |
| 1327.919975 | 160.458475 | 3.62132E-06 | 0.004808829 |
| 1327.959975 | 139.762671 | 3.15425E-06 | 0.004188716 |
| 1327.999975 | 170.492798 | 3.84778E-06 | 0.005109858 |
| 1328.039975 | 230.81659  | 5.20921E-06 | 0.006918038 |
| 1328.079975 | 229.461631 | 5.17863E-06 | 0.006877634 |
| 1328.119975 | 225.192692 | 5.08229E-06 | 0.006749885 |
| 1328.159975 | 237.91276  | 5.36936E-06 | 0.007131369 |
| 1328.199975 | 241.326197 | 5.4464E-06  | 0.007233903 |
| 1328.239975 | 271.201781 | 6.12065E-06 | 0.008129687 |
| 1328.279975 | 280.995856 | 6.34169E-06 | 0.008423533 |
| 1328.319975 | 273.288766 | 6.16775E-06 | 0.008192741 |
| 1328.359975 | 256.556045 | 5.79011E-06 | 0.007691354 |
| 1328.399975 | 216.124498 | 4.87763E-06 | 0.006479442 |
| 1328.439975 | 192.502574 | 4.34451E-06 | 0.005771427 |
| 1328.479975 | 182.759559 | 4.12463E-06 | 0.005479487 |
| 1328.519975 | 167.808268 | 3.7872E-06  | 0.005031369 |
| 1328.559975 | 163.841611 | 3.69768E-06 | 0.004912586 |
| 1328.599975 | 166.828882 | 3.7651E-06  | 0.005002306 |
| 1328.639975 | 155.553183 | 3.51062E-06 | 0.004664348 |
| 1328.679975 | 139.503956 | 3.14841E-06 | 0.004183229 |
| 1328.719975 | 153.475261 | 3.46372E-06 | 0.004602318 |
| 1328.759975 | 178.628841 | 4.0314E-06  | 0.005356768 |
| 1328.799975 | 201.4522   | 4.5465E-06  | 0.006041383 |
| 1328.839975 | 221.479603 | 4.99849E-06 | 0.006642188 |
| 1328.879975 | 214.656566 | 4.8445E-06  | 0.006437759 |
| 1328.919975 | 192.79922  | 4.35121E-06 | 0.00578241  |
| 1328.959975 | 182.984803 | 4.12971E-06 | 0.005488222 |
| 1328.999975 | 192.272008 | 4.33931E-06 | 0.005766945 |
| 1329.039975 | 214.219749 | 4.83464E-06 | 0.006425432 |
| 1329.079975 | 210.64837  | 4.75404E-06 | 0.0063185   |
| 1329.119975 | 209.017641 | 4.71724E-06 | 0.006269774 |
| 1329.159975 | 242.700416 | 5.47741E-06 | 0.007280355 |
| 1329.199975 | 248.428853 | 5.60669E-06 | 0.007452416 |
| 1329.239975 | 249.847705 | 5.63871E-06 | 0.007495205 |
| 1329.279975 | 266.91623  | 6.02393E-06 | 0.008007486 |
| 1329.319975 | 264.477077 | 5.96888E-06 | 0.00793455  |
| 1329.359975 | 256.317017 | 5.78472E-06 | 0.007689973 |
| 1329.399975 | 235.738949 | 5.3203E-06  | 0.007072806 |
| 1329.439975 | 192.330597 | 4.34063E-06 | 0.005770612 |

|             |            |             |             |
|-------------|------------|-------------|-------------|
| 1329.479975 | 167.078395 | 3.77073E-06 | 0.005013106 |
| 1329.519975 | 162.190691 | 3.66042E-06 | 0.004866599 |
| 1329.559975 | 160.951706 | 3.63246E-06 | 0.004829568 |
| 1329.599975 | 164.794944 | 3.71919E-06 | 0.004945038 |
| 1329.639975 | 159.253406 | 3.59413E-06 | 0.004778896 |
| 1329.679975 | 160.187418 | 3.61521E-06 | 0.004807068 |
| 1329.719975 | 172.176314 | 3.88578E-06 | 0.005166999 |
| 1329.759975 | 189.35288  | 4.27343E-06 | 0.005682637 |
| 1329.799975 | 190.532541 | 4.30005E-06 | 0.005718212 |
| 1329.839975 | 180.179471 | 4.0664E-06  | 0.005407661 |
| 1329.879975 | 183.807366 | 4.14828E-06 | 0.005516709 |
| 1329.919975 | 184.005592 | 4.15275E-06 | 0.005522825 |
| 1329.959975 | 183.638405 | 4.14446E-06 | 0.00551197  |
| 1329.999975 | 208.750202 | 4.7112E-06  | 0.006265898 |
| 1330.039975 | 209.627492 | 4.731E-06   | 0.00629242  |
| 1330.079975 | 219.494025 | 4.95367E-06 | 0.006588783 |
| 1330.119975 | 247.871785 | 5.59412E-06 | 0.007440852 |
| 1330.159975 | 274.672712 | 6.19898E-06 | 0.008245636 |
| 1330.199975 | 284.868579 | 6.42909E-06 | 0.008551971 |
| 1330.239975 | 290.167975 | 6.54869E-06 | 0.008711325 |
| 1330.279975 | 266.763225 | 6.02047E-06 | 0.008008917 |
| 1330.319975 | 243.693868 | 5.49983E-06 | 0.007316535 |
| 1330.359975 | 229.451847 | 5.17841E-06 | 0.006889148 |
| 1330.399975 | 220.435861 | 4.97493E-06 | 0.006618647 |
| 1330.439975 | 218.801974 | 4.93806E-06 | 0.006569787 |
| 1330.479975 | 201.953138 | 4.5578E-06  | 0.006064063 |
| 1330.519975 | 187.676089 | 4.23559E-06 | 0.005635534 |
| 1330.559975 | 174.994599 | 3.94938E-06 | 0.005254893 |
| 1330.599975 | 149.190291 | 3.36702E-06 | 0.004480153 |
| 1330.639975 | 157.414609 | 3.55263E-06 | 0.004727269 |
| 1330.679975 | 179.118601 | 4.04246E-06 | 0.005379217 |
| 1330.719975 | 190.813301 | 4.30639E-06 | 0.0057306   |
| 1330.759975 | 208.741446 | 4.711E-06   | 0.006269215 |
| 1330.799975 | 230.535103 | 5.20286E-06 | 0.006923961 |
| 1330.839975 | 231.35325  | 5.22132E-06 | 0.006948742 |
| 1330.879975 | 223.813023 | 5.05115E-06 | 0.006722472 |
| 1330.919975 | 214.054762 | 4.83092E-06 | 0.006429565 |
| 1330.959975 | 200.290885 | 4.52029E-06 | 0.00601632  |
| 1330.999975 | 209.672968 | 4.73203E-06 | 0.006298328 |
| 1331.039975 | 216.282202 | 4.88119E-06 | 0.006497056 |
| 1331.079975 | 208.966278 | 4.71608E-06 | 0.006277477 |
| 1331.119975 | 212.17385  | 4.78847E-06 | 0.006374026 |
| 1331.159975 | 211.751782 | 4.77894E-06 | 0.006361537 |
| 1331.199975 | 229.408154 | 5.17742E-06 | 0.006892185 |
| 1331.239975 | 264.131754 | 5.96109E-06 | 0.007935636 |
| 1331.279975 | 270.790151 | 6.11136E-06 | 0.008135927 |

|             |            |             |             |
|-------------|------------|-------------|-------------|
| 1331.319975 | 252.359092 | 5.69539E-06 | 0.007582391 |
| 1331.359975 | 236.324335 | 5.33351E-06 | 0.007100823 |
| 1331.399975 | 240.040463 | 5.41738E-06 | 0.007212698 |
| 1331.439975 | 243.844106 | 5.50322E-06 | 0.00732721  |
| 1331.479975 | 225.04085  | 5.07886E-06 | 0.006762398 |
| 1331.519975 | 196.199791 | 4.42796E-06 | 0.005895912 |
| 1331.559975 | 167.260155 | 3.77483E-06 | 0.005026411 |
| 1331.599975 | 156.232726 | 3.52596E-06 | 0.004695162 |
| 1331.639975 | 168.18328  | 3.79566E-06 | 0.005054456 |
| 1331.679975 | 159.872361 | 3.6081E-06  | 0.00480483  |
| 1331.719975 | 154.092923 | 3.47766E-06 | 0.004631273 |
| 1331.759975 | 158.02427  | 3.56639E-06 | 0.004749572 |
| 1331.799975 | 160.123955 | 3.61377E-06 | 0.004812825 |
| 1331.839975 | 156.290704 | 3.52726E-06 | 0.004697751 |
| 1331.879975 | 153.131297 | 3.45596E-06 | 0.004602924 |
| 1331.919975 | 158.821507 | 3.58438E-06 | 0.004774108 |
| 1331.959975 | 152.621815 | 3.44446E-06 | 0.004587885 |
| 1331.999975 | 152.819145 | 3.44892E-06 | 0.004593955 |
| 1332.039975 | 168.414163 | 3.80087E-06 | 0.005062915 |
| 1332.079975 | 187.740436 | 4.23704E-06 | 0.005644076 |
| 1332.119975 | 215.210883 | 4.85701E-06 | 0.00647012  |
| 1332.159975 | 234.50155  | 5.29237E-06 | 0.007050288 |
| 1332.199975 | 268.870964 | 6.06804E-06 | 0.008083847 |
| 1332.239975 | 310.573419 | 7.00921E-06 | 0.009337949 |
| 1332.279975 | 313.0681   | 7.06551E-06 | 0.009413239 |
| 1332.319975 | 302.370831 | 6.82409E-06 | 0.009091869 |
| 1332.359975 | 301.201392 | 6.7977E-06  | 0.009056978 |
| 1332.399975 | 291.246106 | 6.57302E-06 | 0.00875789  |
| 1332.439975 | 251.648054 | 5.67935E-06 | 0.007567388 |
| 1332.479975 | 217.852866 | 4.91664E-06 | 0.006551319 |
| 1332.519975 | 205.031251 | 4.62727E-06 | 0.006165929 |
| 1332.559975 | 199.067713 | 4.49268E-06 | 0.005986767 |
| 1332.599975 | 173.147905 | 3.90771E-06 | 0.00520741  |
| 1332.639975 | 169.874603 | 3.83383E-06 | 0.005109119 |
| 1332.679975 | 181.539386 | 4.09709E-06 | 0.005460111 |
| 1332.719975 | 201.622639 | 4.55034E-06 | 0.006064332 |
| 1332.759975 | 242.583784 | 5.47478E-06 | 0.007296565 |
| 1332.799975 | 257.987599 | 5.82242E-06 | 0.007760122 |
| 1332.839975 | 217.539245 | 4.90956E-06 | 0.006543655 |
| 1332.879975 | 204.935376 | 4.62511E-06 | 0.006164711 |
| 1332.919975 | 201.183398 | 4.54043E-06 | 0.006052029 |
| 1332.959975 | 212.9423   | 4.80581E-06 | 0.006405954 |
| 1332.999975 | 230.523098 | 5.20259E-06 | 0.006935046 |
| 1333.039975 | 227.985958 | 5.14533E-06 | 0.006858925 |
| 1333.079975 | 221.646044 | 5.00224E-06 | 0.006668389 |
| 1333.119975 | 230.065049 | 5.19225E-06 | 0.006921889 |

|             |            |             |             |
|-------------|------------|-------------|-------------|
| 1333.159975 | 232.333465 | 5.24344E-06 | 0.006990348 |
| 1333.199975 | 236.730916 | 5.34269E-06 | 0.00712287  |
| 1333.239975 | 254.413771 | 5.74176E-06 | 0.00765515  |
| 1333.279975 | 276.661364 | 6.24386E-06 | 0.008324816 |
| 1333.319975 | 279.748288 | 6.31353E-06 | 0.008417955 |
| 1333.359975 | 256.519901 | 5.7893E-06  | 0.007719217 |
| 1333.399975 | 242.154818 | 5.4651E-06  | 0.00728716  |
| 1333.439975 | 219.595182 | 4.95596E-06 | 0.006608472 |
| 1333.479975 | 200.868625 | 4.53333E-06 | 0.006045098 |
| 1333.519975 | 192.290433 | 4.33973E-06 | 0.005787113 |
| 1333.559975 | 176.209032 | 3.97679E-06 | 0.005303291 |
| 1333.599975 | 168.208456 | 3.79623E-06 | 0.005062653 |
| 1333.639975 | 171.254761 | 3.86498E-06 | 0.005154494 |
| 1333.679975 | 170.717028 | 3.85285E-06 | 0.005138463 |
| 1333.719975 | 158.172958 | 3.56974E-06 | 0.004761038 |
| 1333.759975 | 155.27828  | 3.50441E-06 | 0.004674048 |
| 1333.799975 | 159.022558 | 3.58892E-06 | 0.004786898 |
| 1333.839975 | 173.729727 | 3.92084E-06 | 0.00522977  |
| 1333.879975 | 188.778416 | 4.26047E-06 | 0.00568295  |
| 1333.919975 | 190.986484 | 4.3103E-06  | 0.005749594 |
| 1333.959975 | 185.544726 | 4.18749E-06 | 0.005585939 |
| 1333.999975 | 169.907678 | 3.83458E-06 | 0.005115329 |
| 1334.039975 | 162.240077 | 3.66153E-06 | 0.004884631 |
| 1334.079975 | 170.840126 | 3.85562E-06 | 0.00514371  |
| 1334.119975 | 191.993555 | 4.33303E-06 | 0.005780778 |
| 1334.159975 | 211.307902 | 4.76893E-06 | 0.006362509 |
| 1334.199975 | 214.785146 | 4.8474E-06  | 0.006467403 |
| 1334.239975 | 232.14656  | 5.23922E-06 | 0.006990383 |
| 1334.279975 | 233.093689 | 5.2606E-06  | 0.007019113 |
| 1334.319975 | 225.580209 | 5.09103E-06 | 0.006793065 |
| 1334.359975 | 241.671138 | 5.45418E-06 | 0.007277841 |
| 1334.399975 | 261.617773 | 5.90435E-06 | 0.007878763 |
| 1334.439975 | 245.220542 | 5.53429E-06 | 0.007385173 |
| 1334.479975 | 226.93133  | 5.12152E-06 | 0.006834571 |
| 1334.519975 | 192.257253 | 4.33898E-06 | 0.005790453 |
| 1334.559975 | 167.78226  | 3.78661E-06 | 0.005053461 |
| 1334.599975 | 172.64247  | 3.8963E-06  | 0.005200002 |
| 1334.639975 | 191.217934 | 4.31552E-06 | 0.005759669 |
| 1334.679975 | 204.308751 | 4.61096E-06 | 0.006154161 |
| 1334.719975 | 208.354985 | 4.70228E-06 | 0.006276229 |
| 1334.759975 | 221.673514 | 5.00286E-06 | 0.006677621 |
| 1334.799975 | 207.007201 | 4.67186E-06 | 0.006236004 |
| 1334.839975 | 179.001348 | 4.03981E-06 | 0.005392501 |
| 1334.879975 | 159.855172 | 3.60771E-06 | 0.004815858 |
| 1334.919975 | 154.514531 | 3.48718E-06 | 0.004655103 |
| 1334.959975 | 173.445808 | 3.91443E-06 | 0.005225608 |

|             |            |             |             |
|-------------|------------|-------------|-------------|
| 1334.999975 | 194.915957 | 4.39898E-06 | 0.00587264  |
| 1335.039975 | 199.917665 | 4.51186E-06 | 0.006023518 |
| 1335.079975 | 210.104427 | 4.74176E-06 | 0.006330635 |
| 1335.119975 | 230.110383 | 5.19327E-06 | 0.00693364  |
| 1335.159975 | 241.166296 | 5.44279E-06 | 0.007266992 |
| 1335.199975 | 265.883528 | 6.00062E-06 | 0.008012029 |
| 1335.239975 | 286.538773 | 6.46678E-06 | 0.008634704 |
| 1335.279975 | 289.907191 | 6.5428E-06  | 0.008736472 |
| 1335.319975 | 275.023175 | 6.20689E-06 | 0.008288184 |
| 1335.359975 | 237.079585 | 5.35056E-06 | 0.007144918 |
| 1335.399975 | 202.666196 | 4.57389E-06 | 0.006107978 |
| 1335.439975 | 188.863375 | 4.26238E-06 | 0.005692157 |
| 1335.479975 | 183.559291 | 4.14268E-06 | 0.005532463 |
| 1335.519975 | 170.669611 | 3.85178E-06 | 0.005144123 |
| 1335.559975 | 164.020434 | 3.70171E-06 | 0.004943859 |
| 1335.599975 | 148.236333 | 3.34549E-06 | 0.004468233 |
| 1335.639975 | 139.090013 | 3.13907E-06 | 0.004192665 |
| 1335.679975 | 157.181977 | 3.54738E-06 | 0.004738162 |
| 1335.719975 | 183.801538 | 4.14814E-06 | 0.00554076  |
| 1335.759975 | 192.967565 | 4.35501E-06 | 0.005817247 |
| 1335.799975 | 186.485124 | 4.20871E-06 | 0.005621994 |
| 1335.839975 | 182.04774  | 4.10856E-06 | 0.005488384 |
| 1335.879975 | 195.133458 | 4.40389E-06 | 0.005883069 |
| 1335.919975 | 209.931224 | 4.73786E-06 | 0.006329396 |
| 1335.959975 | 213.5765   | 4.82012E-06 | 0.006439493 |
| 1335.999975 | 179.912855 | 4.06038E-06 | 0.005424671 |
| 1336.039975 | 159.164446 | 3.59212E-06 | 0.004799216 |
| 1336.079975 | 178.434168 | 4.02701E-06 | 0.005380408 |
| 1336.119975 | 211.140625 | 4.76515E-06 | 0.006366812 |
| 1336.159975 | 248.610149 | 5.61078E-06 | 0.007496906 |
| 1336.199975 | 258.578114 | 5.83575E-06 | 0.007797726 |
| 1336.239975 | 280.810673 | 6.33751E-06 | 0.008468429 |
| 1336.279975 | 286.377937 | 6.46315E-06 | 0.008636579 |
| 1336.319975 | 294.575552 | 6.64816E-06 | 0.008884069 |
| 1336.359975 | 286.631405 | 6.46887E-06 | 0.008644741 |
| 1336.399975 | 256.210516 | 5.78231E-06 | 0.007727485 |
| 1336.439975 | 234.448876 | 5.29118E-06 | 0.007071351 |
| 1336.479975 | 208.880299 | 4.71414E-06 | 0.00630035  |
| 1336.519975 | 197.297377 | 4.45273E-06 | 0.005951159 |
| 1336.559975 | 187.568402 | 4.23316E-06 | 0.005657869 |
| 1336.599975 | 182.011038 | 4.10774E-06 | 0.005490399 |
| 1336.639975 | 184.587425 | 4.16588E-06 | 0.005568283 |
| 1336.679975 | 197.345318 | 4.45381E-06 | 0.005953317 |
| 1336.719975 | 186.563537 | 4.21048E-06 | 0.005628232 |
| 1336.759975 | 167.5569   | 3.78153E-06 | 0.005054992 |
| 1336.799975 | 178.346299 | 4.02503E-06 | 0.005380657 |

|             |            |             |             |
|-------------|------------|-------------|-------------|
| 1336.839975 | 182.169443 | 4.11131E-06 | 0.005496164 |
| 1336.879975 | 183.796434 | 4.14803E-06 | 0.005545418 |
| 1336.919975 | 196.098759 | 4.42568E-06 | 0.005916774 |
| 1336.959975 | 203.586891 | 4.59467E-06 | 0.006142893 |
| 1336.999975 | 197.730884 | 4.46251E-06 | 0.005966377 |
| 1337.039975 | 190.125825 | 4.29088E-06 | 0.005737071 |
| 1337.079975 | 218.140018 | 4.92312E-06 | 0.0065826   |
| 1337.119975 | 255.81365  | 5.77336E-06 | 0.007719672 |
| 1337.159975 | 269.694435 | 6.08663E-06 | 0.008138795 |
| 1337.199975 | 272.896243 | 6.15889E-06 | 0.008235665 |
| 1337.239975 | 299.938027 | 6.76918E-06 | 0.009052023 |
| 1337.279975 | 355.301323 | 8.01866E-06 | 0.010723188 |
| 1337.319975 | 369.091115 | 8.32987E-06 | 0.011139705 |
| 1337.359975 | 335.380502 | 7.56907E-06 | 0.010122572 |
| 1337.399975 | 299.747562 | 6.76488E-06 | 0.009047357 |
| 1337.439975 | 281.765584 | 6.35906E-06 | 0.008504857 |
| 1337.479975 | 253.887828 | 5.72989E-06 | 0.007663619 |
| 1337.519975 | 205.857607 | 4.64592E-06 | 0.00621401  |
| 1337.559975 | 169.234165 | 3.81938E-06 | 0.005108649 |
| 1337.599975 | 165.154532 | 3.72731E-06 | 0.004985647 |
| 1337.639975 | 156.582441 | 3.53385E-06 | 0.004727016 |
| 1337.679975 | 162.658864 | 3.67098E-06 | 0.004910602 |
| 1337.719975 | 159.857723 | 3.60777E-06 | 0.004826181 |
| 1337.759975 | 160.115924 | 3.61359E-06 | 0.004834121 |
| 1337.799975 | 160.827696 | 3.62966E-06 | 0.004855755 |
| 1337.839975 | 159.445097 | 3.59845E-06 | 0.004814155 |
| 1337.879975 | 168.325589 | 3.79887E-06 | 0.005082438 |
| 1337.919975 | 171.433658 | 3.86902E-06 | 0.005176438 |
| 1337.959975 | 175.517676 | 3.96119E-06 | 0.005299913 |
| 1337.999975 | 184.403894 | 4.16174E-06 | 0.005568407 |
| 1338.039975 | 188.00754  | 4.24307E-06 | 0.005677395 |
| 1338.079975 | 203.061546 | 4.58282E-06 | 0.006132175 |
| 1338.119975 | 219.585635 | 4.95574E-06 | 0.006631377 |
| 1338.159975 | 233.564348 | 5.27122E-06 | 0.007053738 |
| 1338.199975 | 251.723653 | 5.68105E-06 | 0.007602384 |
| 1338.239975 | 259.673285 | 5.86046E-06 | 0.007842708 |
| 1338.279975 | 273.581101 | 6.17434E-06 | 0.008263001 |
| 1338.319975 | 285.149391 | 6.43542E-06 | 0.008612657 |
| 1338.359975 | 280.962774 | 6.34094E-06 | 0.008486458 |
| 1338.399975 | 264.556367 | 5.97067E-06 | 0.007991143 |
| 1338.439975 | 238.017227 | 5.37172E-06 | 0.007189721 |
| 1338.479975 | 220.619394 | 4.97907E-06 | 0.006664389 |
| 1338.519975 | 193.86821  | 4.37534E-06 | 0.005856474 |
| 1338.559975 | 176.707797 | 3.98805E-06 | 0.005338243 |
| 1338.599975 | 168.44192  | 3.8015E-06  | 0.005088687 |
| 1338.639975 | 153.490632 | 3.46407E-06 | 0.004637142 |

|             |            |             |             |
|-------------|------------|-------------|-------------|
| 1338.679975 | 144.949871 | 3.27132E-06 | 0.004379246 |
| 1338.719975 | 155.284208 | 3.50455E-06 | 0.004691609 |
| 1338.759975 | 173.4585   | 3.91472E-06 | 0.005240866 |
| 1338.799975 | 181.242103 | 4.09038E-06 | 0.005476203 |
| 1338.839975 | 171.638959 | 3.87365E-06 | 0.0051862   |
| 1338.879975 | 161.693671 | 3.6492E-06  | 0.004885842 |
| 1338.919975 | 162.736507 | 3.67274E-06 | 0.0049175   |
| 1338.959975 | 179.498483 | 4.05103E-06 | 0.005424168 |
| 1338.999975 | 203.692764 | 4.59706E-06 | 0.006155466 |
| 1339.039975 | 227.101557 | 5.12537E-06 | 0.00686307  |
| 1339.079975 | 249.940243 | 5.6408E-06  | 0.007553487 |
| 1339.119975 | 249.168176 | 5.62338E-06 | 0.007530379 |
| 1339.159975 | 254.047908 | 5.73351E-06 | 0.007678084 |
| 1339.199975 | 276.87581  | 6.2487E-06  | 0.008368261 |
| 1339.239975 | 292.744378 | 6.60683E-06 | 0.008848135 |
| 1339.279975 | 301.690126 | 6.80873E-06 | 0.00911879  |
| 1339.319975 | 304.575462 | 6.87384E-06 | 0.009206276 |
| 1339.359975 | 296.227607 | 6.68544E-06 | 0.008954217 |
| 1339.399975 | 265.340408 | 5.98836E-06 | 0.008020814 |
| 1339.439975 | 259.082746 | 5.84714E-06 | 0.007831889 |
| 1339.479975 | 256.271332 | 5.78369E-06 | 0.007747133 |
| 1339.519975 | 213.168043 | 4.81091E-06 | 0.006444304 |
| 1339.559975 | 174.649202 | 3.94159E-06 | 0.005279995 |
| 1339.599975 | 156.694042 | 3.53637E-06 | 0.004737316 |
| 1339.639975 | 159.620844 | 3.60242E-06 | 0.004825946 |
| 1339.679975 | 189.309338 | 4.27245E-06 | 0.005723713 |
| 1339.719975 | 197.410784 | 4.45529E-06 | 0.005968836 |
| 1339.759975 | 170.380719 | 3.84526E-06 | 0.005151719 |
| 1339.799975 | 180.207307 | 4.06703E-06 | 0.005449004 |
| 1339.839975 | 182.689246 | 4.12304E-06 | 0.005524216 |
| 1339.879975 | 182.529205 | 4.11943E-06 | 0.005519542 |
| 1339.919975 | 188.7534   | 4.2599E-06  | 0.005707927 |
| 1339.959975 | 192.845789 | 4.35226E-06 | 0.005831855 |
| 1339.999975 | 209.49753  | 4.72807E-06 | 0.00633561  |
| 1340.039975 | 216.664165 | 4.88981E-06 | 0.006552539 |
| 1340.079975 | 210.51408  | 4.75101E-06 | 0.006366733 |
| 1340.119975 | 211.801563 | 4.78007E-06 | 0.006405862 |
| 1340.159975 | 222.46551  | 5.02074E-06 | 0.00672859  |
| 1340.199975 | 241.56678  | 5.45183E-06 | 0.007306537 |
| 1340.239975 | 249.008716 | 5.61978E-06 | 0.007531854 |
| 1340.279975 | 254.158555 | 5.736E-06   | 0.007687852 |
| 1340.319975 | 239.548058 | 5.40627E-06 | 0.007246126 |
| 1340.359975 | 239.411403 | 5.40318E-06 | 0.007242209 |
| 1340.399975 | 237.090666 | 5.35081E-06 | 0.00717222  |
| 1340.439975 | 232.503686 | 5.24728E-06 | 0.00703367  |
| 1340.479975 | 207.81291  | 4.69005E-06 | 0.006286915 |



|             |            |             |             |
|-------------|------------|-------------|-------------|
| 1340.519975 | 158.146313 | 3.56914E-06 | 0.004784506 |
| 1340.559975 | 160.30726  | 3.61791E-06 | 0.004850027 |
| 1340.599975 | 174.082315 | 3.9288E-06  | 0.005266943 |
| 1340.639975 | 185.297422 | 4.1819E-06  | 0.005606429 |
| 1340.679975 | 176.21713  | 3.97698E-06 | 0.005331851 |
| 1340.719975 | 165.397158 | 3.73278E-06 | 0.005004617 |
| 1340.759975 | 167.448841 | 3.77909E-06 | 0.005066849 |
| 1340.799975 | 176.775835 | 3.98958E-06 | 0.005349235 |
| 1340.839975 | 192.931591 | 4.3542E-06  | 0.005838282 |
| 1340.879974 | 214.944773 | 4.851E-06   | 0.006504614 |
| 1340.919974 | 229.707115 | 5.18417E-06 | 0.006951557 |
| 1340.959974 | 237.090964 | 5.35081E-06 | 0.007175226 |
| 1340.999974 | 230.413821 | 5.20012E-06 | 0.006973359 |
| 1341.039974 | 223.732831 | 5.04934E-06 | 0.006771365 |
| 1341.079974 | 235.671405 | 5.31878E-06 | 0.007132903 |
| 1341.119974 | 225.670657 | 5.09307E-06 | 0.006830421 |
| 1341.159974 | 216.324257 | 4.88214E-06 | 0.006547727 |
| 1341.199974 | 229.609098 | 5.18196E-06 | 0.006950041 |
| 1341.239974 | 282.740294 | 6.38105E-06 | 0.008558526 |
| 1341.279974 | 314.817455 | 7.10499E-06 | 0.009529783 |
| 1341.319974 | 313.080541 | 7.06579E-06 | 0.009477488 |
| 1341.359974 | 303.659854 | 6.85318E-06 | 0.009192581 |
| 1341.399974 | 278.421848 | 6.28359E-06 | 0.008428812 |
| 1341.439974 | 261.329407 | 5.89784E-06 | 0.007911599 |
| 1341.479974 | 234.476494 | 5.29181E-06 | 0.007098854 |
| 1341.519974 | 193.941553 | 4.37699E-06 | 0.00587182  |
| 1341.559974 | 165.207679 | 3.72851E-06 | 0.005002016 |
| 1341.599974 | 166.866521 | 3.76594E-06 | 0.005052392 |
| 1341.639974 | 165.169483 | 3.72765E-06 | 0.005001158 |
| 1341.679974 | 148.103652 | 3.34249E-06 | 0.004484556 |
| 1341.719974 | 158.294817 | 3.57249E-06 | 0.004793286 |
| 1341.759974 | 174.497107 | 3.93816E-06 | 0.005284061 |
| 1341.799974 | 193.192291 | 4.36008E-06 | 0.005850356 |
| 1341.839974 | 194.259384 | 4.38416E-06 | 0.005882846 |
| 1341.879974 | 192.201625 | 4.33772E-06 | 0.005820704 |
| 1341.919974 | 191.320369 | 4.31783E-06 | 0.005794188 |
| 1341.959974 | 174.69011  | 3.94251E-06 | 0.005290694 |
| 1341.999974 | 170.043112 | 3.83764E-06 | 0.005150108 |
| 1342.039974 | 172.116433 | 3.88443E-06 | 0.005213058 |
| 1342.079974 | 174.088686 | 3.92894E-06 | 0.005272951 |
| 1342.119974 | 190.764198 | 4.30528E-06 | 0.005778205 |
| 1342.159974 | 200.991397 | 4.5361E-06  | 0.006088166 |
| 1342.199974 | 247.30609  | 5.58135E-06 | 0.007491293 |
| 1342.239974 | 269.868374 | 6.09055E-06 | 0.008174984 |
| 1342.279974 | 259.665807 | 5.8603E-06  | 0.007866157 |
| 1342.319974 | 253.408237 | 5.71907E-06 | 0.007676823 |

|             |            |             |             |
|-------------|------------|-------------|-------------|
| 1342.359974 | 246.00983  | 5.5521E-06  | 0.007452916 |
| 1342.399974 | 229.591448 | 5.18156E-06 | 0.006955725 |
| 1342.439974 | 200.814831 | 4.53211E-06 | 0.006084087 |
| 1342.479974 | 169.351012 | 3.82202E-06 | 0.005130981 |
| 1342.519974 | 162.65768  | 3.67096E-06 | 0.004928333 |
| 1342.559974 | 166.406737 | 3.75557E-06 | 0.005042076 |
| 1342.599974 | 176.810703 | 3.99037E-06 | 0.005357472 |
| 1342.639974 | 180.542012 | 4.07458E-06 | 0.005470696 |
| 1342.679974 | 162.804726 | 3.67428E-06 | 0.004933377 |
| 1342.719974 | 142.518746 | 3.21645E-06 | 0.004318791 |
| 1342.759974 | 156.2475   | 3.52629E-06 | 0.004734959 |
| 1342.799974 | 192.799944 | 4.35123E-06 | 0.005842826 |
| 1342.839974 | 205.903728 | 4.64696E-06 | 0.006240124 |
| 1342.879974 | 188.068217 | 4.24444E-06 | 0.00569977  |
| 1342.919974 | 183.057302 | 4.13135E-06 | 0.00554807  |
| 1342.959974 | 195.812102 | 4.41921E-06 | 0.005934817 |
| 1342.999974 | 206.471679 | 4.65978E-06 | 0.006258082 |
| 1343.039974 | 218.489706 | 4.93101E-06 | 0.006622541 |
| 1343.079974 | 228.205318 | 5.15028E-06 | 0.006917233 |
| 1343.119974 | 221.124701 | 4.99048E-06 | 0.006702809 |
| 1343.159974 | 222.358565 | 5.01832E-06 | 0.006740411 |
| 1343.199974 | 239.173488 | 5.39781E-06 | 0.007250342 |
| 1343.239974 | 254.322653 | 5.73971E-06 | 0.007709805 |
| 1343.279974 | 256.672975 | 5.79275E-06 | 0.007781287 |
| 1343.319974 | 250.7978   | 5.66016E-06 | 0.007603402 |
| 1343.359974 | 231.200272 | 5.21787E-06 | 0.007009475 |
| 1343.399974 | 213.644953 | 4.82167E-06 | 0.00647743  |
| 1343.439974 | 215.101053 | 4.85453E-06 | 0.006521771 |
| 1343.479974 | 198.487096 | 4.47958E-06 | 0.006018222 |
| 1343.519974 | 162.415059 | 3.66548E-06 | 0.004924648 |
| 1343.559974 | 148.61407  | 3.35401E-06 | 0.004506317 |
| 1343.599974 | 164.919192 | 3.722E-06   | 0.005000874 |
| 1343.639974 | 169.801837 | 3.83219E-06 | 0.005149085 |
| 1343.679974 | 176.258185 | 3.9779E-06  | 0.005345027 |
| 1343.719974 | 193.658097 | 4.37059E-06 | 0.005872854 |
| 1343.759974 | 211.764914 | 4.77924E-06 | 0.00642215  |
| 1343.799974 | 216.915926 | 4.89549E-06 | 0.00657856  |
| 1343.839974 | 192.953482 | 4.35469E-06 | 0.005852008 |
| 1343.879974 | 166.931817 | 3.76742E-06 | 0.005062958 |
| 1343.919974 | 152.849929 | 3.44961E-06 | 0.004636    |
| 1343.959974 | 153.977191 | 3.47505E-06 | 0.004670329 |
| 1343.999974 | 180.154528 | 4.06584E-06 | 0.005464485 |
| 1344.039974 | 202.613863 | 4.57271E-06 | 0.006145909 |
| 1344.079974 | 203.006737 | 4.58158E-06 | 0.006158009 |
| 1344.119974 | 202.60433  | 4.5725E-06  | 0.006145985 |
| 1344.159974 | 210.131924 | 4.74238E-06 | 0.006374524 |

|             |            |             |             |
|-------------|------------|-------------|-------------|
| 1344.199974 | 232.968179 | 5.25777E-06 | 0.007067491 |
| 1344.239974 | 238.354708 | 5.37933E-06 | 0.007231115 |
| 1344.279974 | 236.243872 | 5.3317E-06  | 0.007167291 |
| 1344.319974 | 244.897618 | 5.527E-06   | 0.007430054 |
| 1344.359974 | 237.629312 | 5.36296E-06 | 0.007209752 |
| 1344.399974 | 234.325383 | 5.2884E-06  | 0.007109721 |
| 1344.439974 | 209.058839 | 4.71817E-06 | 0.006343292 |
| 1344.479974 | 180.026098 | 4.06294E-06 | 0.005462539 |
| 1344.519974 | 170.32224  | 3.84394E-06 | 0.005168248 |
| 1344.559974 | 178.007242 | 4.01738E-06 | 0.005401602 |
| 1344.599974 | 191.265907 | 4.31661E-06 | 0.005804107 |
| 1344.639974 | 207.649851 | 4.68637E-06 | 0.006301478 |
| 1344.679974 | 209.78534  | 4.73456E-06 | 0.006366472 |
| 1344.719974 | 208.715621 | 4.71042E-06 | 0.006334197 |
| 1344.759974 | 207.83076  | 4.69045E-06 | 0.00630753  |
| 1344.799974 | 215.593413 | 4.86564E-06 | 0.006543317 |
| 1344.839974 | 209.107759 | 4.71927E-06 | 0.006346664 |
| 1344.879974 | 199.899339 | 4.51145E-06 | 0.006067358 |
| 1344.919974 | 210.733259 | 4.75596E-06 | 0.00639638  |
| 1344.959974 | 210.651252 | 4.75411E-06 | 0.006394081 |
| 1344.999974 | 192.508794 | 4.34466E-06 | 0.005843561 |
| 1345.039974 | 185.121859 | 4.17794E-06 | 0.0056195   |
| 1345.079974 | 209.066806 | 4.71835E-06 | 0.006346554 |
| 1345.119974 | 257.714183 | 5.81625E-06 | 0.007823554 |
| 1345.159974 | 304.284075 | 6.86727E-06 | 0.009237574 |
| 1345.199974 | 324.939728 | 7.33344E-06 | 0.009864939 |
| 1345.239974 | 321.553474 | 7.25701E-06 | 0.009762425 |
| 1345.279974 | 296.727673 | 6.69673E-06 | 0.009008977 |
| 1345.319974 | 277.921794 | 6.27231E-06 | 0.008438261 |
| 1345.359974 | 274.837891 | 6.20271E-06 | 0.008344876 |
| 1345.399974 | 253.574567 | 5.72282E-06 | 0.007699488 |
| 1345.439974 | 222.391845 | 5.01907E-06 | 0.006752863 |
| 1345.479974 | 191.378094 | 4.31914E-06 | 0.005811312 |
| 1345.519974 | 164.953821 | 3.72278E-06 | 0.005009072 |
| 1345.559974 | 157.203341 | 3.54786E-06 | 0.004773859 |
| 1345.599974 | 148.938529 | 3.36134E-06 | 0.004523012 |
| 1345.639974 | 144.13743  | 3.25298E-06 | 0.004377341 |
| 1345.679974 | 170.795552 | 3.85462E-06 | 0.005187082 |
| 1345.719974 | 209.86452  | 4.73635E-06 | 0.006373801 |
| 1345.759974 | 217.500517 | 4.90868E-06 | 0.00660591  |
| 1345.799974 | 201.933422 | 4.55736E-06 | 0.00613329  |
| 1345.839974 | 172.459133 | 3.89216E-06 | 0.005238228 |
| 1345.879974 | 158.198297 | 3.57032E-06 | 0.004805216 |
| 1345.919974 | 162.259124 | 3.66196E-06 | 0.004928708 |
| 1345.959974 | 165.693733 | 3.73948E-06 | 0.005033186 |
| 1345.999974 | 169.292175 | 3.82069E-06 | 0.005142647 |

|             |            |             |             |
|-------------|------------|-------------|-------------|
| 1346.039974 | 163.627989 | 3.69286E-06 | 0.004970732 |
| 1346.079974 | 163.353116 | 3.68665E-06 | 0.004962529 |
| 1346.119974 | 174.011075 | 3.92719E-06 | 0.005286466 |
| 1346.159974 | 208.032918 | 4.69501E-06 | 0.006320239 |
| 1346.199974 | 250.616106 | 5.65606E-06 | 0.007614183 |
| 1346.239974 | 269.523609 | 6.08277E-06 | 0.008188871 |
| 1346.279974 | 276.010895 | 6.22918E-06 | 0.008386222 |
| 1346.319974 | 267.175054 | 6.02977E-06 | 0.008117998 |
| 1346.359974 | 253.550613 | 5.72228E-06 | 0.007704254 |
| 1346.399974 | 235.026489 | 5.30422E-06 | 0.007141602 |
| 1346.439974 | 213.761589 | 4.8243E-06  | 0.006495632 |
| 1346.479974 | 182.830232 | 4.12622E-06 | 0.005555878 |
| 1346.519974 | 154.370242 | 3.48392E-06 | 0.00469117  |
| 1346.559974 | 135.712799 | 3.06285E-06 | 0.00412431  |
| 1346.599974 | 135.529013 | 3.0587E-06  | 0.004118847 |
| 1346.639974 | 156.047356 | 3.52177E-06 | 0.004742558 |
| 1346.679974 | 176.291649 | 3.97866E-06 | 0.005357978 |
| 1346.719974 | 173.217327 | 3.90927E-06 | 0.005264697 |
| 1346.759974 | 177.575139 | 4.00762E-06 | 0.005397307 |
| 1346.799974 | 191.701524 | 4.32644E-06 | 0.005826844 |
| 1346.839974 | 183.726703 | 4.14646E-06 | 0.005584612 |
| 1346.879974 | 180.881298 | 4.08224E-06 | 0.005498286 |
| 1346.919974 | 182.628859 | 4.12168E-06 | 0.005551572 |
| 1346.959974 | 172.811607 | 3.90012E-06 | 0.005253302 |
| 1346.999974 | 170.772158 | 3.85409E-06 | 0.005191459 |
| 1347.039974 | 173.436635 | 3.91422E-06 | 0.005272615 |
| 1347.079974 | 180.968637 | 4.08421E-06 | 0.005501758 |
| 1347.119974 | 201.718628 | 4.55251E-06 | 0.006132775 |
| 1347.159974 | 227.630909 | 5.13731E-06 | 0.006920782 |
| 1347.199974 | 259.377099 | 5.85378E-06 | 0.007886212 |
| 1347.239974 | 279.773775 | 6.3141E-06  | 0.008506614 |
| 1347.279974 | 272.87174  | 6.15834E-06 | 0.008297002 |
| 1347.319974 | 274.645554 | 6.19837E-06 | 0.008351184 |
| 1347.359974 | 268.774646 | 6.06587E-06 | 0.00817291  |
| 1347.399974 | 259.942444 | 5.86654E-06 | 0.007904574 |
| 1347.439974 | 248.884084 | 5.61697E-06 | 0.007568526 |
| 1347.479974 | 210.512618 | 4.75098E-06 | 0.006401846 |
| 1347.519974 | 180.21082  | 4.06711E-06 | 0.005480508 |
| 1347.559974 | 162.45199  | 3.66632E-06 | 0.00494058  |
| 1347.599974 | 143.38377  | 3.23597E-06 | 0.004360796 |
| 1347.639974 | 127.052484 | 2.8674E-06  | 0.00386422  |
| 1347.679974 | 138.109688 | 3.11694E-06 | 0.004200642 |
| 1347.719974 | 170.053859 | 3.83788E-06 | 0.005172386 |
| 1347.759974 | 188.27473  | 4.2491E-06  | 0.005726765 |
| 1347.799974 | 174.025585 | 3.92752E-06 | 0.005293505 |
| 1347.839974 | 172.442168 | 3.89178E-06 | 0.005245496 |

|             |            |             |             |
|-------------|------------|-------------|-------------|
| 1347.879974 | 174.229488 | 3.93212E-06 | 0.005300022 |
| 1347.919974 | 168.80156  | 3.80962E-06 | 0.005135058 |
| 1347.959974 | 163.480343 | 3.68952E-06 | 0.00497333  |
| 1347.999974 | 164.539305 | 3.71342E-06 | 0.005005694 |
| 1348.039974 | 187.570298 | 4.2332E-06  | 0.005706523 |
| 1348.079974 | 215.381212 | 4.86085E-06 | 0.00655282  |
| 1348.119974 | 233.782531 | 5.27615E-06 | 0.007112878 |
| 1348.159974 | 241.875976 | 5.4588E-06  | 0.007359341 |
| 1348.199974 | 232.643364 | 5.25044E-06 | 0.007078639 |
| 1348.239974 | 226.65405  | 5.11527E-06 | 0.006896606 |
| 1348.279974 | 233.783119 | 5.27616E-06 | 0.00711374  |
| 1348.319974 | 238.270725 | 5.37744E-06 | 0.007250508 |
| 1348.359974 | 234.392258 | 5.28991E-06 | 0.007132699 |
| 1348.399974 | 237.249498 | 5.35439E-06 | 0.00721986  |
| 1348.439974 | 226.024729 | 5.10106E-06 | 0.006878478 |
| 1348.479974 | 176.080067 | 3.97388E-06 | 0.0053587   |
| 1348.519974 | 149.03374  | 3.36348E-06 | 0.004535725 |
| 1348.559974 | 150.52297  | 3.39709E-06 | 0.004581185 |
| 1348.599974 | 158.480591 | 3.57669E-06 | 0.004823519 |
| 1348.639974 | 176.604592 | 3.98572E-06 | 0.005375301 |
| 1348.679974 | 194.782094 | 4.39596E-06 | 0.005928744 |
| 1348.719974 | 197.50726  | 4.45746E-06 | 0.00601187  |
| 1348.759974 | 187.447768 | 4.23044E-06 | 0.005705841 |
| 1348.799974 | 191.337193 | 4.31821E-06 | 0.005824407 |
| 1348.839974 | 202.325319 | 4.5662E-06  | 0.006159074 |
| 1348.879974 | 203.465014 | 4.59192E-06 | 0.006193952 |
| 1348.919974 | 204.327212 | 4.61138E-06 | 0.006220383 |
| 1348.959974 | 199.708003 | 4.50713E-06 | 0.00607994  |
| 1348.999974 | 187.144571 | 4.22359E-06 | 0.005697626 |
| 1349.039974 | 170.464046 | 3.84714E-06 | 0.00518994  |
| 1349.079974 | 184.509906 | 4.16413E-06 | 0.005617747 |
| 1349.119974 | 212.044131 | 4.78554E-06 | 0.006456269 |
| 1349.159974 | 222.246932 | 5.0158E-06  | 0.006767122 |
| 1349.199974 | 218.755266 | 4.937E-06   | 0.006661003 |
| 1349.239974 | 210.852442 | 4.75865E-06 | 0.006420555 |
| 1349.279974 | 241.078024 | 5.4408E-06  | 0.007341156 |
| 1349.319974 | 251.509205 | 5.67621E-06 | 0.007659027 |
| 1349.359974 | 239.809063 | 5.41216E-06 | 0.007302947 |
| 1349.399974 | 232.343182 | 5.24366E-06 | 0.007075797 |
| 1349.439974 | 225.244063 | 5.08344E-06 | 0.006859804 |
| 1349.479974 | 194.672632 | 4.39349E-06 | 0.005928927 |
| 1349.519974 | 164.802501 | 3.71936E-06 | 0.005019355 |
| 1349.559974 | 159.13529  | 3.59146E-06 | 0.004846893 |
| 1349.599974 | 175.047501 | 3.95058E-06 | 0.0053317   |
| 1349.639974 | 192.995805 | 4.35565E-06 | 0.005878555 |
| 1349.679974 | 172.37894  | 3.89035E-06 | 0.005250731 |

|             |            |             |             |
|-------------|------------|-------------|-------------|
| 1349.719974 | 160.891799 | 3.6311E-06  | 0.004900973 |
| 1349.759974 | 162.474618 | 3.66683E-06 | 0.004949335 |
| 1349.799974 | 161.226855 | 3.63867E-06 | 0.004911471 |
| 1349.839974 | 165.524713 | 3.73566E-06 | 0.005042546 |
| 1349.879974 | 167.181178 | 3.77305E-06 | 0.00509316  |
| 1349.919974 | 149.108003 | 3.36516E-06 | 0.004542697 |
| 1349.959974 | 155.554515 | 3.51065E-06 | 0.004739235 |
| 1349.999974 | 176.966563 | 3.99389E-06 | 0.00539175  |
| 1350.039974 | 192.059943 | 4.33453E-06 | 0.005851783 |
| 1350.079974 | 212.463707 | 4.79501E-06 | 0.006473647 |
| 1350.119974 | 237.384542 | 5.35744E-06 | 0.007233185 |
| 1350.159974 | 251.952954 | 5.68623E-06 | 0.007677316 |
| 1350.199974 | 223.245194 | 5.03833E-06 | 0.006802757 |
| 1350.239974 | 215.16211  | 4.85591E-06 | 0.006556643 |
| 1350.279974 | 220.952578 | 4.98659E-06 | 0.006733295 |
| 1350.319974 | 227.246116 | 5.12863E-06 | 0.006925289 |
| 1350.359974 | 226.900599 | 5.12083E-06 | 0.006914965 |
| 1350.399974 | 202.875159 | 4.57861E-06 | 0.006182954 |
| 1350.439974 | 187.470426 | 4.23095E-06 | 0.005713639 |
| 1350.479974 | 202.664687 | 4.57386E-06 | 0.006176906 |
| 1350.519974 | 184.070913 | 4.15422E-06 | 0.005610363 |
| 1350.559974 | 175.728087 | 3.96594E-06 | 0.005356237 |
| 1350.599974 | 175.988982 | 3.97183E-06 | 0.005364348 |
| 1350.639974 | 188.482799 | 4.25379E-06 | 0.005745345 |
| 1350.679974 | 212.831309 | 4.80331E-06 | 0.006487729 |
| 1350.719974 | 231.564793 | 5.22609E-06 | 0.007058991 |
| 1350.759974 | 226.074188 | 5.10218E-06 | 0.00689182  |
| 1350.799974 | 197.246008 | 4.45157E-06 | 0.006013177 |
| 1350.839974 | 173.957562 | 3.92598E-06 | 0.005303371 |
| 1350.879974 | 187.948898 | 4.24174E-06 | 0.005730088 |
| 1350.919974 | 194.48043  | 4.38915E-06 | 0.005929394 |
| 1350.959974 | 192.616413 | 4.34708E-06 | 0.005872737 |
| 1350.999974 | 194.552501 | 4.39078E-06 | 0.005931942 |
| 1351.039974 | 189.638842 | 4.27988E-06 | 0.005782295 |
| 1351.079974 | 183.043486 | 4.13104E-06 | 0.005581361 |
| 1351.119974 | 176.3301   | 3.97952E-06 | 0.005376815 |
| 1351.159974 | 184.860296 | 4.17204E-06 | 0.005637093 |
| 1351.199974 | 208.211575 | 4.69905E-06 | 0.00634935  |
| 1351.239974 | 245.396333 | 5.53825E-06 | 0.007483509 |
| 1351.279974 | 268.363791 | 6.0566E-06  | 0.008184158 |
| 1351.319974 | 268.010669 | 6.04863E-06 | 0.008173631 |
| 1351.359974 | 254.256919 | 5.73822E-06 | 0.007754407 |
| 1351.399974 | 226.904239 | 5.12091E-06 | 0.006920401 |
| 1351.439974 | 203.914917 | 4.60208E-06 | 0.006219429 |
| 1351.479974 | 191.978508 | 4.33269E-06 | 0.00585554  |
| 1351.519974 | 181.87712  | 4.10471E-06 | 0.005547602 |

|             |            |             |             |
|-------------|------------|-------------|-------------|
| 1351.559974 | 171.797948 | 3.87724E-06 | 0.005240323 |
| 1351.599974 | 164.512672 | 3.71282E-06 | 0.00501825  |
| 1351.639974 | 165.806428 | 3.74202E-06 | 0.005057864 |
| 1351.679974 | 179.066112 | 4.04127E-06 | 0.005462507 |
| 1351.719974 | 188.232914 | 4.24815E-06 | 0.005742316 |
| 1351.759974 | 184.734117 | 4.16919E-06 | 0.005635746 |
| 1351.799974 | 182.224001 | 4.11254E-06 | 0.005559334 |
| 1351.839974 | 187.341146 | 4.22803E-06 | 0.005715618 |
| 1351.879974 | 194.895671 | 4.39852E-06 | 0.005946276 |
| 1351.919974 | 200.741009 | 4.53044E-06 | 0.006124799 |
| 1351.959974 | 209.48799  | 4.72785E-06 | 0.006391867 |
| 1351.999974 | 205.941859 | 4.64782E-06 | 0.006283854 |
| 1352.039974 | 188.787868 | 4.26068E-06 | 0.005760609 |
| 1352.079974 | 204.189884 | 4.60828E-06 | 0.006230765 |
| 1352.119974 | 213.020352 | 4.80757E-06 | 0.006500415 |
| 1352.159974 | 230.591348 | 5.20413E-06 | 0.00703681  |
| 1352.199974 | 261.355268 | 5.89842E-06 | 0.007975849 |
| 1352.239974 | 255.439298 | 5.76491E-06 | 0.007795541 |
| 1352.279974 | 242.279894 | 5.46792E-06 | 0.007394158 |
| 1352.319974 | 249.749685 | 5.6365E-06  | 0.007622355 |
| 1352.359974 | 244.850008 | 5.52592E-06 | 0.007473038 |
| 1352.399974 | 227.931828 | 5.1441E-06  | 0.006956886 |
| 1352.439974 | 201.579955 | 4.54938E-06 | 0.006152762 |
| 1352.479974 | 196.501467 | 4.43476E-06 | 0.00599793  |
| 1352.519974 | 194.528072 | 4.39023E-06 | 0.005937871 |
| 1352.559974 | 183.195943 | 4.13448E-06 | 0.005592128 |
| 1352.599974 | 153.196017 | 3.45742E-06 | 0.004676507 |
| 1352.639974 | 154.870881 | 3.49522E-06 | 0.004727774 |
| 1352.679974 | 171.670941 | 3.87437E-06 | 0.005240788 |
| 1352.719974 | 188.859751 | 4.2623E-06  | 0.0057657   |
| 1352.759974 | 202.558408 | 4.57146E-06 | 0.00618409  |
| 1352.799974 | 205.033866 | 4.62733E-06 | 0.00625985  |
| 1352.839974 | 196.939635 | 4.44465E-06 | 0.006012905 |
| 1352.879974 | 187.292864 | 4.22694E-06 | 0.005718541 |
| 1352.919974 | 184.356979 | 4.16068E-06 | 0.005629067 |
| 1352.959974 | 187.008812 | 4.22053E-06 | 0.005710206 |
| 1352.999974 | 186.305991 | 4.20467E-06 | 0.005688914 |
| 1353.039974 | 198.416545 | 4.47799E-06 | 0.006058893 |
| 1353.079974 | 209.246306 | 4.7224E-06  | 0.006389782 |
| 1353.119974 | 217.601109 | 4.91095E-06 | 0.00664511  |
| 1353.159974 | 234.942948 | 5.30234E-06 | 0.007174908 |
| 1353.199974 | 274.691417 | 6.1994E-06  | 0.008389032 |
| 1353.239974 | 329.414851 | 7.43443E-06 | 0.010060574 |
| 1353.279974 | 366.899801 | 8.28042E-06 | 0.011205723 |
| 1353.319974 | 365.824698 | 8.25615E-06 | 0.011173218 |
| 1353.359974 | 335.891348 | 7.5806E-06  | 0.01025928  |

|             |            |             |             |
|-------------|------------|-------------|-------------|
| 1353.399974 | 297.485704 | 6.71384E-06 | 0.009086508 |
| 1353.439974 | 279.899189 | 6.31693E-06 | 0.008549592 |
| 1353.479974 | 269.466895 | 6.08149E-06 | 0.008231178 |
| 1353.519974 | 228.630836 | 5.15988E-06 | 0.006984    |
| 1353.559974 | 171.397995 | 3.86821E-06 | 0.00523586  |
| 1353.599974 | 128.982546 | 2.91096E-06 | 0.003940271 |
| 1353.639974 | 104.763575 | 2.36437E-06 | 0.003200503 |
| 1353.679974 | 101.608902 | 2.29317E-06 | 0.00310422  |
| 1353.719974 | 136.126246 | 3.07218E-06 | 0.004158871 |
| 1353.759974 | 163.484585 | 3.68962E-06 | 0.004994859 |
| 1353.799974 | 158.969854 | 3.58773E-06 | 0.004857066 |
| 1353.839974 | 153.81406  | 3.47137E-06 | 0.004699678 |
| 1353.879974 | 175.458818 | 3.95986E-06 | 0.005361177 |
| 1353.919974 | 193.476732 | 4.3665E-06  | 0.005911892 |
| 1353.959974 | 191.543278 | 4.32286E-06 | 0.005852986 |
| 1353.999974 | 196.567173 | 4.43625E-06 | 0.006006679 |
| 1354.039974 | 200.121568 | 4.51647E-06 | 0.006115474 |
| 1354.079974 | 188.606493 | 4.25659E-06 | 0.005763758 |
| 1354.119974 | 183.273309 | 4.13622E-06 | 0.005600943 |
| 1354.159974 | 214.007015 | 4.82984E-06 | 0.006540376 |
| 1354.199974 | 251.233084 | 5.66998E-06 | 0.007678288 |
| 1354.239974 | 273.97146  | 6.18315E-06 | 0.008373475 |
| 1354.279974 | 303.996027 | 6.86077E-06 | 0.009291399 |
| 1354.319974 | 315.540809 | 7.12132E-06 | 0.009644541 |
| 1354.359974 | 301.973066 | 6.81511E-06 | 0.009230114 |
| 1354.399974 | 273.033423 | 6.16198E-06 | 0.008345791 |
| 1354.439974 | 227.529516 | 5.13502E-06 | 0.006955082 |
| 1354.479974 | 201.694261 | 4.55196E-06 | 0.006165537 |
| 1354.519974 | 200.035919 | 4.51453E-06 | 0.006115024 |
| 1354.559974 | 180.179852 | 4.06641E-06 | 0.005508194 |
| 1354.599974 | 165.915793 | 3.74449E-06 | 0.005072284 |
| 1354.639974 | 169.504653 | 3.82548E-06 | 0.005182153 |
| 1354.679974 | 180.497273 | 4.07357E-06 | 0.005518386 |
| 1354.719974 | 182.209209 | 4.11221E-06 | 0.00557089  |
| 1354.759974 | 168.897388 | 3.81178E-06 | 0.005164045 |
| 1354.799974 | 168.560604 | 3.80418E-06 | 0.0051539   |
| 1354.839974 | 173.455996 | 3.91466E-06 | 0.005303738 |
| 1354.879974 | 192.297383 | 4.33988E-06 | 0.005880022 |
| 1354.919974 | 221.452617 | 4.99788E-06 | 0.006771724 |
| 1354.959974 | 214.379851 | 4.83825E-06 | 0.006555641 |
| 1354.999974 | 205.625262 | 4.64068E-06 | 0.006288116 |
| 1355.039974 | 181.621277 | 4.09894E-06 | 0.005554227 |
| 1355.079974 | 191.591808 | 4.32396E-06 | 0.005859312 |
| 1355.119974 | 231.021229 | 5.21383E-06 | 0.007065362 |
| 1355.159974 | 255.367622 | 5.76329E-06 | 0.007810182 |
| 1355.199974 | 280.333312 | 6.32673E-06 | 0.008573988 |



|             |            |             |             |
|-------------|------------|-------------|-------------|
| 1355.239974 | 324.363679 | 7.32044E-06 | 0.009920948 |
| 1355.279974 | 337.641927 | 7.62011E-06 | 0.01032738  |
| 1355.319974 | 313.909059 | 7.08449E-06 | 0.009601751 |
| 1355.359974 | 282.586657 | 6.37759E-06 | 0.008643926 |
| 1355.399974 | 256.078471 | 5.77933E-06 | 0.00783331  |
| 1355.439974 | 234.020019 | 5.28151E-06 | 0.007158764 |
| 1355.479974 | 210.421769 | 4.74893E-06 | 0.006437074 |
| 1355.519974 | 210.623137 | 4.75347E-06 | 0.006443425 |
| 1355.559974 | 196.999593 | 4.44601E-06 | 0.006026828 |
| 1355.599974 | 184.484697 | 4.16356E-06 | 0.005644125 |
| 1355.639974 | 178.79127  | 4.03507E-06 | 0.005470102 |
| 1355.679974 | 184.975461 | 4.17464E-06 | 0.005659474 |
| 1355.719974 | 174.573449 | 3.93988E-06 | 0.005341373 |
| 1355.759974 | 180.317646 | 4.06952E-06 | 0.00551729  |
| 1355.799974 | 199.51966  | 4.50288E-06 | 0.006105006 |
| 1355.839974 | 193.682225 | 4.37114E-06 | 0.005926564 |
| 1355.879974 | 175.151515 | 3.95293E-06 | 0.005359693 |
| 1355.919974 | 162.326008 | 3.66347E-06 | 0.004967375 |
| 1355.959974 | 159.318587 | 3.5956E-06  | 0.004875488 |
| 1355.999974 | 152.753883 | 3.44744E-06 | 0.004674732 |
| 1356.039974 | 151.578461 | 3.42091E-06 | 0.004638897 |
| 1356.079974 | 165.914899 | 3.74447E-06 | 0.005077798 |
| 1356.119974 | 202.074983 | 4.56055E-06 | 0.006184654 |
| 1356.159974 | 222.239893 | 5.01564E-06 | 0.006802017 |
| 1356.199974 | 236.769324 | 5.34355E-06 | 0.007246928 |
| 1356.239974 | 261.564198 | 5.90314E-06 | 0.008006074 |
| 1356.279974 | 290.072756 | 6.54654E-06 | 0.008878938 |
| 1356.319974 | 286.998734 | 6.47716E-06 | 0.008785104 |
| 1356.359974 | 277.039712 | 6.2524E-06  | 0.008480506 |
| 1356.399974 | 269.210336 | 6.0757E-06  | 0.008241082 |
| 1356.439974 | 257.540673 | 5.81233E-06 | 0.007884083 |
| 1356.479974 | 231.562141 | 5.22603E-06 | 0.007089012 |
| 1356.519974 | 193.268872 | 4.36181E-06 | 0.005916881 |
| 1356.559974 | 169.591411 | 3.82744E-06 | 0.005192155 |
| 1356.599974 | 176.277718 | 3.97834E-06 | 0.005397019 |
| 1356.639974 | 190.033848 | 4.2888E-06  | 0.005818357 |
| 1356.679974 | 178.730255 | 4.03369E-06 | 0.00547243  |
| 1356.719974 | 175.26715  | 3.95554E-06 | 0.005366554 |
| 1356.759974 | 179.849681 | 4.05896E-06 | 0.00550703  |
| 1356.799974 | 182.68274  | 4.12289E-06 | 0.005593944 |
| 1356.839974 | 171.942246 | 3.8805E-06  | 0.005265213 |
| 1356.879974 | 171.83295  | 3.87803E-06 | 0.005262022 |
| 1356.919974 | 171.099965 | 3.86149E-06 | 0.00523973  |
| 1356.959974 | 185.934694 | 4.19629E-06 | 0.005694194 |
| 1356.999974 | 217.390239 | 4.90619E-06 | 0.006657706 |
| 1357.039974 | 224.397503 | 5.06434E-06 | 0.006872511 |

|             |            |             |             |
|-------------|------------|-------------|-------------|
| 1357.079974 | 224.482861 | 5.06627E-06 | 0.006875327 |
| 1357.119974 | 256.134353 | 5.7806E-06  | 0.007844962 |
| 1357.159974 | 281.905305 | 6.36221E-06 | 0.008634537 |
| 1357.199974 | 320.798363 | 7.23997E-06 | 0.00982609  |
| 1357.239974 | 373.221278 | 8.42308E-06 | 0.011432147 |
| 1357.279974 | 382.127162 | 8.62408E-06 | 0.011705288 |
| 1357.319974 | 336.985335 | 7.60529E-06 | 0.010322812 |
| 1357.359974 | 301.483073 | 6.80405E-06 | 0.009235549 |
| 1357.399974 | 278.203725 | 6.27867E-06 | 0.008522667 |
| 1357.439974 | 263.772807 | 5.95298E-06 | 0.00808082  |
| 1357.479974 | 250.342786 | 5.64989E-06 | 0.00766961  |
| 1357.519974 | 219.581913 | 4.95566E-06 | 0.006727405 |
| 1357.559974 | 197.917478 | 4.46672E-06 | 0.006063843 |
| 1357.599974 | 183.970868 | 4.15197E-06 | 0.005636709 |
| 1357.639974 | 177.150937 | 3.99805E-06 | 0.005427912 |
| 1357.679974 | 174.315332 | 3.93405E-06 | 0.005341187 |
| 1357.719974 | 176.038417 | 3.97294E-06 | 0.005394143 |
| 1357.759974 | 170.379398 | 3.84523E-06 | 0.005220894 |
| 1357.799974 | 166.388519 | 3.75516E-06 | 0.005098752 |
| 1357.839974 | 177.035441 | 3.99544E-06 | 0.005425173 |
| 1357.879974 | 209.697634 | 4.73258E-06 | 0.00642628  |
| 1357.919974 | 231.608402 | 5.22708E-06 | 0.007097955 |
| 1357.959974 | 238.579559 | 5.38441E-06 | 0.007311811 |
| 1357.999974 | 227.7196   | 5.13931E-06 | 0.006979189 |
| 1358.039974 | 220.735372 | 4.98169E-06 | 0.006765334 |
| 1358.079974 | 221.722738 | 5.00397E-06 | 0.006795796 |
| 1358.119974 | 234.70044  | 5.29686E-06 | 0.007193774 |
| 1358.159974 | 254.81504  | 5.75082E-06 | 0.007810534 |
| 1358.199974 | 262.037808 | 5.91383E-06 | 0.008032161 |
| 1358.239974 | 283.81799  | 6.40538E-06 | 0.008700039 |
| 1358.279974 | 296.211853 | 6.68509E-06 | 0.009080222 |
| 1358.319974 | 295.175028 | 6.66169E-06 | 0.009048706 |
| 1358.359974 | 292.345169 | 6.59782E-06 | 0.008962219 |
| 1358.399974 | 274.008823 | 6.184E-06   | 0.008400342 |
| 1358.439974 | 254.331849 | 5.73992E-06 | 0.007797331 |
| 1358.479974 | 229.723506 | 5.18454E-06 | 0.007043093 |
| 1358.519974 | 214.847236 | 4.8488E-06  | 0.006587196 |
| 1358.559974 | 188.562648 | 4.2556E-06  | 0.005781483 |
| 1358.599974 | 188.041726 | 4.24384E-06 | 0.005765681 |
| 1358.639974 | 190.320197 | 4.29526E-06 | 0.005835714 |
| 1358.679974 | 156.601478 | 3.53428E-06 | 0.004801952 |
| 1358.719974 | 158.255834 | 3.57161E-06 | 0.004852823 |
| 1358.759974 | 177.690883 | 4.01024E-06 | 0.005448948 |
| 1358.799974 | 186.030819 | 4.19846E-06 | 0.005704863 |
| 1358.839974 | 184.375598 | 4.1611E-06  | 0.00565427  |
| 1358.879974 | 154.569946 | 3.48843E-06 | 0.004740355 |

|             |            |             |             |
|-------------|------------|-------------|-------------|
| 1358.919974 | 143.0911   | 3.22937E-06 | 0.004388451 |
| 1358.959974 | 146.576226 | 3.30802E-06 | 0.004495468 |
| 1358.999974 | 155.159724 | 3.50174E-06 | 0.004758863 |
| 1359.039974 | 191.884864 | 4.33057E-06 | 0.005885423 |
| 1359.079974 | 218.058325 | 4.92127E-06 | 0.006688403 |
| 1359.119974 | 236.500026 | 5.33748E-06 | 0.00725427  |
| 1359.159974 | 253.417519 | 5.71928E-06 | 0.007773417 |
| 1359.199974 | 275.075695 | 6.20808E-06 | 0.008438016 |
| 1359.239974 | 298.964006 | 6.7472E-06  | 0.009171066 |
| 1359.279974 | 302.651399 | 6.83042E-06 | 0.009284454 |
| 1359.319974 | 320.194662 | 7.22635E-06 | 0.009822919 |
| 1359.359974 | 317.620617 | 7.16825E-06 | 0.009744239 |
| 1359.399974 | 273.035294 | 6.16203E-06 | 0.008376658 |
| 1359.439974 | 238.130167 | 5.37427E-06 | 0.007305992 |
| 1359.479974 | 220.178918 | 4.96913E-06 | 0.006755435 |
| 1359.519974 | 185.438299 | 4.18508E-06 | 0.005689705 |
| 1359.559974 | 161.027012 | 3.63416E-06 | 0.004940852 |
| 1359.599974 | 165.53419  | 3.73588E-06 | 0.005079297 |
| 1359.639974 | 160.845362 | 3.63006E-06 | 0.004935569 |
| 1359.679974 | 142.944649 | 3.22606E-06 | 0.004386411 |
| 1359.719974 | 138.570641 | 3.12735E-06 | 0.004252315 |
| 1359.759974 | 159.529452 | 3.60036E-06 | 0.004895622 |
| 1359.799974 | 175.44619  | 3.95958E-06 | 0.005384232 |
| 1359.839974 | 171.81821  | 3.8777E-06  | 0.005273048 |
| 1359.879974 | 169.397454 | 3.82306E-06 | 0.005198909 |
| 1359.919974 | 170.597794 | 3.85015E-06 | 0.005235902 |
| 1359.959974 | 171.424887 | 3.86882E-06 | 0.005261442 |
| 1359.999974 | 185.45361  | 4.18543E-06 | 0.005692184 |
| 1360.039974 | 199.070669 | 4.49275E-06 | 0.006110316 |
| 1360.079974 | 200.716951 | 4.5299E-06  | 0.006161029 |
| 1360.119974 | 201.591751 | 4.54965E-06 | 0.006188063 |
| 1360.159974 | 221.196702 | 4.9921E-06  | 0.006790057 |
| 1360.199974 | 237.360427 | 5.35689E-06 | 0.007286447 |
| 1360.239974 | 254.288593 | 5.73894E-06 | 0.007806335 |
| 1360.279974 | 273.755212 | 6.17827E-06 | 0.008404182 |
| 1360.319974 | 282.839655 | 6.3833E-06  | 0.008683326 |
| 1360.359974 | 278.882575 | 6.29399E-06 | 0.008562094 |
| 1360.399974 | 278.220035 | 6.27904E-06 | 0.008542004 |
| 1360.439974 | 246.588455 | 5.56516E-06 | 0.007571063 |
| 1360.479974 | 201.665294 | 4.5513E-06  | 0.006191959 |
| 1360.519974 | 169.88512  | 3.83407E-06 | 0.00521633  |
| 1360.559974 | 158.458108 | 3.57618E-06 | 0.004865606 |
| 1360.599974 | 149.359418 | 3.37083E-06 | 0.004586357 |
| 1360.639974 | 134.126558 | 3.02705E-06 | 0.004118725 |
| 1360.679974 | 140.16967  | 3.16343E-06 | 0.004304422 |
| 1360.719974 | 153.963045 | 3.47473E-06 | 0.004728137 |

|             |            |             |             |
|-------------|------------|-------------|-------------|
| 1360.759974 | 161.471567 | 3.64419E-06 | 0.004958866 |
| 1360.799974 | 170.836388 | 3.85554E-06 | 0.005246618 |
| 1360.839974 | 158.506956 | 3.57728E-06 | 0.004868107 |
| 1360.879974 | 158.720129 | 3.58209E-06 | 0.004874798 |
| 1360.919974 | 173.069274 | 3.90593E-06 | 0.005315661 |
| 1360.959974 | 172.288636 | 3.88831E-06 | 0.00529184  |
| 1360.999974 | 158.831336 | 3.5846E-06  | 0.004878643 |
| 1361.039974 | 175.424363 | 3.95908E-06 | 0.005388471 |
| 1361.079974 | 213.488363 | 4.81813E-06 | 0.006557867 |
| 1361.119974 | 243.775952 | 5.50168E-06 | 0.007488452 |
| 1361.159974 | 245.509475 | 5.54081E-06 | 0.007541925 |
| 1361.199974 | 248.331903 | 5.60451E-06 | 0.007628852 |
| 1361.239974 | 263.021609 | 5.93603E-06 | 0.008080363 |
| 1361.279974 | 283.468628 | 6.39749E-06 | 0.008708778 |
| 1361.319974 | 278.436253 | 6.28392E-06 | 0.008554424 |
| 1361.359974 | 258.679323 | 5.83803E-06 | 0.007947663 |
| 1361.399974 | 232.740643 | 5.25263E-06 | 0.007150933 |
| 1361.439974 | 202.335442 | 4.56643E-06 | 0.006216919 |
| 1361.479974 | 192.789192 | 4.35098E-06 | 0.005923777 |
| 1361.519974 | 177.52559  | 4.00651E-06 | 0.005454937 |
| 1361.559974 | 174.35231  | 3.93489E-06 | 0.005357587 |
| 1361.599974 | 170.326507 | 3.84403E-06 | 0.005234034 |
| 1361.639974 | 175.687746 | 3.96503E-06 | 0.00539894  |
| 1361.679974 | 194.020771 | 4.37878E-06 | 0.005962495 |
| 1361.719974 | 209.886078 | 4.73684E-06 | 0.006450245 |
| 1361.759974 | 200.360146 | 4.52185E-06 | 0.006157674 |
| 1361.799974 | 184.706372 | 4.16857E-06 | 0.005676752 |
| 1361.839974 | 182.190605 | 4.11179E-06 | 0.005599598 |
| 1361.879974 | 179.890912 | 4.05989E-06 | 0.005529079 |
| 1361.919974 | 178.750789 | 4.03416E-06 | 0.005494198 |
| 1361.959974 | 192.547701 | 4.34553E-06 | 0.005918443 |
| 1361.999974 | 200.985876 | 4.53597E-06 | 0.006177993 |
| 1362.039974 | 183.739713 | 4.14675E-06 | 0.005648038 |
| 1362.079974 | 165.289719 | 3.73036E-06 | 0.005081047 |
| 1362.119974 | 165.942713 | 3.7451E-06  | 0.00510127  |
| 1362.159974 | 190.576475 | 4.30105E-06 | 0.005858712 |
| 1362.199974 | 232.328649 | 5.24333E-06 | 0.007142469 |
| 1362.239974 | 257.579354 | 5.81321E-06 | 0.007918983 |
| 1362.279974 | 287.641192 | 6.49166E-06 | 0.00884346  |
| 1362.319974 | 289.056129 | 6.52359E-06 | 0.008887223 |
| 1362.359974 | 259.498925 | 5.85653E-06 | 0.007978701 |
| 1362.399974 | 225.312197 | 5.08498E-06 | 0.00692778  |
| 1362.439974 | 195.274746 | 4.40708E-06 | 0.006004381 |
| 1362.479974 | 182.236765 | 4.11283E-06 | 0.005603648 |
| 1362.519974 | 195.989104 | 4.4232E-06  | 0.0060267   |
| 1362.559974 | 193.471437 | 4.36638E-06 | 0.005949456 |

|             |            |             |             |
|-------------|------------|-------------|-------------|
| 1362.599974 | 172.978273 | 3.90388E-06 | 0.005319425 |
| 1362.639974 | 183.5063   | 4.14148E-06 | 0.005643348 |
| 1362.679974 | 182.976653 | 4.12953E-06 | 0.005627225 |
| 1362.719974 | 179.043127 | 4.04075E-06 | 0.005506416 |
| 1362.759974 | 176.57829  | 3.98513E-06 | 0.00543077  |
| 1362.799974 | 177.757732 | 4.01174E-06 | 0.005467205 |
| 1362.839974 | 187.162    | 4.22399E-06 | 0.005756616 |
| 1362.879974 | 180.495471 | 4.07353E-06 | 0.005551734 |
| 1362.919974 | 166.627007 | 3.76054E-06 | 0.005125314 |
| 1362.959974 | 183.181434 | 4.13415E-06 | 0.005634681 |
| 1362.999974 | 176.449461 | 3.98222E-06 | 0.005427764 |
| 1363.039974 | 170.300107 | 3.84344E-06 | 0.005238757 |
| 1363.079974 | 168.296366 | 3.79821E-06 | 0.00517727  |
| 1363.119974 | 161.205415 | 3.63818E-06 | 0.004959278 |
| 1363.159974 | 197.606345 | 4.4597E-06  | 0.006079284 |
| 1363.199974 | 260.346933 | 5.87567E-06 | 0.00800971  |
| 1363.239974 | 273.396194 | 6.17017E-06 | 0.008411424 |
| 1363.279974 | 266.239998 | 6.00867E-06 | 0.008191494 |
| 1363.319974 | 269.527986 | 6.08287E-06 | 0.0082929   |
| 1363.359974 | 237.643134 | 5.36327E-06 | 0.007312074 |
| 1363.399974 | 218.023813 | 4.92049E-06 | 0.006708601 |
| 1363.439974 | 220.821306 | 4.98363E-06 | 0.006794879 |
| 1363.479974 | 193.651526 | 4.37045E-06 | 0.005959015 |
| 1363.519974 | 161.562862 | 3.64625E-06 | 0.004971733 |
| 1363.559974 | 152.065435 | 3.43191E-06 | 0.004679608 |
| 1363.599974 | 164.329191 | 3.70868E-06 | 0.005057157 |
| 1363.639974 | 163.279234 | 3.68498E-06 | 0.005024993 |
| 1363.679974 | 154.832625 | 3.49436E-06 | 0.004765184 |
| 1363.719974 | 135.504198 | 3.05814E-06 | 0.004170448 |
| 1363.759974 | 126.455598 | 2.85393E-06 | 0.003892071 |
| 1363.799974 | 131.761752 | 2.97368E-06 | 0.004055504 |
| 1363.839974 | 136.26358  | 3.07528E-06 | 0.004194189 |
| 1363.879974 | 138.513297 | 3.12605E-06 | 0.00426356  |
| 1363.919974 | 144.743413 | 3.26666E-06 | 0.004455459 |
| 1363.959974 | 157.962378 | 3.56499E-06 | 0.004862505 |
| 1363.999974 | 159.286248 | 3.59487E-06 | 0.004903401 |
| 1364.039974 | 163.140153 | 3.68185E-06 | 0.005022185 |
| 1364.079974 | 176.474509 | 3.98278E-06 | 0.005432836 |
| 1364.119974 | 214.727415 | 4.8461E-06  | 0.00661066  |
| 1364.159974 | 226.180748 | 5.10458E-06 | 0.00696347  |
| 1364.199974 | 209.214292 | 4.72168E-06 | 0.006441309 |
| 1364.239974 | 200.493327 | 4.52486E-06 | 0.006172988 |
| 1364.279974 | 214.089398 | 4.8317E-06  | 0.006591791 |
| 1364.319974 | 233.927148 | 5.27941E-06 | 0.007202804 |
| 1364.359974 | 223.183645 | 5.03694E-06 | 0.006872205 |
| 1364.399974 | 200.804152 | 4.53187E-06 | 0.006183283 |

|             |            |             |             |
|-------------|------------|-------------|-------------|
| 1364.439974 | 222.705734 | 5.02616E-06 | 0.006857891 |
| 1364.479974 | 215.979611 | 4.87436E-06 | 0.006650965 |
| 1364.519974 | 188.16349  | 4.24659E-06 | 0.005794554 |
| 1364.559974 | 185.278066 | 4.18147E-06 | 0.005705864 |
| 1364.599974 | 178.896355 | 4.03744E-06 | 0.005509493 |
| 1364.639974 | 179.064428 | 4.04123E-06 | 0.00551483  |
| 1364.679974 | 164.919756 | 3.72201E-06 | 0.005079351 |
| 1364.719974 | 157.496475 | 3.55448E-06 | 0.004850864 |
| 1364.759974 | 173.44799  | 3.91448E-06 | 0.005342325 |
| 1364.799974 | 189.01362  | 4.26577E-06 | 0.005821928 |
| 1364.839974 | 201.792889 | 4.55418E-06 | 0.006215733 |
| 1364.879974 | 190.652397 | 4.30276E-06 | 0.00587275  |
| 1364.919974 | 172.448937 | 3.89193E-06 | 0.005312176 |
| 1364.959974 | 166.098806 | 3.74862E-06 | 0.005116714 |
| 1364.999974 | 163.337189 | 3.68629E-06 | 0.00503179  |
| 1365.039974 | 156.273373 | 3.52687E-06 | 0.004814322 |
| 1365.079974 | 183.34063  | 4.13774E-06 | 0.00564835  |
| 1365.119974 | 207.310534 | 4.67871E-06 | 0.006387    |
| 1365.159974 | 205.617861 | 4.64051E-06 | 0.006335037 |
| 1365.199974 | 207.064606 | 4.67316E-06 | 0.006379798 |
| 1365.239974 | 215.918268 | 4.87297E-06 | 0.00665278  |
| 1365.279974 | 247.580688 | 5.58755E-06 | 0.007628572 |
| 1365.319974 | 273.114784 | 6.16382E-06 | 0.008415587 |
| 1365.359974 | 250.697461 | 5.65789E-06 | 0.00772506  |
| 1365.399974 | 211.879405 | 4.78182E-06 | 0.006529101 |
| 1365.439974 | 173.262131 | 3.91028E-06 | 0.005339259 |
| 1365.479974 | 148.806075 | 3.35835E-06 | 0.004585754 |
| 1365.519974 | 153.591226 | 3.46634E-06 | 0.004733357 |
| 1365.559974 | 186.602324 | 4.21135E-06 | 0.005750857 |
| 1365.599974 | 203.447367 | 4.59152E-06 | 0.006270185 |
| 1365.639974 | 172.937594 | 3.90296E-06 | 0.005330039 |
| 1365.679974 | 157.196844 | 3.54771E-06 | 0.004845042 |
| 1365.719974 | 153.817932 | 3.47146E-06 | 0.004741037 |
| 1365.759974 | 160.64605  | 3.62556E-06 | 0.004951641 |
| 1365.799974 | 168.58488  | 3.80473E-06 | 0.005196495 |
| 1365.839974 | 172.687492 | 3.89732E-06 | 0.00532311  |
| 1365.879974 | 174.776257 | 3.94446E-06 | 0.005387654 |
| 1365.919974 | 178.551198 | 4.02965E-06 | 0.005504182 |
| 1365.959974 | 171.246465 | 3.86479E-06 | 0.005279154 |
| 1365.999974 | 175.409741 | 3.95875E-06 | 0.005407657 |
| 1366.039974 | 200.052173 | 4.5149E-06  | 0.006167532 |
| 1366.079974 | 190.712231 | 4.30411E-06 | 0.005879758 |
| 1366.119974 | 173.739084 | 3.92105E-06 | 0.005356624 |
| 1366.159974 | 182.54139  | 4.1197E-06  | 0.005628176 |
| 1366.199974 | 195.990517 | 4.42323E-06 | 0.006043021 |
| 1366.239974 | 209.340715 | 4.72453E-06 | 0.006454839 |

|             |            |             |             |
|-------------|------------|-------------|-------------|
| 1366.279974 | 235.342301 | 5.31135E-06 | 0.007256788 |
| 1366.319974 | 235.918606 | 5.32435E-06 | 0.007274772 |
| 1366.359974 | 217.027727 | 4.89801E-06 | 0.00669245  |
| 1366.399974 | 227.262205 | 5.12899E-06 | 0.007008254 |
| 1366.439974 | 248.270031 | 5.60311E-06 | 0.007656312 |
| 1366.479974 | 238.250581 | 5.37698E-06 | 0.007347541 |
| 1366.519974 | 213.261395 | 4.81301E-06 | 0.006577078 |
| 1366.559974 | 182.906355 | 4.12794E-06 | 0.00564108  |
| 1366.599974 | 167.722199 | 3.78526E-06 | 0.005172931 |
| 1366.639974 | 171.006559 | 3.85938E-06 | 0.005274383 |
| 1366.679974 | 176.056429 | 3.97335E-06 | 0.005430296 |
| 1366.719974 | 202.898291 | 4.57913E-06 | 0.006258391 |
| 1366.759974 | 222.837097 | 5.02912E-06 | 0.006873604 |
| 1366.799974 | 214.682795 | 4.84509E-06 | 0.006622271 |
| 1366.839974 | 184.241036 | 4.15806E-06 | 0.005683407 |
| 1366.879974 | 163.869981 | 3.69832E-06 | 0.005055156 |
| 1366.919974 | 148.872073 | 3.35984E-06 | 0.004592626 |
| 1366.959974 | 143.299681 | 3.23407E-06 | 0.00442085  |
| 1366.999974 | 145.525361 | 3.2843E-06  | 0.004489644 |
| 1367.039974 | 171.860284 | 3.87865E-06 | 0.005302266 |
| 1367.079974 | 214.974251 | 4.85167E-06 | 0.00663262  |
| 1367.119974 | 236.608428 | 5.33992E-06 | 0.007300315 |
| 1367.159974 | 227.543677 | 5.13534E-06 | 0.007020837 |
| 1367.199974 | 242.460809 | 5.472E-06   | 0.007481322 |
| 1367.239974 | 264.626198 | 5.97224E-06 | 0.008165492 |
| 1367.279974 | 302.326417 | 6.82309E-06 | 0.009329069 |
| 1367.319974 | 326.620867 | 7.37138E-06 | 0.010079032 |
| 1367.359974 | 305.746448 | 6.90027E-06 | 0.009435155 |
| 1367.399974 | 272.729301 | 6.15512E-06 | 0.008416512 |
| 1367.439974 | 255.505951 | 5.76641E-06 | 0.007885224 |
| 1367.479974 | 209.505059 | 4.72824E-06 | 0.00646577  |
| 1367.519974 | 170.912237 | 3.85725E-06 | 0.005274868 |
| 1367.559974 | 154.654418 | 3.49033E-06 | 0.004773242 |
| 1367.599974 | 142.915324 | 3.2254E-06  | 0.004411057 |
| 1367.639974 | 140.800974 | 3.17768E-06 | 0.004345925 |
| 1367.679974 | 142.789053 | 3.22255E-06 | 0.004407417 |
| 1367.719974 | 144.928521 | 3.27083E-06 | 0.004473586 |
| 1367.759974 | 149.080742 | 3.36454E-06 | 0.00460189  |
| 1367.799974 | 157.595899 | 3.55672E-06 | 0.004864881 |
| 1367.839974 | 171.511376 | 3.87077E-06 | 0.005294598 |
| 1367.879974 | 167.696317 | 3.78467E-06 | 0.005176977 |
| 1367.919974 | 153.733569 | 3.46955E-06 | 0.00474607  |
| 1367.959974 | 151.587063 | 3.42111E-06 | 0.00467994  |
| 1367.999974 | 174.169483 | 3.93076E-06 | 0.005377283 |
| 1368.039974 | 193.85106  | 4.37495E-06 | 0.005985104 |
| 1368.079974 | 211.892704 | 4.78212E-06 | 0.006542327 |

|             |            |             |             |
|-------------|------------|-------------|-------------|
| 1368.119974 | 215.890905 | 4.87236E-06 | 0.006665969 |
| 1368.159974 | 220.897692 | 4.98535E-06 | 0.006820761 |
| 1368.199974 | 235.326164 | 5.31098E-06 | 0.007266488 |
| 1368.239974 | 253.016317 | 5.71023E-06 | 0.007812959 |
| 1368.279974 | 266.280501 | 6.00958E-06 | 0.008222788 |
| 1368.319974 | 257.892609 | 5.82028E-06 | 0.007964001 |
| 1368.359974 | 236.857375 | 5.34554E-06 | 0.007314624 |
| 1368.399974 | 229.162624 | 5.17188E-06 | 0.007077202 |
| 1368.439974 | 195.082939 | 4.40275E-06 | 0.006024899 |
| 1368.479974 | 162.637218 | 3.6705E-06  | 0.005023    |
| 1368.519974 | 176.589776 | 3.98539E-06 | 0.005454079 |
| 1368.559974 | 187.292827 | 4.22694E-06 | 0.005784818 |
| 1368.599974 | 193.207954 | 4.36043E-06 | 0.00596769  |
| 1368.639974 | 181.427624 | 4.09457E-06 | 0.00560399  |
| 1368.679974 | 190.519632 | 4.29976E-06 | 0.005884999 |
| 1368.719974 | 224.108861 | 5.05782E-06 | 0.006922746 |
| 1368.759974 | 240.026126 | 5.41706E-06 | 0.007414649 |
| 1368.799974 | 240.095744 | 5.41863E-06 | 0.007417016 |
| 1368.839974 | 222.779476 | 5.02782E-06 | 0.006882284 |
| 1368.879974 | 215.760125 | 4.86941E-06 | 0.006665632 |
| 1368.919974 | 225.011859 | 5.0782E-06  | 0.006951655 |
| 1368.959974 | 208.87485  | 4.71401E-06 | 0.006453297 |
| 1368.999974 | 193.068802 | 4.35729E-06 | 0.005965135 |
| 1369.039974 | 202.782471 | 4.57652E-06 | 0.006265436 |
| 1369.079974 | 215.232329 | 4.85749E-06 | 0.006650298 |
| 1369.119974 | 239.217738 | 5.39881E-06 | 0.00739162  |
| 1369.159974 | 261.704654 | 5.90631E-06 | 0.008086683 |
| 1369.199974 | 285.43044  | 6.44177E-06 | 0.008820068 |
| 1369.239974 | 298.697966 | 6.7412E-06  | 0.009230316 |
| 1369.279974 | 305.063761 | 6.88486E-06 | 0.009427307 |
| 1369.319974 | 307.191488 | 6.93288E-06 | 0.009493337 |
| 1369.359974 | 292.676025 | 6.60529E-06 | 0.00904502  |
| 1369.399974 | 261.805745 | 5.90859E-06 | 0.008091224 |
| 1369.439974 | 237.176993 | 5.35275E-06 | 0.007330276 |
| 1369.479974 | 220.396085 | 4.97403E-06 | 0.006811838 |
| 1369.519974 | 188.880821 | 4.26278E-06 | 0.005837958 |
| 1369.559974 | 179.505807 | 4.0512E-06  | 0.005548356 |
| 1369.599974 | 165.725543 | 3.74019E-06 | 0.005122571 |
| 1369.639974 | 158.274394 | 3.57203E-06 | 0.004892399 |
| 1369.679974 | 163.033959 | 3.67945E-06 | 0.005039668 |
| 1369.719974 | 156.876198 | 3.54048E-06 | 0.004849462 |
| 1369.759974 | 155.902646 | 3.51851E-06 | 0.004819508 |
| 1369.799974 | 150.131614 | 3.38826E-06 | 0.00464124  |
| 1369.839974 | 143.795569 | 3.24527E-06 | 0.004445495 |
| 1369.879974 | 155.241943 | 3.50359E-06 | 0.004799504 |
| 1369.919974 | 168.694556 | 3.8072E-06  | 0.005215561 |



|             |            |             |             |
|-------------|------------|-------------|-------------|
| 1369.959974 | 160.454012 | 3.62122E-06 | 0.004960931 |
| 1369.999974 | 158.084357 | 3.56774E-06 | 0.004887809 |
| 1370.039974 | 175.904701 | 3.96992E-06 | 0.005438955 |
| 1370.079974 | 207.10768  | 4.67413E-06 | 0.006403934 |
| 1370.119974 | 221.101976 | 4.98996E-06 | 0.006836849 |
| 1370.159974 | 225.926983 | 5.09886E-06 | 0.00698625  |
| 1370.199974 | 230.760023 | 5.20793E-06 | 0.007135909 |
| 1370.239974 | 244.425343 | 5.51634E-06 | 0.007558709 |
| 1370.279974 | 277.677378 | 6.26679E-06 | 0.008587259 |
| 1370.319974 | 260.57623  | 5.88084E-06 | 0.008058636 |
| 1370.359974 | 223.36663  | 5.04107E-06 | 0.006908086 |
| 1370.399974 | 214.417387 | 4.8391E-06  | 0.006631505 |
| 1370.439974 | 209.34188  | 4.72455E-06 | 0.006474719 |
| 1370.479974 | 199.172145 | 4.49504E-06 | 0.006160359 |
| 1370.519974 | 184.33086  | 4.16009E-06 | 0.005701487 |
| 1370.559974 | 164.621757 | 3.71528E-06 | 0.005092019 |
| 1370.599974 | 162.838262 | 3.67503E-06 | 0.005037    |
| 1370.639974 | 167.484518 | 3.77989E-06 | 0.005180871 |
| 1370.679974 | 165.243325 | 3.72931E-06 | 0.005111693 |
| 1370.719974 | 177.181039 | 3.99873E-06 | 0.005481138 |
| 1370.759974 | 194.775218 | 4.39581E-06 | 0.006025594 |
| 1370.799974 | 208.97509  | 4.71628E-06 | 0.006465072 |
| 1370.839974 | 205.978952 | 4.64866E-06 | 0.006372566 |
| 1370.879974 | 197.846147 | 4.46511E-06 | 0.006121133 |
| 1370.919974 | 197.442253 | 4.456E-06   | 0.006108815 |
| 1370.959974 | 209.561755 | 4.72952E-06 | 0.006483978 |
| 1370.999974 | 216.665473 | 4.88984E-06 | 0.006703968 |
| 1371.039974 | 211.610284 | 4.77575E-06 | 0.006547743 |
| 1371.079974 | 205.743161 | 4.64334E-06 | 0.006366386 |
| 1371.119974 | 216.934199 | 4.8959E-06  | 0.00671287  |
| 1371.159974 | 235.82805  | 5.32231E-06 | 0.007297739 |
| 1371.199974 | 243.934557 | 5.50526E-06 | 0.007548817 |
| 1371.239974 | 273.81349  | 6.17959E-06 | 0.0084737   |
| 1371.279974 | 310.354449 | 7.00427E-06 | 0.009604812 |
| 1371.319974 | 320.265854 | 7.22795E-06 | 0.009911838 |
| 1371.359974 | 297.852554 | 6.72212E-06 | 0.009218443 |
| 1371.399974 | 261.094791 | 5.89255E-06 | 0.008081037 |
| 1371.439974 | 235.582086 | 5.31676E-06 | 0.007291617 |
| 1371.479974 | 229.48018  | 5.17905E-06 | 0.007102961 |
| 1371.519974 | 229.118285 | 5.17088E-06 | 0.007091966 |
| 1371.559974 | 207.708904 | 4.6877E-06  | 0.006429463 |
| 1371.599974 | 185.179877 | 4.17925E-06 | 0.005732262 |
| 1371.639974 | 179.483766 | 4.0507E-06  | 0.0055561   |
| 1371.679974 | 171.735348 | 3.87583E-06 | 0.005316395 |
| 1371.719974 | 162.963582 | 3.67786E-06 | 0.005044995 |
| 1371.759974 | 191.853861 | 4.32987E-06 | 0.005939548 |

|             |            |             |             |
|-------------|------------|-------------|-------------|
| 1371.799974 | 220.241356 | 4.97054E-06 | 0.006818588 |
| 1371.839974 | 199.94634  | 4.51251E-06 | 0.006190442 |
| 1371.879974 | 177.860492 | 4.01406E-06 | 0.005506813 |
| 1371.919974 | 166.836    | 3.76526E-06 | 0.00516563  |
| 1371.959974 | 181.000061 | 4.08492E-06 | 0.005604346 |
| 1371.999974 | 190.409429 | 4.29728E-06 | 0.005895862 |
| 1372.039974 | 193.912062 | 4.37633E-06 | 0.006004493 |
| 1372.079974 | 206.251289 | 4.6548E-06  | 0.006386764 |
| 1372.119974 | 221.497793 | 4.9989E-06  | 0.006859086 |
| 1372.159974 | 251.106056 | 5.66711E-06 | 0.007776187 |
| 1372.199974 | 258.312118 | 5.82974E-06 | 0.007999576 |
| 1372.239974 | 250.218305 | 5.64708E-06 | 0.007749147 |
| 1372.279974 | 270.474939 | 6.10424E-06 | 0.00837673  |
| 1372.319974 | 284.862072 | 6.42894E-06 | 0.008822563 |
| 1372.359974 | 262.486112 | 5.92395E-06 | 0.008129786 |
| 1372.399974 | 240.356346 | 5.42451E-06 | 0.007444595 |
| 1372.439974 | 210.899679 | 4.75971E-06 | 0.006532419 |
| 1372.479974 | 176.99125  | 3.99445E-06 | 0.005482297 |
| 1372.519974 | 148.524139 | 3.35198E-06 | 0.004600664 |
| 1372.559974 | 142.683095 | 3.22016E-06 | 0.004419861 |
| 1372.599974 | 159.783248 | 3.60609E-06 | 0.004949713 |
| 1372.639974 | 173.929252 | 3.92534E-06 | 0.00538808  |
| 1372.679974 | 175.023355 | 3.95003E-06 | 0.005422132 |
| 1372.719974 | 166.586824 | 3.75963E-06 | 0.005160923 |
| 1372.759974 | 182.876738 | 4.12727E-06 | 0.005665756 |
| 1372.799974 | 197.327605 | 4.45341E-06 | 0.00611364  |
| 1372.839974 | 185.54932  | 4.18759E-06 | 0.005748891 |
| 1372.879974 | 184.509388 | 4.16412E-06 | 0.005716837 |
| 1372.919974 | 205.780325 | 4.64418E-06 | 0.006376081 |
| 1372.959974 | 207.628463 | 4.68589E-06 | 0.006433533 |
| 1372.999974 | 198.913868 | 4.48921E-06 | 0.006163684 |
| 1373.039974 | 198.09891  | 4.47082E-06 | 0.00613861  |
| 1373.079974 | 195.027594 | 4.4015E-06  | 0.006043613 |
| 1373.119974 | 212.288842 | 4.79106E-06 | 0.006578705 |
| 1373.159974 | 249.307032 | 5.62651E-06 | 0.007726102 |
| 1373.199974 | 276.355982 | 6.23697E-06 | 0.008564606 |
| 1373.239974 | 274.057292 | 6.18509E-06 | 0.008493615 |
| 1373.279974 | 268.480868 | 6.05924E-06 | 0.008321032 |
| 1373.319974 | 279.257298 | 6.30245E-06 | 0.008655278 |
| 1373.359974 | 305.251335 | 6.8891E-06  | 0.009461211 |
| 1373.399974 | 304.704001 | 6.87674E-06 | 0.009444521 |
| 1373.439974 | 263.030048 | 5.93622E-06 | 0.008153044 |
| 1373.479974 | 223.400917 | 5.04185E-06 | 0.006924877 |
| 1373.519974 | 197.037432 | 4.44686E-06 | 0.006107852 |
| 1373.559974 | 185.218124 | 4.18012E-06 | 0.005741639 |
| 1373.599974 | 171.666309 | 3.87427E-06 | 0.005321696 |

|             |            |             |             |
|-------------|------------|-------------|-------------|
| 1373.639974 | 170.273563 | 3.84284E-06 | 0.005278675 |
| 1373.679974 | 158.720243 | 3.58209E-06 | 0.004920652 |
| 1373.719974 | 157.120238 | 3.54598E-06 | 0.00487119  |
| 1373.759974 | 155.915817 | 3.5188E-06  | 0.00483399  |
| 1373.799974 | 166.615122 | 3.76027E-06 | 0.005165861 |
| 1373.839974 | 189.483203 | 4.27637E-06 | 0.005875051 |
| 1373.879974 | 199.266344 | 4.49716E-06 | 0.006178563 |
| 1373.919974 | 182.660789 | 4.1224E-06  | 0.005663847 |
| 1373.959974 | 177.086821 | 3.9966E-06  | 0.005491172 |
| 1373.999974 | 182.274207 | 4.11367E-06 | 0.005652189 |
| 1374.039974 | 178.761652 | 4.0344E-06  | 0.005543429 |
| 1374.079974 | 179.227693 | 4.04492E-06 | 0.005558043 |
| 1374.119974 | 182.352124 | 4.11543E-06 | 0.005655099 |
| 1374.159974 | 191.637462 | 4.32499E-06 | 0.005943229 |
| 1374.199974 | 203.067695 | 4.58296E-06 | 0.006297897 |
| 1374.239974 | 230.119118 | 5.19347E-06 | 0.007137071 |
| 1374.279974 | 268.5021   | 6.05972E-06 | 0.00832775  |
| 1374.319974 | 292.963849 | 6.61179E-06 | 0.00908671  |
| 1374.359974 | 271.028926 | 6.11675E-06 | 0.00840661  |
| 1374.399974 | 244.732024 | 5.52326E-06 | 0.00759117  |
| 1374.439974 | 205.632971 | 4.64085E-06 | 0.006378569 |
| 1374.479974 | 168.432435 | 3.80129E-06 | 0.005224791 |
| 1374.519974 | 157.830031 | 3.562E-06   | 0.004896046 |
| 1374.559974 | 143.741236 | 3.24404E-06 | 0.004459127 |
| 1374.599974 | 131.624582 | 2.97058E-06 | 0.004083364 |
| 1374.639974 | 129.991623 | 2.93373E-06 | 0.004032822 |
| 1374.679974 | 153.822175 | 3.47155E-06 | 0.004772273 |
| 1374.719974 | 174.081203 | 3.92877E-06 | 0.005400959 |
| 1374.759974 | 183.721854 | 4.14635E-06 | 0.005700231 |
| 1374.799974 | 210.345656 | 4.74721E-06 | 0.006526462 |
| 1374.839974 | 225.785751 | 5.09567E-06 | 0.007005731 |
| 1374.879974 | 213.881164 | 4.827E-06   | 0.006636546 |
| 1374.919974 | 177.646781 | 4.00924E-06 | 0.005512385 |
| 1374.959974 | 168.542234 | 3.80376E-06 | 0.005230023 |
| 1374.999974 | 175.376506 | 3.958E-06   | 0.005442255 |
| 1375.039974 | 188.078586 | 4.24467E-06 | 0.005836593 |
| 1375.079974 | 204.378342 | 4.61253E-06 | 0.006342604 |
| 1375.119974 | 216.026799 | 4.87542E-06 | 0.006704293 |
| 1375.159974 | 248.626268 | 5.61115E-06 | 0.007716227 |
| 1375.199974 | 259.294043 | 5.85191E-06 | 0.00804754  |
| 1375.239974 | 274.985017 | 6.20603E-06 | 0.008534779 |
| 1375.279974 | 308.765873 | 6.96842E-06 | 0.009583523 |
| 1375.319974 | 321.807916 | 7.26276E-06 | 0.009988614 |
| 1375.359974 | 313.947119 | 7.08535E-06 | 0.009744906 |
| 1375.399974 | 291.693423 | 6.58311E-06 | 0.009054415 |
| 1375.439974 | 251.641569 | 5.6792E-06  | 0.007811398 |

|             |            |             |             |
|-------------|------------|-------------|-------------|
| 1375.479974 | 203.267997 | 4.58748E-06 | 0.006309981 |
| 1375.519974 | 170.476352 | 3.84741E-06 | 0.005292195 |
| 1375.559974 | 156.227974 | 3.52585E-06 | 0.004850015 |
| 1375.599974 | 156.595459 | 3.53414E-06 | 0.004861565 |
| 1375.639974 | 171.197342 | 3.86369E-06 | 0.00531504  |
| 1375.679974 | 173.73967  | 3.92106E-06 | 0.005394127 |
| 1375.719974 | 163.440821 | 3.68863E-06 | 0.005074524 |
| 1375.759974 | 165.230308 | 3.72902E-06 | 0.005130234 |
| 1375.799974 | 170.298515 | 3.8434E-06  | 0.00528775  |
| 1375.839974 | 173.432057 | 3.91412E-06 | 0.005385203 |
| 1375.879974 | 170.887542 | 3.85669E-06 | 0.005306348 |
| 1375.919974 | 180.065731 | 4.06383E-06 | 0.005591509 |
| 1375.959974 | 178.843872 | 4.03626E-06 | 0.005553728 |
| 1375.999974 | 177.905559 | 4.01508E-06 | 0.005524751 |
| 1376.039974 | 208.879337 | 4.71412E-06 | 0.006486812 |
| 1376.079974 | 225.968031 | 5.09978E-06 | 0.00701771  |
| 1376.119974 | 228.830839 | 5.16439E-06 | 0.007106825 |
| 1376.159974 | 282.651752 | 6.37906E-06 | 0.008778602 |
| 1376.199974 | 298.047577 | 6.72652E-06 | 0.009257035 |
| 1376.239974 | 272.905855 | 6.15911E-06 | 0.008476407 |
| 1376.279974 | 295.039832 | 6.65864E-06 | 0.00916415  |
| 1376.319974 | 307.930538 | 6.94956E-06 | 0.009564823 |
| 1376.359974 | 272.914828 | 6.15931E-06 | 0.008477424 |
| 1376.399974 | 237.928521 | 5.36972E-06 | 0.007390876 |
| 1376.439974 | 201.866924 | 4.55586E-06 | 0.006270861 |
| 1376.479974 | 185.88957  | 4.19527E-06 | 0.005774703 |
| 1376.519974 | 187.179164 | 4.22437E-06 | 0.005814934 |
| 1376.559974 | 194.98329  | 4.4005E-06  | 0.006057554 |
| 1376.599974 | 197.65837  | 4.46087E-06 | 0.006140839 |
| 1376.639974 | 202.028817 | 4.55951E-06 | 0.006276802 |
| 1376.679974 | 200.230485 | 4.51892E-06 | 0.006221111 |
| 1376.719974 | 185.545961 | 4.18751E-06 | 0.005765034 |
| 1376.759974 | 194.647342 | 4.39292E-06 | 0.006047996 |
| 1376.799974 | 200.893804 | 4.53389E-06 | 0.006242264 |
| 1376.839974 | 195.911296 | 4.42145E-06 | 0.006087622 |
| 1376.879974 | 191.897564 | 4.33086E-06 | 0.005963075 |
| 1376.919974 | 170.508255 | 3.84813E-06 | 0.005298572 |
| 1376.959974 | 172.884992 | 3.90177E-06 | 0.005372586 |
| 1376.999974 | 177.427974 | 4.0043E-06  | 0.005513924 |
| 1377.039974 | 186.134757 | 4.2008E-06  | 0.005784673 |
| 1377.079974 | 203.789815 | 4.59925E-06 | 0.006333538 |
| 1377.119974 | 218.445569 | 4.93001E-06 | 0.006789218 |
| 1377.159974 | 228.571885 | 5.15855E-06 | 0.007104147 |
| 1377.199974 | 236.529333 | 5.33814E-06 | 0.007351683 |
| 1377.239974 | 241.780724 | 5.45665E-06 | 0.007515122 |
| 1377.279974 | 258.110507 | 5.82519E-06 | 0.008022924 |

|             |            |             |             |
|-------------|------------|-------------|-------------|
| 1377.319974 | 270.071015 | 6.09513E-06 | 0.00839494  |
| 1377.359974 | 260.293117 | 5.87445E-06 | 0.008091237 |
| 1377.399974 | 225.056519 | 5.07921E-06 | 0.006996107 |
| 1377.439974 | 190.360073 | 4.29616E-06 | 0.005917705 |
| 1377.479974 | 161.944103 | 3.65485E-06 | 0.005034487 |
| 1377.519974 | 160.042727 | 3.61194E-06 | 0.004975521 |
| 1377.559974 | 162.804629 | 3.67427E-06 | 0.005061532 |
| 1377.599974 | 151.064122 | 3.40931E-06 | 0.004696661 |
| 1377.639974 | 142.234561 | 3.21004E-06 | 0.004422274 |
| 1377.679974 | 150.034564 | 3.38607E-06 | 0.004664922 |
| 1377.719974 | 167.113236 | 3.77151E-06 | 0.005196089 |
| 1377.759974 | 197.893293 | 4.46618E-06 | 0.006153319 |
| 1377.799974 | 199.798035 | 4.50916E-06 | 0.006212725 |
| 1377.839974 | 197.12554  | 4.44885E-06 | 0.006129802 |
| 1377.879974 | 201.39514  | 4.54521E-06 | 0.006262751 |
| 1377.919974 | 197.743284 | 4.46279E-06 | 0.006149368 |
| 1377.959974 | 209.168247 | 4.72064E-06 | 0.006504847 |
| 1377.999974 | 195.093337 | 4.40298E-06 | 0.006067313 |
| 1378.039974 | 167.124629 | 3.77177E-06 | 0.00519765  |
| 1378.079974 | 157.72889  | 3.55972E-06 | 0.004905581 |
| 1378.119974 | 177.640914 | 4.00911E-06 | 0.005525032 |
| 1378.159974 | 217.361524 | 4.90555E-06 | 0.006760628 |
| 1378.199974 | 259.921119 | 5.86606E-06 | 0.0080846   |
| 1378.239974 | 286.310416 | 6.46163E-06 | 0.008905673 |
| 1378.279974 | 304.80159  | 6.87895E-06 | 0.009481115 |
| 1378.319974 | 289.8966   | 6.54256E-06 | 0.009017745 |
| 1378.359974 | 245.16117  | 5.53295E-06 | 0.007626391 |
| 1378.399974 | 230.226052 | 5.19588E-06 | 0.007162003 |
| 1378.439974 | 209.739128 | 4.73352E-06 | 0.006524873 |
| 1378.479974 | 187.264107 | 4.22629E-06 | 0.005825856 |
| 1378.519974 | 162.452931 | 3.66634E-06 | 0.005054118 |
| 1378.559974 | 155.958134 | 3.51976E-06 | 0.004852197 |
| 1378.599974 | 149.832783 | 3.38152E-06 | 0.00466176  |
| 1378.639974 | 142.637253 | 3.21912E-06 | 0.004438013 |
| 1378.679974 | 160.718645 | 3.6272E-06  | 0.005000742 |
| 1378.719974 | 174.258749 | 3.93278E-06 | 0.005422199 |
| 1378.759974 | 190.370093 | 4.29639E-06 | 0.005923688 |
| 1378.799974 | 192.301497 | 4.33998E-06 | 0.00598396  |
| 1378.839974 | 173.041984 | 3.90532E-06 | 0.005384807 |
| 1378.879974 | 172.601245 | 3.89537E-06 | 0.005371247 |
| 1378.919974 | 177.206562 | 3.99931E-06 | 0.005514722 |
| 1378.959974 | 188.852115 | 4.26213E-06 | 0.005877306 |
| 1378.999974 | 181.220948 | 4.0899E-06  | 0.005639978 |
| 1379.039974 | 155.877083 | 3.51793E-06 | 0.004851364 |
| 1379.079974 | 169.28013  | 3.82042E-06 | 0.00526866  |
| 1379.119974 | 197.311931 | 4.45306E-06 | 0.006141298 |

|             |            |             |             |
|-------------|------------|-------------|-------------|
| 1379.159974 | 224.102127 | 5.05767E-06 | 0.00697534  |
| 1379.199974 | 264.282836 | 5.9645E-06  | 0.008226232 |
| 1379.239974 | 286.519792 | 6.46635E-06 | 0.008918652 |
| 1379.279974 | 302.327024 | 6.8231E-06  | 0.009410965 |
| 1379.319974 | 304.800794 | 6.87893E-06 | 0.009488245 |
| 1379.359974 | 289.908274 | 6.54283E-06 | 0.009024912 |
| 1379.399974 | 259.230401 | 5.85047E-06 | 0.008070137 |
| 1379.439974 | 230.677903 | 5.20608E-06 | 0.007181473 |
| 1379.479974 | 200.388982 | 4.5225E-06  | 0.006238698 |
| 1379.519974 | 173.630245 | 3.91859E-06 | 0.005405777 |
| 1379.559974 | 168.445125 | 3.80157E-06 | 0.005244496 |
| 1379.599974 | 168.790323 | 3.80936E-06 | 0.005255396 |
| 1379.639974 | 163.260725 | 3.68457E-06 | 0.005083376 |
| 1379.679974 | 161.665413 | 3.64856E-06 | 0.00503385  |
| 1379.719974 | 162.787487 | 3.67389E-06 | 0.005068935 |
| 1379.759974 | 150.268643 | 3.39135E-06 | 0.004679254 |
| 1379.799974 | 151.067068 | 3.40937E-06 | 0.004704253 |
| 1379.839974 | 162.976529 | 3.67815E-06 | 0.005075263 |
| 1379.879974 | 176.893986 | 3.99225E-06 | 0.005508827 |
| 1379.919974 | 170.796866 | 3.85465E-06 | 0.005319105 |
| 1379.959974 | 165.303846 | 3.73068E-06 | 0.005148186 |
| 1379.999974 | 188.908582 | 4.2634E-06  | 0.005883497 |
| 1380.039974 | 207.84301  | 4.69073E-06 | 0.006473391 |
| 1380.079974 | 211.088166 | 4.76397E-06 | 0.006574654 |
| 1380.119974 | 224.252867 | 5.06107E-06 | 0.00698489  |
| 1380.159974 | 239.039491 | 5.39479E-06 | 0.007445671 |
| 1380.199974 | 235.815582 | 5.32203E-06 | 0.007345465 |
| 1380.239974 | 254.059505 | 5.73377E-06 | 0.007913977 |
| 1380.279974 | 278.675874 | 6.28933E-06 | 0.008681031 |
| 1380.319974 | 268.307301 | 6.05532E-06 | 0.008358282 |
| 1380.359974 | 249.630986 | 5.63382E-06 | 0.007776705 |
| 1380.399974 | 254.494028 | 5.74358E-06 | 0.007928432 |
| 1380.439974 | 221.922729 | 5.00849E-06 | 0.006913915 |
| 1380.479974 | 180.841918 | 4.08135E-06 | 0.005634222 |
| 1380.519974 | 174.194649 | 3.93133E-06 | 0.00542728  |
| 1380.559974 | 184.314569 | 4.15972E-06 | 0.005742747 |
| 1380.599974 | 178.614671 | 4.03108E-06 | 0.005565315 |
| 1380.639974 | 173.491964 | 3.91547E-06 | 0.005405857 |
| 1380.679974 | 149.54512  | 3.37503E-06 | 0.00465983  |
| 1380.719974 | 163.04982  | 3.67981E-06 | 0.005080783 |
| 1380.759974 | 199.002706 | 4.49121E-06 | 0.006201288 |
| 1380.799974 | 213.866839 | 4.82668E-06 | 0.006664675 |
| 1380.839974 | 195.351578 | 4.40881E-06 | 0.006087865 |
| 1380.879974 | 183.300528 | 4.13684E-06 | 0.005712476 |
| 1380.919974 | 182.18991  | 4.11177E-06 | 0.005678029 |
| 1380.959974 | 193.561761 | 4.36842E-06 | 0.006032612 |

|             |            |             |             |
|-------------|------------|-------------|-------------|
| 1380.999974 | 201.782482 | 4.55395E-06 | 0.006289004 |
| 1381.039974 | 209.858014 | 4.7362E-06  | 0.006540886 |
| 1381.079974 | 206.235946 | 4.65446E-06 | 0.006428179 |
| 1381.119974 | 196.595991 | 4.4369E-06  | 0.006127888 |
| 1381.159974 | 214.037099 | 4.83052E-06 | 0.00667172  |
| 1381.199974 | 250.766895 | 5.65946E-06 | 0.007816845 |
| 1381.239974 | 275.226823 | 6.21149E-06 | 0.008579553 |
| 1381.279974 | 269.826654 | 6.08961E-06 | 0.008411459 |
| 1381.319974 | 270.122785 | 6.0963E-06  | 0.008420934 |
| 1381.359974 | 263.885596 | 5.95553E-06 | 0.008226731 |
| 1381.399974 | 237.073548 | 5.35042E-06 | 0.00739107  |
| 1381.439974 | 204.857969 | 4.62336E-06 | 0.006386893 |
| 1381.479974 | 176.493097 | 3.9832E-06  | 0.005502716 |
| 1381.519974 | 162.491668 | 3.66721E-06 | 0.005066325 |
| 1381.559974 | 149.907991 | 3.38321E-06 | 0.004674114 |
| 1381.599974 | 145.706945 | 3.2884E-06  | 0.004543257 |
| 1381.639974 | 139.218195 | 3.14196E-06 | 0.004341059 |
| 1381.679974 | 152.185201 | 3.43461E-06 | 0.004745529 |
| 1381.719974 | 180.411368 | 4.07163E-06 | 0.005625857 |
| 1381.759974 | 206.797405 | 4.66713E-06 | 0.006448853 |
| 1381.799974 | 210.598837 | 4.75292E-06 | 0.006567588 |
| 1381.839974 | 191.999429 | 4.33316E-06 | 0.005987733 |
| 1381.879974 | 178.486343 | 4.02819E-06 | 0.005566473 |
| 1381.919974 | 185.033287 | 4.17594E-06 | 0.00577082  |
| 1381.959974 | 183.224646 | 4.13513E-06 | 0.005714577 |
| 1381.999974 | 183.75011  | 4.14698E-06 | 0.005731132 |
| 1382.039974 | 195.596848 | 4.41435E-06 | 0.006100806 |
| 1382.079974 | 195.36303  | 4.40907E-06 | 0.006093689 |
| 1382.119974 | 197.4336   | 4.4558E-06  | 0.006158452 |
| 1382.159974 | 206.825911 | 4.66777E-06 | 0.006451609 |
| 1382.199974 | 229.795491 | 5.18616E-06 | 0.007168316 |
| 1382.239974 | 244.349605 | 5.51463E-06 | 0.007622542 |
| 1382.279974 | 224.05874  | 5.05669E-06 | 0.006989766 |
| 1382.319974 | 203.026127 | 4.58202E-06 | 0.006333813 |
| 1382.359974 | 202.487454 | 4.56986E-06 | 0.006317191 |
| 1382.399974 | 189.374332 | 4.27391E-06 | 0.00590826  |
| 1382.439974 | 175.997315 | 3.97201E-06 | 0.005491071 |
| 1382.479974 | 174.048354 | 3.92803E-06 | 0.005430421 |
| 1382.519974 | 170.28577  | 3.84311E-06 | 0.00531318  |
| 1382.559974 | 171.652474 | 3.87396E-06 | 0.005355978 |
| 1382.599974 | 179.126206 | 4.04263E-06 | 0.005589339 |
| 1382.639974 | 176.348297 | 3.97994E-06 | 0.005502818 |
| 1382.679974 | 178.189356 | 4.02149E-06 | 0.005560428 |
| 1382.719974 | 173.880235 | 3.92423E-06 | 0.005426118 |
| 1382.759974 | 171.830544 | 3.87798E-06 | 0.00536231  |
| 1382.799974 | 174.717932 | 3.94314E-06 | 0.005452574 |

|             |            |             |             |
|-------------|------------|-------------|-------------|
| 1382.839974 | 179.136235 | 4.04286E-06 | 0.005590622 |
| 1382.879974 | 164.923552 | 3.72209E-06 | 0.00514721  |
| 1382.919974 | 152.309296 | 3.43741E-06 | 0.004753661 |
| 1382.959974 | 145.788599 | 3.29025E-06 | 0.004550278 |
| 1382.999974 | 162.073681 | 3.65778E-06 | 0.005058706 |
| 1383.039974 | 177.031237 | 3.99535E-06 | 0.005525727 |
| 1383.079974 | 200.4322   | 4.52348E-06 | 0.006256328 |
| 1383.119974 | 233.986271 | 5.28074E-06 | 0.007303903 |
| 1383.159974 | 248.40891  | 5.60624E-06 | 0.007754331 |
| 1383.199974 | 250.413966 | 5.65149E-06 | 0.007817147 |
| 1383.239974 | 249.615383 | 5.63347E-06 | 0.007792443 |
| 1383.279974 | 257.424551 | 5.80971E-06 | 0.00803646  |
| 1383.319974 | 270.379889 | 6.1021E-06  | 0.008441153 |
| 1383.359974 | 274.232828 | 6.18905E-06 | 0.008561688 |
| 1383.399974 | 238.119845 | 5.37403E-06 | 0.007434437 |
| 1383.439974 | 214.314401 | 4.83678E-06 | 0.006691391 |
| 1383.479974 | 194.064704 | 4.37977E-06 | 0.006059324 |
| 1383.519974 | 174.351045 | 3.93486E-06 | 0.005443958 |
| 1383.559974 | 169.355961 | 3.82213E-06 | 0.005288144 |
| 1383.599974 | 181.778452 | 4.10249E-06 | 0.0056762   |
| 1383.639974 | 193.642735 | 4.37025E-06 | 0.006046848 |
| 1383.679974 | 184.3216   | 4.15988E-06 | 0.005755945 |
| 1383.719974 | 167.257892 | 3.77478E-06 | 0.005223235 |
| 1383.759974 | 166.351405 | 3.75432E-06 | 0.005195077 |
| 1383.799974 | 162.336928 | 3.66372E-06 | 0.005069853 |
| 1383.839974 | 165.31575  | 3.73095E-06 | 0.005163033 |
| 1383.879974 | 169.006276 | 3.81424E-06 | 0.005278445 |
| 1383.919974 | 174.698397 | 3.9427E-06  | 0.005456381 |
| 1383.959974 | 179.235948 | 4.04511E-06 | 0.005598264 |
| 1383.999974 | 172.728413 | 3.89824E-06 | 0.005395164 |
| 1384.039974 | 159.975798 | 3.61043E-06 | 0.004996981 |
| 1384.079974 | 174.543504 | 3.9392E-06  | 0.005452173 |
| 1384.119974 | 196.778879 | 4.44103E-06 | 0.006146912 |
| 1384.159974 | 211.300996 | 4.76877E-06 | 0.006600739 |
| 1384.199974 | 227.705351 | 5.13899E-06 | 0.007113393 |
| 1384.239974 | 250.024192 | 5.6427E-06  | 0.007810848 |
| 1384.279974 | 242.297233 | 5.46831E-06 | 0.007569673 |
| 1384.319974 | 228.25285  | 5.15135E-06 | 0.007131115 |
| 1384.359974 | 240.641665 | 5.43095E-06 | 0.007518386 |
| 1384.399974 | 234.762303 | 5.29826E-06 | 0.007334908 |
| 1384.439974 | 218.015097 | 4.9203E-06  | 0.006811856 |
| 1384.479974 | 216.841406 | 4.89381E-06 | 0.00677538  |
| 1384.519974 | 221.782755 | 5.00533E-06 | 0.006929976 |
| 1384.559974 | 183.7905   | 4.1479E-06  | 0.00574301  |
| 1384.599974 | 138.722852 | 3.13078E-06 | 0.00433488  |
| 1384.639974 | 144.368545 | 3.2582E-06  | 0.00451143  |



|             |            |             |             |
|-------------|------------|-------------|-------------|
| 1384.679974 | 188.339517 | 4.25056E-06 | 0.005885666 |
| 1384.719974 | 202.982494 | 4.58103E-06 | 0.006343447 |
| 1384.759974 | 207.523737 | 4.68352E-06 | 0.006485553 |
| 1384.799974 | 204.976796 | 4.62604E-06 | 0.006406141 |
| 1384.839974 | 179.921194 | 4.06057E-06 | 0.005623241 |
| 1384.879974 | 185.216299 | 4.18007E-06 | 0.005788901 |
| 1384.919974 | 205.119632 | 4.62926E-06 | 0.006411161 |
| 1384.959974 | 200.634837 | 4.52805E-06 | 0.006271166 |
| 1384.999974 | 196.605301 | 4.43711E-06 | 0.006145394 |
| 1385.039974 | 214.95773  | 4.8513E-06  | 0.00671924  |
| 1385.079974 | 235.826826 | 5.32228E-06 | 0.007371788 |
| 1385.119974 | 248.01186  | 5.59728E-06 | 0.007752907 |
| 1385.159974 | 253.280203 | 5.71618E-06 | 0.007917826 |
| 1385.199974 | 264.448217 | 5.96823E-06 | 0.008267189 |
| 1385.239974 | 261.648552 | 5.90504E-06 | 0.008179902 |
| 1385.279974 | 253.550277 | 5.72228E-06 | 0.007926955 |
| 1385.319974 | 268.914431 | 6.06902E-06 | 0.00840754  |
| 1385.359974 | 276.557712 | 6.24152E-06 | 0.008646755 |
| 1385.399974 | 265.314937 | 5.98779E-06 | 0.008295482 |
| 1385.439974 | 255.145896 | 5.75829E-06 | 0.007977762 |
| 1385.479974 | 240.918094 | 5.43719E-06 | 0.007533112 |
| 1385.519974 | 210.187767 | 4.74365E-06 | 0.006572415 |
| 1385.559974 | 172.404106 | 3.89092E-06 | 0.005391104 |
| 1385.599973 | 165.058694 | 3.72514E-06 | 0.005161561 |
| 1385.639973 | 170.884624 | 3.85663E-06 | 0.005343898 |
| 1385.679973 | 181.737892 | 4.10157E-06 | 0.005683465 |
| 1385.719973 | 200.527932 | 4.52564E-06 | 0.006271264 |
| 1385.759973 | 220.583891 | 4.97827E-06 | 0.006898689 |
| 1385.799973 | 220.377101 | 4.9736E-06  | 0.006892421 |
| 1385.839973 | 208.981123 | 4.71641E-06 | 0.006536193 |
| 1385.879973 | 198.38606  | 4.4773E-06  | 0.006204996 |
| 1385.919973 | 195.601731 | 4.41446E-06 | 0.006118086 |
| 1385.959973 | 196.811294 | 4.44176E-06 | 0.006156097 |
| 1385.999973 | 215.717876 | 4.86845E-06 | 0.006747674 |
| 1386.039973 | 245.242544 | 5.53478E-06 | 0.00767143  |
| 1386.079973 | 252.542344 | 5.69953E-06 | 0.007900003 |
| 1386.119973 | 257.630372 | 5.81436E-06 | 0.008059399 |
| 1386.159973 | 262.528257 | 5.9249E-06  | 0.008212855 |
| 1386.199973 | 275.868438 | 6.22597E-06 | 0.008630434 |
| 1386.239973 | 288.528183 | 6.51168E-06 | 0.00902675  |
| 1386.279973 | 283.447236 | 6.39701E-06 | 0.008868046 |
| 1386.319973 | 275.575911 | 6.21936E-06 | 0.008622029 |
| 1386.359973 | 287.586163 | 6.49042E-06 | 0.008998057 |
| 1386.399973 | 291.789646 | 6.58529E-06 | 0.00912984  |
| 1386.439973 | 296.530972 | 6.69229E-06 | 0.00927846  |
| 1386.479973 | 278.86172  | 6.29352E-06 | 0.00872584  |

|             |            |             |             |
|-------------|------------|-------------|-------------|
| 1386.519973 | 225.571501 | 5.09083E-06 | 0.007058544 |
| 1386.559973 | 175.183751 | 3.95365E-06 | 0.005481977 |
| 1386.599973 | 172.392719 | 3.89066E-06 | 0.005394794 |
| 1386.639973 | 186.920879 | 4.21854E-06 | 0.005849602 |
| 1386.679973 | 189.284651 | 4.27189E-06 | 0.005923746 |
| 1386.719973 | 202.278684 | 4.56515E-06 | 0.006330582 |
| 1386.759973 | 221.83566  | 5.00652E-06 | 0.006942844 |
| 1386.799973 | 225.220869 | 5.08292E-06 | 0.007048995 |
| 1386.839973 | 215.995836 | 4.87473E-06 | 0.006760464 |
| 1386.879973 | 215.608138 | 4.86598E-06 | 0.006748524 |
| 1386.919973 | 226.561052 | 5.11317E-06 | 0.007091554 |
| 1386.959973 | 236.117688 | 5.32885E-06 | 0.007390898 |
| 1386.999973 | 221.857229 | 5.00701E-06 | 0.006944721 |
| 1387.039973 | 220.362488 | 4.97327E-06 | 0.00689813  |
| 1387.079973 | 238.859208 | 5.39072E-06 | 0.007477359 |
| 1387.119973 | 263.272729 | 5.9417E-06  | 0.008241849 |
| 1387.159973 | 290.406366 | 6.55407E-06 | 0.00909154  |
| 1387.199973 | 292.547873 | 6.6024E-06  | 0.009158846 |
| 1387.239973 | 300.304702 | 6.77746E-06 | 0.009401962 |
| 1387.279973 | 321.151698 | 7.24795E-06 | 0.010054931 |
| 1387.319973 | 340.434961 | 7.68314E-06 | 0.010658978 |
| 1387.359973 | 345.015955 | 7.78653E-06 | 0.010802719 |
| 1387.399973 | 340.984926 | 7.69555E-06 | 0.010676813 |
| 1387.439973 | 303.995991 | 6.86077E-06 | 0.009518901 |
| 1387.479973 | 270.541903 | 6.10575E-06 | 0.008471611 |
| 1387.519973 | 234.375982 | 5.28954E-06 | 0.007339342 |
| 1387.559973 | 208.960718 | 4.71595E-06 | 0.006543667 |
| 1387.599973 | 199.294449 | 4.4978E-06  | 0.006241145 |
| 1387.639973 | 180.368477 | 4.07067E-06 | 0.005648618 |
| 1387.679973 | 167.849737 | 3.78813E-06 | 0.005256719 |
| 1387.719973 | 197.627598 | 4.46018E-06 | 0.00618948  |
| 1387.759973 | 249.993311 | 5.642E-06   | 0.007829743 |
| 1387.799973 | 271.694218 | 6.13176E-06 | 0.008509656 |
| 1387.839973 | 282.086983 | 6.36631E-06 | 0.00883542  |
| 1387.879973 | 295.57314  | 6.67067E-06 | 0.009258095 |
| 1387.919973 | 286.329005 | 6.46205E-06 | 0.008968804 |
| 1387.959973 | 257.734873 | 5.81672E-06 | 0.00807337  |
| 1387.999973 | 212.007727 | 4.78472E-06 | 0.00664119  |
| 1388.039973 | 176.091452 | 3.97414E-06 | 0.005516264 |
| 1388.079973 | 188.623353 | 4.25697E-06 | 0.00590901  |
| 1388.119973 | 235.700349 | 5.31943E-06 | 0.007384005 |
| 1388.159973 | 263.626645 | 5.94969E-06 | 0.008259116 |
| 1388.199973 | 285.022856 | 6.43257E-06 | 0.008929692 |
| 1388.239973 | 306.731499 | 6.9225E-06  | 0.009610095 |
| 1388.279973 | 329.2126   | 7.42987E-06 | 0.010314739 |
| 1388.319973 | 325.225193 | 7.33988E-06 | 0.010190101 |

|             |            |             |             |
|-------------|------------|-------------|-------------|
| 1388.359973 | 324.587124 | 7.32548E-06 | 0.010170402 |
| 1388.399973 | 309.150065 | 6.97709E-06 | 0.009686987 |
| 1388.439973 | 278.507817 | 6.28553E-06 | 0.008727086 |
| 1388.479973 | 233.440392 | 5.26842E-06 | 0.007315102 |
| 1388.519973 | 193.837733 | 4.37465E-06 | 0.006074286 |
| 1388.559973 | 180.662073 | 4.07729E-06 | 0.005661564 |
| 1388.599973 | 193.882363 | 4.37565E-06 | 0.006076034 |
| 1388.639973 | 190.214712 | 4.29288E-06 | 0.005961266 |
| 1388.679973 | 177.659989 | 4.00954E-06 | 0.005567966 |
| 1388.719973 | 179.731952 | 4.0563E-06  | 0.005633065 |
| 1388.759973 | 210.454812 | 4.74967E-06 | 0.006596154 |
| 1388.799973 | 257.657096 | 5.81496E-06 | 0.008075819 |
| 1388.839973 | 281.439647 | 6.3517E-06  | 0.008821496 |
| 1388.879973 | 284.344186 | 6.41725E-06 | 0.008912793 |
| 1388.919973 | 282.880262 | 6.38421E-06 | 0.008867162 |
| 1388.959973 | 264.808223 | 5.97635E-06 | 0.008300915 |
| 1388.999973 | 245.814876 | 5.5477E-06  | 0.007705754 |
| 1389.039973 | 244.459436 | 5.51711E-06 | 0.007663485 |
| 1389.079973 | 249.255975 | 5.62536E-06 | 0.007814075 |
| 1389.119973 | 252.719259 | 5.70352E-06 | 0.007922876 |
| 1389.159973 | 249.614444 | 5.63345E-06 | 0.007825764 |
| 1389.199973 | 251.518782 | 5.67643E-06 | 0.007885694 |
| 1389.239973 | 264.663078 | 5.97308E-06 | 0.008298037 |
| 1389.279973 | 265.251379 | 5.98635E-06 | 0.008316722 |
| 1389.319973 | 273.178821 | 6.16527E-06 | 0.008565526 |
| 1389.359973 | 261.797761 | 5.90841E-06 | 0.008208909 |
| 1389.399973 | 224.317464 | 5.06253E-06 | 0.007033883 |
| 1389.439973 | 193.681935 | 4.37113E-06 | 0.006073425 |
| 1389.479973 | 179.743392 | 4.05656E-06 | 0.005636506 |
| 1389.519973 | 178.82463  | 4.03582E-06 | 0.005607856 |
| 1389.559973 | 175.939937 | 3.97072E-06 | 0.005517553 |
| 1389.599973 | 169.331915 | 3.82159E-06 | 0.005310475 |
| 1389.639973 | 203.86395  | 4.60093E-06 | 0.00639363  |
| 1389.679973 | 224.606348 | 5.06905E-06 | 0.007044361 |
| 1389.719973 | 192.769503 | 4.35054E-06 | 0.006046031 |
| 1389.759973 | 169.756355 | 3.83116E-06 | 0.005324399 |
| 1389.799973 | 166.937606 | 3.76755E-06 | 0.00523614  |
| 1389.839973 | 188.461552 | 4.25331E-06 | 0.005911427 |
| 1389.879973 | 197.100972 | 4.44829E-06 | 0.006182595 |
| 1389.919973 | 203.230266 | 4.58662E-06 | 0.00637504  |
| 1389.959973 | 231.215252 | 5.21821E-06 | 0.007253098 |
| 1389.999973 | 225.766086 | 5.09523E-06 | 0.007082364 |
| 1390.039973 | 210.649358 | 4.75406E-06 | 0.006608337 |
| 1390.079973 | 219.117954 | 4.94519E-06 | 0.006874205 |
| 1390.119973 | 206.936699 | 4.67027E-06 | 0.00649224  |
| 1390.159973 | 191.773788 | 4.32807E-06 | 0.006016706 |

|             |            |             |             |
|-------------|------------|-------------|-------------|
| 1390.199973 | 197.944392 | 4.46733E-06 | 0.006210481 |
| 1390.239973 | 213.701562 | 4.82295E-06 | 0.006705053 |
| 1390.279973 | 253.997921 | 5.73238E-06 | 0.007969612 |
| 1390.319973 | 276.532858 | 6.24096E-06 | 0.008676933 |
| 1390.359973 | 281.009852 | 6.342E-06   | 0.008817664 |
| 1390.399973 | 262.533606 | 5.92502E-06 | 0.008238145 |
| 1390.439973 | 223.467093 | 5.04334E-06 | 0.007012463 |
| 1390.479973 | 184.34662  | 4.16045E-06 | 0.005785017 |
| 1390.519973 | 174.496446 | 3.93814E-06 | 0.005476065 |
| 1390.559973 | 175.099243 | 3.95175E-06 | 0.00549514  |
| 1390.599973 | 162.208757 | 3.66083E-06 | 0.005090744 |
| 1390.639973 | 148.292804 | 3.34676E-06 | 0.004654141 |
| 1390.679973 | 154.404502 | 3.48469E-06 | 0.004846095 |
| 1390.719973 | 174.718305 | 3.94315E-06 | 0.005483816 |
| 1390.759973 | 209.77902  | 4.73442E-06 | 0.006584442 |
| 1390.799973 | 210.86387  | 4.7589E-06  | 0.006618683 |
| 1390.839973 | 205.836342 | 4.64544E-06 | 0.006461063 |
| 1390.879973 | 209.414781 | 4.7262E-06  | 0.006573577 |
| 1390.919973 | 212.790748 | 4.80239E-06 | 0.006679741 |
| 1390.959973 | 199.35262  | 4.49911E-06 | 0.006258083 |
| 1390.999973 | 173.251622 | 3.91005E-06 | 0.005438876 |
| 1391.039973 | 170.274034 | 3.84285E-06 | 0.005345555 |
| 1391.079973 | 191.874731 | 4.33035E-06 | 0.006023857 |
| 1391.119973 | 215.94766  | 4.87364E-06 | 0.006779815 |
| 1391.159973 | 230.283493 | 5.19718E-06 | 0.007230106 |
| 1391.199973 | 255.353781 | 5.76298E-06 | 0.008017456 |
| 1391.239973 | 277.295555 | 6.25817E-06 | 0.008706622 |
| 1391.279973 | 284.415363 | 6.41886E-06 | 0.008930429 |
| 1391.319973 | 266.218159 | 6.00817E-06 | 0.008359291 |
| 1391.359973 | 251.919826 | 5.68548E-06 | 0.007910549 |
| 1391.399973 | 242.405262 | 5.47075E-06 | 0.007612    |
| 1391.439973 | 232.726055 | 5.2523E-06  | 0.007308264 |
| 1391.479973 | 219.97029  | 4.96442E-06 | 0.006907895 |
| 1391.519973 | 200.001106 | 4.51375E-06 | 0.006280968 |
| 1391.559973 | 181.254217 | 4.09066E-06 | 0.005692392 |
| 1391.599973 | 165.93127  | 3.74484E-06 | 0.005211316 |
| 1391.639973 | 149.469692 | 3.37332E-06 | 0.004694451 |
| 1391.679973 | 154.447624 | 3.48567E-06 | 0.004850934 |
| 1391.719973 | 146.918254 | 3.31574E-06 | 0.004614582 |
| 1391.759973 | 149.634674 | 3.37705E-06 | 0.004700038 |
| 1391.799973 | 169.957178 | 3.8357E-06  | 0.005338523 |
| 1391.839973 | 177.742938 | 4.01141E-06 | 0.005583242 |
| 1391.879973 | 169.419393 | 3.82356E-06 | 0.005321936 |
| 1391.919973 | 165.210876 | 3.72858E-06 | 0.005189884 |
| 1391.959973 | 164.77565  | 3.71876E-06 | 0.005176361 |
| 1391.999973 | 168.179581 | 3.79558E-06 | 0.005283446 |

|             |            |             |             |
|-------------|------------|-------------|-------------|
| 1392.039973 | 170.064084 | 3.83811E-06 | 0.005342802 |
| 1392.079973 | 160.153739 | 3.61445E-06 | 0.005031599 |
| 1392.119973 | 152.383682 | 3.43909E-06 | 0.004787622 |
| 1392.159973 | 175.827941 | 3.96819E-06 | 0.005524358 |
| 1392.199973 | 222.861354 | 5.02967E-06 | 0.007002307 |
| 1392.239973 | 270.491434 | 6.10461E-06 | 0.008499089 |
| 1392.279973 | 282.607134 | 6.37805E-06 | 0.00888003  |
| 1392.319973 | 267.116132 | 6.02844E-06 | 0.008393516 |
| 1392.359973 | 246.960485 | 5.57355E-06 | 0.007760394 |
| 1392.399973 | 234.209172 | 5.28577E-06 | 0.007359913 |
| 1392.439973 | 223.73027  | 5.04928E-06 | 0.00703082  |
| 1392.479973 | 187.478864 | 4.23114E-06 | 0.005891773 |
| 1392.519973 | 165.542327 | 3.73606E-06 | 0.005202538 |
| 1392.559973 | 163.7119   | 3.69475E-06 | 0.00514516  |
| 1392.599973 | 163.001743 | 3.67872E-06 | 0.005122989 |
| 1392.639973 | 180.741181 | 4.07908E-06 | 0.005680685 |
| 1392.679973 | 191.986885 | 4.33288E-06 | 0.00603431  |
| 1392.719973 | 188.917949 | 4.26361E-06 | 0.005938022 |
| 1392.759973 | 171.97045  | 3.88113E-06 | 0.005405487 |
| 1392.799973 | 177.988107 | 4.01694E-06 | 0.005594799 |
| 1392.839973 | 178.217721 | 4.02213E-06 | 0.005602177 |
| 1392.879973 | 182.826902 | 4.12615E-06 | 0.00574723  |
| 1392.919973 | 199.048336 | 4.49224E-06 | 0.006257336 |
| 1392.959973 | 194.400578 | 4.38735E-06 | 0.006111403 |
| 1392.999973 | 176.018675 | 3.9725E-06  | 0.005533687 |
| 1393.039973 | 177.710071 | 4.01067E-06 | 0.005587022 |
| 1393.079973 | 174.391184 | 3.93577E-06 | 0.005482837 |
| 1393.119973 | 180.645849 | 4.07693E-06 | 0.005679646 |
| 1393.159973 | 215.0009   | 4.85227E-06 | 0.00675999  |
| 1393.199973 | 234.844637 | 5.30012E-06 | 0.007384122 |
| 1393.239973 | 254.961965 | 5.75414E-06 | 0.008016893 |
| 1393.279973 | 256.198038 | 5.78203E-06 | 0.008055991 |
| 1393.319973 | 231.750531 | 5.23029E-06 | 0.007287463 |
| 1393.359973 | 213.596727 | 4.82058E-06 | 0.006716804 |
| 1393.399973 | 228.862175 | 5.1651E-06  | 0.007197051 |
| 1393.439973 | 221.124905 | 4.99048E-06 | 0.006953936 |
| 1393.479973 | 183.090104 | 4.13209E-06 | 0.005757983 |
| 1393.519973 | 155.976775 | 3.52018E-06 | 0.004905439 |
| 1393.559973 | 141.489833 | 3.19323E-06 | 0.004449955 |
| 1393.599973 | 137.235863 | 3.09722E-06 | 0.004316289 |
| 1393.639973 | 138.587934 | 3.12774E-06 | 0.004358939 |
| 1393.679973 | 137.648377 | 3.10653E-06 | 0.004329512 |
| 1393.719973 | 152.32825  | 3.43784E-06 | 0.004791381 |
| 1393.759973 | 166.31328  | 3.75346E-06 | 0.005231421 |
| 1393.799973 | 168.642661 | 3.80603E-06 | 0.005304844 |
| 1393.839973 | 174.710212 | 3.94297E-06 | 0.005495864 |

|             |            |             |             |
|-------------|------------|-------------|-------------|
| 1393.879973 | 180.113768 | 4.06492E-06 | 0.005666006 |
| 1393.919973 | 190.933538 | 4.3091E-06  | 0.006006546 |
| 1393.959973 | 198.065576 | 4.47006E-06 | 0.006231091 |
| 1393.999973 | 214.258631 | 4.83552E-06 | 0.006740713 |
| 1394.039973 | 195.68263  | 4.41628E-06 | 0.006156477 |
| 1394.079973 | 162.480697 | 3.66696E-06 | 0.00511204  |
| 1394.119973 | 145.487573 | 3.28345E-06 | 0.004577526 |
| 1394.159973 | 141.195252 | 3.18658E-06 | 0.004442603 |
| 1394.199973 | 163.175796 | 3.68265E-06 | 0.005134351 |
| 1394.239973 | 189.780369 | 4.28308E-06 | 0.005971639 |
| 1394.279973 | 195.944055 | 4.42218E-06 | 0.006165763 |
| 1394.319973 | 213.489354 | 4.81816E-06 | 0.006718053 |
| 1394.359973 | 224.008389 | 5.05556E-06 | 0.007049267 |
| 1394.399973 | 219.777249 | 4.96007E-06 | 0.006916316 |
| 1394.439973 | 202.900594 | 4.57918E-06 | 0.006385397 |
| 1394.479973 | 185.622528 | 4.18924E-06 | 0.005841814 |
| 1394.519973 | 170.682855 | 3.85207E-06 | 0.005371795 |
| 1394.559973 | 160.35997  | 3.6191E-06  | 0.005047054 |
| 1394.599973 | 145.900623 | 3.29277E-06 | 0.004592102 |
| 1394.639973 | 149.594792 | 3.37615E-06 | 0.004708508 |
| 1394.679973 | 175.383551 | 3.95816E-06 | 0.00552037  |
| 1394.719973 | 182.451275 | 4.11767E-06 | 0.005742998 |
| 1394.759973 | 186.553167 | 4.21025E-06 | 0.005872281 |
| 1394.799973 | 202.047334 | 4.55993E-06 | 0.006360186 |
| 1394.839973 | 191.49151  | 4.3217E-06  | 0.006028075 |
| 1394.879973 | 176.237643 | 3.97744E-06 | 0.005548049 |
| 1394.919973 | 180.383297 | 4.071E-06   | 0.005678719 |
| 1394.959973 | 204.917231 | 4.6247E-06  | 0.006451266 |
| 1394.999973 | 230.665257 | 5.20579E-06 | 0.007262082 |
| 1395.039973 | 237.842962 | 5.36778E-06 | 0.007488274 |
| 1395.079973 | 221.236208 | 4.99299E-06 | 0.006965625 |
| 1395.119973 | 221.179595 | 4.99172E-06 | 0.006964042 |
| 1395.159973 | 235.171625 | 5.3075E-06  | 0.007404806 |
| 1395.199973 | 237.912562 | 5.36936E-06 | 0.007491324 |
| 1395.239973 | 235.028756 | 5.30427E-06 | 0.007400732 |
| 1395.279973 | 242.977489 | 5.48366E-06 | 0.007651246 |
| 1395.319973 | 253.657146 | 5.72469E-06 | 0.007987772 |
| 1395.359973 | 246.832511 | 5.57067E-06 | 0.007773084 |
| 1395.399973 | 230.637722 | 5.20517E-06 | 0.007263297 |
| 1395.439973 | 210.868762 | 4.75901E-06 | 0.006640919 |
| 1395.479973 | 188.947224 | 4.26428E-06 | 0.005950711 |
| 1395.519973 | 170.730428 | 3.85315E-06 | 0.005377145 |
| 1395.559973 | 159.924496 | 3.60927E-06 | 0.005036957 |
| 1395.599973 | 155.8673   | 3.51771E-06 | 0.004909313 |
| 1395.639973 | 160.797386 | 3.62897E-06 | 0.00506474  |
| 1395.679973 | 164.932537 | 3.7223E-06  | 0.005195136 |

|             |            |             |             |
|-------------|------------|-------------|-------------|
| 1395.719973 | 173.902018 | 3.92473E-06 | 0.005477819 |
| 1395.759973 | 172.048748 | 3.8829E-06  | 0.005419597 |
| 1395.799973 | 151.721936 | 3.42415E-06 | 0.004779432 |
| 1395.839973 | 144.681355 | 3.26526E-06 | 0.004557776 |
| 1395.879973 | 165.03269  | 3.72456E-06 | 0.005199036 |
| 1395.919973 | 183.280642 | 4.13639E-06 | 0.005774068 |
| 1395.959973 | 187.907172 | 4.2408E-06  | 0.005919991 |
| 1395.999973 | 163.774634 | 3.69617E-06 | 0.005159847 |
| 1396.039973 | 158.442785 | 3.57583E-06 | 0.004992006 |
| 1396.079973 | 185.059758 | 4.17654E-06 | 0.005830785 |
| 1396.119973 | 191.958915 | 4.33225E-06 | 0.006048334 |
| 1396.159973 | 187.635868 | 4.23468E-06 | 0.005912291 |
| 1396.199973 | 218.367867 | 4.92826E-06 | 0.006880835 |
| 1396.239973 | 237.74763  | 5.36563E-06 | 0.007491711 |
| 1396.279973 | 242.048969 | 5.46271E-06 | 0.00762747  |
| 1396.319973 | 245.496792 | 5.54052E-06 | 0.00773634  |
| 1396.359973 | 239.883065 | 5.41383E-06 | 0.007559651 |
| 1396.399973 | 225.647737 | 5.09256E-06 | 0.007111244 |
| 1396.439973 | 223.468461 | 5.04337E-06 | 0.007042766 |
| 1396.479973 | 198.161157 | 4.47222E-06 | 0.006245367 |
| 1396.519973 | 175.469162 | 3.96009E-06 | 0.005530351 |
| 1396.559973 | 158.614215 | 3.5797E-06  | 0.004999268 |
| 1396.599973 | 147.839776 | 3.33654E-06 | 0.004659809 |
| 1396.639973 | 159.455687 | 3.59869E-06 | 0.005026078 |
| 1396.679973 | 184.677012 | 4.1679E-06  | 0.005821227 |
| 1396.719973 | 202.947026 | 4.58023E-06 | 0.006397301 |
| 1396.759973 | 195.381472 | 4.40949E-06 | 0.006158996 |
| 1396.799973 | 186.726335 | 4.21415E-06 | 0.005886329 |
| 1396.839973 | 194.786615 | 4.39606E-06 | 0.006140596 |
| 1396.879973 | 221.713239 | 5.00376E-06 | 0.006989651 |
| 1396.919973 | 215.469918 | 4.86286E-06 | 0.006793021 |
| 1396.959973 | 188.132601 | 4.24589E-06 | 0.005931339 |
| 1396.999973 | 197.647126 | 4.46062E-06 | 0.006231486 |
| 1397.039973 | 215.614277 | 4.86611E-06 | 0.006798156 |
| 1397.079973 | 228.879933 | 5.1655E-06  | 0.007216618 |
| 1397.119973 | 216.768918 | 4.89217E-06 | 0.006834952 |
| 1397.159973 | 216.459146 | 4.88518E-06 | 0.00682538  |
| 1397.199973 | 226.370694 | 5.10887E-06 | 0.007138115 |
| 1397.239973 | 217.455204 | 4.90766E-06 | 0.00685718  |
| 1397.279973 | 230.333501 | 5.19831E-06 | 0.007263489 |
| 1397.319973 | 244.639219 | 5.52117E-06 | 0.007714836 |
| 1397.359973 | 251.821086 | 5.68325E-06 | 0.007941548 |
| 1397.399973 | 234.290554 | 5.28761E-06 | 0.007388908 |
| 1397.439973 | 204.315156 | 4.61111E-06 | 0.006443747 |
| 1397.479973 | 177.959501 | 4.0163E-06  | 0.005612696 |
| 1397.519973 | 163.453469 | 3.68892E-06 | 0.005155335 |

|             |            |             |             |
|-------------|------------|-------------|-------------|
| 1397.559973 | 161.891375 | 3.65366E-06 | 0.005106213 |
| 1397.599973 | 147.638625 | 3.332E-06   | 0.0046568   |
| 1397.639973 | 157.332365 | 3.55077E-06 | 0.004962701 |
| 1397.679973 | 197.578438 | 4.45907E-06 | 0.006232353 |
| 1397.719973 | 213.610862 | 4.8209E-06  | 0.006738268 |
| 1397.759973 | 195.931628 | 4.4219E-06  | 0.00618076  |
| 1397.799973 | 191.963863 | 4.33236E-06 | 0.006055769 |
| 1397.839973 | 205.210974 | 4.63133E-06 | 0.006473852 |
| 1397.879973 | 196.66048  | 4.43835E-06 | 0.006204285 |
| 1397.919973 | 186.141666 | 4.20096E-06 | 0.005872603 |
| 1397.959973 | 187.580103 | 4.23342E-06 | 0.005918154 |
| 1397.999973 | 178.333613 | 4.02474E-06 | 0.005626588 |
| 1398.039973 | 172.169007 | 3.88561E-06 | 0.005432245 |
| 1398.079973 | 152.579462 | 3.44351E-06 | 0.004814297 |
| 1398.119973 | 162.103246 | 3.65844E-06 | 0.005114944 |
| 1398.159973 | 215.063126 | 4.85368E-06 | 0.006786214 |
| 1398.199973 | 253.089455 | 5.71188E-06 | 0.007986346 |
| 1398.239973 | 253.233987 | 5.71514E-06 | 0.007991135 |
| 1398.279973 | 223.698124 | 5.04856E-06 | 0.007059293 |
| 1398.319973 | 222.963499 | 5.03198E-06 | 0.007036312 |
| 1398.359973 | 225.407146 | 5.08713E-06 | 0.007113632 |
| 1398.399973 | 216.07447  | 4.8765E-06  | 0.006819297 |
| 1398.439973 | 192.650153 | 4.34785E-06 | 0.006080201 |
| 1398.479973 | 164.205199 | 3.70588E-06 | 0.005182603 |
| 1398.519973 | 150.859875 | 3.4047E-06  | 0.004761537 |
| 1398.559973 | 145.042812 | 3.27341E-06 | 0.004578066 |
| 1398.599973 | 159.294133 | 3.59505E-06 | 0.005028032 |
| 1398.639973 | 168.111632 | 3.79405E-06 | 0.005306504 |
| 1398.679973 | 162.160819 | 3.65974E-06 | 0.00511881  |
| 1398.719973 | 167.142775 | 3.77218E-06 | 0.005276223 |
| 1398.759973 | 175.403512 | 3.95861E-06 | 0.005537149 |
| 1398.799973 | 195.233046 | 4.40614E-06 | 0.006163306 |
| 1398.839973 | 198.708026 | 4.48456E-06 | 0.006273187 |
| 1398.879973 | 185.027377 | 4.17581E-06 | 0.005841457 |
| 1398.919973 | 165.195101 | 3.72822E-06 | 0.005215486 |
| 1398.959973 | 173.009841 | 3.90459E-06 | 0.005462367 |
| 1398.999973 | 179.432011 | 4.04953E-06 | 0.005665293 |
| 1399.039973 | 189.823852 | 4.28406E-06 | 0.005993571 |
| 1399.079973 | 198.50202  | 4.47991E-06 | 0.006267758 |
| 1399.119973 | 198.575926 | 4.48158E-06 | 0.006270271 |
| 1399.159973 | 242.064275 | 5.46305E-06 | 0.007643686 |
| 1399.199973 | 275.139943 | 6.20953E-06 | 0.008688368 |
| 1399.239973 | 278.593983 | 6.28748E-06 | 0.008797691 |
| 1399.279973 | 291.312617 | 6.57452E-06 | 0.009199594 |
| 1399.319973 | 292.003161 | 6.5901E-06  | 0.009221665 |
| 1399.359973 | 284.516939 | 6.42115E-06 | 0.008985502 |



|             |            |             |             |
|-------------|------------|-------------|-------------|
| 1399.399973 | 263.889689 | 5.95562E-06 | 0.008334298 |
| 1399.439973 | 252.724592 | 5.70364E-06 | 0.007981905 |
| 1399.479973 | 244.97195  | 5.52868E-06 | 0.007737271 |
| 1399.519973 | 198.644305 | 4.48313E-06 | 0.006274223 |
| 1399.559973 | 157.559091 | 3.55589E-06 | 0.00497668  |
| 1399.599973 | 157.235428 | 3.54858E-06 | 0.004966599 |
| 1399.639973 | 159.109043 | 3.59087E-06 | 0.005025924 |
| 1399.679973 | 157.825515 | 3.5619E-06  | 0.004985523 |
| 1399.719973 | 145.861199 | 3.29188E-06 | 0.004607716 |
| 1399.759973 | 138.726883 | 3.13087E-06 | 0.00438247  |
| 1399.799973 | 155.426326 | 3.50776E-06 | 0.004910156 |
| 1399.839973 | 185.750837 | 4.19214E-06 | 0.005868322 |
| 1399.879973 | 206.758126 | 4.66624E-06 | 0.00653218  |
| 1399.919973 | 214.81297  | 4.84803E-06 | 0.006786853 |
| 1399.959973 | 205.480316 | 4.6374E-06  | 0.006492181 |
| 1399.999973 | 203.734876 | 4.59801E-06 | 0.006437217 |
| 1400.039973 | 232.739187 | 5.2526E-06  | 0.007353849 |
| 1400.079973 | 229.106102 | 5.17061E-06 | 0.007239261 |
| 1400.119973 | 202.120259 | 4.56157E-06 | 0.006386749 |
| 1400.159973 | 200.115012 | 4.51632E-06 | 0.006323566 |
| 1400.199973 | 215.695364 | 4.86794E-06 | 0.006816095 |
| 1400.239973 | 238.11334  | 5.37389E-06 | 0.007524731 |
| 1400.279973 | 259.01875  | 5.84569E-06 | 0.008185606 |
| 1400.319973 | 251.634674 | 5.67904E-06 | 0.007952479 |
| 1400.359973 | 240.7157   | 5.43262E-06 | 0.007607621 |
| 1400.399973 | 234.202259 | 5.28562E-06 | 0.00740198  |
| 1400.439973 | 221.53041  | 4.99963E-06 | 0.007001686 |
| 1400.479973 | 197.76251  | 4.46322E-06 | 0.006250656 |
| 1400.519973 | 182.454811 | 4.11775E-06 | 0.005766992 |
| 1400.559973 | 168.856058 | 3.81085E-06 | 0.005337318 |
| 1400.599973 | 157.544939 | 3.55557E-06 | 0.004979931 |
| 1400.639973 | 162.593546 | 3.66951E-06 | 0.005139662 |
| 1400.679973 | 178.583176 | 4.03037E-06 | 0.005645263 |
| 1400.719973 | 223.627988 | 5.04697E-06 | 0.007069395 |
| 1400.759973 | 231.629867 | 5.22756E-06 | 0.007322562 |
| 1400.799973 | 207.677358 | 4.68699E-06 | 0.006565534 |
| 1400.839973 | 190.650968 | 4.30273E-06 | 0.006027432 |
| 1400.879973 | 178.292989 | 4.02382E-06 | 0.005636895 |
| 1400.919973 | 170.493254 | 3.8478E-06  | 0.005390453 |
| 1400.959973 | 181.328137 | 4.09232E-06 | 0.005733181 |
| 1400.999973 | 197.536346 | 4.45812E-06 | 0.006245826 |
| 1401.039973 | 205.921414 | 4.64736E-06 | 0.006511136 |
| 1401.079973 | 208.320924 | 4.70151E-06 | 0.006587196 |
| 1401.119973 | 216.747076 | 4.89168E-06 | 0.00685383  |
| 1401.159973 | 251.810545 | 5.68301E-06 | 0.007962811 |
| 1401.199973 | 258.991395 | 5.84508E-06 | 0.008190119 |

|             |            |             |             |
|-------------|------------|-------------|-------------|
| 1401.239973 | 253.926009 | 5.73076E-06 | 0.008030165 |
| 1401.279973 | 249.261838 | 5.62549E-06 | 0.00788289  |
| 1401.319973 | 245.859145 | 5.5487E-06  | 0.007775502 |
| 1401.359973 | 234.075105 | 5.28275E-06 | 0.007403033 |
| 1401.399973 | 218.786519 | 4.93771E-06 | 0.006919702 |
| 1401.439973 | 203.749128 | 4.59833E-06 | 0.006444289 |
| 1401.479973 | 196.908966 | 4.44396E-06 | 0.006228122 |
| 1401.519973 | 197.725566 | 4.46239E-06 | 0.00625413  |
| 1401.559973 | 182.621861 | 4.12152E-06 | 0.005776559 |
| 1401.599973 | 167.903404 | 3.78935E-06 | 0.005311147 |
| 1401.639973 | 155.878973 | 3.51797E-06 | 0.004930929 |
| 1401.679973 | 148.615838 | 3.35405E-06 | 0.004701308 |
| 1401.719973 | 145.91611  | 3.29312E-06 | 0.004616037 |
| 1401.759973 | 183.362354 | 4.13823E-06 | 0.005800809 |
| 1401.799973 | 216.171163 | 4.87868E-06 | 0.006838936 |
| 1401.839973 | 217.992969 | 4.9198E-06  | 0.006896769 |
| 1401.879973 | 206.603379 | 4.66275E-06 | 0.006536617 |
| 1401.919973 | 194.295986 | 4.38499E-06 | 0.006147405 |
| 1401.959973 | 185.097818 | 4.1774E-06  | 0.005856547 |
| 1401.999973 | 197.777152 | 4.46355E-06 | 0.006257904 |
| 1402.039973 | 194.879327 | 4.39815E-06 | 0.006166389 |
| 1402.079973 | 205.382392 | 4.63519E-06 | 0.006498913 |
| 1402.119973 | 250.245771 | 5.6477E-06  | 0.007918751 |
| 1402.159973 | 295.652157 | 6.67246E-06 | 0.009355853 |
| 1402.199973 | 299.336875 | 6.75562E-06 | 0.009472725 |
| 1402.239973 | 257.519053 | 5.81185E-06 | 0.008149603 |
| 1402.279973 | 233.853387 | 5.27775E-06 | 0.007400876 |
| 1402.319973 | 247.501216 | 5.58576E-06 | 0.00783302  |
| 1402.359973 | 249.640929 | 5.63405E-06 | 0.007900963 |
| 1402.399973 | 224.445066 | 5.06541E-06 | 0.007103734 |
| 1402.439973 | 206.886798 | 4.66915E-06 | 0.006548198 |
| 1402.479973 | 188.668304 | 4.25798E-06 | 0.005971733 |
| 1402.519973 | 172.013816 | 3.88211E-06 | 0.00544474  |
| 1402.559973 | 146.899862 | 3.31533E-06 | 0.004649943 |
| 1402.599973 | 133.852551 | 3.02087E-06 | 0.004237066 |
| 1402.639973 | 144.684279 | 3.26532E-06 | 0.004580072 |
| 1402.679973 | 155.394657 | 3.50704E-06 | 0.004919256 |
| 1402.719973 | 174.506205 | 3.93836E-06 | 0.005524419 |
| 1402.759973 | 193.186448 | 4.35995E-06 | 0.006115962 |
| 1402.799973 | 192.384931 | 4.34186E-06 | 0.006090761 |
| 1402.839973 | 197.593033 | 4.4594E-06  | 0.006255824 |
| 1402.879973 | 189.093247 | 4.26757E-06 | 0.00598689  |
| 1402.919973 | 188.046156 | 4.24394E-06 | 0.005953908 |
| 1402.959973 | 204.812097 | 4.62232E-06 | 0.006484935 |
| 1402.999973 | 197.276875 | 4.45226E-06 | 0.006246527 |
| 1403.039973 | 185.684798 | 4.19065E-06 | 0.005879646 |

|             |            |             |             |
|-------------|------------|-------------|-------------|
| 1403.079973 | 178.596143 | 4.03067E-06 | 0.005655347 |
| 1403.119973 | 175.98186  | 3.97167E-06 | 0.005572723 |
| 1403.159973 | 205.576835 | 4.63958E-06 | 0.006510077 |
| 1403.199973 | 239.358878 | 5.402E-06   | 0.007580081 |
| 1403.239973 | 238.447724 | 5.38143E-06 | 0.007551442 |
| 1403.279973 | 246.82528  | 5.5705E-06  | 0.007816975 |
| 1403.319973 | 247.176364 | 5.57843E-06 | 0.007828317 |
| 1403.359973 | 234.024629 | 5.28161E-06 | 0.007412    |
| 1403.399973 | 222.716674 | 5.02641E-06 | 0.007054057 |
| 1403.439973 | 232.940349 | 5.25714E-06 | 0.007378079 |
| 1403.479973 | 233.679178 | 5.27381E-06 | 0.007401692 |
| 1403.519973 | 213.694324 | 4.82278E-06 | 0.006768873 |
| 1403.559973 | 196.018413 | 4.42386E-06 | 0.006209156 |
| 1403.599973 | 187.338012 | 4.22796E-06 | 0.005934362 |
| 1403.639973 | 184.005613 | 4.15275E-06 | 0.005828966 |
| 1403.679973 | 182.841881 | 4.12649E-06 | 0.005792267 |
| 1403.719973 | 182.948478 | 4.12889E-06 | 0.005795809 |
| 1403.759973 | 181.670206 | 4.10004E-06 | 0.005755477 |
| 1403.799973 | 170.347643 | 3.84451E-06 | 0.005396922 |
| 1403.839973 | 155.44158  | 3.5081E-06  | 0.004924811 |
| 1403.879973 | 163.683105 | 3.6941E-06  | 0.005186073 |
| 1403.919973 | 161.621264 | 3.64757E-06 | 0.005120892 |
| 1403.959973 | 162.543581 | 3.66838E-06 | 0.005150262 |
| 1403.999973 | 183.401156 | 4.13911E-06 | 0.005811308 |
| 1404.039973 | 203.865044 | 4.60095E-06 | 0.006459918 |
| 1404.079973 | 210.288768 | 4.74592E-06 | 0.006663658 |
| 1404.119973 | 216.202964 | 4.8794E-06  | 0.006851263 |
| 1404.159973 | 212.917599 | 4.80525E-06 | 0.006747345 |
| 1404.199973 | 224.768724 | 5.07272E-06 | 0.007123109 |
| 1404.239973 | 254.927083 | 5.75335E-06 | 0.008079083 |
| 1404.279973 | 252.046414 | 5.68834E-06 | 0.007988017 |
| 1404.319973 | 253.250226 | 5.7155E-06  | 0.008026398 |
| 1404.359973 | 254.192999 | 5.73678E-06 | 0.008056507 |
| 1404.399973 | 229.394704 | 5.17712E-06 | 0.007270746 |
| 1404.439973 | 189.208854 | 4.27018E-06 | 0.005997212 |
| 1404.479973 | 157.15322  | 3.54673E-06 | 0.00498131  |
| 1404.519973 | 159.161231 | 3.59205E-06 | 0.005045102 |
| 1404.559973 | 175.109347 | 3.95197E-06 | 0.005550785 |
| 1404.599973 | 181.285853 | 4.09137E-06 | 0.005746737 |
| 1404.639973 | 174.040736 | 3.92786E-06 | 0.005517225 |
| 1404.679973 | 187.737176 | 4.23697E-06 | 0.005951582 |
| 1404.719973 | 204.260442 | 4.60987E-06 | 0.006475582 |
| 1404.759973 | 219.5067   | 4.95396E-06 | 0.006959125 |
| 1404.799973 | 220.71664  | 4.98127E-06 | 0.006997684 |
| 1404.839973 | 211.170163 | 4.76582E-06 | 0.006695209 |
| 1404.879973 | 202.52938  | 4.57081E-06 | 0.006421434 |

|             |            |             |             |
|-------------|------------|-------------|-------------|
| 1404.919973 | 181.615229 | 4.0988E-06  | 0.00575849  |
| 1404.959973 | 173.230212 | 3.90956E-06 | 0.005492782 |
| 1404.999973 | 185.37212  | 4.18359E-06 | 0.005877945 |
| 1405.039973 | 197.588765 | 4.4593E-06  | 0.006265499 |
| 1405.079973 | 197.795383 | 4.46397E-06 | 0.00627223  |
| 1405.119973 | 226.97006  | 5.1224E-06  | 0.007197584 |
| 1405.159973 | 234.910487 | 5.3016E-06  | 0.0074496   |
| 1405.199973 | 221.320021 | 4.99488E-06 | 0.007018812 |
| 1405.239973 | 243.698499 | 5.49994E-06 | 0.007728729 |
| 1405.279973 | 273.823802 | 6.17982E-06 | 0.00868438  |
| 1405.319973 | 266.213448 | 6.00807E-06 | 0.008443256 |
| 1405.359973 | 254.057026 | 5.73371E-06 | 0.008057931 |
| 1405.399973 | 244.504573 | 5.51813E-06 | 0.007755176 |
| 1405.439973 | 207.91056  | 4.69225E-06 | 0.006594678 |
| 1405.479973 | 178.093361 | 4.01932E-06 | 0.005649072 |
| 1405.519973 | 164.225005 | 3.70633E-06 | 0.00520932  |
| 1405.559973 | 162.605454 | 3.66978E-06 | 0.005158094 |
| 1405.599973 | 173.522304 | 3.91616E-06 | 0.00550455  |
| 1405.639973 | 181.552891 | 4.0974E-06  | 0.005759463 |
| 1405.679973 | 177.796212 | 4.01261E-06 | 0.00564045  |
| 1405.719973 | 180.861178 | 4.08178E-06 | 0.005737847 |
| 1405.759973 | 189.133113 | 4.26847E-06 | 0.006000446 |
| 1405.799973 | 181.954533 | 4.10646E-06 | 0.005772862 |
| 1405.839973 | 162.645235 | 3.67068E-06 | 0.005160384 |
| 1405.879973 | 152.405504 | 3.43958E-06 | 0.004835637 |
| 1405.919973 | 147.173287 | 3.3215E-06  | 0.004669758 |
| 1405.959973 | 166.30669  | 3.75331E-06 | 0.005277004 |
| 1405.999973 | 181.807893 | 4.10315E-06 | 0.00576903  |
| 1406.039973 | 197.933643 | 4.46709E-06 | 0.006280902 |
| 1406.079973 | 214.562201 | 4.84237E-06 | 0.00680876  |
| 1406.119973 | 198.258915 | 4.47443E-06 | 0.006291582 |
| 1406.159973 | 181.226835 | 4.09004E-06 | 0.005751247 |
| 1406.199973 | 184.246566 | 4.15819E-06 | 0.005847244 |
| 1406.239973 | 214.990001 | 4.85202E-06 | 0.006823111 |
| 1406.279973 | 239.283972 | 5.40031E-06 | 0.007594342 |
| 1406.319973 | 267.201606 | 6.03037E-06 | 0.008480627 |
| 1406.359973 | 249.432814 | 5.62935E-06 | 0.007916894 |
| 1406.399973 | 214.293035 | 4.8363E-06  | 0.006801766 |
| 1406.439973 | 177.529747 | 4.0066E-06  | 0.005635041 |
| 1406.479973 | 164.656327 | 3.71606E-06 | 0.00522657  |
| 1406.519973 | 162.308752 | 3.66308E-06 | 0.005152199 |
| 1406.559973 | 155.584    | 3.51131E-06 | 0.004938874 |
| 1406.599973 | 148.123322 | 3.34294E-06 | 0.004702175 |
| 1406.639973 | 152.062107 | 3.43183E-06 | 0.004827349 |
| 1406.679973 | 174.758258 | 3.94405E-06 | 0.005548017 |
| 1406.719973 | 196.905132 | 4.44387E-06 | 0.006251287 |

|             |            |             |             |
|-------------|------------|-------------|-------------|
| 1406.759973 | 198.634893 | 4.48291E-06 | 0.006306382 |
| 1406.799973 | 191.526765 | 4.32249E-06 | 0.006080882 |
| 1406.839973 | 207.755701 | 4.68876E-06 | 0.00659633  |
| 1406.879973 | 209.243706 | 4.72234E-06 | 0.006643764 |
| 1406.919973 | 199.189661 | 4.49543E-06 | 0.006324715 |
| 1406.959973 | 188.650231 | 4.25757E-06 | 0.005990235 |
| 1406.999973 | 188.872423 | 4.26259E-06 | 0.005997461 |
| 1407.039973 | 178.031178 | 4.01792E-06 | 0.005653368 |
| 1407.079973 | 174.759935 | 3.94409E-06 | 0.005549648 |
| 1407.119973 | 188.386464 | 4.25162E-06 | 0.00598254  |
| 1407.159973 | 214.894998 | 4.84988E-06 | 0.006824558 |
| 1407.199973 | 232.748982 | 5.25282E-06 | 0.007391769 |
| 1407.239973 | 238.045286 | 5.37235E-06 | 0.007560186 |
| 1407.279973 | 251.353642 | 5.6727E-06  | 0.007983079 |
| 1407.319973 | 245.528984 | 5.54125E-06 | 0.007798308 |
| 1407.359973 | 225.795396 | 5.09589E-06 | 0.007171748 |
| 1407.399973 | 220.212192 | 4.96988E-06 | 0.006994612 |
| 1407.439973 | 215.230463 | 4.85745E-06 | 0.006836572 |
| 1407.479973 | 208.69082  | 4.70986E-06 | 0.006629035 |
| 1407.519973 | 190.412641 | 4.29735E-06 | 0.006048603 |
| 1407.559973 | 163.061123 | 3.68006E-06 | 0.005179909 |
| 1407.599973 | 164.217528 | 3.70616E-06 | 0.005216792 |
| 1407.639973 | 170.328136 | 3.84407E-06 | 0.005411065 |
| 1407.679973 | 156.46621  | 3.53122E-06 | 0.004970834 |
| 1407.719973 | 147.549612 | 3.32999E-06 | 0.004687692 |
| 1407.759973 | 157.536237 | 3.55537E-06 | 0.005005112 |
| 1407.799973 | 184.303357 | 4.15947E-06 | 0.005855702 |
| 1407.839973 | 182.384051 | 4.11615E-06 | 0.005794886 |
| 1407.879973 | 167.668211 | 3.78404E-06 | 0.005327471 |
| 1407.919973 | 168.13548  | 3.79458E-06 | 0.00534247  |
| 1407.959973 | 187.215347 | 4.22519E-06 | 0.005948898 |
| 1407.999973 | 191.021636 | 4.31109E-06 | 0.006070018 |
| 1408.039973 | 194.326931 | 4.38569E-06 | 0.006175224 |
| 1408.079973 | 197.679279 | 4.46135E-06 | 0.006281932 |
| 1408.119973 | 204.665019 | 4.619E-06   | 0.006504112 |
| 1408.159973 | 231.868518 | 5.23295E-06 | 0.00736883  |
| 1408.199973 | 230.395674 | 5.19971E-06 | 0.007322231 |
| 1408.239973 | 246.501839 | 5.5632E-06  | 0.007834325 |
| 1408.279973 | 241.580062 | 5.45213E-06 | 0.007678119 |
| 1408.319973 | 240.054381 | 5.41769E-06 | 0.007629845 |
| 1408.359973 | 240.196308 | 5.4209E-06  | 0.007634573 |
| 1408.399973 | 224.091846 | 5.05744E-06 | 0.0071229   |
| 1408.439973 | 206.997873 | 4.67165E-06 | 0.006579744 |
| 1408.479973 | 184.319374 | 4.15983E-06 | 0.005859039 |
| 1408.519973 | 169.26951  | 3.82018E-06 | 0.005380796 |
| 1408.559973 | 159.187387 | 3.59264E-06 | 0.005060446 |

|             |            |             |             |
|-------------|------------|-------------|-------------|
| 1408.599973 | 168.867916 | 3.81111E-06 | 0.005368335 |
| 1408.639973 | 176.690162 | 3.98765E-06 | 0.005617164 |
| 1408.679973 | 176.417742 | 3.9815E-06  | 0.005608663 |
| 1408.719973 | 199.750383 | 4.50809E-06 | 0.006350633 |
| 1408.759973 | 229.424663 | 5.1778E-06  | 0.00729427  |
| 1408.799973 | 230.599768 | 5.20432E-06 | 0.00733184  |
| 1408.839973 | 212.523    | 4.79635E-06 | 0.006757287 |
| 1408.879973 | 196.944316 | 4.44476E-06 | 0.006262132 |
| 1408.919973 | 211.043371 | 4.76295E-06 | 0.006710622 |
| 1408.959973 | 197.230137 | 4.45121E-06 | 0.006271576 |
| 1408.999973 | 183.841076 | 4.14904E-06 | 0.005845993 |
| 1409.039973 | 197.150104 | 4.4494E-06  | 0.006269387 |
| 1409.079973 | 231.286481 | 5.21981E-06 | 0.007355135 |
| 1409.119973 | 246.915114 | 5.57253E-06 | 0.007852364 |
| 1409.159973 | 247.730155 | 5.59092E-06 | 0.007878507 |
| 1409.199973 | 237.866153 | 5.36831E-06 | 0.007565019 |
| 1409.239973 | 215.270291 | 4.85835E-06 | 0.006846582 |
| 1409.279973 | 201.137391 | 4.53939E-06 | 0.006397272 |
| 1409.319973 | 218.960085 | 4.94162E-06 | 0.00696433  |
| 1409.359973 | 240.841892 | 5.43547E-06 | 0.007660528 |
| 1409.399973 | 239.700713 | 5.40971E-06 | 0.007624447 |
| 1409.439973 | 218.829552 | 4.93868E-06 | 0.00696077  |
| 1409.479973 | 194.034393 | 4.37909E-06 | 0.006172234 |
| 1409.519973 | 178.913516 | 4.03783E-06 | 0.0056914   |
| 1409.559973 | 190.617801 | 4.30198E-06 | 0.006063896 |
| 1409.599973 | 185.522342 | 4.18698E-06 | 0.005901968 |
| 1409.639973 | 182.21553  | 4.11235E-06 | 0.005796934 |
| 1409.679973 | 189.438736 | 4.27537E-06 | 0.006026901 |
| 1409.719973 | 182.23867  | 4.11287E-06 | 0.005797999 |
| 1409.759973 | 162.590657 | 3.66944E-06 | 0.005173036 |
| 1409.799973 | 158.927318 | 3.58677E-06 | 0.005056626 |
| 1409.839973 | 174.884677 | 3.9469E-06  | 0.005564502 |
| 1409.879973 | 210.618069 | 4.75336E-06 | 0.006701662 |
| 1409.919973 | 231.393352 | 5.22223E-06 | 0.00736292  |
| 1409.959973 | 196.05196  | 4.42462E-06 | 0.006238537 |
| 1409.999973 | 169.587916 | 3.82736E-06 | 0.005396582 |
| 1410.039973 | 167.843867 | 3.788E-06   | 0.005341235 |
| 1410.079973 | 167.404924 | 3.7781E-06  | 0.005327417 |
| 1410.119973 | 205.43418  | 4.63636E-06 | 0.006537828 |
| 1410.159973 | 227.568248 | 5.1359E-06  | 0.007242438 |
| 1410.199973 | 213.444221 | 4.81714E-06 | 0.006793129 |
| 1410.239973 | 222.884511 | 5.03019E-06 | 0.007093779 |
| 1410.279973 | 242.072357 | 5.46324E-06 | 0.007704692 |
| 1410.319973 | 237.938366 | 5.36994E-06 | 0.00757333  |
| 1410.359973 | 233.65158  | 5.27319E-06 | 0.007437097 |
| 1410.399973 | 225.594869 | 5.09136E-06 | 0.007180857 |

|             |            |             |             |
|-------------|------------|-------------|-------------|
| 1410.439973 | 187.83047  | 4.23907E-06 | 0.005978957 |
| 1410.479973 | 158.002435 | 3.56589E-06 | 0.005029623 |
| 1410.519973 | 158.107492 | 3.56827E-06 | 0.00503311  |
| 1410.559973 | 167.729246 | 3.78542E-06 | 0.005339556 |
| 1410.599973 | 178.311733 | 4.02425E-06 | 0.005676603 |
| 1410.639973 | 176.444397 | 3.9821E-06  | 0.005617315 |
| 1410.679973 | 184.164426 | 4.15633E-06 | 0.005863258 |
| 1410.719973 | 189.298457 | 4.2722E-06  | 0.006026881 |
| 1410.759973 | 197.735601 | 4.46262E-06 | 0.006295682 |
| 1410.799973 | 222.404525 | 5.01936E-06 | 0.007081313 |
| 1410.839973 | 236.678345 | 5.3415E-06  | 0.007536003 |
| 1410.879973 | 242.157536 | 5.46516E-06 | 0.007710682 |
| 1410.919973 | 234.565938 | 5.29383E-06 | 0.007469166 |
| 1410.959973 | 229.568554 | 5.18104E-06 | 0.007310244 |
| 1410.999973 | 226.483178 | 5.11141E-06 | 0.007212199 |
| 1411.039973 | 225.394547 | 5.08684E-06 | 0.007177736 |
| 1411.079973 | 225.876534 | 5.09772E-06 | 0.007193289 |
| 1411.119973 | 228.968708 | 5.1675E-06  | 0.007291969 |
| 1411.159973 | 236.916781 | 5.34688E-06 | 0.007545306 |
| 1411.199973 | 243.897564 | 5.50443E-06 | 0.007767849 |
| 1411.239973 | 258.138757 | 5.82583E-06 | 0.008221647 |
| 1411.279973 | 266.276412 | 6.00949E-06 | 0.00848107  |
| 1411.319973 | 259.898042 | 5.86554E-06 | 0.008278149 |
| 1411.359973 | 240.710185 | 5.43249E-06 | 0.007667204 |
| 1411.399973 | 219.932774 | 4.96358E-06 | 0.007005592 |
| 1411.439973 | 198.28176  | 4.47494E-06 | 0.006316114 |
| 1411.479973 | 165.258265 | 3.72965E-06 | 0.005264325 |
| 1411.519973 | 137.315195 | 3.09901E-06 | 0.004374318 |
| 1411.559973 | 141.437883 | 3.19206E-06 | 0.004505778 |
| 1411.599973 | 146.373606 | 3.30345E-06 | 0.004663148 |
| 1411.639973 | 156.679201 | 3.53603E-06 | 0.004991603 |
| 1411.679973 | 187.603953 | 4.23396E-06 | 0.005976996 |
| 1411.719973 | 197.100097 | 4.44827E-06 | 0.006279718 |
| 1411.759973 | 187.297603 | 4.22705E-06 | 0.005967574 |
| 1411.799973 | 195.714973 | 4.41701E-06 | 0.006235941 |
| 1411.839973 | 214.46243  | 4.84012E-06 | 0.006833473 |
| 1411.879973 | 210.172243 | 4.74329E-06 | 0.006696963 |
| 1411.919973 | 183.248461 | 4.13566E-06 | 0.005839225 |
| 1411.959973 | 173.378796 | 3.91292E-06 | 0.005524883 |
| 1411.999973 | 184.095508 | 4.15478E-06 | 0.005866548 |
| 1412.039973 | 188.785335 | 4.26062E-06 | 0.006016169 |
| 1412.079973 | 199.95606  | 4.51273E-06 | 0.006372335 |
| 1412.119973 | 215.38847  | 4.86102E-06 | 0.00686434  |
| 1412.159973 | 223.891202 | 5.05291E-06 | 0.007135521 |
| 1412.199973 | 238.76746  | 5.38865E-06 | 0.00760985  |
| 1412.239973 | 256.045897 | 5.7786E-06  | 0.008160769 |

|             |            |             |             |
|-------------|------------|-------------|-------------|
| 1412.279973 | 270.495705 | 6.10471E-06 | 0.008621561 |
| 1412.319973 | 269.769584 | 6.08832E-06 | 0.008598661 |
| 1412.359973 | 240.371969 | 5.42486E-06 | 0.007661856 |
| 1412.399973 | 241.129205 | 5.44195E-06 | 0.00768621  |
| 1412.439973 | 226.456139 | 5.1108E-06  | 0.007218698 |
| 1412.479973 | 203.764396 | 4.59868E-06 | 0.006495541 |
| 1412.519973 | 178.680204 | 4.03256E-06 | 0.005696076 |
| 1412.559973 | 158.886262 | 3.58584E-06 | 0.005065216 |
| 1412.599973 | 155.787184 | 3.5159E-06  | 0.00496656  |
| 1412.639973 | 170.183824 | 3.84081E-06 | 0.005425684 |
| 1412.679973 | 201.767061 | 4.5536E-06  | 0.006432782 |
| 1412.719973 | 220.665492 | 4.98011E-06 | 0.007035505 |
| 1412.759973 | 234.268799 | 5.28712E-06 | 0.007469432 |
| 1412.799973 | 233.979314 | 5.28059E-06 | 0.007460413 |
| 1412.839973 | 203.284431 | 4.58785E-06 | 0.006481893 |
| 1412.879973 | 186.599152 | 4.21128E-06 | 0.005950037 |
| 1412.919973 | 206.434814 | 4.65895E-06 | 0.006582718 |
| 1412.959973 | 228.671446 | 5.1608E-06  | 0.007291998 |
| 1412.999973 | 221.959427 | 5.00932E-06 | 0.007078162 |
| 1413.039973 | 206.369251 | 4.65747E-06 | 0.006581186 |
| 1413.079973 | 197.903713 | 4.46641E-06 | 0.006311396 |
| 1413.119973 | 165.936591 | 3.74496E-06 | 0.005292075 |
| 1413.159973 | 162.849133 | 3.67528E-06 | 0.005193756 |
| 1413.199973 | 196.092965 | 4.42555E-06 | 0.00625418  |
| 1413.239973 | 214.993911 | 4.85211E-06 | 0.0068572   |
| 1413.279973 | 223.301282 | 5.0396E-06  | 0.007122364 |
| 1413.319973 | 241.425346 | 5.44863E-06 | 0.007700663 |
| 1413.359973 | 260.234819 | 5.87314E-06 | 0.008300857 |
| 1413.399973 | 264.571091 | 5.971E-06   | 0.008439413 |
| 1413.439973 | 242.174841 | 5.46555E-06 | 0.007725225 |
| 1413.479973 | 192.498216 | 4.34442E-06 | 0.006140746 |
| 1413.519973 | 165.014536 | 3.72415E-06 | 0.005264158 |
| 1413.559973 | 158.069538 | 3.56741E-06 | 0.005042747 |
| 1413.599973 | 159.186435 | 3.59262E-06 | 0.005078522 |
| 1413.639973 | 169.493025 | 3.82522E-06 | 0.005407486 |
| 1413.679973 | 178.34811  | 4.02507E-06 | 0.005690159 |
| 1413.719973 | 189.726049 | 4.28185E-06 | 0.006053341 |
| 1413.759973 | 190.289473 | 4.29457E-06 | 0.006071489 |
| 1413.799973 | 185.563004 | 4.1879E-06  | 0.005920851 |
| 1413.839973 | 183.038971 | 4.13093E-06 | 0.00584048  |
| 1413.879973 | 185.615036 | 4.18907E-06 | 0.005922846 |
| 1413.919973 | 177.086833 | 3.9966E-06  | 0.005650877 |
| 1413.959973 | 148.826612 | 3.35881E-06 | 0.004749222 |
| 1413.999973 | 135.959003 | 3.06841E-06 | 0.004338725 |
| 1414.039973 | 153.778176 | 3.47056E-06 | 0.004907509 |
| 1414.079973 | 182.116559 | 4.11012E-06 | 0.005812034 |



|             |            |             |             |
|-------------|------------|-------------|-------------|
| 1414.119973 | 210.214868 | 4.74426E-06 | 0.006708948 |
| 1414.159973 | 234.40855  | 5.29027E-06 | 0.007481294 |
| 1414.199973 | 239.62218  | 5.40794E-06 | 0.007647907 |
| 1414.239973 | 230.741558 | 5.20752E-06 | 0.007364677 |
| 1414.279973 | 247.393889 | 5.58334E-06 | 0.0078964   |
| 1414.319973 | 273.164577 | 6.16494E-06 | 0.008719203 |
| 1414.359973 | 252.747863 | 5.70417E-06 | 0.008067746 |
| 1414.399973 | 224.161269 | 5.05901E-06 | 0.00715546  |
| 1414.439973 | 201.40943  | 4.54553E-06 | 0.00642938  |
| 1414.479973 | 197.275745 | 4.45224E-06 | 0.006297603 |
| 1414.519973 | 201.05455  | 4.53752E-06 | 0.006418414 |
| 1414.559973 | 200.424452 | 4.5233E-06  | 0.00639848  |
| 1414.599973 | 189.724319 | 4.28181E-06 | 0.006057053 |
| 1414.639973 | 189.885307 | 4.28545E-06 | 0.006062364 |
| 1414.679973 | 180.702606 | 4.07821E-06 | 0.005769357 |
| 1414.719973 | 179.743931 | 4.05657E-06 | 0.005738911 |
| 1414.759973 | 178.093671 | 4.01933E-06 | 0.005686382 |
| 1414.799973 | 190.526295 | 4.29991E-06 | 0.006083517 |
| 1414.839973 | 194.551545 | 4.39076E-06 | 0.006212219 |
| 1414.879973 | 195.625058 | 4.41499E-06 | 0.006246674 |
| 1414.919973 | 215.88498  | 4.87222E-06 | 0.006893806 |
| 1414.959973 | 224.979951 | 5.07748E-06 | 0.007184437 |
| 1414.999973 | 206.412865 | 4.65845E-06 | 0.006591708 |
| 1415.039973 | 209.790394 | 4.73468E-06 | 0.006699757 |
| 1415.079973 | 224.272443 | 5.06152E-06 | 0.007162451 |
| 1415.119973 | 222.229772 | 5.01542E-06 | 0.007097416 |
| 1415.159973 | 236.543874 | 5.33847E-06 | 0.007554783 |
| 1415.199973 | 268.917268 | 6.06909E-06 | 0.008588973 |
| 1415.239973 | 279.261685 | 6.30255E-06 | 0.008919617 |
| 1415.279973 | 280.66526  | 6.33422E-06 | 0.0089647   |
| 1415.319973 | 280.323956 | 6.32652E-06 | 0.008954052 |
| 1415.359973 | 253.357619 | 5.71793E-06 | 0.008092927 |
| 1415.399973 | 214.122687 | 4.83245E-06 | 0.006839851 |
| 1415.439973 | 189.207124 | 4.27014E-06 | 0.006044129 |
| 1415.479973 | 180.772692 | 4.07979E-06 | 0.005774858 |
| 1415.519973 | 162.65744  | 3.67095E-06 | 0.005196306 |
| 1415.559973 | 159.961087 | 3.6101E-06  | 0.005110312 |
| 1415.599973 | 151.912019 | 3.42844E-06 | 0.004853303 |
| 1415.639973 | 130.38139  | 2.94253E-06 | 0.004165558 |
| 1415.679973 | 137.408077 | 3.10111E-06 | 0.004390178 |
| 1415.719973 | 151.078685 | 3.40964E-06 | 0.004827089 |
| 1415.759973 | 159.633122 | 3.6027E-06  | 0.005100555 |
| 1415.799973 | 173.318242 | 3.91155E-06 | 0.005537974 |
| 1415.839973 | 171.200012 | 3.86375E-06 | 0.005470446 |
| 1415.879973 | 173.268041 | 3.91042E-06 | 0.005536683 |
| 1415.919973 | 182.492887 | 4.11861E-06 | 0.005831623 |

|             |            |             |             |
|-------------|------------|-------------|-------------|
| 1415.959973 | 194.142441 | 4.38152E-06 | 0.006204063 |
| 1415.999973 | 195.361275 | 4.40903E-06 | 0.006243189 |
| 1416.039973 | 183.020651 | 4.13052E-06 | 0.005848983 |
| 1416.079973 | 199.200463 | 4.49568E-06 | 0.006366238 |
| 1416.119973 | 214.794872 | 4.84762E-06 | 0.006864813 |
| 1416.159973 | 218.088463 | 4.92195E-06 | 0.006970273 |
| 1416.199973 | 246.511147 | 5.56341E-06 | 0.007878906 |
| 1416.239973 | 266.842358 | 6.02226E-06 | 0.008528966 |
| 1416.279973 | 272.039104 | 6.13954E-06 | 0.008695313 |
| 1416.319973 | 266.085075 | 6.00517E-06 | 0.008505242 |
| 1416.359973 | 231.800775 | 5.23142E-06 | 0.007409575 |
| 1416.399973 | 205.087557 | 4.62854E-06 | 0.006555865 |
| 1416.439973 | 196.177088 | 4.42744E-06 | 0.006271208 |
| 1416.479973 | 207.777081 | 4.68924E-06 | 0.006642214 |
| 1416.519973 | 200.49035  | 4.52479E-06 | 0.006409452 |
| 1416.559973 | 179.198478 | 4.04426E-06 | 0.005728937 |
| 1416.599973 | 162.033133 | 3.65686E-06 | 0.005180311 |
| 1416.639973 | 153.613624 | 3.46685E-06 | 0.004911272 |
| 1416.679973 | 159.347278 | 3.59625E-06 | 0.00509473  |
| 1416.719973 | 168.490004 | 3.80258E-06 | 0.005387198 |
| 1416.759973 | 174.135604 | 3.93E-06    | 0.005567864 |
| 1416.799973 | 192.987691 | 4.35546E-06 | 0.00617082  |
| 1416.839973 | 216.280834 | 4.88116E-06 | 0.006915819 |
| 1416.879973 | 197.93353  | 4.46708E-06 | 0.006329322 |
| 1416.919973 | 183.007607 | 4.13023E-06 | 0.005852201 |
| 1416.959973 | 187.040995 | 4.22125E-06 | 0.005981349 |
| 1416.999973 | 197.826044 | 4.46466E-06 | 0.006326421 |
| 1417.039973 | 203.152353 | 4.58487E-06 | 0.006496938 |
| 1417.079973 | 204.522828 | 4.6158E-06  | 0.006540951 |
| 1417.119973 | 201.430329 | 4.546E-06   | 0.00644223  |
| 1417.159973 | 201.118264 | 4.53896E-06 | 0.006432431 |
| 1417.199973 | 228.316276 | 5.15278E-06 | 0.00730252  |
| 1417.239973 | 260.559962 | 5.88048E-06 | 0.008334045 |
| 1417.279973 | 276.140554 | 6.23211E-06 | 0.008832641 |
| 1417.319973 | 277.732426 | 6.26803E-06 | 0.00888381  |
| 1417.359973 | 252.992654 | 5.70969E-06 | 0.008092689 |
| 1417.399973 | 222.762361 | 5.02744E-06 | 0.007125888 |
| 1417.439973 | 210.130216 | 4.74235E-06 | 0.006721991 |
| 1417.479973 | 195.709498 | 4.41689E-06 | 0.006260854 |
| 1417.519973 | 180.338666 | 4.06999E-06 | 0.005769296 |
| 1417.559973 | 144.972091 | 3.27182E-06 | 0.004637998 |
| 1417.599973 | 145.735755 | 3.28905E-06 | 0.004662561 |
| 1417.639973 | 166.43736  | 3.75626E-06 | 0.005325023 |
| 1417.679973 | 181.821809 | 4.10346E-06 | 0.0058174   |
| 1417.719973 | 188.621505 | 4.25692E-06 | 0.006035127 |
| 1417.759973 | 171.820652 | 3.87775E-06 | 0.005497723 |

|             |            |             |             |
|-------------|------------|-------------|-------------|
| 1417.799973 | 171.968684 | 3.88109E-06 | 0.005502614 |
| 1417.839973 | 187.26163  | 4.22623E-06 | 0.005992124 |
| 1417.879973 | 183.746778 | 4.14691E-06 | 0.005879819 |
| 1417.919973 | 175.430353 | 3.95922E-06 | 0.005613855 |
| 1417.959973 | 171.604963 | 3.87288E-06 | 0.005491596 |
| 1417.999973 | 195.418779 | 4.41033E-06 | 0.006253847 |
| 1418.039973 | 232.760589 | 5.25308E-06 | 0.007449081 |
| 1418.079973 | 226.393949 | 5.1094E-06  | 0.007245532 |
| 1418.119973 | 190.4114   | 4.29732E-06 | 0.006094115 |
| 1418.159973 | 182.404232 | 4.11661E-06 | 0.005838011 |
| 1418.199973 | 205.436035 | 4.63641E-06 | 0.00657535  |
| 1418.239973 | 261.0078   | 5.89058E-06 | 0.00835426  |
| 1418.279973 | 282.916451 | 6.38503E-06 | 0.009055761 |
| 1418.319973 | 285.295083 | 6.43871E-06 | 0.009132155 |
| 1418.359973 | 281.710188 | 6.35781E-06 | 0.009017658 |
| 1418.399973 | 253.848591 | 5.72901E-06 | 0.008126026 |
| 1418.439973 | 218.24744  | 4.92554E-06 | 0.006986584 |
| 1418.479973 | 193.467909 | 4.3663E-06  | 0.006193511 |
| 1418.519973 | 181.259229 | 4.09077E-06 | 0.005802837 |
| 1418.559973 | 169.345999 | 3.8219E-06  | 0.005421599 |
| 1418.599973 | 157.801877 | 3.56137E-06 | 0.005052157 |
| 1418.639973 | 169.439959 | 3.82402E-06 | 0.005424913 |
| 1418.679973 | 194.578889 | 4.39137E-06 | 0.006229955 |
| 1418.719973 | 207.149091 | 4.67507E-06 | 0.00663261  |
| 1418.759973 | 205.532573 | 4.63858E-06 | 0.006581037 |
| 1418.799973 | 208.274289 | 4.70046E-06 | 0.006669013 |
| 1418.839973 | 189.259772 | 4.27133E-06 | 0.006060333 |
| 1418.879973 | 173.719039 | 3.9206E-06  | 0.005562856 |
| 1418.919973 | 177.050052 | 3.99577E-06 | 0.005669682 |
| 1418.959973 | 183.79862  | 4.14808E-06 | 0.005885958 |
| 1418.999973 | 193.740164 | 4.37245E-06 | 0.0062045   |
| 1419.039973 | 191.14981  | 4.31398E-06 | 0.006121717 |
| 1419.079973 | 203.499112 | 4.59269E-06 | 0.006517397 |
| 1419.119973 | 214.351237 | 4.83761E-06 | 0.006865147 |
| 1419.159973 | 223.033993 | 5.03357E-06 | 0.007143436 |
| 1419.199973 | 207.537625 | 4.68384E-06 | 0.006647299 |
| 1419.239973 | 202.637202 | 4.57324E-06 | 0.006490524 |
| 1419.279973 | 214.961322 | 4.85138E-06 | 0.006885463 |
| 1419.319973 | 229.647417 | 5.18282E-06 | 0.007356083 |
| 1419.359973 | 257.370979 | 5.8085E-06  | 0.008244359 |
| 1419.399973 | 260.670205 | 5.88296E-06 | 0.008350278 |
| 1419.439973 | 212.564671 | 4.79729E-06 | 0.006809463 |
| 1419.479973 | 194.391712 | 4.38715E-06 | 0.006227472 |
| 1419.519973 | 196.646856 | 4.43805E-06 | 0.006299894 |
| 1419.559973 | 187.386629 | 4.22906E-06 | 0.006003397 |
| 1419.599973 | 190.699009 | 4.30381E-06 | 0.00610969  |

|             |            |             |             |
|-------------|------------|-------------|-------------|
| 1419.639973 | 185.878936 | 4.19503E-06 | 0.00595543  |
| 1419.679973 | 170.774895 | 3.85415E-06 | 0.005471662 |
| 1419.719973 | 172.442428 | 3.89179E-06 | 0.005525245 |
| 1419.759973 | 172.381099 | 3.8904E-06  | 0.005523436 |
| 1419.799973 | 176.11875  | 3.97475E-06 | 0.005643357 |
| 1419.839973 | 172.188521 | 3.88606E-06 | 0.005517576 |
| 1419.879973 | 164.930362 | 3.72225E-06 | 0.005285146 |
| 1419.919973 | 170.168012 | 3.84046E-06 | 0.005453139 |
| 1419.959973 | 166.852059 | 3.76562E-06 | 0.005347028 |
| 1419.999973 | 147.136722 | 3.32067E-06 | 0.004715353 |
| 1420.039973 | 134.604447 | 3.03783E-06 | 0.004313847 |
| 1420.079973 | 150.187327 | 3.38952E-06 | 0.004813388 |
| 1420.119973 | 182.234695 | 4.11278E-06 | 0.005840646 |
| 1420.159973 | 202.466199 | 4.56938E-06 | 0.006489251 |
| 1420.199973 | 241.98243  | 5.46121E-06 | 0.007756005 |
| 1420.239973 | 256.217636 | 5.78248E-06 | 0.008212502 |
| 1420.279973 | 231.935753 | 5.23447E-06 | 0.007434408 |
| 1420.319973 | 211.46965  | 4.77258E-06 | 0.006778584 |
| 1420.359973 | 214.4048   | 4.83882E-06 | 0.006872863 |
| 1420.399973 | 209.992484 | 4.73924E-06 | 0.006731613 |
| 1420.439973 | 217.966405 | 4.9192E-06  | 0.006987426 |
| 1420.479973 | 214.483952 | 4.8406E-06  | 0.006875981 |
| 1420.519973 | 204.544858 | 4.61629E-06 | 0.006557536 |
| 1420.559973 | 181.325023 | 4.09225E-06 | 0.005813291 |
| 1420.599973 | 168.813818 | 3.80989E-06 | 0.005412334 |
| 1420.639973 | 172.73992  | 3.8985E-06  | 0.005538364 |
| 1420.679973 | 180.22342  | 4.06739E-06 | 0.005778462 |
| 1420.719973 | 182.415412 | 4.11686E-06 | 0.005848908 |
| 1420.759973 | 173.010064 | 3.9046E-06  | 0.005547494 |
| 1420.799973 | 175.300878 | 3.9563E-06  | 0.005621106 |
| 1420.839973 | 185.9822   | 4.19736E-06 | 0.005963776 |
| 1420.879973 | 190.655343 | 4.30283E-06 | 0.006113799 |
| 1420.919973 | 188.355334 | 4.25092E-06 | 0.006040214 |
| 1420.959973 | 171.699102 | 3.87501E-06 | 0.005506234 |
| 1420.999973 | 196.086962 | 4.42541E-06 | 0.006288507 |
| 1421.039973 | 223.56762  | 5.04561E-06 | 0.007170013 |
| 1421.079973 | 227.601835 | 5.13666E-06 | 0.0072996   |
| 1421.119973 | 224.523895 | 5.06719E-06 | 0.007201087 |
| 1421.159973 | 218.101803 | 4.92225E-06 | 0.00699531  |
| 1421.199973 | 227.287211 | 5.12956E-06 | 0.007290125 |
| 1421.239973 | 235.596943 | 5.31709E-06 | 0.007556868 |
| 1421.279973 | 231.122347 | 5.21611E-06 | 0.007413552 |
| 1421.319973 | 224.750845 | 5.07231E-06 | 0.007209381 |
| 1421.359973 | 219.016949 | 4.94291E-06 | 0.007025651 |
| 1421.399973 | 199.79117  | 4.50901E-06 | 0.006409104 |
| 1421.439973 | 194.898257 | 4.39858E-06 | 0.006252321 |

|             |            |             |             |
|-------------|------------|-------------|-------------|
| 1421.479973 | 211.253462 | 4.7677E-06  | 0.006777185 |
| 1421.519973 | 203.306291 | 4.58834E-06 | 0.006522417 |
| 1421.559973 | 180.467236 | 4.07289E-06 | 0.005789863 |
| 1421.599973 | 178.856846 | 4.03655E-06 | 0.005738359 |
| 1421.639973 | 182.019079 | 4.10792E-06 | 0.005839979 |
| 1421.679973 | 172.24399  | 3.88731E-06 | 0.005526506 |
| 1421.719973 | 160.385679 | 3.61968E-06 | 0.005146173 |
| 1421.759973 | 169.983342 | 3.83629E-06 | 0.00545428  |
| 1421.799973 | 174.499422 | 3.93821E-06 | 0.005599345 |
| 1421.839973 | 188.053622 | 4.24411E-06 | 0.006034443 |
| 1421.879973 | 188.380018 | 4.25147E-06 | 0.006045087 |
| 1421.919973 | 185.927321 | 4.19612E-06 | 0.005966548 |
| 1421.959973 | 193.212924 | 4.36055E-06 | 0.006200523 |
| 1421.999973 | 205.357266 | 4.63463E-06 | 0.00659044  |
| 1422.039973 | 204.15892  | 4.60758E-06 | 0.006552166 |
| 1422.079973 | 203.755893 | 4.59849E-06 | 0.006539416 |
| 1422.119973 | 219.929765 | 4.96351E-06 | 0.007058705 |
| 1422.159973 | 226.357572 | 5.10858E-06 | 0.007265211 |
| 1422.199973 | 211.370735 | 4.77034E-06 | 0.006784382 |
| 1422.239973 | 217.422578 | 4.90692E-06 | 0.006978825 |
| 1422.279973 | 228.882171 | 5.16555E-06 | 0.007346861 |
| 1422.319973 | 223.000803 | 5.03282E-06 | 0.007158277 |
| 1422.359973 | 237.394936 | 5.35767E-06 | 0.00762054  |
| 1422.399973 | 241.511885 | 5.45059E-06 | 0.007752915 |
| 1422.439973 | 213.934814 | 4.82821E-06 | 0.00686784  |
| 1422.479973 | 182.24127  | 4.11293E-06 | 0.005850563 |
| 1422.519973 | 180.174298 | 4.06628E-06 | 0.005784369 |
| 1422.559973 | 167.318985 | 3.77616E-06 | 0.005371809 |
| 1422.599973 | 155.621119 | 3.51215E-06 | 0.004996387 |
| 1422.639973 | 141.626219 | 3.19631E-06 | 0.004547193 |
| 1422.679973 | 152.280335 | 3.43676E-06 | 0.004889403 |
| 1422.719973 | 177.301584 | 4.00145E-06 | 0.005692943 |
| 1422.759973 | 205.652657 | 4.64129E-06 | 0.006603447 |
| 1422.799973 | 221.005305 | 4.98778E-06 | 0.007096616 |
| 1422.839973 | 215.530289 | 4.86422E-06 | 0.006921004 |
| 1422.879973 | 181.114547 | 4.0875E-06  | 0.005816026 |
| 1422.919973 | 158.939133 | 3.58703E-06 | 0.005104064 |
| 1422.959973 | 167.554606 | 3.78147E-06 | 0.005380886 |
| 1422.999973 | 192.704044 | 4.34906E-06 | 0.006188715 |
| 1423.039973 | 215.607079 | 4.86595E-06 | 0.006924443 |
| 1423.079973 | 207.713201 | 4.6878E-06  | 0.006671111 |
| 1423.119973 | 198.17228  | 4.47247E-06 | 0.006364865 |
| 1423.159973 | 204.647785 | 4.61862E-06 | 0.006573029 |
| 1423.199973 | 225.515712 | 5.08958E-06 | 0.007243484 |
| 1423.239973 | 261.990264 | 5.91276E-06 | 0.00841527  |
| 1423.279973 | 287.665738 | 6.49222E-06 | 0.00924024  |

|             |            |             |             |
|-------------|------------|-------------|-------------|
| 1423.319973 | 279.431245 | 6.30637E-06 | 0.008975988 |
| 1423.359973 | 253.257983 | 5.71568E-06 | 0.00813547  |
| 1423.399973 | 232.867064 | 5.25549E-06 | 0.007480658 |
| 1423.439973 | 209.376394 | 4.72533E-06 | 0.006726229 |
| 1423.479973 | 204.774792 | 4.62148E-06 | 0.006578587 |
| 1423.519973 | 187.941876 | 4.24159E-06 | 0.006037983 |
| 1423.559973 | 162.382788 | 3.66475E-06 | 0.005216996 |
| 1423.599973 | 157.700724 | 3.55909E-06 | 0.005066714 |
| 1423.639973 | 162.372853 | 3.66453E-06 | 0.00521697  |
| 1423.679973 | 165.283615 | 3.73022E-06 | 0.005310641 |
| 1423.719973 | 173.737051 | 3.921E-06   | 0.005582411 |
| 1423.759973 | 185.857108 | 4.19454E-06 | 0.005972013 |
| 1423.799973 | 178.743117 | 4.03398E-06 | 0.005743585 |
| 1423.839973 | 190.875815 | 4.3078E-06  | 0.00613362  |
| 1423.879973 | 198.812926 | 4.48693E-06 | 0.006388851 |
| 1423.919973 | 185.046731 | 4.17625E-06 | 0.005946641 |
| 1423.959973 | 168.919078 | 3.81227E-06 | 0.005428517 |
| 1423.999973 | 172.93207  | 3.90284E-06 | 0.005557638 |
| 1424.039973 | 190.168018 | 4.29183E-06 | 0.006111734 |
| 1424.079973 | 219.935021 | 4.96363E-06 | 0.007068602 |
| 1424.119973 | 231.238185 | 5.21872E-06 | 0.007432089 |
| 1424.159973 | 216.554428 | 4.88733E-06 | 0.006960342 |
| 1424.199973 | 205.662894 | 4.64153E-06 | 0.00661046  |
| 1424.239973 | 199.472989 | 4.50183E-06 | 0.006411683 |
| 1424.279973 | 194.997583 | 4.40082E-06 | 0.006268005 |
| 1424.319973 | 193.62438  | 4.36983E-06 | 0.00622404  |
| 1424.359973 | 193.206214 | 4.3604E-06  | 0.006210772 |
| 1424.399973 | 189.670343 | 4.2806E-06  | 0.00609728  |
| 1424.439973 | 191.30756  | 4.31755E-06 | 0.006150084 |
| 1424.479973 | 186.960806 | 4.21944E-06 | 0.006010515 |
| 1424.519973 | 176.8008   | 3.99015E-06 | 0.005684045 |
| 1424.559973 | 162.965647 | 3.67791E-06 | 0.0052394   |
| 1424.599973 | 156.376166 | 3.52919E-06 | 0.005027687 |
| 1424.639973 | 168.729176 | 3.80798E-06 | 0.005425004 |
| 1424.679973 | 185.974211 | 4.19718E-06 | 0.005979637 |
| 1424.719973 | 194.546897 | 4.39065E-06 | 0.00625545  |
| 1424.759973 | 202.410888 | 4.56813E-06 | 0.006508491 |
| 1424.799973 | 205.493896 | 4.63771E-06 | 0.006607811 |
| 1424.839973 | 204.780725 | 4.62162E-06 | 0.006585063 |
| 1424.879973 | 185.510243 | 4.18671E-06 | 0.005965556 |
| 1424.919973 | 175.886804 | 3.96952E-06 | 0.005656249 |
| 1424.959973 | 172.161492 | 3.88545E-06 | 0.005536604 |
| 1424.999973 | 178.94845  | 4.03862E-06 | 0.005755029 |
| 1425.039973 | 201.708341 | 4.55228E-06 | 0.006487176 |
| 1425.079973 | 201.90303  | 4.55667E-06 | 0.006493619 |
| 1425.119973 | 198.208269 | 4.47328E-06 | 0.006374967 |

|             |            |             |             |
|-------------|------------|-------------|-------------|
| 1425.159973 | 203.61961  | 4.59541E-06 | 0.006549196 |
| 1425.199973 | 219.329941 | 4.94997E-06 | 0.007054699 |
| 1425.239973 | 233.858605 | 5.27786E-06 | 0.007522221 |
| 1425.279973 | 235.384689 | 5.3123E-06  | 0.007571521 |
| 1425.319973 | 231.286797 | 5.21982E-06 | 0.007439915 |
| 1425.359973 | 219.303981 | 4.94939E-06 | 0.007054656 |
| 1425.399973 | 202.914695 | 4.5795E-06  | 0.006527622 |
| 1425.439973 | 191.565228 | 4.32336E-06 | 0.006162691 |
| 1425.479973 | 200.473344 | 4.5244E-06  | 0.006449447 |
| 1425.519973 | 219.695706 | 4.95823E-06 | 0.00706805  |
| 1425.559973 | 209.788178 | 4.73463E-06 | 0.006749495 |
| 1425.599973 | 194.30015  | 4.38508E-06 | 0.006251375 |
| 1425.639973 | 174.671885 | 3.9421E-06  | 0.005620017 |
| 1425.679973 | 162.763747 | 3.67335E-06 | 0.005237023 |
| 1425.719973 | 176.548716 | 3.98446E-06 | 0.005680722 |
| 1425.759973 | 184.328308 | 4.16003E-06 | 0.005931209 |
| 1425.799973 | 191.673909 | 4.32581E-06 | 0.006167744 |
| 1425.839973 | 196.711625 | 4.43951E-06 | 0.006330027 |
| 1425.879973 | 185.121725 | 4.17794E-06 | 0.00595724  |
| 1425.919973 | 174.007848 | 3.92711E-06 | 0.005599751 |
| 1425.959973 | 173.911947 | 3.92495E-06 | 0.005596822 |
| 1425.999973 | 181.081659 | 4.08676E-06 | 0.005827721 |
| 1426.039973 | 190.076816 | 4.28977E-06 | 0.006117382 |
| 1426.079973 | 184.591104 | 4.16596E-06 | 0.005940998 |
| 1426.119973 | 173.068287 | 3.90591E-06 | 0.005570297 |
| 1426.159973 | 183.205742 | 4.1347E-06  | 0.005896741 |
| 1426.199973 | 188.174412 | 4.24683E-06 | 0.006056835 |
| 1426.239973 | 208.755233 | 4.71131E-06 | 0.006719466 |
| 1426.279973 | 224.774628 | 5.07285E-06 | 0.007235305 |
| 1426.319973 | 207.884741 | 4.69167E-06 | 0.006691821 |
| 1426.359973 | 194.090947 | 4.38036E-06 | 0.006247973 |
| 1426.399973 | 207.996575 | 4.69419E-06 | 0.006695797 |
| 1426.439973 | 223.324519 | 5.04012E-06 | 0.007189433 |
| 1426.479973 | 224.525218 | 5.06722E-06 | 0.00722829  |
| 1426.519973 | 215.068845 | 4.8538E-06  | 0.006924049 |
| 1426.559973 | 205.490109 | 4.63763E-06 | 0.006615851 |
| 1426.599973 | 191.524106 | 4.32243E-06 | 0.006166382 |
| 1426.639973 | 158.28932  | 3.57237E-06 | 0.005096485 |
| 1426.679973 | 157.441779 | 3.55324E-06 | 0.005069339 |
| 1426.719973 | 158.168471 | 3.56964E-06 | 0.00509288  |
| 1426.759973 | 159.867948 | 3.608E-06   | 0.005147746 |
| 1426.799973 | 170.610043 | 3.85043E-06 | 0.005493795 |
| 1426.839973 | 197.037228 | 4.44686E-06 | 0.006344952 |
| 1426.879973 | 204.080465 | 4.60581E-06 | 0.006571941 |
| 1426.919973 | 210.429833 | 4.74911E-06 | 0.006776597 |
| 1426.959973 | 217.248297 | 4.90299E-06 | 0.006996373 |

|             |            |             |             |
|-------------|------------|-------------|-------------|
| 1426.999973 | 208.121146 | 4.697E-06   | 0.006702625 |
| 1427.039973 | 207.695505 | 4.6874E-06  | 0.006689105 |
| 1427.079973 | 224.752438 | 5.07235E-06 | 0.007238648 |
| 1427.119973 | 229.174235 | 5.17214E-06 | 0.007381269 |
| 1427.159973 | 214.458938 | 4.84004E-06 | 0.006907511 |
| 1427.199973 | 216.172001 | 4.8787E-06  | 0.006962882 |
| 1427.239973 | 221.943681 | 5.00896E-06 | 0.007148988 |
| 1427.279973 | 230.989574 | 5.21311E-06 | 0.007440572 |
| 1427.319973 | 240.571462 | 5.42936E-06 | 0.007749438 |
| 1427.359973 | 232.302808 | 5.24275E-06 | 0.007483293 |
| 1427.399973 | 226.200157 | 5.10502E-06 | 0.007286909 |
| 1427.439973 | 196.990103 | 4.44579E-06 | 0.006346102 |
| 1427.479973 | 178.195724 | 4.02163E-06 | 0.005740795 |
| 1427.519973 | 185.809875 | 4.19347E-06 | 0.005986262 |
| 1427.559973 | 174.276317 | 3.93317E-06 | 0.005614841 |
| 1427.599973 | 172.234266 | 3.88709E-06 | 0.005549206 |
| 1427.639973 | 177.588538 | 4.00793E-06 | 0.005721875 |
| 1427.679973 | 166.64406  | 3.76092E-06 | 0.005369396 |
| 1427.719973 | 163.34715  | 3.68652E-06 | 0.005263315 |
| 1427.759973 | 159.137295 | 3.59151E-06 | 0.00512781  |
| 1427.799973 | 171.541806 | 3.87146E-06 | 0.00552767  |
| 1427.839973 | 190.40149  | 4.2971E-06  | 0.006135566 |
| 1427.879973 | 196.570729 | 4.43633E-06 | 0.006334543 |
| 1427.919973 | 177.172162 | 3.99853E-06 | 0.005709579 |
| 1427.959973 | 164.705308 | 3.71717E-06 | 0.005307969 |
| 1427.999973 | 171.949143 | 3.88065E-06 | 0.005541572 |
| 1428.039973 | 185.792269 | 4.19307E-06 | 0.005987875 |
| 1428.079973 | 192.20461  | 4.33779E-06 | 0.006194711 |
| 1428.119973 | 175.457736 | 3.95984E-06 | 0.005655122 |
| 1428.159973 | 179.444264 | 4.04981E-06 | 0.005783772 |
| 1428.199973 | 191.454213 | 4.32085E-06 | 0.006171045 |
| 1428.239973 | 193.500535 | 4.36704E-06 | 0.006237178 |
| 1428.279973 | 191.984326 | 4.33282E-06 | 0.006188478 |
| 1428.319973 | 183.81102  | 4.14836E-06 | 0.005925184 |
| 1428.359973 | 184.4694   | 4.16322E-06 | 0.005946573 |
| 1428.399973 | 214.651133 | 4.84438E-06 | 0.006919708 |
| 1428.439973 | 229.292941 | 5.17482E-06 | 0.007391923 |
| 1428.479973 | 218.580914 | 4.93307E-06 | 0.007046787 |
| 1428.519973 | 213.361167 | 4.81526E-06 | 0.006878701 |
| 1428.559973 | 169.411477 | 3.82338E-06 | 0.005461929 |
| 1428.599973 | 149.439743 | 3.37265E-06 | 0.004818163 |
| 1428.639973 | 167.990318 | 3.79131E-06 | 0.005416413 |
| 1428.679973 | 191.637889 | 4.325E-06   | 0.006179041 |
| 1428.719973 | 192.296452 | 4.33986E-06 | 0.006200449 |
| 1428.759973 | 181.365964 | 4.09318E-06 | 0.005848168 |
| 1428.799973 | 171.833821 | 3.87805E-06 | 0.005540958 |



|             |            |             |             |
|-------------|------------|-------------|-------------|
| 1428.839973 | 161.07446  | 3.63523E-06 | 0.005194157 |
| 1428.879973 | 171.677975 | 3.87453E-06 | 0.005536242 |
| 1428.919973 | 193.57093  | 4.36863E-06 | 0.006242417 |
| 1428.959973 | 200.582885 | 4.52688E-06 | 0.006468725 |
| 1428.999973 | 212.84205  | 4.80355E-06 | 0.006864271 |
| 1429.039973 | 216.355117 | 4.88283E-06 | 0.006977764 |
| 1429.079973 | 200.224938 | 4.5188E-06  | 0.006457724 |
| 1429.119973 | 195.071739 | 4.4025E-06  | 0.006291697 |
| 1429.159973 | 214.281168 | 4.83603E-06 | 0.006911457 |
| 1429.199973 | 235.549763 | 5.31603E-06 | 0.00759767  |
| 1429.239973 | 246.397442 | 5.56085E-06 | 0.007947785 |
| 1429.279973 | 259.390297 | 5.85408E-06 | 0.008367116 |
| 1429.319973 | 245.564009 | 5.54204E-06 | 0.007921345 |
| 1429.359973 | 233.403781 | 5.2676E-06  | 0.007529294 |
| 1429.399973 | 219.102875 | 4.94485E-06 | 0.007068164 |
| 1429.439973 | 205.603482 | 4.64018E-06 | 0.006632865 |
| 1429.479973 | 192.348379 | 4.34103E-06 | 0.006205423 |
| 1429.519973 | 189.496016 | 4.27666E-06 | 0.006113573 |
| 1429.559973 | 201.262291 | 4.54221E-06 | 0.006493361 |
| 1429.599973 | 191.838407 | 4.32953E-06 | 0.00618949  |
| 1429.639973 | 182.71265  | 4.12357E-06 | 0.005895221 |
| 1429.679973 | 196.148478 | 4.4268E-06  | 0.006328904 |
| 1429.719973 | 186.390983 | 4.20658E-06 | 0.006014238 |
| 1429.759973 | 155.919335 | 3.51888E-06 | 0.005031157 |
| 1429.799973 | 139.841431 | 3.15603E-06 | 0.004512486 |
| 1429.839973 | 160.689436 | 3.62654E-06 | 0.005185367 |
| 1429.879973 | 186.522789 | 4.20956E-06 | 0.006019165 |
| 1429.919973 | 173.655597 | 3.91916E-06 | 0.005604092 |
| 1429.959973 | 154.678061 | 3.49087E-06 | 0.004991802 |
| 1429.999973 | 160.632942 | 3.62526E-06 | 0.005184124 |
| 1430.039973 | 169.944388 | 3.83541E-06 | 0.005484787 |
| 1430.079973 | 189.146009 | 4.26876E-06 | 0.006104671 |
| 1430.119973 | 201.689389 | 4.55185E-06 | 0.00650969  |
| 1430.159973 | 203.928337 | 4.60238E-06 | 0.006582138 |
| 1430.199973 | 209.745852 | 4.73367E-06 | 0.006770097 |
| 1430.239973 | 214.774389 | 4.84716E-06 | 0.0069326   |
| 1430.279973 | 240.1268   | 5.41933E-06 | 0.007751155 |
| 1430.319973 | 248.113485 | 5.59958E-06 | 0.008009185 |
| 1430.359972 | 228.420674 | 5.15514E-06 | 0.007373701 |
| 1430.399972 | 224.360981 | 5.06351E-06 | 0.007242851 |
| 1430.439972 | 198.061542 | 4.46997E-06 | 0.006394028 |
| 1430.479972 | 174.965083 | 3.94872E-06 | 0.005648562 |
| 1430.519972 | 175.804193 | 3.96766E-06 | 0.005675811 |
| 1430.559972 | 178.547222 | 4.02956E-06 | 0.00576453  |
| 1430.599972 | 178.169923 | 4.02105E-06 | 0.00575251  |
| 1430.639972 | 162.346046 | 3.66392E-06 | 0.005241756 |

|             |            |             |             |
|-------------|------------|-------------|-------------|
| 1430.679972 | 169.223615 | 3.81914E-06 | 0.005463969 |
| 1430.719972 | 190.653694 | 4.30279E-06 | 0.006156085 |
| 1430.759972 | 226.816564 | 5.11893E-06 | 0.007323966 |
| 1430.799972 | 234.776057 | 5.29857E-06 | 0.007581192 |
| 1430.839972 | 200.269991 | 4.51981E-06 | 0.006467132 |
| 1430.879972 | 174.373689 | 3.93537E-06 | 0.005631044 |
| 1430.919972 | 174.405088 | 3.93608E-06 | 0.005632215 |
| 1430.959972 | 188.345932 | 4.25071E-06 | 0.006082589 |
| 1430.999972 | 207.650174 | 4.68638E-06 | 0.006706203 |
| 1431.039972 | 225.599979 | 5.09148E-06 | 0.007286108 |
| 1431.079972 | 211.586642 | 4.77522E-06 | 0.006833716 |
| 1431.119972 | 192.867851 | 4.35276E-06 | 0.00622932  |
| 1431.159972 | 205.217281 | 4.63147E-06 | 0.006628372 |
| 1431.199972 | 230.546936 | 5.20312E-06 | 0.00744671  |
| 1431.239972 | 217.451671 | 4.90758E-06 | 0.007023927 |
| 1431.279972 | 212.040132 | 4.78545E-06 | 0.006849319 |
| 1431.319972 | 218.579609 | 4.93304E-06 | 0.007060755 |
| 1431.359972 | 202.616496 | 4.57277E-06 | 0.006545283 |
| 1431.399972 | 191.165992 | 4.31435E-06 | 0.006175561 |
| 1431.439972 | 194.765393 | 4.39558E-06 | 0.006292014 |
| 1431.479972 | 176.396715 | 3.98103E-06 | 0.005698762 |
| 1431.519972 | 165.355843 | 3.73185E-06 | 0.005342219 |
| 1431.559972 | 173.180572 | 3.90844E-06 | 0.005595172 |
| 1431.599972 | 166.982489 | 3.76856E-06 | 0.005395074 |
| 1431.639972 | 149.444112 | 3.37275E-06 | 0.004828557 |
| 1431.679972 | 150.860909 | 3.40472E-06 | 0.00487447  |
| 1431.719972 | 160.749635 | 3.6279E-06  | 0.00519413  |
| 1431.759972 | 172.200014 | 3.88631E-06 | 0.005564269 |
| 1431.799972 | 180.535516 | 4.07444E-06 | 0.005833776 |
| 1431.839972 | 178.644874 | 4.03177E-06 | 0.005772844 |
| 1431.879972 | 172.686785 | 3.8973E-06  | 0.005580466 |
| 1431.919972 | 174.557604 | 3.93952E-06 | 0.00564108  |
| 1431.959972 | 172.725738 | 3.89818E-06 | 0.005582037 |
| 1431.999972 | 165.824395 | 3.74243E-06 | 0.005359153 |
| 1432.039972 | 178.304485 | 4.02408E-06 | 0.005762649 |
| 1432.079972 | 168.23194  | 3.79676E-06 | 0.005437265 |
| 1432.119972 | 170.092466 | 3.83875E-06 | 0.005497551 |
| 1432.159972 | 203.389476 | 4.59022E-06 | 0.006573925 |
| 1432.199972 | 237.328506 | 5.35617E-06 | 0.007671112 |
| 1432.239972 | 246.898055 | 5.57215E-06 | 0.007980649 |
| 1432.279972 | 261.474287 | 5.90111E-06 | 0.008452042 |
| 1432.319972 | 260.847914 | 5.88697E-06 | 0.008432031 |
| 1432.359972 | 251.819108 | 5.68321E-06 | 0.008140398 |
| 1432.399972 | 252.461036 | 5.69769E-06 | 0.008161377 |
| 1432.439972 | 240.971842 | 5.4384E-06  | 0.00779018  |
| 1432.479972 | 216.365375 | 4.88307E-06 | 0.006994893 |

|             |            |             |             |
|-------------|------------|-------------|-------------|
| 1432.519972 | 199.901788 | 4.5115E-06  | 0.006462821 |
| 1432.559972 | 176.653684 | 3.98683E-06 | 0.00571137  |
| 1432.599972 | 172.808801 | 3.90005E-06 | 0.005587217 |
| 1432.639972 | 196.75839  | 4.44056E-06 | 0.006361728 |
| 1432.679972 | 191.498976 | 4.32187E-06 | 0.00619185  |
| 1432.719972 | 164.971249 | 3.72317E-06 | 0.005334262 |
| 1432.759972 | 148.010072 | 3.34038E-06 | 0.004785964 |
| 1432.799972 | 153.379928 | 3.46157E-06 | 0.004959739 |
| 1432.839972 | 180.046734 | 4.0634E-06  | 0.005822208 |
| 1432.879972 | 193.067683 | 4.35727E-06 | 0.006243443 |
| 1432.919972 | 197.194921 | 4.45041E-06 | 0.006377088 |
| 1432.959972 | 187.129271 | 4.22325E-06 | 0.006051744 |
| 1432.999972 | 169.358715 | 3.82219E-06 | 0.005477199 |
| 1433.039972 | 183.451542 | 4.14025E-06 | 0.005933138 |
| 1433.079972 | 207.003196 | 4.67177E-06 | 0.006695025 |
| 1433.119972 | 208.730973 | 4.71077E-06 | 0.006751095 |
| 1433.159972 | 201.94185  | 4.55755E-06 | 0.006531693 |
| 1433.199972 | 213.077739 | 4.80887E-06 | 0.006892069 |
| 1433.239972 | 237.284406 | 5.35518E-06 | 0.007675256 |
| 1433.279972 | 246.093021 | 5.55398E-06 | 0.007960404 |
| 1433.319972 | 259.370265 | 5.85363E-06 | 0.008390118 |
| 1433.359972 | 248.168817 | 5.60082E-06 | 0.008027998 |
| 1433.399972 | 218.784755 | 4.93767E-06 | 0.007077652 |
| 1433.439972 | 212.594538 | 4.79796E-06 | 0.006877591 |
| 1433.479972 | 201.029314 | 4.53695E-06 | 0.006503629 |
| 1433.519972 | 175.221015 | 3.95449E-06 | 0.005668846 |
| 1433.559972 | 157.777069 | 3.56081E-06 | 0.005104633 |
| 1433.599972 | 141.525007 | 3.19402E-06 | 0.00457895  |
| 1433.639972 | 157.590839 | 3.55661E-06 | 0.005098892 |
| 1433.679972 | 166.509626 | 3.75789E-06 | 0.005387612 |
| 1433.719972 | 171.569693 | 3.87209E-06 | 0.005551491 |
| 1433.759972 | 166.183697 | 3.75053E-06 | 0.005377366 |
| 1433.799972 | 161.184063 | 3.6377E-06  | 0.005215734 |
| 1433.839972 | 188.402284 | 4.25198E-06 | 0.006096655 |
| 1433.879972 | 206.929757 | 4.67012E-06 | 0.006696386 |
| 1433.919972 | 204.204235 | 4.60861E-06 | 0.006608371 |
| 1433.959972 | 203.755348 | 4.59847E-06 | 0.006594028 |
| 1433.999972 | 182.296669 | 4.11418E-06 | 0.005899737 |
| 1434.039972 | 168.879227 | 3.81137E-06 | 0.005465655 |
| 1434.079972 | 177.864832 | 4.01416E-06 | 0.005756629 |
| 1434.119972 | 195.31443  | 4.40797E-06 | 0.006321564 |
| 1434.159972 | 202.138585 | 4.56199E-06 | 0.006542618 |
| 1434.199972 | 213.118559 | 4.80979E-06 | 0.006898199 |
| 1434.239972 | 193.342269 | 4.36347E-06 | 0.006258257 |
| 1434.279972 | 175.541508 | 3.96173E-06 | 0.005682226 |
| 1434.319972 | 202.942301 | 4.58013E-06 | 0.006569365 |

|             |            |             |             |
|-------------|------------|-------------|-------------|
| 1434.359972 | 237.580984 | 5.36187E-06 | 0.007690854 |
| 1434.399972 | 243.45645  | 5.49447E-06 | 0.007881272 |
| 1434.439972 | 227.502099 | 5.13441E-06 | 0.007364996 |
| 1434.479972 | 200.886785 | 4.53373E-06 | 0.006503552 |
| 1434.519972 | 154.391976 | 3.48441E-06 | 0.004998458 |
| 1434.559972 | 133.826317 | 3.02027E-06 | 0.004332764 |
| 1434.599972 | 145.631286 | 3.2867E-06  | 0.004715093 |
| 1434.639972 | 179.177714 | 4.04379E-06 | 0.005801385 |
| 1434.679972 | 193.968858 | 4.37761E-06 | 0.006280465 |
| 1434.719972 | 208.414999 | 4.70364E-06 | 0.006748401 |
| 1434.759972 | 210.522461 | 4.7512E-06  | 0.00681683  |
| 1434.799972 | 202.684975 | 4.57432E-06 | 0.006563231 |
| 1434.839972 | 200.103078 | 4.51605E-06 | 0.006479806 |
| 1434.879972 | 216.608935 | 4.88856E-06 | 0.0070145   |
| 1434.919972 | 227.958683 | 5.14471E-06 | 0.007382247 |
| 1434.959972 | 210.719549 | 4.75565E-06 | 0.006824163 |
| 1434.999972 | 185.629785 | 4.18941E-06 | 0.006011797 |
| 1435.039972 | 173.686089 | 3.91985E-06 | 0.005625146 |
| 1435.079972 | 161.857702 | 3.6529E-06  | 0.005242208 |
| 1435.119972 | 179.603491 | 4.0534E-06  | 0.005817116 |
| 1435.159972 | 201.069562 | 4.53786E-06 | 0.006512555 |
| 1435.199972 | 229.19273  | 5.17256E-06 | 0.007423659 |
| 1435.239972 | 237.028184 | 5.3494E-06  | 0.007677667 |
| 1435.279972 | 220.392545 | 4.97395E-06 | 0.007139015 |
| 1435.319972 | 220.059443 | 4.96644E-06 | 0.007128424 |
| 1435.359972 | 231.211979 | 5.21813E-06 | 0.007489898 |
| 1435.399972 | 232.018432 | 5.23633E-06 | 0.007516232 |
| 1435.439972 | 225.962975 | 5.09967E-06 | 0.00732027  |
| 1435.479972 | 213.645865 | 4.82169E-06 | 0.006921439 |
| 1435.519972 | 189.474687 | 4.27618E-06 | 0.006138541 |
| 1435.559972 | 171.295933 | 3.86591E-06 | 0.005549747 |
| 1435.599972 | 170.020881 | 3.83713E-06 | 0.00550859  |
| 1435.639972 | 172.138149 | 3.88492E-06 | 0.005577344 |
| 1435.679972 | 171.360817 | 3.86737E-06 | 0.005552313 |
| 1435.719972 | 192.81747  | 4.35162E-06 | 0.00624771  |
| 1435.759972 | 201.771003 | 4.55369E-06 | 0.006538007 |
| 1435.799972 | 192.016334 | 4.33354E-06 | 0.006222098 |
| 1435.839972 | 198.497267 | 4.47981E-06 | 0.006432286 |
| 1435.879972 | 192.985659 | 4.35542E-06 | 0.006253857 |
| 1435.919972 | 185.42223  | 4.18472E-06 | 0.006008925 |
| 1435.959972 | 176.111269 | 3.97459E-06 | 0.005707346 |
| 1435.999972 | 172.684829 | 3.89726E-06 | 0.00559646  |
| 1436.039972 | 152.950239 | 3.45187E-06 | 0.004957029 |
| 1436.079972 | 153.282881 | 3.45938E-06 | 0.004967948 |
| 1436.119972 | 183.708605 | 4.14605E-06 | 0.005954221 |
| 1436.159972 | 213.95172  | 4.82859E-06 | 0.006934631 |

|             |            |             |             |
|-------------|------------|-------------|-------------|
| 1436.199972 | 224.695902 | 5.07107E-06 | 0.007283076 |
| 1436.239972 | 218.571358 | 4.93285E-06 | 0.007084758 |
| 1436.279972 | 225.800566 | 5.096E-06   | 0.007319289 |
| 1436.319972 | 228.294269 | 5.15228E-06 | 0.007400328 |
| 1436.359972 | 249.439319 | 5.6295E-06  | 0.008085986 |
| 1436.399972 | 235.567083 | 5.31642E-06 | 0.007636507 |
| 1436.439972 | 204.445005 | 4.61404E-06 | 0.00662779  |
| 1436.479972 | 197.623313 | 4.46008E-06 | 0.00640682  |
| 1436.519972 | 191.166345 | 4.31436E-06 | 0.006197662 |
| 1436.559972 | 166.398902 | 3.75539E-06 | 0.005394845 |
| 1436.599972 | 162.730123 | 3.67259E-06 | 0.005276046 |
| 1436.639972 | 185.793083 | 4.19309E-06 | 0.006023962 |
| 1436.679972 | 187.211434 | 4.2251E-06  | 0.006070118 |
| 1436.719972 | 161.71496  | 3.64968E-06 | 0.00524357  |
| 1436.759972 | 147.122591 | 3.32035E-06 | 0.004770549 |
| 1436.799972 | 183.136419 | 4.13313E-06 | 0.005938487 |
| 1436.839972 | 212.668814 | 4.79964E-06 | 0.006896313 |
| 1436.879972 | 206.954258 | 4.67067E-06 | 0.006711191 |
| 1436.919972 | 193.935376 | 4.37685E-06 | 0.006289185 |
| 1436.959972 | 194.227079 | 4.38343E-06 | 0.00629882  |
| 1436.999972 | 199.325123 | 4.49849E-06 | 0.006464331 |
| 1437.039972 | 177.415868 | 4.00403E-06 | 0.00575395  |
| 1437.079972 | 170.844314 | 3.85572E-06 | 0.005540975 |
| 1437.119972 | 199.117413 | 4.4938E-06  | 0.006458134 |
| 1437.159972 | 247.136819 | 5.57753E-06 | 0.008015808 |
| 1437.199972 | 273.683349 | 6.17665E-06 | 0.008877084 |
| 1437.239972 | 256.464548 | 5.78805E-06 | 0.008318813 |
| 1437.279972 | 261.688577 | 5.90595E-06 | 0.008488499 |
| 1437.319972 | 256.81633  | 5.79599E-06 | 0.008330688 |
| 1437.359972 | 227.526717 | 5.13496E-06 | 0.007380788 |
| 1437.399972 | 199.870007 | 4.51079E-06 | 0.006483806 |
| 1437.439972 | 198.157148 | 4.47213E-06 | 0.00642842  |
| 1437.479972 | 192.954459 | 4.35471E-06 | 0.006259813 |
| 1437.519972 | 171.038878 | 3.86011E-06 | 0.005548984 |
| 1437.559972 | 153.548994 | 3.46539E-06 | 0.004981702 |
| 1437.599972 | 146.079049 | 3.2968E-06  | 0.004739481 |
| 1437.639972 | 131.888613 | 2.97654E-06 | 0.004279196 |
| 1437.679972 | 149.139676 | 3.36587E-06 | 0.004839051 |
| 1437.719972 | 171.367464 | 3.86752E-06 | 0.005560418 |
| 1437.759972 | 180.335141 | 4.06991E-06 | 0.005851558 |
| 1437.799972 | 184.068967 | 4.15418E-06 | 0.00597288  |
| 1437.839972 | 169.560257 | 3.82674E-06 | 0.005502238 |
| 1437.879972 | 160.107086 | 3.61339E-06 | 0.005195627 |
| 1437.919972 | 147.49062  | 3.32866E-06 | 0.004786344 |
| 1437.959972 | 149.306601 | 3.36964E-06 | 0.00484541  |
| 1437.999972 | 163.402192 | 3.68776E-06 | 0.005302999 |

|             |            |             |             |
|-------------|------------|-------------|-------------|
| 1438.039972 | 163.544463 | 3.69097E-06 | 0.005307763 |
| 1438.079972 | 170.36613  | 3.84493E-06 | 0.005529311 |
| 1438.119972 | 184.351666 | 4.16056E-06 | 0.005983385 |
| 1438.159972 | 180.439932 | 4.07228E-06 | 0.005856587 |
| 1438.199972 | 184.910997 | 4.17318E-06 | 0.006001873 |
| 1438.239972 | 207.78951  | 4.68952E-06 | 0.006744655 |
| 1438.279972 | 221.870456 | 5.00731E-06 | 0.00720191  |
| 1438.319972 | 214.923096 | 4.85051E-06 | 0.006976592 |
| 1438.359972 | 195.392241 | 4.40973E-06 | 0.00634278  |
| 1438.399972 | 172.81941  | 3.90029E-06 | 0.005610182 |
| 1438.439972 | 169.40354  | 3.8232E-06  | 0.005499446 |
| 1438.479972 | 181.229545 | 4.0901E-06  | 0.005883525 |
| 1438.519972 | 167.481778 | 3.77983E-06 | 0.005437362 |
| 1438.559972 | 159.778842 | 3.60599E-06 | 0.005187427 |
| 1438.599972 | 179.289559 | 4.04632E-06 | 0.00582103  |
| 1438.639972 | 198.279394 | 4.47489E-06 | 0.006437755 |
| 1438.679972 | 198.753176 | 4.48558E-06 | 0.006453317 |
| 1438.719972 | 203.172451 | 4.58532E-06 | 0.00659699  |
| 1438.759972 | 188.430301 | 4.25261E-06 | 0.006118484 |
| 1438.799972 | 186.33442  | 4.20531E-06 | 0.006050597 |
| 1438.839972 | 202.690702 | 4.57445E-06 | 0.006581897 |
| 1438.879972 | 196.365296 | 4.43169E-06 | 0.006376672 |
| 1438.919972 | 179.017212 | 4.04017E-06 | 0.00581348  |
| 1438.959972 | 171.532426 | 3.87125E-06 | 0.005570571 |
| 1438.999972 | 163.719625 | 3.69492E-06 | 0.005316995 |
| 1439.039972 | 165.497157 | 3.73504E-06 | 0.005374872 |
| 1439.079972 | 178.151829 | 4.02064E-06 | 0.005786021 |
| 1439.119972 | 190.986839 | 4.31031E-06 | 0.006203049 |
| 1439.159972 | 196.546477 | 4.43578E-06 | 0.006383797 |
| 1439.199972 | 200.263603 | 4.51967E-06 | 0.00650471  |
| 1439.239972 | 217.403621 | 4.9065E-06  | 0.007061626 |
| 1439.279972 | 243.05416  | 5.48539E-06 | 0.007895017 |
| 1439.319972 | 249.874027 | 5.63931E-06 | 0.00811677  |
| 1439.359972 | 234.71288  | 5.29714E-06 | 0.007624495 |
| 1439.399972 | 228.267337 | 5.15168E-06 | 0.007415322 |
| 1439.439972 | 232.93801  | 5.25709E-06 | 0.00756726  |
| 1439.479972 | 224.048329 | 5.05646E-06 | 0.007278671 |
| 1439.519972 | 209.935841 | 4.73796E-06 | 0.006820387 |
| 1439.559972 | 186.636528 | 4.21213E-06 | 0.006063609 |
| 1439.599972 | 156.683806 | 3.53614E-06 | 0.00509062  |
| 1439.639972 | 131.390426 | 2.9653E-06  | 0.004268963 |
| 1439.679972 | 135.465485 | 3.05727E-06 | 0.004401487 |
| 1439.719972 | 160.849481 | 3.63015E-06 | 0.005226398 |
| 1439.759972 | 198.08972  | 4.47061E-06 | 0.006436604 |
| 1439.799972 | 216.056596 | 4.8761E-06  | 0.007020604 |
| 1439.839972 | 191.239612 | 4.31601E-06 | 0.006214366 |

|             |            |             |             |
|-------------|------------|-------------|-------------|
| 1439.879972 | 173.197055 | 3.90882E-06 | 0.005628226 |
| 1439.919972 | 149.062751 | 3.36414E-06 | 0.00484409  |
| 1439.959972 | 143.828461 | 3.24601E-06 | 0.004674122 |
| 1439.999972 | 160.601197 | 3.62455E-06 | 0.005219345 |
| 1440.039972 | 183.652694 | 4.14479E-06 | 0.005968657 |
| 1440.079972 | 188.449303 | 4.25304E-06 | 0.006124715 |
| 1440.119972 | 187.952374 | 4.24182E-06 | 0.006108734 |
| 1440.159972 | 194.847706 | 4.39744E-06 | 0.006333019 |
| 1440.199972 | 190.769854 | 4.30541E-06 | 0.006200651 |
| 1440.239972 | 202.553765 | 4.57136E-06 | 0.00658385  |
| 1440.279972 | 210.060373 | 4.74077E-06 | 0.006828036 |
| 1440.319972 | 226.771234 | 5.11791E-06 | 0.007371429 |
| 1440.359972 | 228.428861 | 5.15532E-06 | 0.007425518 |
| 1440.399972 | 212.565207 | 4.7973E-06  | 0.006910032 |
| 1440.439972 | 206.002688 | 4.64919E-06 | 0.006696884 |
| 1440.479972 | 205.177144 | 4.63056E-06 | 0.006670232 |
| 1440.519972 | 189.461428 | 4.27588E-06 | 0.006159491 |
| 1440.559972 | 179.270976 | 4.0459E-06  | 0.005828356 |
| 1440.599972 | 164.347212 | 3.70909E-06 | 0.005343312 |
| 1440.639972 | 157.361503 | 3.55143E-06 | 0.005116332 |
| 1440.679972 | 152.682058 | 3.44582E-06 | 0.004964326 |
| 1440.719972 | 148.354939 | 3.34816E-06 | 0.004823767 |
| 1440.759972 | 151.086652 | 3.40982E-06 | 0.004912725 |
| 1440.799972 | 142.426934 | 3.21438E-06 | 0.004631275 |
| 1440.839972 | 142.678809 | 3.22006E-06 | 0.004639594 |
| 1440.879972 | 158.119776 | 3.56854E-06 | 0.005141842 |
| 1440.919972 | 184.979763 | 4.17474E-06 | 0.00601546  |
| 1440.959972 | 202.017698 | 4.55926E-06 | 0.006569708 |
| 1440.999972 | 194.666908 | 4.39336E-06 | 0.006330833 |
| 1441.039972 | 172.752036 | 3.89877E-06 | 0.005618287 |
| 1441.079972 | 166.992905 | 3.7688E-06  | 0.005431138 |
| 1441.119972 | 172.249644 | 3.88743E-06 | 0.00560226  |
| 1441.159972 | 194.482235 | 4.38919E-06 | 0.006325529 |
| 1441.199972 | 222.271069 | 5.01635E-06 | 0.007229561 |
| 1441.239972 | 239.01623  | 5.39426E-06 | 0.007774428 |
| 1441.279972 | 249.089714 | 5.62161E-06 | 0.008102311 |
| 1441.319972 | 267.452757 | 6.03604E-06 | 0.00869986  |
| 1441.359972 | 261.742388 | 5.90716E-06 | 0.008514346 |
| 1441.399972 | 218.740509 | 4.93667E-06 | 0.007115714 |
| 1441.439972 | 184.269997 | 4.15872E-06 | 0.005994541 |
| 1441.479972 | 172.466471 | 3.89233E-06 | 0.005610713 |
| 1441.519972 | 172.696855 | 3.89753E-06 | 0.005618364 |
| 1441.559972 | 161.581767 | 3.64668E-06 | 0.005256901 |
| 1441.599972 | 153.428747 | 3.46267E-06 | 0.004991789 |
| 1441.639972 | 158.522012 | 3.57762E-06 | 0.005157641 |
| 1441.679972 | 177.63287  | 4.00893E-06 | 0.005779589 |

|             |            |             |             |
|-------------|------------|-------------|-------------|
| 1441.719972 | 186.383242 | 4.20641E-06 | 0.006064466 |
| 1441.759972 | 186.840422 | 4.21673E-06 | 0.00607951  |
| 1441.799972 | 191.817828 | 4.32906E-06 | 0.00624164  |
| 1441.839972 | 183.979768 | 4.15217E-06 | 0.00598676  |
| 1441.879972 | 190.415595 | 4.29741E-06 | 0.006196356 |
| 1441.919972 | 194.762412 | 4.39552E-06 | 0.006337983 |
| 1441.959972 | 202.933361 | 4.57992E-06 | 0.006604066 |
| 1441.999972 | 211.041135 | 4.7629E-06  | 0.006868108 |
| 1442.039972 | 202.569939 | 4.57172E-06 | 0.006592605 |
| 1442.079972 | 173.750575 | 3.92131E-06 | 0.00565484  |
| 1442.119972 | 174.029529 | 3.9276E-06  | 0.005664076 |
| 1442.159972 | 192.596434 | 4.34663E-06 | 0.00626854  |
| 1442.199972 | 210.416129 | 4.7488E-06  | 0.006848718 |
| 1442.239972 | 242.852228 | 5.48084E-06 | 0.007904682 |
| 1442.279972 | 257.075676 | 5.80184E-06 | 0.008367878 |
| 1442.319972 | 249.624764 | 5.63368E-06 | 0.008125574 |
| 1442.359972 | 213.438726 | 4.81701E-06 | 0.006947869 |
| 1442.399972 | 182.425708 | 4.11709E-06 | 0.005938496 |
| 1442.439972 | 171.323359 | 3.86653E-06 | 0.005577237 |
| 1442.479972 | 153.111727 | 3.45552E-06 | 0.004984516 |
| 1442.519972 | 142.500866 | 3.21605E-06 | 0.004639211 |
| 1442.559972 | 149.61228  | 3.37654E-06 | 0.004870863 |
| 1442.599972 | 160.908296 | 3.63148E-06 | 0.005238767 |
| 1442.639972 | 177.745774 | 4.01147E-06 | 0.005787114 |
| 1442.679972 | 208.806368 | 4.71247E-06 | 0.006798584 |
| 1442.719972 | 207.496563 | 4.68291E-06 | 0.006756125 |
| 1442.759972 | 190.895224 | 4.30824E-06 | 0.006215755 |
| 1442.799972 | 183.033701 | 4.13082E-06 | 0.005959941 |
| 1442.839972 | 193.930187 | 4.37673E-06 | 0.006314927 |
| 1442.879972 | 203.180176 | 4.58549E-06 | 0.006616317 |
| 1442.919972 | 179.390511 | 4.04859E-06 | 0.005841797 |
| 1442.959972 | 175.246249 | 3.95506E-06 | 0.005706999 |
| 1442.999972 | 193.808379 | 4.37399E-06 | 0.00631166  |
| 1443.039972 | 211.532038 | 4.77398E-06 | 0.006889049 |
| 1443.079972 | 191.118102 | 4.31327E-06 | 0.006224393 |
| 1443.119972 | 182.726461 | 4.12388E-06 | 0.005951256 |
| 1443.159972 | 191.040697 | 4.31152E-06 | 0.006222217 |
| 1443.199972 | 215.955268 | 4.87381E-06 | 0.007033882 |
| 1443.239972 | 252.267409 | 5.69332E-06 | 0.008216833 |
| 1443.279972 | 274.780459 | 6.20141E-06 | 0.008950374 |
| 1443.319972 | 265.829241 | 5.9994E-06  | 0.008659048 |
| 1443.359972 | 232.161794 | 5.23957E-06 | 0.007562583 |
| 1443.399972 | 209.409669 | 4.72608E-06 | 0.00682163  |
| 1443.439972 | 186.474738 | 4.20848E-06 | 0.006074681 |
| 1443.479972 | 191.432915 | 4.32037E-06 | 0.006236374 |
| 1443.519972 | 188.335919 | 4.25048E-06 | 0.006135652 |



|             |            |             |             |
|-------------|------------|-------------|-------------|
| 1443.559972 | 181.015241 | 4.08526E-06 | 0.00589732  |
| 1443.599972 | 181.751273 | 4.10187E-06 | 0.005921464 |
| 1443.639972 | 181.376158 | 4.09341E-06 | 0.005909406 |
| 1443.679972 | 160.647195 | 3.62558E-06 | 0.005234182 |
| 1443.719972 | 140.34926  | 3.16749E-06 | 0.004572965 |
| 1443.759972 | 157.558111 | 3.55587E-06 | 0.005133819 |
| 1443.799972 | 182.579701 | 4.12057E-06 | 0.005949278 |
| 1443.839972 | 189.663104 | 4.28043E-06 | 0.006180259 |
| 1443.879972 | 188.912494 | 4.26349E-06 | 0.006155971 |
| 1443.919972 | 180.971812 | 4.08428E-06 | 0.005897376 |
| 1443.959972 | 194.847307 | 4.39743E-06 | 0.006349716 |
| 1443.999972 | 203.866567 | 4.60098E-06 | 0.006643821 |
| 1444.039972 | 185.453712 | 4.18543E-06 | 0.006043931 |
| 1444.079972 | 172.013084 | 3.8821E-06  | 0.005606057 |
| 1444.119972 | 167.933465 | 3.79002E-06 | 0.00547325  |
| 1444.159972 | 195.600067 | 4.41442E-06 | 0.00637513  |
| 1444.199972 | 206.640685 | 4.66359E-06 | 0.00673516  |
| 1444.239972 | 203.332808 | 4.58894E-06 | 0.006627528 |
| 1444.279972 | 215.394337 | 4.86115E-06 | 0.007020862 |
| 1444.319972 | 217.264355 | 4.90335E-06 | 0.007082012 |
| 1444.359972 | 201.75058  | 4.55323E-06 | 0.006576503 |
| 1444.399972 | 210.107065 | 4.74182E-06 | 0.00684909  |
| 1444.439972 | 215.667007 | 4.8673E-06  | 0.007030528 |
| 1444.479972 | 190.796946 | 4.30602E-06 | 0.006219962 |
| 1444.519972 | 170.058674 | 3.83799E-06 | 0.005544049 |
| 1444.559972 | 187.00983  | 4.22055E-06 | 0.00609684  |
| 1444.599972 | 193.472835 | 4.36641E-06 | 0.006307719 |
| 1444.639972 | 177.094777 | 3.99678E-06 | 0.005773912 |
| 1444.679972 | 162.174767 | 3.66006E-06 | 0.005287613 |
| 1444.719972 | 172.565893 | 3.89457E-06 | 0.005626566 |
| 1444.759972 | 182.020778 | 4.10796E-06 | 0.00593501  |
| 1444.799972 | 193.224123 | 4.3608E-06  | 0.006300483 |
| 1444.839972 | 192.709532 | 4.34919E-06 | 0.006283877 |
| 1444.879972 | 195.406603 | 4.41005E-06 | 0.006372    |
| 1444.919972 | 205.258571 | 4.6324E-06  | 0.006693447 |
| 1444.959972 | 219.128938 | 4.94543E-06 | 0.007145955 |
| 1444.999972 | 250.957033 | 5.66375E-06 | 0.00818412  |
| 1445.039972 | 218.719591 | 4.9362E-06  | 0.007133001 |
| 1445.079972 | 185.855869 | 4.19451E-06 | 0.0060614   |
| 1445.119972 | 185.248393 | 4.1808E-06  | 0.006041755 |
| 1445.159972 | 197.56948  | 4.45887E-06 | 0.006443778 |
| 1445.199972 | 225.305769 | 5.08484E-06 | 0.007348607 |
| 1445.239972 | 253.724582 | 5.72621E-06 | 0.008275748 |
| 1445.279972 | 263.135284 | 5.9386E-06  | 0.008582935 |
| 1445.319972 | 257.460364 | 5.81052E-06 | 0.008398063 |
| 1445.359972 | 227.197775 | 5.12754E-06 | 0.007411137 |

|             |            |             |             |
|-------------|------------|-------------|-------------|
| 1445.399972 | 224.34337  | 5.06312E-06 | 0.00731823  |
| 1445.439972 | 219.15963  | 4.94613E-06 | 0.007149331 |
| 1445.479972 | 190.338915 | 4.29568E-06 | 0.006209325 |
| 1445.519972 | 160.225912 | 3.61608E-06 | 0.00522711  |
| 1445.559972 | 146.01409  | 3.29533E-06 | 0.004763604 |
| 1445.599972 | 153.63183  | 3.46726E-06 | 0.005012266 |
| 1445.639972 | 169.15809  | 3.81766E-06 | 0.005518965 |
| 1445.679972 | 161.725586 | 3.64992E-06 | 0.005276618 |
| 1445.719972 | 147.0927   | 3.31968E-06 | 0.004799324 |
| 1445.759972 | 147.146644 | 3.32089E-06 | 0.004801217 |
| 1445.799972 | 167.947228 | 3.79034E-06 | 0.005480066 |
| 1445.839972 | 155.323618 | 3.50544E-06 | 0.005068302 |
| 1445.879972 | 139.983403 | 3.15923E-06 | 0.004567868 |
| 1445.919972 | 154.906234 | 3.49602E-06 | 0.005054962 |
| 1445.959972 | 181.80737  | 4.10314E-06 | 0.005932975 |
| 1445.999972 | 179.550347 | 4.0522E-06  | 0.005859483 |
| 1446.039972 | 165.639616 | 3.73826E-06 | 0.005405667 |
| 1446.079972 | 170.960385 | 3.85834E-06 | 0.005579465 |
| 1446.119972 | 187.703624 | 4.23621E-06 | 0.006126067 |
| 1446.159972 | 198.981234 | 4.49073E-06 | 0.006494313 |
| 1446.199972 | 198.506581 | 4.48002E-06 | 0.006479001 |
| 1446.239972 | 198.943646 | 4.48988E-06 | 0.006493445 |
| 1446.279972 | 211.828037 | 4.78066E-06 | 0.006914178 |
| 1446.319972 | 235.49603  | 5.31482E-06 | 0.007686927 |
| 1446.359972 | 241.673931 | 5.45424E-06 | 0.0078888   |
| 1446.399972 | 227.21579  | 5.12794E-06 | 0.007417058 |
| 1446.439972 | 196.104416 | 4.4258E-06  | 0.006401659 |
| 1446.479972 | 171.08572  | 3.86117E-06 | 0.0055851   |
| 1446.519972 | 170.680917 | 3.85203E-06 | 0.005572039 |
| 1446.559972 | 164.36082  | 3.70939E-06 | 0.005365862 |
| 1446.599972 | 161.291086 | 3.64012E-06 | 0.00526579  |
| 1446.639972 | 166.463281 | 3.75684E-06 | 0.005434801 |
| 1446.679972 | 178.119255 | 4.0199E-06  | 0.005815514 |
| 1446.719972 | 190.974065 | 4.31002E-06 | 0.00623539  |
| 1446.759972 | 193.108743 | 4.3582E-06  | 0.006305263 |
| 1446.799972 | 190.258167 | 4.29386E-06 | 0.006212359 |
| 1446.839972 | 176.337357 | 3.97969E-06 | 0.005757972 |
| 1446.879972 | 193.062283 | 4.35715E-06 | 0.006304268 |
| 1446.919972 | 211.760919 | 4.77915E-06 | 0.006915046 |
| 1446.959972 | 195.465873 | 4.41139E-06 | 0.006383108 |
| 1446.999972 | 179.183474 | 4.04392E-06 | 0.005851554 |
| 1447.039972 | 175.807529 | 3.96773E-06 | 0.005741465 |
| 1447.079972 | 185.981818 | 4.19735E-06 | 0.006073902 |
| 1447.119972 | 189.753064 | 4.28246E-06 | 0.006197237 |
| 1447.159972 | 205.054329 | 4.62779E-06 | 0.006697153 |
| 1447.199972 | 229.666003 | 5.18324E-06 | 0.007501187 |

|             |            |             |             |
|-------------|------------|-------------|-------------|
| 1447.239972 | 219.384823 | 4.95121E-06 | 0.007165589 |
| 1447.279972 | 190.514256 | 4.29964E-06 | 0.006222785 |
| 1447.319972 | 188.327036 | 4.25028E-06 | 0.006151514 |
| 1447.359972 | 199.792316 | 4.50903E-06 | 0.006526196 |
| 1447.399972 | 203.589442 | 4.59473E-06 | 0.006650412 |
| 1447.439972 | 196.861069 | 4.44288E-06 | 0.006430802 |
| 1447.479972 | 184.998494 | 4.17516E-06 | 0.006043458 |
| 1447.519972 | 174.862489 | 3.9464E-06  | 0.005712497 |
| 1447.559972 | 163.26608  | 3.68469E-06 | 0.005333807 |
| 1447.599972 | 152.501809 | 3.44175E-06 | 0.004982282 |
| 1447.639972 | 155.853502 | 3.5174E-06  | 0.005091924 |
| 1447.679972 | 159.952691 | 3.60991E-06 | 0.005225994 |
| 1447.719972 | 167.841776 | 3.78796E-06 | 0.005483898 |
| 1447.759972 | 173.57555  | 3.91736E-06 | 0.005671395 |
| 1447.799972 | 165.811017 | 3.74212E-06 | 0.005417847 |
| 1447.839972 | 178.388176 | 4.02597E-06 | 0.005828964 |
| 1447.879972 | 181.550001 | 4.09733E-06 | 0.005932443 |
| 1447.919972 | 174.271583 | 3.93307E-06 | 0.005694766 |
| 1447.959972 | 179.158137 | 4.04335E-06 | 0.005854608 |
| 1447.999972 | 172.619369 | 3.89578E-06 | 0.005641087 |
| 1448.039972 | 164.512976 | 3.71283E-06 | 0.005376324 |
| 1448.079972 | 159.615901 | 3.60231E-06 | 0.005216431 |
| 1448.119972 | 149.096142 | 3.36489E-06 | 0.004872768 |
| 1448.159972 | 159.777327 | 3.60595E-06 | 0.005221995 |
| 1448.199972 | 187.18424  | 4.22449E-06 | 0.006117903 |
| 1448.239972 | 226.817014 | 5.11894E-06 | 0.007413459 |
| 1448.279972 | 241.619087 | 5.45301E-06 | 0.00789748  |
| 1448.319972 | 247.408087 | 5.58366E-06 | 0.00808692  |
| 1448.359972 | 238.660972 | 5.38625E-06 | 0.007801223 |
| 1448.399972 | 225.134003 | 5.08096E-06 | 0.007359264 |
| 1448.439972 | 195.280289 | 4.4072E-06  | 0.006383571 |
| 1448.479972 | 182.706327 | 4.12343E-06 | 0.005972702 |
| 1448.519972 | 196.626243 | 4.43758E-06 | 0.006427924 |
| 1448.559972 | 175.637075 | 3.96388E-06 | 0.005741924 |
| 1448.599972 | 149.966349 | 3.38453E-06 | 0.004902832 |
| 1448.639972 | 134.931636 | 3.04522E-06 | 0.004411426 |
| 1448.679972 | 118.01205  | 2.66337E-06 | 0.003858367 |
| 1448.719972 | 120.641803 | 2.72272E-06 | 0.003944455 |
| 1448.759972 | 134.651646 | 3.0389E-06  | 0.004402637 |
| 1448.799972 | 140.659237 | 3.17448E-06 | 0.004599191 |
| 1448.839972 | 149.715566 | 3.37887E-06 | 0.004895445 |
| 1448.879972 | 179.588448 | 4.05306E-06 | 0.005872399 |
| 1448.919972 | 194.418409 | 4.38775E-06 | 0.006357503 |
| 1448.959972 | 184.919987 | 4.17339E-06 | 0.00604707  |
| 1448.999972 | 173.498844 | 3.91563E-06 | 0.005673744 |
| 1449.039972 | 177.131132 | 3.9976E-06  | 0.005792686 |

|             |            |             |             |
|-------------|------------|-------------|-------------|
| 1449.079972 | 208.699649 | 4.71006E-06 | 0.006825254 |
| 1449.119972 | 219.969653 | 4.96441E-06 | 0.007194024 |
| 1449.159972 | 233.611382 | 5.27228E-06 | 0.007640382 |
| 1449.199972 | 240.881127 | 5.43635E-06 | 0.00787836  |
| 1449.239972 | 234.468    | 5.29162E-06 | 0.007668822 |
| 1449.279972 | 233.172463 | 5.26238E-06 | 0.007626659 |
| 1449.319972 | 233.604571 | 5.27213E-06 | 0.007641003 |
| 1449.359972 | 243.447562 | 5.49427E-06 | 0.007963178 |
| 1449.399972 | 233.140953 | 5.26167E-06 | 0.007626259 |
| 1449.439972 | 226.665716 | 5.11553E-06 | 0.007414653 |
| 1449.479972 | 217.411408 | 4.90667E-06 | 0.007112124 |
| 1449.519972 | 196.304074 | 4.43031E-06 | 0.006421822 |
| 1449.559972 | 153.996824 | 3.47549E-06 | 0.005037937 |
| 1449.599972 | 127.456801 | 2.87652E-06 | 0.004169807 |
| 1449.639972 | 134.21693  | 3.02909E-06 | 0.004391089 |
| 1449.679972 | 161.894418 | 3.65373E-06 | 0.005296741 |
| 1449.719972 | 195.474901 | 4.4116E-06  | 0.006395579 |
| 1449.759972 | 184.120747 | 4.15535E-06 | 0.006024258 |
| 1449.799972 | 170.718005 | 3.85287E-06 | 0.005585887 |
| 1449.839972 | 173.909459 | 3.92489E-06 | 0.005690469 |
| 1449.879972 | 170.742141 | 3.85341E-06 | 0.005586985 |
| 1449.919972 | 153.005233 | 3.45311E-06 | 0.00500674  |
| 1449.959972 | 156.080498 | 3.52252E-06 | 0.005107512 |
| 1449.999972 | 169.912567 | 3.83469E-06 | 0.0055603   |
| 1450.039972 | 191.192309 | 4.31494E-06 | 0.006256841 |
| 1450.079972 | 207.16658  | 4.67546E-06 | 0.006779793 |
| 1450.119972 | 213.954786 | 4.82866E-06 | 0.007002138 |
| 1450.159972 | 203.721187 | 4.5977E-06  | 0.006667405 |
| 1450.199972 | 196.250168 | 4.42909E-06 | 0.00642307  |
| 1450.239972 | 203.526432 | 4.59331E-06 | 0.006661399 |
| 1450.279972 | 215.211994 | 4.85703E-06 | 0.00704406  |
| 1450.319972 | 227.548575 | 5.13545E-06 | 0.007448052 |
| 1450.359972 | 230.411695 | 5.20007E-06 | 0.007541975 |
| 1450.399972 | 219.780955 | 4.96015E-06 | 0.007194201 |
| 1450.439972 | 217.751736 | 4.91435E-06 | 0.007127975 |
| 1450.479972 | 193.254085 | 4.36148E-06 | 0.006326233 |
| 1450.519972 | 164.432651 | 3.71102E-06 | 0.005382903 |
| 1450.559972 | 153.670622 | 3.46813E-06 | 0.005030733 |
| 1450.599972 | 166.99733  | 3.7689E-06  | 0.005467162 |
| 1450.639972 | 170.420336 | 3.84615E-06 | 0.005579378 |
| 1450.679972 | 164.183066 | 3.70538E-06 | 0.005375325 |
| 1450.719972 | 161.926504 | 3.65446E-06 | 0.005301592 |
| 1450.759972 | 188.508921 | 4.25438E-06 | 0.00617209  |
| 1450.799972 | 196.186214 | 4.42765E-06 | 0.006423634 |
| 1450.839972 | 204.496041 | 4.61519E-06 | 0.006695903 |
| 1450.879972 | 202.188115 | 4.5631E-06  | 0.006620516 |

|             |            |             |             |
|-------------|------------|-------------|-------------|
| 1450.919972 | 190.197239 | 4.29249E-06 | 0.006228055 |
| 1450.959972 | 186.939957 | 4.21897E-06 | 0.006121563 |
| 1450.999972 | 196.41441  | 4.4328E-06  | 0.006431992 |
| 1451.039972 | 186.961359 | 4.21946E-06 | 0.006122601 |
| 1451.079972 | 183.56584  | 4.14283E-06 | 0.006011571 |
| 1451.119972 | 204.191159 | 4.60831E-06 | 0.006687211 |
| 1451.159972 | 225.039381 | 5.07883E-06 | 0.007370188 |
| 1451.199972 | 222.047225 | 5.0113E-06  | 0.007272393 |
| 1451.239972 | 200.654056 | 4.52848E-06 | 0.006571915 |
| 1451.279972 | 212.519897 | 4.79628E-06 | 0.006960742 |
| 1451.319972 | 229.297398 | 5.17492E-06 | 0.007510469 |
| 1451.359972 | 241.304704 | 5.44591E-06 | 0.007903977 |
| 1451.399972 | 235.685175 | 5.31909E-06 | 0.007720121 |
| 1451.439972 | 223.610056 | 5.04657E-06 | 0.00732479  |
| 1451.479972 | 219.595995 | 4.95598E-06 | 0.0071935   |
| 1451.519972 | 195.96025  | 4.42255E-06 | 0.006419419 |
| 1451.559972 | 174.569176 | 3.93978E-06 | 0.005718832 |
| 1451.599972 | 186.289805 | 4.2043E-06  | 0.006102964 |
| 1451.639972 | 196.221935 | 4.42846E-06 | 0.006428523 |
| 1451.679972 | 187.45862  | 4.23068E-06 | 0.006141593 |
| 1451.719972 | 175.42284  | 3.95905E-06 | 0.005747431 |
| 1451.759972 | 168.590791 | 3.80486E-06 | 0.005523742 |
| 1451.799972 | 173.893454 | 3.92453E-06 | 0.005697637 |
| 1451.839972 | 175.773232 | 3.96696E-06 | 0.005759387 |
| 1451.879972 | 167.925874 | 3.78985E-06 | 0.005502412 |
| 1451.919972 | 164.244018 | 3.70676E-06 | 0.005381917 |
| 1451.959972 | 174.492738 | 3.93806E-06 | 0.005717903 |
| 1451.999972 | 168.02312  | 3.79205E-06 | 0.005506053 |
| 1452.039972 | 166.287115 | 3.75287E-06 | 0.005449315 |
| 1452.079972 | 191.792732 | 4.32849E-06 | 0.006285321 |
| 1452.119972 | 218.193789 | 4.92433E-06 | 0.007150718 |
| 1452.159972 | 223.348039 | 5.04065E-06 | 0.007319836 |
| 1452.199972 | 213.458131 | 4.81745E-06 | 0.006995905 |
| 1452.239972 | 219.226093 | 4.94763E-06 | 0.007185143 |
| 1452.279972 | 240.955549 | 5.43803E-06 | 0.007897544 |
| 1452.319972 | 241.497459 | 5.45026E-06 | 0.007915523 |
| 1452.359972 | 229.418065 | 5.17765E-06 | 0.007519806 |
| 1452.399972 | 217.122566 | 4.90015E-06 | 0.007116983 |
| 1452.439972 | 211.788732 | 4.77978E-06 | 0.006942339 |
| 1452.479972 | 199.784751 | 4.50886E-06 | 0.006549034 |
| 1452.519972 | 192.995802 | 4.35565E-06 | 0.006326663 |
| 1452.559972 | 167.285963 | 3.77541E-06 | 0.005484011 |
| 1452.599972 | 144.618792 | 3.26384E-06 | 0.004741061 |
| 1452.639972 | 137.174939 | 3.09585E-06 | 0.004497152 |
| 1452.679972 | 151.223478 | 3.4129E-06  | 0.004957856 |
| 1452.719972 | 185.861514 | 4.19464E-06 | 0.006093631 |

|             |            |             |             |
|-------------|------------|-------------|-------------|
| 1452.759972 | 188.134285 | 4.24593E-06 | 0.006168315 |
| 1452.799972 | 179.704471 | 4.05568E-06 | 0.005892091 |
| 1452.839972 | 163.659628 | 3.69357E-06 | 0.005366166 |
| 1452.879972 | 154.024906 | 3.47613E-06 | 0.005050396 |
| 1452.919972 | 161.009477 | 3.63376E-06 | 0.005279562 |
| 1452.959972 | 194.656779 | 4.39313E-06 | 0.006383045 |
| 1452.999972 | 219.726356 | 4.95892E-06 | 0.007205307 |
| 1453.039972 | 209.982546 | 4.73901E-06 | 0.006885976 |
| 1453.079972 | 175.660419 | 3.96441E-06 | 0.005760606 |
| 1453.119972 | 168.370522 | 3.79989E-06 | 0.005521693 |
| 1453.159972 | 212.889969 | 4.80463E-06 | 0.006981896 |
| 1453.199972 | 248.105977 | 5.59941E-06 | 0.008137057 |
| 1453.239972 | 244.321315 | 5.51399E-06 | 0.008013153 |
| 1453.279972 | 246.422083 | 5.5614E-06  | 0.008082276 |
| 1453.319972 | 230.235807 | 5.1961E-06  | 0.007551598 |
| 1453.359972 | 213.938195 | 4.82829E-06 | 0.007017239 |
| 1453.399972 | 216.662979 | 4.88978E-06 | 0.007106809 |
| 1453.439972 | 222.252523 | 5.01593E-06 | 0.007290353 |
| 1453.479972 | 229.649747 | 5.18287E-06 | 0.007533205 |
| 1453.519972 | 213.501591 | 4.81843E-06 | 0.007003689 |
| 1453.559972 | 185.042689 | 4.17616E-06 | 0.006070293 |
| 1453.599972 | 157.535121 | 3.55535E-06 | 0.005168054 |
| 1453.639972 | 160.258131 | 3.6168E-06  | 0.005257529 |
| 1453.679972 | 158.797601 | 3.58384E-06 | 0.005209757 |
| 1453.719972 | 158.290319 | 3.57239E-06 | 0.005193258 |
| 1453.759972 | 162.634636 | 3.67044E-06 | 0.005335935 |
| 1453.799972 | 178.976128 | 4.03924E-06 | 0.00587225  |
| 1453.839972 | 173.745654 | 3.9212E-06  | 0.005700794 |
| 1453.879972 | 174.997887 | 3.94946E-06 | 0.005742039 |
| 1453.919972 | 176.197421 | 3.97653E-06 | 0.005781557 |
| 1453.959972 | 161.317024 | 3.6407E-06  | 0.005293433 |
| 1453.999972 | 169.443137 | 3.8241E-06  | 0.005560235 |
| 1454.039972 | 179.367917 | 4.04808E-06 | 0.005886076 |
| 1454.079972 | 189.635248 | 4.2798E-06  | 0.006223176 |
| 1454.119972 | 196.487064 | 4.43444E-06 | 0.006448207 |
| 1454.159972 | 183.515358 | 4.14169E-06 | 0.006022674 |
| 1454.199972 | 162.08538  | 3.65804E-06 | 0.005319523 |
| 1454.239972 | 169.574487 | 3.82706E-06 | 0.005565464 |
| 1454.279972 | 183.408193 | 4.13927E-06 | 0.006019654 |
| 1454.319972 | 191.774875 | 4.32809E-06 | 0.00629443  |
| 1454.359972 | 199.050415 | 4.49229E-06 | 0.006533408 |
| 1454.399972 | 189.072911 | 4.26711E-06 | 0.006206088 |
| 1454.439972 | 193.757165 | 4.37283E-06 | 0.006360018 |
| 1454.479972 | 177.613353 | 4.00849E-06 | 0.005830263 |
| 1454.519972 | 155.915157 | 3.51879E-06 | 0.005118147 |
| 1454.559972 | 153.947048 | 3.47437E-06 | 0.00505368  |

|             |            |             |             |
|-------------|------------|-------------|-------------|
| 1454.599972 | 169.196084 | 3.81852E-06 | 0.005554419 |
| 1454.639972 | 176.61526  | 3.98596E-06 | 0.005798137 |
| 1454.679972 | 178.109429 | 4.01968E-06 | 0.005847351 |
| 1454.719972 | 162.499958 | 3.6674E-06  | 0.005335037 |
| 1454.759972 | 156.144391 | 3.52396E-06 | 0.005126518 |
| 1454.799972 | 179.591242 | 4.05312E-06 | 0.005896485 |
| 1454.839972 | 193.467178 | 4.36628E-06 | 0.006352246 |
| 1454.879972 | 173.754339 | 3.92139E-06 | 0.005705157 |
| 1454.919972 | 166.847095 | 3.76551E-06 | 0.005478511 |
| 1454.959972 | 155.699646 | 3.51392E-06 | 0.005112619 |
| 1454.999972 | 163.062969 | 3.6801E-06  | 0.005354551 |
| 1455.039972 | 172.486002 | 3.89277E-06 | 0.005664134 |
| 1455.079972 | 173.392167 | 3.91322E-06 | 0.005694048 |
| 1455.119972 | 185.206613 | 4.17986E-06 | 0.006082191 |
| 1455.159972 | 196.934482 | 4.44454E-06 | 0.006467512 |
| 1455.199972 | 199.110756 | 4.49365E-06 | 0.006539163 |
| 1455.239972 | 212.344027 | 4.79231E-06 | 0.006973959 |
| 1455.279972 | 241.926386 | 5.45994E-06 | 0.007945744 |
| 1455.319972 | 273.929777 | 6.18221E-06 | 0.008997099 |
| 1455.359972 | 264.485159 | 5.96906E-06 | 0.008687133 |
| 1455.399972 | 237.13668  | 5.35184E-06 | 0.007789074 |
| 1455.439972 | 218.109739 | 4.92243E-06 | 0.007164306 |
| 1455.479972 | 196.591983 | 4.43681E-06 | 0.006457684 |
| 1455.519972 | 164.517129 | 3.71292E-06 | 0.005404233 |
| 1455.559972 | 141.638091 | 3.19657E-06 | 0.004652806 |
| 1455.599972 | 146.09361  | 3.29713E-06 | 0.004799301 |
| 1455.639972 | 172.814721 | 3.90019E-06 | 0.005677269 |
| 1455.679972 | 165.30595  | 3.73073E-06 | 0.005430742 |
| 1455.719972 | 169.23063  | 3.8193E-06  | 0.005559831 |
| 1455.759972 | 201.338111 | 4.54392E-06 | 0.006614858 |
| 1455.799972 | 195.524259 | 4.41271E-06 | 0.006424023 |
| 1455.839972 | 156.374979 | 3.52917E-06 | 0.0051379   |
| 1455.879972 | 151.983789 | 3.43006E-06 | 0.004993759 |
| 1455.919972 | 171.801172 | 3.87731E-06 | 0.005645058 |
| 1455.959972 | 168.827161 | 3.81019E-06 | 0.00554749  |
| 1455.999972 | 167.944631 | 3.79028E-06 | 0.005518642 |
| 1456.039972 | 165.320209 | 3.73105E-06 | 0.005432553 |
| 1456.079972 | 166.9977   | 3.76891E-06 | 0.005487828 |
| 1456.119972 | 184.259257 | 4.15847E-06 | 0.006055238 |
| 1456.159972 | 204.932633 | 4.62504E-06 | 0.006734804 |
| 1456.199972 | 204.850308 | 4.62319E-06 | 0.006732283 |
| 1456.239972 | 207.957328 | 4.69331E-06 | 0.006834582 |
| 1456.279972 | 207.640853 | 4.68616E-06 | 0.006824368 |
| 1456.319972 | 222.319382 | 5.01744E-06 | 0.007306996 |
| 1456.359972 | 234.117869 | 5.28371E-06 | 0.00769499  |
| 1456.399972 | 233.96239  | 5.28021E-06 | 0.007690091 |

|             |            |             |             |
|-------------|------------|-------------|-------------|
| 1456.439972 | 233.54484  | 5.27078E-06 | 0.007676577 |
| 1456.479972 | 197.00158  | 4.44605E-06 | 0.006475585 |
| 1456.519972 | 186.551544 | 4.21021E-06 | 0.006132253 |
| 1456.559972 | 178.434599 | 4.02702E-06 | 0.005865597 |
| 1456.599972 | 171.796646 | 3.87721E-06 | 0.005647545 |
| 1456.639972 | 163.500539 | 3.68998E-06 | 0.005374972 |
| 1456.679972 | 171.738055 | 3.87589E-06 | 0.005645929 |
| 1456.719972 | 185.487833 | 4.1862E-06  | 0.006098124 |
| 1456.759972 | 195.320783 | 4.40812E-06 | 0.00642157  |
| 1456.799972 | 200.64957  | 4.52838E-06 | 0.006596946 |
| 1456.839972 | 192.969585 | 4.35505E-06 | 0.006344618 |
| 1456.879972 | 183.017445 | 4.13045E-06 | 0.006017568 |
| 1456.919972 | 180.12702  | 4.06522E-06 | 0.005922694 |
| 1456.959972 | 183.626481 | 4.14419E-06 | 0.006037925 |
| 1456.999972 | 188.563506 | 4.25562E-06 | 0.006200432 |
| 1457.039972 | 182.968255 | 4.12934E-06 | 0.006016611 |
| 1457.079972 | 186.500827 | 4.20906E-06 | 0.006132943 |
| 1457.119972 | 178.317107 | 4.02437E-06 | 0.005863988 |
| 1457.159972 | 165.452755 | 3.73404E-06 | 0.005441091 |
| 1457.199972 | 189.784406 | 4.28317E-06 | 0.006241435 |
| 1457.239972 | 215.214003 | 4.85708E-06 | 0.007077932 |
| 1457.279972 | 214.98966  | 4.85202E-06 | 0.007070747 |
| 1457.319972 | 214.696043 | 4.84539E-06 | 0.007061285 |
| 1457.359972 | 213.707027 | 4.82307E-06 | 0.007028949 |
| 1457.399972 | 215.060966 | 4.85363E-06 | 0.007073675 |
| 1457.439972 | 225.82586  | 5.09658E-06 | 0.007427952 |
| 1457.479972 | 212.118238 | 4.78721E-06 | 0.006977267 |
| 1457.519972 | 192.452477 | 4.34338E-06 | 0.006330569 |
| 1457.559972 | 166.035784 | 3.7472E-06  | 0.005461763 |
| 1457.599972 | 178.991823 | 4.0396E-06  | 0.005888115 |
| 1457.639972 | 195.286907 | 4.40735E-06 | 0.006424335 |
| 1457.679972 | 189.844095 | 4.28452E-06 | 0.006245454 |
| 1457.719972 | 185.384804 | 4.18388E-06 | 0.006098921 |
| 1457.759972 | 185.782177 | 4.19284E-06 | 0.006112162 |
| 1457.799972 | 169.409252 | 3.82333E-06 | 0.005573652 |
| 1457.839972 | 156.863032 | 3.54018E-06 | 0.005161016 |
| 1457.879972 | 161.493015 | 3.64467E-06 | 0.005313495 |
| 1457.919972 | 175.546729 | 3.96185E-06 | 0.005776053 |
| 1457.959972 | 198.79098  | 4.48644E-06 | 0.006541043 |
| 1457.999972 | 194.944081 | 4.39962E-06 | 0.006414641 |
| 1458.039972 | 168.961251 | 3.81322E-06 | 0.005559827 |
| 1458.079972 | 152.069305 | 3.43199E-06 | 0.005004119 |
| 1458.119972 | 175.373885 | 3.95794E-06 | 0.005771158 |
| 1458.159972 | 211.117376 | 4.76463E-06 | 0.006947586 |
| 1458.199972 | 225.786101 | 5.09568E-06 | 0.007430517 |
| 1458.239972 | 209.029588 | 4.71751E-06 | 0.006879257 |



|             |            |             |             |
|-------------|------------|-------------|-------------|
| 1458.279972 | 209.867955 | 4.73643E-06 | 0.006907037 |
| 1458.319972 | 241.930856 | 5.46004E-06 | 0.007962489 |
| 1458.359972 | 228.416638 | 5.15505E-06 | 0.007517912 |
| 1458.399972 | 213.687926 | 4.82264E-06 | 0.007033336 |
| 1458.439972 | 213.262084 | 4.81303E-06 | 0.007019513 |
| 1458.479972 | 193.18369  | 4.35989E-06 | 0.006358808 |
| 1458.519972 | 171.420816 | 3.86873E-06 | 0.005642619 |
| 1458.559972 | 157.310283 | 3.55027E-06 | 0.005178288 |
| 1458.599972 | 167.095558 | 3.77111E-06 | 0.005500547 |
| 1458.639972 | 183.202174 | 4.13462E-06 | 0.006030919 |
| 1458.679972 | 179.418645 | 4.04923E-06 | 0.005906529 |
| 1458.719972 | 180.88068  | 4.08223E-06 | 0.005954823 |
| 1458.759972 | 185.819929 | 4.1937E-06  | 0.006117597 |
| 1458.799972 | 205.460548 | 4.63696E-06 | 0.006764395 |
| 1458.839972 | 244.015356 | 5.50709E-06 | 0.008033958 |
| 1458.879972 | 255.289879 | 5.76154E-06 | 0.008405391 |
| 1458.919972 | 246.042322 | 5.55283E-06 | 0.008101138 |
| 1458.959972 | 228.669372 | 5.16075E-06 | 0.007529327 |
| 1458.999972 | 207.183413 | 4.67584E-06 | 0.006822052 |
| 1459.039972 | 192.050847 | 4.33432E-06 | 0.006323946 |
| 1459.079972 | 195.276739 | 4.40712E-06 | 0.006430346 |
| 1459.119972 | 192.10329  | 4.3355E-06  | 0.00632602  |
| 1459.159972 | 228.975855 | 5.16767E-06 | 0.007540452 |
| 1459.199972 | 279.789196 | 6.31445E-06 | 0.009214049 |
| 1459.239972 | 272.175158 | 6.14261E-06 | 0.008963548 |
| 1459.279972 | 254.025414 | 5.733E-06   | 0.008366052 |
| 1459.319972 | 257.660711 | 5.81504E-06 | 0.008486009 |
| 1459.359972 | 258.137335 | 5.8258E-06  | 0.008501939 |
| 1459.399972 | 258.538901 | 5.83486E-06 | 0.008515399 |
| 1459.439972 | 253.541271 | 5.72207E-06 | 0.008351023 |
| 1459.479972 | 233.910682 | 5.27904E-06 | 0.007704651 |
| 1459.519972 | 221.808292 | 5.0059E-06  | 0.007306217 |
| 1459.559972 | 209.066718 | 4.71834E-06 | 0.006886707 |
| 1459.599972 | 182.229705 | 4.11267E-06 | 0.006002854 |
| 1459.639972 | 164.149424 | 3.70462E-06 | 0.005407417 |
| 1459.679972 | 148.295886 | 3.34683E-06 | 0.004885303 |
| 1459.719972 | 146.493461 | 3.30615E-06 | 0.004826058 |
| 1459.759972 | 166.207281 | 3.75107E-06 | 0.005475657 |
| 1459.799972 | 181.668782 | 4.10001E-06 | 0.005985196 |
| 1459.839972 | 194.853398 | 4.39757E-06 | 0.006419748 |
| 1459.879972 | 199.122926 | 4.49393E-06 | 0.006560594 |
| 1459.919972 | 202.977285 | 4.58091E-06 | 0.006687769 |
| 1459.959972 | 196.270146 | 4.42954E-06 | 0.006466957 |
| 1459.999972 | 198.946924 | 4.48995E-06 | 0.006555334 |
| 1460.039972 | 196.024266 | 4.42399E-06 | 0.006459209 |
| 1460.079972 | 193.112242 | 4.35827E-06 | 0.006363429 |

|             |            |             |             |
|-------------|------------|-------------|-------------|
| 1460.119972 | 197.969846 | 4.4679E-06  | 0.006523675 |
| 1460.159972 | 221.962648 | 5.00939E-06 | 0.007314508 |
| 1460.199972 | 242.169205 | 5.46542E-06 | 0.007980609 |
| 1460.239972 | 263.470756 | 5.94617E-06 | 0.008682832 |
| 1460.279972 | 280.968391 | 6.34107E-06 | 0.009259731 |
| 1460.319972 | 259.317695 | 5.85244E-06 | 0.008546434 |
| 1460.359972 | 257.065469 | 5.80161E-06 | 0.008472438 |
| 1460.399972 | 270.758711 | 6.11065E-06 | 0.008923989 |
| 1460.439972 | 243.298294 | 5.4909E-06  | 0.008019135 |
| 1460.479972 | 205.781161 | 4.64419E-06 | 0.006782753 |
| 1460.519972 | 187.03547  | 4.22113E-06 | 0.006165045 |
| 1460.559972 | 178.590025 | 4.03053E-06 | 0.005886828 |
| 1460.599972 | 156.148091 | 3.52404E-06 | 0.00514722  |
| 1460.639972 | 142.069647 | 3.20631E-06 | 0.00468327  |
| 1460.679972 | 175.652959 | 3.96424E-06 | 0.00579049  |
| 1460.719972 | 209.212053 | 4.72162E-06 | 0.006896971 |
| 1460.759972 | 234.768486 | 5.2984E-06  | 0.007739687 |
| 1460.799972 | 239.875969 | 5.41367E-06 | 0.007908284 |
| 1460.839972 | 231.423127 | 5.2229E-06  | 0.007629818 |
| 1460.879972 | 220.90126  | 4.98543E-06 | 0.00728312  |
| 1460.919972 | 204.570588 | 4.61687E-06 | 0.006744882 |
| 1460.959972 | 175.945966 | 3.97086E-06 | 0.005801261 |
| 1460.999972 | 176.940836 | 3.99331E-06 | 0.005834223 |
| 1461.039972 | 184.294224 | 4.15926E-06 | 0.006076851 |
| 1461.079972 | 195.068499 | 4.40242E-06 | 0.006432294 |
| 1461.119972 | 212.905353 | 4.80498E-06 | 0.007020648 |
| 1461.159972 | 222.851484 | 5.02945E-06 | 0.007348827 |
| 1461.199972 | 211.085212 | 4.7639E-06  | 0.006961009 |
| 1461.239972 | 210.776276 | 4.75693E-06 | 0.006951012 |
| 1461.279972 | 225.3925   | 5.08679E-06 | 0.007433231 |
| 1461.319972 | 255.561279 | 5.76766E-06 | 0.0084284   |
| 1461.359972 | 272.809978 | 6.15694E-06 | 0.008997507 |
| 1461.399972 | 245.98002  | 5.55143E-06 | 0.008112854 |
| 1461.439972 | 199.322909 | 4.49844E-06 | 0.006574201 |
| 1461.479972 | 159.351751 | 3.59635E-06 | 0.005255989 |
| 1461.519972 | 147.670706 | 3.33272E-06 | 0.00487084  |
| 1461.559972 | 151.392199 | 3.41671E-06 | 0.004993728 |
| 1461.599972 | 162.472133 | 3.66677E-06 | 0.005359351 |
| 1461.639972 | 159.974198 | 3.61039E-06 | 0.005277097 |
| 1461.679972 | 153.931325 | 3.47402E-06 | 0.005077899 |
| 1461.719972 | 146.251739 | 3.3007E-06  | 0.004824696 |
| 1461.759972 | 164.645105 | 3.71581E-06 | 0.005431623 |
| 1461.799972 | 178.451113 | 4.02739E-06 | 0.005887243 |
| 1461.839972 | 165.309985 | 3.73082E-06 | 0.005453856 |
| 1461.879972 | 153.479649 | 3.46382E-06 | 0.005063692 |
| 1461.919972 | 154.566449 | 3.48835E-06 | 0.005099688 |

|             |            |             |             |
|-------------|------------|-------------|-------------|
| 1461.959972 | 146.255555 | 3.30078E-06 | 0.004825614 |
| 1461.999972 | 144.693731 | 3.26554E-06 | 0.004774213 |
| 1462.039972 | 162.400165 | 3.66515E-06 | 0.005358589 |
| 1462.079972 | 177.790071 | 4.01247E-06 | 0.005866558 |
| 1462.119972 | 170.203777 | 3.84126E-06 | 0.005616386 |
| 1462.159972 | 173.942982 | 3.92565E-06 | 0.005739929 |
| 1462.199972 | 174.404368 | 3.93606E-06 | 0.005755312 |
| 1462.239972 | 176.209629 | 3.97681E-06 | 0.005815045 |
| 1462.279972 | 178.652195 | 4.03193E-06 | 0.005895812 |
| 1462.319972 | 202.284481 | 4.56528E-06 | 0.006675899 |
| 1462.359972 | 220.165868 | 4.96884E-06 | 0.007266228 |
| 1462.399972 | 223.459254 | 5.04316E-06 | 0.007375123 |
| 1462.439972 | 226.977333 | 5.12256E-06 | 0.00749144  |
| 1462.479972 | 216.029589 | 4.87549E-06 | 0.007130302 |
| 1462.519972 | 191.899632 | 4.33091E-06 | 0.006334039 |
| 1462.559972 | 178.445559 | 4.02727E-06 | 0.005890121 |
| 1462.599972 | 163.101213 | 3.68097E-06 | 0.005383783 |
| 1462.639972 | 158.492813 | 3.57696E-06 | 0.005231808 |
| 1462.679972 | 163.094988 | 3.68083E-06 | 0.005383872 |
| 1462.719972 | 152.654392 | 3.4452E-06  | 0.005039358 |
| 1462.759972 | 146.093504 | 3.29713E-06 | 0.004822905 |
| 1462.799972 | 170.129576 | 3.83959E-06 | 0.005616549 |
| 1462.839972 | 194.426822 | 4.38794E-06 | 0.006418858 |
| 1462.879972 | 186.220632 | 4.20274E-06 | 0.006148105 |
| 1462.919972 | 173.675813 | 3.91962E-06 | 0.005734092 |
| 1462.959972 | 166.663856 | 3.76137E-06 | 0.005502735 |
| 1462.999972 | 170.128721 | 3.83957E-06 | 0.005617288 |
| 1463.039972 | 190.418077 | 4.29747E-06 | 0.006287372 |
| 1463.079972 | 210.091823 | 4.74148E-06 | 0.006937164 |
| 1463.119972 | 216.305157 | 4.88171E-06 | 0.007142522 |
| 1463.159972 | 206.089567 | 4.65115E-06 | 0.006805383 |
| 1463.199972 | 212.195382 | 4.78895E-06 | 0.007007198 |
| 1463.239972 | 228.596863 | 5.15911E-06 | 0.00754902  |
| 1463.279972 | 254.001352 | 5.73246E-06 | 0.008388189 |
| 1463.319972 | 254.606114 | 5.74611E-06 | 0.008408391 |
| 1463.359972 | 236.455195 | 5.33646E-06 | 0.007809168 |
| 1463.399972 | 231.085211 | 5.21527E-06 | 0.007632028 |
| 1463.439972 | 216.639992 | 4.88926E-06 | 0.007155143 |
| 1463.479972 | 207.447076 | 4.68179E-06 | 0.006851708 |
| 1463.519972 | 205.84014  | 4.64553E-06 | 0.006798819 |
| 1463.559972 | 189.403357 | 4.27457E-06 | 0.006256089 |
| 1463.599972 | 172.250442 | 3.88745E-06 | 0.005689675 |
| 1463.639972 | 167.730774 | 3.78545E-06 | 0.005540536 |
| 1463.679972 | 184.071413 | 4.15424E-06 | 0.006080471 |
| 1463.719972 | 193.701581 | 4.37157E-06 | 0.006398761 |
| 1463.759972 | 188.507701 | 4.25436E-06 | 0.006227356 |

|             |            |             |             |
|-------------|------------|-------------|-------------|
| 1463.799972 | 175.760887 | 3.96668E-06 | 0.005806424 |
| 1463.839972 | 166.178994 | 3.75043E-06 | 0.005490027 |
| 1463.879972 | 156.323016 | 3.52799E-06 | 0.005164558 |
| 1463.919972 | 155.474751 | 3.50885E-06 | 0.005136674 |
| 1463.959972 | 159.46275  | 3.59885E-06 | 0.005268575 |
| 1463.999972 | 162.090524 | 3.65816E-06 | 0.005355542 |
| 1464.039972 | 166.568392 | 3.75922E-06 | 0.005503643 |
| 1464.079972 | 162.951116 | 3.67758E-06 | 0.005384271 |
| 1464.119972 | 167.366939 | 3.77724E-06 | 0.005530331 |
| 1464.159972 | 197.405036 | 4.45516E-06 | 0.006523062 |
| 1464.199972 | 211.403427 | 4.77108E-06 | 0.006985817 |
| 1464.239972 | 207.862078 | 4.69116E-06 | 0.00686898  |
| 1464.279972 | 207.333988 | 4.67924E-06 | 0.006851716 |
| 1464.319972 | 219.612673 | 4.95635E-06 | 0.007257685 |
| 1464.359972 | 219.921885 | 4.96333E-06 | 0.007268103 |
| 1464.399972 | 207.910774 | 4.69226E-06 | 0.00687134  |
| 1464.439972 | 189.430191 | 4.27518E-06 | 0.006260738 |
| 1464.479972 | 174.271549 | 3.93307E-06 | 0.005759897 |
| 1464.519972 | 156.753027 | 3.5377E-06  | 0.005181029 |
| 1464.559972 | 155.707876 | 3.51411E-06 | 0.005146625 |
| 1464.599972 | 173.692981 | 3.92001E-06 | 0.005741245 |
| 1464.639972 | 178.44471  | 4.02725E-06 | 0.005898469 |
| 1464.679972 | 192.686261 | 4.34866E-06 | 0.006369396 |
| 1464.719972 | 202.658649 | 4.57372E-06 | 0.006699224 |
| 1464.759972 | 201.571382 | 4.54919E-06 | 0.006663465 |
| 1464.799972 | 179.24284  | 4.04526E-06 | 0.005925499 |
| 1464.839972 | 173.633527 | 3.91867E-06 | 0.00574022  |
| 1464.879972 | 182.527124 | 4.11938E-06 | 0.006034402 |
| 1464.919972 | 173.503197 | 3.91573E-06 | 0.005736224 |
| 1464.959972 | 171.22086  | 3.86422E-06 | 0.005660922 |
| 1464.999972 | 191.146663 | 4.31391E-06 | 0.006319884 |
| 1465.039972 | 215.859928 | 4.87166E-06 | 0.007137174 |
| 1465.079972 | 206.60468  | 4.66278E-06 | 0.006831345 |
| 1465.119972 | 188.361374 | 4.25105E-06 | 0.006228304 |
| 1465.159972 | 190.741293 | 4.30477E-06 | 0.00630717  |
| 1465.199972 | 226.455718 | 5.11079E-06 | 0.00748833  |
| 1465.239972 | 233.816665 | 5.27692E-06 | 0.007731949 |
| 1465.279972 | 229.736892 | 5.18484E-06 | 0.007597245 |
| 1465.319972 | 227.133018 | 5.12608E-06 | 0.007511341 |
| 1465.359972 | 224.280261 | 5.06169E-06 | 0.007417202 |
| 1465.399972 | 222.234578 | 5.01552E-06 | 0.00734975  |
| 1465.439972 | 204.404184 | 4.61312E-06 | 0.006760247 |
| 1465.479972 | 199.856255 | 4.51048E-06 | 0.006610014 |
| 1465.519972 | 184.167699 | 4.15641E-06 | 0.0060913   |
| 1465.559972 | 170.249535 | 3.84229E-06 | 0.005631114 |
| 1465.599972 | 186.818548 | 4.21623E-06 | 0.006179313 |

|             |            |             |             |
|-------------|------------|-------------|-------------|
| 1465.639972 | 182.679828 | 4.12283E-06 | 0.006042583 |
| 1465.679972 | 152.36418  | 3.43865E-06 | 0.005039957 |
| 1465.719972 | 147.844059 | 3.33663E-06 | 0.004890572 |
| 1465.759972 | 169.616294 | 3.828E-06   | 0.005610934 |
| 1465.799972 | 178.941511 | 4.03846E-06 | 0.005919576 |
| 1465.839972 | 166.736569 | 3.76301E-06 | 0.005515974 |
| 1465.879972 | 154.465908 | 3.48608E-06 | 0.005110175 |
| 1465.919972 | 143.645127 | 3.24187E-06 | 0.004752323 |
| 1465.959972 | 153.248916 | 3.45861E-06 | 0.005070191 |
| 1465.999972 | 181.891521 | 4.10504E-06 | 0.006017986 |
| 1466.039972 | 191.547995 | 4.32297E-06 | 0.006337649 |
| 1466.079972 | 187.69777  | 4.23608E-06 | 0.006210428 |
| 1466.119972 | 196.988736 | 4.44576E-06 | 0.00651802  |
| 1466.159972 | 190.401426 | 4.29709E-06 | 0.006300229 |
| 1466.199972 | 196.549607 | 4.43585E-06 | 0.006503844 |
| 1466.239972 | 218.348476 | 4.92782E-06 | 0.007225368 |
| 1466.279972 | 221.684201 | 5.0031E-06  | 0.007335951 |
| 1466.319972 | 201.668712 | 4.55138E-06 | 0.006673782 |
| 1466.359972 | 199.876399 | 4.51093E-06 | 0.00661465  |
| 1466.399972 | 197.132707 | 4.44901E-06 | 0.006524029 |
| 1466.439972 | 178.296285 | 4.0239E-06  | 0.005900806 |
| 1466.479972 | 161.431398 | 3.64328E-06 | 0.0053428   |
| 1466.519972 | 170.365138 | 3.8449E-06  | 0.005638628 |
| 1466.559972 | 182.326894 | 4.11486E-06 | 0.006034695 |
| 1466.599972 | 198.030394 | 4.46927E-06 | 0.006554631 |
| 1466.639972 | 185.756103 | 4.19226E-06 | 0.006148531 |
| 1466.679972 | 163.832983 | 3.69748E-06 | 0.005423023 |
| 1466.719972 | 165.543124 | 3.73608E-06 | 0.00547978  |
| 1466.759972 | 186.218596 | 4.20269E-06 | 0.006164344 |
| 1466.799972 | 197.468076 | 4.45658E-06 | 0.006536911 |
| 1466.839972 | 204.476701 | 4.61475E-06 | 0.006769106 |
| 1466.879972 | 199.298554 | 4.49789E-06 | 0.006597866 |
| 1466.919972 | 190.904922 | 4.30846E-06 | 0.006320163 |
| 1466.959972 | 174.569807 | 3.9398E-06  | 0.005779525 |
| 1466.999972 | 178.786209 | 4.03496E-06 | 0.00591928  |
| 1467.039972 | 203.55457  | 4.59394E-06 | 0.006739498 |
| 1467.079972 | 213.113548 | 4.80968E-06 | 0.007056179 |
| 1467.119972 | 214.30251  | 4.83651E-06 | 0.007095739 |
| 1467.159972 | 217.906854 | 4.91785E-06 | 0.007215279 |
| 1467.199972 | 240.790954 | 5.43432E-06 | 0.007973229 |
| 1467.239972 | 255.890449 | 5.77509E-06 | 0.008473444 |
| 1467.279972 | 290.560171 | 6.55754E-06 | 0.009621745 |
| 1467.319972 | 286.259757 | 6.46048E-06 | 0.009479597 |
| 1467.359972 | 239.506019 | 5.40532E-06 | 0.007931546 |
| 1467.399972 | 216.896773 | 4.89506E-06 | 0.007183008 |
| 1467.439972 | 211.417956 | 4.77141E-06 | 0.007001756 |

|             |            |             |             |
|-------------|------------|-------------|-------------|
| 1467.479972 | 215.70626  | 4.86819E-06 | 0.007143971 |
| 1467.519972 | 193.645303 | 4.3703E-06  | 0.00641351  |
| 1467.559972 | 163.219837 | 3.68364E-06 | 0.005405969 |
| 1467.599972 | 166.065381 | 3.74786E-06 | 0.005500366 |
| 1467.639972 | 170.417803 | 3.84609E-06 | 0.005644679 |
| 1467.679972 | 182.365956 | 4.11575E-06 | 0.006040597 |
| 1467.719972 | 189.245689 | 4.27101E-06 | 0.006268649 |
| 1467.759972 | 180.929196 | 4.08332E-06 | 0.005993334 |
| 1467.799972 | 196.422208 | 4.43298E-06 | 0.006506722 |
| 1467.839972 | 199.67263  | 4.50633E-06 | 0.006614576 |
| 1467.879972 | 188.493526 | 4.25404E-06 | 0.006244415 |
| 1467.919972 | 168.052215 | 3.7927E-06  | 0.005567387 |
| 1467.959972 | 151.056671 | 3.40914E-06 | 0.005004479 |
| 1467.999972 | 136.682332 | 3.08473E-06 | 0.004528383 |
| 1468.039972 | 140.185352 | 3.16379E-06 | 0.004644567 |
| 1468.079972 | 152.002841 | 3.43049E-06 | 0.005036237 |
| 1468.119972 | 154.108933 | 3.47802E-06 | 0.005106156 |
| 1468.159972 | 179.583046 | 4.05294E-06 | 0.005950363 |
| 1468.199972 | 205.152662 | 4.63001E-06 | 0.00679778  |
| 1468.239972 | 223.558356 | 5.0454E-06  | 0.007407859 |
| 1468.279972 | 241.702665 | 5.45489E-06 | 0.008009309 |
| 1468.319972 | 276.255652 | 6.23471E-06 | 0.009154542 |
| 1468.359972 | 281.043537 | 6.34276E-06 | 0.009313457 |
| 1468.399972 | 270.118783 | 6.0962E-06  | 0.008951667 |
| 1468.439972 | 250.35188  | 5.65009E-06 | 0.008296823 |
| 1468.479972 | 225.858454 | 5.09731E-06 | 0.007485299 |
| 1468.519972 | 194.924197 | 4.39917E-06 | 0.006460266 |
| 1468.559972 | 173.094706 | 3.90651E-06 | 0.005736939 |
| 1468.599972 | 165.455044 | 3.73409E-06 | 0.005483884 |
| 1468.639972 | 182.100017 | 4.10974E-06 | 0.006035734 |
| 1468.679972 | 210.850835 | 4.75861E-06 | 0.006988875 |
| 1468.719972 | 220.979487 | 4.9872E-06  | 0.007324799 |
| 1468.759972 | 214.383407 | 4.83833E-06 | 0.007106353 |
| 1468.799972 | 226.920177 | 5.12127E-06 | 0.007522125 |
| 1468.839972 | 243.857973 | 5.50353E-06 | 0.008083812 |
| 1468.879972 | 262.973916 | 5.93495E-06 | 0.008717737 |
| 1468.919972 | 258.306083 | 5.82961E-06 | 0.008563228 |
| 1468.959972 | 244.147306 | 5.51006E-06 | 0.008094064 |
| 1468.999972 | 208.215262 | 4.69913E-06 | 0.00690302  |
| 1469.039972 | 179.00729  | 4.03995E-06 | 0.005934841 |
| 1469.079972 | 184.3772   | 4.16114E-06 | 0.006113042 |
| 1469.119972 | 210.576215 | 4.75241E-06 | 0.006981863 |
| 1469.159972 | 224.360785 | 5.06351E-06 | 0.007439107 |
| 1469.199972 | 220.275228 | 4.97131E-06 | 0.007303841 |
| 1469.239972 | 219.738791 | 4.9592E-06  | 0.007286253 |
| 1469.279972 | 250.407495 | 5.65135E-06 | 0.008303413 |

|             |            |             |             |
|-------------|------------|-------------|-------------|
| 1469.319972 | 285.475482 | 6.44278E-06 | 0.009466511 |
| 1469.359972 | 331.322341 | 7.47748E-06 | 0.010987115 |
| 1469.399972 | 348.475561 | 7.86461E-06 | 0.011556255 |
| 1469.439972 | 293.865461 | 6.63213E-06 | 0.009745523 |
| 1469.479972 | 239.325405 | 5.40124E-06 | 0.007937016 |
| 1469.519972 | 189.07922  | 4.26725E-06 | 0.006270816 |
| 1469.559972 | 165.842372 | 3.74283E-06 | 0.005500315 |
| 1469.599972 | 161.463493 | 3.64401E-06 | 0.005355231 |
| 1469.639972 | 161.840638 | 3.65252E-06 | 0.005367886 |
| 1469.679972 | 164.635013 | 3.71558E-06 | 0.005460718 |
| 1469.719972 | 167.697841 | 3.78471E-06 | 0.005562459 |
| 1469.759972 | 166.965811 | 3.76819E-06 | 0.005538329 |
| 1469.799972 | 171.154807 | 3.86273E-06 | 0.005677434 |
| 1469.839972 | 187.214794 | 4.22518E-06 | 0.006210334 |
| 1469.879972 | 230.769793 | 5.20815E-06 | 0.007655359 |
| 1469.919972 | 247.378678 | 5.58299E-06 | 0.008206552 |
| 1469.959972 | 217.666821 | 4.91244E-06 | 0.007221086 |
| 1469.999972 | 202.967128 | 4.58069E-06 | 0.006733607 |
| 1470.039972 | 177.981416 | 4.01679E-06 | 0.005904846 |
| 1470.079972 | 155.98251  | 3.52031E-06 | 0.005175134 |
| 1470.119972 | 157.650977 | 3.55796E-06 | 0.005230632 |
| 1470.159972 | 166.292153 | 3.75298E-06 | 0.005517484 |
| 1470.199972 | 195.152316 | 4.40432E-06 | 0.006475225 |
| 1470.239972 | 223.228754 | 5.03796E-06 | 0.007407013 |
| 1470.279972 | 239.501051 | 5.40521E-06 | 0.007947165 |
| 1470.319972 | 234.011009 | 5.2813E-06  | 0.007765205 |
| 1470.359972 | 241.629564 | 5.45324E-06 | 0.00801823  |
| 1470.399972 | 251.542968 | 5.67697E-06 | 0.008347423 |
| 1470.439972 | 225.966613 | 5.09975E-06 | 0.007498879 |
| 1470.479972 | 194.541331 | 4.39053E-06 | 0.006456182 |
| 1470.519972 | 179.777262 | 4.05732E-06 | 0.005966374 |
| 1470.559972 | 185.35001  | 4.18309E-06 | 0.006151487 |
| 1470.599972 | 176.591826 | 3.98543E-06 | 0.005860976 |
| 1470.639972 | 180.485778 | 4.07331E-06 | 0.005990376 |
| 1470.679972 | 188.614634 | 4.25677E-06 | 0.006260346 |
| 1470.719972 | 194.432938 | 4.38808E-06 | 0.006453638 |
| 1470.759972 | 195.579672 | 4.41396E-06 | 0.006491877 |
| 1470.799972 | 210.336331 | 4.747E-06   | 0.006981885 |
| 1470.839972 | 234.881515 | 5.30095E-06 | 0.007796847 |
| 1470.879972 | 228.837836 | 5.16455E-06 | 0.007596435 |
| 1470.919972 | 205.711651 | 4.64263E-06 | 0.00682893  |
| 1470.959972 | 180.880876 | 4.08223E-06 | 0.006004796 |
| 1470.999972 | 157.181961 | 3.54738E-06 | 0.005218193 |
| 1471.039972 | 156.198418 | 3.52518E-06 | 0.005185682 |
| 1471.079972 | 165.293319 | 3.73044E-06 | 0.005487776 |
| 1471.119972 | 178.668439 | 4.0323E-06  | 0.005931994 |

|             |            |             |             |
|-------------|------------|-------------|-------------|
| 1471.159972 | 189.758921 | 4.28259E-06 | 0.006300382 |
| 1471.199972 | 220.251121 | 4.97076E-06 | 0.007312983 |
| 1471.239972 | 236.062758 | 5.32761E-06 | 0.007838189 |
| 1471.279972 | 237.91211  | 5.36934E-06 | 0.00789981  |
| 1471.319972 | 240.291916 | 5.42305E-06 | 0.007979047 |
| 1471.359972 | 219.440784 | 4.95247E-06 | 0.00728687  |
| 1471.399972 | 186.385932 | 4.20647E-06 | 0.006189401 |
| 1471.439972 | 171.780737 | 3.87685E-06 | 0.005704555 |
| 1471.479972 | 168.703664 | 3.80741E-06 | 0.005602523 |
| 1471.519972 | 186.588358 | 4.21104E-06 | 0.006196628 |
| 1471.559972 | 190.224575 | 4.2931E-06  | 0.00631756  |
| 1471.599972 | 173.92811  | 3.92532E-06 | 0.005776494 |
| 1471.639972 | 189.037189 | 4.26631E-06 | 0.006278467 |
| 1471.679972 | 189.109068 | 4.26793E-06 | 0.006281025 |
| 1471.719972 | 180.118883 | 4.06503E-06 | 0.005982589 |
| 1471.759972 | 178.643379 | 4.03173E-06 | 0.005933742 |
| 1471.799972 | 172.816674 | 3.90023E-06 | 0.005740361 |
| 1471.839972 | 175.43682  | 3.95936E-06 | 0.005827551 |
| 1471.879972 | 185.904683 | 4.19561E-06 | 0.006175434 |
| 1471.919972 | 189.497883 | 4.2767E-06  | 0.006294965 |
| 1471.959972 | 175.257845 | 3.95533E-06 | 0.005822081 |
| 1471.999972 | 162.549971 | 3.66853E-06 | 0.005400071 |
| 1472.039972 | 160.841918 | 3.62998E-06 | 0.005343473 |
| 1472.079972 | 173.933502 | 3.92544E-06 | 0.005778557 |
| 1472.119972 | 181.464913 | 4.09541E-06 | 0.006028935 |
| 1472.159972 | 196.128235 | 4.42634E-06 | 0.006516282 |
| 1472.199972 | 214.4278   | 4.83934E-06 | 0.007124471 |
| 1472.239972 | 214.00926  | 4.82989E-06 | 0.007110758 |
| 1472.279972 | 202.367    | 4.56714E-06 | 0.006724111 |
| 1472.319972 | 191.077675 | 4.31236E-06 | 0.006349169 |
| 1472.359972 | 186.961506 | 4.21946E-06 | 0.006212565 |
| 1472.399972 | 195.577663 | 4.41392E-06 | 0.006499049 |
| 1472.439972 | 210.642363 | 4.7539E-06  | 0.006999839 |
| 1472.479972 | 214.190738 | 4.83399E-06 | 0.007117948 |
| 1472.519972 | 198.945353 | 4.48992E-06 | 0.006611496 |
| 1472.559972 | 181.617021 | 4.09884E-06 | 0.006035792 |
| 1472.599972 | 159.962739 | 3.61014E-06 | 0.005316286 |
| 1472.639972 | 145.786344 | 3.29019E-06 | 0.004845272 |
| 1472.679972 | 152.161203 | 3.43407E-06 | 0.005057281 |
| 1472.719972 | 176.217051 | 3.97697E-06 | 0.005856968 |
| 1472.759972 | 188.33328  | 4.25042E-06 | 0.006259848 |
| 1472.799972 | 192.341194 | 4.34087E-06 | 0.006393237 |
| 1472.839972 | 181.860934 | 4.10435E-06 | 0.006045048 |
| 1472.879972 | 172.217448 | 3.88671E-06 | 0.005724654 |
| 1472.919972 | 177.890626 | 4.01474E-06 | 0.005913396 |
| 1472.959972 | 185.056585 | 4.17647E-06 | 0.006151772 |



|             |            |             |             |
|-------------|------------|-------------|-------------|
| 1472.999972 | 200.101356 | 4.51601E-06 | 0.006652081 |
| 1473.039972 | 222.975472 | 5.03225E-06 | 0.007412699 |
| 1473.079972 | 217.399188 | 4.9064E-06  | 0.007227515 |
| 1473.119972 | 215.216265 | 4.85713E-06 | 0.007155137 |
| 1473.159972 | 219.609917 | 4.95629E-06 | 0.007301408 |
| 1473.199972 | 223.161559 | 5.03645E-06 | 0.007419691 |
| 1473.239972 | 229.14266  | 5.17143E-06 | 0.007618758 |
| 1473.279972 | 238.700281 | 5.38713E-06 | 0.007936755 |
| 1473.319972 | 239.857706 | 5.41325E-06 | 0.007975456 |
| 1473.359972 | 249.979441 | 5.64169E-06 | 0.008312237 |
| 1473.399972 | 262.426559 | 5.9226E-06  | 0.008726361 |
| 1473.439972 | 242.111201 | 5.46411E-06 | 0.008051042 |
| 1473.479972 | 209.340481 | 4.72452E-06 | 0.00696149  |
| 1473.519972 | 192.677561 | 4.34846E-06 | 0.006407549 |
| 1473.559972 | 187.714092 | 4.23645E-06 | 0.006242657 |
| 1473.599972 | 179.266278 | 4.04579E-06 | 0.005961876 |
| 1473.639972 | 173.267477 | 3.91041E-06 | 0.00576253  |
| 1473.679972 | 165.116683 | 3.72645E-06 | 0.0054916   |
| 1473.719972 | 156.086866 | 3.52266E-06 | 0.005191419 |
| 1473.759972 | 168.472995 | 3.8022E-06  | 0.005603531 |
| 1473.799972 | 179.914365 | 4.06042E-06 | 0.005984242 |
| 1473.839972 | 171.438648 | 3.86913E-06 | 0.005702481 |
| 1473.879972 | 160.555628 | 3.62352E-06 | 0.005340629 |
| 1473.919972 | 144.704797 | 3.26579E-06 | 0.004813507 |
| 1473.959972 | 140.82433  | 3.17821E-06 | 0.004684553 |
| 1473.999972 | 147.698412 | 3.33335E-06 | 0.004913354 |
| 1474.039972 | 151.426042 | 3.41747E-06 | 0.005037495 |
| 1474.079972 | 182.746176 | 4.12433E-06 | 0.006079587 |
| 1474.119972 | 189.986829 | 4.28774E-06 | 0.00632064  |
| 1474.159972 | 188.106445 | 4.2453E-06  | 0.006258252 |
| 1474.199972 | 192.429137 | 4.34286E-06 | 0.006402241 |
| 1474.239972 | 212.421353 | 4.79405E-06 | 0.007067586 |
| 1474.279972 | 202.550927 | 4.57129E-06 | 0.006739365 |
| 1474.319972 | 176.912179 | 3.99266E-06 | 0.005886461 |
| 1474.359972 | 167.671392 | 3.78411E-06 | 0.00557914  |
| 1474.399972 | 159.411747 | 3.5977E-06  | 0.00530445  |
| 1474.439972 | 163.328876 | 3.68611E-06 | 0.005434941 |
| 1474.479972 | 172.03721  | 3.88264E-06 | 0.005724875 |
| 1474.519972 | 160.82943  | 3.6297E-06  | 0.00535206  |
| 1474.559972 | 166.544652 | 3.75868E-06 | 0.0055424   |
| 1474.599972 | 181.51823  | 4.09661E-06 | 0.006040866 |
| 1474.639972 | 193.904697 | 4.37616E-06 | 0.006453259 |
| 1474.679972 | 212.220403 | 4.78952E-06 | 0.007063008 |
| 1474.719972 | 204.036408 | 4.60482E-06 | 0.006790816 |
| 1474.759972 | 195.314169 | 4.40797E-06 | 0.006500696 |
| 1474.799972 | 180.643275 | 4.07687E-06 | 0.006012563 |

|             |            |             |             |
|-------------|------------|-------------|-------------|
| 1474.839972 | 156.001305 | 3.52073E-06 | 0.005192517 |
| 1474.879972 | 155.86039  | 3.51755E-06 | 0.005187967 |
| 1474.919972 | 172.722316 | 3.8981E-06  | 0.005749389 |
| 1474.959972 | 195.478166 | 4.41167E-06 | 0.006507037 |
| 1474.999972 | 216.81374  | 4.89318E-06 | 0.007217446 |
| 1475.039972 | 221.613826 | 5.00152E-06 | 0.007377435 |
| 1475.079971 | 224.600539 | 5.06892E-06 | 0.007477064 |
| 1475.119971 | 210.330622 | 4.74687E-06 | 0.007002202 |
| 1475.159971 | 199.316343 | 4.49829E-06 | 0.006635701 |
| 1475.199971 | 207.090594 | 4.67375E-06 | 0.00689471  |
| 1475.239971 | 209.228983 | 4.72201E-06 | 0.006966093 |
| 1475.279971 | 235.641979 | 5.31811E-06 | 0.007845703 |
| 1475.319971 | 279.885362 | 6.31662E-06 | 0.00931904  |
| 1475.359971 | 257.635321 | 5.81447E-06 | 0.008578437 |
| 1475.399971 | 233.781291 | 5.27612E-06 | 0.007784385 |
| 1475.439971 | 205.083879 | 4.62846E-06 | 0.006829011 |
| 1475.479971 | 182.025795 | 4.10807E-06 | 0.006061373 |
| 1475.519971 | 181.687432 | 4.10043E-06 | 0.00605027  |
| 1475.559971 | 175.807734 | 3.96774E-06 | 0.005854632 |
| 1475.599971 | 171.501248 | 3.87054E-06 | 0.005711375 |
| 1475.639971 | 169.726921 | 3.8305E-06  | 0.005652439 |
| 1475.679971 | 182.435841 | 4.11732E-06 | 0.006075851 |
| 1475.719971 | 175.986058 | 3.97176E-06 | 0.005861206 |
| 1475.759971 | 190.602726 | 4.30164E-06 | 0.006348185 |
| 1475.799971 | 226.936508 | 5.12164E-06 | 0.007558517 |
| 1475.839971 | 211.83216  | 4.78076E-06 | 0.007055632 |
| 1475.879971 | 177.991164 | 4.01701E-06 | 0.005928629 |
| 1475.919971 | 161.322723 | 3.64083E-06 | 0.005373572 |
| 1475.959971 | 159.128926 | 3.59132E-06 | 0.005300642 |
| 1475.999971 | 164.23782  | 3.70662E-06 | 0.005470969 |
| 1476.039971 | 173.460269 | 3.91476E-06 | 0.005778337 |
| 1476.079971 | 184.899698 | 4.17293E-06 | 0.006159576 |
| 1476.119971 | 192.945836 | 4.35452E-06 | 0.006427792 |
| 1476.159971 | 198.327473 | 4.47597E-06 | 0.006607255 |
| 1476.199971 | 219.066344 | 4.94402E-06 | 0.007298366 |
| 1476.239971 | 220.873664 | 4.98481E-06 | 0.007358777 |
| 1476.279971 | 216.044438 | 4.87582E-06 | 0.007198078 |
| 1476.319971 | 222.76571  | 5.02751E-06 | 0.007422216 |
| 1476.359971 | 226.599715 | 5.11404E-06 | 0.007550164 |
| 1476.399971 | 231.709265 | 5.22936E-06 | 0.00772062  |
| 1476.439971 | 232.980431 | 5.25804E-06 | 0.007763186 |
| 1476.479971 | 212.416789 | 4.79395E-06 | 0.007078173 |
| 1476.519971 | 192.010141 | 4.3334E-06  | 0.006398354 |
| 1476.559971 | 172.481396 | 3.89266E-06 | 0.005747753 |
| 1476.599971 | 170.083451 | 3.83855E-06 | 0.005667998 |
| 1476.639971 | 185.025684 | 4.17577E-06 | 0.006166112 |

|             |            |             |             |
|-------------|------------|-------------|-------------|
| 1476.679971 | 187.660782 | 4.23524E-06 | 0.006254098 |
| 1476.719971 | 208.134879 | 4.69731E-06 | 0.006936618 |
| 1476.759971 | 245.235382 | 5.53462E-06 | 0.008173307 |
| 1476.799971 | 275.465176 | 6.21687E-06 | 0.009181067 |
| 1476.839971 | 280.86657  | 6.33877E-06 | 0.009361345 |
| 1476.879971 | 265.608653 | 5.99442E-06 | 0.008853035 |
| 1476.919971 | 287.879596 | 6.49704E-06 | 0.00959561  |
| 1476.959971 | 334.229322 | 7.54309E-06 | 0.011140842 |
| 1476.999971 | 373.729016 | 8.43454E-06 | 0.01245782  |
| 1477.039971 | 399.944308 | 9.02619E-06 | 0.013332037 |
| 1477.079971 | 428.75116  | 9.67632E-06 | 0.014292693 |
| 1477.119971 | 467.797978 | 1.05575E-05 | 0.015594766 |
| 1477.159971 | 548.397446 | 1.23766E-05 | 0.018282169 |
| 1477.199971 | 625.024174 | 1.41059E-05 | 0.020837272 |
| 1477.239971 | 704.125702 | 1.58911E-05 | 0.023475022 |
| 1477.279971 | 795.117284 | 1.79447E-05 | 0.026509331 |
| 1477.319971 | 892.726146 | 2.01476E-05 | 0.029764431 |
| 1477.359971 | 924.017717 | 2.08538E-05 | 0.030808559 |
| 1477.399971 | 889.259045 | 2.00693E-05 | 0.029650439 |
| 1477.439971 | 828.521494 | 1.86986E-05 | 0.027626024 |
| 1477.479971 | 701.804375 | 1.58387E-05 | 0.023401432 |
| 1477.519971 | 513.177227 | 1.15817E-05 | 0.017112186 |
| 1477.559971 | 371.402235 | 8.38203E-06 | 0.012384954 |
| 1477.599971 | 290.460879 | 6.5553E-06  | 0.009686107 |
| 1477.639971 | 234.832379 | 5.29984E-06 | 0.007831255 |
| 1477.679971 | 202.231169 | 4.56408E-06 | 0.006744243 |
| 1477.719971 | 207.847497 | 4.69083E-06 | 0.006931731 |
| 1477.759971 | 226.11756  | 5.10316E-06 | 0.007541243 |
| 1477.799971 | 212.968355 | 4.8064E-06  | 0.007102896 |
| 1477.839971 | 212.667695 | 4.79961E-06 | 0.007093061 |
| 1477.879971 | 216.781223 | 4.89245E-06 | 0.007230454 |
| 1477.919971 | 242.602498 | 5.4752E-06  | 0.008091908 |
| 1477.959971 | 255.736132 | 5.77161E-06 | 0.008530206 |
| 1477.999971 | 264.759889 | 5.97526E-06 | 0.008831437 |
| 1478.039971 | 280.41852  | 6.32866E-06 | 0.009354006 |
| 1478.079971 | 293.14534  | 6.61588E-06 | 0.009778803 |
| 1478.119971 | 312.356771 | 7.04946E-06 | 0.010419944 |
| 1478.159971 | 362.162567 | 8.1735E-06  | 0.012081747 |
| 1478.199971 | 416.571713 | 9.40144E-06 | 0.013897213 |
| 1478.239971 | 508.72107  | 1.14811E-05 | 0.016971859 |
| 1478.279971 | 556.82744  | 1.25668E-05 | 0.018577278 |
| 1478.319971 | 589.271212 | 1.3299E-05  | 0.019660222 |
| 1478.359971 | 637.556431 | 1.43888E-05 | 0.021271768 |
| 1478.399971 | 632.562704 | 1.42761E-05 | 0.021105725 |
| 1478.439971 | 547.636918 | 1.23594E-05 | 0.018272635 |
| 1478.479971 | 458.326746 | 1.03438E-05 | 0.015293096 |

|             |            |             |             |
|-------------|------------|-------------|-------------|
| 1478.519971 | 359.11922  | 8.10482E-06 | 0.011983139 |
| 1478.559971 | 292.851487 | 6.60925E-06 | 0.009772173 |
| 1478.599971 | 244.581662 | 5.51987E-06 | 0.008161676 |
| 1478.639971 | 203.789509 | 4.59925E-06 | 0.006800628 |
| 1478.679971 | 195.025243 | 4.40145E-06 | 0.006508333 |
| 1478.719971 | 179.234928 | 4.04508E-06 | 0.005981545 |
| 1478.759971 | 161.353922 | 3.64153E-06 | 0.005384954 |
| 1478.799971 | 169.070552 | 3.81569E-06 | 0.005642638 |
| 1478.839971 | 173.508123 | 3.91584E-06 | 0.005790896 |
| 1478.879971 | 177.063631 | 3.99608E-06 | 0.005909722 |
| 1478.919971 | 173.981388 | 3.92652E-06 | 0.005807005 |
| 1478.959971 | 187.325543 | 4.22768E-06 | 0.006252564 |
| 1478.999971 | 228.307406 | 5.15258E-06 | 0.007620666 |
| 1479.039971 | 236.857255 | 5.34554E-06 | 0.007906265 |
| 1479.079971 | 231.911042 | 5.23391E-06 | 0.00774137  |
| 1479.119971 | 248.791872 | 5.61489E-06 | 0.00830509  |
| 1479.159971 | 277.523608 | 6.26332E-06 | 0.009264454 |
| 1479.199971 | 313.630376 | 7.0782E-06  | 0.010470074 |
| 1479.239971 | 338.441797 | 7.63816E-06 | 0.011298671 |
| 1479.279971 | 340.042199 | 7.67428E-06 | 0.011352407 |
| 1479.319971 | 336.720091 | 7.5993E-06  | 0.011241801 |
| 1479.359971 | 353.793311 | 7.98462E-06 | 0.011812131 |
| 1479.399971 | 367.817897 | 8.30114E-06 | 0.012280703 |
| 1479.439971 | 355.512908 | 8.02343E-06 | 0.011870185 |
| 1479.479971 | 308.994284 | 6.97357E-06 | 0.010317258 |
| 1479.519971 | 235.283598 | 5.31002E-06 | 0.007856285 |
| 1479.559971 | 185.74868  | 4.19209E-06 | 0.006202447 |
| 1479.599971 | 167.356752 | 3.77701E-06 | 0.005588462 |
| 1479.639971 | 158.714369 | 3.58196E-06 | 0.005300015 |
| 1479.679971 | 170.718727 | 3.85288E-06 | 0.005701035 |
| 1479.719971 | 174.083163 | 3.92881E-06 | 0.005813545 |
| 1479.759971 | 171.899549 | 3.87953E-06 | 0.005740778 |
| 1479.799971 | 180.50011  | 4.07364E-06 | 0.006028167 |
| 1479.839971 | 192.452443 | 4.34338E-06 | 0.006427513 |
| 1479.879971 | 194.954855 | 4.39986E-06 | 0.006511264 |
| 1479.919971 | 188.122551 | 4.24566E-06 | 0.006283243 |
| 1479.959971 | 167.264016 | 3.77492E-06 | 0.005586724 |
| 1479.999971 | 166.68455  | 3.76184E-06 | 0.00556752  |
| 1480.039971 | 180.334517 | 4.0699E-06  | 0.006023613 |
| 1480.079971 | 201.360399 | 4.54442E-06 | 0.006726111 |
| 1480.119971 | 219.24381  | 4.94803E-06 | 0.007323674 |
| 1480.159971 | 224.024974 | 5.05593E-06 | 0.007483588 |
| 1480.199971 | 250.115884 | 5.64477E-06 | 0.008355384 |
| 1480.239971 | 271.770133 | 6.13347E-06 | 0.009079012 |
| 1480.279971 | 268.15273  | 6.05183E-06 | 0.008958408 |
| 1480.319971 | 261.448519 | 5.90053E-06 | 0.008734671 |

|             |            |             |             |
|-------------|------------|-------------|-------------|
| 1480.359971 | 260.449739 | 5.87799E-06 | 0.008701538 |
| 1480.399971 | 255.765248 | 5.77227E-06 | 0.008545262 |
| 1480.439971 | 255.924036 | 5.77585E-06 | 0.008550798 |
| 1480.479971 | 225.348218 | 5.0858E-06  | 0.007529418 |
| 1480.519971 | 186.044081 | 4.19876E-06 | 0.006216342 |
| 1480.559971 | 173.172818 | 3.90827E-06 | 0.005786427 |
| 1480.599971 | 177.103127 | 3.99697E-06 | 0.005917915 |
| 1480.639971 | 171.042844 | 3.8602E-06  | 0.005715565 |
| 1480.679971 | 161.736342 | 3.65016E-06 | 0.005404725 |
| 1480.719971 | 165.837516 | 3.74272E-06 | 0.005541923 |
| 1480.759971 | 173.612062 | 3.91818E-06 | 0.005801888 |
| 1480.799971 | 174.645689 | 3.94151E-06 | 0.005836588 |
| 1480.839971 | 189.686328 | 4.28096E-06 | 0.006339411 |
| 1480.879971 | 198.585513 | 4.4818E-06  | 0.006637006 |
| 1480.919971 | 188.127949 | 4.24579E-06 | 0.006287669 |
| 1480.959971 | 183.214768 | 4.1349E-06  | 0.006123625 |
| 1480.999971 | 166.293987 | 3.75302E-06 | 0.005558228 |
| 1481.039971 | 156.510898 | 3.53223E-06 | 0.005231378 |
| 1481.079971 | 168.494507 | 3.80269E-06 | 0.005632083 |
| 1481.119971 | 210.609367 | 4.75316E-06 | 0.00704     |
| 1481.159971 | 236.31088  | 5.33321E-06 | 0.007899333 |
| 1481.199971 | 233.75771  | 5.27559E-06 | 0.007814198 |
| 1481.239971 | 253.066649 | 5.71136E-06 | 0.008459897 |
| 1481.279971 | 272.98171  | 6.16082E-06 | 0.009125895 |
| 1481.319971 | 255.796393 | 5.77297E-06 | 0.008551613 |
| 1481.359971 | 217.929315 | 4.91836E-06 | 0.007285863 |
| 1481.399971 | 219.160178 | 4.94614E-06 | 0.007327212 |
| 1481.439971 | 187.442612 | 4.23032E-06 | 0.006266963 |
| 1481.479971 | 155.84045  | 3.5171E-06  | 0.005210516 |
| 1481.519971 | 148.072201 | 3.34178E-06 | 0.004950919 |
| 1481.559971 | 158.768865 | 3.58319E-06 | 0.005308714 |
| 1481.599971 | 160.906861 | 3.63144E-06 | 0.005380347 |
| 1481.639971 | 153.648687 | 3.46764E-06 | 0.005137789 |
| 1481.679971 | 171.678234 | 3.87454E-06 | 0.005740826 |
| 1481.719971 | 192.629823 | 4.34739E-06 | 0.00644161  |
| 1481.759971 | 177.107113 | 3.99706E-06 | 0.005922685 |
| 1481.799971 | 158.470758 | 3.57646E-06 | 0.005299605 |
| 1481.839971 | 157.91054  | 3.56382E-06 | 0.005281012 |
| 1481.879971 | 169.061194 | 3.81548E-06 | 0.005654077 |
| 1481.919971 | 171.217515 | 3.86414E-06 | 0.005726347 |
| 1481.959971 | 173.045126 | 3.90539E-06 | 0.005787628 |
| 1481.999971 | 192.192717 | 4.33752E-06 | 0.006428207 |
| 1482.039971 | 195.921308 | 4.42167E-06 | 0.006553093 |
| 1482.079971 | 168.067146 | 3.79304E-06 | 0.005621591 |
| 1482.119971 | 167.761686 | 3.78615E-06 | 0.005611525 |
| 1482.159971 | 179.448561 | 4.0499E-06  | 0.006002606 |

|             |            |             |             |
|-------------|------------|-------------|-------------|
| 1482.199971 | 195.790074 | 4.41871E-06 | 0.006549411 |
| 1482.239971 | 197.036975 | 4.44685E-06 | 0.006591299 |
| 1482.279971 | 190.839141 | 4.30697E-06 | 0.006384141 |
| 1482.319971 | 203.62026  | 4.59543E-06 | 0.006811891 |
| 1482.359971 | 195.4005   | 4.40992E-06 | 0.006537085 |
| 1482.399971 | 181.595912 | 4.09837E-06 | 0.006075419 |
| 1482.439971 | 182.801731 | 4.12558E-06 | 0.006115925 |
| 1482.479971 | 180.116515 | 4.06498E-06 | 0.00602625  |
| 1482.519971 | 172.217037 | 3.8867E-06  | 0.005762108 |
| 1482.559971 | 183.792965 | 4.14795E-06 | 0.006149586 |
| 1482.599971 | 186.246543 | 4.20333E-06 | 0.00623185  |
| 1482.639971 | 179.486519 | 4.05076E-06 | 0.00600582  |
| 1482.679971 | 166.786677 | 3.76414E-06 | 0.005581019 |
| 1482.719971 | 157.191027 | 3.54758E-06 | 0.005260071 |
| 1482.759971 | 181.081078 | 4.08675E-06 | 0.006059666 |
| 1482.799971 | 189.012354 | 4.26575E-06 | 0.006325247 |
| 1482.839971 | 204.392853 | 4.61286E-06 | 0.006840136 |
| 1482.879971 | 222.925217 | 5.03111E-06 | 0.007460535 |
| 1482.919971 | 203.482975 | 4.59233E-06 | 0.006810054 |
| 1482.959971 | 193.401081 | 4.36479E-06 | 0.006472813 |
| 1482.999971 | 200.055447 | 4.51497E-06 | 0.006695705 |
| 1483.039971 | 192.741456 | 4.34991E-06 | 0.006451085 |
| 1483.079971 | 178.194184 | 4.02159E-06 | 0.005964346 |
| 1483.119971 | 179.062414 | 4.04119E-06 | 0.005993569 |
| 1483.159971 | 193.588445 | 4.36902E-06 | 0.006479958 |
| 1483.199971 | 190.861065 | 4.30747E-06 | 0.006388837 |
| 1483.239971 | 198.876454 | 4.48836E-06 | 0.006657322 |
| 1483.279971 | 218.234218 | 4.92524E-06 | 0.007305513 |
| 1483.319971 | 217.557428 | 4.90997E-06 | 0.007283054 |
| 1483.359971 | 211.81027  | 4.78026E-06 | 0.00709085  |
| 1483.399971 | 203.227925 | 4.58657E-06 | 0.00680372  |
| 1483.439971 | 173.340605 | 3.91206E-06 | 0.0058033   |
| 1483.479971 | 165.342322 | 3.73155E-06 | 0.005535674 |
| 1483.519971 | 162.285621 | 3.66256E-06 | 0.005433482 |
| 1483.559971 | 145.558471 | 3.28505E-06 | 0.004873572 |
| 1483.599971 | 123.128145 | 2.77883E-06 | 0.004122673 |
| 1483.639971 | 125.436427 | 2.83093E-06 | 0.004200074 |
| 1483.679971 | 144.315563 | 3.257E-06   | 0.004832348 |
| 1483.719971 | 164.272629 | 3.7074E-06  | 0.00550075  |
| 1483.759971 | 185.196463 | 4.17963E-06 | 0.006201562 |
| 1483.799971 | 196.564091 | 4.43618E-06 | 0.0065824   |
| 1483.839971 | 195.35719  | 4.40894E-06 | 0.006542161 |
| 1483.879971 | 188.969131 | 4.26477E-06 | 0.006328407 |
| 1483.919971 | 171.226566 | 3.86435E-06 | 0.005734379 |
| 1483.959971 | 163.03708  | 3.67952E-06 | 0.00546026  |
| 1483.999971 | 153.493005 | 3.46412E-06 | 0.005140759 |

|             |            |             |             |
|-------------|------------|-------------|-------------|
| 1484.039971 | 150.220027 | 3.39026E-06 | 0.005031277 |
| 1484.079971 | 155.36641  | 3.5064E-06  | 0.005203783 |
| 1484.119971 | 167.846224 | 3.78806E-06 | 0.005621929 |
| 1484.159971 | 192.093223 | 4.33528E-06 | 0.006434244 |
| 1484.199971 | 199.849091 | 4.51032E-06 | 0.00669421  |
| 1484.239971 | 177.495502 | 4.00583E-06 | 0.005945607 |
| 1484.279971 | 166.597424 | 3.75987E-06 | 0.005580702 |
| 1484.319971 | 203.708858 | 4.59743E-06 | 0.00682405  |
| 1484.359971 | 230.376559 | 5.19928E-06 | 0.0077176   |
| 1484.399971 | 215.572974 | 4.86518E-06 | 0.007221876 |
| 1484.439971 | 197.661793 | 4.46095E-06 | 0.006622014 |
| 1484.479971 | 188.142973 | 4.24612E-06 | 0.006303287 |
| 1484.519971 | 169.23822  | 3.81947E-06 | 0.005670081 |
| 1484.559971 | 157.99832  | 3.5658E-06  | 0.005293647 |
| 1484.599971 | 175.052012 | 3.95068E-06 | 0.00586518  |
| 1484.639971 | 180.068087 | 4.06389E-06 | 0.006033407 |
| 1484.679971 | 174.767337 | 3.94426E-06 | 0.005855957 |
| 1484.719971 | 182.013442 | 4.10779E-06 | 0.006098918 |
| 1484.759971 | 197.689236 | 4.46157E-06 | 0.006624362 |
| 1484.799971 | 201.407377 | 4.54548E-06 | 0.006749134 |
| 1484.839971 | 178.829903 | 4.03594E-06 | 0.005992728 |
| 1484.879971 | 152.328779 | 3.43785E-06 | 0.005104792 |
| 1484.919971 | 139.029856 | 3.13771E-06 | 0.004659249 |
| 1484.959971 | 152.915391 | 3.45109E-06 | 0.005124727 |
| 1484.999971 | 175.207969 | 3.9542E-06  | 0.005871987 |
| 1485.039971 | 196.38601  | 4.43216E-06 | 0.006581933 |
| 1485.079971 | 197.790024 | 4.46385E-06 | 0.006629167 |
| 1485.119971 | 231.104423 | 5.2157E-06  | 0.007745948 |
| 1485.159971 | 250.599538 | 5.65568E-06 | 0.008399593 |
| 1485.199971 | 219.053259 | 4.94373E-06 | 0.007342423 |
| 1485.239971 | 212.67214  | 4.79971E-06 | 0.007128727 |
| 1485.279971 | 229.066585 | 5.16971E-06 | 0.007678472 |
| 1485.319971 | 244.03171  | 5.50746E-06 | 0.008180334 |
| 1485.359971 | 207.028748 | 4.67235E-06 | 0.006940122 |
| 1485.399971 | 164.79873  | 3.71928E-06 | 0.005524615 |
| 1485.439971 | 167.551158 | 3.7814E-06  | 0.005617037 |
| 1485.479971 | 184.944959 | 4.17395E-06 | 0.006200319 |
| 1485.519971 | 191.744334 | 4.3274E-06  | 0.006428443 |
| 1485.559971 | 178.812969 | 4.03556E-06 | 0.005995066 |
| 1485.599971 | 158.938488 | 3.58702E-06 | 0.005328877 |
| 1485.639971 | 149.952422 | 3.38422E-06 | 0.005027728 |
| 1485.679971 | 152.642182 | 3.44492E-06 | 0.005118051 |
| 1485.719971 | 169.653962 | 3.82885E-06 | 0.005688604 |
| 1485.759971 | 180.418216 | 4.07179E-06 | 0.006049699 |
| 1485.799971 | 193.05083  | 4.35689E-06 | 0.006473465 |
| 1485.839971 | 202.483357 | 4.56977E-06 | 0.006789943 |

|             |            |             |             |
|-------------|------------|-------------|-------------|
| 1485.879971 | 185.373858 | 4.18363E-06 | 0.006216372 |
| 1485.919971 | 162.296082 | 3.6628E-06  | 0.005442622 |
| 1485.959971 | 159.075756 | 3.59012E-06 | 0.005334772 |
| 1485.999971 | 164.905243 | 3.72168E-06 | 0.005530419 |
| 1486.039971 | 179.581206 | 4.0529E-06  | 0.006022768 |
| 1486.079971 | 184.652757 | 4.16736E-06 | 0.006193024 |
| 1486.119971 | 181.570937 | 4.0978E-06  | 0.006089827 |
| 1486.159971 | 181.363998 | 4.09313E-06 | 0.00608305  |
| 1486.199971 | 181.225108 | 4.09E-06    | 0.006078555 |
| 1486.239971 | 180.125183 | 4.06517E-06 | 0.006041825 |
| 1486.279971 | 195.833921 | 4.4197E-06  | 0.00656891  |
| 1486.319971 | 215.345003 | 4.86004E-06 | 0.00722357  |
| 1486.359971 | 224.716925 | 5.07155E-06 | 0.007538146 |
| 1486.399971 | 205.889762 | 4.64665E-06 | 0.006906773 |
| 1486.439971 | 192.204944 | 4.3378E-06  | 0.006447876 |
| 1486.479971 | 180.481552 | 4.07322E-06 | 0.006054756 |
| 1486.519971 | 194.874033 | 4.39804E-06 | 0.006537768 |
| 1486.559971 | 208.488862 | 4.7053E-06  | 0.006994715 |
| 1486.599971 | 202.048325 | 4.55995E-06 | 0.00677882  |
| 1486.639971 | 178.48007  | 4.02805E-06 | 0.005988255 |
| 1486.679971 | 168.751402 | 3.80848E-06 | 0.005661997 |
| 1486.719971 | 170.818361 | 3.85513E-06 | 0.005731502 |
| 1486.759971 | 176.19782  | 3.97654E-06 | 0.00591216  |
| 1486.799971 | 170.596764 | 3.85013E-06 | 0.005724375 |
| 1486.839971 | 186.612675 | 4.21159E-06 | 0.006261958 |
| 1486.879971 | 199.409929 | 4.5004E-06  | 0.006691561 |
| 1486.919971 | 179.15983  | 4.04339E-06 | 0.006012194 |
| 1486.959971 | 143.732651 | 3.24385E-06 | 0.004823469 |
| 1486.999971 | 142.261654 | 3.21065E-06 | 0.004774233 |
| 1487.039971 | 182.283679 | 4.11389E-06 | 0.006117517 |
| 1487.079971 | 192.113091 | 4.33572E-06 | 0.00644757  |
| 1487.119971 | 160.34196  | 3.61869E-06 | 0.005381433 |
| 1487.159971 | 164.222517 | 3.70627E-06 | 0.005511822 |
| 1487.199971 | 195.527529 | 4.41278E-06 | 0.006562692 |
| 1487.239971 | 249.615447 | 5.63347E-06 | 0.008378326 |
| 1487.279971 | 283.62694  | 6.40106E-06 | 0.009520176 |
| 1487.319971 | 280.220778 | 6.32419E-06 | 0.009406098 |
| 1487.359971 | 264.939983 | 5.97933E-06 | 0.008893411 |
| 1487.399971 | 241.705789 | 5.45496E-06 | 0.008113712 |
| 1487.439971 | 230.223909 | 5.19583E-06 | 0.00772849  |
| 1487.479971 | 215.12375  | 4.85504E-06 | 0.00722178  |
| 1487.519971 | 208.51802  | 4.70596E-06 | 0.007000211 |
| 1487.559971 | 188.60137  | 4.25647E-06 | 0.006331755 |
| 1487.599971 | 159.556036 | 3.60096E-06 | 0.005356784 |
| 1487.639971 | 166.610915 | 3.76018E-06 | 0.005593789 |
| 1487.679971 | 185.854203 | 4.19447E-06 | 0.00624003  |



|             |            |             |             |
|-------------|------------|-------------|-------------|
| 1487.719971 | 183.396153 | 4.139E-06   | 0.006157667 |
| 1487.759971 | 180.407525 | 4.07155E-06 | 0.006057484 |
| 1487.799971 | 185.076541 | 4.17692E-06 | 0.006214421 |
| 1487.839971 | 200.888587 | 4.53378E-06 | 0.006745533 |
| 1487.879971 | 205.551774 | 4.63902E-06 | 0.006902301 |
| 1487.919971 | 195.875701 | 4.42064E-06 | 0.006577561 |
| 1487.959971 | 179.984182 | 4.06199E-06 | 0.006044082 |
| 1487.999971 | 176.14718  | 3.9754E-06  | 0.00591539  |
| 1488.039971 | 188.369655 | 4.25124E-06 | 0.006326016 |
| 1488.079971 | 207.075528 | 4.67341E-06 | 0.006954402 |
| 1488.119971 | 208.218785 | 4.69921E-06 | 0.006992985 |
| 1488.159971 | 199.719582 | 4.50739E-06 | 0.006707722 |
| 1488.199971 | 195.426566 | 4.41051E-06 | 0.006563714 |
| 1488.239971 | 215.716286 | 4.86842E-06 | 0.007245371 |
| 1488.279971 | 239.662664 | 5.40885E-06 | 0.008049887 |
| 1488.319971 | 228.542769 | 5.15789E-06 | 0.007676594 |
| 1488.359971 | 215.356834 | 4.8603E-06  | 0.007233882 |
| 1488.399971 | 210.788235 | 4.7572E-06  | 0.007080612 |
| 1488.439971 | 202.467239 | 4.5694E-06  | 0.006801283 |
| 1488.479971 | 190.331218 | 4.29551E-06 | 0.006393781 |
| 1488.519971 | 196.375255 | 4.43192E-06 | 0.006596995 |
| 1488.559971 | 194.307904 | 4.38526E-06 | 0.006527721 |
| 1488.599971 | 160.156384 | 3.61451E-06 | 0.005380554 |
| 1488.639971 | 143.713208 | 3.24341E-06 | 0.004828265 |
| 1488.679971 | 151.774975 | 3.42535E-06 | 0.00509925  |
| 1488.719971 | 182.270772 | 4.1136E-06  | 0.006123995 |
| 1488.759971 | 206.924713 | 4.67E-06    | 0.006952513 |
| 1488.799971 | 189.435923 | 4.2753E-06  | 0.006365074 |
| 1488.839971 | 187.490545 | 4.2314E-06  | 0.006299878 |
| 1488.879971 | 179.420513 | 4.04927E-06 | 0.006028879 |
| 1488.919971 | 177.82128  | 4.01318E-06 | 0.005975302 |
| 1488.959971 | 187.028287 | 4.22097E-06 | 0.006284852 |
| 1488.999971 | 188.579793 | 4.25598E-06 | 0.006337159 |
| 1489.039971 | 204.315389 | 4.61111E-06 | 0.006866133 |
| 1489.079971 | 204.259038 | 4.60984E-06 | 0.006864423 |
| 1489.119971 | 182.378271 | 4.11602E-06 | 0.006129253 |
| 1489.159971 | 210.330716 | 4.74687E-06 | 0.007068851 |
| 1489.199971 | 240.158105 | 5.42003E-06 | 0.008071514 |
| 1489.239971 | 223.06939  | 5.03437E-06 | 0.007497378 |
| 1489.279971 | 214.446294 | 4.83975E-06 | 0.007207749 |
| 1489.319971 | 224.172023 | 5.05925E-06 | 0.007534843 |
| 1489.359971 | 238.487486 | 5.38233E-06 | 0.008016227 |
| 1489.399971 | 225.852467 | 5.09718E-06 | 0.007591733 |
| 1489.439971 | 197.700243 | 4.46182E-06 | 0.006645612 |
| 1489.479971 | 184.133886 | 4.15565E-06 | 0.00618975  |
| 1489.519971 | 189.735297 | 4.28206E-06 | 0.006378216 |

|             |            |             |             |
|-------------|------------|-------------|-------------|
| 1489.559971 | 181.172515 | 4.08881E-06 | 0.00609053  |
| 1489.599971 | 170.044493 | 3.83767E-06 | 0.005716589 |
| 1489.639971 | 168.942574 | 3.8128E-06  | 0.005679697 |
| 1489.679971 | 157.204308 | 3.54788E-06 | 0.005285209 |
| 1489.719971 | 141.808079 | 3.20041E-06 | 0.004767716 |
| 1489.759971 | 159.182786 | 3.59253E-06 | 0.005352013 |
| 1489.799971 | 188.568714 | 4.25573E-06 | 0.006340191 |
| 1489.839971 | 214.596288 | 4.84314E-06 | 0.007215503 |
| 1489.879971 | 211.54573  | 4.77429E-06 | 0.007113123 |
| 1489.919971 | 175.580896 | 3.96262E-06 | 0.005903981 |
| 1489.959971 | 151.210086 | 3.4126E-06  | 0.005084639 |
| 1489.999971 | 144.207244 | 3.25456E-06 | 0.004849289 |
| 1490.039971 | 163.59556  | 3.69212E-06 | 0.005501412 |
| 1490.079971 | 179.589476 | 4.05308E-06 | 0.00603942  |
| 1490.119971 | 174.187807 | 3.93118E-06 | 0.005857924 |
| 1490.159971 | 180.395831 | 4.07128E-06 | 0.006066862 |
| 1490.199971 | 189.580479 | 4.27857E-06 | 0.006375921 |
| 1490.239971 | 213.598152 | 4.82061E-06 | 0.00718387  |
| 1490.279971 | 234.045386 | 5.28208E-06 | 0.007871776 |
| 1490.319971 | 263.415994 | 5.94493E-06 | 0.008859851 |
| 1490.359971 | 264.13796  | 5.96123E-06 | 0.008884372 |
| 1490.399971 | 232.846313 | 5.25502E-06 | 0.007832077 |
| 1490.439971 | 203.406562 | 4.5906E-06  | 0.006842018 |
| 1490.479971 | 201.240121 | 4.54171E-06 | 0.006769327 |
| 1490.519971 | 201.580184 | 4.54938E-06 | 0.006780948 |
| 1490.559971 | 184.960816 | 4.17431E-06 | 0.006222056 |
| 1490.599971 | 160.328246 | 3.61839E-06 | 0.005393565 |
| 1490.639971 | 139.100716 | 3.13931E-06 | 0.00467958  |
| 1490.679971 | 147.939353 | 3.33879E-06 | 0.00497706  |
| 1490.719971 | 170.695278 | 3.85235E-06 | 0.005742782 |
| 1490.759971 | 201.854061 | 4.55556E-06 | 0.006791254 |
| 1490.799971 | 208.27486  | 4.70047E-06 | 0.007007466 |
| 1490.839971 | 196.016894 | 4.42383E-06 | 0.00659522  |
| 1490.879971 | 188.503672 | 4.25427E-06 | 0.006342599 |
| 1490.919971 | 182.35788  | 4.11556E-06 | 0.006135976 |
| 1490.959971 | 163.792687 | 3.69657E-06 | 0.005511442 |
| 1490.999971 | 161.411334 | 3.64283E-06 | 0.005431458 |
| 1491.039971 | 182.345775 | 4.11529E-06 | 0.006136062 |
| 1491.079971 | 199.077348 | 4.4929E-06  | 0.006699271 |
| 1491.119971 | 192.0367   | 4.334E-06   | 0.006462515 |
| 1491.159971 | 178.732213 | 4.03374E-06 | 0.006014947 |
| 1491.199971 | 182.955839 | 4.12906E-06 | 0.006157252 |
| 1491.239971 | 206.816714 | 4.66757E-06 | 0.00696046  |
| 1491.279971 | 214.321721 | 4.83694E-06 | 0.007213236 |
| 1491.319971 | 228.648833 | 5.16029E-06 | 0.007695637 |
| 1491.359971 | 225.899692 | 5.09824E-06 | 0.007603313 |

|             |            |             |             |
|-------------|------------|-------------|-------------|
| 1491.399971 | 204.078323 | 4.60576E-06 | 0.006869036 |
| 1491.439971 | 194.326385 | 4.38568E-06 | 0.006540972 |
| 1491.479971 | 179.947119 | 4.06116E-06 | 0.006057133 |
| 1491.519971 | 173.82719  | 3.92304E-06 | 0.005851289 |
| 1491.559971 | 165.930878 | 3.74483E-06 | 0.005585637 |
| 1491.599971 | 166.645744 | 3.76096E-06 | 0.005609851 |
| 1491.639971 | 159.244563 | 3.59393E-06 | 0.005360847 |
| 1491.679971 | 148.699021 | 3.35593E-06 | 0.005005973 |
| 1491.719971 | 149.651821 | 3.37743E-06 | 0.005038184 |
| 1491.759971 | 156.806975 | 3.53892E-06 | 0.005279212 |
| 1491.799971 | 175.264968 | 3.95549E-06 | 0.005900794 |
| 1491.839971 | 167.371036 | 3.77733E-06 | 0.005635174 |
| 1491.879971 | 152.966059 | 3.45223E-06 | 0.005150314 |
| 1491.919971 | 160.678665 | 3.62629E-06 | 0.00541014  |
| 1491.959971 | 167.515708 | 3.7806E-06  | 0.005640498 |
| 1491.999971 | 166.753777 | 3.7634E-06  | 0.005614993 |
| 1492.039971 | 174.16585  | 3.93068E-06 | 0.005864733 |
| 1492.079971 | 195.887563 | 4.42091E-06 | 0.00659635  |
| 1492.119971 | 194.512312 | 4.38987E-06 | 0.006550216 |
| 1492.159971 | 187.78307  | 4.238E-06   | 0.006323777 |
| 1492.199971 | 192.573408 | 4.34611E-06 | 0.006485271 |
| 1492.239971 | 215.598962 | 4.86577E-06 | 0.007260894 |
| 1492.279971 | 223.569577 | 5.04565E-06 | 0.007529528 |
| 1492.319971 | 227.420778 | 5.13257E-06 | 0.007659437 |
| 1492.359971 | 217.416137 | 4.90678E-06 | 0.007322681 |
| 1492.399971 | 227.90378  | 5.14347E-06 | 0.007676116 |
| 1492.439971 | 232.709151 | 5.25192E-06 | 0.007838177 |
| 1492.479971 | 187.581913 | 4.23346E-06 | 0.006318358 |
| 1492.519971 | 146.328004 | 3.30242E-06 | 0.004928927 |
| 1492.559971 | 137.420395 | 3.10139E-06 | 0.004629006 |
| 1492.599971 | 153.532228 | 3.46501E-06 | 0.005171872 |
| 1492.639971 | 177.663069 | 4.00961E-06 | 0.005984901 |
| 1492.679971 | 170.202212 | 3.84123E-06 | 0.005733722 |
| 1492.719971 | 150.33786  | 3.39292E-06 | 0.005064674 |
| 1492.759971 | 154.525731 | 3.48743E-06 | 0.005205897 |
| 1492.799971 | 186.20148  | 4.20231E-06 | 0.006273205 |
| 1492.839971 | 202.434799 | 4.56867E-06 | 0.006820295 |
| 1492.879971 | 181.131444 | 4.08788E-06 | 0.006102721 |
| 1492.919971 | 166.59195  | 3.75975E-06 | 0.005613003 |
| 1492.959971 | 171.451276 | 3.86942E-06 | 0.005776884 |
| 1492.999971 | 180.530795 | 4.07433E-06 | 0.006082972 |
| 1493.039971 | 183.25174  | 4.13574E-06 | 0.00617482  |
| 1493.079971 | 193.441233 | 4.3657E-06  | 0.006518338 |
| 1493.119971 | 210.685503 | 4.75488E-06 | 0.007099604 |
| 1493.159971 | 200.408177 | 4.52293E-06 | 0.006753463 |
| 1493.199971 | 175.305676 | 3.9564E-06  | 0.005907704 |

|             |            |             |             |
|-------------|------------|-------------|-------------|
| 1493.239971 | 174.359274 | 3.93505E-06 | 0.005875968 |
| 1493.279971 | 192.992141 | 4.35556E-06 | 0.006504076 |
| 1493.319971 | 197.607996 | 4.45974E-06 | 0.006659815 |
| 1493.359971 | 190.034717 | 4.28882E-06 | 0.00640475  |
| 1493.399971 | 206.272771 | 4.65529E-06 | 0.006952209 |
| 1493.439971 | 213.92644  | 4.82802E-06 | 0.007210361 |
| 1493.479971 | 204.923525 | 4.62484E-06 | 0.006907104 |
| 1493.519971 | 187.782211 | 4.23798E-06 | 0.006329512 |
| 1493.559971 | 173.28196  | 3.91073E-06 | 0.005840913 |
| 1493.599971 | 158.673405 | 3.58104E-06 | 0.005348638 |
| 1493.639971 | 142.670405 | 3.21987E-06 | 0.00480933  |
| 1493.679971 | 151.263874 | 3.41381E-06 | 0.005099147 |
| 1493.719971 | 173.135686 | 3.90743E-06 | 0.005836608 |
| 1493.759971 | 186.649199 | 4.21241E-06 | 0.006292333 |
| 1493.799971 | 182.772988 | 4.12493E-06 | 0.006161823 |
| 1493.839971 | 173.330646 | 3.91183E-06 | 0.00584365  |
| 1493.879971 | 171.333582 | 3.86676E-06 | 0.005776476 |
| 1493.919971 | 159.871927 | 3.60809E-06 | 0.005390193 |
| 1493.959971 | 161.35572  | 3.64157E-06 | 0.005440366 |
| 1493.999971 | 176.336587 | 3.97967E-06 | 0.005945629 |
| 1494.039971 | 185.894854 | 4.19539E-06 | 0.006268077 |
| 1494.079971 | 186.09999  | 4.20002E-06 | 0.006275162 |
| 1494.119971 | 180.27055  | 4.06846E-06 | 0.00607876  |
| 1494.159971 | 195.540786 | 4.41308E-06 | 0.006593852 |
| 1494.199971 | 207.447749 | 4.68181E-06 | 0.006995556 |
| 1494.239971 | 218.665901 | 4.93498E-06 | 0.007374052 |
| 1494.279971 | 225.987801 | 5.10023E-06 | 0.007621171 |
| 1494.319971 | 223.5004   | 5.04409E-06 | 0.007537488 |
| 1494.359971 | 230.276033 | 5.19701E-06 | 0.007766203 |
| 1494.399971 | 241.037257 | 5.43988E-06 | 0.008129349 |
| 1494.439971 | 237.345984 | 5.35657E-06 | 0.00800507  |
| 1494.479971 | 212.379194 | 4.7931E-06  | 0.007163196 |
| 1494.519971 | 191.902491 | 4.33097E-06 | 0.006472724 |
| 1494.559971 | 173.406159 | 3.91354E-06 | 0.005849013 |
| 1494.599971 | 172.971338 | 3.90372E-06 | 0.005834503 |
| 1494.639971 | 172.4426   | 3.89179E-06 | 0.005816824 |
| 1494.679971 | 178.84278  | 4.03623E-06 | 0.006032876 |
| 1494.719971 | 193.278758 | 4.36203E-06 | 0.006520017 |
| 1494.759971 | 205.170832 | 4.63042E-06 | 0.006921366 |
| 1494.799971 | 204.719906 | 4.62024E-06 | 0.006906339 |
| 1494.839971 | 201.254298 | 4.54203E-06 | 0.006789607 |
| 1494.879971 | 199.206831 | 4.49582E-06 | 0.006720712 |
| 1494.919971 | 194.719789 | 4.39455E-06 | 0.006569507 |
| 1494.959971 | 185.791475 | 4.19305E-06 | 0.006268449 |
| 1494.999971 | 183.250237 | 4.1357E-06  | 0.006182875 |
| 1495.039971 | 186.816742 | 4.21619E-06 | 0.006303378 |

|             |            |             |             |
|-------------|------------|-------------|-------------|
| 1495.079971 | 205.849243 | 4.64573E-06 | 0.006945739 |
| 1495.119971 | 209.737501 | 4.73348E-06 | 0.007077125 |
| 1495.159971 | 215.89342  | 4.87241E-06 | 0.007285038 |
| 1495.199971 | 208.167641 | 4.69805E-06 | 0.00702453  |
| 1495.239971 | 211.344225 | 4.76974E-06 | 0.007131913 |
| 1495.279971 | 219.644951 | 4.95708E-06 | 0.007412223 |
| 1495.319971 | 232.945026 | 5.25724E-06 | 0.007861263 |
| 1495.359971 | 232.983886 | 5.25812E-06 | 0.007862785 |
| 1495.399971 | 229.915395 | 5.18887E-06 | 0.007759436 |
| 1495.439971 | 215.359314 | 4.86036E-06 | 0.007268376 |
| 1495.479971 | 193.525399 | 4.3676E-06  | 0.006531656 |
| 1495.519971 | 165.319878 | 3.73104E-06 | 0.005579844 |
| 1495.559971 | 155.583776 | 3.51131E-06 | 0.005251373 |
| 1495.599971 | 156.560909 | 3.53336E-06 | 0.005284496 |
| 1495.639971 | 173.192872 | 3.90872E-06 | 0.005846041 |
| 1495.679971 | 185.695726 | 4.19089E-06 | 0.006268236 |
| 1495.719971 | 176.136358 | 3.97515E-06 | 0.005945715 |
| 1495.759971 | 175.387593 | 3.95825E-06 | 0.005920597 |
| 1495.799971 | 186.375158 | 4.20623E-06 | 0.006291675 |
| 1495.839971 | 186.426897 | 4.2074E-06  | 0.00629359  |
| 1495.879971 | 183.762474 | 4.14726E-06 | 0.006203808 |
| 1495.919971 | 179.83894  | 4.05871E-06 | 0.006071512 |
| 1495.959971 | 173.575333 | 3.91735E-06 | 0.005860204 |
| 1495.999971 | 176.937985 | 3.99324E-06 | 0.005973893 |
| 1496.039971 | 165.922756 | 3.74465E-06 | 0.005602139 |
| 1496.079971 | 179.162137 | 4.04344E-06 | 0.006049309 |
| 1496.119971 | 200.044572 | 4.51473E-06 | 0.006754574 |
| 1496.159971 | 205.43476  | 4.63638E-06 | 0.006936761 |
| 1496.199971 | 182.725958 | 4.12387E-06 | 0.006170135 |
| 1496.239971 | 196.013706 | 4.42376E-06 | 0.006619001 |
| 1496.279971 | 206.10454  | 4.65149E-06 | 0.006959935 |
| 1496.319971 | 191.727762 | 4.32703E-06 | 0.006474619 |
| 1496.359971 | 205.528843 | 4.6385E-06  | 0.006940865 |
| 1496.399971 | 211.972044 | 4.78391E-06 | 0.007158648 |
| 1496.439971 | 203.599289 | 4.59495E-06 | 0.00687607  |
| 1496.479971 | 182.938885 | 4.12868E-06 | 0.006178481 |
| 1496.519971 | 166.549107 | 3.75878E-06 | 0.005625091 |
| 1496.559971 | 151.462534 | 3.4183E-06  | 0.005115689 |
| 1496.599971 | 150.035735 | 3.3861E-06  | 0.005067634 |
| 1496.639971 | 146.573923 | 3.30797E-06 | 0.004950839 |
| 1496.679971 | 143.166064 | 3.23106E-06 | 0.004835861 |
| 1496.719971 | 161.379582 | 3.64211E-06 | 0.005451222 |
| 1496.759971 | 197.969317 | 4.46789E-06 | 0.006687362 |
| 1496.799971 | 230.74648  | 5.20763E-06 | 0.007794775 |
| 1496.839971 | 248.011434 | 5.59727E-06 | 0.008378221 |
| 1496.879971 | 242.564618 | 5.47435E-06 | 0.008194438 |

|             |            |             |             |
|-------------|------------|-------------|-------------|
| 1496.919971 | 210.939928 | 4.76062E-06 | 0.007126268 |
| 1496.959971 | 185.403527 | 4.1843E-06  | 0.006263729 |
| 1496.999971 | 178.345111 | 4.025E-06   | 0.006025426 |
| 1497.039971 | 178.546494 | 4.02955E-06 | 0.006032391 |
| 1497.079971 | 189.575403 | 4.27845E-06 | 0.006405186 |
| 1497.119971 | 199.109894 | 4.49363E-06 | 0.006727508 |
| 1497.159971 | 209.033962 | 4.71761E-06 | 0.00706301  |
| 1497.199971 | 214.076909 | 4.83142E-06 | 0.007233598 |
| 1497.239971 | 211.303146 | 4.76882E-06 | 0.007140064 |
| 1497.279971 | 197.799394 | 4.46406E-06 | 0.006683943 |
| 1497.319971 | 180.523759 | 4.07417E-06 | 0.006100336 |
| 1497.359971 | 180.958002 | 4.08397E-06 | 0.006115173 |
| 1497.399971 | 184.919964 | 4.17339E-06 | 0.006249228 |
| 1497.439971 | 201.802484 | 4.5544E-06  | 0.006819942 |
| 1497.479971 | 215.014523 | 4.85258E-06 | 0.007266639 |
| 1497.519971 | 189.510854 | 4.277E-06   | 0.006404887 |
| 1497.559971 | 151.965216 | 3.42964E-06 | 0.005136096 |
| 1497.599971 | 133.760597 | 3.01879E-06 | 0.00452094  |
| 1497.639971 | 138.002756 | 3.11453E-06 | 0.004664445 |
| 1497.679971 | 153.313033 | 3.46006E-06 | 0.005182065 |
| 1497.719971 | 155.996818 | 3.52063E-06 | 0.005272919 |
| 1497.759971 | 153.734557 | 3.46957E-06 | 0.00519659  |
| 1497.799971 | 148.218146 | 3.34508E-06 | 0.005010256 |
| 1497.839971 | 154.414809 | 3.48493E-06 | 0.005219863 |
| 1497.879971 | 184.806328 | 4.17082E-06 | 0.00624739  |
| 1497.919971 | 202.928161 | 4.57981E-06 | 0.006860183 |
| 1497.959971 | 192.099204 | 4.33541E-06 | 0.006494273 |
| 1497.999971 | 177.67866  | 4.00996E-06 | 0.00600692  |
| 1498.039971 | 170.756892 | 3.85375E-06 | 0.005773064 |
| 1498.079971 | 159.955606 | 3.60998E-06 | 0.005408032 |
| 1498.119971 | 161.135507 | 3.6366E-06  | 0.005448069 |
| 1498.159971 | 185.700235 | 4.191E-06   | 0.006278782 |
| 1498.199971 | 223.953713 | 5.05432E-06 | 0.007572387 |
| 1498.239971 | 227.711288 | 5.13913E-06 | 0.007699645 |
| 1498.279971 | 199.570032 | 4.50402E-06 | 0.006748279 |
| 1498.319971 | 181.606065 | 4.0986E-06  | 0.006141008 |
| 1498.359971 | 208.231364 | 4.69949E-06 | 0.00704153  |
| 1498.399971 | 218.745779 | 4.93679E-06 | 0.007397282 |
| 1498.439971 | 192.890116 | 4.35326E-06 | 0.006523101 |
| 1498.479971 | 181.348331 | 4.09278E-06 | 0.006132948 |
| 1498.519971 | 181.810191 | 4.1032E-06  | 0.006148731 |
| 1498.559971 | 189.548394 | 4.27784E-06 | 0.006410605 |
| 1498.599971 | 184.346392 | 4.16044E-06 | 0.006234837 |
| 1498.639971 | 183.472337 | 4.14072E-06 | 0.006205441 |
| 1498.679971 | 170.630603 | 3.8509E-06  | 0.005771259 |
| 1498.719971 | 148.227567 | 3.34529E-06 | 0.005013653 |

|             |            |             |             |
|-------------|------------|-------------|-------------|
| 1498.759971 | 147.215016 | 3.32244E-06 | 0.004979537 |
| 1498.799971 | 158.060288 | 3.5672E-06  | 0.00534652  |
| 1498.839971 | 171.611866 | 3.87304E-06 | 0.005805068 |
| 1498.879971 | 184.200847 | 4.15716E-06 | 0.006231079 |
| 1498.919971 | 183.639787 | 4.14449E-06 | 0.006212265 |
| 1498.959971 | 170.592471 | 3.85003E-06 | 0.005771048 |
| 1498.999971 | 161.04319  | 3.63452E-06 | 0.005448146 |
| 1499.039971 | 183.423476 | 4.13961E-06 | 0.006205444 |
| 1499.079971 | 196.363752 | 4.43166E-06 | 0.006643407 |
| 1499.119971 | 193.684826 | 4.3712E-06  | 0.006552948 |
| 1499.159971 | 183.961773 | 4.15176E-06 | 0.006224154 |
| 1499.199971 | 195.416276 | 4.41027E-06 | 0.006611881 |
| 1499.239971 | 210.382216 | 4.74803E-06 | 0.007118442 |
| 1499.279971 | 214.278867 | 4.83598E-06 | 0.007250481 |
| 1499.319971 | 240.578912 | 5.42953E-06 | 0.008140604 |
| 1499.359971 | 269.071804 | 6.07258E-06 | 0.009104977 |
| 1499.399971 | 256.559619 | 5.79019E-06 | 0.008681816 |
| 1499.439971 | 218.282087 | 4.92632E-06 | 0.007386725 |
| 1499.479971 | 197.27407  | 4.4522E-06  | 0.006675986 |
| 1499.519971 | 182.058381 | 4.1088E-06  | 0.006161234 |
| 1499.559971 | 181.967135 | 4.10674E-06 | 0.00615831  |
| 1499.599971 | 177.449063 | 4.00478E-06 | 0.006005565 |
| 1499.639971 | 177.846667 | 4.01375E-06 | 0.006019182 |
| 1499.679971 | 162.822204 | 3.67467E-06 | 0.00551083  |
| 1499.719971 | 157.403059 | 3.55237E-06 | 0.005327557 |
| 1499.759971 | 183.642405 | 4.14455E-06 | 0.006215835 |
| 1499.799971 | 210.482345 | 4.75029E-06 | 0.00712449  |
| 1499.839971 | 199.163762 | 4.49485E-06 | 0.006741554 |
| 1499.879971 | 172.669517 | 3.89691E-06 | 0.005844898 |
| 1499.919971 | 165.514404 | 3.73543E-06 | 0.005602845 |
| 1499.959971 | 164.374448 | 3.7097E-06  | 0.005564405 |
| 1499.999971 | 167.88689  | 3.78897E-06 | 0.00568346  |
| 1500.039971 | 159.30366  | 3.59526E-06 | 0.005393036 |
| 1500.079971 | 160.234815 | 3.61628E-06 | 0.005424704 |
| 1500.119971 | 167.71318  | 3.78505E-06 | 0.005678033 |
| 1500.159971 | 185.230415 | 4.18039E-06 | 0.006271257 |
| 1500.199971 | 202.122097 | 4.56161E-06 | 0.006843333 |
| 1500.239971 | 206.690201 | 4.66471E-06 | 0.006998184 |
| 1500.279971 | 218.631708 | 4.93421E-06 | 0.007402701 |
| 1500.319971 | 225.541617 | 5.09016E-06 | 0.007636869 |
| 1500.359971 | 225.081412 | 5.07977E-06 | 0.00762149  |
| 1500.399971 | 221.849117 | 5.00683E-06 | 0.007512241 |
| 1500.439971 | 206.837377 | 4.66803E-06 | 0.007004101 |
| 1500.479971 | 197.256676 | 4.45181E-06 | 0.006679849 |
| 1500.519971 | 182.976425 | 4.12952E-06 | 0.006196432 |
| 1500.559971 | 175.734078 | 3.96607E-06 | 0.005951331 |

|             |            |             |             |
|-------------|------------|-------------|-------------|
| 1500.599971 | 176.15228  | 3.97551E-06 | 0.005965653 |
| 1500.639971 | 169.801924 | 3.83219E-06 | 0.005750742 |
| 1500.679971 | 165.470733 | 3.73444E-06 | 0.005604205 |
| 1500.719971 | 179.709761 | 4.0558E-06  | 0.006086619 |
| 1500.759971 | 195.029364 | 4.40154E-06 | 0.006605657 |
| 1500.799971 | 189.309345 | 4.27245E-06 | 0.00641209  |
| 1500.839971 | 177.894525 | 4.01483E-06 | 0.00602562  |
| 1500.879971 | 169.108853 | 3.81655E-06 | 0.005728185 |
| 1500.919971 | 168.449913 | 3.80168E-06 | 0.005706017 |
| 1500.959971 | 166.800174 | 3.76445E-06 | 0.005650285 |
| 1500.999971 | 174.541743 | 3.93916E-06 | 0.005912685 |
| 1501.039971 | 202.154727 | 4.56235E-06 | 0.006848271 |
| 1501.079971 | 215.943712 | 4.87355E-06 | 0.007315586 |
| 1501.119971 | 215.677    | 4.86753E-06 | 0.007306746 |
| 1501.159971 | 208.94049  | 4.7155E-06  | 0.007078714 |
| 1501.199971 | 214.525276 | 4.84154E-06 | 0.007268115 |
| 1501.239971 | 232.081206 | 5.23775E-06 | 0.007863119 |
| 1501.279971 | 248.345857 | 5.60482E-06 | 0.008414404 |
| 1501.319971 | 237.911432 | 5.36933E-06 | 0.008061082 |
| 1501.359971 | 208.114058 | 4.69684E-06 | 0.007051654 |
| 1501.399971 | 186.854694 | 4.21705E-06 | 0.006331479 |
| 1501.439971 | 175.645846 | 3.96408E-06 | 0.005951831 |
| 1501.479971 | 181.895042 | 4.10512E-06 | 0.006163752 |
| 1501.519971 | 176.204245 | 3.97668E-06 | 0.005971071 |
| 1501.559971 | 155.314145 | 3.50522E-06 | 0.005263304 |
| 1501.599971 | 139.211025 | 3.1418E-06  | 0.004717725 |
| 1501.639971 | 141.508827 | 3.19366E-06 | 0.004795723 |
| 1501.679971 | 150.180678 | 3.38937E-06 | 0.005089747 |
| 1501.719971 | 154.11766  | 3.47822E-06 | 0.005223314 |
| 1501.759971 | 146.379917 | 3.30359E-06 | 0.0049612   |
| 1501.799971 | 142.668949 | 3.21984E-06 | 0.004835555 |
| 1501.839971 | 146.725259 | 3.31138E-06 | 0.00497317  |
| 1501.879971 | 159.18103  | 3.59249E-06 | 0.005395495 |
| 1501.919971 | 174.95469  | 3.94848E-06 | 0.005930306 |
| 1501.959971 | 170.065064 | 3.83813E-06 | 0.00576472  |
| 1501.999971 | 180.717646 | 4.07855E-06 | 0.006125975 |
| 1502.039971 | 175.806416 | 3.96771E-06 | 0.005959653 |
| 1502.079971 | 167.290943 | 3.77552E-06 | 0.005671138 |
| 1502.119971 | 190.085265 | 4.28996E-06 | 0.006444034 |
| 1502.159971 | 191.459188 | 4.32097E-06 | 0.006490784 |
| 1502.199971 | 188.925279 | 4.26378E-06 | 0.006405051 |
| 1502.239971 | 199.923356 | 4.51199E-06 | 0.006778094 |
| 1502.279971 | 217.540068 | 4.90958E-06 | 0.007375558 |
| 1502.319971 | 238.321105 | 5.37858E-06 | 0.008080341 |
| 1502.359971 | 231.808337 | 5.23159E-06 | 0.007859733 |
| 1502.399971 | 216.895695 | 4.89503E-06 | 0.007354299 |



|             |            |             |             |
|-------------|------------|-------------|-------------|
| 1502.439971 | 192.431111 | 4.3429E-06  | 0.00652495  |
| 1502.479971 | 174.053172 | 3.92814E-06 | 0.005901948 |
| 1502.519971 | 164.393923 | 3.71014E-06 | 0.005574562 |
| 1502.559971 | 155.466997 | 3.50867E-06 | 0.005271992 |
| 1502.599971 | 146.731567 | 3.31153E-06 | 0.004975901 |
| 1502.639971 | 135.059112 | 3.0481E-06  | 0.004580191 |
| 1502.679971 | 139.774895 | 3.15452E-06 | 0.004740241 |
| 1502.719971 | 150.741706 | 3.40203E-06 | 0.005112299 |
| 1502.759971 | 166.683033 | 3.7618E-06  | 0.005653088 |
| 1502.799971 | 179.62636  | 4.05392E-06 | 0.006092226 |
| 1502.839971 | 187.646143 | 4.23491E-06 | 0.006364395 |
| 1502.879971 | 187.546444 | 4.23266E-06 | 0.006361183 |
| 1502.919971 | 185.860068 | 4.1946E-06  | 0.006304152 |
| 1502.959971 | 181.33506  | 4.09248E-06 | 0.006150833 |
| 1502.999971 | 169.565394 | 3.82685E-06 | 0.005751763 |
| 1503.039971 | 161.785405 | 3.65127E-06 | 0.005488007 |
| 1503.079971 | 162.018751 | 3.65654E-06 | 0.005496068 |
| 1503.119971 | 191.431789 | 4.32035E-06 | 0.006494003 |
| 1503.159971 | 196.610822 | 4.43723E-06 | 0.00666987  |
| 1503.199971 | 184.485047 | 4.16357E-06 | 0.006258679 |
| 1503.239971 | 223.821897 | 5.05135E-06 | 0.007593389 |
| 1503.279971 | 254.838551 | 5.75135E-06 | 0.008645891 |
| 1503.319971 | 246.324215 | 5.55919E-06 | 0.008357248 |
| 1503.359971 | 213.382872 | 4.81575E-06 | 0.007239812 |
| 1503.399971 | 202.179597 | 4.56291E-06 | 0.006859882 |
| 1503.439971 | 195.112677 | 4.40342E-06 | 0.00662028  |
| 1503.479971 | 179.921581 | 4.06058E-06 | 0.006105    |
| 1503.519971 | 167.423792 | 3.77852E-06 | 0.005681083 |
| 1503.559971 | 162.215652 | 3.66098E-06 | 0.005504505 |
| 1503.599971 | 156.947125 | 3.54208E-06 | 0.005325868 |
| 1503.639971 | 142.55119  | 3.21718E-06 | 0.004837483 |
| 1503.679971 | 139.143865 | 3.14028E-06 | 0.004721981 |
| 1503.719971 | 133.625443 | 3.01574E-06 | 0.004534829 |
| 1503.759971 | 130.535601 | 2.94601E-06 | 0.004430087 |
| 1503.799971 | 154.252817 | 3.48127E-06 | 0.005235136 |
| 1503.839971 | 180.795914 | 4.08031E-06 | 0.006136136 |
| 1503.879971 | 167.226242 | 3.77406E-06 | 0.005675738 |
| 1503.919971 | 152.366596 | 3.4387E-06  | 0.005171532 |
| 1503.959971 | 148.338261 | 3.34779E-06 | 0.005034939 |
| 1503.999971 | 153.790222 | 3.47083E-06 | 0.00522013  |
| 1504.039971 | 154.15658  | 3.4791E-06  | 0.005232704 |
| 1504.079971 | 168.871652 | 3.8112E-06  | 0.005732347 |
| 1504.119971 | 175.946035 | 3.97086E-06 | 0.005972645 |
| 1504.159971 | 161.449521 | 3.64369E-06 | 0.005480694 |
| 1504.199971 | 167.072965 | 3.7706E-06  | 0.005671743 |
| 1504.239971 | 193.129997 | 4.35868E-06 | 0.006556493 |

|             |            |             |             |
|-------------|------------|-------------|-------------|
| 1504.279971 | 213.653074 | 4.82185E-06 | 0.007253416 |
| 1504.319971 | 225.627521 | 5.0921E-06  | 0.007660146 |
| 1504.359971 | 222.436835 | 5.02009E-06 | 0.007552022 |
| 1504.399971 | 216.49183  | 4.88592E-06 | 0.007350376 |
| 1504.439971 | 206.022329 | 4.64964E-06 | 0.0069951   |
| 1504.479971 | 188.721564 | 4.25918E-06 | 0.006407855 |
| 1504.519971 | 152.341232 | 3.43813E-06 | 0.005172734 |
| 1504.559971 | 141.788831 | 3.19998E-06 | 0.004814556 |
| 1504.599971 | 160.448009 | 3.62109E-06 | 0.005448289 |
| 1504.639971 | 167.203019 | 3.77354E-06 | 0.005677818 |
| 1504.679971 | 164.117769 | 3.70391E-06 | 0.005573198 |
| 1504.719971 | 158.770509 | 3.58323E-06 | 0.005391757 |
| 1504.759971 | 159.116875 | 3.59105E-06 | 0.005403663 |
| 1504.799971 | 181.001455 | 4.08495E-06 | 0.006147034 |
| 1504.839971 | 190.981207 | 4.31018E-06 | 0.006486131 |
| 1504.879971 | 178.346105 | 4.02502E-06 | 0.006057177 |
| 1504.919971 | 149.255746 | 3.36849E-06 | 0.005069314 |
| 1504.959971 | 126.411942 | 2.85294E-06 | 0.004293563 |
| 1504.999971 | 125.651072 | 2.83577E-06 | 0.004267833 |
| 1505.039971 | 141.485971 | 3.19314E-06 | 0.004805805 |
| 1505.079971 | 164.982901 | 3.72343E-06 | 0.005604066 |
| 1505.119971 | 187.970888 | 4.24224E-06 | 0.006385082 |
| 1505.159971 | 208.8099   | 4.71255E-06 | 0.00709314  |
| 1505.199971 | 212.692319 | 4.80017E-06 | 0.007225215 |
| 1505.239971 | 212.633622 | 4.79884E-06 | 0.007223413 |
| 1505.279971 | 211.16972  | 4.76581E-06 | 0.007173873 |
| 1505.319971 | 202.064976 | 4.56033E-06 | 0.006864748 |
| 1505.359971 | 202.885238 | 4.57884E-06 | 0.006892798 |
| 1505.399971 | 211.382496 | 4.77061E-06 | 0.007181674 |
| 1505.439971 | 192.893749 | 4.35334E-06 | 0.006553697 |
| 1505.479971 | 185.507881 | 4.18665E-06 | 0.006302924 |
| 1505.519971 | 182.629712 | 4.1217E-06  | 0.006205299 |
| 1505.559971 | 181.189639 | 4.0892E-06  | 0.006156532 |
| 1505.599971 | 185.996225 | 4.19768E-06 | 0.00632002  |
| 1505.639971 | 178.996375 | 4.0397E-06  | 0.006082332 |
| 1505.679971 | 160.947666 | 3.63236E-06 | 0.005469179 |
| 1505.719971 | 174.989904 | 3.94928E-06 | 0.005946507 |
| 1505.759971 | 199.387541 | 4.4999E-06  | 0.006775768 |
| 1505.799971 | 217.19012  | 4.90168E-06 | 0.007380947 |
| 1505.839971 | 194.10792  | 4.38075E-06 | 0.006596702 |
| 1505.879971 | 159.362555 | 3.59659E-06 | 0.005416034 |
| 1505.919971 | 150.301182 | 3.39209E-06 | 0.005108214 |
| 1505.959971 | 159.524867 | 3.60025E-06 | 0.005421838 |
| 1505.999971 | 169.127755 | 3.81698E-06 | 0.005748369 |
| 1506.039971 | 167.433293 | 3.77874E-06 | 0.005690928 |
| 1506.079971 | 158.973983 | 3.58782E-06 | 0.005403546 |

|             |            |             |             |
|-------------|------------|-------------|-------------|
| 1506.119971 | 168.637252 | 3.80591E-06 | 0.005732154 |
| 1506.159971 | 173.913166 | 3.92498E-06 | 0.005911645 |
| 1506.199971 | 178.849164 | 4.03638E-06 | 0.00607959  |
| 1506.239971 | 177.786302 | 4.01239E-06 | 0.006043621 |
| 1506.279971 | 202.436097 | 4.5687E-06  | 0.006881742 |
| 1506.319971 | 255.099773 | 5.75725E-06 | 0.008672255 |
| 1506.359971 | 264.60956  | 5.97187E-06 | 0.008995785 |
| 1506.399971 | 217.208979 | 4.9021E-06  | 0.007384529 |
| 1506.439971 | 181.605937 | 4.09859E-06 | 0.006174284 |
| 1506.479971 | 159.873852 | 3.60813E-06 | 0.005435576 |
| 1506.519971 | 153.172249 | 3.45688E-06 | 0.005207865 |
| 1506.559971 | 163.96367  | 3.70043E-06 | 0.005574922 |
| 1506.599971 | 168.304881 | 3.79841E-06 | 0.005722679 |
| 1506.639971 | 167.584195 | 3.78214E-06 | 0.005698326 |
| 1506.679971 | 171.663579 | 3.87421E-06 | 0.005837191 |
| 1506.719971 | 174.874562 | 3.94668E-06 | 0.005946534 |
| 1506.759971 | 175.717914 | 3.96571E-06 | 0.005975371 |
| 1506.799971 | 173.455949 | 3.91466E-06 | 0.005898608 |
| 1506.839971 | 170.045243 | 3.83768E-06 | 0.005782776 |
| 1506.879971 | 165.36138  | 3.73198E-06 | 0.00562364  |
| 1506.919971 | 177.153338 | 3.9981E-06  | 0.006024823 |
| 1506.959971 | 158.23446  | 3.57113E-06 | 0.005381552 |
| 1506.999971 | 144.351041 | 3.2578E-06  | 0.004909507 |
| 1507.039971 | 166.712363 | 3.76247E-06 | 0.005670186 |
| 1507.079971 | 189.692108 | 4.28109E-06 | 0.00645194  |
| 1507.119971 | 189.002084 | 4.26551E-06 | 0.006428641 |
| 1507.159971 | 204.385116 | 4.61269E-06 | 0.006952058 |
| 1507.199971 | 214.552492 | 4.84215E-06 | 0.00729809  |
| 1507.239971 | 204.245098 | 4.60953E-06 | 0.006947664 |
| 1507.279971 | 216.065854 | 4.87631E-06 | 0.007349957 |
| 1507.319971 | 235.89484  | 5.32382E-06 | 0.008024697 |
| 1507.359971 | 219.820016 | 4.96103E-06 | 0.00747806  |
| 1507.399971 | 188.174122 | 4.24683E-06 | 0.006401668 |
| 1507.439971 | 180.853893 | 4.08162E-06 | 0.006152798 |
| 1507.479971 | 179.77965  | 4.05738E-06 | 0.006116413 |
| 1507.519971 | 179.076917 | 4.04152E-06 | 0.006092667 |
| 1507.559971 | 175.687318 | 3.96502E-06 | 0.005977503 |
| 1507.599971 | 166.385894 | 3.7551E-06  | 0.005661185 |
| 1507.639971 | 151.579094 | 3.42093E-06 | 0.005157529 |
| 1507.679971 | 160.122519 | 3.61374E-06 | 0.005448367 |
| 1507.719971 | 164.404607 | 3.71038E-06 | 0.005594219 |
| 1507.759971 | 152.188755 | 3.43469E-06 | 0.005178685 |
| 1507.799971 | 139.338777 | 3.14468E-06 | 0.004741552 |
| 1507.839971 | 145.754927 | 3.28949E-06 | 0.004960018 |
| 1507.879971 | 165.546045 | 3.73614E-06 | 0.005633656 |
| 1507.919971 | 168.242152 | 3.79699E-06 | 0.005725559 |

|             |            |             |             |
|-------------|------------|-------------|-------------|
| 1507.959971 | 168.255006 | 3.79728E-06 | 0.005726148 |
| 1507.999971 | 174.298712 | 3.93368E-06 | 0.005931988 |
| 1508.039971 | 171.759064 | 3.87636E-06 | 0.00584571  |
| 1508.079971 | 172.690033 | 3.89737E-06 | 0.005877551 |
| 1508.119971 | 172.539665 | 3.89398E-06 | 0.005872589 |
| 1508.159971 | 179.377496 | 4.0483E-06  | 0.006105484 |
| 1508.199971 | 198.090289 | 4.47062E-06 | 0.006742592 |
| 1508.239971 | 209.693688 | 4.73249E-06 | 0.007137737 |
| 1508.279971 | 233.995189 | 5.28095E-06 | 0.007965144 |
| 1508.319971 | 239.935724 | 5.41502E-06 | 0.008167575 |
| 1508.359971 | 224.46414  | 5.06584E-06 | 0.007641115 |
| 1508.399971 | 225.528754 | 5.08987E-06 | 0.00767756  |
| 1508.439971 | 218.352389 | 4.92791E-06 | 0.007433455 |
| 1508.479971 | 193.249525 | 4.36137E-06 | 0.006579043 |
| 1508.519971 | 176.195063 | 3.97648E-06 | 0.005998595 |
| 1508.559971 | 156.957479 | 3.54231E-06 | 0.00534379  |
| 1508.599971 | 135.963917 | 3.06852E-06 | 0.004629163 |
| 1508.639971 | 139.856537 | 3.15637E-06 | 0.004761822 |
| 1508.679971 | 146.711545 | 3.31108E-06 | 0.004995353 |
| 1508.719971 | 172.510914 | 3.89333E-06 | 0.005873946 |
| 1508.759971 | 208.427864 | 4.70393E-06 | 0.007097096 |
| 1508.799971 | 222.070437 | 5.01182E-06 | 0.007561835 |
| 1508.839971 | 224.615982 | 5.06927E-06 | 0.007648717 |
| 1508.879971 | 213.716591 | 4.82329E-06 | 0.007277759 |
| 1508.919971 | 209.797224 | 4.73483E-06 | 0.007144481 |
| 1508.959971 | 212.909081 | 4.80506E-06 | 0.007250645 |
| 1508.999971 | 216.73354  | 4.89137E-06 | 0.007381083 |
| 1509.039971 | 220.582949 | 4.97825E-06 | 0.007512378 |
| 1509.079971 | 218.487673 | 4.93096E-06 | 0.007441217 |
| 1509.119971 | 211.528749 | 4.77391E-06 | 0.007204402 |
| 1509.159971 | 214.361933 | 4.83785E-06 | 0.00730109  |
| 1509.199971 | 226.671967 | 5.11567E-06 | 0.00772057  |
| 1509.239971 | 231.007496 | 5.21352E-06 | 0.007868449 |
| 1509.279971 | 238.771412 | 5.38874E-06 | 0.008133115 |
| 1509.319971 | 216.155269 | 4.87832E-06 | 0.007362951 |
| 1509.359971 | 187.123645 | 4.22312E-06 | 0.006374208 |
| 1509.399971 | 171.828266 | 3.87792E-06 | 0.005853339 |
| 1509.439971 | 170.205192 | 3.84129E-06 | 0.005798203 |
| 1509.479971 | 195.289502 | 4.40741E-06 | 0.0066529   |
| 1509.519971 | 188.141548 | 4.24609E-06 | 0.006409562 |
| 1509.559971 | 158.804336 | 3.58399E-06 | 0.005410252 |
| 1509.599971 | 127.793111 | 2.88411E-06 | 0.004353856 |
| 1509.639971 | 119.531612 | 2.69766E-06 | 0.004072498 |
| 1509.679971 | 132.655239 | 2.99384E-06 | 0.004519746 |
| 1509.719971 | 149.394636 | 3.37163E-06 | 0.005090215 |
| 1509.759971 | 154.207775 | 3.48025E-06 | 0.005254349 |

|             |            |             |             |
|-------------|------------|-------------|-------------|
| 1509.799971 | 167.718569 | 3.78517E-06 | 0.005714856 |
| 1509.839971 | 190.033783 | 4.2888E-06  | 0.006475398 |
| 1509.879971 | 184.461461 | 4.16304E-06 | 0.006285688 |
| 1509.919971 | 186.798902 | 4.21579E-06 | 0.006365507 |
| 1509.959971 | 195.472388 | 4.41154E-06 | 0.006661248 |
| 1509.999971 | 191.097555 | 4.31281E-06 | 0.006512336 |
| 1510.039971 | 193.739634 | 4.37243E-06 | 0.00660255  |
| 1510.079971 | 185.812768 | 4.19354E-06 | 0.006332574 |
| 1510.119971 | 178.806027 | 4.0354E-06  | 0.006093943 |
| 1510.159971 | 183.94347  | 4.15135E-06 | 0.006269199 |
| 1510.199971 | 180.647874 | 4.07697E-06 | 0.006157041 |
| 1510.239971 | 192.063661 | 4.33461E-06 | 0.0065463   |
| 1510.279971 | 208.726147 | 4.71066E-06 | 0.007114413 |
| 1510.319971 | 243.385808 | 5.49288E-06 | 0.008296004 |
| 1510.359971 | 256.338587 | 5.7852E-06  | 0.008737742 |
| 1510.399971 | 230.847922 | 5.20992E-06 | 0.007869057 |
| 1510.439971 | 211.984151 | 4.78419E-06 | 0.007226227 |
| 1510.479971 | 194.396685 | 4.38726E-06 | 0.006626872 |
| 1510.519971 | 166.29777  | 3.75311E-06 | 0.005669146 |
| 1510.559971 | 163.38965  | 3.68748E-06 | 0.005570155 |
| 1510.599971 | 174.957525 | 3.94855E-06 | 0.005964676 |
| 1510.639971 | 161.815764 | 3.65196E-06 | 0.005516791 |
| 1510.679971 | 145.013419 | 3.27275E-06 | 0.004944079 |
| 1510.719971 | 146.34375  | 3.30277E-06 | 0.004989568 |
| 1510.759971 | 139.769443 | 3.1544E-06  | 0.004765544 |
| 1510.799971 | 146.2833   | 3.30141E-06 | 0.004987771 |
| 1510.839971 | 156.697146 | 3.53644E-06 | 0.005342989 |
| 1510.879971 | 159.302319 | 3.59523E-06 | 0.005431963 |
| 1510.919971 | 179.41499  | 4.04915E-06 | 0.006117936 |
| 1510.959971 | 181.909483 | 4.10544E-06 | 0.006203161 |
| 1510.999971 | 172.481858 | 3.89268E-06 | 0.005881832 |
| 1511.039971 | 174.540701 | 3.93914E-06 | 0.005952199 |
| 1511.079971 | 174.64395  | 3.94147E-06 | 0.005955877 |
| 1511.119971 | 168.005515 | 3.79165E-06 | 0.005729639 |
| 1511.159971 | 175.697945 | 3.96526E-06 | 0.005992139 |
| 1511.199971 | 215.733042 | 4.86879E-06 | 0.007357722 |
| 1511.239971 | 241.049978 | 5.44016E-06 | 0.008221391 |
| 1511.279971 | 215.192877 | 4.8566E-06  | 0.007339688 |
| 1511.319971 | 196.9722   | 4.44539E-06 | 0.006718404 |
| 1511.359971 | 194.466149 | 4.38883E-06 | 0.006633102 |
| 1511.399971 | 186.732201 | 4.21429E-06 | 0.006369471 |
| 1511.439971 | 163.748136 | 3.69557E-06 | 0.005585628 |
| 1511.479971 | 150.786431 | 3.40304E-06 | 0.005143626 |
| 1511.519971 | 160.540811 | 3.62318E-06 | 0.005476513 |
| 1511.559971 | 158.843505 | 3.58488E-06 | 0.005418756 |
| 1511.599971 | 150.467288 | 3.39584E-06 | 0.005133147 |

|             |            |             |             |
|-------------|------------|-------------|-------------|
| 1511.639971 | 171.279384 | 3.86554E-06 | 0.0058433   |
| 1511.679971 | 181.448741 | 4.09505E-06 | 0.006190398 |
| 1511.719971 | 174.147958 | 3.93028E-06 | 0.005941478 |
| 1511.759971 | 175.325271 | 3.95685E-06 | 0.005981803 |
| 1511.799971 | 171.216534 | 3.86412E-06 | 0.005841775 |
| 1511.839971 | 162.805003 | 3.67428E-06 | 0.005554927 |
| 1511.879971 | 158.158713 | 3.56942E-06 | 0.005396537 |
| 1511.919971 | 178.446587 | 4.02729E-06 | 0.006088942 |
| 1511.959971 | 191.476789 | 4.32136E-06 | 0.00653373  |
| 1511.999971 | 183.796308 | 4.14803E-06 | 0.006271816 |
| 1512.039971 | 185.773654 | 4.19265E-06 | 0.006339458 |
| 1512.079971 | 185.245493 | 4.18073E-06 | 0.006321602 |
| 1512.119971 | 191.408339 | 4.31982E-06 | 0.006532085 |
| 1512.159971 | 191.660135 | 4.3255E-06  | 0.006540851 |
| 1512.199971 | 191.677696 | 4.3259E-06  | 0.006541624 |
| 1512.239971 | 182.737058 | 4.12412E-06 | 0.00623666  |
| 1512.279971 | 176.682948 | 3.98749E-06 | 0.006030198 |
| 1512.319971 | 205.770159 | 4.64395E-06 | 0.007023132 |
| 1512.359971 | 219.391645 | 4.95136E-06 | 0.007488244 |
| 1512.399971 | 201.253199 | 4.542E-06   | 0.006869327 |
| 1512.439971 | 193.859306 | 4.37513E-06 | 0.006617128 |
| 1512.479971 | 186.366461 | 4.20603E-06 | 0.006361538 |
| 1512.519971 | 198.750811 | 4.48553E-06 | 0.006784452 |
| 1512.559971 | 185.343328 | 4.18294E-06 | 0.006326949 |
| 1512.599971 | 158.997646 | 3.58836E-06 | 0.005427746 |
| 1512.639971 | 165.240565 | 3.72925E-06 | 0.005641012 |
| 1512.679971 | 182.548486 | 4.11987E-06 | 0.006232037 |
| 1512.719971 | 175.771486 | 3.96692E-06 | 0.006000835 |
| 1512.759971 | 146.720579 | 3.31128E-06 | 0.00500917  |
| 1512.799971 | 139.906616 | 3.1575E-06  | 0.004776662 |
| 1512.839971 | 155.820806 | 3.51666E-06 | 0.005320142 |
| 1512.879971 | 174.193538 | 3.93131E-06 | 0.005947593 |
| 1512.919971 | 186.861825 | 4.21721E-06 | 0.006380303 |
| 1512.959971 | 195.41654  | 4.41028E-06 | 0.006672576 |
| 1512.999971 | 209.552562 | 4.72931E-06 | 0.007155445 |
| 1513.039971 | 210.437856 | 4.74929E-06 | 0.007185865 |
| 1513.079971 | 192.833384 | 4.35198E-06 | 0.006584895 |
| 1513.119971 | 179.985306 | 4.06202E-06 | 0.00614632  |
| 1513.159971 | 184.41505  | 4.16199E-06 | 0.006297758 |
| 1513.199971 | 191.637444 | 4.32499E-06 | 0.006544575 |
| 1513.239971 | 192.849247 | 4.35234E-06 | 0.006586133 |
| 1513.279971 | 196.512767 | 4.43502E-06 | 0.006711426 |
| 1513.319971 | 212.746229 | 4.80139E-06 | 0.007266033 |
| 1513.359971 | 223.267988 | 5.03885E-06 | 0.00762559  |
| 1513.399971 | 212.130488 | 4.78749E-06 | 0.007245387 |
| 1513.439971 | 195.836911 | 4.41977E-06 | 0.006689051 |

|             |            |             |             |
|-------------|------------|-------------|-------------|
| 1513.479971 | 179.502547 | 4.05112E-06 | 0.006131293 |
| 1513.519971 | 176.096829 | 3.97426E-06 | 0.006015122 |
| 1513.559971 | 177.047736 | 3.99572E-06 | 0.006047763 |
| 1513.599971 | 166.808308 | 3.76463E-06 | 0.005698146 |
| 1513.639971 | 157.373269 | 3.5517E-06  | 0.005375988 |
| 1513.679971 | 139.886388 | 3.15704E-06 | 0.00477875  |
| 1513.719971 | 143.640107 | 3.24176E-06 | 0.004907113 |
| 1513.759971 | 169.900722 | 3.83442E-06 | 0.005804396 |
| 1513.799971 | 186.935241 | 4.21887E-06 | 0.006386522 |
| 1513.839971 | 172.210194 | 3.88654E-06 | 0.005883606 |
| 1513.879971 | 165.15566  | 3.72733E-06 | 0.005642735 |
| 1513.919971 | 160.320622 | 3.61821E-06 | 0.005477685 |
| 1513.959971 | 160.99607  | 3.63346E-06 | 0.005500909 |
| 1513.999971 | 161.363354 | 3.64175E-06 | 0.005513604 |
| 1514.039971 | 176.32845  | 3.97949E-06 | 0.006025103 |
| 1514.079971 | 177.190852 | 3.99895E-06 | 0.006054731 |
| 1514.119971 | 166.442188 | 3.75637E-06 | 0.005687592 |
| 1514.159971 | 167.323757 | 3.77626E-06 | 0.005717868 |
| 1514.199971 | 188.23249  | 4.24815E-06 | 0.006432541 |
| 1514.239971 | 205.123644 | 4.62935E-06 | 0.007009954 |
| 1514.279971 | 229.32099  | 5.17546E-06 | 0.007837088 |
| 1514.319971 | 240.986972 | 5.43874E-06 | 0.008235993 |
| 1514.359971 | 223.760966 | 5.04997E-06 | 0.007647477 |
| 1514.399971 | 209.515538 | 4.72847E-06 | 0.007160801 |
| 1514.439971 | 194.078141 | 4.38007E-06 | 0.006633358 |
| 1514.479971 | 171.443347 | 3.86924E-06 | 0.005859883 |
| 1514.519971 | 154.450008 | 3.48572E-06 | 0.005279195 |
| 1514.559971 | 148.079051 | 3.34194E-06 | 0.005061565 |
| 1514.599971 | 142.943704 | 3.22604E-06 | 0.004886161 |
| 1514.639971 | 135.345228 | 3.05455E-06 | 0.004626548 |
| 1514.679971 | 136.186746 | 3.07355E-06 | 0.004655437 |
| 1514.719971 | 143.862499 | 3.24678E-06 | 0.004917957 |
| 1514.759971 | 164.370053 | 3.7096E-06  | 0.005619158 |
| 1514.799971 | 168.705084 | 3.80744E-06 | 0.005767508 |
| 1514.839971 | 160.01861  | 3.6114E-06  | 0.005470689 |
| 1514.879971 | 159.112279 | 3.59094E-06 | 0.005439847 |
| 1514.919971 | 162.709155 | 3.67212E-06 | 0.005562966 |
| 1514.959971 | 158.189174 | 3.57011E-06 | 0.005408573 |
| 1514.999971 | 154.223915 | 3.48062E-06 | 0.005273138 |
| 1515.039971 | 161.704624 | 3.64945E-06 | 0.00552906  |
| 1515.079971 | 171.447126 | 3.86932E-06 | 0.005862334 |
| 1515.119971 | 183.843459 | 4.14909E-06 | 0.00628637  |
| 1515.159971 | 187.731962 | 4.23685E-06 | 0.006419504 |
| 1515.199971 | 197.610922 | 4.4598E-06  | 0.006757494 |
| 1515.239971 | 232.411092 | 5.24519E-06 | 0.007947729 |
| 1515.279971 | 258.029665 | 5.82337E-06 | 0.008824036 |

|             |            |             |             |
|-------------|------------|-------------|-------------|
| 1515.319971 | 247.688771 | 5.58999E-06 | 0.008470624 |
| 1515.359971 | 231.235315 | 5.21866E-06 | 0.007908147 |
| 1515.399971 | 215.003596 | 4.85233E-06 | 0.007353223 |
| 1515.439971 | 215.580249 | 4.86535E-06 | 0.00737314  |
| 1515.479971 | 228.451878 | 5.15584E-06 | 0.007813573 |
| 1515.519971 | 205.842636 | 4.64558E-06 | 0.007040472 |
| 1515.559971 | 176.41106  | 3.98135E-06 | 0.006033978 |
| 1515.599971 | 145.850485 | 3.29164E-06 | 0.004988813 |
| 1515.639971 | 148.108469 | 3.3426E-06  | 0.005066181 |
| 1515.679971 | 163.328852 | 3.6861E-06  | 0.005586955 |
| 1515.719971 | 156.429319 | 3.53039E-06 | 0.005351085 |
| 1515.759971 | 146.104437 | 3.29737E-06 | 0.004998027 |
| 1515.799971 | 167.787891 | 3.78674E-06 | 0.005739939 |
| 1515.839971 | 202.717944 | 4.57506E-06 | 0.006935061 |
| 1515.879971 | 200.742336 | 4.53047E-06 | 0.006867656 |
| 1515.919971 | 170.03976  | 3.83756E-06 | 0.005817435 |
| 1515.959971 | 164.996755 | 3.72375E-06 | 0.005645051 |
| 1515.999971 | 160.690282 | 3.62656E-06 | 0.005497859 |
| 1516.039971 | 151.878682 | 3.42769E-06 | 0.005196516 |
| 1516.079971 | 158.456529 | 3.57614E-06 | 0.005421719 |
| 1516.119971 | 160.189274 | 3.61525E-06 | 0.005481151 |
| 1516.159971 | 174.59785  | 3.94043E-06 | 0.005974323 |
| 1516.199971 | 209.740428 | 4.73355E-06 | 0.007177007 |
| 1516.239971 | 217.158455 | 4.90096E-06 | 0.007431037 |
| 1516.279971 | 217.047277 | 4.89845E-06 | 0.007427429 |
| 1516.319971 | 217.109357 | 4.89986E-06 | 0.007429749 |
| 1516.359971 | 223.30048  | 5.03958E-06 | 0.007641819 |
| 1516.399971 | 220.592776 | 4.97847E-06 | 0.007549354 |
| 1516.439971 | 222.526148 | 5.02211E-06 | 0.007615721 |
| 1516.479971 | 222.691116 | 5.02583E-06 | 0.007621568 |
| 1516.519971 | 205.320006 | 4.63379E-06 | 0.00702723  |
| 1516.559971 | 178.215449 | 4.02207E-06 | 0.006099717 |
| 1516.599971 | 153.760052 | 3.47015E-06 | 0.00526283  |
| 1516.639971 | 151.995905 | 3.43034E-06 | 0.005202584 |
| 1516.679971 | 154.794593 | 3.4935E-06  | 0.005298519 |
| 1516.719971 | 159.028942 | 3.58906E-06 | 0.005443602 |
| 1516.759971 | 165.722194 | 3.74012E-06 | 0.005672863 |
| 1516.799971 | 165.814988 | 3.74221E-06 | 0.005676189 |
| 1516.839971 | 183.868988 | 4.14967E-06 | 0.006294381 |
| 1516.879971 | 167.484935 | 3.7799E-06  | 0.005733657 |
| 1516.919971 | 146.894179 | 3.3152E-06  | 0.005028889 |
| 1516.959971 | 134.648373 | 3.03883E-06 | 0.004609778 |
| 1516.999971 | 129.624496 | 2.92544E-06 | 0.004437899 |
| 1517.039971 | 148.399689 | 3.34917E-06 | 0.005080831 |
| 1517.079971 | 164.612952 | 3.71509E-06 | 0.005636081 |
| 1517.119971 | 171.806185 | 3.87743E-06 | 0.005882521 |



|             |            |             |             |
|-------------|------------|-------------|-------------|
| 1517.159971 | 181.107952 | 4.08735E-06 | 0.00620117  |
| 1517.199971 | 205.441856 | 4.63654E-06 | 0.007034553 |
| 1517.239971 | 217.446111 | 4.90746E-06 | 0.007445788 |
| 1517.279971 | 224.529564 | 5.06732E-06 | 0.007688542 |
| 1517.319971 | 223.691732 | 5.04841E-06 | 0.007660055 |
| 1517.359971 | 224.785852 | 5.0731E-06  | 0.007697724 |
| 1517.399971 | 210.302938 | 4.74624E-06 | 0.007201951 |
| 1517.439971 | 194.170811 | 4.38216E-06 | 0.006649672 |
| 1517.479971 | 168.358323 | 3.79961E-06 | 0.005765836 |
| 1517.519971 | 152.351235 | 3.43836E-06 | 0.005217773 |
| 1517.559971 | 148.817268 | 3.3586E-06  | 0.005096875 |
| 1517.599971 | 143.112551 | 3.22985E-06 | 0.004901622 |
| 1517.639971 | 137.4955   | 3.10308E-06 | 0.004709361 |
| 1517.679971 | 137.402784 | 3.10099E-06 | 0.00470631  |
| 1517.719971 | 142.473776 | 3.21543E-06 | 0.004880129 |
| 1517.759971 | 142.423118 | 3.21429E-06 | 0.004878523 |
| 1517.799971 | 145.731152 | 3.28895E-06 | 0.004991967 |
| 1517.839971 | 170.78634  | 3.85441E-06 | 0.005850377 |
| 1517.879971 | 170.756211 | 3.85373E-06 | 0.005849499 |
| 1517.919971 | 163.513866 | 3.69028E-06 | 0.00560155  |
| 1517.959971 | 166.927587 | 3.76732E-06 | 0.005718646 |
| 1517.999971 | 178.862127 | 4.03667E-06 | 0.006127664 |
| 1518.039971 | 190.515809 | 4.29968E-06 | 0.006527081 |
| 1518.079971 | 186.19444  | 4.20215E-06 | 0.006379198 |
| 1518.119971 | 180.766027 | 4.07964E-06 | 0.006193379 |
| 1518.159971 | 173.746753 | 3.92122E-06 | 0.005953043 |
| 1518.199971 | 196.129804 | 4.42638E-06 | 0.006720125 |
| 1518.239971 | 217.070768 | 4.89898E-06 | 0.007437835 |
| 1518.279971 | 241.592398 | 5.4524E-06  | 0.008278276 |
| 1518.319971 | 242.635174 | 5.47594E-06 | 0.008314226 |
| 1518.359971 | 231.20548  | 5.21799E-06 | 0.007922781 |
| 1518.399971 | 250.83271  | 5.66094E-06 | 0.008595579 |
| 1518.439971 | 241.354052 | 5.44702E-06 | 0.00827098  |
| 1518.479971 | 196.435773 | 4.43328E-06 | 0.00673185  |
| 1518.519971 | 171.21235  | 3.86402E-06 | 0.005867598 |
| 1518.559971 | 147.991586 | 3.33996E-06 | 0.005071936 |
| 1518.599971 | 147.396371 | 3.32653E-06 | 0.00505167  |
| 1518.639971 | 158.176261 | 3.56982E-06 | 0.005421268 |
| 1518.679971 | 162.107652 | 3.65854E-06 | 0.005556157 |
| 1518.719971 | 169.887088 | 3.83411E-06 | 0.005822947 |
| 1518.759971 | 174.700521 | 3.94275E-06 | 0.005988087 |
| 1518.799971 | 162.664516 | 3.67111E-06 | 0.005575684 |
| 1518.839971 | 151.536577 | 3.41997E-06 | 0.005194386 |
| 1518.879971 | 158.809368 | 3.58411E-06 | 0.005443827 |
| 1518.919971 | 159.905264 | 3.60884E-06 | 0.005481538 |
| 1518.959971 | 166.379381 | 3.75495E-06 | 0.00570362  |

|             |            |             |             |
|-------------|------------|-------------|-------------|
| 1518.999971 | 177.969106 | 4.01651E-06 | 0.006101086 |
| 1519.039971 | 188.753073 | 4.25989E-06 | 0.006470949 |
| 1519.079971 | 182.577836 | 4.12053E-06 | 0.006259411 |
| 1519.119971 | 190.271057 | 4.29415E-06 | 0.006523333 |
| 1519.159971 | 208.032972 | 4.69501E-06 | 0.007132478 |
| 1519.199971 | 224.536833 | 5.06748E-06 | 0.007698521 |
| 1519.239971 | 240.477531 | 5.42724E-06 | 0.008245284 |
| 1519.279971 | 242.744593 | 5.47841E-06 | 0.008323235 |
| 1519.319971 | 234.682329 | 5.29645E-06 | 0.008047007 |
| 1519.359971 | 260.970699 | 5.88975E-06 | 0.008948643 |
| 1519.399971 | 262.997697 | 5.93549E-06 | 0.009018386 |
| 1519.439971 | 233.227325 | 5.26362E-06 | 0.007997748 |
| 1519.479971 | 205.477671 | 4.63734E-06 | 0.007046353 |
| 1519.519971 | 169.221958 | 3.8191E-06  | 0.005803205 |
| 1519.559971 | 146.488527 | 3.30604E-06 | 0.005023729 |
| 1519.599971 | 144.955233 | 3.27144E-06 | 0.004971277 |
| 1519.639971 | 149.87427  | 3.38245E-06 | 0.005140112 |
| 1519.679971 | 142.941633 | 3.22599E-06 | 0.004902478 |
| 1519.719971 | 131.255644 | 2.96226E-06 | 0.004501801 |
| 1519.759971 | 129.855246 | 2.93065E-06 | 0.004453888 |
| 1519.799971 | 152.969004 | 3.4523E-06  | 0.005246801 |
| 1519.83997  | 173.814157 | 3.92274E-06 | 0.005961942 |
| 1519.87997  | 170.534422 | 3.84872E-06 | 0.005849599 |
| 1519.91997  | 174.527343 | 3.93884E-06 | 0.00598672  |
| 1519.95997  | 172.861289 | 3.90124E-06 | 0.005929726 |
| 1519.99997  | 167.513161 | 3.78054E-06 | 0.005746419 |
| 1520.03997  | 167.540414 | 3.78115E-06 | 0.005747505 |
| 1520.07997  | 173.869536 | 3.92399E-06 | 0.005964784 |
| 1520.11997  | 186.604801 | 4.21141E-06 | 0.006401849 |
| 1520.15997  | 198.37621  | 4.47707E-06 | 0.00680587  |
| 1520.19997  | 207.717029 | 4.68788E-06 | 0.007126521 |
| 1520.23997  | 217.222608 | 4.90241E-06 | 0.007452842 |
| 1520.27997  | 211.980789 | 4.78411E-06 | 0.007273188 |
| 1520.31997  | 215.040432 | 4.85316E-06 | 0.007378361 |
| 1520.35997  | 215.465336 | 4.86275E-06 | 0.007393134 |
| 1520.39997  | 218.075529 | 4.92166E-06 | 0.007482893 |
| 1520.43997  | 214.620303 | 4.84368E-06 | 0.007364527 |
| 1520.47997  | 199.455267 | 4.50143E-06 | 0.00684433  |
| 1520.51997  | 193.590088 | 4.36906E-06 | 0.006643241 |
| 1520.55997  | 180.988275 | 4.08465E-06 | 0.00621096  |
| 1520.59997  | 149.676188 | 3.37798E-06 | 0.005136561 |
| 1520.63997  | 140.149327 | 3.16298E-06 | 0.004809746 |
| 1520.67997  | 158.092225 | 3.56792E-06 | 0.005425666 |
| 1520.71997  | 172.336471 | 3.88939E-06 | 0.005914679 |
| 1520.75997  | 178.867457 | 4.03679E-06 | 0.006138988 |
| 1520.79997  | 174.852041 | 3.94617E-06 | 0.006001331 |

|            |            |             |             |
|------------|------------|-------------|-------------|
| 1520.83997 | 165.02888  | 3.72447E-06 | 0.005664326 |
| 1520.87997 | 155.017826 | 3.49854E-06 | 0.005320854 |
| 1520.91997 | 150.965582 | 3.40708E-06 | 0.0051819   |
| 1520.95997 | 150.487307 | 3.39629E-06 | 0.005165619 |
| 1520.99997 | 150.810056 | 3.40357E-06 | 0.005176834 |
| 1521.03997 | 150.975408 | 3.4073E-06  | 0.005182647 |
| 1521.07997 | 170.014325 | 3.83699E-06 | 0.005836363 |
| 1521.11997 | 197.236318 | 4.45135E-06 | 0.006771036 |
| 1521.15997 | 219.949835 | 4.96396E-06 | 0.007550979 |
| 1521.19997 | 208.948127 | 4.71567E-06 | 0.007173474 |
| 1521.23997 | 181.744778 | 4.10173E-06 | 0.00623971  |
| 1521.27997 | 189.491648 | 4.27656E-06 | 0.006505849 |
| 1521.31997 | 224.17667  | 5.05936E-06 | 0.007696898 |
| 1521.35997 | 249.110736 | 5.62208E-06 | 0.008553211 |
| 1521.39997 | 271.140517 | 6.11926E-06 | 0.009309848 |
| 1521.43997 | 245.512674 | 5.54088E-06 | 0.008430115 |
| 1521.47997 | 210.601836 | 4.75299E-06 | 0.007231579 |
| 1521.51997 | 204.125067 | 4.60682E-06 | 0.007009366 |
| 1521.55997 | 173.816888 | 3.92281E-06 | 0.005968783 |
| 1521.59997 | 152.309659 | 3.43742E-06 | 0.005230373 |
| 1521.63997 | 161.523377 | 3.64536E-06 | 0.005546922 |
| 1521.67997 | 154.901093 | 3.4959E-06  | 0.005319644 |
| 1521.71997 | 143.369149 | 3.23564E-06 | 0.004923741 |
| 1521.75997 | 157.140454 | 3.54644E-06 | 0.005396832 |
| 1521.79997 | 167.764184 | 3.7862E-06  | 0.005761845 |
| 1521.83997 | 159.100972 | 3.59069E-06 | 0.005464451 |
| 1521.87997 | 159.392483 | 3.59727E-06 | 0.005474608 |
| 1521.91997 | 162.922455 | 3.67693E-06 | 0.005595998 |
| 1521.95997 | 172.359457 | 3.88991E-06 | 0.005920292 |
| 1521.99997 | 182.631601 | 4.12174E-06 | 0.006273289 |
| 1522.03997 | 205.460953 | 4.63697E-06 | 0.00705765  |
| 1522.07997 | 213.292556 | 4.81372E-06 | 0.007326861 |
| 1522.11997 | 188.309973 | 4.24989E-06 | 0.006468848 |
| 1522.15997 | 176.044113 | 3.97307E-06 | 0.006047649 |
| 1522.19997 | 175.129819 | 3.95244E-06 | 0.006016398 |
| 1522.23997 | 188.648579 | 4.25754E-06 | 0.006480991 |
| 1522.27997 | 198.714981 | 4.48472E-06 | 0.006827    |
| 1522.31997 | 198.918979 | 4.48932E-06 | 0.006834188 |
| 1522.35997 | 207.112574 | 4.67424E-06 | 0.007115879 |
| 1522.39997 | 213.810698 | 4.82541E-06 | 0.007346203 |
| 1522.43997 | 199.082446 | 4.49301E-06 | 0.006840343 |
| 1522.47997 | 181.408011 | 4.09413E-06 | 0.006233225 |
| 1522.51997 | 183.214954 | 4.13491E-06 | 0.006295477 |
| 1522.55997 | 175.155694 | 3.95302E-06 | 0.00601871  |
| 1522.59997 | 181.722517 | 4.10122E-06 | 0.006244524 |
| 1522.63997 | 177.888701 | 4.0147E-06  | 0.006112943 |

|            |            |             |             |
|------------|------------|-------------|-------------|
| 1522.67997 | 167.697266 | 3.78469E-06 | 0.005762877 |
| 1522.71997 | 169.575932 | 3.82709E-06 | 0.00582759  |
| 1522.75997 | 163.948137 | 3.70008E-06 | 0.005634335 |
| 1522.79997 | 175.049898 | 3.95063E-06 | 0.006016023 |
| 1522.83997 | 196.886634 | 4.44346E-06 | 0.006766674 |
| 1522.87997 | 186.578585 | 4.21082E-06 | 0.006412572 |
| 1522.91997 | 171.776906 | 3.87677E-06 | 0.005904004 |
| 1522.95997 | 165.175021 | 3.72777E-06 | 0.005677245 |
| 1522.99997 | 164.160066 | 3.70486E-06 | 0.005642508 |
| 1523.03997 | 168.670061 | 3.80665E-06 | 0.005797678 |
| 1523.07997 | 188.481864 | 4.25377E-06 | 0.006478837 |
| 1523.11997 | 195.767925 | 4.41821E-06 | 0.006729463 |
| 1523.15997 | 190.159913 | 4.29164E-06 | 0.006536861 |
| 1523.19997 | 187.503409 | 4.23169E-06 | 0.006445711 |
| 1523.23997 | 197.478337 | 4.45681E-06 | 0.006788793 |
| 1523.27997 | 221.749942 | 5.00459E-06 | 0.007623388 |
| 1523.31997 | 225.123727 | 5.08073E-06 | 0.007739576 |
| 1523.35997 | 207.585403 | 4.68491E-06 | 0.00713681  |
| 1523.39997 | 195.836612 | 4.41976E-06 | 0.006733062 |
| 1523.43997 | 170.899424 | 3.85696E-06 | 0.00587585  |
| 1523.47997 | 158.659003 | 3.58071E-06 | 0.005455144 |
| 1523.51997 | 167.400369 | 3.77799E-06 | 0.005755848 |
| 1523.55997 | 167.747587 | 3.78583E-06 | 0.005767938 |
| 1523.59997 | 159.640331 | 3.60286E-06 | 0.005489317 |
| 1523.63997 | 144.129191 | 3.2528E-06  | 0.004956089 |
| 1523.67997 | 148.409592 | 3.3494E-06  | 0.00510341  |
| 1523.71997 | 158.091834 | 3.56791E-06 | 0.0054365   |
| 1523.75997 | 170.987307 | 3.85895E-06 | 0.005880106 |
| 1523.79997 | 172.895829 | 3.90202E-06 | 0.005945895 |
| 1523.83997 | 179.774265 | 4.05725E-06 | 0.006182607 |
| 1523.87997 | 173.170922 | 3.90823E-06 | 0.005955668 |
| 1523.91997 | 150.948281 | 3.40669E-06 | 0.005191527 |
| 1523.95997 | 141.019674 | 3.18262E-06 | 0.004850182 |
| 1523.99997 | 131.110593 | 2.95898E-06 | 0.004509491 |
| 1524.03997 | 141.274472 | 3.18837E-06 | 0.0048592   |
| 1524.07997 | 176.230883 | 3.97729E-06 | 0.006061701 |
| 1524.11997 | 183.965344 | 4.15184E-06 | 0.006327905 |
| 1524.15997 | 173.895117 | 3.92457E-06 | 0.005981673 |
| 1524.19997 | 178.25995  | 4.02308E-06 | 0.006131977 |
| 1524.23997 | 201.541071 | 4.5485E-06  | 0.006933007 |
| 1524.27997 | 219.83432  | 4.96135E-06 | 0.007562493 |
| 1524.31997 | 222.870637 | 5.02988E-06 | 0.007667146 |
| 1524.35997 | 217.368328 | 4.9057E-06  | 0.007478053 |
| 1524.39997 | 203.103743 | 4.58377E-06 | 0.006987497 |
| 1524.43997 | 191.827716 | 4.32928E-06 | 0.006599734 |
| 1524.47997 | 186.298908 | 4.20451E-06 | 0.006409686 |

|            |            |             |             |
|------------|------------|-------------|-------------|
| 1524.51997 | 208.497184 | 4.70549E-06 | 0.007173615 |
| 1524.55997 | 204.289348 | 4.61053E-06 | 0.007029023 |
| 1524.59997 | 169.089135 | 3.81611E-06 | 0.005818035 |
| 1524.63997 | 163.163545 | 3.68237E-06 | 0.005614294 |
| 1524.67997 | 182.374764 | 4.11594E-06 | 0.006275498 |
| 1524.71997 | 186.624634 | 4.21186E-06 | 0.006421904 |
| 1524.75997 | 176.128084 | 3.97497E-06 | 0.006060868 |
| 1524.79997 | 184.860632 | 4.17205E-06 | 0.006361537 |
| 1524.83997 | 209.331312 | 4.72432E-06 | 0.007203826 |
| 1524.87997 | 199.409192 | 4.50039E-06 | 0.006862551 |
| 1524.91997 | 152.9723   | 3.45237E-06 | 0.005264591 |
| 1524.95997 | 124.469593 | 2.80911E-06 | 0.004283773 |
| 1524.99997 | 121.131909 | 2.73378E-06 | 0.004169012 |
| 1525.03997 | 134.759324 | 3.04133E-06 | 0.00463815  |
| 1525.07997 | 157.929599 | 3.56425E-06 | 0.005435768 |
| 1525.11997 | 159.242839 | 3.59389E-06 | 0.005481112 |
| 1525.15997 | 168.88026  | 3.81139E-06 | 0.005812983 |
| 1525.19997 | 183.950124 | 4.1515E-06  | 0.006331865 |
| 1525.23997 | 208.845974 | 4.71336E-06 | 0.007189009 |
| 1525.27997 | 220.487758 | 4.9761E-06  | 0.007589948 |
| 1525.31997 | 202.147055 | 4.56218E-06 | 0.00695878  |
| 1525.35997 | 203.484333 | 4.59236E-06 | 0.007004999 |
| 1525.39997 | 213.404828 | 4.81625E-06 | 0.007346707 |
| 1525.43997 | 212.319112 | 4.79175E-06 | 0.007309522 |
| 1525.47997 | 186.018566 | 4.19818E-06 | 0.006404239 |
| 1525.51997 | 180.477753 | 4.07313E-06 | 0.006213643 |
| 1525.55997 | 179.192072 | 4.04412E-06 | 0.006169541 |
| 1525.59997 | 154.126223 | 3.47841E-06 | 0.005306669 |
| 1525.63997 | 122.042375 | 2.75433E-06 | 0.00420211  |
| 1525.67997 | 120.925287 | 2.72912E-06 | 0.004163757 |
| 1525.71997 | 156.966898 | 3.54252E-06 | 0.0054049   |
| 1525.75997 | 177.654726 | 4.00942E-06 | 0.006117412 |
| 1525.79997 | 169.796326 | 3.83207E-06 | 0.005846967 |
| 1525.83997 | 161.966729 | 3.65536E-06 | 0.0055775   |
| 1525.87997 | 166.731161 | 3.76289E-06 | 0.005741719 |
| 1525.91997 | 170.626267 | 3.8508E-06  | 0.005876008 |
| 1525.95997 | 180.942222 | 4.08361E-06 | 0.006231431 |
| 1525.99997 | 179.790916 | 4.05763E-06 | 0.006191944 |
| 1526.03997 | 173.369932 | 3.91272E-06 | 0.005970964 |
| 1526.07997 | 174.60648  | 3.94063E-06 | 0.006013709 |
| 1526.11997 | 158.696783 | 3.58157E-06 | 0.005465898 |
| 1526.15997 | 148.823457 | 3.35874E-06 | 0.005125972 |
| 1526.19997 | 171.489442 | 3.87028E-06 | 0.005906818 |
| 1526.23997 | 180.458451 | 4.0727E-06  | 0.006215911 |
| 1526.27997 | 199.720243 | 4.50741E-06 | 0.006879566 |
| 1526.31997 | 206.253344 | 4.65485E-06 | 0.007104792 |

|            |            |             |             |
|------------|------------|-------------|-------------|
| 1526.35997 | 202.507185 | 4.57031E-06 | 0.006975931 |
| 1526.39997 | 199.0398   | 4.49205E-06 | 0.006856667 |
| 1526.43997 | 204.189522 | 4.60827E-06 | 0.007034252 |
| 1526.47997 | 181.141287 | 4.08811E-06 | 0.006240413 |
| 1526.51997 | 150.177236 | 3.38929E-06 | 0.00517382  |
| 1526.55997 | 139.248902 | 3.14265E-06 | 0.004797449 |
| 1526.59997 | 142.243707 | 3.21024E-06 | 0.004900756 |
| 1526.63997 | 147.09463  | 3.31972E-06 | 0.005068019 |
| 1526.67997 | 142.983076 | 3.22693E-06 | 0.004926488 |
| 1526.71997 | 171.865439 | 3.87876E-06 | 0.005921786 |
| 1526.75997 | 178.301712 | 4.02402E-06 | 0.006143715 |
| 1526.79997 | 144.047562 | 3.25095E-06 | 0.004963555 |
| 1526.83997 | 137.54568  | 3.10421E-06 | 0.004739639 |
| 1526.87997 | 164.324379 | 3.70857E-06 | 0.005662545 |
| 1526.91997 | 170.777276 | 3.85421E-06 | 0.005885063 |
| 1526.95997 | 148.985157 | 3.36239E-06 | 0.005134231 |
| 1526.99997 | 134.522773 | 3.03599E-06 | 0.004635959 |
| 1527.03997 | 156.730633 | 3.53719E-06 | 0.005401434 |
| 1527.07997 | 184.06244  | 4.15403E-06 | 0.00634354  |
| 1527.11997 | 179.958527 | 4.06141E-06 | 0.006202265 |
| 1527.15997 | 170.638478 | 3.85107E-06 | 0.005881204 |
| 1527.19997 | 179.858246 | 4.05915E-06 | 0.006199134 |
| 1527.23997 | 180.055853 | 4.06361E-06 | 0.006206107 |
| 1527.27997 | 176.397379 | 3.98104E-06 | 0.006080167 |
| 1527.31997 | 179.422193 | 4.04931E-06 | 0.00618459  |
| 1527.35997 | 193.022974 | 4.35626E-06 | 0.006653577 |
| 1527.39997 | 209.248472 | 4.72245E-06 | 0.007213065 |
| 1527.43997 | 189.370591 | 4.27383E-06 | 0.006528019 |
| 1527.47997 | 173.463966 | 3.91484E-06 | 0.00597984  |
| 1527.51997 | 158.875552 | 3.5856E-06  | 0.005477075 |
| 1527.55997 | 140.717161 | 3.17579E-06 | 0.00485121  |
| 1527.59997 | 145.754739 | 3.28948E-06 | 0.005025012 |
| 1527.63997 | 161.665128 | 3.64856E-06 | 0.005573681 |
| 1527.67997 | 144.653108 | 3.26462E-06 | 0.004987293 |
| 1527.71997 | 128.761416 | 2.90597E-06 | 0.004439502 |
| 1527.75997 | 151.252885 | 3.41357E-06 | 0.005215111 |
| 1527.79997 | 172.31724  | 3.88896E-06 | 0.005941553 |
| 1527.83997 | 155.645672 | 3.51271E-06 | 0.005366853 |
| 1527.87997 | 153.86957  | 3.47262E-06 | 0.005305749 |
| 1527.91997 | 165.512551 | 3.73539E-06 | 0.005707374 |
| 1527.95997 | 163.281119 | 3.68503E-06 | 0.005630574 |
| 1527.99997 | 148.41271  | 3.34947E-06 | 0.005117987 |
| 1528.03997 | 135.82496  | 3.06538E-06 | 0.004684023 |
| 1528.07997 | 160.163682 | 3.61467E-06 | 0.005523507 |
| 1528.11997 | 183.268261 | 4.13611E-06 | 0.006320471 |
| 1528.15997 | 181.171263 | 4.08878E-06 | 0.006248315 |

|            |            |             |             |
|------------|------------|-------------|-------------|
| 1528.19997 | 183.954835 | 4.1516E-06  | 0.006344482 |
| 1528.23997 | 200.169553 | 4.51755E-06 | 0.006903897 |
| 1528.27997 | 204.131466 | 4.60696E-06 | 0.007040729 |
| 1528.31997 | 206.835146 | 4.66798E-06 | 0.007134169 |
| 1528.35997 | 205.612603 | 4.64039E-06 | 0.007092186 |
| 1528.39997 | 193.554285 | 4.36825E-06 | 0.006676434 |
| 1528.43997 | 194.34745  | 4.38615E-06 | 0.006703969 |
| 1528.47997 | 195.626979 | 4.41503E-06 | 0.006748283 |
| 1528.51997 | 167.223807 | 3.77401E-06 | 0.005768647 |
| 1528.55997 | 161.892374 | 3.65369E-06 | 0.005584877 |
| 1528.59997 | 167.470967 | 3.77959E-06 | 0.005777476 |
| 1528.63997 | 161.373193 | 3.64197E-06 | 0.005567258 |
| 1528.67997 | 167.270496 | 3.77506E-06 | 0.005770862 |
| 1528.71997 | 172.80226  | 3.89991E-06 | 0.005961865 |
| 1528.75997 | 180.255996 | 4.06813E-06 | 0.006219189 |
| 1528.79997 | 173.285766 | 3.91082E-06 | 0.005978859 |
| 1528.83997 | 151.491894 | 3.41896E-06 | 0.005227044 |
| 1528.87997 | 162.065477 | 3.65759E-06 | 0.005592019 |
| 1528.91997 | 178.052974 | 4.01841E-06 | 0.006143824 |
| 1528.95997 | 170.428593 | 3.84634E-06 | 0.005880894 |
| 1528.99997 | 154.892411 | 3.49571E-06 | 0.005344934 |
| 1529.03997 | 155.583178 | 3.5113E-06  | 0.005368911 |
| 1529.07997 | 179.844097 | 4.05883E-06 | 0.006206277 |
| 1529.11997 | 195.668822 | 4.41597E-06 | 0.006752552 |
| 1529.15997 | 194.479391 | 4.38913E-06 | 0.00671168  |
| 1529.19997 | 176.681696 | 3.98746E-06 | 0.006097623 |
| 1529.23997 | 170.0257   | 3.83724E-06 | 0.005868066 |
| 1529.27997 | 186.185523 | 4.20195E-06 | 0.006425955 |
| 1529.31997 | 200.721205 | 4.53E-06    | 0.006927816 |
| 1529.35997 | 207.319133 | 4.6789E-06  | 0.007155729 |
| 1529.39997 | 186.864339 | 4.21727E-06 | 0.006449889 |
| 1529.43997 | 190.012819 | 4.28832E-06 | 0.006558735 |
| 1529.47997 | 188.061216 | 4.24428E-06 | 0.006491541 |
| 1529.51997 | 165.555301 | 3.73635E-06 | 0.005714826 |
| 1529.55997 | 155.751564 | 3.5151E-06  | 0.00537655  |
| 1529.59997 | 156.589182 | 3.534E-06   | 0.005405606 |
| 1529.63997 | 151.517033 | 3.41953E-06 | 0.005230647 |
| 1529.67997 | 149.909379 | 3.38325E-06 | 0.005175283 |
| 1529.71997 | 149.000783 | 3.36274E-06 | 0.005144051 |
| 1529.75997 | 140.213112 | 3.16441E-06 | 0.004840795 |
| 1529.79997 | 146.10129  | 3.2973E-06  | 0.005044213 |
| 1529.83997 | 150.612667 | 3.39912E-06 | 0.005200107 |
| 1529.87997 | 152.341348 | 3.43813E-06 | 0.005259929 |
| 1529.91997 | 164.106487 | 3.70365E-06 | 0.005666295 |
| 1529.95997 | 189.383122 | 4.27411E-06 | 0.006539222 |
| 1529.99997 | 191.978671 | 4.33269E-06 | 0.006629017 |

|            |            |             |             |
|------------|------------|-------------|-------------|
| 1530.03997 | 192.998922 | 4.35572E-06 | 0.006664421 |
| 1530.07997 | 180.578498 | 4.07541E-06 | 0.006235696 |
| 1530.11997 | 156.622106 | 3.53474E-06 | 0.005408581 |
| 1530.15997 | 162.232489 | 3.66136E-06 | 0.005602469 |
| 1530.19997 | 163.148522 | 3.68203E-06 | 0.00563425  |
| 1530.23997 | 161.950115 | 3.65499E-06 | 0.00559301  |
| 1530.27997 | 165.017604 | 3.72422E-06 | 0.005699095 |
| 1530.31997 | 176.629813 | 3.98629E-06 | 0.006100297 |
| 1530.35997 | 180.17079  | 4.0662E-06  | 0.006222755 |
| 1530.39997 | 188.523142 | 4.2547E-06  | 0.0065114   |
| 1530.43997 | 177.051713 | 3.99581E-06 | 0.006115348 |
| 1530.47997 | 144.520626 | 3.26163E-06 | 0.004991858 |
| 1530.51997 | 150.76596  | 3.40258E-06 | 0.005207713 |
| 1530.55997 | 163.61319  | 3.69252E-06 | 0.005651626 |
| 1530.59997 | 152.912622 | 3.45102E-06 | 0.005282139 |
| 1530.63997 | 146.459192 | 3.30538E-06 | 0.005059347 |
| 1530.67997 | 153.340671 | 3.46069E-06 | 0.005297202 |
| 1530.71997 | 150.320789 | 3.39253E-06 | 0.005193015 |
| 1530.75997 | 169.821087 | 3.83263E-06 | 0.00586683  |
| 1530.79997 | 180.797352 | 4.08034E-06 | 0.006246191 |
| 1530.83997 | 156.430261 | 3.53041E-06 | 0.005404497 |
| 1530.87997 | 144.543661 | 3.26215E-06 | 0.004993959 |
| 1530.91997 | 155.756358 | 3.5152E-06  | 0.005381496 |
| 1530.95997 | 174.830296 | 3.94568E-06 | 0.006040672 |
| 1530.99997 | 186.24337  | 4.20325E-06 | 0.006435181 |
| 1531.03997 | 173.826277 | 3.92302E-06 | 0.006006296 |
| 1531.07997 | 171.101536 | 3.86152E-06 | 0.005912301 |
| 1531.11997 | 188.907078 | 4.26337E-06 | 0.00652773  |
| 1531.15997 | 199.54231  | 4.50339E-06 | 0.006895414 |
| 1531.19997 | 188.212966 | 4.2477E-06  | 0.006504085 |
| 1531.23997 | 175.49145  | 3.9606E-06  | 0.006064625 |
| 1531.27997 | 173.47909  | 3.91518E-06 | 0.005995239 |
| 1531.31997 | 181.687146 | 4.10043E-06 | 0.006279064 |
| 1531.35997 | 183.786365 | 4.1478E-06  | 0.006351778 |
| 1531.39997 | 206.249317 | 4.65476E-06 | 0.007128299 |
| 1531.43997 | 201.875634 | 4.55605E-06 | 0.00697732  |
| 1531.47997 | 175.80581  | 3.96769E-06 | 0.006076441 |
| 1531.51997 | 164.128532 | 3.70415E-06 | 0.005672983 |
| 1531.55997 | 155.943587 | 3.51943E-06 | 0.005390217 |
| 1531.59997 | 160.270811 | 3.61709E-06 | 0.005539933 |
| 1531.63997 | 161.694044 | 3.64921E-06 | 0.005589275 |
| 1531.67997 | 161.434186 | 3.64334E-06 | 0.005580438 |
| 1531.71997 | 159.45395  | 3.59865E-06 | 0.00551213  |
| 1531.75997 | 156.904227 | 3.54111E-06 | 0.00542413  |
| 1531.79997 | 164.209524 | 3.70598E-06 | 0.00567682  |
| 1531.83997 | 173.071284 | 3.90598E-06 | 0.005983333 |



|            |            |             |             |
|------------|------------|-------------|-------------|
| 1531.87997 | 169.010451 | 3.81433E-06 | 0.005843096 |
| 1531.91997 | 171.031125 | 3.85993E-06 | 0.00591311  |
| 1531.95997 | 169.361351 | 3.82225E-06 | 0.005855534 |
| 1531.99997 | 157.354432 | 3.55127E-06 | 0.005440546 |
| 1532.03997 | 162.104971 | 3.65848E-06 | 0.005604943 |
| 1532.07997 | 168.960876 | 3.81321E-06 | 0.005842145 |
| 1532.11997 | 172.953663 | 3.90332E-06 | 0.00598036  |
| 1532.15997 | 170.023523 | 3.83719E-06 | 0.005879195 |
| 1532.19997 | 203.506321 | 4.59285E-06 | 0.007037171 |
| 1532.23997 | 216.977734 | 4.89689E-06 | 0.007503203 |
| 1532.27997 | 204.403796 | 4.61311E-06 | 0.007068574 |
| 1532.31997 | 201.143561 | 4.53953E-06 | 0.006956012 |
| 1532.35997 | 191.518756 | 4.32231E-06 | 0.006623337 |
| 1532.39997 | 167.851789 | 3.78818E-06 | 0.005805009 |
| 1532.43997 | 151.6261   | 3.42199E-06 | 0.005243994 |
| 1532.47997 | 162.209786 | 3.66085E-06 | 0.005610178 |
| 1532.51997 | 146.104608 | 3.29738E-06 | 0.005053297 |
| 1532.55997 | 125.844957 | 2.84015E-06 | 0.004352693 |
| 1532.59997 | 128.18314  | 2.89291E-06 | 0.004433681 |
| 1532.63997 | 149.730765 | 3.37921E-06 | 0.00517912  |
| 1532.67997 | 173.060866 | 3.90574E-06 | 0.005986254 |
| 1532.71997 | 175.158736 | 3.95309E-06 | 0.006058978 |
| 1532.75997 | 169.581815 | 3.82723E-06 | 0.005866218 |
| 1532.79997 | 168.885912 | 3.81152E-06 | 0.005842297 |
| 1532.83997 | 168.03418  | 3.7923E-06  | 0.005812985 |
| 1532.87997 | 164.435509 | 3.71108E-06 | 0.005688641 |
| 1532.91997 | 162.602081 | 3.6697E-06  | 0.00562536  |
| 1532.95997 | 170.503454 | 3.84803E-06 | 0.005898869 |
| 1532.99997 | 183.084647 | 4.13197E-06 | 0.006334303 |
| 1533.03997 | 200.98433  | 4.53594E-06 | 0.006953772 |
| 1533.07997 | 211.82974  | 4.7807E-06  | 0.007329199 |
| 1533.11997 | 202.92615  | 4.57976E-06 | 0.007021322 |
| 1533.15997 | 197.711945 | 4.46208E-06 | 0.006841087 |
| 1533.19997 | 190.663015 | 4.303E-06   | 0.006597357 |
| 1533.23997 | 192.377887 | 4.3417E-06  | 0.006656869 |
| 1533.27997 | 203.743252 | 4.5982E-06  | 0.00705033  |
| 1533.31997 | 208.929088 | 4.71524E-06 | 0.007229969 |
| 1533.35997 | 203.505508 | 4.59284E-06 | 0.007042471 |
| 1533.39997 | 214.317606 | 4.83685E-06 | 0.007416825 |
| 1533.43997 | 220.343606 | 4.97285E-06 | 0.007625564 |
| 1533.47997 | 192.50293  | 4.34452E-06 | 0.006662239 |
| 1533.51997 | 177.342083 | 4.00236E-06 | 0.006137705 |
| 1533.55997 | 182.715436 | 4.12363E-06 | 0.006323838 |
| 1533.59997 | 172.37851  | 3.89034E-06 | 0.00596623  |
| 1533.63997 | 157.845144 | 3.56235E-06 | 0.005463355 |
| 1533.67997 | 152.453098 | 3.44065E-06 | 0.005276862 |

|            |            |             |             |
|------------|------------|-------------|-------------|
| 1533.71997 | 148.93743  | 3.36131E-06 | 0.005155309 |
| 1533.75997 | 156.172705 | 3.5246E-06  | 0.005405891 |
| 1533.79997 | 176.43631  | 3.98192E-06 | 0.006107471 |
| 1533.83997 | 160.91696  | 3.63167E-06 | 0.005570403 |
| 1533.87997 | 153.874229 | 3.47273E-06 | 0.005326746 |
| 1533.91997 | 165.624899 | 3.73792E-06 | 0.005733675 |
| 1533.95997 | 161.569178 | 3.64639E-06 | 0.005593418 |
| 1533.99997 | 178.704387 | 4.03311E-06 | 0.006186789 |
| 1534.03997 | 197.298182 | 4.45275E-06 | 0.006830689 |
| 1534.07997 | 198.478925 | 4.47939E-06 | 0.006871747 |
| 1534.11997 | 178.925062 | 4.03809E-06 | 0.006194914 |
| 1534.15997 | 187.962667 | 4.24206E-06 | 0.006507992 |
| 1534.19997 | 203.08023  | 4.58324E-06 | 0.007031603 |
| 1534.23997 | 207.973121 | 4.69366E-06 | 0.007201206 |
| 1534.27997 | 211.650711 | 4.77666E-06 | 0.007328736 |
| 1534.31997 | 215.685818 | 4.86773E-06 | 0.007468653 |
| 1534.35997 | 211.768391 | 4.77932E-06 | 0.007333194 |
| 1534.39997 | 192.703653 | 4.34905E-06 | 0.006673187 |
| 1534.43997 | 165.618209 | 3.73777E-06 | 0.005735387 |
| 1534.47997 | 148.181932 | 3.34426E-06 | 0.0051317   |
| 1534.51997 | 140.744194 | 3.1764E-06  | 0.00487425  |
| 1534.55997 | 141.019041 | 3.1826E-06  | 0.004883896 |
| 1534.59997 | 146.733414 | 3.31157E-06 | 0.005081933 |
| 1534.63997 | 156.616938 | 3.53463E-06 | 0.005424379 |
| 1534.67997 | 159.156899 | 3.59195E-06 | 0.005512493 |
| 1534.71997 | 156.648919 | 3.53535E-06 | 0.005425769 |
| 1534.75997 | 155.803538 | 3.51627E-06 | 0.005396629 |
| 1534.79997 | 147.704036 | 3.33347E-06 | 0.005116216 |
| 1534.83997 | 141.639216 | 3.1966E-06  | 0.004906269 |
| 1534.87997 | 146.306457 | 3.30193E-06 | 0.005068071 |
| 1534.91997 | 139.093728 | 3.13915E-06 | 0.004818347 |
| 1534.95997 | 134.289829 | 3.03073E-06 | 0.004652056 |
| 1534.99997 | 165.615922 | 3.73772E-06 | 0.005737401 |
| 1535.03997 | 184.940966 | 4.17386E-06 | 0.006407042 |
| 1535.07997 | 194.278692 | 4.3846E-06  | 0.006730711 |
| 1535.11997 | 184.999914 | 4.17519E-06 | 0.006409418 |
| 1535.15997 | 171.396584 | 3.86818E-06 | 0.005938278 |
| 1535.19997 | 175.634195 | 3.96382E-06 | 0.006085255 |
| 1535.23997 | 195.362447 | 4.40906E-06 | 0.006768963 |
| 1535.27997 | 222.144661 | 5.0135E-06  | 0.007697119 |
| 1535.31997 | 209.627979 | 4.73101E-06 | 0.007263616 |
| 1535.35997 | 185.970411 | 4.19709E-06 | 0.006444049 |
| 1535.39997 | 192.937263 | 4.35433E-06 | 0.006685631 |
| 1535.43997 | 184.518031 | 4.16431E-06 | 0.006394056 |
| 1535.47997 | 150.990192 | 3.40764E-06 | 0.00523236  |
| 1535.51997 | 134.045622 | 3.02522E-06 | 0.00464529  |

|            |            |             |             |
|------------|------------|-------------|-------------|
| 1535.55997 | 152.649945 | 3.4451E-06  | 0.005290152 |
| 1535.59997 | 177.118032 | 3.99731E-06 | 0.006138265 |
| 1535.63997 | 183.543623 | 4.14232E-06 | 0.006361118 |
| 1535.67997 | 165.298041 | 3.73055E-06 | 0.005728926 |
| 1535.71997 | 161.222865 | 3.63858E-06 | 0.005587833 |
| 1535.75997 | 161.646128 | 3.64813E-06 | 0.005602649 |
| 1535.79997 | 174.853976 | 3.94621E-06 | 0.00606059  |
| 1535.83997 | 179.810458 | 4.05807E-06 | 0.006232549 |
| 1535.87997 | 182.313498 | 4.11456E-06 | 0.006319473 |
| 1535.91997 | 193.830176 | 4.37448E-06 | 0.006718847 |
| 1535.95997 | 194.141458 | 4.3815E-06  | 0.006729812 |
| 1535.99997 | 178.233253 | 4.02248E-06 | 0.006178523 |
| 1536.03997 | 168.722976 | 3.80784E-06 | 0.005848998 |
| 1536.07997 | 151.311218 | 3.41488E-06 | 0.005245534 |
| 1536.11997 | 164.237515 | 3.70661E-06 | 0.005693801 |
| 1536.15997 | 190.57326  | 4.30097E-06 | 0.006606983 |
| 1536.19997 | 195.260301 | 4.40675E-06 | 0.006769654 |
| 1536.23997 | 182.441726 | 4.11746E-06 | 0.0063254   |
| 1536.27997 | 182.37379  | 4.11592E-06 | 0.006323209 |
| 1536.31997 | 195.002941 | 4.40094E-06 | 0.006761259 |
| 1536.35997 | 209.404575 | 4.72597E-06 | 0.00726079  |
| 1536.39997 | 206.68418  | 4.66457E-06 | 0.007166651 |
| 1536.43997 | 193.567486 | 4.36855E-06 | 0.006712013 |
| 1536.47997 | 167.918809 | 3.78969E-06 | 0.005822788 |
| 1536.51997 | 171.491195 | 3.87032E-06 | 0.00594682  |
| 1536.55997 | 171.425335 | 3.86883E-06 | 0.005944691 |
| 1536.59997 | 169.18372  | 3.81824E-06 | 0.005867109 |
| 1536.63997 | 165.917239 | 3.74452E-06 | 0.005753981 |
| 1536.67997 | 156.768213 | 3.53804E-06 | 0.005436836 |
| 1536.71997 | 149.235214 | 3.36803E-06 | 0.00517572  |
| 1536.75997 | 159.162779 | 3.59208E-06 | 0.005520168 |
| 1536.79997 | 175.169967 | 3.95334E-06 | 0.006075496 |
| 1536.83997 | 179.207693 | 4.04447E-06 | 0.0062157   |
| 1536.87997 | 175.709819 | 3.96553E-06 | 0.006094537 |
| 1536.91997 | 178.616965 | 4.03114E-06 | 0.006195534 |
| 1536.95997 | 184.686399 | 4.16811E-06 | 0.006406226 |
| 1536.99997 | 166.656524 | 3.76121E-06 | 0.005780973 |
| 1537.03997 | 149.906721 | 3.38319E-06 | 0.005200092 |
| 1537.07997 | 161.778569 | 3.65112E-06 | 0.005612059 |
| 1537.11997 | 188.09764  | 4.2451E-06  | 0.006525231 |
| 1537.15997 | 213.971793 | 4.82905E-06 | 0.007423015 |
| 1537.19997 | 220.68941  | 4.98065E-06 | 0.007656259 |
| 1537.23997 | 201.932061 | 4.55733E-06 | 0.007005703 |
| 1537.27997 | 196.096577 | 4.42563E-06 | 0.006803427 |
| 1537.31997 | 195.170437 | 4.40472E-06 | 0.006771472 |
| 1537.35997 | 204.850485 | 4.62319E-06 | 0.007107507 |

|            |            |             |             |
|------------|------------|-------------|-------------|
| 1537.39997 | 200.495159 | 4.5249E-06  | 0.006956576 |
| 1537.43997 | 187.989789 | 4.24267E-06 | 0.006522847 |
| 1537.47997 | 179.568478 | 4.05261E-06 | 0.006230807 |
| 1537.51997 | 170.007861 | 3.83684E-06 | 0.005899219 |
| 1537.55997 | 169.050358 | 3.81523E-06 | 0.005866147 |
| 1537.59997 | 171.575926 | 3.87223E-06 | 0.00595394  |
| 1537.63997 | 168.966467 | 3.81334E-06 | 0.005863541 |
| 1537.67997 | 171.417451 | 3.86865E-06 | 0.00594875  |
| 1537.71997 | 189.707909 | 4.28144E-06 | 0.006583661 |
| 1537.75997 | 186.309049 | 4.20474E-06 | 0.006465874 |
| 1537.79997 | 168.036816 | 3.79236E-06 | 0.005831886 |
| 1537.83997 | 148.091105 | 3.34221E-06 | 0.005139784 |
| 1537.87997 | 135.823819 | 3.06535E-06 | 0.004714147 |
| 1537.91997 | 137.352803 | 3.09986E-06 | 0.004767339 |
| 1537.95997 | 147.882415 | 3.3375E-06  | 0.005132942 |
| 1537.99997 | 160.111154 | 3.61349E-06 | 0.005557541 |
| 1538.03997 | 150.844936 | 3.40436E-06 | 0.005236042 |
| 1538.07997 | 159.078442 | 3.59018E-06 | 0.005521982 |
| 1538.11997 | 164.183309 | 3.70539E-06 | 0.005699332 |
| 1538.15997 | 160.646733 | 3.62557E-06 | 0.005576711 |
| 1538.19997 | 168.359917 | 3.79965E-06 | 0.00584462  |
| 1538.23997 | 178.830701 | 4.03596E-06 | 0.006208275 |
| 1538.27997 | 175.967508 | 3.97134E-06 | 0.006109035 |
| 1538.31997 | 157.602957 | 3.55688E-06 | 0.005471618 |
| 1538.35997 | 165.982502 | 3.74599E-06 | 0.005762687 |
| 1538.39997 | 192.272547 | 4.33932E-06 | 0.006675615 |
| 1538.43997 | 178.760892 | 4.03438E-06 | 0.006206658 |
| 1538.47997 | 147.65104  | 3.33228E-06 | 0.005126643 |
| 1538.51997 | 145.488958 | 3.28348E-06 | 0.005051704 |
| 1538.55997 | 154.477086 | 3.48633E-06 | 0.005363932 |
| 1538.59997 | 147.578845 | 3.33065E-06 | 0.005124536 |
| 1538.63997 | 138.43099  | 3.12419E-06 | 0.004807011 |
| 1538.67997 | 157.306898 | 3.5502E-06  | 0.005462618 |
| 1538.71997 | 179.855476 | 4.05909E-06 | 0.006245799 |
| 1538.75997 | 190.593959 | 4.30144E-06 | 0.006618884 |
| 1538.79997 | 184.998988 | 4.17517E-06 | 0.006424751 |
| 1538.83997 | 181.329946 | 4.09236E-06 | 0.006297494 |
| 1538.87997 | 160.576946 | 3.624E-06   | 0.005576898 |
| 1538.91997 | 151.311854 | 3.4149E-06  | 0.005255254 |
| 1538.95997 | 166.660589 | 3.7613E-06  | 0.005788486 |
| 1538.99997 | 157.927786 | 3.56421E-06 | 0.005485319 |
| 1539.03997 | 156.255087 | 3.52646E-06 | 0.005427362 |
| 1539.07997 | 160.175681 | 3.61494E-06 | 0.005563685 |
| 1539.11997 | 156.54331  | 3.53296E-06 | 0.005437656 |
| 1539.15997 | 165.713576 | 3.73992E-06 | 0.005756342 |
| 1539.19997 | 188.815839 | 4.26131E-06 | 0.006559009 |

|            |            |             |             |
|------------|------------|-------------|-------------|
| 1539.23997 | 212.100716 | 4.78682E-06 | 0.007368061 |
| 1539.27997 | 229.761485 | 5.1854E-06  | 0.007981777 |
| 1539.31997 | 227.87094  | 5.14273E-06 | 0.007916307 |
| 1539.35997 | 215.828834 | 4.87096E-06 | 0.007498155 |
| 1539.39997 | 197.85178  | 4.46524E-06 | 0.006873789 |
| 1539.43997 | 193.381307 | 4.36435E-06 | 0.00671865  |
| 1539.47997 | 188.421113 | 4.2524E-06  | 0.006546488 |
| 1539.51997 | 164.25386  | 3.70698E-06 | 0.005706971 |
| 1539.55997 | 150.316291 | 3.39243E-06 | 0.005222848 |
| 1539.59997 | 130.907114 | 2.95439E-06 | 0.004548581 |
| 1539.63997 | 136.402706 | 3.07842E-06 | 0.004739657 |
| 1539.67997 | 159.882534 | 3.60833E-06 | 0.005555667 |
| 1539.71997 | 167.939735 | 3.79017E-06 | 0.005835794 |
| 1539.75997 | 174.115184 | 3.92954E-06 | 0.006050544 |
| 1539.79997 | 158.396952 | 3.5748E-06  | 0.005504475 |
| 1539.83997 | 143.749913 | 3.24424E-06 | 0.004995603 |
| 1539.87997 | 141.240661 | 3.1876E-06  | 0.004908529 |
| 1539.91997 | 128.81392  | 2.90715E-06 | 0.004476779 |
| 1539.95997 | 115.057282 | 2.59668E-06 | 0.003998787 |
| 1539.99997 | 98.775046  | 2.22922E-06 | 0.003432991 |
| 1540.03997 | 103.502571 | 2.33591E-06 | 0.003597393 |
| 1540.07997 | 129.000023 | 2.91135E-06 | 0.004483713 |
| 1540.11997 | 174.444647 | 3.93697E-06 | 0.00606341  |
| 1540.15997 | 228.10163  | 5.14794E-06 | 0.007928645 |
| 1540.19997 | 247.40092  | 5.58349E-06 | 0.008599698 |
| 1540.23997 | 216.218662 | 4.87975E-06 | 0.007515992 |
| 1540.27997 | 216.340155 | 4.8825E-06  | 0.007520411 |
| 1540.31997 | 229.394137 | 5.17711E-06 | 0.0079744   |
| 1540.35997 | 219.582856 | 4.95568E-06 | 0.00763353  |
| 1540.39997 | 176.905862 | 3.99252E-06 | 0.006150076 |
| 1540.43997 | 163.486996 | 3.68967E-06 | 0.005683721 |
| 1540.47997 | 175.656823 | 3.96433E-06 | 0.006106971 |
| 1540.51997 | 156.782576 | 3.53836E-06 | 0.005450921 |
| 1540.55997 | 159.825029 | 3.60703E-06 | 0.005556843 |
| 1540.59997 | 176.929948 | 3.99306E-06 | 0.006151712 |
| 1540.63997 | 179.862267 | 4.05924E-06 | 0.006253829 |
| 1540.67997 | 166.35064  | 3.7543E-06  | 0.005784178 |
| 1540.71997 | 159.484312 | 3.59934E-06 | 0.005545573 |
| 1540.75997 | 157.803659 | 3.56141E-06 | 0.005487276 |
| 1540.79997 | 154.006017 | 3.4757E-06  | 0.00535536  |
| 1540.83997 | 159.936083 | 3.60953E-06 | 0.005561715 |
| 1540.87997 | 165.132091 | 3.7268E-06  | 0.005742553 |
| 1540.91997 | 162.546287 | 3.66844E-06 | 0.005652778 |
| 1540.95997 | 169.772503 | 3.83153E-06 | 0.005904233 |
| 1540.99997 | 179.197248 | 4.04423E-06 | 0.006232162 |
| 1541.03997 | 166.776062 | 3.7639E-06  | 0.005800326 |

|            |            |             |             |
|------------|------------|-------------|-------------|
| 1541.07997 | 156.404837 | 3.52984E-06 | 0.005439765 |
| 1541.11997 | 166.258741 | 3.75223E-06 | 0.005782634 |
| 1541.15997 | 184.454323 | 4.16288E-06 | 0.00641566  |
| 1541.19997 | 207.039904 | 4.6726E-06  | 0.007201414 |
| 1541.23997 | 208.336434 | 4.70186E-06 | 0.007246699 |
| 1541.27997 | 197.939314 | 4.46721E-06 | 0.006885228 |
| 1541.31997 | 191.202734 | 4.31518E-06 | 0.006651072 |
| 1541.35997 | 183.536698 | 4.14217E-06 | 0.006384571 |
| 1541.39997 | 181.960283 | 4.10659E-06 | 0.006329898 |
| 1541.43997 | 176.710933 | 3.98812E-06 | 0.006147447 |
| 1541.47997 | 162.245076 | 3.66165E-06 | 0.005644353 |
| 1541.51997 | 155.642746 | 3.51264E-06 | 0.005414805 |
| 1541.55997 | 128.719554 | 2.90502E-06 | 0.004478264 |
| 1541.59997 | 106.817678 | 2.41073E-06 | 0.003716375 |
| 1541.63997 | 124.420215 | 2.80799E-06 | 0.004328911 |
| 1541.67997 | 130.234546 | 2.93921E-06 | 0.004531325 |
| 1541.71997 | 131.30162  | 2.96329E-06 | 0.004568571 |
| 1541.75997 | 140.03316  | 3.16035E-06 | 0.004872506 |
| 1541.79997 | 153.709977 | 3.46902E-06 | 0.005348535 |
| 1541.83997 | 170.211876 | 3.84144E-06 | 0.005922893 |
| 1541.87997 | 163.51143  | 3.69023E-06 | 0.005689884 |
| 1541.91997 | 150.882247 | 3.4052E-06  | 0.005250549 |
| 1541.95997 | 137.305275 | 3.09879E-06 | 0.004778208 |
| 1541.99997 | 121.700721 | 2.74662E-06 | 0.004235281 |
| 1542.03997 | 134.346016 | 3.032E-06   | 0.004675469 |
| 1542.07997 | 165.085115 | 3.72574E-06 | 0.005745391 |
| 1542.11997 | 181.969955 | 4.10681E-06 | 0.006333191 |
| 1542.15997 | 174.225602 | 3.93203E-06 | 0.006063818 |
| 1542.19997 | 181.951715 | 4.1064E-06  | 0.006332885 |
| 1542.23997 | 206.371836 | 4.65752E-06 | 0.007183021 |
| 1542.27997 | 199.153637 | 4.49462E-06 | 0.006931963 |
| 1542.31997 | 176.979306 | 3.99418E-06 | 0.006160298 |
| 1542.35997 | 159.686114 | 3.60389E-06 | 0.005558501 |
| 1542.39997 | 170.06409  | 3.83811E-06 | 0.0059199   |
| 1542.43997 | 169.743219 | 3.83087E-06 | 0.005908884 |
| 1542.47997 | 156.029414 | 3.52137E-06 | 0.005431637 |
| 1542.51997 | 142.919837 | 3.2255E-06  | 0.004975401 |
| 1542.55997 | 151.145637 | 3.41115E-06 | 0.005261898 |
| 1542.59997 | 159.302358 | 3.59523E-06 | 0.005546005 |
| 1542.63997 | 175.361335 | 3.95766E-06 | 0.006105246 |
| 1542.67997 | 198.007621 | 4.46876E-06 | 0.006893861 |
| 1542.71997 | 183.621932 | 4.14409E-06 | 0.006393172 |
| 1542.75997 | 159.883431 | 3.60835E-06 | 0.005566812 |
| 1542.79997 | 179.469785 | 4.05038E-06 | 0.006248931 |
| 1542.83997 | 180.217871 | 4.06727E-06 | 0.006275141 |
| 1542.87997 | 159.557604 | 3.60099E-06 | 0.0055559   |

|            |            |             |             |
|------------|------------|-------------|-------------|
| 1542.91997 | 138.209557 | 3.1192E-06  | 0.004812672 |
| 1542.95997 | 151.873465 | 3.42757E-06 | 0.005288607 |
| 1542.99997 | 173.834956 | 3.92321E-06 | 0.006053517 |
| 1543.03997 | 168.540128 | 3.80372E-06 | 0.005869286 |
| 1543.07997 | 170.613091 | 3.8505E-06  | 0.005941629 |
| 1543.11997 | 181.119393 | 4.08761E-06 | 0.006307676 |
| 1543.15997 | 174.526403 | 3.93882E-06 | 0.006078226 |
| 1543.19997 | 172.831316 | 3.90056E-06 | 0.006019347 |
| 1543.23997 | 203.54598  | 4.59375E-06 | 0.007089257 |
| 1543.27997 | 223.903853 | 5.0532E-06  | 0.007798499 |
| 1543.31997 | 203.611014 | 4.59522E-06 | 0.00709189  |
| 1543.35997 | 182.393017 | 4.11636E-06 | 0.00635302  |
| 1543.39997 | 181.881694 | 4.10482E-06 | 0.006335374 |
| 1543.43997 | 179.659477 | 4.05466E-06 | 0.006258131 |
| 1543.47997 | 164.919236 | 3.722E-06   | 0.005744829 |
| 1543.51997 | 141.411091 | 3.19145E-06 | 0.004926069 |
| 1543.55997 | 139.822036 | 3.15559E-06 | 0.00487084  |
| 1543.59997 | 139.58013  | 3.15013E-06 | 0.004862539 |
| 1543.63997 | 120.294937 | 2.71489E-06 | 0.004190811 |
| 1543.67997 | 96.435357  | 2.17641E-06 | 0.003359683 |
| 1543.71997 | 86.836951  | 1.95979E-06 | 0.003025365 |
| 1543.75997 | 102.163812 | 2.30569E-06 | 0.00355944  |
| 1543.79997 | 136.858216 | 3.0887E-06  | 0.004768334 |
| 1543.83997 | 151.144601 | 3.41112E-06 | 0.005266228 |
| 1543.87997 | 154.851082 | 3.49477E-06 | 0.00539551  |
| 1543.91997 | 153.545857 | 3.46532E-06 | 0.005350171 |
| 1543.95997 | 152.748811 | 3.44733E-06 | 0.005322536 |
| 1543.99997 | 151.768362 | 3.4252E-06  | 0.00528851  |
| 1544.03997 | 149.771296 | 3.38013E-06 | 0.005219055 |
| 1544.07997 | 164.464728 | 3.71174E-06 | 0.005731223 |
| 1544.11997 | 176.26524  | 3.97806E-06 | 0.006142603 |
| 1544.15997 | 164.418006 | 3.71069E-06 | 0.005729892 |
| 1544.19997 | 153.630756 | 3.46723E-06 | 0.0053541   |
| 1544.23997 | 155.801776 | 3.51623E-06 | 0.005429901 |
| 1544.27997 | 166.235521 | 3.7517E-06  | 0.005793682 |
| 1544.31997 | 177.903872 | 4.01504E-06 | 0.00620051  |
| 1544.35997 | 166.410564 | 3.75565E-06 | 0.005800083 |
| 1544.39997 | 162.376786 | 3.66462E-06 | 0.005659636 |
| 1544.43997 | 165.254773 | 3.72957E-06 | 0.005760097 |
| 1544.47997 | 145.529005 | 3.28439E-06 | 0.00507267  |
| 1544.51997 | 124.467125 | 2.80905E-06 | 0.004338633 |
| 1544.55997 | 128.157606 | 2.89234E-06 | 0.004467391 |
| 1544.59997 | 135.602434 | 3.06036E-06 | 0.004727029 |
| 1544.63997 | 140.022576 | 3.16011E-06 | 0.004881239 |
| 1544.67997 | 138.79952  | 3.13251E-06 | 0.004838728 |
| 1544.71997 | 142.139542 | 3.20789E-06 | 0.004955294 |

|            |            |             |             |
|------------|------------|-------------|-------------|
| 1544.75997 | 166.708868 | 3.76239E-06 | 0.005811985 |
| 1544.79997 | 183.574298 | 4.14302E-06 | 0.006400131 |
| 1544.83997 | 197.295135 | 4.45268E-06 | 0.006878672 |
| 1544.87997 | 184.767444 | 4.16994E-06 | 0.006442063 |
| 1544.91997 | 187.917265 | 4.24103E-06 | 0.006552053 |
| 1544.95997 | 205.302158 | 4.63338E-06 | 0.007158392 |
| 1544.99997 | 187.979584 | 4.24244E-06 | 0.006554566 |
| 1545.03997 | 161.684332 | 3.64899E-06 | 0.005637836 |
| 1545.07997 | 154.254269 | 3.4813E-06  | 0.005378893 |
| 1545.11997 | 150.028175 | 3.38593E-06 | 0.005231663 |
| 1545.15997 | 175.890252 | 3.9696E-06  | 0.006133664 |
| 1545.19997 | 193.06846  | 4.35729E-06 | 0.006732879 |
| 1545.23997 | 203.992903 | 4.60384E-06 | 0.007114031 |
| 1545.27997 | 215.185913 | 4.85645E-06 | 0.007504569 |
| 1545.31997 | 215.248713 | 4.85786E-06 | 0.007506954 |
| 1545.35997 | 196.775016 | 4.44094E-06 | 0.006862848 |
| 1545.39997 | 171.892307 | 3.87937E-06 | 0.005995178 |
| 1545.43997 | 153.23734  | 3.45835E-06 | 0.005344677 |
| 1545.47997 | 136.334727 | 3.07688E-06 | 0.004755264 |
| 1545.51997 | 114.562652 | 2.58552E-06 | 0.003995972 |
| 1545.55997 | 105.360187 | 2.37783E-06 | 0.003675083 |
| 1545.59997 | 118.138237 | 2.66622E-06 | 0.004120903 |
| 1545.63997 | 133.493508 | 3.01276E-06 | 0.004656646 |
| 1545.67997 | 146.349092 | 3.3029E-06  | 0.005105219 |
| 1545.71997 | 150.592536 | 3.39866E-06 | 0.005253382 |
| 1545.75997 | 167.89401  | 3.78913E-06 | 0.005857092 |
| 1545.79997 | 177.199359 | 3.99914E-06 | 0.006181875 |
| 1545.83997 | 155.303966 | 3.50499E-06 | 0.00541816  |
| 1545.87997 | 138.699624 | 3.13026E-06 | 0.004839002 |
| 1545.91997 | 157.927017 | 3.56419E-06 | 0.005509957 |
| 1545.95997 | 163.315972 | 3.68581E-06 | 0.005698121 |
| 1545.99997 | 153.74369  | 3.46978E-06 | 0.005364281 |
| 1546.03997 | 167.213651 | 3.77378E-06 | 0.005834413 |
| 1546.07997 | 185.237362 | 4.18055E-06 | 0.006463463 |
| 1546.11997 | 190.018737 | 4.28846E-06 | 0.006630471 |
| 1546.15997 | 175.349921 | 3.9574E-06  | 0.006118779 |
| 1546.19997 | 166.691276 | 3.76199E-06 | 0.005816789 |
| 1546.23997 | 175.744353 | 3.96631E-06 | 0.00613286  |
| 1546.27997 | 164.670996 | 3.7164E-06  | 0.005746587 |
| 1546.31997 | 156.925665 | 3.54159E-06 | 0.005476437 |
| 1546.35997 | 167.546493 | 3.78129E-06 | 0.005847237 |
| 1546.39997 | 185.9915   | 4.19757E-06 | 0.006491121 |
| 1546.43997 | 190.208853 | 4.29275E-06 | 0.006638478 |
| 1546.47997 | 191.497208 | 4.32183E-06 | 0.006683616 |
| 1546.51997 | 175.924006 | 3.97036E-06 | 0.006140241 |
| 1546.55997 | 150.125952 | 3.38813E-06 | 0.005239952 |



|            |            |             |             |
|------------|------------|-------------|-------------|
| 1546.59997 | 123.072103 | 2.77757E-06 | 0.004295783 |
| 1546.63997 | 114.497358 | 2.58405E-06 | 0.003996589 |
| 1546.67997 | 124.28205  | 2.80487E-06 | 0.004338241 |
| 1546.71997 | 137.301378 | 3.0987E-06  | 0.004792822 |
| 1546.75997 | 142.606001 | 3.21842E-06 | 0.004978121 |
| 1546.79997 | 158.082421 | 3.5677E-06  | 0.005518518 |
| 1546.83997 | 148.593018 | 3.35354E-06 | 0.005187386 |
| 1546.87997 | 130.271401 | 2.94004E-06 | 0.004547895 |
| 1546.91997 | 123.808951 | 2.7942E-06  | 0.004322397 |
| 1546.95997 | 137.868479 | 3.1115E-06  | 0.004813365 |
| 1546.99997 | 166.257775 | 3.75221E-06 | 0.005804663 |
| 1547.03997 | 186.933457 | 4.21883E-06 | 0.006526695 |
| 1547.07997 | 186.093196 | 4.19986E-06 | 0.006497526 |
| 1547.11997 | 172.135771 | 3.88486E-06 | 0.006010352 |
| 1547.15997 | 161.412715 | 3.64286E-06 | 0.005636087 |
| 1547.19997 | 161.641833 | 3.64803E-06 | 0.005644233 |
| 1547.23997 | 180.065027 | 4.06382E-06 | 0.0062877   |
| 1547.27997 | 200.023716 | 4.51426E-06 | 0.006984819 |
| 1547.31997 | 213.696982 | 4.82284E-06 | 0.007462482 |
| 1547.35997 | 214.610701 | 4.84346E-06 | 0.007494583 |
| 1547.39997 | 206.074072 | 4.6508E-06  | 0.007196655 |
| 1547.43997 | 188.438299 | 4.25279E-06 | 0.006580937 |
| 1547.47997 | 160.073258 | 3.61263E-06 | 0.005590473 |
| 1547.51997 | 136.515535 | 3.08097E-06 | 0.004767856 |
| 1547.55997 | 132.951489 | 3.00053E-06 | 0.0046435   |
| 1547.59997 | 127.242203 | 2.87168E-06 | 0.004444211 |
| 1547.63997 | 126.37288  | 2.85206E-06 | 0.004413962 |
| 1547.67997 | 142.1412   | 3.20793E-06 | 0.004964847 |
| 1547.71997 | 162.11883  | 3.6588E-06  | 0.005662792 |
| 1547.75997 | 167.627858 | 3.78313E-06 | 0.005855373 |
| 1547.79997 | 175.112182 | 3.95204E-06 | 0.006116964 |
| 1547.83997 | 167.22805  | 3.7741E-06  | 0.005841709 |
| 1547.87997 | 156.442787 | 3.5307E-06  | 0.005465093 |
| 1547.91997 | 152.030387 | 3.43111E-06 | 0.00531109  |
| 1547.95997 | 157.419574 | 3.55274E-06 | 0.0054995   |
| 1547.99997 | 157.487733 | 3.55428E-06 | 0.005502023 |
| 1548.03997 | 149.941908 | 3.38398E-06 | 0.005238536 |
| 1548.07997 | 146.627132 | 3.30917E-06 | 0.00512286  |
| 1548.11997 | 144.336029 | 3.25746E-06 | 0.005042944 |
| 1548.15997 | 169.06488  | 3.81556E-06 | 0.005907095 |
| 1548.19997 | 187.976586 | 4.24237E-06 | 0.006568037 |
| 1548.23997 | 194.757001 | 4.39539E-06 | 0.006805125 |
| 1548.27997 | 193.733488 | 4.37229E-06 | 0.006769537 |
| 1548.31997 | 184.272473 | 4.15877E-06 | 0.006439111 |
| 1548.35997 | 181.586415 | 4.09815E-06 | 0.006345415 |
| 1548.39997 | 189.426718 | 4.2751E-06  | 0.00661956  |

|            |            |             |             |
|------------|------------|-------------|-------------|
| 1548.43997 | 197.873511 | 4.46573E-06 | 0.006914914 |
| 1548.47997 | 190.803975 | 4.30618E-06 | 0.006668033 |
| 1548.51997 | 169.629185 | 3.82829E-06 | 0.00592819  |
| 1548.55997 | 178.015248 | 4.01756E-06 | 0.006221427 |
| 1548.59997 | 195.101519 | 4.40317E-06 | 0.006818748 |
| 1548.63997 | 196.549937 | 4.43586E-06 | 0.006869547 |
| 1548.67997 | 194.62273  | 4.39236E-06 | 0.006802366 |
| 1548.71997 | 168.950692 | 3.81298E-06 | 0.005905241 |
| 1548.75997 | 158.108226 | 3.56828E-06 | 0.005526413 |
| 1548.79997 | 151.991593 | 3.43024E-06 | 0.005312753 |
| 1548.83997 | 151.390278 | 3.41667E-06 | 0.005291872 |
| 1548.87997 | 157.453917 | 3.55352E-06 | 0.005503969 |
| 1548.91997 | 158.599567 | 3.57937E-06 | 0.00554416  |
| 1548.95997 | 142.749571 | 3.22166E-06 | 0.004990221 |
| 1548.99997 | 131.334171 | 2.96403E-06 | 0.004591281 |
| 1549.03997 | 131.857564 | 2.97584E-06 | 0.004609698 |
| 1549.07997 | 126.50961  | 2.85515E-06 | 0.004422849 |
| 1549.11997 | 136.578958 | 3.0824E-06  | 0.004775003 |
| 1549.15997 | 156.143302 | 3.52394E-06 | 0.005459142 |
| 1549.19997 | 185.901358 | 4.19553E-06 | 0.006499722 |
| 1549.23997 | 220.189842 | 4.96938E-06 | 0.007698759 |
| 1549.27997 | 248.690884 | 5.61261E-06 | 0.008695499 |
| 1549.31997 | 238.433704 | 5.38112E-06 | 0.008337071 |
| 1549.35997 | 237.886451 | 5.36877E-06 | 0.008318151 |
| 1549.39997 | 259.235569 | 5.85059E-06 | 0.009064897 |
| 1549.43997 | 270.498514 | 6.10477E-06 | 0.009458982 |
| 1549.47997 | 245.822068 | 5.54786E-06 | 0.008596301 |
| 1549.51997 | 198.062998 | 4.47001E-06 | 0.006926364 |
| 1549.55997 | 190.682945 | 4.30345E-06 | 0.006668451 |
| 1549.59997 | 177.521941 | 4.00642E-06 | 0.006208353 |
| 1549.63997 | 152.887336 | 3.45045E-06 | 0.005346962 |
| 1549.67997 | 146.167897 | 3.29881E-06 | 0.005112093 |
| 1549.71997 | 143.216156 | 3.23219E-06 | 0.005008988 |
| 1549.75997 | 151.605992 | 3.42154E-06 | 0.00530256  |
| 1549.79997 | 178.459506 | 4.02758E-06 | 0.006241947 |
| 1549.83997 | 238.282112 | 5.3777E-06  | 0.008334567 |
| 1549.87997 | 286.067257 | 6.45614E-06 | 0.010006241 |
| 1549.91997 | 255.954756 | 5.77654E-06 | 0.008953178 |
| 1549.95997 | 199.705054 | 4.50706E-06 | 0.00698577  |
| 1549.99997 | 163.074444 | 3.68036E-06 | 0.005704563 |
| 1550.03997 | 157.152833 | 3.54672E-06 | 0.005497559 |
| 1550.07997 | 166.527874 | 3.7583E-06  | 0.005825669 |
| 1550.11997 | 160.34663  | 3.6188E-06  | 0.005609574 |
| 1550.15997 | 172.139349 | 3.88495E-06 | 0.006022287 |
| 1550.19997 | 200.463439 | 4.52418E-06 | 0.007013385 |
| 1550.23997 | 219.596417 | 4.95599E-06 | 0.007682966 |

|            |            |             |             |
|------------|------------|-------------|-------------|
| 1550.27997 | 230.419141 | 5.20024E-06 | 0.008061826 |
| 1550.31997 | 248.254264 | 5.60275E-06 | 0.00868606  |
| 1550.35997 | 262.955373 | 5.93454E-06 | 0.009200668 |
| 1550.39997 | 269.064161 | 6.0724E-06  | 0.009414654 |
| 1550.43997 | 255.565047 | 5.76775E-06 | 0.008942546 |
| 1550.47997 | 226.452746 | 5.11072E-06 | 0.007924074 |
| 1550.51997 | 188.695526 | 4.2586E-06  | 0.006603037 |
| 1550.55997 | 155.466723 | 3.50867E-06 | 0.005440399 |
| 1550.59997 | 132.871991 | 2.99874E-06 | 0.00464984  |
| 1550.63997 | 144.89789  | 3.27014E-06 | 0.005070815 |
| 1550.67997 | 173.930382 | 3.92537E-06 | 0.006086987 |
| 1550.71997 | 173.801085 | 3.92245E-06 | 0.006082619 |
| 1550.75997 | 161.311216 | 3.64057E-06 | 0.005645649 |
| 1550.79997 | 166.679616 | 3.76173E-06 | 0.005833686 |
| 1550.83997 | 192.478595 | 4.34397E-06 | 0.006736808 |
| 1550.87997 | 207.308403 | 4.67866E-06 | 0.007256043 |
| 1550.91997 | 187.009702 | 4.22055E-06 | 0.006545733 |
| 1550.95997 | 161.531577 | 3.64554E-06 | 0.005654091 |
| 1550.99997 | 160.396238 | 3.61992E-06 | 0.005614495 |
| 1551.03997 | 165.132608 | 3.72681E-06 | 0.005780436 |
| 1551.07997 | 168.143926 | 3.79477E-06 | 0.005885998 |
| 1551.11997 | 166.947417 | 3.76777E-06 | 0.005844264 |
| 1551.15997 | 178.959189 | 4.03886E-06 | 0.006264917 |
| 1551.19997 | 195.738083 | 4.41754E-06 | 0.006852482 |
| 1551.23997 | 207.607071 | 4.6854E-06  | 0.007268184 |
| 1551.27997 | 209.637391 | 4.73122E-06 | 0.007339453 |
| 1551.31997 | 208.184367 | 4.69843E-06 | 0.00728877  |
| 1551.35997 | 212.994452 | 4.80699E-06 | 0.007457369 |
| 1551.39997 | 223.08196  | 5.03465E-06 | 0.007810754 |
| 1551.43997 | 212.526535 | 4.79643E-06 | 0.00744137  |
| 1551.47997 | 178.643122 | 4.03173E-06 | 0.006255143 |
| 1551.51997 | 173.195645 | 3.90878E-06 | 0.006064557 |
| 1551.55997 | 159.711324 | 3.60446E-06 | 0.005592539 |
| 1551.59997 | 125.818965 | 2.83956E-06 | 0.004405859 |
| 1551.63997 | 115.456153 | 2.60568E-06 | 0.004043084 |
| 1551.67997 | 134.467067 | 3.03473E-06 | 0.004708937 |
| 1551.71997 | 157.309287 | 3.55025E-06 | 0.005508996 |
| 1551.75997 | 167.088454 | 3.77095E-06 | 0.005851615 |
| 1551.79997 | 173.065257 | 3.90584E-06 | 0.006061085 |
| 1551.83997 | 173.431169 | 3.9141E-06  | 0.006074057 |
| 1551.87997 | 182.942307 | 4.12875E-06 | 0.006407329 |
| 1551.91997 | 178.522439 | 4.029E-06   | 0.00625269  |
| 1551.95997 | 176.692689 | 3.98771E-06 | 0.006188763 |
| 1551.99997 | 181.683143 | 4.10034E-06 | 0.006363721 |
| 1552.03997 | 190.228696 | 4.2932E-06  | 0.006663213 |
| 1552.07997 | 214.426125 | 4.8393E-06  | 0.007510979 |

|            |            |             |             |
|------------|------------|-------------|-------------|
| 1552.11997 | 225.586139 | 5.09116E-06 | 0.007902099 |
| 1552.15997 | 205.092851 | 4.62866E-06 | 0.007184421 |
| 1552.19997 | 176.851906 | 3.9913E-06  | 0.006195298 |
| 1552.23997 | 167.203096 | 3.77354E-06 | 0.005857441 |
| 1552.27997 | 182.755752 | 4.12454E-06 | 0.006402445 |
| 1552.31997 | 199.975872 | 4.51318E-06 | 0.007005895 |
| 1552.35997 | 216.984745 | 4.89704E-06 | 0.007601974 |
| 1552.39997 | 221.955073 | 5.00922E-06 | 0.007776308 |
| 1552.43997 | 199.354392 | 4.49915E-06 | 0.006984662 |
| 1552.47997 | 171.967436 | 3.88107E-06 | 0.006025276 |
| 1552.51997 | 165.12452  | 3.72663E-06 | 0.005785668 |
| 1552.55997 | 149.958461 | 3.38435E-06 | 0.005254412 |
| 1552.59997 | 156.394809 | 3.52961E-06 | 0.005480077 |
| 1552.63997 | 172.995508 | 3.90427E-06 | 0.006061922 |
| 1552.67997 | 162.973893 | 3.67809E-06 | 0.005710903 |
| 1552.71997 | 160.208957 | 3.61569E-06 | 0.005614159 |
| 1552.75997 | 164.393444 | 3.71013E-06 | 0.005760943 |
| 1552.79997 | 173.824015 | 3.92297E-06 | 0.006091581 |
| 1552.83997 | 177.982438 | 4.01682E-06 | 0.006237472 |
| 1552.87997 | 180.586092 | 4.07558E-06 | 0.006328881 |
| 1552.91997 | 193.667003 | 4.37079E-06 | 0.006787494 |
| 1552.95997 | 187.540587 | 4.23253E-06 | 0.006572949 |
| 1552.99997 | 160.399018 | 3.61998E-06 | 0.005621833 |
| 1553.03997 | 143.559114 | 3.23993E-06 | 0.00503174  |
| 1553.07997 | 162.127128 | 3.65898E-06 | 0.005682694 |
| 1553.11997 | 184.136274 | 4.1557E-06  | 0.006454299 |
| 1553.15997 | 179.622537 | 4.05383E-06 | 0.006296247 |
| 1553.19997 | 165.521698 | 3.73559E-06 | 0.005802125 |
| 1553.23997 | 170.538844 | 3.84882E-06 | 0.005978148 |
| 1553.27997 | 193.335591 | 4.36331E-06 | 0.00677745  |
| 1553.31997 | 207.964516 | 4.69347E-06 | 0.00729046  |
| 1553.35997 | 210.754117 | 4.75643E-06 | 0.007388443 |
| 1553.39997 | 205.65942  | 4.64145E-06 | 0.007210023 |
| 1553.43997 | 196.401434 | 4.43251E-06 | 0.006885633 |
| 1553.47997 | 171.390199 | 3.86804E-06 | 0.00600892  |
| 1553.51997 | 152.513183 | 3.44201E-06 | 0.005347231 |
| 1553.55997 | 140.380136 | 3.16818E-06 | 0.004921964 |
| 1553.59997 | 139.408949 | 3.14627E-06 | 0.004888038 |
| 1553.63997 | 134.101766 | 3.02649E-06 | 0.004702076 |
| 1553.67997 | 130.051449 | 2.93508E-06 | 0.004560175 |
| 1553.71997 | 142.687672 | 3.22026E-06 | 0.005003385 |
| 1553.75997 | 156.02768  | 3.52133E-06 | 0.005471298 |
| 1553.79997 | 162.272529 | 3.66226E-06 | 0.005690427 |
| 1553.83997 | 164.85049  | 3.72045E-06 | 0.005780978 |
| 1553.87997 | 165.717631 | 3.74002E-06 | 0.005811536 |
| 1553.91997 | 160.47071  | 3.6216E-06  | 0.005627677 |

|            |            |             |             |
|------------|------------|-------------|-------------|
| 1553.95997 | 152.85224  | 3.44966E-06 | 0.005360637 |
| 1553.99997 | 139.78256  | 3.1547E-06  | 0.0049024   |
| 1554.03997 | 139.509502 | 3.14854E-06 | 0.004892949 |
| 1554.07997 | 146.422291 | 3.30455E-06 | 0.005135531 |
| 1554.11997 | 162.039799 | 3.65701E-06 | 0.005683436 |
| 1554.15997 | 169.66135  | 3.82902E-06 | 0.00595091  |
| 1554.19997 | 167.561124 | 3.78162E-06 | 0.005877396 |
| 1554.23997 | 195.598711 | 4.41439E-06 | 0.006861022 |
| 1554.27997 | 198.147573 | 4.47191E-06 | 0.006950607 |
| 1554.31997 | 176.824171 | 3.99068E-06 | 0.006202786 |
| 1554.35997 | 165.069112 | 3.72538E-06 | 0.005790581 |
| 1554.39997 | 171.950337 | 3.88068E-06 | 0.006032128 |
| 1554.43997 | 169.966262 | 3.8359E-06  | 0.005962679 |
| 1554.47997 | 164.525373 | 3.71311E-06 | 0.005771953 |
| 1554.51997 | 150.385294 | 3.39399E-06 | 0.00527602  |
| 1554.55997 | 138.076731 | 3.1162E-06  | 0.004844319 |
| 1554.59997 | 143.988074 | 3.24961E-06 | 0.005051844 |
| 1554.63997 | 152.745176 | 3.44725E-06 | 0.005359226 |
| 1554.67997 | 143.668991 | 3.24241E-06 | 0.005040908 |
| 1554.71997 | 126.146883 | 2.84696E-06 | 0.004426225 |
| 1554.75997 | 127.954335 | 2.88775E-06 | 0.00448976  |
| 1554.79997 | 136.260055 | 3.0752E-06  | 0.00478132  |
| 1554.83997 | 157.450482 | 3.55344E-06 | 0.005525028 |
| 1554.87997 | 187.31672  | 4.22748E-06 | 0.00657322  |
| 1554.91997 | 181.023719 | 4.08545E-06 | 0.006352553 |
| 1554.95997 | 141.223457 | 3.18722E-06 | 0.004955994 |
| 1554.99997 | 137.344699 | 3.09968E-06 | 0.00482     |
| 1555.03997 | 144.02087  | 3.25035E-06 | 0.005054425 |
| 1555.07997 | 150.916684 | 3.40598E-06 | 0.00529657  |
| 1555.11997 | 162.125138 | 3.65894E-06 | 0.005690088 |
| 1555.15997 | 156.506481 | 3.53213E-06 | 0.005493032 |
| 1555.19997 | 160.301642 | 3.61778E-06 | 0.005626379 |
| 1555.23997 | 155.848909 | 3.51729E-06 | 0.005470234 |
| 1555.27997 | 153.944514 | 3.47431E-06 | 0.00540353  |
| 1555.31997 | 156.409294 | 3.52994E-06 | 0.005490186 |
| 1555.35997 | 166.524742 | 3.75823E-06 | 0.005845403 |
| 1555.39997 | 177.873368 | 4.01435E-06 | 0.006243926 |
| 1555.43997 | 164.833709 | 3.72007E-06 | 0.005786341 |
| 1555.47997 | 151.616532 | 3.42177E-06 | 0.005322501 |
| 1555.51997 | 146.785007 | 3.31273E-06 | 0.005153023 |
| 1555.55997 | 148.269511 | 3.34624E-06 | 0.005205271 |
| 1555.59997 | 131.102663 | 2.9588E-06  | 0.004602716 |
| 1555.63997 | 117.51595  | 2.65217E-06 | 0.004125824 |
| 1555.67997 | 132.575789 | 2.99205E-06 | 0.004654674 |
| 1555.71997 | 165.026762 | 3.72442E-06 | 0.005794161 |
| 1555.75997 | 179.182572 | 4.0439E-06  | 0.006291339 |

|            |            |             |             |
|------------|------------|-------------|-------------|
| 1555.79997 | 178.045763 | 4.01824E-06 | 0.006251585 |
| 1555.83997 | 186.458407 | 4.20811E-06 | 0.00654714  |
| 1555.87997 | 191.126924 | 4.31347E-06 | 0.006711239 |
| 1555.91997 | 182.901699 | 4.12784E-06 | 0.006422583 |
| 1555.95997 | 173.360565 | 3.91251E-06 | 0.006087703 |
| 1555.99997 | 160.810191 | 3.62926E-06 | 0.005647132 |
| 1556.03997 | 147.839009 | 3.33652E-06 | 0.005191759 |
| 1556.07997 | 153.790394 | 3.47083E-06 | 0.005400897 |
| 1556.11997 | 162.395997 | 3.66505E-06 | 0.00570326  |
| 1556.15997 | 169.340995 | 3.82179E-06 | 0.005947317 |
| 1556.19997 | 173.379235 | 3.91293E-06 | 0.006089298 |
| 1556.23997 | 181.089673 | 4.08694E-06 | 0.006360262 |
| 1556.27997 | 187.92955  | 4.24131E-06 | 0.006600663 |
| 1556.31997 | 182.740806 | 4.12421E-06 | 0.006418583 |
| 1556.35997 | 187.673254 | 4.23552E-06 | 0.006592    |
| 1556.39997 | 189.476784 | 4.27623E-06 | 0.00665552  |
| 1556.43997 | 185.828721 | 4.1939E-06  | 0.006527546 |
| 1556.47997 | 172.693511 | 3.89745E-06 | 0.006066306 |
| 1556.51997 | 143.531785 | 3.23931E-06 | 0.005042055 |
| 1556.55997 | 133.203769 | 3.00622E-06 | 0.004679367 |
| 1556.59997 | 144.410048 | 3.25913E-06 | 0.005073167 |
| 1556.63997 | 149.969657 | 3.38461E-06 | 0.005268613 |
| 1556.67997 | 139.081554 | 3.13888E-06 | 0.004886227 |
| 1556.71997 | 146.23988  | 3.30043E-06 | 0.005137846 |
| 1556.75997 | 154.61085  | 3.48935E-06 | 0.005432083 |
| 1556.79997 | 148.396038 | 3.34909E-06 | 0.005213866 |
| 1556.83997 | 160.672177 | 3.62615E-06 | 0.005645331 |
| 1556.87997 | 179.169851 | 4.04361E-06 | 0.006295422 |
| 1556.91997 | 182.291022 | 4.11405E-06 | 0.006405254 |
| 1556.95997 | 167.895545 | 3.78917E-06 | 0.005899584 |
| 1556.99997 | 145.205227 | 3.27708E-06 | 0.005102413 |
| 1557.03997 | 144.409614 | 3.25912E-06 | 0.005074586 |
| 1557.07997 | 167.519724 | 3.78069E-06 | 0.005886832 |
| 1557.11997 | 183.460476 | 4.14045E-06 | 0.006447173 |
| 1557.15997 | 190.733072 | 4.30458E-06 | 0.006702919 |
| 1557.19997 | 191.958197 | 4.33223E-06 | 0.006746147 |
| 1557.23997 | 177.428443 | 4.00431E-06 | 0.006235676 |
| 1557.27997 | 159.026194 | 3.589E-06   | 0.005589077 |
| 1557.31997 | 137.678949 | 3.10722E-06 | 0.004838939 |
| 1557.35997 | 131.902829 | 2.97686E-06 | 0.004636047 |
| 1557.39997 | 137.837459 | 3.1108E-06  | 0.004844759 |
| 1557.43997 | 142.636098 | 3.2191E-06  | 0.005013552 |
| 1557.47997 | 155.095408 | 3.50029E-06 | 0.005451627 |
| 1557.51997 | 156.163847 | 3.5244E-06  | 0.005489324 |
| 1557.55997 | 141.271343 | 3.1883E-06  | 0.004965964 |
| 1557.59997 | 137.036193 | 3.09272E-06 | 0.004817214 |

|            |            |             |             |
|------------|------------|-------------|-------------|
| 1557.63997 | 126.761922 | 2.86084E-06 | 0.004456159 |
| 1557.67997 | 111.728091 | 2.52155E-06 | 0.003927764 |
| 1557.71997 | 121.075052 | 2.7325E-06  | 0.004256462 |
| 1557.75997 | 142.788087 | 3.22253E-06 | 0.005019925 |
| 1557.79997 | 146.954501 | 3.31656E-06 | 0.005166535 |
| 1557.83997 | 145.493588 | 3.28359E-06 | 0.005115304 |
| 1557.87997 | 137.526738 | 3.10379E-06 | 0.004835327 |
| 1557.91997 | 146.409222 | 3.30425E-06 | 0.005147761 |
| 1557.95997 | 149.364309 | 3.37094E-06 | 0.005251796 |
| 1557.99997 | 138.54679  | 3.12681E-06 | 0.004871567 |
| 1558.03997 | 140.571619 | 3.17251E-06 | 0.004942891 |
| 1558.07997 | 139.320619 | 3.14427E-06 | 0.004899028 |
| 1558.11997 | 137.347072 | 3.09973E-06 | 0.004829754 |
| 1558.15997 | 125.230718 | 2.82628E-06 | 0.004403801 |
| 1558.19997 | 125.29942  | 2.82783E-06 | 0.00440633  |
| 1558.23997 | 145.452993 | 3.28267E-06 | 0.00511519  |
| 1558.27997 | 163.162676 | 3.68235E-06 | 0.005738139 |
| 1558.31997 | 171.90764  | 3.87972E-06 | 0.006045839 |
| 1558.35997 | 178.436095 | 4.02705E-06 | 0.0062756   |
| 1558.39997 | 179.171243 | 4.04365E-06 | 0.006301617 |
| 1558.43997 | 178.255197 | 4.02297E-06 | 0.00626956  |
| 1558.47997 | 154.989918 | 3.49791E-06 | 0.005451417 |
| 1558.51997 | 142.193671 | 3.20911E-06 | 0.005001467 |
| 1558.55997 | 157.56566  | 3.55604E-06 | 0.005542298 |
| 1558.59997 | 153.747885 | 3.46988E-06 | 0.005408148 |
| 1558.63997 | 136.658423 | 3.08419E-06 | 0.004807142 |
| 1558.67997 | 124.585742 | 2.81173E-06 | 0.004382582 |
| 1558.71997 | 133.83946  | 3.02057E-06 | 0.004708223 |
| 1558.75997 | 152.574826 | 3.4434E-06  | 0.005367436 |
| 1558.79997 | 145.683151 | 3.28787E-06 | 0.005125125 |
| 1558.83997 | 156.506819 | 3.53214E-06 | 0.005506042 |
| 1558.87997 | 166.987112 | 3.76867E-06 | 0.005874899 |
| 1558.91997 | 159.221189 | 3.5934E-06  | 0.005601824 |
| 1558.95997 | 155.250029 | 3.50378E-06 | 0.005462248 |
| 1558.99997 | 154.440959 | 3.48552E-06 | 0.005433921 |
| 1559.03997 | 159.366536 | 3.59668E-06 | 0.005607369 |
| 1559.07997 | 160.13238  | 3.61396E-06 | 0.00563446  |
| 1559.11997 | 147.983734 | 3.33979E-06 | 0.005207128 |
| 1559.15997 | 135.510969 | 3.05829E-06 | 0.004768369 |
| 1559.19997 | 139.741495 | 3.15377E-06 | 0.004917359 |
| 1559.23997 | 155.461862 | 3.50856E-06 | 0.005470683 |
| 1559.27997 | 162.6834   | 3.67154E-06 | 0.005724955 |
| 1559.31997 | 162.376341 | 3.66461E-06 | 0.005714296 |
| 1559.35997 | 167.457771 | 3.77929E-06 | 0.005893271 |
| 1559.39997 | 183.350161 | 4.13796E-06 | 0.006452731 |
| 1559.43997 | 190.302548 | 4.29486E-06 | 0.006697582 |

|            |            |             |             |
|------------|------------|-------------|-------------|
| 1559.47997 | 173.931706 | 3.9254E-06  | 0.006121577 |
| 1559.51997 | 154.031667 | 3.47628E-06 | 0.005421328 |
| 1559.55997 | 152.153385 | 3.43389E-06 | 0.005355357 |
| 1559.59997 | 143.110485 | 3.2298E-06  | 0.005037203 |
| 1559.63997 | 131.096157 | 2.95866E-06 | 0.004614441 |
| 1559.67997 | 129.838523 | 2.93027E-06 | 0.004570291 |
| 1559.71997 | 134.313563 | 3.03127E-06 | 0.004727932 |
| 1559.75997 | 137.408452 | 3.10112E-06 | 0.004836999 |
| 1559.79997 | 133.000911 | 3.00165E-06 | 0.004681966 |
| 1559.83997 | 133.2189   | 3.00657E-06 | 0.00468976  |
| 1559.87997 | 126.890656 | 2.86375E-06 | 0.004467099 |
| 1559.91997 | 131.814784 | 2.97488E-06 | 0.004640569 |
| 1559.95997 | 126.32702  | 2.85102E-06 | 0.004447485 |
| 1559.99997 | 131.351795 | 2.96443E-06 | 0.004624506 |
| 1560.03997 | 150.33248  | 3.39279E-06 | 0.005292895 |
| 1560.07997 | 142.563023 | 3.21745E-06 | 0.005019478 |
| 1560.11997 | 140.208492 | 3.16431E-06 | 0.004936704 |
| 1560.15997 | 153.526531 | 3.46488E-06 | 0.005405767 |
| 1560.19997 | 146.599462 | 3.30855E-06 | 0.005161993 |
| 1560.23997 | 144.338624 | 3.25752E-06 | 0.005082516 |
| 1560.27997 | 171.402048 | 3.86831E-06 | 0.00603564  |
| 1560.31997 | 198.119158 | 4.47127E-06 | 0.006976617 |
| 1560.35997 | 205.940497 | 4.64779E-06 | 0.007252226 |
| 1560.39997 | 200.18892  | 4.51799E-06 | 0.007049864 |
| 1560.43997 | 192.355421 | 4.34119E-06 | 0.006774173 |
| 1560.47997 | 175.088565 | 3.95151E-06 | 0.006166244 |
| 1560.51997 | 151.625697 | 3.42198E-06 | 0.005340069 |
| 1560.55997 | 124.093392 | 2.80062E-06 | 0.004370528 |
| 1560.59997 | 113.510164 | 2.56177E-06 | 0.003997892 |
| 1560.63997 | 133.313404 | 3.0087E-06  | 0.004695494 |
| 1560.67997 | 161.385172 | 3.64224E-06 | 0.005684369 |
| 1560.71997 | 185.232677 | 4.18044E-06 | 0.006524502 |
| 1560.75997 | 181.386838 | 4.09365E-06 | 0.006389202 |
| 1560.79997 | 181.418423 | 4.09436E-06 | 0.006390479 |
| 1560.83997 | 178.374671 | 4.02567E-06 | 0.006283423 |
| 1560.87997 | 178.109131 | 4.01968E-06 | 0.00627423  |
| 1560.91997 | 167.167643 | 3.77274E-06 | 0.005888947 |
| 1560.95997 | 159.006226 | 3.58855E-06 | 0.005601581 |
| 1560.99997 | 171.017954 | 3.85964E-06 | 0.006024893 |
| 1561.03997 | 172.763049 | 3.89902E-06 | 0.006086528 |
| 1561.07997 | 164.319894 | 3.70847E-06 | 0.00578922  |
| 1561.11997 | 171.444722 | 3.86927E-06 | 0.006040392 |
| 1561.15997 | 171.844254 | 3.87829E-06 | 0.006054624 |
| 1561.19997 | 159.409913 | 3.59766E-06 | 0.005616666 |
| 1561.23997 | 162.565342 | 3.66887E-06 | 0.005727992 |
| 1561.27997 | 181.806226 | 4.10311E-06 | 0.006406109 |



|            |            |             |             |
|------------|------------|-------------|-------------|
| 1561.31997 | 186.792909 | 4.21566E-06 | 0.006581988 |
| 1561.35997 | 190.955195 | 4.30959E-06 | 0.006728826 |
| 1561.39997 | 193.14063  | 4.35891E-06 | 0.00680601  |
| 1561.43997 | 182.947383 | 4.12887E-06 | 0.006446979 |
| 1561.47997 | 163.560471 | 3.69133E-06 | 0.005763941 |
| 1561.51997 | 143.417355 | 3.23673E-06 | 0.005054218 |
| 1561.55997 | 133.163569 | 3.00532E-06 | 0.004692982 |
| 1561.59997 | 124.650819 | 2.8132E-06  | 0.004393086 |
| 1561.63997 | 133.973543 | 3.0236E-06  | 0.004721769 |
| 1561.67997 | 137.278448 | 3.09818E-06 | 0.004838371 |
| 1561.71997 | 148.253481 | 3.34587E-06 | 0.005225319 |
| 1561.75997 | 158.015536 | 3.56619E-06 | 0.005569534 |
| 1561.79997 | 158.800525 | 3.58391E-06 | 0.005597345 |
| 1561.83997 | 150.097101 | 3.38748E-06 | 0.005290706 |
| 1561.87997 | 159.065767 | 3.58989E-06 | 0.005606982 |
| 1561.91997 | 173.000758 | 3.90439E-06 | 0.006098339 |
| 1561.95997 | 171.39074  | 3.86805E-06 | 0.00604174  |
| 1561.99997 | 158.584272 | 3.57903E-06 | 0.005590439 |
| 1562.03997 | 141.312235 | 3.18922E-06 | 0.00498169  |
| 1562.07997 | 141.970525 | 3.20408E-06 | 0.005005025 |
| 1562.11997 | 154.452938 | 3.48579E-06 | 0.005445219 |
| 1562.15997 | 169.982607 | 3.83627E-06 | 0.005992868 |
| 1562.19997 | 159.51912  | 3.60012E-06 | 0.005624114 |
| 1562.23997 | 159.255435 | 3.59417E-06 | 0.005614961 |
| 1562.27997 | 187.481307 | 4.23119E-06 | 0.006610306 |
| 1562.31997 | 215.014801 | 4.85258E-06 | 0.00758129  |
| 1562.35997 | 219.016382 | 4.94289E-06 | 0.007722581 |
| 1562.39997 | 204.387638 | 4.61274E-06 | 0.007206952 |
| 1562.43997 | 178.474505 | 4.02792E-06 | 0.006293385 |
| 1562.47997 | 162.190175 | 3.66041E-06 | 0.005719312 |
| 1562.51997 | 152.996657 | 3.45292E-06 | 0.005395259 |
| 1562.55997 | 139.237927 | 3.14241E-06 | 0.004910198 |
| 1562.59997 | 151.758069 | 3.42497E-06 | 0.005351855 |
| 1562.63997 | 171.548989 | 3.87162E-06 | 0.006049951 |
| 1562.67997 | 193.847637 | 4.37487E-06 | 0.006836524 |
| 1562.71997 | 198.144695 | 4.47185E-06 | 0.006988249 |
| 1562.75997 | 153.431252 | 3.46273E-06 | 0.005411415 |
| 1562.79997 | 120.464497 | 2.71872E-06 | 0.004248809 |
| 1562.83997 | 133.969923 | 3.02351E-06 | 0.004725269 |
| 1562.87997 | 141.686814 | 3.19767E-06 | 0.004997581 |
| 1562.91997 | 138.443565 | 3.12448E-06 | 0.00488331  |
| 1562.95997 | 140.452608 | 3.16982E-06 | 0.004954301 |
| 1562.99997 | 148.40665  | 3.34933E-06 | 0.005235005 |
| 1563.03997 | 156.744649 | 3.53751E-06 | 0.005529267 |
| 1563.07997 | 162.334396 | 3.66366E-06 | 0.005726595 |
| 1563.11997 | 164.679174 | 3.71658E-06 | 0.00580946  |

|             |            |             |             |
|-------------|------------|-------------|-------------|
| 1563.15997  | 174.916242 | 3.94762E-06 | 0.006170755 |
| 1563.19997  | 173.025523 | 3.90495E-06 | 0.00610421  |
| 1563.23997  | 168.243607 | 3.79702E-06 | 0.005935659 |
| 1563.27997  | 173.606292 | 3.91805E-06 | 0.006125013 |
| 1563.31997  | 170.57502  | 3.84964E-06 | 0.00601822  |
| 1563.35997  | 166.760623 | 3.76355E-06 | 0.005883791 |
| 1563.39997  | 150.168634 | 3.3891E-06  | 0.005298514 |
| 1563.43997  | 139.16682  | 3.1408E-06  | 0.004910454 |
| 1563.47997  | 152.095535 | 3.43258E-06 | 0.005366777 |
| 1563.51997  | 173.516982 | 3.91604E-06 | 0.006122801 |
| 1563.55997  | 162.838594 | 3.67504E-06 | 0.005746146 |
| 1563.59997  | 133.593185 | 3.01501E-06 | 0.004714273 |
| 1563.63997  | 115.640433 | 2.60984E-06 | 0.004080856 |
| 1563.67997  | 122.222196 | 2.75838E-06 | 0.004313231 |
| 1563.71997  | 141.350012 | 3.19007E-06 | 0.004988381 |
| 1563.75997  | 161.629905 | 3.64776E-06 | 0.005704224 |
| 1563.79997  | 164.317481 | 3.70842E-06 | 0.005799222 |
| 1563.83997  | 157.54047  | 3.55547E-06 | 0.005560184 |
| 1563.87997  | 167.558741 | 3.78157E-06 | 0.005913918 |
| 1563.91997  | 173.940731 | 3.9256E-06  | 0.006139324 |
| 1563.95997  | 165.609538 | 3.73758E-06 | 0.00584542  |
| 1563.99997  | 143.963358 | 3.24905E-06 | 0.005081518 |
| 1564.03997  | 155.259353 | 3.50399E-06 | 0.005480376 |
| 1564.07997  | 172.994711 | 3.90425E-06 | 0.006106559 |
| 1564.11997  | 161.145133 | 3.63682E-06 | 0.005688425 |
| 1564.15997  | 135.674131 | 3.06198E-06 | 0.004789421 |
| 1564.19997  | 128.409018 | 2.89801E-06 | 0.004533071 |
| 1564.23997  | 145.107153 | 3.27487E-06 | 0.005122677 |
| 1564.27997  | 163.550624 | 3.69111E-06 | 0.005773929 |
| 1564.31997  | 162.601255 | 3.66968E-06 | 0.00574056  |
| 1564.35997  | 155.415893 | 3.50752E-06 | 0.005487024 |
| 1564.39997  | 160.815526 | 3.62938E-06 | 0.005677806 |
| 1564.43997  | 153.597748 | 3.46649E-06 | 0.005423111 |
| 1564.47997  | 126.096026 | 2.84581E-06 | 0.004452215 |
| 1564.51997  | 124.754093 | 2.81553E-06 | 0.004404947 |
| 1564.559969 | 142.766433 | 3.22204E-06 | 0.005041074 |
| 1564.599969 | 140.426556 | 3.16923E-06 | 0.00495858  |
| 1564.639969 | 122.38238  | 2.762E-06   | 0.004321535 |
| 1564.679969 | 122.161263 | 2.75701E-06 | 0.004313838 |
| 1564.719969 | 129.588335 | 2.92463E-06 | 0.004576224 |
| 1564.759969 | 141.308561 | 3.18914E-06 | 0.004990235 |
| 1564.799969 | 142.861628 | 3.22419E-06 | 0.005045209 |
| 1564.839969 | 134.588229 | 3.03747E-06 | 0.004753153 |
| 1564.879969 | 135.166548 | 3.05052E-06 | 0.004773699 |
| 1564.919969 | 144.271766 | 3.25601E-06 | 0.005095399 |
| 1564.959969 | 152.322166 | 3.4377E-06  | 0.005379862 |

|             |            |             |             |
|-------------|------------|-------------|-------------|
| 1564.999969 | 144.701123 | 3.2657E-06  | 0.005110825 |
| 1565.039969 | 135.656179 | 3.06157E-06 | 0.004791481 |
| 1565.079969 | 140.504065 | 3.17098E-06 | 0.004962839 |
| 1565.119969 | 143.95228  | 3.2488E-06  | 0.005084766 |
| 1565.159969 | 149.975993 | 3.38475E-06 | 0.005297674 |
| 1565.199969 | 164.045314 | 3.70227E-06 | 0.0057948   |
| 1565.239969 | 185.736204 | 4.19181E-06 | 0.006561185 |
| 1565.279969 | 212.300105 | 4.79132E-06 | 0.007499754 |
| 1565.319969 | 216.770698 | 4.89221E-06 | 0.007657878 |
| 1565.359969 | 223.411626 | 5.04209E-06 | 0.007892685 |
| 1565.399969 | 201.239475 | 4.54169E-06 | 0.007109569 |
| 1565.439969 | 161.844818 | 3.65261E-06 | 0.005717945 |
| 1565.479969 | 145.138354 | 3.27557E-06 | 0.00512784  |
| 1565.519969 | 140.645609 | 3.17418E-06 | 0.004969235 |
| 1565.559969 | 148.348905 | 3.34803E-06 | 0.005241539 |
| 1565.599969 | 170.065421 | 3.83814E-06 | 0.006008991 |
| 1565.639969 | 165.808375 | 3.74206E-06 | 0.005858725 |
| 1565.679969 | 148.63387  | 3.35446E-06 | 0.00525201  |
| 1565.719969 | 134.458328 | 3.03454E-06 | 0.004751235 |
| 1565.759969 | 123.950137 | 2.79738E-06 | 0.004380029 |
| 1565.799969 | 124.956421 | 2.82009E-06 | 0.004415701 |
| 1565.839969 | 142.873388 | 3.22445E-06 | 0.005048978 |
| 1565.879969 | 159.390474 | 3.59722E-06 | 0.005632816 |
| 1565.919969 | 141.332456 | 3.18968E-06 | 0.004994778 |
| 1565.959969 | 123.462816 | 2.78638E-06 | 0.004363365 |
| 1565.999969 | 126.94531  | 2.86498E-06 | 0.004486557 |
| 1566.039969 | 119.582649 | 2.69881E-06 | 0.00422645  |
| 1566.079969 | 123.184786 | 2.78011E-06 | 0.004353873 |
| 1566.119969 | 145.668569 | 3.28754E-06 | 0.005148677 |
| 1566.159969 | 166.100562 | 3.74866E-06 | 0.005870999 |
| 1566.199969 | 184.459858 | 4.163E-06   | 0.006520094 |
| 1566.239969 | 194.725539 | 4.39468E-06 | 0.00688313  |
| 1566.279969 | 186.833137 | 4.21656E-06 | 0.006604319 |
| 1566.319969 | 183.187982 | 4.1343E-06  | 0.006475633 |
| 1566.359969 | 207.588914 | 4.68499E-06 | 0.007338385 |
| 1566.399969 | 198.02871  | 4.46923E-06 | 0.007000605 |
| 1566.439969 | 191.31896  | 4.3178E-06  | 0.006763578 |
| 1566.479969 | 168.197511 | 3.79598E-06 | 0.005946332 |
| 1566.519969 | 155.328487 | 3.50555E-06 | 0.00549151  |
| 1566.559969 | 150.525525 | 3.39715E-06 | 0.005321841 |
| 1566.599969 | 137.124379 | 3.09471E-06 | 0.004848167 |
| 1566.639969 | 139.291242 | 3.14361E-06 | 0.004924904 |
| 1566.679969 | 137.663601 | 3.10688E-06 | 0.00486748  |
| 1566.719969 | 129.831775 | 2.93012E-06 | 0.004590681 |
| 1566.759969 | 133.708831 | 3.01762E-06 | 0.004727889 |
| 1566.799969 | 170.127196 | 3.83953E-06 | 0.006015782 |

|             |            |             |             |
|-------------|------------|-------------|-------------|
| 1566.839969 | 187.135179 | 4.22338E-06 | 0.006617361 |
| 1566.879969 | 172.031546 | 3.88251E-06 | 0.006083431 |
| 1566.919969 | 153.104676 | 3.45536E-06 | 0.005414271 |
| 1566.959969 | 152.308066 | 3.43738E-06 | 0.005386238 |
| 1566.999969 | 159.722952 | 3.60472E-06 | 0.005648603 |
| 1567.039969 | 164.087727 | 3.70323E-06 | 0.005803112 |
| 1567.079969 | 158.217341 | 3.57075E-06 | 0.005595643 |
| 1567.119969 | 147.938174 | 3.33876E-06 | 0.005232235 |
| 1567.159969 | 147.452071 | 3.32779E-06 | 0.005215176 |
| 1567.199969 | 148.522011 | 3.35193E-06 | 0.005253152 |
| 1567.239969 | 147.993104 | 3.34E-06    | 0.005234579 |
| 1567.279969 | 154.910926 | 3.49612E-06 | 0.005479405 |
| 1567.319969 | 159.871479 | 3.60808E-06 | 0.005655011 |
| 1567.359969 | 177.859157 | 4.01403E-06 | 0.006291435 |
| 1567.399969 | 176.803491 | 3.99021E-06 | 0.006254253 |
| 1567.439969 | 160.481744 | 3.62185E-06 | 0.005677032 |
| 1567.479969 | 156.198869 | 3.52519E-06 | 0.005525666 |
| 1567.519969 | 152.050928 | 3.43158E-06 | 0.005379067 |
| 1567.559969 | 141.408235 | 3.19139E-06 | 0.00500269  |
| 1567.599969 | 128.207844 | 2.89347E-06 | 0.004535807 |
| 1567.639969 | 120.766891 | 2.72554E-06 | 0.004272666 |
| 1567.679969 | 139.964921 | 3.15881E-06 | 0.004952008 |
| 1567.719969 | 149.856225 | 3.38205E-06 | 0.005302101 |
| 1567.759969 | 155.705271 | 3.51405E-06 | 0.005509189 |
| 1567.799969 | 169.563777 | 3.82682E-06 | 0.005999686 |
| 1567.839969 | 171.401933 | 3.8683E-06  | 0.00606488  |
| 1567.879969 | 162.73543  | 3.67271E-06 | 0.005758372 |
| 1567.919969 | 161.464703 | 3.64403E-06 | 0.005713553 |
| 1567.959969 | 144.128375 | 3.25278E-06 | 0.005100224 |
| 1567.999969 | 137.302588 | 3.09873E-06 | 0.004858806 |
| 1568.039969 | 149.306749 | 3.36965E-06 | 0.005283739 |
| 1568.079969 | 159.824656 | 3.60702E-06 | 0.005656096 |
| 1568.119969 | 149.868102 | 3.38231E-06 | 0.005303875 |
| 1568.159969 | 150.58583  | 3.39851E-06 | 0.005329411 |
| 1568.199969 | 169.79153  | 3.83196E-06 | 0.006009277 |
| 1568.239969 | 166.463014 | 3.75684E-06 | 0.005891624 |
| 1568.279969 | 199.413191 | 4.50048E-06 | 0.007058009 |
| 1568.319969 | 229.769981 | 5.18559E-06 | 0.008132662 |
| 1568.359969 | 233.021123 | 5.25896E-06 | 0.008247946 |
| 1568.399969 | 220.981454 | 4.98724E-06 | 0.007821993 |
| 1568.439969 | 200.304477 | 4.52059E-06 | 0.007090279 |
| 1568.479969 | 183.434293 | 4.13986E-06 | 0.006493282 |
| 1568.519969 | 151.437451 | 3.41773E-06 | 0.005360781 |
| 1568.559969 | 140.187897 | 3.16385E-06 | 0.004962682 |
| 1568.599969 | 156.62537  | 3.53482E-06 | 0.005544713 |
| 1568.639969 | 148.060304 | 3.34151E-06 | 0.005241634 |

|             |            |             |             |
|-------------|------------|-------------|-------------|
| 1568.679969 | 143.344724 | 3.23509E-06 | 0.005074822 |
| 1568.719969 | 142.040876 | 3.20566E-06 | 0.00502879  |
| 1568.759969 | 131.985678 | 2.97873E-06 | 0.004672917 |
| 1568.799969 | 151.909385 | 3.42838E-06 | 0.005378448 |
| 1568.839969 | 176.152334 | 3.97551E-06 | 0.006236943 |
| 1568.879969 | 159.710063 | 3.60443E-06 | 0.005654924 |
| 1568.919969 | 133.306418 | 3.00854E-06 | 0.004720159 |
| 1568.959969 | 148.613607 | 3.354E-06   | 0.005262295 |
| 1568.999969 | 179.764997 | 4.05705E-06 | 0.006365504 |
| 1569.039969 | 186.639801 | 4.2122E-06  | 0.006609111 |
| 1569.079969 | 191.451137 | 4.32079E-06 | 0.006779658 |
| 1569.119969 | 179.290015 | 4.04633E-06 | 0.006349171 |
| 1569.159969 | 180.606057 | 4.07603E-06 | 0.006395939 |
| 1569.199969 | 181.464198 | 4.09539E-06 | 0.006426492 |
| 1569.239969 | 195.200687 | 4.40541E-06 | 0.006913142 |
| 1569.279969 | 192.455451 | 4.34345E-06 | 0.006816091 |
| 1569.319969 | 202.091786 | 4.56093E-06 | 0.007157559 |
| 1569.359969 | 208.142097 | 4.69748E-06 | 0.007372033 |
| 1569.399969 | 215.270046 | 4.85835E-06 | 0.007624687 |
| 1569.439969 | 191.642537 | 4.32511E-06 | 0.006787993 |
| 1569.479969 | 150.786029 | 3.40303E-06 | 0.005340988 |
| 1569.519969 | 146.241798 | 3.30047E-06 | 0.005180159 |
| 1569.559969 | 152.517143 | 3.4421E-06  | 0.005402582 |
| 1569.599969 | 154.799363 | 3.49361E-06 | 0.005483564 |
| 1569.639969 | 152.062475 | 3.43184E-06 | 0.00538675  |
| 1569.679969 | 141.162321 | 3.18584E-06 | 0.005000744 |
| 1569.719969 | 127.977307 | 2.88827E-06 | 0.004533774 |
| 1569.759969 | 125.190084 | 2.82537E-06 | 0.004435146 |
| 1569.799969 | 136.434247 | 3.07913E-06 | 0.00483362  |
| 1569.839969 | 158.808498 | 3.58409E-06 | 0.005626442 |
| 1569.879969 | 156.982351 | 3.54287E-06 | 0.005561885 |
| 1569.919969 | 153.395581 | 3.46192E-06 | 0.005434945 |
| 1569.959969 | 156.663784 | 3.53568E-06 | 0.005550881 |
| 1569.999969 | 162.91609  | 3.67679E-06 | 0.005772559 |
| 1570.039969 | 148.814262 | 3.35853E-06 | 0.005273027 |
| 1570.079969 | 145.791388 | 3.29031E-06 | 0.005166048 |
| 1570.119969 | 149.935101 | 3.38383E-06 | 0.005313013 |
| 1570.159969 | 149.292385 | 3.36932E-06 | 0.005290373 |
| 1570.199969 | 155.237758 | 3.5035E-06  | 0.005501196 |
| 1570.239969 | 168.633025 | 3.80581E-06 | 0.005976039 |
| 1570.279969 | 193.498024 | 4.36698E-06 | 0.006857383 |
| 1570.319969 | 207.832986 | 4.6905E-06  | 0.007365587 |
| 1570.359969 | 208.464282 | 4.70475E-06 | 0.007388149 |
| 1570.399969 | 202.566647 | 4.57165E-06 | 0.007179314 |
| 1570.439969 | 186.688532 | 4.2133E-06  | 0.006616735 |
| 1570.479969 | 155.302515 | 3.50496E-06 | 0.005504472 |

|             |            |             |             |
|-------------|------------|-------------|-------------|
| 1570.519969 | 163.185924 | 3.68288E-06 | 0.005784035 |
| 1570.559969 | 171.810674 | 3.87753E-06 | 0.00608989  |
| 1570.599969 | 162.44713  | 3.66621E-06 | 0.005758142 |
| 1570.639969 | 146.064768 | 3.29648E-06 | 0.005177581 |
| 1570.679969 | 145.01935  | 3.27288E-06 | 0.005140654 |
| 1570.719969 | 149.027001 | 3.36333E-06 | 0.005282852 |
| 1570.759969 | 161.444806 | 3.64358E-06 | 0.005723197 |
| 1570.799969 | 165.52463  | 3.73566E-06 | 0.005867975 |
| 1570.839969 | 162.74647  | 3.67296E-06 | 0.005769634 |
| 1570.879969 | 164.463672 | 3.71172E-06 | 0.00583066  |
| 1570.919969 | 156.409631 | 3.52995E-06 | 0.005545265 |
| 1570.959969 | 147.128019 | 3.32047E-06 | 0.005216332 |
| 1570.999969 | 142.620527 | 3.21875E-06 | 0.005056651 |
| 1571.039969 | 142.708044 | 3.22072E-06 | 0.005059883 |
| 1571.079969 | 141.751867 | 3.19914E-06 | 0.005026108 |
| 1571.119969 | 139.128544 | 3.13994E-06 | 0.004933218 |
| 1571.159969 | 150.343215 | 3.39304E-06 | 0.005331004 |
| 1571.199969 | 169.886312 | 3.8341E-06  | 0.006024134 |
| 1571.239969 | 168.095314 | 3.79368E-06 | 0.005960777 |
| 1571.279969 | 175.298027 | 3.95623E-06 | 0.006216349 |
| 1571.319969 | 191.711921 | 4.32667E-06 | 0.006798585 |
| 1571.359969 | 183.460379 | 4.14045E-06 | 0.00650613  |
| 1571.399969 | 180.606951 | 4.07605E-06 | 0.006405101 |
| 1571.439969 | 178.354236 | 4.02521E-06 | 0.006325371 |
| 1571.479969 | 169.850316 | 3.83329E-06 | 0.006023931 |
| 1571.519969 | 158.632129 | 3.58011E-06 | 0.005626208 |
| 1571.559969 | 149.849417 | 3.38189E-06 | 0.005314847 |
| 1571.599969 | 139.648149 | 3.15166E-06 | 0.004953155 |
| 1571.639969 | 136.785501 | 3.08706E-06 | 0.004851744 |
| 1571.679969 | 138.833042 | 3.13327E-06 | 0.004924495 |
| 1571.719969 | 148.198806 | 3.34464E-06 | 0.005256838 |
| 1571.759969 | 144.121707 | 3.25263E-06 | 0.005112348 |
| 1571.799969 | 146.698908 | 3.31079E-06 | 0.0052039   |
| 1571.839969 | 161.406576 | 3.64272E-06 | 0.005725775 |
| 1571.879969 | 182.27705  | 4.11374E-06 | 0.006466304 |
| 1571.919969 | 179.724423 | 4.05613E-06 | 0.006375912 |
| 1571.959969 | 152.967136 | 3.45226E-06 | 0.005426807 |
| 1571.999969 | 135.705664 | 3.06269E-06 | 0.004814545 |
| 1572.039969 | 143.042588 | 3.22827E-06 | 0.005074973 |
| 1572.079969 | 146.898104 | 3.31529E-06 | 0.005211894 |
| 1572.119969 | 147.691599 | 3.33319E-06 | 0.00524018  |
| 1572.159969 | 155.14137  | 3.50132E-06 | 0.005504642 |
| 1572.199969 | 153.761258 | 3.47018E-06 | 0.005455813 |
| 1572.239969 | 144.706509 | 3.26582E-06 | 0.00513466  |
| 1572.279969 | 154.279112 | 3.48186E-06 | 0.005474466 |
| 1572.319969 | 171.689308 | 3.87479E-06 | 0.006092407 |

|             |            |             |             |
|-------------|------------|-------------|-------------|
| 1572.359969 | 159.390114 | 3.59721E-06 | 0.005656114 |
| 1572.399969 | 165.085683 | 3.72575E-06 | 0.005858375 |
| 1572.439969 | 180.269747 | 4.06844E-06 | 0.006397373 |
| 1572.479969 | 174.219419 | 3.93189E-06 | 0.006182818 |
| 1572.519969 | 153.496199 | 3.4642E-06  | 0.005447516 |
| 1572.559969 | 141.71533  | 3.19832E-06 | 0.005029546 |
| 1572.599969 | 146.593197 | 3.3084E-06  | 0.005202796 |
| 1572.639969 | 147.629057 | 3.33178E-06 | 0.005239694 |
| 1572.679969 | 136.466566 | 3.07986E-06 | 0.004843635 |
| 1572.719969 | 139.368332 | 3.14535E-06 | 0.004946753 |
| 1572.759969 | 130.717259 | 2.95011E-06 | 0.004639809 |
| 1572.799969 | 129.407045 | 2.92054E-06 | 0.00459342  |
| 1572.839969 | 144.904204 | 3.27029E-06 | 0.005143637 |
| 1572.879969 | 151.938219 | 3.42903E-06 | 0.005393459 |
| 1572.919969 | 152.81182  | 3.44875E-06 | 0.005424608 |
| 1572.959969 | 157.503867 | 3.55464E-06 | 0.005591311 |
| 1572.999969 | 156.751725 | 3.53767E-06 | 0.005564752 |
| 1573.039969 | 146.807632 | 3.31324E-06 | 0.005211865 |
| 1573.079969 | 133.94977  | 3.02306E-06 | 0.004755515 |
| 1573.119969 | 133.906673 | 3.02209E-06 | 0.004754106 |
| 1573.159969 | 141.362463 | 3.19035E-06 | 0.005018937 |
| 1573.199969 | 148.809724 | 3.35843E-06 | 0.005283479 |
| 1573.239969 | 165.331098 | 3.73129E-06 | 0.005870219 |
| 1573.279969 | 175.619847 | 3.9635E-06  | 0.006235688 |
| 1573.319969 | 157.424778 | 3.55286E-06 | 0.005589782 |
| 1573.359969 | 142.00236  | 3.2048E-06  | 0.005042297 |
| 1573.399969 | 136.501621 | 3.08065E-06 | 0.004847097 |
| 1573.439969 | 151.708162 | 3.42384E-06 | 0.00538721  |
| 1573.479969 | 160.682739 | 3.62639E-06 | 0.005706045 |
| 1573.519969 | 155.243424 | 3.50363E-06 | 0.005513028 |
| 1573.559969 | 153.990507 | 3.47535E-06 | 0.005468674 |
| 1573.599969 | 143.696641 | 3.24303E-06 | 0.005103237 |
| 1573.639969 | 146.972417 | 3.31696E-06 | 0.005219705 |
| 1573.679969 | 151.345123 | 3.41565E-06 | 0.005375138 |
| 1573.719969 | 150.27089  | 3.3914E-06  | 0.005337121 |
| 1573.759969 | 146.394591 | 3.30392E-06 | 0.00519958  |
| 1573.799969 | 140.170888 | 3.16346E-06 | 0.004978656 |
| 1573.839969 | 133.884789 | 3.02159E-06 | 0.004755504 |
| 1573.879969 | 136.075708 | 3.07104E-06 | 0.004833447 |
| 1573.919969 | 141.655401 | 3.19697E-06 | 0.005031767 |
| 1573.959969 | 153.076434 | 3.45472E-06 | 0.005437594 |
| 1573.999969 | 145.303704 | 3.2793E-06  | 0.005161622 |
| 1574.039969 | 150.090235 | 3.38733E-06 | 0.005331789 |
| 1574.079969 | 159.823208 | 3.60699E-06 | 0.005677686 |
| 1574.119969 | 169.126995 | 3.81696E-06 | 0.006008354 |
| 1574.159969 | 175.936531 | 3.97064E-06 | 0.006250426 |

|             |            |             |             |
|-------------|------------|-------------|-------------|
| 1574.199969 | 164.633098 | 3.71554E-06 | 0.005849002 |
| 1574.239969 | 157.941591 | 3.56452E-06 | 0.005611413 |
| 1574.279969 | 150.420077 | 3.39477E-06 | 0.005344321 |
| 1574.319969 | 139.03561  | 3.13784E-06 | 0.004939964 |
| 1574.359969 | 130.387653 | 2.94267E-06 | 0.004632818 |
| 1574.399969 | 129.888789 | 2.93141E-06 | 0.00461521  |
| 1574.439969 | 131.187604 | 2.96072E-06 | 0.004661478 |
| 1574.479969 | 144.222782 | 3.25491E-06 | 0.005124786 |
| 1574.519969 | 153.840804 | 3.47197E-06 | 0.00546669  |
| 1574.559969 | 144.273045 | 3.25604E-06 | 0.005126833 |
| 1574.599969 | 133.280034 | 3.00794E-06 | 0.00473631  |
| 1574.639969 | 129.068309 | 2.91289E-06 | 0.004586756 |
| 1574.679969 | 114.584487 | 2.58601E-06 | 0.004072142 |
| 1574.719969 | 110.527987 | 2.49446E-06 | 0.00392808  |
| 1574.759969 | 117.666925 | 2.65558E-06 | 0.004181899 |
| 1574.799969 | 131.613452 | 2.97033E-06 | 0.004677679 |
| 1574.839969 | 128.535664 | 2.90087E-06 | 0.004568407 |
| 1574.879969 | 130.452555 | 2.94413E-06 | 0.004636655 |
| 1574.919969 | 146.47287  | 3.30569E-06 | 0.005206195 |
| 1574.959969 | 157.912751 | 3.56387E-06 | 0.005612954 |
| 1574.999969 | 146.949587 | 3.31645E-06 | 0.005223405 |
| 1575.039969 | 140.320045 | 3.16683E-06 | 0.004987881 |
| 1575.079969 | 158.379756 | 3.57441E-06 | 0.005629982 |
| 1575.119969 | 173.386877 | 3.9131E-06  | 0.006163602 |
| 1575.159969 | 187.89777  | 4.24059E-06 | 0.006679609 |
| 1575.199969 | 207.107999 | 4.67414E-06 | 0.007362704 |
| 1575.239969 | 191.018447 | 4.31102E-06 | 0.006790891 |
| 1575.279969 | 161.034244 | 3.63432E-06 | 0.005725069 |
| 1575.319969 | 173.932639 | 3.92542E-06 | 0.006183788 |
| 1575.359969 | 184.96413  | 4.17438E-06 | 0.006576156 |
| 1575.399969 | 190.989235 | 4.31036E-06 | 0.006790543 |
| 1575.439969 | 183.803299 | 4.14818E-06 | 0.006535216 |
| 1575.479969 | 178.730027 | 4.03369E-06 | 0.006354994 |
| 1575.519969 | 162.398715 | 3.66511E-06 | 0.005774458 |
| 1575.559969 | 124.263299 | 2.80445E-06 | 0.004418578 |
| 1575.599969 | 114.151098 | 2.57623E-06 | 0.00405911  |
| 1575.639969 | 136.103237 | 3.07166E-06 | 0.004839831 |
| 1575.679969 | 127.878471 | 2.88604E-06 | 0.004547474 |
| 1575.719969 | 123.13117  | 2.7789E-06  | 0.004378767 |
| 1575.759969 | 123.879467 | 2.79579E-06 | 0.004405489 |
| 1575.799969 | 135.953042 | 3.06827E-06 | 0.004834981 |
| 1575.839969 | 150.531512 | 3.39729E-06 | 0.00535358  |
| 1575.879969 | 151.262086 | 3.41377E-06 | 0.005379699 |
| 1575.919969 | 148.962136 | 3.36187E-06 | 0.005298035 |
| 1575.959969 | 146.306376 | 3.30193E-06 | 0.005203711 |
| 1575.999969 | 150.744573 | 3.4021E-06  | 0.005361702 |



|             |            |             |             |
|-------------|------------|-------------|-------------|
| 1576.039969 | 137.042546 | 3.09286E-06 | 0.00487447  |
| 1576.079969 | 126.620218 | 2.85764E-06 | 0.004503872 |
| 1576.119969 | 137.489604 | 3.10295E-06 | 0.00489062  |
| 1576.159969 | 161.367566 | 3.64184E-06 | 0.005740124 |
| 1576.199969 | 181.737441 | 4.10156E-06 | 0.00646488  |
| 1576.239969 | 204.758556 | 4.62112E-06 | 0.007283987 |
| 1576.279969 | 199.792594 | 4.50904E-06 | 0.00710751  |
| 1576.319969 | 181.69028  | 4.1005E-06  | 0.006463695 |
| 1576.359969 | 179.991963 | 4.06217E-06 | 0.006403439 |
| 1576.399969 | 197.110013 | 4.4485E-06  | 0.007012613 |
| 1576.439969 | 192.019295 | 4.33361E-06 | 0.006831673 |
| 1576.479969 | 148.748814 | 3.35705E-06 | 0.005292328 |
| 1576.519969 | 125.759249 | 2.83821E-06 | 0.004474496 |
| 1576.559969 | 139.282709 | 3.14342E-06 | 0.004955785 |
| 1576.599969 | 145.553505 | 3.28494E-06 | 0.005179036 |
| 1576.639969 | 145.386738 | 3.28118E-06 | 0.005173233 |
| 1576.679969 | 138.76043  | 3.13163E-06 | 0.004937578 |
| 1576.719969 | 144.336311 | 3.25747E-06 | 0.005136117 |
| 1576.759969 | 162.344541 | 3.66389E-06 | 0.005777075 |
| 1576.799969 | 173.561447 | 3.91704E-06 | 0.006176389 |
| 1576.839969 | 171.206392 | 3.86389E-06 | 0.006092736 |
| 1576.879969 | 173.62228  | 3.91841E-06 | 0.006178867 |
| 1576.919969 | 178.506779 | 4.02865E-06 | 0.006352858 |
| 1576.959969 | 187.68036  | 4.23568E-06 | 0.006679505 |
| 1576.999969 | 176.110351 | 3.97457E-06 | 0.006267889 |
| 1577.039969 | 161.500649 | 3.64484E-06 | 0.005748066 |
| 1577.079969 | 149.987331 | 3.38501E-06 | 0.005338424 |
| 1577.119969 | 129.031775 | 2.91207E-06 | 0.00459268  |
| 1577.159969 | 130.216562 | 2.93881E-06 | 0.004634968 |
| 1577.199969 | 167.479474 | 3.77978E-06 | 0.005961466 |
| 1577.239969 | 191.66014  | 4.3255E-06  | 0.006822355 |
| 1577.279969 | 169.496366 | 3.8253E-06  | 0.006033564 |
| 1577.319969 | 145.975322 | 3.29446E-06 | 0.005196417 |
| 1577.359969 | 158.485796 | 3.5768E-06  | 0.005641907 |
| 1577.399969 | 179.947783 | 4.06117E-06 | 0.006406091 |
| 1577.439969 | 171.192666 | 3.86358E-06 | 0.006094566 |
| 1577.479969 | 170.782543 | 3.85432E-06 | 0.006080119 |
| 1577.519969 | 177.672612 | 4.00982E-06 | 0.006325576 |
| 1577.559969 | 163.093737 | 3.6808E-06  | 0.00580668  |
| 1577.599969 | 157.240686 | 3.5487E-06  | 0.005598434 |
| 1577.639969 | 161.614876 | 3.64742E-06 | 0.00575432  |
| 1577.679969 | 159.369824 | 3.59675E-06 | 0.005674528 |
| 1577.719969 | 160.024282 | 3.61153E-06 | 0.005697975 |
| 1577.759969 | 157.476379 | 3.55402E-06 | 0.005607394 |
| 1577.799969 | 158.958318 | 3.58747E-06 | 0.005660307 |
| 1577.839969 | 161.365902 | 3.6418E-06  | 0.005746183 |

|             |            |             |             |
|-------------|------------|-------------|-------------|
| 1577.879969 | 159.861336 | 3.60785E-06 | 0.005692751 |
| 1577.919969 | 157.960335 | 3.56494E-06 | 0.005625197 |
| 1577.959969 | 137.514806 | 3.10352E-06 | 0.004897227 |
| 1577.999969 | 123.621664 | 2.78997E-06 | 0.004402571 |
| 1578.039969 | 130.897028 | 2.95416E-06 | 0.004661788 |
| 1578.079969 | 150.487108 | 3.39628E-06 | 0.005359608 |
| 1578.119969 | 159.666047 | 3.60344E-06 | 0.005686661 |
| 1578.159969 | 175.117429 | 3.95216E-06 | 0.006237135 |
| 1578.199969 | 196.934775 | 4.44454E-06 | 0.007014379 |
| 1578.239969 | 184.923636 | 4.17347E-06 | 0.006586735 |
| 1578.279969 | 165.764088 | 3.74106E-06 | 0.005904447 |
| 1578.319969 | 177.043645 | 3.99563E-06 | 0.00630638  |
| 1578.359969 | 174.796072 | 3.9449E-06  | 0.006226478 |
| 1578.399969 | 149.19131  | 3.36704E-06 | 0.005314536 |
| 1578.439969 | 135.924984 | 3.06764E-06 | 0.004842082 |
| 1578.479969 | 150.798198 | 3.40331E-06 | 0.005372049 |
| 1578.519969 | 146.511502 | 3.30656E-06 | 0.005219472 |
| 1578.559969 | 139.014494 | 3.13736E-06 | 0.004952516 |
| 1578.599969 | 130.973141 | 2.95588E-06 | 0.004666154 |
| 1578.639969 | 134.154713 | 3.02769E-06 | 0.004779625 |
| 1578.679969 | 154.215149 | 3.48042E-06 | 0.005494471 |
| 1578.719969 | 154.919579 | 3.49632E-06 | 0.005519709 |
| 1578.759969 | 137.462694 | 3.10234E-06 | 0.004897853 |
| 1578.799969 | 139.664584 | 3.15204E-06 | 0.004976433 |
| 1578.839969 | 153.972326 | 3.47494E-06 | 0.005486376 |
| 1578.879969 | 149.845806 | 3.38181E-06 | 0.005339474 |
| 1578.919969 | 134.120394 | 3.02691E-06 | 0.004779249 |
| 1578.959969 | 126.497895 | 2.85488E-06 | 0.004507743 |
| 1578.999969 | 123.466844 | 2.78647E-06 | 0.004399843 |
| 1579.039969 | 133.516633 | 3.01328E-06 | 0.004758097 |
| 1579.079969 | 162.628289 | 3.67029E-06 | 0.005795688 |
| 1579.119969 | 214.119228 | 4.83237E-06 | 0.007630896 |
| 1579.159969 | 228.445146 | 5.15569E-06 | 0.008141657 |
| 1579.199969 | 210.192642 | 4.74376E-06 | 0.007491338 |
| 1579.239969 | 188.409614 | 4.25214E-06 | 0.006715153 |
| 1579.279969 | 162.208446 | 3.66082E-06 | 0.005781458 |
| 1579.319969 | 167.753798 | 3.78597E-06 | 0.005979257 |
| 1579.359969 | 193.748817 | 4.37264E-06 | 0.006905974 |
| 1579.399969 | 184.159134 | 4.15622E-06 | 0.006564326 |
| 1579.439969 | 163.120034 | 3.68139E-06 | 0.005814538 |
| 1579.479969 | 153.265257 | 3.45898E-06 | 0.005463395 |
| 1579.519969 | 158.876241 | 3.58562E-06 | 0.005663551 |
| 1579.559969 | 165.637969 | 3.73822E-06 | 0.00590474  |
| 1579.599969 | 153.03359  | 3.45375E-06 | 0.005455551 |
| 1579.639969 | 136.381007 | 3.07793E-06 | 0.00486202  |
| 1579.679969 | 138.328762 | 3.12189E-06 | 0.004931583 |

|             |            |             |             |
|-------------|------------|-------------|-------------|
| 1579.719969 | 127.183584 | 2.87036E-06 | 0.004534359 |
| 1579.759969 | 114.672937 | 2.58801E-06 | 0.004088432 |
| 1579.799969 | 126.891606 | 2.86377E-06 | 0.004524179 |
| 1579.839969 | 131.120845 | 2.95921E-06 | 0.004675086 |
| 1579.879969 | 146.021964 | 3.29551E-06 | 0.005206514 |
| 1579.919969 | 161.334594 | 3.6411E-06  | 0.005752642 |
| 1579.959969 | 151.241977 | 3.41332E-06 | 0.00539291  |
| 1579.999969 | 148.592368 | 3.35352E-06 | 0.005298566 |
| 1580.039969 | 143.602207 | 3.2409E-06  | 0.005120754 |
| 1580.079969 | 146.518153 | 3.30671E-06 | 0.005224867 |
| 1580.119969 | 166.553758 | 3.75889E-06 | 0.005939491 |
| 1580.159969 | 173.480996 | 3.91522E-06 | 0.006186681 |
| 1580.199969 | 187.250047 | 4.22597E-06 | 0.006677882 |
| 1580.239969 | 201.143204 | 4.53952E-06 | 0.007173534 |
| 1580.279969 | 205.448225 | 4.63668E-06 | 0.007327253 |
| 1580.319969 | 202.395888 | 4.56779E-06 | 0.007218575 |
| 1580.359969 | 217.17944  | 4.90144E-06 | 0.007746036 |
| 1580.399969 | 201.397684 | 4.54527E-06 | 0.007183337 |
| 1580.439969 | 168.236434 | 3.79686E-06 | 0.006000712 |
| 1580.479969 | 148.878299 | 3.35998E-06 | 0.005310375 |
| 1580.519969 | 142.285997 | 3.2112E-06  | 0.005075361 |
| 1580.559969 | 155.035248 | 3.49893E-06 | 0.005530268 |
| 1580.599969 | 153.824371 | 3.4716E-06  | 0.005487214 |
| 1580.639969 | 136.826551 | 3.08798E-06 | 0.004880992 |
| 1580.679969 | 135.639666 | 3.0612E-06  | 0.004838775 |
| 1580.719969 | 145.608745 | 3.28619E-06 | 0.005194541 |
| 1580.759969 | 155.927428 | 3.51906E-06 | 0.005562797 |
| 1580.799969 | 151.64358  | 3.42238E-06 | 0.005410105 |
| 1580.839969 | 158.366462 | 3.57411E-06 | 0.005650097 |
| 1580.879969 | 172.591465 | 3.89515E-06 | 0.006157763 |
| 1580.919969 | 164.280074 | 3.70757E-06 | 0.005861375 |
| 1580.959969 | 143.910752 | 3.24787E-06 | 0.005134745 |
| 1580.999969 | 127.174305 | 2.87015E-06 | 0.004537702 |
| 1581.039969 | 131.437402 | 2.96636E-06 | 0.004689932 |
| 1581.079969 | 157.501495 | 3.55459E-06 | 0.00562009  |
| 1581.119969 | 162.005292 | 3.65623E-06 | 0.005780944 |
| 1581.159969 | 145.731665 | 3.28896E-06 | 0.005200373 |
| 1581.199969 | 139.345205 | 3.14483E-06 | 0.004972601 |
| 1581.239969 | 154.967552 | 3.4974E-06  | 0.005530232 |
| 1581.279969 | 183.56099  | 4.14272E-06 | 0.006550794 |
| 1581.319969 | 182.748917 | 4.12439E-06 | 0.006521978 |
| 1581.359969 | 177.325576 | 4.00199E-06 | 0.006328589 |
| 1581.399969 | 180.296229 | 4.06903E-06 | 0.006434771 |
| 1581.439969 | 166.294056 | 3.75303E-06 | 0.005935184 |
| 1581.479969 | 154.196966 | 3.48001E-06 | 0.005503567 |
| 1581.519969 | 159.707389 | 3.60437E-06 | 0.005700388 |

|             |            |             |             |
|-------------|------------|-------------|-------------|
| 1581.559969 | 154.954533 | 3.49711E-06 | 0.005530886 |
| 1581.599969 | 155.161299 | 3.50177E-06 | 0.005538406 |
| 1581.639969 | 166.222338 | 3.75141E-06 | 0.005933375 |
| 1581.679969 | 171.430082 | 3.86894E-06 | 0.006119422 |
| 1581.719969 | 159.673885 | 3.60362E-06 | 0.005699913 |
| 1581.759969 | 149.625367 | 3.37684E-06 | 0.005341344 |
| 1581.799969 | 147.951316 | 3.33906E-06 | 0.005281717 |
| 1581.839969 | 149.941135 | 3.38396E-06 | 0.005352887 |
| 1581.879969 | 140.345386 | 3.1674E-06  | 0.005010446 |
| 1581.919969 | 153.038933 | 3.45388E-06 | 0.005463755 |
| 1581.959969 | 158.767093 | 3.58315E-06 | 0.005668403 |
| 1581.999969 | 153.104895 | 3.45536E-06 | 0.005466386 |
| 1582.039969 | 153.396771 | 3.46195E-06 | 0.005476946 |
| 1582.079969 | 162.920131 | 3.67688E-06 | 0.005817119 |
| 1582.119969 | 169.937396 | 3.83525E-06 | 0.006067826 |
| 1582.159969 | 160.666097 | 3.62601E-06 | 0.005736928 |
| 1582.199969 | 151.350976 | 3.41578E-06 | 0.005404448 |
| 1582.239969 | 145.69719  | 3.28818E-06 | 0.005202694 |
| 1582.279969 | 173.466185 | 3.91489E-06 | 0.006194452 |
| 1582.319969 | 191.065868 | 4.31209E-06 | 0.006823107 |
| 1582.359969 | 174.365591 | 3.93519E-06 | 0.006226885 |
| 1582.399969 | 159.475616 | 3.59914E-06 | 0.005695283 |
| 1582.439969 | 149.422629 | 3.37226E-06 | 0.0053364   |
| 1582.479969 | 130.604984 | 2.94757E-06 | 0.004664475 |
| 1582.519969 | 125.818718 | 2.83955E-06 | 0.00449365  |
| 1582.559969 | 135.838554 | 3.06569E-06 | 0.004851633 |
| 1582.599969 | 141.80206  | 3.20027E-06 | 0.005064755 |
| 1582.639969 | 153.646194 | 3.46758E-06 | 0.005487932 |
| 1582.679969 | 169.831061 | 3.83285E-06 | 0.006066176 |
| 1582.719969 | 167.140442 | 3.77213E-06 | 0.005970221 |
| 1582.759969 | 142.356974 | 3.2128E-06  | 0.005085089 |
| 1582.799969 | 137.88043  | 3.11177E-06 | 0.004925308 |
| 1582.839969 | 148.215802 | 3.34502E-06 | 0.005294638 |
| 1582.879969 | 153.162478 | 3.45666E-06 | 0.005471484 |
| 1582.919969 | 159.156397 | 3.59194E-06 | 0.005685751 |
| 1582.959969 | 162.400772 | 3.66516E-06 | 0.0058018   |
| 1582.999969 | 147.934969 | 3.33869E-06 | 0.00528514  |
| 1583.039969 | 137.392036 | 3.10075E-06 | 0.004908606 |
| 1583.079969 | 140.013358 | 3.15991E-06 | 0.005002385 |
| 1583.119969 | 153.47698  | 3.46376E-06 | 0.00548355  |
| 1583.159969 | 174.023622 | 3.92747E-06 | 0.006217814 |
| 1583.199969 | 185.215766 | 4.18006E-06 | 0.006617874 |
| 1583.239969 | 194.961527 | 4.40001E-06 | 0.006966272 |
| 1583.279969 | 184.625797 | 4.16675E-06 | 0.006597127 |
| 1583.319969 | 183.24653  | 4.13562E-06 | 0.006548008 |
| 1583.359969 | 194.966641 | 4.40013E-06 | 0.006966983 |

|             |            |             |             |
|-------------|------------|-------------|-------------|
| 1583.399969 | 193.712062 | 4.37181E-06 | 0.006922326 |
| 1583.439969 | 171.335352 | 3.8668E-06  | 0.006122846 |
| 1583.479969 | 141.414255 | 3.19152E-06 | 0.005053712 |
| 1583.519969 | 131.471029 | 2.96712E-06 | 0.004698491 |
| 1583.559969 | 149.534092 | 3.37478E-06 | 0.00534416  |
| 1583.599969 | 146.403024 | 3.30411E-06 | 0.005232392 |
| 1583.639969 | 136.960061 | 3.091E-06   | 0.004895028 |
| 1583.679969 | 138.880062 | 3.13433E-06 | 0.004963775 |
| 1583.719969 | 125.328731 | 2.82849E-06 | 0.004479544 |
| 1583.759969 | 130.33686  | 2.94152E-06 | 0.004658664 |
| 1583.799969 | 140.963946 | 3.18136E-06 | 0.005038638 |
| 1583.839969 | 160.215626 | 3.61584E-06 | 0.005726917 |
| 1583.879969 | 156.287362 | 3.52719E-06 | 0.005586643 |
| 1583.919969 | 141.074079 | 3.18385E-06 | 0.005042956 |
| 1583.959969 | 131.795838 | 2.97445E-06 | 0.004711407 |
| 1583.999969 | 137.559787 | 3.10453E-06 | 0.00491758  |
| 1584.039969 | 150.935563 | 3.40641E-06 | 0.005395882 |
| 1584.079969 | 153.161914 | 3.45665E-06 | 0.005475612 |
| 1584.119969 | 146.631856 | 3.30928E-06 | 0.005242291 |
| 1584.159969 | 140.659058 | 3.17448E-06 | 0.005028883 |
| 1584.199969 | 154.6618   | 3.4905E-06  | 0.005529652 |
| 1584.239969 | 173.165195 | 3.9081E-06  | 0.006191364 |
| 1584.279969 | 188.548379 | 4.25527E-06 | 0.006741546 |
| 1584.319969 | 168.002081 | 3.79157E-06 | 0.006007065 |
| 1584.359969 | 143.89265  | 3.24746E-06 | 0.00514514  |
| 1584.399969 | 132.265161 | 2.98504E-06 | 0.004729498 |
| 1584.439969 | 126.668014 | 2.85872E-06 | 0.004529471 |
| 1584.479969 | 140.828632 | 3.17831E-06 | 0.005035962 |
| 1584.519969 | 139.740459 | 3.15375E-06 | 0.004997176 |
| 1584.559969 | 134.229796 | 3.02938E-06 | 0.004800234 |
| 1584.599969 | 128.780341 | 2.90639E-06 | 0.00460547  |
| 1584.639969 | 136.757156 | 3.08642E-06 | 0.004890862 |
| 1584.679969 | 146.418494 | 3.30446E-06 | 0.005236514 |
| 1584.719969 | 140.399822 | 3.16863E-06 | 0.005021389 |
| 1584.759969 | 135.90646  | 3.06722E-06 | 0.004860807 |
| 1584.799969 | 149.584225 | 3.37591E-06 | 0.005350138 |
| 1584.839969 | 148.047036 | 3.34122E-06 | 0.005295292 |
| 1584.879969 | 157.715146 | 3.55941E-06 | 0.005641239 |
| 1584.919969 | 154.580632 | 3.48867E-06 | 0.005529262 |
| 1584.959969 | 148.736992 | 3.35679E-06 | 0.005320373 |
| 1584.999969 | 151.268811 | 3.41393E-06 | 0.005411073 |
| 1585.039969 | 150.179304 | 3.38934E-06 | 0.005372236 |
| 1585.079969 | 164.010134 | 3.70148E-06 | 0.005867142 |
| 1585.119969 | 165.300354 | 3.7306E-06  | 0.005913447 |
| 1585.159969 | 145.788242 | 3.29024E-06 | 0.005215553 |
| 1585.199969 | 144.020834 | 3.25035E-06 | 0.005152454 |

|             |            |             |             |
|-------------|------------|-------------|-------------|
| 1585.239969 | 162.825319 | 3.67474E-06 | 0.005825346 |
| 1585.279969 | 195.993728 | 4.42331E-06 | 0.007012178 |
| 1585.319969 | 220.89214  | 4.98523E-06 | 0.007903181 |
| 1585.359969 | 224.677068 | 5.07065E-06 | 0.008038803 |
| 1585.399969 | 199.428413 | 4.50082E-06 | 0.007135602 |
| 1585.439969 | 176.039509 | 3.97297E-06 | 0.0062989   |
| 1585.479969 | 165.609537 | 3.73758E-06 | 0.005925853 |
| 1585.519969 | 136.136116 | 3.0724E-06  | 0.004871356 |
| 1585.559969 | 120.715833 | 2.72439E-06 | 0.004319681 |
| 1585.599969 | 130.360463 | 2.94205E-06 | 0.004664921 |
| 1585.639969 | 144.29804  | 3.25661E-06 | 0.005163804 |
| 1585.679969 | 151.275665 | 3.41408E-06 | 0.00541364  |
| 1585.719969 | 146.181262 | 3.29911E-06 | 0.005231461 |
| 1585.759969 | 133.915037 | 3.02228E-06 | 0.004792604 |
| 1585.799969 | 132.115659 | 2.98167E-06 | 0.004728326 |
| 1585.839969 | 138.322506 | 3.12175E-06 | 0.00495059  |
| 1585.879969 | 146.307327 | 3.30195E-06 | 0.0052365   |
| 1585.919969 | 152.122161 | 3.43319E-06 | 0.005444757 |
| 1585.959969 | 157.108914 | 3.54573E-06 | 0.005623385 |
| 1585.999969 | 160.122651 | 3.61375E-06 | 0.0057314   |
| 1586.039969 | 164.661655 | 3.71618E-06 | 0.005894017 |
| 1586.079969 | 166.602048 | 3.75998E-06 | 0.005963623 |
| 1586.119969 | 150.890169 | 3.40538E-06 | 0.005401343 |
| 1586.159969 | 155.634256 | 3.51245E-06 | 0.005571305 |
| 1586.199969 | 175.457219 | 3.95983E-06 | 0.006281074 |
| 1586.239969 | 179.089865 | 4.04181E-06 | 0.006411279 |
| 1586.279969 | 170.085568 | 3.83859E-06 | 0.006089085 |
| 1586.319969 | 170.281936 | 3.84303E-06 | 0.006096269 |
| 1586.359969 | 185.820215 | 4.1937E-06  | 0.006652723 |
| 1586.399969 | 176.902654 | 3.99245E-06 | 0.006333617 |
| 1586.439969 | 175.834201 | 3.96833E-06 | 0.006295522 |
| 1586.479969 | 172.222607 | 3.88682E-06 | 0.006166369 |
| 1586.519969 | 154.051373 | 3.47672E-06 | 0.005515894 |
| 1586.559969 | 133.806869 | 3.01983E-06 | 0.004791149 |
| 1586.599969 | 121.490506 | 2.74187E-06 | 0.004350253 |
| 1586.639969 | 127.279106 | 2.87251E-06 | 0.004557643 |
| 1586.679969 | 128.494352 | 2.89994E-06 | 0.004601274 |
| 1586.719969 | 141.42423  | 3.19175E-06 | 0.00506441  |
| 1586.759969 | 151.061591 | 3.40925E-06 | 0.005409661 |
| 1586.799969 | 164.413275 | 3.71058E-06 | 0.005887946 |
| 1586.839969 | 169.084667 | 3.81601E-06 | 0.00605539  |
| 1586.879969 | 158.519568 | 3.57757E-06 | 0.005677168 |
| 1586.919969 | 146.389531 | 3.30381E-06 | 0.005242879 |
| 1586.959969 | 144.400875 | 3.25893E-06 | 0.005171786 |
| 1586.999969 | 150.303445 | 3.39214E-06 | 0.005383325 |
| 1587.039969 | 149.585148 | 3.37593E-06 | 0.005357733 |

|             |            |             |             |
|-------------|------------|-------------|-------------|
| 1587.079969 | 128.681707 | 2.90417E-06 | 0.004609145 |
| 1587.119969 | 128.622145 | 2.90282E-06 | 0.004607128 |
| 1587.159969 | 150.903895 | 3.40569E-06 | 0.005405376 |
| 1587.199969 | 154.921007 | 3.49635E-06 | 0.005549409 |
| 1587.239969 | 138.695585 | 3.13017E-06 | 0.004968325 |
| 1587.279969 | 155.503329 | 3.50949E-06 | 0.005570549 |
| 1587.319969 | 192.416536 | 4.34257E-06 | 0.006893053 |
| 1587.359969 | 169.411126 | 3.82337E-06 | 0.006069069 |
| 1587.399969 | 133.875847 | 3.02139E-06 | 0.004796157 |
| 1587.439969 | 126.035405 | 2.84444E-06 | 0.004515383 |
| 1587.479969 | 144.069149 | 3.25144E-06 | 0.005161596 |
| 1587.519969 | 167.256324 | 3.77474E-06 | 0.005992479 |
| 1587.559969 | 161.714889 | 3.64968E-06 | 0.005794086 |
| 1587.599969 | 147.413801 | 3.32692E-06 | 0.005281825 |
| 1587.639969 | 140.637006 | 3.17398E-06 | 0.00503914  |
| 1587.679969 | 141.283938 | 3.18858E-06 | 0.005062447 |
| 1587.719969 | 138.479741 | 3.12529E-06 | 0.004962093 |
| 1587.759969 | 141.290798 | 3.18874E-06 | 0.005062948 |
| 1587.799969 | 153.038947 | 3.45388E-06 | 0.005484064 |
| 1587.839969 | 155.595696 | 3.51158E-06 | 0.005575824 |
| 1587.879969 | 156.264272 | 3.52667E-06 | 0.005599924 |
| 1587.919969 | 166.766539 | 3.76369E-06 | 0.005976436 |
| 1587.959969 | 150.893313 | 3.40545E-06 | 0.005407721 |
| 1587.999969 | 163.318762 | 3.68588E-06 | 0.005853173 |
| 1588.039969 | 180.054126 | 4.06357E-06 | 0.006453113 |
| 1588.079969 | 185.400743 | 4.18424E-06 | 0.006644902 |
| 1588.119969 | 178.283286 | 4.02361E-06 | 0.006389968 |
| 1588.159969 | 156.425571 | 3.53031E-06 | 0.005606693 |
| 1588.199969 | 163.177838 | 3.6827E-06  | 0.005848858 |
| 1588.239969 | 164.92146  | 3.72205E-06 | 0.005911505 |
| 1588.279969 | 156.893308 | 3.54086E-06 | 0.005623882 |
| 1588.319969 | 154.423706 | 3.48513E-06 | 0.005535498 |
| 1588.359969 | 158.259101 | 3.57169E-06 | 0.005673125 |
| 1588.399969 | 164.543609 | 3.71352E-06 | 0.005898555 |
| 1588.439969 | 179.986071 | 4.06203E-06 | 0.006452299 |
| 1588.479969 | 172.797085 | 3.89979E-06 | 0.006194738 |
| 1588.519969 | 144.536919 | 3.262E-06   | 0.005181747 |
| 1588.559969 | 143.653562 | 3.24206E-06 | 0.005150208 |
| 1588.599969 | 166.550839 | 3.75882E-06 | 0.005971262 |
| 1588.639969 | 174.537525 | 3.93907E-06 | 0.006257762 |
| 1588.679969 | 155.06145  | 3.49952E-06 | 0.005559619 |
| 1588.719969 | 126.560093 | 2.85629E-06 | 0.004537837 |
| 1588.759969 | 131.785326 | 2.97421E-06 | 0.004725308 |
| 1588.799969 | 150.829452 | 3.40401E-06 | 0.005408292 |
| 1588.839969 | 166.718021 | 3.76259E-06 | 0.005978159 |
| 1588.879969 | 149.799219 | 3.38076E-06 | 0.005371621 |

|             |            |             |             |
|-------------|------------|-------------|-------------|
| 1588.919969 | 133.603554 | 3.01525E-06 | 0.004790985 |
| 1588.959969 | 124.430622 | 2.80823E-06 | 0.004462158 |
| 1588.999969 | 117.021867 | 2.64102E-06 | 0.004196582 |
| 1589.039969 | 142.463135 | 3.21519E-06 | 0.005109073 |
| 1589.079969 | 168.632655 | 3.8058E-06  | 0.006047727 |
| 1589.119969 | 163.930629 | 3.69969E-06 | 0.005879245 |
| 1589.159969 | 162.951076 | 3.67758E-06 | 0.005844261 |
| 1589.199969 | 167.82348  | 3.78754E-06 | 0.006019162 |
| 1589.239969 | 163.922304 | 3.6995E-06  | 0.00587939  |
| 1589.279969 | 148.735218 | 3.35675E-06 | 0.00533481  |
| 1589.319969 | 160.561043 | 3.62364E-06 | 0.005759122 |
| 1589.359969 | 193.295579 | 4.36241E-06 | 0.006933443 |
| 1589.399969 | 202.413414 | 4.56819E-06 | 0.007260679 |
| 1589.439969 | 183.850648 | 4.14925E-06 | 0.006594989 |
| 1589.479969 | 149.77299  | 3.38017E-06 | 0.005372709 |
| 1589.519969 | 133.597105 | 3.0151E-06  | 0.004792563 |
| 1589.559969 | 123.128751 | 2.77884E-06 | 0.00441714  |
| 1589.599969 | 121.09585  | 2.73296E-06 | 0.004344321 |
| 1589.639969 | 121.771329 | 2.74821E-06 | 0.004368663 |
| 1589.679969 | 124.041487 | 2.79944E-06 | 0.004450219 |
| 1589.719969 | 120.68439  | 2.72368E-06 | 0.004329886 |
| 1589.759969 | 141.399706 | 3.19119E-06 | 0.005073233 |
| 1589.799969 | 180.808894 | 4.0806E-06  | 0.006487346 |
| 1589.839969 | 177.930103 | 4.01563E-06 | 0.006384216 |
| 1589.879969 | 151.194958 | 3.41226E-06 | 0.005425083 |
| 1589.919969 | 135.330328 | 3.05422E-06 | 0.004855961 |
| 1589.959969 | 134.048799 | 3.02529E-06 | 0.004810097 |
| 1589.999969 | 130.554676 | 2.94644E-06 | 0.004684835 |
| 1590.039969 | 134.195013 | 3.02859E-06 | 0.004815586 |
| 1590.079969 | 136.966943 | 3.09115E-06 | 0.004915181 |
| 1590.119969 | 147.635347 | 3.33192E-06 | 0.005298159 |
| 1590.159969 | 163.680058 | 3.69403E-06 | 0.0058741   |
| 1590.199969 | 159.833509 | 3.60722E-06 | 0.005736201 |
| 1590.239969 | 153.574341 | 3.46596E-06 | 0.005511706 |
| 1590.279969 | 156.20229  | 3.52527E-06 | 0.005606163 |
| 1590.319969 | 151.508419 | 3.41933E-06 | 0.005437835 |
| 1590.359969 | 157.17914  | 3.54731E-06 | 0.005641507 |
| 1590.399969 | 177.770354 | 4.01203E-06 | 0.006380731 |
| 1590.439969 | 164.473569 | 3.71194E-06 | 0.005903617 |
| 1590.479969 | 153.356081 | 3.46103E-06 | 0.005504704 |
| 1590.519969 | 151.815601 | 3.42627E-06 | 0.005449546 |
| 1590.559969 | 150.721113 | 3.40157E-06 | 0.005410394 |
| 1590.599969 | 149.32362  | 3.37003E-06 | 0.005360363 |
| 1590.639969 | 153.140922 | 3.45618E-06 | 0.005497534 |
| 1590.679969 | 155.579748 | 3.51122E-06 | 0.005585224 |
| 1590.719969 | 150.227452 | 3.39042E-06 | 0.005393216 |



|             |            |             |             |
|-------------|------------|-------------|-------------|
| 1590.759969 | 169.946232 | 3.83545E-06 | 0.00610128  |
| 1590.799969 | 173.017562 | 3.90477E-06 | 0.006211701 |
| 1590.839969 | 163.833193 | 3.69749E-06 | 0.00588211  |
| 1590.879969 | 178.696007 | 4.03292E-06 | 0.006415892 |
| 1590.919969 | 210.388686 | 4.74818E-06 | 0.007553974 |
| 1590.959969 | 213.291875 | 4.8137E-06  | 0.007658405 |
| 1590.999969 | 187.136985 | 4.22342E-06 | 0.006719463 |
| 1591.039969 | 160.85444  | 3.63026E-06 | 0.00577589  |
| 1591.079969 | 141.103671 | 3.18451E-06 | 0.005066815 |
| 1591.119969 | 143.6392   | 3.24174E-06 | 0.005157992 |
| 1591.159969 | 159.28926  | 3.59494E-06 | 0.005720119 |
| 1591.199969 | 181.402073 | 4.09399E-06 | 0.00651436  |
| 1591.239969 | 193.287215 | 4.36222E-06 | 0.006941344 |
| 1591.279969 | 217.494395 | 4.90855E-06 | 0.00781087  |
| 1591.319969 | 229.140033 | 5.17137E-06 | 0.008229307 |
| 1591.359969 | 217.390595 | 4.9062E-06  | 0.007807535 |
| 1591.399969 | 196.120444 | 4.42617E-06 | 0.007043799 |
| 1591.439969 | 170.250289 | 3.84231E-06 | 0.006114809 |
| 1591.479969 | 148.544403 | 3.35244E-06 | 0.005335342 |
| 1591.519969 | 133.857949 | 3.02099E-06 | 0.004807962 |
| 1591.559969 | 137.988283 | 3.1142E-06  | 0.004956441 |
| 1591.599969 | 147.642931 | 3.3321E-06  | 0.005303363 |
| 1591.639969 | 141.846042 | 3.20127E-06 | 0.005095265 |
| 1591.679969 | 147.573078 | 3.33052E-06 | 0.00530112  |
| 1591.719969 | 172.998958 | 3.90435E-06 | 0.006214625 |
| 1591.759969 | 177.202812 | 3.99922E-06 | 0.006365799 |
| 1591.799969 | 150.469513 | 3.39589E-06 | 0.005405573 |
| 1591.839969 | 116.805741 | 2.63614E-06 | 0.004196318 |
| 1591.879969 | 98.1222    | 2.21448E-06 | 0.003525189 |
| 1591.919969 | 103.508182 | 2.33604E-06 | 0.003718782 |
| 1591.959969 | 137.062298 | 3.09331E-06 | 0.004924418 |
| 1591.999969 | 148.863893 | 3.35965E-06 | 0.005348564 |
| 1592.039969 | 152.860762 | 3.44985E-06 | 0.005492306 |
| 1592.079969 | 153.110487 | 3.45549E-06 | 0.005501417 |
| 1592.119969 | 155.206016 | 3.50278E-06 | 0.005576852 |
| 1592.159969 | 169.997573 | 3.83661E-06 | 0.006108494 |
| 1592.199969 | 180.325396 | 4.06969E-06 | 0.006479765 |
| 1592.239969 | 180.5921   | 4.07571E-06 | 0.006489512 |
| 1592.279969 | 187.587707 | 4.23359E-06 | 0.006741066 |
| 1592.319969 | 166.258114 | 3.75221E-06 | 0.005974725 |
| 1592.359969 | 143.728995 | 3.24376E-06 | 0.005165239 |
| 1592.399969 | 141.591842 | 3.19553E-06 | 0.005088563 |
| 1592.439969 | 139.274708 | 3.14324E-06 | 0.005005415 |
| 1592.479969 | 125.638858 | 2.83549E-06 | 0.004515467 |
| 1592.519969 | 110.370442 | 2.49091E-06 | 0.003966819 |
| 1592.559969 | 110.391756 | 2.49139E-06 | 0.003967685 |

|             |            |             |             |
|-------------|------------|-------------|-------------|
| 1592.599969 | 138.508694 | 3.12595E-06 | 0.004978385 |
| 1592.639969 | 145.224195 | 3.27751E-06 | 0.00521989  |
| 1592.679969 | 137.552842 | 3.10438E-06 | 0.004944278 |
| 1592.719969 | 155.518437 | 3.50983E-06 | 0.005590184 |
| 1592.759969 | 173.959228 | 3.92602E-06 | 0.006253203 |
| 1592.799969 | 154.285306 | 3.482E-06   | 0.005546137 |
| 1592.839969 | 144.345674 | 3.25768E-06 | 0.005188964 |
| 1592.879969 | 145.899041 | 3.29274E-06 | 0.005244937 |
| 1592.919969 | 149.465314 | 3.37322E-06 | 0.005373276 |
| 1592.959969 | 150.479344 | 3.39611E-06 | 0.005409866 |
| 1592.999969 | 151.081975 | 3.40971E-06 | 0.005431668 |
| 1593.039969 | 157.695228 | 3.55896E-06 | 0.005669568 |
| 1593.079969 | 176.592531 | 3.98545E-06 | 0.006349137 |
| 1593.119969 | 183.27343  | 4.13623E-06 | 0.006589504 |
| 1593.159969 | 186.341758 | 4.20547E-06 | 0.006699993 |
| 1593.199969 | 185.405646 | 4.18435E-06 | 0.006666502 |
| 1593.239969 | 177.751542 | 4.0116E-06  | 0.006391449 |
| 1593.279969 | 159.529794 | 3.60037E-06 | 0.00573639  |
| 1593.319969 | 148.95179  | 3.36163E-06 | 0.005356159 |
| 1593.359969 | 156.279133 | 3.527E-06   | 0.005619784 |
| 1593.399969 | 160.856126 | 3.6303E-06  | 0.005784518 |
| 1593.439969 | 165.23418  | 3.72911E-06 | 0.005942105 |
| 1593.479969 | 146.3961   | 3.30396E-06 | 0.005264788 |
| 1593.519969 | 128.963366 | 2.91052E-06 | 0.004637977 |
| 1593.559969 | 117.202722 | 2.6451E-06  | 0.004215129 |
| 1593.599969 | 118.94474  | 2.68442E-06 | 0.004277887 |
| 1593.639969 | 122.972997 | 2.77533E-06 | 0.004422876 |
| 1593.679969 | 123.650981 | 2.79063E-06 | 0.004447372 |
| 1593.719969 | 120.040017 | 2.70914E-06 | 0.004317604 |
| 1593.759969 | 125.727924 | 2.8375E-06  | 0.0045223   |
| 1593.799969 | 143.445411 | 3.23736E-06 | 0.005159709 |
| 1593.839969 | 154.082232 | 3.47742E-06 | 0.005542453 |
| 1593.879969 | 150.453278 | 3.39552E-06 | 0.005412053 |
| 1593.919969 | 145.573004 | 3.28538E-06 | 0.005236633 |
| 1593.959969 | 136.655822 | 3.08413E-06 | 0.004915982 |
| 1593.999969 | 128.469645 | 2.89938E-06 | 0.004621613 |
| 1594.039969 | 126.576905 | 2.85666E-06 | 0.004553637 |
| 1594.079969 | 152.309545 | 3.43741E-06 | 0.005479513 |
| 1594.119969 | 168.504912 | 3.80292E-06 | 0.006062313 |
| 1594.159969 | 162.569036 | 3.66896E-06 | 0.005848904 |
| 1594.199969 | 165.600811 | 3.73738E-06 | 0.005958131 |
| 1594.239969 | 158.616934 | 3.57976E-06 | 0.005707002 |
| 1594.279969 | 167.627749 | 3.78312E-06 | 0.00603136  |
| 1594.319969 | 179.727296 | 4.05619E-06 | 0.006466872 |
| 1594.359969 | 181.55162  | 4.09737E-06 | 0.006532678 |
| 1594.399969 | 189.384499 | 4.27414E-06 | 0.006814696 |

|             |            |             |             |
|-------------|------------|-------------|-------------|
| 1594.439969 | 187.030505 | 4.22102E-06 | 0.00673016  |
| 1594.479969 | 163.127877 | 3.68157E-06 | 0.005870188 |
| 1594.519969 | 151.241697 | 3.41331E-06 | 0.005442598 |
| 1594.559969 | 138.208346 | 3.11917E-06 | 0.004973703 |
| 1594.599969 | 127.637658 | 2.8806E-06  | 0.004593411 |
| 1594.639969 | 113.983926 | 2.57246E-06 | 0.004102145 |
| 1594.679969 | 118.491016 | 2.67418E-06 | 0.004264457 |
| 1594.719969 | 132.903387 | 2.99944E-06 | 0.004783274 |
| 1594.759969 | 137.581438 | 3.10502E-06 | 0.004951764 |
| 1594.799969 | 132.677548 | 2.99435E-06 | 0.004775385 |
| 1594.839969 | 134.117575 | 3.02685E-06 | 0.004827336 |
| 1594.879969 | 135.646764 | 3.06136E-06 | 0.004882499 |
| 1594.919969 | 127.963533 | 2.88796E-06 | 0.004606063 |
| 1594.959969 | 117.95416  | 2.66206E-06 | 0.004245881 |
| 1594.999969 | 125.378171 | 2.82961E-06 | 0.004513229 |
| 1595.039969 | 139.749411 | 3.15395E-06 | 0.005030676 |
| 1595.079969 | 158.897783 | 3.5861E-06  | 0.005720119 |
| 1595.119969 | 170.898877 | 3.85695E-06 | 0.006152297 |
| 1595.159969 | 172.694875 | 3.89748E-06 | 0.006217109 |
| 1595.199969 | 173.200116 | 3.90889E-06 | 0.006235454 |
| 1595.239969 | 189.414395 | 4.27482E-06 | 0.006819362 |
| 1595.279969 | 185.619141 | 4.18917E-06 | 0.006682892 |
| 1595.319969 | 176.046481 | 3.97312E-06 | 0.006338404 |
| 1595.359969 | 155.455517 | 3.50841E-06 | 0.005597184 |
| 1595.399969 | 139.154884 | 3.14053E-06 | 0.005010405 |
| 1595.439969 | 137.761664 | 3.10909E-06 | 0.004960365 |
| 1595.479969 | 133.775904 | 3.01914E-06 | 0.004816971 |
| 1595.519969 | 131.433835 | 2.96628E-06 | 0.004732757 |
| 1595.559969 | 115.43454  | 2.6052E-06  | 0.004156748 |
| 1595.599969 | 104.984461 | 2.36935E-06 | 0.00378054  |
| 1595.639969 | 120.400411 | 2.71727E-06 | 0.004335784 |
| 1595.679969 | 126.772504 | 2.86108E-06 | 0.004565366 |
| 1595.719969 | 138.639511 | 3.1289E-06  | 0.004992849 |
| 1595.759969 | 138.052674 | 3.11566E-06 | 0.00497184  |
| 1595.799969 | 134.988823 | 3.04651E-06 | 0.00486162  |
| 1595.839969 | 141.4666   | 3.1927E-06  | 0.005095045 |
| 1595.879969 | 141.244097 | 3.18768E-06 | 0.005087159 |
| 1595.919969 | 125.788872 | 2.83888E-06 | 0.004530625 |
| 1595.959969 | 118.408186 | 2.67231E-06 | 0.004264896 |
| 1595.999969 | 138.231678 | 3.1197E-06  | 0.004979035 |
| 1596.039969 | 170.960885 | 3.85835E-06 | 0.006158079 |
| 1596.079969 | 179.871679 | 4.05945E-06 | 0.006479212 |
| 1596.119969 | 163.827651 | 3.69736E-06 | 0.005901433 |
| 1596.159969 | 145.226483 | 3.27756E-06 | 0.005231509 |
| 1596.199969 | 153.6671   | 3.46805E-06 | 0.005535705 |
| 1596.239969 | 157.311259 | 3.5503E-06  | 0.005667124 |

|             |            |             |             |
|-------------|------------|-------------|-------------|
| 1596.279969 | 170.221375 | 3.84166E-06 | 0.006132364 |
| 1596.319969 | 175.899778 | 3.96981E-06 | 0.006337092 |
| 1596.359969 | 164.838533 | 3.72018E-06 | 0.00593874  |
| 1596.399969 | 174.094214 | 3.92906E-06 | 0.006272358 |
| 1596.439969 | 195.353162 | 4.40885E-06 | 0.007038462 |
| 1596.479969 | 174.547332 | 3.93929E-06 | 0.006288998 |
| 1596.519969 | 125.607384 | 2.83478E-06 | 0.004525789 |
| 1596.559969 | 119.933154 | 2.70672E-06 | 0.004321448 |
| 1596.599969 | 135.712395 | 3.06284E-06 | 0.00489013  |
| 1596.639969 | 151.907703 | 3.42835E-06 | 0.005473833 |
| 1596.679969 | 158.783802 | 3.58353E-06 | 0.005721749 |
| 1596.719969 | 130.602394 | 2.94751E-06 | 0.004706355 |
| 1596.759969 | 126.621681 | 2.85767E-06 | 0.004563021 |
| 1596.799969 | 153.908213 | 3.47349E-06 | 0.005546475 |
| 1596.839969 | 180.553154 | 4.07483E-06 | 0.006506857 |
| 1596.879969 | 175.010081 | 3.94973E-06 | 0.006307251 |
| 1596.919969 | 157.556932 | 3.55584E-06 | 0.005678393 |
| 1596.959969 | 155.100601 | 3.5004E-06  | 0.005590006 |
| 1596.999969 | 146.558463 | 3.30762E-06 | 0.00528227  |
| 1597.039969 | 142.712534 | 3.22082E-06 | 0.005143783 |
| 1597.079969 | 149.020846 | 3.36319E-06 | 0.005371288 |
| 1597.119969 | 159.784162 | 3.60611E-06 | 0.005759384 |
| 1597.159969 | 166.121835 | 3.74914E-06 | 0.005987974 |
| 1597.199969 | 178.642697 | 4.03172E-06 | 0.006439458 |
| 1597.239969 | 170.517721 | 3.84835E-06 | 0.006146734 |
| 1597.279969 | 161.004445 | 3.63365E-06 | 0.00580395  |
| 1597.319969 | 180.212663 | 4.06715E-06 | 0.006496538 |
| 1597.359969 | 193.72912  | 4.3722E-06  | 0.006983971 |
| 1597.399969 | 175.114024 | 3.95208E-06 | 0.006313052 |
| 1597.439969 | 161.930602 | 3.65455E-06 | 0.005837921 |
| 1597.479969 | 150.566047 | 3.39807E-06 | 0.005428342 |
| 1597.519969 | 135.038002 | 3.04762E-06 | 0.004868633 |
| 1597.559969 | 126.63266  | 2.85792E-06 | 0.004565703 |
| 1597.599969 | 123.259608 | 2.7818E-06  | 0.0044442   |
| 1597.639969 | 120.306495 | 2.71515E-06 | 0.004337832 |
| 1597.679969 | 117.084668 | 2.64244E-06 | 0.00422177  |
| 1597.719969 | 120.33429  | 2.71578E-06 | 0.004339052 |
| 1597.759969 | 134.465795 | 3.03471E-06 | 0.004848731 |
| 1597.799969 | 136.2844   | 3.07575E-06 | 0.004914432 |
| 1597.839969 | 135.173692 | 3.05068E-06 | 0.004874502 |
| 1597.879969 | 129.851709 | 2.93057E-06 | 0.004682703 |
| 1597.919969 | 125.626106 | 2.83521E-06 | 0.004530433 |
| 1597.959969 | 139.260814 | 3.14292E-06 | 0.005022264 |
| 1597.999969 | 159.148344 | 3.59176E-06 | 0.005739627 |
| 1598.039969 | 161.077396 | 3.63529E-06 | 0.005809343 |
| 1598.079969 | 148.375388 | 3.34863E-06 | 0.005351372 |

|             |            |             |             |
|-------------|------------|-------------|-------------|
| 1598.119969 | 157.284999 | 3.5497E-06  | 0.005672852 |
| 1598.159969 | 163.909372 | 3.69921E-06 | 0.005911923 |
| 1598.199969 | 162.658906 | 3.67098E-06 | 0.005866968 |
| 1598.239969 | 161.470352 | 3.64416E-06 | 0.005824244 |
| 1598.279969 | 166.105301 | 3.74877E-06 | 0.005991576 |
| 1598.319969 | 169.346239 | 3.82191E-06 | 0.006108633 |
| 1598.359969 | 167.606979 | 3.78266E-06 | 0.006046046 |
| 1598.399969 | 155.855634 | 3.51744E-06 | 0.005622283 |
| 1598.439969 | 128.447783 | 2.89889E-06 | 0.004633698 |
| 1598.479969 | 119.394672 | 2.69457E-06 | 0.004307218 |
| 1598.519969 | 125.694842 | 2.83676E-06 | 0.004534614 |
| 1598.559969 | 126.903674 | 2.86404E-06 | 0.004578338 |
| 1598.599969 | 140.976565 | 3.18164E-06 | 0.005086177 |
| 1598.639969 | 158.921484 | 3.58664E-06 | 0.005733741 |
| 1598.679969 | 148.590469 | 3.35348E-06 | 0.005361141 |
| 1598.719969 | 140.665535 | 3.17463E-06 | 0.005075337 |
| 1598.759969 | 136.119943 | 3.07204E-06 | 0.004911451 |
| 1598.799969 | 138.507302 | 3.12592E-06 | 0.004997716 |
| 1598.839969 | 149.823272 | 3.3813E-06  | 0.005406162 |
| 1598.879969 | 170.471503 | 3.8473E-06  | 0.006151378 |
| 1598.919969 | 178.183266 | 4.02135E-06 | 0.006429814 |
| 1598.959969 | 173.824859 | 3.92298E-06 | 0.006272696 |
| 1598.999969 | 161.792703 | 3.65144E-06 | 0.005838646 |
| 1599.039969 | 134.356797 | 3.03225E-06 | 0.004848682 |
| 1599.079969 | 135.868664 | 3.06637E-06 | 0.004903365 |
| 1599.119969 | 134.614761 | 3.03807E-06 | 0.004858235 |
| 1599.159969 | 133.021294 | 3.00211E-06 | 0.004800847 |
| 1599.199969 | 159.740862 | 3.60513E-06 | 0.005765322 |
| 1599.239969 | 170.286098 | 3.84312E-06 | 0.006146071 |
| 1599.279969 | 169.747244 | 3.83096E-06 | 0.006126776 |
| 1599.319969 | 172.895518 | 3.90201E-06 | 0.006240564 |
| 1599.359969 | 175.265253 | 3.95549E-06 | 0.006326257 |
| 1599.399969 | 172.093481 | 3.88391E-06 | 0.006211926 |
| 1599.439969 | 158.334972 | 3.5734E-06  | 0.005715438 |
| 1599.479969 | 158.22361  | 3.57089E-06 | 0.005711561 |
| 1599.519969 | 151.426046 | 3.41747E-06 | 0.005466319 |
| 1599.559969 | 131.57167  | 2.96939E-06 | 0.004749716 |
| 1599.599969 | 126.089603 | 2.84567E-06 | 0.004551928 |
| 1599.639969 | 117.444473 | 2.65056E-06 | 0.004239939 |
| 1599.679969 | 127.694578 | 2.88189E-06 | 0.0046101   |
| 1599.719969 | 142.832016 | 3.22352E-06 | 0.005156729 |
| 1599.759969 | 136.457007 | 3.07964E-06 | 0.004926692 |
| 1599.799969 | 127.529323 | 2.87816E-06 | 0.004604479 |
| 1599.839969 | 135.769311 | 3.06412E-06 | 0.004902108 |
| 1599.879969 | 160.127066 | 3.61384E-06 | 0.005781718 |
| 1599.919969 | 140.438562 | 3.1695E-06  | 0.005070951 |

|             |            |             |             |
|-------------|------------|-------------|-------------|
| 1599.959969 | 103.824053 | 2.34316E-06 | 0.003748969 |
| 1599.999969 | 99.989115  | 2.25662E-06 | 0.003610584 |
| 1600.039969 | 114.778452 | 2.59039E-06 | 0.004144727 |
| 1600.079969 | 145.781466 | 3.29008E-06 | 0.005264399 |
| 1600.119969 | 181.997941 | 4.10744E-06 | 0.006572397 |
| 1600.159969 | 167.252308 | 3.77465E-06 | 0.006040046 |
| 1600.199969 | 141.202465 | 3.18674E-06 | 0.005099426 |
| 1600.239969 | 148.300611 | 3.34694E-06 | 0.005355904 |
| 1600.279969 | 173.321913 | 3.91163E-06 | 0.00625971  |
| 1600.319969 | 182.515    | 4.11911E-06 | 0.006591893 |
| 1600.359969 | 176.011847 | 3.97234E-06 | 0.006357177 |
| 1600.399969 | 180.515447 | 4.07398E-06 | 0.006520001 |
| 1600.439969 | 182.029338 | 4.10815E-06 | 0.006574845 |
| 1600.479969 | 162.707943 | 3.67209E-06 | 0.005877109 |
| 1600.519969 | 138.115024 | 3.11706E-06 | 0.004988923 |
| 1600.559969 | 130.493463 | 2.94506E-06 | 0.004713738 |
| 1600.599969 | 133.685206 | 3.01709E-06 | 0.004829152 |
| 1600.639969 | 145.33247  | 3.27995E-06 | 0.005250021 |
| 1600.679969 | 141.98223  | 3.20434E-06 | 0.005129125 |
| 1600.719969 | 132.26228  | 2.98498E-06 | 0.00477811  |
| 1600.759969 | 127.383553 | 2.87487E-06 | 0.004601976 |
| 1600.799969 | 128.100698 | 2.89105E-06 | 0.004628    |
| 1600.839969 | 124.250861 | 2.80417E-06 | 0.004489026 |
| 1600.879969 | 107.672895 | 2.43003E-06 | 0.003890182 |
| 1600.919969 | 101.749049 | 2.29633E-06 | 0.003676247 |
| 1600.959969 | 120.340268 | 2.71591E-06 | 0.004348067 |
| 1600.999969 | 127.717284 | 2.8824E-06  | 0.004614724 |
| 1601.039969 | 128.941195 | 2.91002E-06 | 0.004659063 |
| 1601.079969 | 141.457955 | 3.19251E-06 | 0.005111462 |
| 1601.119969 | 146.521069 | 3.30678E-06 | 0.005294546 |
| 1601.159969 | 162.735963 | 3.67272E-06 | 0.005880619 |
| 1601.199969 | 179.746632 | 4.05663E-06 | 0.006495478 |
| 1601.239969 | 174.243706 | 3.93244E-06 | 0.006296776 |
| 1601.279969 | 169.645433 | 3.82866E-06 | 0.006130758 |
| 1601.319969 | 175.471418 | 3.96015E-06 | 0.00634146  |
| 1601.359969 | 180.197245 | 4.0668E-06  | 0.006512412 |
| 1601.399969 | 162.12447  | 3.65892E-06 | 0.0058594   |
| 1601.439969 | 143.645999 | 3.24189E-06 | 0.005191692 |
| 1601.479969 | 134.467064 | 3.03473E-06 | 0.004860066 |
| 1601.519969 | 124.41226  | 2.80781E-06 | 0.004496766 |
| 1601.559969 | 107.22451  | 2.41991E-06 | 0.003875628 |
| 1601.599969 | 104.203852 | 2.35174E-06 | 0.00376654  |
| 1601.639969 | 109.510726 | 2.4715E-06  | 0.00395846  |
| 1601.679969 | 108.751895 | 2.45438E-06 | 0.003931129 |
| 1601.719969 | 122.101057 | 2.75565E-06 | 0.004413781 |
| 1601.759969 | 157.980017 | 3.56539E-06 | 0.005710897 |

|             |            |             |             |
|-------------|------------|-------------|-------------|
| 1601.799969 | 167.941499 | 3.79021E-06 | 0.006071151 |
| 1601.839969 | 141.642818 | 3.19668E-06 | 0.005120572 |
| 1601.879969 | 139.162998 | 3.14072E-06 | 0.005031048 |
| 1601.919969 | 141.73986  | 3.19887E-06 | 0.005124336 |
| 1601.959969 | 135.241732 | 3.05222E-06 | 0.00488953  |
| 1601.999969 | 138.478099 | 3.12526E-06 | 0.005006663 |
| 1602.039969 | 142.88291  | 3.22467E-06 | 0.005166047 |
| 1602.079969 | 153.100969 | 3.45528E-06 | 0.005535628 |
| 1602.119969 | 169.722067 | 3.83039E-06 | 0.006136745 |
| 1602.159969 | 177.327413 | 4.00203E-06 | 0.006411897 |
| 1602.199969 | 173.543912 | 3.91664E-06 | 0.006275247 |
| 1602.239969 | 159.853748 | 3.60768E-06 | 0.005780363 |
| 1602.279969 | 152.235387 | 3.43574E-06 | 0.005505018 |
| 1602.319969 | 154.435345 | 3.48539E-06 | 0.005584711 |
| 1602.359969 | 155.016783 | 3.49851E-06 | 0.005605877 |
| 1602.399969 | 160.195171 | 3.61538E-06 | 0.005793288 |
| 1602.439969 | 148.16801  | 3.34395E-06 | 0.005358472 |
| 1602.479969 | 148.608594 | 3.35389E-06 | 0.00537454  |
| 1602.519969 | 148.211283 | 3.34492E-06 | 0.005360305 |
| 1602.559969 | 146.44687  | 3.3051E-06  | 0.005296624 |
| 1602.599969 | 135.143688 | 3.05E-06    | 0.004887938 |
| 1602.639969 | 126.779258 | 2.86123E-06 | 0.004585524 |
| 1602.679969 | 112.947282 | 2.54906E-06 | 0.004085332 |
| 1602.719969 | 118.599343 | 2.67662E-06 | 0.004289875 |
| 1602.759969 | 132.35766  | 2.98713E-06 | 0.004787649 |
| 1602.799969 | 150.158453 | 3.38887E-06 | 0.005431676 |
| 1602.839969 | 141.69278  | 3.19781E-06 | 0.005125576 |
| 1602.879969 | 124.170472 | 2.80235E-06 | 0.004491838 |
| 1602.919969 | 124.086548 | 2.80046E-06 | 0.004488914 |
| 1602.959969 | 137.318411 | 3.09909E-06 | 0.00496771  |
| 1602.999969 | 138.37207  | 3.12286E-06 | 0.005005952 |
| 1603.039969 | 151.51309  | 3.41944E-06 | 0.005481498 |
| 1603.079969 | 158.071411 | 3.56745E-06 | 0.00571891  |
| 1603.119969 | 153.797358 | 3.47099E-06 | 0.005564417 |
| 1603.159969 | 146.912006 | 3.3156E-06  | 0.005315436 |
| 1603.199969 | 158.71697  | 3.58202E-06 | 0.005742696 |
| 1603.239969 | 176.636044 | 3.98643E-06 | 0.006391203 |
| 1603.279969 | 179.057318 | 4.04107E-06 | 0.006478973 |
| 1603.319969 | 173.970382 | 3.92627E-06 | 0.006295066 |
| 1603.359969 | 171.579469 | 3.87231E-06 | 0.006208706 |
| 1603.399969 | 160.47672  | 3.62174E-06 | 0.005807091 |
| 1603.439969 | 149.283982 | 3.36913E-06 | 0.0054022   |
| 1603.479969 | 146.378852 | 3.30357E-06 | 0.005297203 |
| 1603.519969 | 147.120276 | 3.3203E-06  | 0.005324167 |
| 1603.559969 | 142.397268 | 3.21371E-06 | 0.005153373 |
| 1603.599969 | 151.733532 | 3.42441E-06 | 0.005491391 |

|             |            |             |             |
|-------------|------------|-------------|-------------|
| 1603.639969 | 154.023996 | 3.47611E-06 | 0.005574424 |
| 1603.679969 | 170.39669  | 3.84562E-06 | 0.006167137 |
| 1603.719969 | 172.023917 | 3.88234E-06 | 0.006226187 |
| 1603.759969 | 139.275372 | 3.14325E-06 | 0.00504102  |
| 1603.799969 | 109.098774 | 2.46221E-06 | 0.003948888 |
| 1603.839969 | 100.327722 | 2.26426E-06 | 0.003631506 |
| 1603.879969 | 100.093363 | 2.25897E-06 | 0.003623113 |
| 1603.919969 | 110.368385 | 2.49086E-06 | 0.003995141 |
| 1603.959969 | 129.484628 | 2.92229E-06 | 0.004687232 |
| 1603.999969 | 155.32519  | 3.50547E-06 | 0.005622779 |
| 1604.039969 | 162.174886 | 3.66006E-06 | 0.005870885 |
| 1604.079969 | 171.501857 | 3.87056E-06 | 0.006208685 |
| 1604.119969 | 172.067699 | 3.88333E-06 | 0.006229324 |
| 1604.159969 | 157.21978  | 3.54823E-06 | 0.005691931 |
| 1604.199969 | 154.057949 | 3.47687E-06 | 0.0055776   |
| 1604.239969 | 140.656512 | 3.17442E-06 | 0.005092534 |
| 1604.279969 | 149.381049 | 3.37132E-06 | 0.005408545 |
| 1604.319969 | 168.535394 | 3.80361E-06 | 0.006102206 |
| 1604.359969 | 161.949141 | 3.65497E-06 | 0.005863882 |
| 1604.399969 | 155.67468  | 3.51336E-06 | 0.005636836 |
| 1604.439969 | 130.817657 | 2.95237E-06 | 0.004736904 |
| 1604.479969 | 128.873215 | 2.90849E-06 | 0.004666612 |
| 1604.519969 | 145.099211 | 3.27469E-06 | 0.005254301 |
| 1604.559969 | 152.76959  | 3.4478E-06  | 0.005532197 |
| 1604.599969 | 133.749056 | 3.01853E-06 | 0.004843533 |
| 1604.639969 | 121.444446 | 2.74083E-06 | 0.004398049 |
| 1604.679969 | 109.797221 | 2.47797E-06 | 0.003976349 |
| 1604.719969 | 123.584374 | 2.78913E-06 | 0.004475768 |
| 1604.759969 | 153.729186 | 3.46945E-06 | 0.00556764  |
| 1604.799969 | 159.448902 | 3.59854E-06 | 0.005774936 |
| 1604.839969 | 154.999433 | 3.49812E-06 | 0.005613925 |
| 1604.879969 | 150.894292 | 3.40547E-06 | 0.005465377 |
| 1604.919969 | 129.380535 | 2.91994E-06 | 0.004686268 |
| 1604.959969 | 118.448276 | 2.67321E-06 | 0.004290399 |
| 1604.999969 | 111.100741 | 2.50739E-06 | 0.004024359 |
| 1605.039969 | 106.917923 | 2.41299E-06 | 0.003872943 |
| 1605.079969 | 117.94551  | 2.66187E-06 | 0.004272508 |
| 1605.119969 | 140.431185 | 3.16934E-06 | 0.005087165 |
| 1605.159969 | 152.743571 | 3.44721E-06 | 0.005533323 |
| 1605.199969 | 168.107872 | 3.79396E-06 | 0.006090065 |
| 1605.239969 | 162.209674 | 3.66085E-06 | 0.005876537 |
| 1605.279969 | 146.23342  | 3.30028E-06 | 0.005297881 |
| 1605.319969 | 149.159111 | 3.36631E-06 | 0.00540401  |
| 1605.359969 | 141.036734 | 3.183E-06   | 0.005109865 |
| 1605.399969 | 115.958095 | 2.61701E-06 | 0.004201352 |
| 1605.439969 | 116.200927 | 2.62249E-06 | 0.004210255 |



|             |            |             |             |
|-------------|------------|-------------|-------------|
| 1605.479969 | 134.750972 | 3.04114E-06 | 0.004882492 |
| 1605.519969 | 144.497339 | 3.2611E-06  | 0.005235767 |
| 1605.559969 | 142.956933 | 3.22634E-06 | 0.005180081 |
| 1605.599969 | 159.830307 | 3.60715E-06 | 0.005791636 |
| 1605.639969 | 184.845871 | 4.17171E-06 | 0.00669827  |
| 1605.679969 | 182.42909  | 4.11717E-06 | 0.006610858 |
| 1605.719969 | 162.178412 | 3.66014E-06 | 0.005877161 |
| 1605.759969 | 151.764932 | 3.42512E-06 | 0.005499926 |
| 1605.799969 | 145.424898 | 3.28204E-06 | 0.005270296 |
| 1605.839969 | 156.924714 | 3.54157E-06 | 0.005687198 |
| 1605.879969 | 148.882131 | 3.36006E-06 | 0.005395857 |
| 1605.919969 | 124.383412 | 2.80716E-06 | 0.004508075 |
| 1605.959969 | 119.167086 | 2.68944E-06 | 0.004319125 |
| 1605.999969 | 127.823596 | 2.8848E-06  | 0.00463299  |
| 1606.039969 | 146.643182 | 3.30953E-06 | 0.005315241 |
| 1606.079969 | 151.706868 | 3.42381E-06 | 0.005498917 |
| 1606.119969 | 141.973982 | 3.20416E-06 | 0.005146257 |
| 1606.159969 | 144.187259 | 3.25411E-06 | 0.005226614 |
| 1606.199969 | 153.671023 | 3.46814E-06 | 0.005570528 |
| 1606.239969 | 165.653625 | 3.73857E-06 | 0.006005043 |
| 1606.279969 | 178.26721  | 4.02324E-06 | 0.006462454 |
| 1606.319969 | 173.327178 | 3.91175E-06 | 0.006283527 |
| 1606.359969 | 158.418322 | 3.57528E-06 | 0.005743188 |
| 1606.399969 | 153.799848 | 3.47105E-06 | 0.005575892 |
| 1606.439969 | 159.443245 | 3.59841E-06 | 0.005780633 |
| 1606.479969 | 155.797471 | 3.51613E-06 | 0.005648595 |
| 1606.519969 | 153.06376  | 3.45444E-06 | 0.00554962  |
| 1606.559969 | 150.790346 | 3.40313E-06 | 0.005467329 |
| 1606.599969 | 135.010412 | 3.047E-06   | 0.004895305 |
| 1606.639969 | 135.610582 | 3.06054E-06 | 0.004917189 |
| 1606.679969 | 142.618246 | 3.2187E-06  | 0.005171413 |
| 1606.719969 | 148.337896 | 3.34778E-06 | 0.005378944 |
| 1606.759969 | 151.822227 | 3.42642E-06 | 0.005505428 |
| 1606.799969 | 133.754392 | 3.01865E-06 | 0.004850367 |
| 1606.839969 | 126.098985 | 2.84588E-06 | 0.004572871 |
| 1606.879969 | 160.341078 | 3.61867E-06 | 0.005814776 |
| 1606.919969 | 173.342014 | 3.91209E-06 | 0.006286412 |
| 1606.959969 | 159.320294 | 3.59564E-06 | 0.005778045 |
| 1606.999969 | 156.122816 | 3.52347E-06 | 0.005662223 |
| 1607.039969 | 150.665972 | 3.40032E-06 | 0.005464452 |
| 1607.079969 | 146.928564 | 3.31597E-06 | 0.005329034 |
| 1607.119969 | 146.699382 | 3.3108E-06  | 0.005320854 |
| 1607.159969 | 142.261486 | 3.21064E-06 | 0.005160018 |
| 1607.199969 | 141.425717 | 3.19178E-06 | 0.005129831 |
| 1607.239969 | 155.650978 | 3.51283E-06 | 0.005645954 |
| 1607.279969 | 177.289651 | 4.00118E-06 | 0.006431017 |

|             |            |             |             |
|-------------|------------|-------------|-------------|
| 1607.319969 | 175.727307 | 3.96592E-06 | 0.006374503 |
| 1607.359969 | 168.408292 | 3.80074E-06 | 0.006109158 |
| 1607.399969 | 167.114353 | 3.77154E-06 | 0.00606237  |
| 1607.439969 | 166.086147 | 3.74833E-06 | 0.00602522  |
| 1607.479969 | 157.991615 | 3.56565E-06 | 0.005731712 |
| 1607.519969 | 141.612935 | 3.19601E-06 | 0.005137645 |
| 1607.559969 | 143.875044 | 3.24706E-06 | 0.005219843 |
| 1607.599969 | 135.380595 | 3.05535E-06 | 0.004911783 |
| 1607.639969 | 117.530222 | 2.65249E-06 | 0.004264254 |
| 1607.679969 | 125.354351 | 2.82907E-06 | 0.004548244 |
| 1607.719969 | 133.330148 | 3.00908E-06 | 0.004837751 |
| 1607.759969 | 138.03158  | 3.11518E-06 | 0.005008463 |
| 1607.799969 | 144.607627 | 3.26359E-06 | 0.005247204 |
| 1607.839969 | 145.079591 | 3.27424E-06 | 0.005264461 |
| 1607.879969 | 139.644095 | 3.15157E-06 | 0.005067351 |
| 1607.919969 | 142.470411 | 3.21536E-06 | 0.00517004  |
| 1607.959969 | 144.700566 | 3.26569E-06 | 0.005251099 |
| 1607.999969 | 144.791855 | 3.26775E-06 | 0.005254543 |
| 1608.039969 | 144.913883 | 3.2705E-06  | 0.005259102 |
| 1608.079969 | 146.289828 | 3.30156E-06 | 0.005309169 |
| 1608.119969 | 173.185186 | 3.90855E-06 | 0.006285415 |
| 1608.159969 | 206.862341 | 4.66859E-06 | 0.007507847 |
| 1608.199969 | 201.722384 | 4.55259E-06 | 0.00732148  |
| 1608.239969 | 170.127196 | 3.83953E-06 | 0.006174892 |
| 1608.279969 | 172.64027  | 3.89625E-06 | 0.006266262 |
| 1608.319969 | 174.867732 | 3.94652E-06 | 0.006347269 |
| 1608.359969 | 174.388707 | 3.93571E-06 | 0.006330039 |
| 1608.399969 | 168.527221 | 3.80342E-06 | 0.006117428 |
| 1608.439969 | 137.26881  | 3.09797E-06 | 0.004982892 |
| 1608.479969 | 134.081535 | 3.02603E-06 | 0.004867314 |
| 1608.519969 | 142.123214 | 3.20752E-06 | 0.005159365 |
| 1608.559969 | 136.88887  | 3.08939E-06 | 0.004969471 |
| 1608.599969 | 150.030222 | 3.38597E-06 | 0.005446676 |
| 1608.639969 | 170.849537 | 3.85584E-06 | 0.006202652 |
| 1608.679969 | 156.316415 | 3.52784E-06 | 0.005675172 |
| 1608.719969 | 151.622566 | 3.42191E-06 | 0.005504895 |
| 1608.759969 | 147.129408 | 3.32051E-06 | 0.005341897 |
| 1608.799969 | 165.768435 | 3.74116E-06 | 0.006018782 |
| 1608.839969 | 175.219785 | 3.95447E-06 | 0.006362104 |
| 1608.879969 | 157.837169 | 3.56217E-06 | 0.005731096 |
| 1608.919969 | 143.436725 | 3.23717E-06 | 0.005208343 |
| 1608.959969 | 151.799303 | 3.4259E-06  | 0.005512134 |
| 1608.999969 | 153.715623 | 3.46915E-06 | 0.005581858 |
| 1609.039969 | 129.878993 | 2.93119E-06 | 0.004716399 |
| 1609.079969 | 129.275436 | 2.91757E-06 | 0.004694598 |
| 1609.119969 | 149.392268 | 3.37158E-06 | 0.005425269 |

|             |            |             |             |
|-------------|------------|-------------|-------------|
| 1609.159969 | 147.208371 | 3.32229E-06 | 0.005346093 |
| 1609.199969 | 142.215854 | 3.20961E-06 | 0.00516491  |
| 1609.239969 | 153.126467 | 3.45585E-06 | 0.005561294 |
| 1609.279969 | 173.34182  | 3.91208E-06 | 0.006295638 |
| 1609.319968 | 193.231821 | 4.36097E-06 | 0.007018201 |
| 1609.359968 | 185.594116 | 4.1886E-06  | 0.006740966 |
| 1609.399968 | 162.783422 | 3.6738E-06  | 0.005912606 |
| 1609.439968 | 141.530925 | 3.19416E-06 | 0.005140802 |
| 1609.479968 | 131.599072 | 2.97001E-06 | 0.004780168 |
| 1609.519968 | 136.410713 | 3.0786E-06  | 0.004955068 |
| 1609.559968 | 147.809479 | 3.33585E-06 | 0.005369257 |
| 1609.599968 | 149.033187 | 3.36347E-06 | 0.005413844 |
| 1609.639968 | 152.571966 | 3.44334E-06 | 0.005542532 |
| 1609.679968 | 151.696814 | 3.42359E-06 | 0.005510877 |
| 1609.719968 | 152.585004 | 3.44363E-06 | 0.005543282 |
| 1609.759968 | 145.241891 | 3.27791E-06 | 0.005276644 |
| 1609.799968 | 130.175843 | 2.93789E-06 | 0.004729411 |
| 1609.839968 | 127.302162 | 2.87303E-06 | 0.004625123 |
| 1609.879968 | 136.195457 | 3.07374E-06 | 0.004948355 |
| 1609.919968 | 148.067293 | 3.34167E-06 | 0.005379825 |
| 1609.959968 | 147.129779 | 3.32051E-06 | 0.005345895 |
| 1609.999968 | 127.001174 | 2.86624E-06 | 0.004614646 |
| 1610.039968 | 122.002578 | 2.75343E-06 | 0.00443313  |
| 1610.079968 | 147.20785  | 3.32228E-06 | 0.00534913  |
| 1610.119968 | 158.288133 | 3.57234E-06 | 0.0057519   |
| 1610.159968 | 151.647733 | 3.42248E-06 | 0.005510737 |
| 1610.199968 | 153.309195 | 3.45997E-06 | 0.005571252 |
| 1610.239968 | 156.247745 | 3.52629E-06 | 0.005678179 |
| 1610.279968 | 155.638579 | 3.51255E-06 | 0.005656182 |
| 1610.319968 | 146.741097 | 3.31174E-06 | 0.005332965 |
| 1610.359968 | 132.708149 | 2.99504E-06 | 0.004823089 |
| 1610.399968 | 134.504365 | 3.03558E-06 | 0.004888492 |
| 1610.439968 | 164.838715 | 3.72018E-06 | 0.005991127 |
| 1610.479968 | 191.975794 | 4.33263E-06 | 0.006977608 |
| 1610.519968 | 177.943664 | 4.01594E-06 | 0.006467753 |
| 1610.559968 | 153.694179 | 3.46866E-06 | 0.005586491 |
| 1610.599968 | 142.561909 | 3.21742E-06 | 0.005181983 |
| 1610.639968 | 134.90082  | 3.04452E-06 | 0.004903631 |
| 1610.679968 | 132.650779 | 2.99374E-06 | 0.004821962 |
| 1610.719968 | 141.977744 | 3.20424E-06 | 0.005161133 |
| 1610.759968 | 145.675613 | 3.2877E-06  | 0.005295689 |
| 1610.799968 | 144.720494 | 3.26614E-06 | 0.005261098 |
| 1610.839968 | 149.337839 | 3.37035E-06 | 0.00542909  |
| 1610.879968 | 149.479453 | 3.37354E-06 | 0.005434373 |
| 1610.919968 | 137.4572   | 3.10222E-06 | 0.004997424 |
| 1610.959968 | 136.839146 | 3.08827E-06 | 0.004975078 |

|             |            |             |             |
|-------------|------------|-------------|-------------|
| 1610.999968 | 144.392332 | 3.25873E-06 | 0.00524982  |
| 1611.039968 | 142.582343 | 3.21788E-06 | 0.005184141 |
| 1611.079968 | 131.73087  | 2.97298E-06 | 0.004789712 |
| 1611.119968 | 127.595953 | 2.87966E-06 | 0.004639482 |
| 1611.159968 | 135.126885 | 3.04963E-06 | 0.004913435 |
| 1611.199968 | 134.959832 | 3.04586E-06 | 0.004907482 |
| 1611.239968 | 135.976095 | 3.06879E-06 | 0.004944559 |
| 1611.279968 | 154.418567 | 3.48501E-06 | 0.00561533  |
| 1611.319968 | 155.26895  | 3.5042E-06  | 0.005646394 |
| 1611.359968 | 146.553704 | 3.30751E-06 | 0.005329594 |
| 1611.399968 | 146.76308  | 3.31224E-06 | 0.005337341 |
| 1611.439968 | 137.168434 | 3.0957E-06  | 0.004988536 |
| 1611.479968 | 137.296611 | 3.09859E-06 | 0.004993321 |
| 1611.519968 | 135.351971 | 3.05471E-06 | 0.004922719 |
| 1611.559968 | 126.58323  | 2.85681E-06 | 0.004603916 |
| 1611.599968 | 125.790823 | 2.83892E-06 | 0.004575209 |
| 1611.639968 | 135.235902 | 3.05209E-06 | 0.004918864 |
| 1611.679968 | 147.755495 | 3.33464E-06 | 0.005374366 |
| 1611.719968 | 143.580035 | 3.2404E-06  | 0.00522262  |
| 1611.759968 | 128.642015 | 2.90327E-06 | 0.004679376 |
| 1611.799968 | 135.20506  | 3.05139E-06 | 0.00491823  |
| 1611.839968 | 143.540042 | 3.2395E-06  | 0.005221554 |
| 1611.879968 | 134.476299 | 3.03494E-06 | 0.004891963 |
| 1611.919968 | 123.164266 | 2.77965E-06 | 0.004480567 |
| 1611.959968 | 125.161684 | 2.82472E-06 | 0.004553343 |
| 1611.999968 | 134.416496 | 3.03359E-06 | 0.004890152 |
| 1612.039968 | 128.642741 | 2.90329E-06 | 0.004680215 |
| 1612.079968 | 133.748759 | 3.01852E-06 | 0.004866101 |
| 1612.119968 | 149.71231  | 3.3788E-06  | 0.005447028 |
| 1612.159968 | 162.219878 | 3.66108E-06 | 0.005902241 |
| 1612.199968 | 157.188616 | 3.54753E-06 | 0.005719325 |
| 1612.239968 | 146.125746 | 3.29785E-06 | 0.005316933 |
| 1612.279968 | 139.102192 | 3.13934E-06 | 0.005061499 |
| 1612.319968 | 142.311919 | 3.21178E-06 | 0.00517842  |
| 1612.359968 | 138.544188 | 3.12675E-06 | 0.005041445 |
| 1612.399968 | 128.086459 | 2.89073E-06 | 0.004661018 |
| 1612.439968 | 127.391714 | 2.87505E-06 | 0.004635851 |
| 1612.479968 | 137.653371 | 3.10664E-06 | 0.005009403 |
| 1612.519968 | 138.474348 | 3.12517E-06 | 0.005039404 |
| 1612.559968 | 134.541676 | 3.03642E-06 | 0.004896406 |
| 1612.599968 | 129.968179 | 2.9332E-06  | 0.004730079 |
| 1612.639968 | 139.86805  | 3.15663E-06 | 0.005090503 |
| 1612.679968 | 130.325296 | 2.94126E-06 | 0.004743312 |
| 1612.719968 | 126.318035 | 2.85082E-06 | 0.004597578 |
| 1612.759968 | 122.2477   | 2.75896E-06 | 0.004449541 |
| 1612.799968 | 139.64539  | 3.1516E-06  | 0.005082904 |

|             |            |             |             |
|-------------|------------|-------------|-------------|
| 1612.839968 | 152.725506 | 3.4468E-06  | 0.00555914  |
| 1612.879968 | 148.861696 | 3.3596E-06  | 0.005418633 |
| 1612.919968 | 136.405509 | 3.07848E-06 | 0.004965346 |
| 1612.959968 | 135.841717 | 3.06576E-06 | 0.004944945 |
| 1612.999968 | 140.224255 | 3.16467E-06 | 0.005104606 |
| 1613.039968 | 136.301618 | 3.07614E-06 | 0.004961933 |
| 1613.079968 | 151.781667 | 3.4255E-06  | 0.005525607 |
| 1613.119968 | 162.024427 | 3.65667E-06 | 0.00589864  |
| 1613.159968 | 152.023086 | 3.43095E-06 | 0.00553467  |
| 1613.199968 | 142.004416 | 3.20484E-06 | 0.005170051 |
| 1613.239968 | 139.218398 | 3.14197E-06 | 0.005068744 |
| 1613.279968 | 158.553817 | 3.57834E-06 | 0.005772862 |
| 1613.319968 | 183.612531 | 4.14388E-06 | 0.006685403 |
| 1613.359968 | 181.510523 | 4.09644E-06 | 0.006609032 |
| 1613.399968 | 151.829351 | 3.42658E-06 | 0.005528439 |
| 1613.439968 | 138.347161 | 3.1223E-06  | 0.005037648 |
| 1613.479968 | 147.096849 | 3.31977E-06 | 0.005356384 |
| 1613.519968 | 147.326758 | 3.32496E-06 | 0.005364889 |
| 1613.559968 | 143.909146 | 3.24783E-06 | 0.005240567 |
| 1613.599968 | 158.665464 | 3.58086E-06 | 0.005778073 |
| 1613.639968 | 165.519665 | 3.73555E-06 | 0.00602783  |
| 1613.679968 | 149.000264 | 3.36273E-06 | 0.005426367 |
| 1613.719968 | 134.285597 | 3.03064E-06 | 0.004890602 |
| 1613.759968 | 125.957454 | 2.84268E-06 | 0.00458741  |
| 1613.799968 | 112.805084 | 2.54585E-06 | 0.004108498 |
| 1613.839968 | 108.983573 | 2.45961E-06 | 0.003969413 |
| 1613.879968 | 120.148662 | 2.71159E-06 | 0.004376177 |
| 1613.919968 | 121.50615  | 2.74222E-06 | 0.004425731 |
| 1613.959968 | 120.938799 | 2.72942E-06 | 0.004405175 |
| 1613.999968 | 126.99288  | 2.86605E-06 | 0.004625809 |
| 1614.039968 | 129.09214  | 2.91343E-06 | 0.004702392 |
| 1614.079968 | 142.806668 | 3.22295E-06 | 0.005202095 |
| 1614.119968 | 171.982366 | 3.8814E-06  | 0.006265049 |
| 1614.159968 | 177.698675 | 4.01041E-06 | 0.006473446 |
| 1614.199968 | 178.375083 | 4.02568E-06 | 0.006498248 |
| 1614.239968 | 165.521586 | 3.73559E-06 | 0.006030141 |
| 1614.279968 | 160.762195 | 3.62818E-06 | 0.005856896 |
| 1614.319968 | 183.230129 | 4.13525E-06 | 0.006675615 |
| 1614.359968 | 195.253639 | 4.4066E-06  | 0.007113843 |
| 1614.399968 | 168.011749 | 3.79179E-06 | 0.006121468 |
| 1614.439968 | 144.819343 | 3.26837E-06 | 0.005276589 |
| 1614.479968 | 142.555575 | 3.21728E-06 | 0.005194235 |
| 1614.519968 | 139.255518 | 3.1428E-06  | 0.005074118 |
| 1614.559968 | 131.105871 | 2.95888E-06 | 0.004777284 |
| 1614.599968 | 116.763785 | 2.6352E-06  | 0.004254787 |
| 1614.639968 | 110.965148 | 2.50433E-06 | 0.004043589 |

|             |            |             |             |
|-------------|------------|-------------|-------------|
| 1614.679968 | 116.745323 | 2.63478E-06 | 0.004254325 |
| 1614.719968 | 127.323564 | 2.87352E-06 | 0.004639923 |
| 1614.759968 | 137.461887 | 3.10232E-06 | 0.005009508 |
| 1614.799968 | 128.413936 | 2.89812E-06 | 0.00467989  |
| 1614.839968 | 126.428102 | 2.85331E-06 | 0.004607633 |
| 1614.879968 | 130.031183 | 2.93462E-06 | 0.004739063 |
| 1614.919968 | 142.433226 | 3.21452E-06 | 0.005191192 |
| 1614.959968 | 141.646691 | 3.19677E-06 | 0.005162653 |
| 1614.999968 | 133.273869 | 3.00781E-06 | 0.004857606 |
| 1615.039968 | 139.146269 | 3.14034E-06 | 0.005071771 |
| 1615.079968 | 158.942636 | 3.58711E-06 | 0.005793476 |
| 1615.119968 | 164.217223 | 3.70615E-06 | 0.005985883 |
| 1615.159968 | 140.717634 | 3.1758E-06  | 0.005129427 |
| 1615.199968 | 146.280003 | 3.30134E-06 | 0.005332318 |
| 1615.239968 | 155.493607 | 3.50927E-06 | 0.00566832  |
| 1615.279968 | 137.807977 | 3.11013E-06 | 0.005023737 |
| 1615.319968 | 142.575262 | 3.21773E-06 | 0.005197656 |
| 1615.359968 | 159.900691 | 3.60874E-06 | 0.005829407 |
| 1615.399968 | 154.651793 | 3.49028E-06 | 0.005638191 |
| 1615.439968 | 158.133197 | 3.56885E-06 | 0.005765256 |
| 1615.479968 | 148.341021 | 3.34785E-06 | 0.005408385 |
| 1615.519968 | 137.093581 | 3.09401E-06 | 0.004998437 |
| 1615.559968 | 133.772472 | 3.01906E-06 | 0.00487747  |
| 1615.599968 | 138.862735 | 3.13394E-06 | 0.005063191 |
| 1615.639968 | 156.803383 | 3.53883E-06 | 0.005717482 |
| 1615.679968 | 160.816591 | 3.62941E-06 | 0.005863959 |
| 1615.719968 | 148.500962 | 3.35146E-06 | 0.005415021 |
| 1615.759968 | 140.627233 | 3.17376E-06 | 0.005128036 |
| 1615.799968 | 156.161555 | 3.52435E-06 | 0.005694643 |
| 1615.839968 | 164.917598 | 3.72196E-06 | 0.006014092 |
| 1615.879968 | 158.84563  | 3.58492E-06 | 0.005792808 |
| 1615.919968 | 146.414094 | 3.30436E-06 | 0.005339585 |
| 1615.959968 | 135.319587 | 3.05397E-06 | 0.004935101 |
| 1615.999968 | 136.580229 | 3.08243E-06 | 0.0049812   |
| 1616.039968 | 128.084785 | 2.8907E-06  | 0.004671479 |
| 1616.079968 | 116.374779 | 2.62642E-06 | 0.004244499 |
| 1616.119968 | 117.77448  | 2.65801E-06 | 0.004295657 |
| 1616.159968 | 144.759661 | 3.26702E-06 | 0.005280033 |
| 1616.199968 | 155.665944 | 3.51316E-06 | 0.005677975 |
| 1616.239968 | 156.601844 | 3.53429E-06 | 0.005712253 |
| 1616.279968 | 176.991098 | 3.99444E-06 | 0.006456137 |
| 1616.319968 | 208.831537 | 4.71304E-06 | 0.007617776 |
| 1616.359968 | 210.764921 | 4.75667E-06 | 0.007688492 |
| 1616.399968 | 189.98424  | 4.28768E-06 | 0.006930605 |
| 1616.439968 | 175.206176 | 3.95416E-06 | 0.006391661 |
| 1616.479968 | 147.282803 | 3.32397E-06 | 0.005373127 |

|             |            |             |             |
|-------------|------------|-------------|-------------|
| 1616.519968 | 124.197567 | 2.80297E-06 | 0.004531051 |
| 1616.559968 | 132.333419 | 2.98658E-06 | 0.004827987 |
| 1616.599968 | 152.914233 | 3.45106E-06 | 0.005578986 |
| 1616.639968 | 153.630324 | 3.46722E-06 | 0.00560525  |
| 1616.679968 | 134.420261 | 3.03368E-06 | 0.004904487 |
| 1616.719968 | 137.673777 | 3.10711E-06 | 0.005023319 |
| 1616.759968 | 137.588357 | 3.10518E-06 | 0.005020327 |
| 1616.799968 | 137.437398 | 3.10177E-06 | 0.005014943 |
| 1616.839968 | 141.77599  | 3.19969E-06 | 0.005173381 |
| 1616.879968 | 141.949266 | 3.2036E-06  | 0.005179832 |
| 1616.919968 | 144.82566  | 3.26851E-06 | 0.005284925 |
| 1616.959968 | 138.262171 | 3.12038E-06 | 0.005045537 |
| 1616.999968 | 145.287918 | 3.27895E-06 | 0.005302055 |
| 1617.039968 | 175.707462 | 3.96547E-06 | 0.006412328 |
| 1617.079968 | 176.182526 | 3.97619E-06 | 0.006429824 |
| 1617.119968 | 151.780837 | 3.42548E-06 | 0.005539415 |
| 1617.159968 | 138.049774 | 3.11559E-06 | 0.005038409 |
| 1617.199968 | 159.127342 | 3.59128E-06 | 0.005807822 |
| 1617.239968 | 163.885922 | 3.69868E-06 | 0.005981648 |
| 1617.279968 | 147.091201 | 3.31964E-06 | 0.005368793 |
| 1617.319968 | 133.667506 | 3.01669E-06 | 0.004878952 |
| 1617.359968 | 132.820255 | 2.99757E-06 | 0.004848147 |
| 1617.399968 | 145.063593 | 3.27388E-06 | 0.005295179 |
| 1617.439968 | 147.316136 | 3.32472E-06 | 0.005377535 |
| 1617.479968 | 139.267102 | 3.14306E-06 | 0.005083844 |
| 1617.519968 | 117.869183 | 2.66014E-06 | 0.004302835 |
| 1617.559968 | 113.312558 | 2.55731E-06 | 0.004136597 |
| 1617.599968 | 115.344786 | 2.60317E-06 | 0.00421089  |
| 1617.639968 | 120.445478 | 2.71829E-06 | 0.004397209 |
| 1617.679968 | 136.249136 | 3.07495E-06 | 0.00497429  |
| 1617.719968 | 129.483964 | 2.92227E-06 | 0.004727419 |
| 1617.759968 | 111.234307 | 2.5104E-06  | 0.00406123  |
| 1617.799968 | 103.34388  | 2.33233E-06 | 0.003773239 |
| 1617.839968 | 124.502631 | 2.80985E-06 | 0.004545889 |
| 1617.879968 | 142.26442  | 3.21071E-06 | 0.005194543 |
| 1617.919968 | 142.636786 | 3.21911E-06 | 0.005208268 |
| 1617.959968 | 135.905056 | 3.06719E-06 | 0.004962587 |
| 1617.999968 | 130.458448 | 2.94427E-06 | 0.004763821 |
| 1618.039968 | 123.287661 | 2.78243E-06 | 0.004502084 |
| 1618.079968 | 138.818883 | 3.13295E-06 | 0.005069362 |
| 1618.119968 | 155.836612 | 3.51702E-06 | 0.005690953 |
| 1618.159968 | 154.870878 | 3.49522E-06 | 0.005655825 |
| 1618.199968 | 160.762597 | 3.62819E-06 | 0.005871134 |
| 1618.239968 | 170.267037 | 3.84269E-06 | 0.006218394 |
| 1618.279968 | 176.928606 | 3.99303E-06 | 0.006461844 |
| 1618.319968 | 174.824702 | 3.94555E-06 | 0.006385162 |

|             |            |             |             |
|-------------|------------|-------------|-------------|
| 1618.359968 | 170.576677 | 3.84968E-06 | 0.006230165 |
| 1618.399968 | 147.477164 | 3.32835E-06 | 0.005386608 |
| 1618.439968 | 125.993062 | 2.84349E-06 | 0.004602014 |
| 1618.479968 | 117.609395 | 2.65428E-06 | 0.004295899 |
| 1618.519968 | 118.965176 | 2.68488E-06 | 0.004345529 |
| 1618.559968 | 133.388836 | 3.0104E-06  | 0.004872513 |
| 1618.599968 | 125.245368 | 2.82661E-06 | 0.004575157 |
| 1618.639968 | 121.832327 | 2.74959E-06 | 0.00445059  |
| 1618.679968 | 143.485802 | 3.23827E-06 | 0.00524173  |
| 1618.719968 | 148.048194 | 3.34124E-06 | 0.005408534 |
| 1618.759968 | 138.550516 | 3.12689E-06 | 0.005061688 |
| 1618.799968 | 134.069758 | 3.02577E-06 | 0.004898113 |
| 1618.839968 | 124.585941 | 2.81173E-06 | 0.004551743 |
| 1618.879968 | 132.337586 | 2.98667E-06 | 0.004835068 |
| 1618.919968 | 141.245092 | 3.1877E-06  | 0.005160639 |
| 1618.959968 | 140.787741 | 3.17738E-06 | 0.005144056 |
| 1618.999968 | 135.820439 | 3.06528E-06 | 0.004962685 |
| 1619.039968 | 133.004318 | 3.00172E-06 | 0.004859908 |
| 1619.079968 | 153.89775  | 3.47326E-06 | 0.005623482 |
| 1619.119968 | 169.284449 | 3.82051E-06 | 0.006185871 |
| 1619.159968 | 146.90104  | 3.31535E-06 | 0.005368085 |
| 1619.199968 | 147.54946  | 3.32999E-06 | 0.005391913 |
| 1619.239968 | 157.460657 | 3.55367E-06 | 0.005754241 |
| 1619.279968 | 158.358856 | 3.57394E-06 | 0.005787208 |
| 1619.319968 | 156.445311 | 3.53075E-06 | 0.005717418 |
| 1619.359968 | 136.694017 | 3.08499E-06 | 0.004995715 |
| 1619.399968 | 130.182016 | 2.93803E-06 | 0.00475784  |
| 1619.439968 | 147.757222 | 3.33467E-06 | 0.005400305 |
| 1619.479968 | 164.879061 | 3.72109E-06 | 0.006026232 |
| 1619.519968 | 171.639868 | 3.87367E-06 | 0.00627349  |
| 1619.559968 | 153.670444 | 3.46813E-06 | 0.005616841 |
| 1619.599968 | 138.898234 | 3.13474E-06 | 0.005077024 |
| 1619.639968 | 133.694997 | 3.01731E-06 | 0.004886956 |
| 1619.679968 | 123.846125 | 2.79503E-06 | 0.004527061 |
| 1619.719968 | 140.631067 | 3.17385E-06 | 0.005140744 |
| 1619.759968 | 155.049908 | 3.49926E-06 | 0.005667962 |
| 1619.799968 | 146.6794   | 3.31035E-06 | 0.005362104 |
| 1619.839968 | 140.178527 | 3.16363E-06 | 0.005124581 |
| 1619.879968 | 140.310029 | 3.1666E-06  | 0.005129515 |
| 1619.919968 | 150.343486 | 3.39304E-06 | 0.005496458 |
| 1619.959968 | 144.34951  | 3.25777E-06 | 0.005277453 |
| 1619.999968 | 139.329764 | 3.14448E-06 | 0.005094055 |
| 1620.039968 | 142.291815 | 3.21133E-06 | 0.00520248  |
| 1620.079968 | 139.724577 | 3.15339E-06 | 0.005108742 |
| 1620.119968 | 123.150839 | 2.77934E-06 | 0.004502869 |
| 1620.159968 | 126.570802 | 2.85653E-06 | 0.00462803  |



|             |            |             |             |
|-------------|------------|-------------|-------------|
| 1620.199968 | 139.081986 | 3.13889E-06 | 0.005085624 |
| 1620.239968 | 152.285262 | 3.43687E-06 | 0.005568548 |
| 1620.279968 | 164.624588 | 3.71535E-06 | 0.006019903 |
| 1620.319968 | 182.107338 | 4.10991E-06 | 0.006659368 |
| 1620.359968 | 209.257417 | 4.72265E-06 | 0.00765239  |
| 1620.399968 | 201.959919 | 4.55795E-06 | 0.007385709 |
| 1620.439968 | 179.055692 | 4.04104E-06 | 0.006548259 |
| 1620.479968 | 163.049424 | 3.6798E-06  | 0.00596304  |
| 1620.519968 | 146.424833 | 3.3046E-06  | 0.005355178 |
| 1620.559968 | 134.443237 | 3.0342E-06  | 0.004917098 |
| 1620.599968 | 124.952861 | 2.82001E-06 | 0.004570111 |
| 1620.639968 | 126.687211 | 2.85915E-06 | 0.004633659 |
| 1620.679968 | 129.16777  | 2.91514E-06 | 0.004724504 |
| 1620.719968 | 120.807926 | 2.72647E-06 | 0.004418839 |
| 1620.759968 | 113.870835 | 2.56991E-06 | 0.004165201 |
| 1620.799968 | 123.814404 | 2.79432E-06 | 0.004529032 |
| 1620.839968 | 128.773656 | 2.90624E-06 | 0.004710553 |
| 1620.879968 | 126.882896 | 2.86357E-06 | 0.004641504 |
| 1620.919968 | 127.809346 | 2.88448E-06 | 0.004675509 |
| 1620.959968 | 132.118009 | 2.98172E-06 | 0.004833248 |
| 1620.999968 | 149.498898 | 3.37398E-06 | 0.005469225 |
| 1621.039968 | 158.863117 | 3.58532E-06 | 0.005811946 |
| 1621.079968 | 147.158711 | 3.32117E-06 | 0.005383878 |
| 1621.119968 | 138.214033 | 3.1193E-06  | 0.005056757 |
| 1621.159968 | 140.040849 | 3.16053E-06 | 0.00512372  |
| 1621.199968 | 158.29734  | 3.57255E-06 | 0.005791819 |
| 1621.239968 | 179.182784 | 4.04391E-06 | 0.006556142 |
| 1621.279968 | 195.5758   | 4.41387E-06 | 0.007156125 |
| 1621.319968 | 211.258956 | 4.76782E-06 | 0.007730162 |
| 1621.359968 | 195.264661 | 4.40685E-06 | 0.007145092 |
| 1621.399968 | 178.336913 | 4.02482E-06 | 0.006525836 |
| 1621.439968 | 162.307255 | 3.66305E-06 | 0.005939414 |
| 1621.479968 | 127.745735 | 2.88304E-06 | 0.004674797 |
| 1621.519968 | 119.595787 | 2.69911E-06 | 0.004376661 |
| 1621.559968 | 117.876805 | 2.66032E-06 | 0.004313861 |
| 1621.599968 | 123.018632 | 2.77636E-06 | 0.004502144 |
| 1621.639968 | 149.899631 | 3.38303E-06 | 0.00548605  |
| 1621.679968 | 157.254713 | 3.54902E-06 | 0.005755374 |
| 1621.719968 | 146.900047 | 3.31533E-06 | 0.005376536 |
| 1621.759968 | 137.018618 | 3.09232E-06 | 0.005015    |
| 1621.799968 | 139.597732 | 3.15053E-06 | 0.005109524 |
| 1621.839968 | 139.145972 | 3.14033E-06 | 0.005093114 |
| 1621.879968 | 131.560008 | 2.96913E-06 | 0.004815566 |
| 1621.919968 | 127.391995 | 2.87506E-06 | 0.004663117 |
| 1621.959968 | 153.613195 | 3.46684E-06 | 0.005623069 |
| 1621.999968 | 177.136535 | 3.99772E-06 | 0.00648431  |

|             |            |             |             |
|-------------|------------|-------------|-------------|
| 1622.039968 | 187.090957 | 4.22238E-06 | 0.006848873 |
| 1622.079968 | 188.710417 | 4.25893E-06 | 0.006908327 |
| 1622.119968 | 193.722947 | 4.37206E-06 | 0.007092001 |
| 1622.159968 | 189.122874 | 4.26824E-06 | 0.006923768 |
| 1622.199968 | 168.783941 | 3.80922E-06 | 0.006179314 |
| 1622.239968 | 165.681287 | 3.7392E-06  | 0.006065873 |
| 1622.279968 | 158.137077 | 3.56893E-06 | 0.005789809 |
| 1622.319968 | 149.313427 | 3.3698E-06  | 0.005466887 |
| 1622.359968 | 152.32903  | 3.43785E-06 | 0.005577437 |
| 1622.399968 | 160.152754 | 3.61442E-06 | 0.005864042 |
| 1622.439968 | 171.449973 | 3.86939E-06 | 0.006277848 |
| 1622.479968 | 159.964475 | 3.61018E-06 | 0.005857437 |
| 1622.519968 | 160.537758 | 3.62311E-06 | 0.005878574 |
| 1622.559968 | 147.634847 | 3.33191E-06 | 0.005406228 |
| 1622.599968 | 132.046576 | 2.98011E-06 | 0.004835522 |
| 1622.639968 | 127.870147 | 2.88585E-06 | 0.004682697 |
| 1622.679968 | 140.478688 | 3.17041E-06 | 0.005144558 |
| 1622.719968 | 156.806693 | 3.53891E-06 | 0.005742658 |
| 1622.759968 | 158.240441 | 3.57127E-06 | 0.005795308 |
| 1622.799968 | 157.534775 | 3.55534E-06 | 0.005769606 |
| 1622.839968 | 159.008777 | 3.58861E-06 | 0.005823734 |
| 1622.879968 | 166.70509  | 3.7623E-06  | 0.006105764 |
| 1622.919968 | 158.903686 | 3.58623E-06 | 0.005820172 |
| 1622.959968 | 127.459305 | 2.87658E-06 | 0.004668573 |
| 1622.999968 | 122.564234 | 2.7661E-06  | 0.004489387 |
| 1623.039968 | 142.414865 | 3.21411E-06 | 0.005216621 |
| 1623.079968 | 156.612428 | 3.53452E-06 | 0.005736816 |
| 1623.119968 | 138.723807 | 3.1308E-06  | 0.005081669 |
| 1623.159968 | 131.701834 | 2.97233E-06 | 0.004824562 |
| 1623.199968 | 148.777352 | 3.3577E-06  | 0.005450215 |
| 1623.239968 | 164.741311 | 3.71798E-06 | 0.006035177 |
| 1623.279968 | 175.61125  | 3.9633E-06  | 0.006433548 |
| 1623.319968 | 169.098402 | 3.81632E-06 | 0.006195101 |
| 1623.359968 | 167.825604 | 3.78759E-06 | 0.006148622 |
| 1623.399968 | 174.631294 | 3.94119E-06 | 0.00639812  |
| 1623.439968 | 179.244057 | 4.04529E-06 | 0.006567283 |
| 1623.479968 | 180.560198 | 4.07499E-06 | 0.006615668 |
| 1623.519968 | 163.564319 | 3.69142E-06 | 0.005993092 |
| 1623.559968 | 150.332014 | 3.39278E-06 | 0.005508389 |
| 1623.599968 | 136.510787 | 3.08086E-06 | 0.005002081 |
| 1623.639968 | 136.942157 | 3.09059E-06 | 0.005018012 |
| 1623.679968 | 128.659935 | 2.90368E-06 | 0.00471464  |
| 1623.719968 | 120.497931 | 2.71947E-06 | 0.004415658 |
| 1623.759968 | 136.476705 | 3.08009E-06 | 0.005001325 |
| 1623.799968 | 149.02404  | 3.36327E-06 | 0.00546127  |
| 1623.839968 | 143.947213 | 3.24869E-06 | 0.00527535  |

|             |            |             |             |
|-------------|------------|-------------|-------------|
| 1623.879968 | 140.703204 | 3.17548E-06 | 0.005156591 |
| 1623.919968 | 150.752937 | 3.40228E-06 | 0.005525037 |
| 1623.959968 | 142.506844 | 3.21618E-06 | 0.005222949 |
| 1623.999968 | 124.955554 | 2.82007E-06 | 0.004579798 |
| 1624.039968 | 121.173539 | 2.73472E-06 | 0.004441291 |
| 1624.079968 | 137.802959 | 3.11002E-06 | 0.005050923 |
| 1624.119968 | 142.232206 | 3.20998E-06 | 0.005213397 |
| 1624.159968 | 143.115148 | 3.22991E-06 | 0.00524589  |
| 1624.199968 | 136.019855 | 3.06978E-06 | 0.004985934 |
| 1624.239968 | 134.100873 | 3.02647E-06 | 0.004915713 |
| 1624.279968 | 154.755704 | 3.49262E-06 | 0.005672994 |
| 1624.319968 | 158.754012 | 3.58286E-06 | 0.005819706 |
| 1624.359968 | 148.93361  | 3.36122E-06 | 0.005459838 |
| 1624.399968 | 148.110737 | 3.34265E-06 | 0.005429805 |
| 1624.439968 | 151.782744 | 3.42553E-06 | 0.00556456  |
| 1624.479968 | 149.956468 | 3.38431E-06 | 0.005497742 |
| 1624.519968 | 140.077519 | 3.16135E-06 | 0.005135683 |
| 1624.559968 | 134.755346 | 3.04124E-06 | 0.004940678 |
| 1624.599968 | 131.680781 | 2.97185E-06 | 0.00482807  |
| 1624.639968 | 131.507718 | 2.96795E-06 | 0.004821844 |
| 1624.679968 | 120.768451 | 2.72558E-06 | 0.004428188 |
| 1624.719968 | 115.941882 | 2.61665E-06 | 0.004251318 |
| 1624.759968 | 112.207593 | 2.53237E-06 | 0.004114492 |
| 1624.799968 | 107.123329 | 2.41762E-06 | 0.003928156 |
| 1624.839968 | 125.574781 | 2.83405E-06 | 0.004604874 |
| 1624.879968 | 140.592464 | 3.17298E-06 | 0.005155705 |
| 1624.919968 | 142.038729 | 3.20562E-06 | 0.00520887  |
| 1624.959968 | 144.186422 | 3.25409E-06 | 0.005287761 |
| 1624.999968 | 133.939894 | 3.02284E-06 | 0.00491211  |
| 1625.039968 | 123.039752 | 2.77684E-06 | 0.004512469 |
| 1625.079968 | 139.270385 | 3.14314E-06 | 0.005107852 |
| 1625.119968 | 150.184322 | 3.38945E-06 | 0.005508264 |
| 1625.159968 | 137.149918 | 3.09528E-06 | 0.005030329 |
| 1625.199968 | 142.897075 | 3.22499E-06 | 0.00524125  |
| 1625.239968 | 147.708314 | 3.33357E-06 | 0.005417853 |
| 1625.279968 | 149.674526 | 3.37795E-06 | 0.005490107 |
| 1625.319968 | 159.76126  | 3.60559E-06 | 0.005860236 |
| 1625.359968 | 167.944474 | 3.79027E-06 | 0.006160558 |
| 1625.399968 | 150.224013 | 3.39035E-06 | 0.005510669 |
| 1625.439968 | 129.591734 | 2.9247E-06  | 0.004753932 |
| 1625.479968 | 123.454582 | 2.7862E-06  | 0.004528909 |
| 1625.519968 | 116.489706 | 2.62901E-06 | 0.004273509 |
| 1625.559968 | 120.385747 | 2.71694E-06 | 0.004416547 |
| 1625.599968 | 132.35688  | 2.98711E-06 | 0.004855847 |
| 1625.639968 | 142.038641 | 3.20561E-06 | 0.005211175 |
| 1625.679968 | 142.310911 | 3.21176E-06 | 0.005221292 |

|             |            |             |             |
|-------------|------------|-------------|-------------|
| 1625.719968 | 121.887042 | 2.75082E-06 | 0.004472064 |
| 1625.759968 | 115.046642 | 2.59644E-06 | 0.004221192 |
| 1625.799968 | 104.703446 | 2.36301E-06 | 0.003841783 |
| 1625.839968 | 105.724828 | 2.38606E-06 | 0.003879355 |
| 1625.879968 | 122.435797 | 2.76321E-06 | 0.00449264  |
| 1625.919968 | 130.196465 | 2.93835E-06 | 0.004777527 |
| 1625.959968 | 131.551477 | 2.96893E-06 | 0.004827367 |
| 1625.999968 | 146.911197 | 3.31558E-06 | 0.005391135 |
| 1626.039968 | 145.449337 | 3.28259E-06 | 0.005337621 |
| 1626.079968 | 128.585312 | 2.90199E-06 | 0.00471887  |
| 1626.119968 | 138.594194 | 3.12788E-06 | 0.005086305 |
| 1626.159968 | 138.275551 | 3.12069E-06 | 0.005074736 |
| 1626.199968 | 146.765536 | 3.31229E-06 | 0.005386452 |
| 1626.239968 | 150.305528 | 3.39219E-06 | 0.005516509 |
| 1626.279968 | 131.98884  | 2.9788E-06  | 0.00484437  |
| 1626.319968 | 136.168206 | 3.07313E-06 | 0.004997887 |
| 1626.359968 | 169.933875 | 3.83517E-06 | 0.006237368 |
| 1626.399968 | 158.201728 | 3.57039E-06 | 0.005806886 |
| 1626.439968 | 125.954544 | 2.84262E-06 | 0.004623349 |
| 1626.479968 | 121.555114 | 2.74333E-06 | 0.004461971 |
| 1626.519968 | 117.198884 | 2.64502E-06 | 0.004302171 |
| 1626.559968 | 114.138073 | 2.57594E-06 | 0.004189917 |
| 1626.599968 | 116.562896 | 2.63066E-06 | 0.004279035 |
| 1626.639968 | 137.344356 | 3.09967E-06 | 0.005042048 |
| 1626.679968 | 150.543961 | 3.39757E-06 | 0.005526755 |
| 1626.719968 | 150.520203 | 3.39703E-06 | 0.005526019 |
| 1626.759968 | 135.828862 | 3.06547E-06 | 0.004986781 |
| 1626.799968 | 116.126622 | 2.62082E-06 | 0.004263544 |
| 1626.839968 | 114.789063 | 2.59063E-06 | 0.004214539 |
| 1626.879968 | 115.155273 | 2.59889E-06 | 0.004228089 |
| 1626.919968 | 127.970414 | 2.88811E-06 | 0.00469873  |
| 1626.959968 | 137.321433 | 3.09915E-06 | 0.005042199 |
| 1626.999968 | 127.928199 | 2.88716E-06 | 0.004697411 |
| 1627.039968 | 134.524653 | 3.03603E-06 | 0.004939749 |
| 1627.079968 | 153.800179 | 3.47106E-06 | 0.005647685 |
| 1627.119968 | 168.612701 | 3.80535E-06 | 0.006191767 |
| 1627.159968 | 179.481776 | 4.05065E-06 | 0.006591062 |
| 1627.199968 | 170.640739 | 3.85112E-06 | 0.006266549 |
| 1627.239968 | 157.259559 | 3.54913E-06 | 0.005775285 |
| 1627.279968 | 139.843869 | 3.15608E-06 | 0.005135828 |
| 1627.319968 | 137.056661 | 3.09318E-06 | 0.00503359  |
| 1627.359968 | 141.515974 | 3.19382E-06 | 0.005197492 |
| 1627.399968 | 157.247614 | 3.54886E-06 | 0.005775414 |
| 1627.439968 | 162.848984 | 3.67527E-06 | 0.005981289 |
| 1627.479968 | 149.632294 | 3.37699E-06 | 0.005495988 |
| 1627.519968 | 134.108652 | 3.02665E-06 | 0.004925926 |

|             |            |             |             |
|-------------|------------|-------------|-------------|
| 1627.559968 | 126.395668 | 2.85257E-06 | 0.004642736 |
| 1627.599968 | 129.491204 | 2.92244E-06 | 0.004756557 |
| 1627.639968 | 124.382466 | 2.80714E-06 | 0.004569012 |
| 1627.679968 | 106.220631 | 2.39725E-06 | 0.003901959 |
| 1627.719968 | 104.985994 | 2.36939E-06 | 0.0038567   |
| 1627.759968 | 109.116772 | 2.46261E-06 | 0.004008544 |
| 1627.799968 | 122.595054 | 2.7668E-06  | 0.004503796 |
| 1627.839968 | 132.485019 | 2.99E-06    | 0.004867245 |
| 1627.879968 | 124.118772 | 2.80119E-06 | 0.004559998 |
| 1627.919968 | 122.717545 | 2.76956E-06 | 0.004508629 |
| 1627.959968 | 114.659389 | 2.5877E-06  | 0.004212676 |
| 1627.999968 | 125.582352 | 2.83422E-06 | 0.004614108 |
| 1628.039968 | 135.927903 | 3.0677E-06  | 0.004994344 |
| 1628.079968 | 135.673252 | 3.06196E-06 | 0.00498511  |
| 1628.119968 | 120.209529 | 2.71296E-06 | 0.004417027 |
| 1628.159968 | 116.496441 | 2.62916E-06 | 0.004280697 |
| 1628.199968 | 130.878848 | 2.95375E-06 | 0.004809301 |
| 1628.239968 | 137.354016 | 3.09989E-06 | 0.005047363 |
| 1628.279968 | 137.046213 | 3.09294E-06 | 0.005036176 |
| 1628.319968 | 161.142475 | 3.63676E-06 | 0.005921811 |
| 1628.359968 | 179.065672 | 4.04126E-06 | 0.006580631 |
| 1628.399968 | 159.184443 | 3.59257E-06 | 0.005850143 |
| 1628.439968 | 147.488173 | 3.3286E-06  | 0.00542043  |
| 1628.479968 | 154.800239 | 3.49363E-06 | 0.0056893   |
| 1628.519968 | 144.390608 | 3.25869E-06 | 0.00530685  |
| 1628.559968 | 121.945763 | 2.75215E-06 | 0.004482035 |
| 1628.599968 | 115.518266 | 2.60709E-06 | 0.004245901 |
| 1628.639968 | 114.626933 | 2.58697E-06 | 0.004213243 |
| 1628.679968 | 108.133762 | 2.44043E-06 | 0.003974677 |
| 1628.719968 | 109.950584 | 2.48143E-06 | 0.004041557 |
| 1628.759968 | 120.310689 | 2.71524E-06 | 0.004422482 |
| 1628.799968 | 139.246044 | 3.14259E-06 | 0.005118649 |
| 1628.839968 | 151.815058 | 3.42625E-06 | 0.00558082  |
| 1628.879968 | 159.497049 | 3.59963E-06 | 0.005863359 |
| 1628.919968 | 156.260206 | 3.52658E-06 | 0.005744509 |
| 1628.959968 | 132.52966  | 2.99101E-06 | 0.004872235 |
| 1628.999968 | 121.441934 | 2.74078E-06 | 0.004464723 |
| 1629.039968 | 136.119885 | 3.07204E-06 | 0.00500447  |
| 1629.079968 | 154.965254 | 3.49735E-06 | 0.005697463 |
| 1629.119968 | 171.720077 | 3.87548E-06 | 0.006313627 |
| 1629.159968 | 159.661909 | 3.60335E-06 | 0.005870429 |
| 1629.199968 | 135.907567 | 3.06724E-06 | 0.004997155 |
| 1629.239968 | 134.158809 | 3.02778E-06 | 0.004932976 |
| 1629.279968 | 145.918624 | 3.29318E-06 | 0.005365512 |
| 1629.319968 | 159.498464 | 3.59966E-06 | 0.005864995 |
| 1629.359968 | 161.198585 | 3.63803E-06 | 0.005927656 |

|             |            |             |             |
|-------------|------------|-------------|-------------|
| 1629.399968 | 153.585927 | 3.46622E-06 | 0.005647859 |
| 1629.439968 | 139.883387 | 3.15697E-06 | 0.005144098 |
| 1629.479968 | 149.501165 | 3.37403E-06 | 0.005497919 |
| 1629.519968 | 149.993498 | 3.38514E-06 | 0.00551616  |
| 1629.559968 | 135.966373 | 3.06857E-06 | 0.005000422 |
| 1629.599968 | 121.714613 | 2.74693E-06 | 0.004476396 |
| 1629.639968 | 109.186635 | 2.46419E-06 | 0.004015743 |
| 1629.679968 | 97.828741  | 2.20786E-06 | 0.003598103 |
| 1629.719968 | 89.351218  | 2.01653E-06 | 0.003286383 |
| 1629.759968 | 88.244747  | 1.99156E-06 | 0.003245766 |
| 1629.799968 | 98.776425  | 2.22925E-06 | 0.003633226 |
| 1629.839968 | 111.954739 | 2.52666E-06 | 0.004118056 |
| 1629.879968 | 115.602904 | 2.609E-06   | 0.004252351 |
| 1629.919968 | 100.855685 | 2.27617E-06 | 0.003709979 |
| 1629.959968 | 105.815663 | 2.38811E-06 | 0.003892527 |
| 1629.999968 | 123.290986 | 2.78251E-06 | 0.004535484 |
| 1630.039968 | 125.473748 | 2.83177E-06 | 0.004615895 |
| 1630.079968 | 127.813387 | 2.88457E-06 | 0.00470208  |
| 1630.119968 | 131.74455  | 2.97329E-06 | 0.004846821 |
| 1630.159968 | 133.435691 | 3.01146E-06 | 0.004909158 |
| 1630.199968 | 121.160997 | 2.73443E-06 | 0.004457676 |
| 1630.239968 | 117.780517 | 2.65814E-06 | 0.00433341  |
| 1630.279968 | 152.167585 | 3.43421E-06 | 0.005598724 |
| 1630.319968 | 162.930128 | 3.67711E-06 | 0.005994859 |
| 1630.359968 | 157.065457 | 3.54475E-06 | 0.005779216 |
| 1630.399968 | 146.569824 | 3.30788E-06 | 0.005393162 |
| 1630.439968 | 164.957182 | 3.72285E-06 | 0.00606989  |
| 1630.479968 | 181.71218  | 4.10099E-06 | 0.006686583 |
| 1630.519968 | 170.435124 | 3.84648E-06 | 0.006271768 |
| 1630.559968 | 138.391126 | 3.12329E-06 | 0.00509272  |
| 1630.599968 | 121.15867  | 2.73438E-06 | 0.004458684 |
| 1630.639968 | 118.922265 | 2.68391E-06 | 0.004376491 |
| 1630.679968 | 119.746961 | 2.70252E-06 | 0.004406949 |
| 1630.719968 | 123.182208 | 2.78005E-06 | 0.004533484 |
| 1630.759968 | 132.953151 | 3.00057E-06 | 0.004893205 |
| 1630.799968 | 140.637471 | 3.17399E-06 | 0.005176146 |
| 1630.839968 | 182.247474 | 4.11307E-06 | 0.006707762 |
| 1630.879968 | 233.819434 | 5.27698E-06 | 0.008606119 |
| 1630.919968 | 240.332693 | 5.42397E-06 | 0.008846068 |
| 1630.959968 | 225.134349 | 5.08097E-06 | 0.008286857 |
| 1630.999968 | 202.190447 | 4.56316E-06 | 0.007442509 |
| 1631.039968 | 164.983573 | 3.72345E-06 | 0.006073095 |
| 1631.079968 | 131.222372 | 2.96151E-06 | 0.004830453 |
| 1631.119968 | 104.591492 | 2.36048E-06 | 0.003850233 |
| 1631.159968 | 107.338992 | 2.42249E-06 | 0.003951471 |
| 1631.199968 | 146.868563 | 3.31462E-06 | 0.005406806 |

|             |            |             |             |
|-------------|------------|-------------|-------------|
| 1631.239968 | 184.086279 | 4.15457E-06 | 0.006777102 |
| 1631.279968 | 195.541239 | 4.41309E-06 | 0.007198991 |
| 1631.319968 | 189.69868  | 4.28123E-06 | 0.006984064 |
| 1631.359968 | 189.772728 | 4.28291E-06 | 0.006986962 |
| 1631.399968 | 198.391236 | 4.47741E-06 | 0.007304453 |
| 1631.439968 | 199.072485 | 4.49279E-06 | 0.007329715 |
| 1631.479968 | 192.554527 | 4.34569E-06 | 0.007089902 |
| 1631.519968 | 173.556214 | 3.91692E-06 | 0.006390536 |
| 1631.559968 | 152.778595 | 3.448E-06   | 0.005625619 |
| 1631.599968 | 131.347827 | 2.96434E-06 | 0.004836613 |
| 1631.639968 | 127.348223 | 2.87407E-06 | 0.004689451 |
| 1631.679968 | 133.251291 | 3.0073E-06  | 0.004906945 |
| 1631.719968 | 113.206252 | 2.55491E-06 | 0.004168893 |
| 1631.759968 | 101.536327 | 2.29153E-06 | 0.003739233 |
| 1631.799968 | 119.808945 | 2.70392E-06 | 0.004412258 |
| 1631.839968 | 141.890388 | 3.20227E-06 | 0.00522559  |
| 1631.879968 | 149.195671 | 3.36714E-06 | 0.005494766 |
| 1631.919968 | 162.264522 | 3.66208E-06 | 0.005976228 |
| 1631.959968 | 153.747699 | 3.46987E-06 | 0.005662691 |
| 1631.999968 | 137.496348 | 3.1031E-06  | 0.005064261 |
| 1632.039968 | 137.037419 | 3.09274E-06 | 0.005047481 |
| 1632.079968 | 123.607106 | 2.78964E-06 | 0.004552916 |
| 1632.119968 | 127.978041 | 2.88829E-06 | 0.004714029 |
| 1632.159968 | 136.062773 | 3.07075E-06 | 0.005011951 |
| 1632.199968 | 142.682502 | 3.22015E-06 | 0.005255921 |
| 1632.239968 | 151.584091 | 3.42104E-06 | 0.005583961 |
| 1632.279968 | 167.535458 | 3.78104E-06 | 0.006171719 |
| 1632.319968 | 174.500355 | 3.93823E-06 | 0.006428451 |
| 1632.359968 | 166.199103 | 3.75088E-06 | 0.00612279  |
| 1632.399968 | 172.692896 | 3.89744E-06 | 0.006362178 |
| 1632.439968 | 177.042318 | 3.9956E-06  | 0.006522575 |
| 1632.479968 | 151.386996 | 3.41659E-06 | 0.005577521 |
| 1632.519968 | 128.250887 | 2.89444E-06 | 0.004725237 |
| 1632.559968 | 123.537042 | 2.78806E-06 | 0.004551673 |
| 1632.599968 | 130.39363  | 2.9428E-06  | 0.004804419 |
| 1632.639968 | 122.995263 | 2.77583E-06 | 0.004531934 |
| 1632.679968 | 127.218772 | 2.87115E-06 | 0.00468767  |
| 1632.719968 | 141.175373 | 3.18613E-06 | 0.005202061 |
| 1632.759968 | 134.704245 | 3.04009E-06 | 0.004963733 |
| 1632.799968 | 125.532852 | 2.8331E-06  | 0.004625888 |
| 1632.839968 | 141.87401  | 3.2019E-06  | 0.005228188 |
| 1632.879968 | 148.919921 | 3.36092E-06 | 0.005487971 |
| 1632.919968 | 140.371569 | 3.16799E-06 | 0.005173075 |
| 1632.959968 | 138.583655 | 3.12764E-06 | 0.005107311 |
| 1632.999968 | 136.639224 | 3.08376E-06 | 0.005035775 |
| 1633.039968 | 138.930642 | 3.13547E-06 | 0.00512035  |

|             |            |             |             |
|-------------|------------|-------------|-------------|
| 1633.079968 | 135.173345 | 3.05067E-06 | 0.004981995 |
| 1633.119968 | 140.882845 | 3.17953E-06 | 0.005192553 |
| 1633.159968 | 154.13642  | 3.47864E-06 | 0.005681183 |
| 1633.199968 | 166.536049 | 3.75849E-06 | 0.00613836  |
| 1633.239968 | 174.076972 | 3.92867E-06 | 0.006416469 |
| 1633.279968 | 180.650168 | 4.07702E-06 | 0.006658919 |
| 1633.319968 | 179.673022 | 4.05497E-06 | 0.006623063 |
| 1633.359968 | 164.087983 | 3.70324E-06 | 0.006048719 |
| 1633.399968 | 145.659881 | 3.28734E-06 | 0.005369542 |
| 1633.439968 | 132.992214 | 3.00145E-06 | 0.004902687 |
| 1633.479968 | 124.938118 | 2.81968E-06 | 0.00460589  |
| 1633.519968 | 120.783102 | 2.72591E-06 | 0.004452822 |
| 1633.559968 | 116.619363 | 2.63194E-06 | 0.004299426 |
| 1633.599968 | 109.998499 | 2.48251E-06 | 0.004055433 |
| 1633.639968 | 116.103251 | 2.62029E-06 | 0.004280608 |
| 1633.679968 | 129.656081 | 2.92616E-06 | 0.004780404 |
| 1633.719968 | 124.564019 | 2.81124E-06 | 0.004592773 |
| 1633.759968 | 131.880935 | 2.97637E-06 | 0.004862673 |
| 1633.799968 | 136.559778 | 3.08196E-06 | 0.005035313 |
| 1633.839968 | 136.060713 | 3.0707E-06  | 0.005017034 |
| 1633.879968 | 133.439029 | 3.01153E-06 | 0.004920483 |
| 1633.919968 | 134.526341 | 3.03607E-06 | 0.004960699 |
| 1633.959968 | 125.184194 | 2.82523E-06 | 0.004616317 |
| 1633.999968 | 111.057317 | 2.50641E-06 | 0.004095472 |
| 1634.039968 | 102.05353  | 2.30321E-06 | 0.003763531 |
| 1634.079968 | 98.561164  | 2.22439E-06 | 0.003634828 |
| 1634.119968 | 115.485904 | 2.60636E-06 | 0.004259098 |
| 1634.159968 | 132.544181 | 2.99134E-06 | 0.004888324 |
| 1634.199968 | 136.227714 | 3.07447E-06 | 0.005024298 |
| 1634.239968 | 132.787439 | 2.99683E-06 | 0.004897535 |
| 1634.279968 | 137.207411 | 3.09658E-06 | 0.005060679 |
| 1634.319968 | 133.659384 | 3.01651E-06 | 0.004929936 |
| 1634.359968 | 131.30607  | 2.9634E-06  | 0.004843254 |
| 1634.399968 | 142.430515 | 3.21446E-06 | 0.005253711 |
| 1634.439968 | 163.379709 | 3.68725E-06 | 0.006026593 |
| 1634.479968 | 169.206599 | 3.81876E-06 | 0.006241682 |
| 1634.519968 | 158.127374 | 3.56871E-06 | 0.005833135 |
| 1634.559968 | 128.333804 | 2.89632E-06 | 0.004734201 |
| 1634.599968 | 107.330494 | 2.4223E-06  | 0.003959491 |
| 1634.639968 | 112.303342 | 2.53453E-06 | 0.004143044 |
| 1634.679968 | 117.955118 | 2.66208E-06 | 0.004351653 |
| 1634.719968 | 124.958958 | 2.82015E-06 | 0.004610155 |
| 1634.759968 | 134.621912 | 3.03823E-06 | 0.004966775 |
| 1634.799968 | 150.491346 | 3.39638E-06 | 0.005552402 |
| 1634.839968 | 155.266574 | 3.50415E-06 | 0.005728725 |
| 1634.879968 | 134.777368 | 3.04174E-06 | 0.004972876 |



|             |            |             |             |
|-------------|------------|-------------|-------------|
| 1634.919968 | 115.424617 | 2.60497E-06 | 0.004258922 |
| 1634.959968 | 112.129183 | 2.5306E-06  | 0.004137429 |
| 1634.999968 | 124.900023 | 2.81882E-06 | 0.00460877  |
| 1635.039968 | 133.041818 | 3.00257E-06 | 0.00490932  |
| 1635.079968 | 131.165716 | 2.96023E-06 | 0.004840209 |
| 1635.119968 | 147.206272 | 3.32224E-06 | 0.005432262 |
| 1635.159968 | 152.351875 | 3.43837E-06 | 0.005622284 |
| 1635.199968 | 138.751626 | 3.13143E-06 | 0.005120516 |
| 1635.239968 | 144.859254 | 3.26927E-06 | 0.005346044 |
| 1635.279968 | 133.838491 | 3.02055E-06 | 0.004939442 |
| 1635.319968 | 145.630926 | 3.28669E-06 | 0.005374785 |
| 1635.359968 | 155.956566 | 3.51972E-06 | 0.005756013 |
| 1635.399968 | 149.31581  | 3.36985E-06 | 0.005511052 |
| 1635.439968 | 141.567563 | 3.19498E-06 | 0.005225202 |
| 1635.479968 | 145.798503 | 3.29047E-06 | 0.005381496 |
| 1635.519968 | 155.690842 | 3.51373E-06 | 0.005746768 |
| 1635.559968 | 153.319    | 3.4602E-06  | 0.005659359 |
| 1635.599968 | 141.693377 | 3.19782E-06 | 0.005230358 |
| 1635.639968 | 117.696852 | 2.65625E-06 | 0.004344675 |
| 1635.679968 | 105.615454 | 2.38359E-06 | 0.003898796 |
| 1635.719968 | 118.669934 | 2.67822E-06 | 0.00438081  |
| 1635.759968 | 131.235418 | 2.9618E-06  | 0.004844795 |
| 1635.799968 | 130.194011 | 2.9383E-06  | 0.004806467 |
| 1635.839968 | 139.293031 | 3.14365E-06 | 0.005142508 |
| 1635.879968 | 132.264878 | 2.98503E-06 | 0.004883157 |
| 1635.919968 | 122.16497  | 2.75709E-06 | 0.004510384 |
| 1635.959968 | 117.307035 | 2.64746E-06 | 0.004331133 |
| 1635.999968 | 113.36898  | 2.55858E-06 | 0.004185837 |
| 1636.039968 | 115.904069 | 2.61579E-06 | 0.004279543 |
| 1636.079968 | 131.212847 | 2.96129E-06 | 0.004844909 |
| 1636.119968 | 127.098593 | 2.86844E-06 | 0.004693109 |
| 1636.159968 | 121.427053 | 2.74044E-06 | 0.004483797 |
| 1636.199968 | 131.347108 | 2.96432E-06 | 0.004850222 |
| 1636.239968 | 137.352764 | 3.09986E-06 | 0.005072116 |
| 1636.279968 | 148.346378 | 3.34797E-06 | 0.005478218 |
| 1636.319968 | 156.108301 | 3.52315E-06 | 0.005764996 |
| 1636.359968 | 136.719519 | 3.08557E-06 | 0.005049102 |
| 1636.399968 | 121.975653 | 2.75282E-06 | 0.004504716 |
| 1636.439968 | 120.920903 | 2.72902E-06 | 0.004465871 |
| 1636.479968 | 116.327064 | 2.62534E-06 | 0.004296316 |
| 1636.519968 | 106.139633 | 2.39542E-06 | 0.003920159 |
| 1636.559968 | 105.56595  | 2.38248E-06 | 0.003899066 |
| 1636.599968 | 123.518737 | 2.78765E-06 | 0.004562261 |
| 1636.639968 | 126.506167 | 2.85507E-06 | 0.004672718 |
| 1636.679968 | 132.604133 | 2.99269E-06 | 0.004898077 |
| 1636.719968 | 141.810767 | 3.20047E-06 | 0.005238276 |

|             |            |             |             |
|-------------|------------|-------------|-------------|
| 1636.759968 | 139.230028 | 3.14223E-06 | 0.005143073 |
| 1636.799968 | 126.418179 | 2.85308E-06 | 0.004669925 |
| 1636.839968 | 114.156219 | 2.57635E-06 | 0.004217068 |
| 1636.879968 | 107.471808 | 2.42549E-06 | 0.003970234 |
| 1636.919968 | 117.448633 | 2.65065E-06 | 0.004338905 |
| 1636.959968 | 116.52068  | 2.62971E-06 | 0.004304729 |
| 1636.999968 | 121.154217 | 2.73428E-06 | 0.004476019 |
| 1637.039968 | 132.503963 | 2.99043E-06 | 0.004895453 |
| 1637.079968 | 137.7687   | 3.10925E-06 | 0.005090087 |
| 1637.119968 | 144.925596 | 3.27077E-06 | 0.005354641 |
| 1637.159968 | 140.961382 | 3.1813E-06  | 0.0052083   |
| 1637.199968 | 155.231626 | 3.50336E-06 | 0.005735703 |
| 1637.239968 | 166.04968  | 3.74751E-06 | 0.006135573 |
| 1637.279968 | 173.803382 | 3.9225E-06  | 0.006422231 |
| 1637.319968 | 177.015272 | 3.99499E-06 | 0.006541074 |
| 1637.359968 | 164.721643 | 3.71754E-06 | 0.006086948 |
| 1637.399968 | 155.159438 | 3.50173E-06 | 0.005733737 |
| 1637.439968 | 134.024247 | 3.02474E-06 | 0.004952831 |
| 1637.479968 | 119.015754 | 2.68602E-06 | 0.004398304 |
| 1637.519968 | 104.8528   | 2.36638E-06 | 0.003874997 |
| 1637.559968 | 104.981751 | 2.36929E-06 | 0.003879858 |
| 1637.599968 | 123.94124  | 2.79718E-06 | 0.004580664 |
| 1637.639968 | 124.169415 | 2.80233E-06 | 0.004589209 |
| 1637.679968 | 125.368556 | 2.82939E-06 | 0.004633641 |
| 1637.719968 | 131.171612 | 2.96036E-06 | 0.004848242 |
| 1637.759968 | 124.252239 | 2.8042E-06  | 0.004592606 |
| 1637.799968 | 127.633001 | 2.8805E-06  | 0.004717681 |
| 1637.839968 | 138.266574 | 3.12048E-06 | 0.005110853 |
| 1637.879968 | 145.016598 | 3.27282E-06 | 0.005360491 |
| 1637.919968 | 149.003993 | 3.36281E-06 | 0.005508018 |
| 1637.959968 | 146.270297 | 3.30112E-06 | 0.005407097 |
| 1637.999968 | 141.0878   | 3.18416E-06 | 0.005215646 |
| 1638.039968 | 145.226839 | 3.27757E-06 | 0.005368787 |
| 1638.079968 | 156.448208 | 3.53082E-06 | 0.005783762 |
| 1638.119968 | 158.267334 | 3.57187E-06 | 0.005851157 |
| 1638.159968 | 155.970435 | 3.52004E-06 | 0.005766381 |
| 1638.199968 | 157.812347 | 3.5616E-06  | 0.005834621 |
| 1638.239968 | 161.173071 | 3.63745E-06 | 0.005959019 |
| 1638.279968 | 189.449581 | 4.27561E-06 | 0.007004651 |
| 1638.319968 | 200.693967 | 4.52938E-06 | 0.007420579 |
| 1638.359968 | 184.975424 | 4.17464E-06 | 0.006839559 |
| 1638.399968 | 165.553835 | 3.73632E-06 | 0.006121586 |
| 1638.439968 | 150.766321 | 3.40259E-06 | 0.005574933 |
| 1638.479968 | 146.837818 | 3.31393E-06 | 0.0054298   |
| 1638.519968 | 142.683608 | 3.22017E-06 | 0.005276313 |
| 1638.559968 | 145.0222   | 3.27295E-06 | 0.005362923 |

|             |            |             |             |
|-------------|------------|-------------|-------------|
| 1638.599968 | 149.02488  | 3.36328E-06 | 0.005511077 |
| 1638.639968 | 144.058419 | 3.2512E-06  | 0.005327543 |
| 1638.679968 | 153.711781 | 3.46906E-06 | 0.00568468  |
| 1638.719968 | 170.220053 | 3.84163E-06 | 0.006295355 |
| 1638.759968 | 173.362925 | 3.91256E-06 | 0.006411746 |
| 1638.799968 | 177.543932 | 4.00692E-06 | 0.006566539 |
| 1638.839968 | 184.934812 | 4.17372E-06 | 0.006840061 |
| 1638.879968 | 184.506149 | 4.16405E-06 | 0.006824373 |
| 1638.919968 | 189.115034 | 4.26806E-06 | 0.006995014 |
| 1638.959968 | 184.533762 | 4.16467E-06 | 0.006825727 |
| 1638.999968 | 188.627056 | 4.25705E-06 | 0.006977305 |
| 1639.039968 | 219.582348 | 4.95567E-06 | 0.008122537 |
| 1639.079968 | 261.886192 | 5.91041E-06 | 0.009687629 |
| 1639.119968 | 283.7677   | 6.40424E-06 | 0.010497321 |
| 1639.159968 | 294.350384 | 6.64308E-06 | 0.010889068 |
| 1639.199968 | 311.294255 | 7.02548E-06 | 0.011516163 |
| 1639.239968 | 350.610221 | 7.91278E-06 | 0.012970952 |
| 1639.279968 | 427.236349 | 9.64213E-06 | 0.015806149 |
| 1639.319968 | 497.667509 | 1.12317E-05 | 0.018412289 |
| 1639.359968 | 545.742288 | 1.23166E-05 | 0.020191412 |
| 1639.399968 | 530.407055 | 1.19705E-05 | 0.019624517 |
| 1639.439968 | 481.955174 | 1.08771E-05 | 0.017832282 |
| 1639.479968 | 435.906895 | 9.83781E-06 | 0.016128895 |
| 1639.519968 | 379.515559 | 8.56514E-06 | 0.014042714 |
| 1639.559968 | 314.929622 | 7.10752E-06 | 0.01165321  |
| 1639.599968 | 245.389514 | 5.5381E-06  | 0.009080268 |
| 1639.639968 | 197.388236 | 4.45478E-06 | 0.007304231 |
| 1639.679968 | 165.053367 | 3.72502E-06 | 0.006107848 |
| 1639.719968 | 152.611388 | 3.44423E-06 | 0.005647567 |
| 1639.759968 | 161.178622 | 3.63758E-06 | 0.005964753 |
| 1639.799968 | 168.180475 | 3.7956E-06  | 0.006224023 |
| 1639.839968 | 161.622019 | 3.64758E-06 | 0.005981454 |
| 1639.879968 | 160.310994 | 3.618E-06   | 0.005933079 |
| 1639.919968 | 172.210384 | 3.88655E-06 | 0.006373628 |
| 1639.959968 | 176.857717 | 3.99143E-06 | 0.006545789 |
| 1639.999968 | 187.027442 | 4.22095E-06 | 0.006922356 |
| 1640.039968 | 193.764663 | 4.373E-06   | 0.007171892 |
| 1640.079968 | 198.945722 | 4.48993E-06 | 0.007363841 |
| 1640.119968 | 224.256479 | 5.06116E-06 | 0.008300904 |
| 1640.159968 | 250.957568 | 5.66376E-06 | 0.009289477 |
| 1640.199968 | 277.11178  | 6.25403E-06 | 0.010257855 |
| 1640.239968 | 314.58713  | 7.09979E-06 | 0.011645365 |
| 1640.279968 | 352.814452 | 7.96253E-06 | 0.01306078  |
| 1640.319968 | 351.546542 | 7.93392E-06 | 0.01301416  |
| 1640.359968 | 331.691602 | 7.48582E-06 | 0.012279435 |
| 1640.399968 | 351.77397  | 7.93905E-06 | 0.013023215 |

|             |            |             |             |
|-------------|------------|-------------|-------------|
| 1640.439968 | 358.913228 | 8.10017E-06 | 0.013287845 |
| 1640.479968 | 320.391841 | 7.2308E-06  | 0.011861979 |
| 1640.519968 | 291.83467  | 6.5863E-06  | 0.01080496  |
| 1640.559968 | 247.186615 | 5.57866E-06 | 0.009152122 |
| 1640.599968 | 214.475914 | 4.84042E-06 | 0.007941197 |
| 1640.639968 | 195.001797 | 4.40092E-06 | 0.007220324 |
| 1640.679968 | 160.762883 | 3.62819E-06 | 0.005952706 |
| 1640.719968 | 153.214092 | 3.45783E-06 | 0.005673329 |
| 1640.759968 | 154.268269 | 3.48162E-06 | 0.005712503 |
| 1640.799968 | 170.795361 | 3.85461E-06 | 0.00632465  |
| 1640.839968 | 180.48035  | 4.07319E-06 | 0.006683453 |
| 1640.879968 | 161.707741 | 3.64952E-06 | 0.005988422 |
| 1640.919968 | 149.71905  | 3.37895E-06 | 0.005544587 |
| 1640.959968 | 153.675285 | 3.46824E-06 | 0.005691238 |
| 1640.999968 | 163.72196  | 3.69498E-06 | 0.006063456 |
| 1641.039968 | 163.548939 | 3.69107E-06 | 0.006057196 |
| 1641.079968 | 149.510874 | 3.37425E-06 | 0.005537418 |
| 1641.119968 | 164.890261 | 3.72134E-06 | 0.006107171 |
| 1641.159968 | 193.125469 | 4.35857E-06 | 0.007153115 |
| 1641.199968 | 207.482537 | 4.68259E-06 | 0.00768507  |
| 1641.239968 | 229.807995 | 5.18645E-06 | 0.008512203 |
| 1641.279968 | 249.715481 | 5.63573E-06 | 0.009249812 |
| 1641.319968 | 271.507595 | 6.12755E-06 | 0.010057267 |
| 1641.359968 | 273.58025  | 6.17433E-06 | 0.01013429  |
| 1641.399968 | 272.007046 | 6.13882E-06 | 0.010076259 |
| 1641.439968 | 263.943999 | 5.95685E-06 | 0.009777809 |
| 1641.479968 | 216.479964 | 4.88565E-06 | 0.008019699 |
| 1641.519968 | 181.398021 | 4.0939E-06  | 0.00672022  |
| 1641.559968 | 169.792122 | 3.83197E-06 | 0.006290411 |
| 1641.599968 | 160.781638 | 3.62862E-06 | 0.005956739 |
| 1641.639968 | 151.339958 | 3.41553E-06 | 0.005607074 |
| 1641.679968 | 138.62565  | 3.12859E-06 | 0.00513614  |
| 1641.719968 | 124.705844 | 2.81444E-06 | 0.004620518 |
| 1641.759968 | 135.761852 | 3.06396E-06 | 0.00503028  |
| 1641.799968 | 160.396378 | 3.61992E-06 | 0.005943189 |
| 1641.839968 | 163.459644 | 3.68906E-06 | 0.00605684  |
| 1641.879968 | 155.255268 | 3.5039E-06  | 0.005752975 |
| 1641.919968 | 161.335541 | 3.64112E-06 | 0.005978425 |
| 1641.959968 | 152.373823 | 3.43886E-06 | 0.005646479 |
| 1641.999968 | 132.856581 | 2.99839E-06 | 0.004923353 |
| 1642.039968 | 134.016679 | 3.02457E-06 | 0.004966464 |
| 1642.079968 | 156.573091 | 3.53364E-06 | 0.005802514 |
| 1642.119968 | 181.983308 | 4.10711E-06 | 0.006744367 |
| 1642.159968 | 183.549577 | 4.14246E-06 | 0.006802579 |
| 1642.199968 | 194.410635 | 4.38758E-06 | 0.007205279 |
| 1642.239968 | 207.121622 | 4.67445E-06 | 0.007676563 |

|             |            |             |             |
|-------------|------------|-------------|-------------|
| 1642.279968 | 206.212696 | 4.65393E-06 | 0.007643061 |
| 1642.319968 | 191.87243  | 4.33029E-06 | 0.007111727 |
| 1642.359968 | 182.330315 | 4.11494E-06 | 0.006758215 |
| 1642.399968 | 165.52342  | 3.73563E-06 | 0.006135404 |
| 1642.439968 | 135.577887 | 3.0598E-06  | 0.005025544 |
| 1642.479968 | 130.746291 | 2.95076E-06 | 0.004846567 |
| 1642.519968 | 134.180218 | 3.02826E-06 | 0.004973979 |
| 1642.559968 | 128.070655 | 2.89038E-06 | 0.004747616 |
| 1642.599968 | 119.971822 | 2.7076E-06  | 0.004447499 |
| 1642.639968 | 123.227415 | 2.78107E-06 | 0.004568299 |
| 1642.679968 | 140.773276 | 3.17706E-06 | 0.005218887 |
| 1642.719968 | 146.044079 | 3.29601E-06 | 0.005414424 |
| 1642.759968 | 139.569806 | 3.1499E-06  | 0.005174523 |
| 1642.799968 | 126.131083 | 2.8466E-06  | 0.004676399 |
| 1642.839968 | 125.16265  | 2.82475E-06 | 0.004640607 |
| 1642.879968 | 140.360605 | 3.16774E-06 | 0.005204222 |
| 1642.919968 | 153.786485 | 3.47075E-06 | 0.005702159 |
| 1642.959968 | 163.251741 | 3.68436E-06 | 0.006053263 |
| 1642.999968 | 158.688806 | 3.58139E-06 | 0.005884216 |
| 1643.039968 | 149.953699 | 3.38425E-06 | 0.005560452 |
| 1643.079968 | 142.173146 | 3.20865E-06 | 0.005272068 |
| 1643.119968 | 148.05906  | 3.34149E-06 | 0.005490464 |
| 1643.159968 | 161.082742 | 3.63541E-06 | 0.005973565 |
| 1643.199968 | 164.864834 | 3.72077E-06 | 0.006113969 |
| 1643.239968 | 160.30653  | 3.6179E-06  | 0.00594507  |
| 1643.279968 | 151.842437 | 3.42687E-06 | 0.005631311 |
| 1643.319968 | 149.400626 | 3.37176E-06 | 0.005540887 |
| 1643.359968 | 159.421474 | 3.59792E-06 | 0.005912679 |
| 1643.399968 | 165.754072 | 3.74084E-06 | 0.006147694 |
| 1643.439968 | 174.100441 | 3.9292E-06  | 0.006457412 |
| 1643.479968 | 168.106602 | 3.79393E-06 | 0.006235251 |
| 1643.519968 | 138.218913 | 3.11941E-06 | 0.00512681  |
| 1643.559968 | 119.572091 | 2.69858E-06 | 0.004435271 |
| 1643.599968 | 106.407382 | 2.40147E-06 | 0.00394705  |
| 1643.639968 | 122.544031 | 2.76565E-06 | 0.00454573  |
| 1643.679968 | 123.820258 | 2.79445E-06 | 0.004593183 |
| 1643.719968 | 100.994602 | 2.27931E-06 | 0.003746543 |
| 1643.759968 | 96.94241   | 2.18786E-06 | 0.003596309 |
| 1643.799968 | 112.443939 | 2.5377E-06  | 0.004171476 |
| 1643.839968 | 118.066702 | 2.6646E-06  | 0.004380178 |
| 1643.879968 | 122.579125 | 2.76644E-06 | 0.004547695 |
| 1643.919968 | 127.33849  | 2.87385E-06 | 0.004724383 |
| 1643.959968 | 122.229816 | 2.75856E-06 | 0.004534957 |
| 1643.999968 | 123.787065 | 2.7937E-06  | 0.004592845 |
| 1644.039968 | 130.137384 | 2.93702E-06 | 0.004828577 |
| 1644.079968 | 144.2593   | 3.25573E-06 | 0.005352683 |

|             |            |             |             |
|-------------|------------|-------------|-------------|
| 1644.119968 | 142.838791 | 3.22367E-06 | 0.005300104 |
| 1644.159968 | 135.321518 | 3.05402E-06 | 0.005021294 |
| 1644.199968 | 133.376335 | 3.01012E-06 | 0.004949236 |
| 1644.239968 | 138.191732 | 3.11879E-06 | 0.005128047 |
| 1644.279968 | 141.684168 | 3.19761E-06 | 0.005257773 |
| 1644.319968 | 150.497214 | 3.39651E-06 | 0.005584953 |
| 1644.359968 | 164.815951 | 3.71967E-06 | 0.006116471 |
| 1644.399968 | 151.095448 | 3.41001E-06 | 0.005607427 |
| 1644.439968 | 134.190383 | 3.02849E-06 | 0.00498017  |
| 1644.479968 | 129.168139 | 2.91514E-06 | 0.004793898 |
| 1644.519968 | 120.014539 | 2.70856E-06 | 0.004454283 |
| 1644.559968 | 115.357488 | 2.60346E-06 | 0.004281543 |
| 1644.599968 | 106.827875 | 2.41096E-06 | 0.003965059 |
| 1644.639968 | 116.430169 | 2.62767E-06 | 0.004321566 |
| 1644.679968 | 128.011666 | 2.88904E-06 | 0.004751554 |
| 1644.719968 | 124.951478 | 2.81998E-06 | 0.004638079 |
| 1644.759968 | 119.012077 | 2.68594E-06 | 0.004417721 |
| 1644.799968 | 103.770446 | 2.34195E-06 | 0.003852047 |
| 1644.839968 | 109.008127 | 2.46016E-06 | 0.004046572 |
| 1644.879968 | 130.275875 | 2.94015E-06 | 0.004836186 |
| 1644.919968 | 143.947885 | 3.2487E-06  | 0.005343857 |
| 1644.959968 | 130.122195 | 2.93668E-06 | 0.004830716 |
| 1644.999968 | 125.348    | 2.82893E-06 | 0.004653589 |
| 1645.039968 | 149.363413 | 3.37092E-06 | 0.005545305 |
| 1645.079968 | 158.755454 | 3.58289E-06 | 0.00589414  |
| 1645.119968 | 162.717862 | 3.67232E-06 | 0.0060414   |
| 1645.159968 | 159.776479 | 3.60593E-06 | 0.005932336 |
| 1645.199968 | 150.440465 | 3.39523E-06 | 0.005585835 |
| 1645.239968 | 148.912778 | 3.36075E-06 | 0.005529247 |
| 1645.279968 | 145.114644 | 3.27504E-06 | 0.00538835  |
| 1645.319968 | 140.050573 | 3.16075E-06 | 0.005200439 |
| 1645.359968 | 145.41783  | 3.28188E-06 | 0.00539987  |
| 1645.399968 | 145.684726 | 3.2879E-06  | 0.005409913 |
| 1645.439968 | 140.051718 | 3.16077E-06 | 0.005200861 |
| 1645.479968 | 132.642851 | 2.99356E-06 | 0.00492585  |
| 1645.519968 | 113.828403 | 2.56895E-06 | 0.004227256 |
| 1645.559968 | 109.655462 | 2.47477E-06 | 0.004072384 |
| 1645.599968 | 118.827727 | 2.68178E-06 | 0.004413131 |
| 1645.639968 | 140.521486 | 3.17137E-06 | 0.00521894  |
| 1645.679968 | 135.470814 | 3.05739E-06 | 0.005031481 |
| 1645.719968 | 122.188109 | 2.75762E-06 | 0.004538263 |
| 1645.759968 | 125.608593 | 2.83481E-06 | 0.004665418 |
| 1645.799968 | 134.989487 | 3.04652E-06 | 0.00501397  |
| 1645.839968 | 132.00627  | 2.9792E-06  | 0.004903283 |
| 1645.879968 | 133.668964 | 3.01672E-06 | 0.004965163 |
| 1645.919968 | 140.789641 | 3.17743E-06 | 0.005229789 |

|             |            |             |             |
|-------------|------------|-------------|-------------|
| 1645.959968 | 136.500326 | 3.08062E-06 | 0.005070581 |
| 1645.999968 | 151.536873 | 3.41998E-06 | 0.005629281 |
| 1646.039968 | 168.028654 | 3.79217E-06 | 0.006242068 |
| 1646.079968 | 181.689136 | 4.10047E-06 | 0.006749703 |
| 1646.119968 | 191.682132 | 4.326E-06   | 0.007121113 |
| 1646.159968 | 177.176995 | 3.99864E-06 | 0.006582398 |
| 1646.199968 | 173.128632 | 3.90727E-06 | 0.006432151 |
| 1646.239968 | 171.661641 | 3.87416E-06 | 0.006377804 |
| 1646.279968 | 175.199634 | 3.95401E-06 | 0.00650941  |
| 1646.319968 | 175.472736 | 3.96018E-06 | 0.006519716 |
| 1646.359968 | 176.805658 | 3.99026E-06 | 0.0065694   |
| 1646.399968 | 161.388801 | 3.64232E-06 | 0.005996716 |
| 1646.439968 | 145.683394 | 3.28787E-06 | 0.005413283 |
| 1646.479968 | 142.235917 | 3.21007E-06 | 0.00528531  |
| 1646.519968 | 145.022708 | 3.27296E-06 | 0.005388995 |
| 1646.559968 | 136.693545 | 3.08498E-06 | 0.005079609 |
| 1646.599968 | 131.090561 | 2.95853E-06 | 0.004871518 |
| 1646.639968 | 133.565215 | 3.01438E-06 | 0.0049636   |
| 1646.679968 | 141.65464  | 3.19695E-06 | 0.00526435  |
| 1646.719968 | 143.934078 | 3.24839E-06 | 0.005349191 |
| 1646.759968 | 134.230581 | 3.0294E-06  | 0.00498869  |
| 1646.799968 | 136.377049 | 3.07784E-06 | 0.005068587 |
| 1646.839968 | 153.081453 | 3.45484E-06 | 0.005689561 |
| 1646.879968 | 164.804646 | 3.71941E-06 | 0.006125424 |
| 1646.919968 | 156.638208 | 3.53511E-06 | 0.005822037 |
| 1646.959968 | 139.860622 | 3.15646E-06 | 0.005198562 |
| 1646.999968 | 134.308806 | 3.03116E-06 | 0.004992325 |
| 1647.039968 | 137.034228 | 3.09267E-06 | 0.005093754 |
| 1647.079968 | 143.03846  | 3.22818E-06 | 0.005317069 |
| 1647.119968 | 136.739487 | 3.08602E-06 | 0.005083045 |
| 1647.159968 | 136.733474 | 3.08588E-06 | 0.005082945 |
| 1647.199968 | 147.647102 | 3.33219E-06 | 0.005488782 |
| 1647.239968 | 148.196601 | 3.34459E-06 | 0.005509344 |
| 1647.279968 | 130.678626 | 2.94923E-06 | 0.004858215 |
| 1647.319968 | 115.856742 | 2.61473E-06 | 0.004307289 |
| 1647.359968 | 116.634594 | 2.63228E-06 | 0.004336313 |
| 1647.399968 | 131.459084 | 2.96685E-06 | 0.004887586 |
| 1647.439968 | 147.742058 | 3.33433E-06 | 0.005493113 |
| 1647.479968 | 135.5372   | 3.05889E-06 | 0.005039453 |
| 1647.519968 | 117.563474 | 2.65324E-06 | 0.004371272 |
| 1647.559968 | 108.529614 | 2.44936E-06 | 0.004035471 |
| 1647.599968 | 110.847563 | 2.50168E-06 | 0.00412176  |
| 1647.639968 | 136.040807 | 3.07025E-06 | 0.005058669 |
| 1647.679968 | 141.760196 | 3.19933E-06 | 0.005271472 |
| 1647.719968 | 142.218102 | 3.20966E-06 | 0.005288628 |
| 1647.759968 | 149.788344 | 3.38051E-06 | 0.005570276 |

|             |            |             |             |
|-------------|------------|-------------|-------------|
| 1647.799968 | 160.695124 | 3.62667E-06 | 0.005976019 |
| 1647.839968 | 184.831174 | 4.17138E-06 | 0.00687377  |
| 1647.879968 | 195.907383 | 4.42136E-06 | 0.007285865 |
| 1647.919968 | 191.041209 | 4.31153E-06 | 0.007105063 |
| 1647.959968 | 171.859539 | 3.87863E-06 | 0.006391828 |
| 1647.999968 | 142.543789 | 3.21701E-06 | 0.00530164  |
| 1648.039968 | 137.118119 | 3.09456E-06 | 0.005099967 |
| 1648.079968 | 146.126877 | 3.29788E-06 | 0.00543517  |
| 1648.119968 | 143.472627 | 3.23798E-06 | 0.005336575 |
| 1648.159968 | 147.841818 | 3.33658E-06 | 0.005499224 |
| 1648.199968 | 155.735718 | 3.51474E-06 | 0.005792991 |
| 1648.239968 | 149.039832 | 3.36362E-06 | 0.005544055 |
| 1648.279968 | 151.210336 | 3.41261E-06 | 0.005624931 |
| 1648.319968 | 158.789937 | 3.58367E-06 | 0.005907031 |
| 1648.359968 | 151.934891 | 3.42896E-06 | 0.005652159 |
| 1648.399968 | 137.974679 | 3.1139E-06  | 0.005132947 |
| 1648.439968 | 134.283028 | 3.03058E-06 | 0.004995731 |
| 1648.479968 | 142.760947 | 3.22192E-06 | 0.005311264 |
| 1648.519968 | 149.957905 | 3.38434E-06 | 0.005579154 |
| 1648.559968 | 150.411522 | 3.39458E-06 | 0.005596166 |
| 1648.599968 | 141.810644 | 3.20047E-06 | 0.005276293 |
| 1648.639968 | 130.469486 | 2.94451E-06 | 0.004854444 |
| 1648.679968 | 117.740581 | 2.65724E-06 | 0.00438094  |
| 1648.719968 | 105.02028  | 2.37016E-06 | 0.003907732 |
| 1648.759968 | 98.047079  | 2.21279E-06 | 0.003648353 |
| 1648.799968 | 97.534087  | 2.20121E-06 | 0.003629352 |
| 1648.839968 | 119.111466 | 2.68818E-06 | 0.004432378 |
| 1648.879968 | 134.041889 | 3.02514E-06 | 0.004988091 |
| 1648.919968 | 142.641681 | 3.21922E-06 | 0.005308243 |
| 1648.959968 | 139.404479 | 3.14616E-06 | 0.0051879   |
| 1648.999968 | 134.42231  | 3.03372E-06 | 0.005002611 |
| 1649.039968 | 126.690283 | 2.85922E-06 | 0.004714973 |
| 1649.079968 | 127.445221 | 2.87626E-06 | 0.004743185 |
| 1649.119968 | 123.166514 | 2.7797E-06  | 0.004584053 |
| 1649.159968 | 144.918852 | 3.27062E-06 | 0.00539377  |
| 1649.199968 | 156.955136 | 3.54226E-06 | 0.005841893 |
| 1649.239968 | 153.427145 | 3.46264E-06 | 0.005710719 |
| 1649.279968 | 142.962807 | 3.22647E-06 | 0.005321355 |
| 1649.319968 | 123.075911 | 2.77765E-06 | 0.004581237 |
| 1649.359968 | 137.304787 | 3.09878E-06 | 0.005111    |
| 1649.399968 | 148.214845 | 3.345E-06   | 0.005517247 |
| 1649.439968 | 134.113272 | 3.02675E-06 | 0.004992442 |
| 1649.479968 | 121.587191 | 2.74405E-06 | 0.004526261 |
| 1649.519968 | 112.260949 | 2.53357E-06 | 0.00417918  |
| 1649.559968 | 115.296437 | 2.60208E-06 | 0.004292287 |
| 1649.599968 | 122.849188 | 2.77254E-06 | 0.004573574 |



|             |            |             |             |
|-------------|------------|-------------|-------------|
| 1649.639968 | 121.114798 | 2.73339E-06 | 0.004509113 |
| 1649.679968 | 129.380588 | 2.91994E-06 | 0.004816966 |
| 1649.719968 | 138.223378 | 3.11951E-06 | 0.005146316 |
| 1649.759968 | 130.354681 | 2.94192E-06 | 0.004853468 |
| 1649.799968 | 131.195356 | 2.9609E-06  | 0.004884887 |
| 1649.839968 | 144.01799  | 3.25029E-06 | 0.005362451 |
| 1649.879968 | 143.411888 | 3.23661E-06 | 0.005340012 |
| 1649.919968 | 120.72868  | 2.72468E-06 | 0.004495501 |
| 1649.959968 | 101.614035 | 2.29329E-06 | 0.003783832 |
| 1649.999968 | 93.0551    | 2.10012E-06 | 0.003465205 |
| 1650.039968 | 105.119065 | 2.37239E-06 | 0.00391454  |
| 1650.079968 | 130.963469 | 2.95566E-06 | 0.00487708  |
| 1650.119968 | 141.597999 | 3.19567E-06 | 0.005273238 |
| 1650.159968 | 129.161939 | 2.91501E-06 | 0.004810225 |
| 1650.199968 | 140.096393 | 3.16178E-06 | 0.00521757  |
| 1650.239968 | 147.55465  | 3.3301E-06  | 0.005495469 |
| 1650.279968 | 134.559153 | 3.03681E-06 | 0.005011591 |
| 1650.319968 | 134.127886 | 3.02708E-06 | 0.00499565  |
| 1650.359968 | 165.423414 | 3.73338E-06 | 0.006161414 |
| 1650.399968 | 193.055998 | 4.357E-06   | 0.007190801 |
| 1650.439968 | 182.259292 | 4.11334E-06 | 0.006788818 |
| 1650.479968 | 151.305998 | 3.41477E-06 | 0.005636002 |
| 1650.519968 | 126.7037   | 2.85953E-06 | 0.004719705 |
| 1650.559968 | 115.922368 | 2.61621E-06 | 0.004318206 |
| 1650.599968 | 113.651676 | 2.56496E-06 | 0.004233723 |
| 1650.639968 | 107.217503 | 2.41975E-06 | 0.003994136 |
| 1650.679968 | 101.935471 | 2.30054E-06 | 0.003797458 |
| 1650.719968 | 93.364064  | 2.1071E-06  | 0.003478227 |
| 1650.759968 | 91.559783  | 2.06638E-06 | 0.003411092 |
| 1650.799968 | 110.182928 | 2.48668E-06 | 0.004105003 |
| 1650.839968 | 128.519742 | 2.90051E-06 | 0.00478828  |
| 1650.879968 | 131.407058 | 2.96567E-06 | 0.004895972 |
| 1650.919968 | 130.707331 | 2.94988E-06 | 0.00487002  |
| 1650.959968 | 135.410445 | 3.05603E-06 | 0.005045375 |
| 1650.999968 | 123.355729 | 2.78397E-06 | 0.004596329 |
| 1651.039968 | 104.510529 | 2.35866E-06 | 0.003894237 |
| 1651.079968 | 100.228123 | 2.26201E-06 | 0.003734758 |
| 1651.119968 | 105.604968 | 2.38336E-06 | 0.003935208 |
| 1651.159968 | 112.66045  | 2.54259E-06 | 0.004198222 |
| 1651.199968 | 135.216487 | 3.05165E-06 | 0.005038881 |
| 1651.239968 | 152.651737 | 3.44514E-06 | 0.005688748 |
| 1651.279968 | 151.123653 | 3.41065E-06 | 0.005631939 |
| 1651.319968 | 150.939669 | 3.4065E-06  | 0.005625218 |
| 1651.359968 | 170.234842 | 3.84196E-06 | 0.006344464 |
| 1651.399968 | 170.259322 | 3.84252E-06 | 0.00634553  |
| 1651.439968 | 153.081555 | 3.45484E-06 | 0.005705457 |

|             |            |             |             |
|-------------|------------|-------------|-------------|
| 1651.479968 | 139.516963 | 3.1487E-06  | 0.005200021 |
| 1651.519968 | 131.110595 | 2.95898E-06 | 0.00488682  |
| 1651.559968 | 133.793193 | 3.01953E-06 | 0.004986928 |
| 1651.599968 | 132.857001 | 2.9984E-06  | 0.004952153 |
| 1651.639968 | 126.275346 | 2.84986E-06 | 0.00470694  |
| 1651.679968 | 116.004464 | 2.61806E-06 | 0.004324196 |
| 1651.719968 | 102.342014 | 2.30972E-06 | 0.003815005 |
| 1651.759968 | 113.112832 | 2.5528E-06  | 0.004216611 |
| 1651.799968 | 135.978238 | 3.06884E-06 | 0.005069109 |
| 1651.839968 | 144.257461 | 3.25569E-06 | 0.005377879 |
| 1651.879968 | 123.199516 | 2.78044E-06 | 0.004592956 |
| 1651.919968 | 119.638924 | 2.70008E-06 | 0.004460322 |
| 1651.959968 | 118.316301 | 2.67023E-06 | 0.00441112  |
| 1651.999968 | 126.281848 | 2.85001E-06 | 0.004708209 |
| 1652.039968 | 135.750664 | 3.0637E-06  | 0.00506136  |
| 1652.079968 | 123.838031 | 2.79485E-06 | 0.004617319 |
| 1652.119968 | 126.379276 | 2.8522E-06  | 0.004712184 |
| 1652.159968 | 135.463389 | 3.05722E-06 | 0.005051017 |
| 1652.199968 | 126.722347 | 2.85995E-06 | 0.004725204 |
| 1652.239968 | 111.957852 | 2.52673E-06 | 0.004174769 |
| 1652.279968 | 100.035316 | 2.25766E-06 | 0.003730283 |
| 1652.319968 | 116.375488 | 2.62643E-06 | 0.004339707 |
| 1652.359968 | 130.105333 | 2.9363E-06  | 0.004851818 |
| 1652.399968 | 136.80214  | 3.08743E-06 | 0.005101675 |
| 1652.439968 | 139.010577 | 3.13728E-06 | 0.005184159 |
| 1652.479968 | 131.085308 | 2.95841E-06 | 0.004888718 |
| 1652.519968 | 120.711191 | 2.72428E-06 | 0.004501933 |
| 1652.559968 | 120.913879 | 2.72886E-06 | 0.004509601 |
| 1652.599968 | 130.022491 | 2.93443E-06 | 0.004849433 |
| 1652.639968 | 140.042896 | 3.16057E-06 | 0.005223289 |
| 1652.679968 | 140.663183 | 3.17457E-06 | 0.005246552 |
| 1652.719968 | 148.820624 | 3.35867E-06 | 0.005550948 |
| 1652.759968 | 167.209333 | 3.77368E-06 | 0.00623699  |
| 1652.799968 | 166.903347 | 3.76678E-06 | 0.006225727 |
| 1652.839968 | 151.335626 | 3.41543E-06 | 0.005645166 |
| 1652.879968 | 146.227635 | 3.30015E-06 | 0.005454759 |
| 1652.919968 | 144.387538 | 3.25863E-06 | 0.005386247 |
| 1652.959968 | 130.548728 | 2.9463E-06  | 0.004870121 |
| 1652.999968 | 112.04898  | 2.52879E-06 | 0.004180089 |
| 1653.039968 | 111.989185 | 2.52744E-06 | 0.004177959 |
| 1653.079968 | 124.732306 | 2.81503E-06 | 0.004653477 |
| 1653.119968 | 134.381626 | 3.03281E-06 | 0.005013592 |
| 1653.159968 | 139.434107 | 3.14683E-06 | 0.005202219 |
| 1653.199968 | 148.355148 | 3.34817E-06 | 0.005535193 |
| 1653.239968 | 154.237269 | 3.48092E-06 | 0.005754797 |
| 1653.279968 | 157.183248 | 3.54741E-06 | 0.005864857 |

|             |            |             |             |
|-------------|------------|-------------|-------------|
| 1653.319968 | 157.97924  | 3.56537E-06 | 0.0058947   |
| 1653.359968 | 157.975273 | 3.56528E-06 | 0.005894694 |
| 1653.399968 | 158.27105  | 3.57196E-06 | 0.005905874 |
| 1653.439968 | 154.525135 | 3.48742E-06 | 0.005766235 |
| 1653.479968 | 141.169032 | 3.18599E-06 | 0.005267968 |
| 1653.519968 | 140.043273 | 3.16058E-06 | 0.005226085 |
| 1653.559968 | 147.081352 | 3.31942E-06 | 0.005488862 |
| 1653.599968 | 129.213111 | 2.91616E-06 | 0.004822162 |
| 1653.639968 | 108.822388 | 2.45597E-06 | 0.00406129  |
| 1653.679968 | 100.561585 | 2.26953E-06 | 0.003753084 |
| 1653.719968 | 92.775566  | 2.09382E-06 | 0.003462584 |
| 1653.759968 | 108.38414  | 2.44608E-06 | 0.004045228 |
| 1653.799968 | 119.51694  | 2.69733E-06 | 0.004460846 |
| 1653.839968 | 114.689226 | 2.58838E-06 | 0.00428076  |
| 1653.879968 | 112.257969 | 2.53351E-06 | 0.004190115 |
| 1653.919968 | 115.951734 | 2.61687E-06 | 0.004328092 |
| 1653.959968 | 131.398051 | 2.96547E-06 | 0.00490477  |
| 1653.999968 | 142.682614 | 3.22015E-06 | 0.005326124 |
| 1654.039967 | 146.703492 | 3.31089E-06 | 0.00547635  |
| 1654.079967 | 158.452347 | 3.57605E-06 | 0.005915071 |
| 1654.119967 | 144.920458 | 3.27065E-06 | 0.005410052 |
| 1654.159967 | 115.646586 | 2.60998E-06 | 0.004317328 |
| 1654.199967 | 113.702366 | 2.5661E-06  | 0.004244849 |
| 1654.239967 | 129.029455 | 2.91202E-06 | 0.004817172 |
| 1654.279967 | 129.872949 | 2.93105E-06 | 0.00484878  |
| 1654.319967 | 120.014582 | 2.70856E-06 | 0.004480828 |
| 1654.359967 | 118.754529 | 2.68012E-06 | 0.00443389  |
| 1654.399967 | 111.303485 | 2.51196E-06 | 0.004155794 |
| 1654.439967 | 104.12656  | 2.34999E-06 | 0.00388792  |
| 1654.479967 | 114.144664 | 2.57609E-06 | 0.004262083 |
| 1654.519967 | 121.733412 | 2.74735E-06 | 0.004545551 |
| 1654.559967 | 98.724844  | 2.22808E-06 | 0.003686496 |
| 1654.599967 | 94.690062  | 2.13702E-06 | 0.003535918 |
| 1654.639967 | 109.071928 | 2.4616E-06  | 0.004073064 |
| 1654.679967 | 118.111968 | 2.66562E-06 | 0.004410752 |
| 1654.719967 | 115.429453 | 2.60508E-06 | 0.004310681 |
| 1654.759967 | 128.59094  | 2.90212E-06 | 0.004802309 |
| 1654.799967 | 127.646111 | 2.88079E-06 | 0.004767139 |
| 1654.839967 | 111.58673  | 2.51836E-06 | 0.004167478 |
| 1654.879967 | 111.487409 | 2.51612E-06 | 0.004163869 |
| 1654.919967 | 124.115421 | 2.80111E-06 | 0.004635616 |
| 1654.959967 | 132.43225  | 2.98881E-06 | 0.004946363 |
| 1654.999967 | 135.566071 | 3.05954E-06 | 0.005063534 |
| 1655.039967 | 135.526378 | 3.05864E-06 | 0.005062174 |
| 1655.079967 | 139.246955 | 3.14261E-06 | 0.005201271 |
| 1655.119967 | 139.685102 | 3.1525E-06  | 0.005217763 |

|             |            |             |             |
|-------------|------------|-------------|-------------|
| 1655.159967 | 132.390503 | 2.98787E-06 | 0.004945402 |
| 1655.199967 | 155.907438 | 3.51861E-06 | 0.005824009 |
| 1655.239967 | 169.370055 | 3.82245E-06 | 0.006327066 |
| 1655.279967 | 158.800733 | 3.58391E-06 | 0.005932377 |
| 1655.319967 | 140.162037 | 3.16326E-06 | 0.005236211 |
| 1655.359967 | 127.875279 | 2.88597E-06 | 0.004777314 |
| 1655.399967 | 133.194602 | 3.00602E-06 | 0.00497616  |
| 1655.439967 | 129.435883 | 2.92119E-06 | 0.004835851 |
| 1655.479967 | 135.474283 | 3.05747E-06 | 0.005061573 |
| 1655.519967 | 133.421084 | 3.01113E-06 | 0.004984983 |
| 1655.559967 | 127.076959 | 2.86795E-06 | 0.004748063 |
| 1655.599967 | 111.7838   | 2.5228E-06  | 0.004176755 |
| 1655.639967 | 111.345831 | 2.51292E-06 | 0.004160491 |
| 1655.679967 | 117.216275 | 2.64541E-06 | 0.004379949 |
| 1655.719967 | 113.92944  | 2.57123E-06 | 0.004257235 |
| 1655.759967 | 118.553965 | 2.6756E-06  | 0.004430148 |
| 1655.799967 | 124.032676 | 2.79924E-06 | 0.004634989 |
| 1655.839967 | 121.774919 | 2.74829E-06 | 0.004550729 |
| 1655.879967 | 129.530297 | 2.92332E-06 | 0.004840664 |
| 1655.919967 | 133.584463 | 3.01482E-06 | 0.004992293 |
| 1655.959967 | 143.107078 | 3.22973E-06 | 0.005348299 |
| 1655.999967 | 149.091355 | 3.36478E-06 | 0.005572083 |
| 1656.039967 | 146.479654 | 3.30584E-06 | 0.005474606 |
| 1656.079967 | 131.449587 | 2.96663E-06 | 0.004912983 |
| 1656.119967 | 119.016656 | 2.68604E-06 | 0.004448405 |
| 1656.159967 | 120.488203 | 2.71925E-06 | 0.004503515 |
| 1656.199967 | 139.372022 | 3.14543E-06 | 0.005209465 |
| 1656.239967 | 143.115416 | 3.22992E-06 | 0.005349515 |
| 1656.279967 | 132.435556 | 2.98889E-06 | 0.004950432 |
| 1656.319967 | 135.152947 | 3.05021E-06 | 0.00505213  |
| 1656.359967 | 164.541702 | 3.71348E-06 | 0.006150855 |
| 1656.399967 | 155.768415 | 3.51548E-06 | 0.005823035 |
| 1656.439967 | 144.274276 | 3.25607E-06 | 0.005393484 |
| 1656.479967 | 147.637705 | 3.33198E-06 | 0.005519354 |
| 1656.519967 | 131.807007 | 2.9747E-06  | 0.004927651 |
| 1656.559967 | 104.707362 | 2.3631E-06  | 0.003914616 |
| 1656.599967 | 93.037316  | 2.09972E-06 | 0.0034784   |
| 1656.639967 | 117.299699 | 2.64729E-06 | 0.004385608 |
| 1656.679967 | 134.336294 | 3.03178E-06 | 0.005022694 |
| 1656.719967 | 126.51531  | 2.85527E-06 | 0.00473039  |
| 1656.759967 | 118.130329 | 2.66604E-06 | 0.004416983 |
| 1656.799967 | 112.871366 | 2.54735E-06 | 0.004220449 |
| 1656.839967 | 108.195183 | 2.44181E-06 | 0.004045696 |
| 1656.879967 | 114.733659 | 2.58938E-06 | 0.00429029  |
| 1656.919967 | 125.132316 | 2.82406E-06 | 0.004679245 |
| 1656.959967 | 140.637799 | 3.174E-06   | 0.00525919  |

|             |            |             |             |
|-------------|------------|-------------|-------------|
| 1656.999967 | 145.482247 | 3.28333E-06 | 0.00544048  |
| 1657.039967 | 134.73939  | 3.04088E-06 | 0.00503886  |
| 1657.079967 | 133.022674 | 3.00214E-06 | 0.00497478  |
| 1657.119967 | 145.055315 | 3.2737E-06  | 0.005424908 |
| 1657.159967 | 148.0746   | 3.34184E-06 | 0.005537959 |
| 1657.199967 | 148.848417 | 3.3593E-06  | 0.005567034 |
| 1657.239967 | 154.063656 | 3.477E-06   | 0.005762227 |
| 1657.279967 | 159.742597 | 3.60517E-06 | 0.005974773 |
| 1657.319967 | 162.397337 | 3.66508E-06 | 0.006074213 |
| 1657.359967 | 150.483045 | 3.39619E-06 | 0.005628714 |
| 1657.399967 | 133.44659  | 3.0117E-06  | 0.004991598 |
| 1657.439967 | 126.877266 | 2.86344E-06 | 0.004745985 |
| 1657.479967 | 118.069789 | 2.66467E-06 | 0.004416638 |
| 1657.519967 | 119.548426 | 2.69804E-06 | 0.004472058 |
| 1657.559967 | 108.949356 | 2.45884E-06 | 0.004075667 |
| 1657.599967 | 90.995875  | 2.05365E-06 | 0.00340413  |
| 1657.639967 | 90.349264  | 2.03906E-06 | 0.003380022 |
| 1657.679967 | 99.031696  | 2.23501E-06 | 0.003704927 |
| 1657.719967 | 105.711844 | 2.38577E-06 | 0.003954937 |
| 1657.759967 | 117.249275 | 2.64615E-06 | 0.004386686 |
| 1657.799967 | 121.949212 | 2.75222E-06 | 0.004562637 |
| 1657.839967 | 130.991952 | 2.95631E-06 | 0.004901082 |
| 1657.879967 | 154.016809 | 3.47594E-06 | 0.005762699 |
| 1657.919967 | 154.155418 | 3.47907E-06 | 0.005768025 |
| 1657.959967 | 145.628213 | 3.28663E-06 | 0.005449094 |
| 1657.999967 | 134.52763  | 3.0361E-06  | 0.005033856 |
| 1658.039967 | 115.719169 | 2.61162E-06 | 0.004330171 |
| 1658.079967 | 106.057293 | 2.39357E-06 | 0.003968723 |
| 1658.119967 | 106.965854 | 2.41407E-06 | 0.004002818 |
| 1658.159967 | 112.696881 | 2.54341E-06 | 0.004217383 |
| 1658.199967 | 121.65786  | 2.74565E-06 | 0.004552834 |
| 1658.239967 | 125.723368 | 2.8374E-06  | 0.004705092 |
| 1658.279967 | 135.285799 | 3.05321E-06 | 0.00506308  |
| 1658.319967 | 147.41918  | 3.32705E-06 | 0.005517306 |
| 1658.359967 | 160.70042  | 3.62678E-06 | 0.006014514 |
| 1658.399967 | 138.473761 | 3.12516E-06 | 0.005182765 |
| 1658.439967 | 111.586197 | 2.51835E-06 | 0.004176524 |
| 1658.479967 | 103.878603 | 2.3444E-06  | 0.003888133 |
| 1658.519967 | 96.762544  | 2.1838E-06  | 0.003621869 |
| 1658.559967 | 101.279702 | 2.28574E-06 | 0.00379104  |
| 1658.599967 | 113.197919 | 2.55472E-06 | 0.004237257 |
| 1658.639967 | 120.378692 | 2.71678E-06 | 0.004506159 |
| 1658.679967 | 123.438028 | 2.78582E-06 | 0.004620791 |
| 1658.719967 | 120.724439 | 2.72458E-06 | 0.004519319 |
| 1658.759967 | 114.615516 | 2.58671E-06 | 0.004290735 |
| 1658.799967 | 106.026419 | 2.39287E-06 | 0.00396929  |

|             |            |             |             |
|-------------|------------|-------------|-------------|
| 1658.839967 | 117.666916 | 2.65558E-06 | 0.00440518  |
| 1658.879967 | 129.582187 | 2.92449E-06 | 0.004851377 |
| 1658.919967 | 140.170841 | 3.16346E-06 | 0.005247928 |
| 1658.959967 | 143.754398 | 3.24434E-06 | 0.005382224 |
| 1658.999967 | 119.427581 | 2.69531E-06 | 0.004471526 |
| 1659.039967 | 112.695941 | 2.54339E-06 | 0.004219586 |
| 1659.079967 | 109.202702 | 2.46455E-06 | 0.00408889  |
| 1659.119967 | 110.065012 | 2.48401E-06 | 0.004121277 |
| 1659.159967 | 127.010432 | 2.86645E-06 | 0.004755897 |
| 1659.199967 | 151.592893 | 3.42124E-06 | 0.005676522 |
| 1659.239967 | 144.95029  | 3.27133E-06 | 0.005427915 |
| 1659.279967 | 134.879112 | 3.04403E-06 | 0.005050904 |
| 1659.319967 | 135.655638 | 3.06156E-06 | 0.005080106 |
| 1659.359967 | 149.168997 | 3.36654E-06 | 0.005586296 |
| 1659.399967 | 151.328611 | 3.41528E-06 | 0.005667309 |
| 1659.439967 | 139.806083 | 3.15523E-06 | 0.005235912 |
| 1659.479967 | 139.735611 | 3.15364E-06 | 0.005233399 |
| 1659.519967 | 125.222874 | 2.82611E-06 | 0.004689979 |
| 1659.559967 | 117.761155 | 2.65771E-06 | 0.004410621 |
| 1659.599967 | 119.765952 | 2.70295E-06 | 0.004485817 |
| 1659.639967 | 105.105698 | 2.37209E-06 | 0.003936814 |
| 1659.679967 | 95.623896  | 2.1581E-06  | 0.003581752 |
| 1659.719967 | 106.011205 | 2.39253E-06 | 0.003970922 |
| 1659.759967 | 111.991752 | 2.5275E-06  | 0.00419504  |
| 1659.799967 | 113.542529 | 2.5625E-06  | 0.004253232 |
| 1659.839967 | 105.666954 | 2.38476E-06 | 0.003958313 |
| 1659.879967 | 119.161915 | 2.68932E-06 | 0.004463946 |
| 1659.919967 | 134.506721 | 3.03563E-06 | 0.005038902 |
| 1659.959967 | 122.546988 | 2.76571E-06 | 0.004590976 |
| 1659.999967 | 113.99882  | 2.57279E-06 | 0.004270839 |
| 1660.039967 | 103.790318 | 2.3424E-06  | 0.003888482 |
| 1660.079967 | 101.544745 | 2.29172E-06 | 0.003804444 |
| 1660.119967 | 101.155625 | 2.28294E-06 | 0.003789957 |
| 1660.159967 | 114.446398 | 2.5829E-06  | 0.00428802  |
| 1660.199967 | 139.31968  | 3.14425E-06 | 0.005220086 |
| 1660.239967 | 144.585377 | 3.26309E-06 | 0.005417513 |
| 1660.279967 | 142.20254  | 3.20931E-06 | 0.005328359 |
| 1660.319967 | 142.583718 | 3.21792E-06 | 0.00534277  |
| 1660.359967 | 148.510881 | 3.35168E-06 | 0.005565001 |
| 1660.399967 | 153.704522 | 3.4689E-06  | 0.005759756 |
| 1660.439967 | 131.226824 | 2.96161E-06 | 0.00491757  |
| 1660.479967 | 123.693652 | 2.79159E-06 | 0.004635385 |
| 1660.519967 | 128.228396 | 2.89394E-06 | 0.004805439 |
| 1660.559967 | 128.023888 | 2.88932E-06 | 0.004797891 |
| 1660.599967 | 123.377156 | 2.78445E-06 | 0.004623859 |
| 1660.639967 | 120.380932 | 2.71683E-06 | 0.004511676 |

|             |            |             |             |
|-------------|------------|-------------|-------------|
| 1660.679967 | 119.575725 | 2.69866E-06 | 0.004481607 |
| 1660.719967 | 125.652653 | 2.83581E-06 | 0.004709479 |
| 1660.759967 | 120.504637 | 2.71962E-06 | 0.004516639 |
| 1660.799967 | 112.544691 | 2.53998E-06 | 0.004218394 |
| 1660.839967 | 112.289885 | 2.53423E-06 | 0.004208944 |
| 1660.879967 | 111.530274 | 2.51708E-06 | 0.004180573 |
| 1660.919967 | 94.977921  | 2.14352E-06 | 0.003560214 |
| 1660.959967 | 88.782838  | 2.0037E-06  | 0.003328074 |
| 1660.999967 | 102.430955 | 2.31172E-06 | 0.003839773 |
| 1661.039967 | 132.420084 | 2.98854E-06 | 0.004964079 |
| 1661.079967 | 140.473461 | 3.17029E-06 | 0.005266106 |
| 1661.119967 | 138.490157 | 3.12553E-06 | 0.00519188  |
| 1661.159967 | 164.895625 | 3.72146E-06 | 0.006181948 |
| 1661.199967 | 182.311168 | 4.11451E-06 | 0.006835022 |
| 1661.239967 | 181.306934 | 4.09184E-06 | 0.006797536 |
| 1661.279967 | 166.351502 | 3.75432E-06 | 0.006236979 |
| 1661.319967 | 158.074205 | 3.56751E-06 | 0.005926783 |
| 1661.359967 | 163.540144 | 3.69087E-06 | 0.006131869 |
| 1661.399967 | 180.195722 | 4.06677E-06 | 0.006756526 |
| 1661.439967 | 177.000853 | 3.99466E-06 | 0.006636892 |
| 1661.479967 | 160.360226 | 3.61911E-06 | 0.006013074 |
| 1661.519967 | 141.45753  | 3.1925E-06  | 0.005304402 |
| 1661.559967 | 139.711368 | 3.15309E-06 | 0.00523905  |
| 1661.599967 | 151.204997 | 3.41249E-06 | 0.005670187 |
| 1661.639967 | 146.53008  | 3.30698E-06 | 0.00549501  |
| 1661.679967 | 136.362816 | 3.07752E-06 | 0.005113851 |
| 1661.719967 | 139.862954 | 3.15651E-06 | 0.005245239 |
| 1661.759967 | 132.245014 | 2.98459E-06 | 0.004959665 |
| 1661.799967 | 116.636658 | 2.63233E-06 | 0.004374401 |
| 1661.839967 | 125.556422 | 2.83363E-06 | 0.004709046 |
| 1661.879967 | 149.352478 | 3.37068E-06 | 0.005601661 |
| 1661.919967 | 140.906177 | 3.18006E-06 | 0.005284999 |
| 1661.959967 | 115.259635 | 2.60125E-06 | 0.004323172 |
| 1661.999967 | 123.495559 | 2.78712E-06 | 0.004632198 |
| 1662.039967 | 142.957179 | 3.22634E-06 | 0.005362313 |
| 1662.079967 | 144.837812 | 3.26879E-06 | 0.005432987 |
| 1662.119967 | 127.556965 | 2.87878E-06 | 0.004784883 |
| 1662.159967 | 122.708658 | 2.76936E-06 | 0.004603125 |
| 1662.199967 | 131.62625  | 2.97062E-06 | 0.004937766 |
| 1662.239967 | 140.720811 | 3.17587E-06 | 0.005279063 |
| 1662.279967 | 142.929095 | 3.22571E-06 | 0.005362034 |
| 1662.319967 | 147.787806 | 3.33536E-06 | 0.005544444 |
| 1662.359967 | 150.909019 | 3.40581E-06 | 0.005661676 |
| 1662.399967 | 156.771958 | 3.53812E-06 | 0.005881778 |
| 1662.439967 | 157.523157 | 3.55508E-06 | 0.005910104 |
| 1662.479967 | 154.27938  | 3.48187E-06 | 0.00578854  |

|             |            |             |             |
|-------------|------------|-------------|-------------|
| 1662.519967 | 137.994796 | 3.11435E-06 | 0.00517767  |
| 1662.559967 | 134.836237 | 3.04307E-06 | 0.00505928  |
| 1662.599967 | 141.629364 | 3.19638E-06 | 0.005314297 |
| 1662.639967 | 139.482043 | 3.14792E-06 | 0.00523385  |
| 1662.679967 | 151.377459 | 3.41638E-06 | 0.005680344 |
| 1662.719967 | 151.905568 | 3.4283E-06  | 0.005700298 |
| 1662.759967 | 132.116177 | 2.98168E-06 | 0.004957815 |
| 1662.799967 | 147.97319  | 3.33955E-06 | 0.005553002 |
| 1662.839967 | 136.766475 | 3.08663E-06 | 0.00513257  |
| 1662.879967 | 123.028012 | 2.77657E-06 | 0.004617104 |
| 1662.919967 | 143.337666 | 3.23493E-06 | 0.005379432 |
| 1662.959967 | 142.66117  | 3.21966E-06 | 0.005354172 |
| 1662.999967 | 117.645454 | 2.65509E-06 | 0.004415421 |
| 1663.039967 | 106.519526 | 2.404E-06   | 0.003997944 |
| 1663.079967 | 110.812576 | 2.50089E-06 | 0.004159173 |
| 1663.119967 | 129.255209 | 2.91711E-06 | 0.004851504 |
| 1663.159967 | 144.375111 | 3.25835E-06 | 0.005419149 |
| 1663.199967 | 162.909044 | 3.67663E-06 | 0.006114971 |
| 1663.239967 | 176.504252 | 3.98346E-06 | 0.006625442 |
| 1663.279967 | 177.859675 | 4.01405E-06 | 0.006676481 |
| 1663.319967 | 158.693063 | 3.58148E-06 | 0.00595715  |
| 1663.359967 | 155.972682 | 3.52009E-06 | 0.00585517  |
| 1663.399967 | 144.490185 | 3.26094E-06 | 0.005424251 |
| 1663.439967 | 134.4139   | 3.03353E-06 | 0.005046103 |
| 1663.479967 | 129.564249 | 2.92408E-06 | 0.004864156 |
| 1663.519967 | 124.537341 | 2.81063E-06 | 0.004675546 |
| 1663.559967 | 114.262079 | 2.57874E-06 | 0.004289882 |
| 1663.599967 | 97.359094  | 2.19726E-06 | 0.00365536  |
| 1663.639967 | 97.916063  | 2.20983E-06 | 0.00367636  |
| 1663.679967 | 95.952698  | 2.16552E-06 | 0.00360273  |
| 1663.719967 | 96.848215  | 2.18573E-06 | 0.003636442 |
| 1663.759967 | 122.828172 | 2.77206E-06 | 0.004612044 |
| 1663.799967 | 137.778468 | 3.10947E-06 | 0.005173533 |
| 1663.839967 | 126.551966 | 2.8561E-06  | 0.004752096 |
| 1663.879967 | 138.355117 | 3.12248E-06 | 0.005195436 |
| 1663.919967 | 155.078922 | 3.49992E-06 | 0.005823579 |
| 1663.959967 | 144.347172 | 3.25771E-06 | 0.005420707 |
| 1663.999967 | 132.771595 | 2.99647E-06 | 0.004986126 |
| 1664.039967 | 119.580175 | 2.69876E-06 | 0.004490841 |
| 1664.079967 | 113.757524 | 2.56735E-06 | 0.004272274 |
| 1664.119967 | 109.207774 | 2.46467E-06 | 0.004101502 |
| 1664.159967 | 106.317858 | 2.39945E-06 | 0.003993062 |
| 1664.199967 | 104.397568 | 2.35611E-06 | 0.003921034 |
| 1664.239967 | 120.321174 | 2.71548E-06 | 0.004519213 |
| 1664.279967 | 150.503611 | 3.39666E-06 | 0.005652988 |
| 1664.319967 | 168.817885 | 3.80998E-06 | 0.006341033 |



|             |            |             |             |
|-------------|------------|-------------|-------------|
| 1664.359967 | 177.056216 | 3.99591E-06 | 0.006650636 |
| 1664.399967 | 168.334247 | 3.79907E-06 | 0.006323171 |
| 1664.439967 | 150.226168 | 3.3904E-06  | 0.00564311  |
| 1664.479967 | 151.466978 | 3.4184E-06  | 0.005689856 |
| 1664.519967 | 153.760333 | 3.47016E-06 | 0.005776145 |
| 1664.559967 | 132.415796 | 2.98844E-06 | 0.004974438 |
| 1664.599967 | 115.79051  | 2.61323E-06 | 0.004349983 |
| 1664.639967 | 106.952032 | 2.41376E-06 | 0.004018039 |
| 1664.679967 | 92.174878  | 2.08026E-06 | 0.003462965 |
| 1664.719967 | 90.605406  | 2.04484E-06 | 0.003404082 |
| 1664.759967 | 104.034149 | 2.34791E-06 | 0.0039087   |
| 1664.799967 | 124.053042 | 2.7997E-06  | 0.004660948 |
| 1664.839967 | 116.143258 | 2.62119E-06 | 0.004363864 |
| 1664.879967 | 99.747941  | 2.25117E-06 | 0.003747931 |
| 1664.919967 | 100.997466 | 2.27937E-06 | 0.003794972 |
| 1664.959967 | 104.752267 | 2.36411E-06 | 0.003936153 |
| 1664.999967 | 107.768921 | 2.43219E-06 | 0.004049604 |
| 1665.039967 | 117.71021  | 2.65656E-06 | 0.004423271 |
| 1665.079967 | 133.492169 | 3.01273E-06 | 0.00501644  |
| 1665.119967 | 129.069982 | 2.91293E-06 | 0.004850377 |
| 1665.159967 | 129.743358 | 2.92813E-06 | 0.0048758   |
| 1665.199967 | 150.329172 | 3.39272E-06 | 0.005649557 |
| 1665.239967 | 151.772682 | 3.4253E-06  | 0.005703943 |
| 1665.279967 | 130.98592  | 2.95617E-06 | 0.00492285  |
| 1665.319967 | 111.587605 | 2.51838E-06 | 0.004193903 |
| 1665.359967 | 118.654024 | 2.67786E-06 | 0.004459594 |
| 1665.399967 | 130.020858 | 2.93439E-06 | 0.004886932 |
| 1665.439967 | 130.290534 | 2.94048E-06 | 0.004897186 |
| 1665.479967 | 123.062708 | 2.77735E-06 | 0.004625627 |
| 1665.519967 | 118.852217 | 2.68233E-06 | 0.004467472 |
| 1665.559967 | 104.802515 | 2.36525E-06 | 0.00393946  |
| 1665.599967 | 92.298552  | 2.08305E-06 | 0.003469528 |
| 1665.639967 | 84.888629  | 1.91582E-06 | 0.003191063 |
| 1665.679967 | 92.761421  | 2.0935E-06  | 0.003487094 |
| 1665.719967 | 108.983359 | 2.4596E-06  | 0.004097009 |
| 1665.759967 | 130.522765 | 2.94572E-06 | 0.004906857 |
| 1665.799967 | 157.515859 | 3.55491E-06 | 0.005921775 |
| 1665.839967 | 170.830299 | 3.8554E-06  | 0.006422483 |
| 1665.879967 | 154.892465 | 3.49571E-06 | 0.005823429 |
| 1665.919967 | 135.33093  | 3.05423E-06 | 0.005088104 |
| 1665.959967 | 115.922208 | 2.6162E-06  | 0.004358489 |
| 1665.999967 | 120.03043  | 2.70892E-06 | 0.00451306  |
| 1666.039967 | 135.745008 | 3.06358E-06 | 0.00510404  |
| 1666.079967 | 142.512035 | 3.2163E-06  | 0.00535861  |
| 1666.119967 | 153.343257 | 3.46074E-06 | 0.005766014 |
| 1666.159967 | 143.605325 | 3.24097E-06 | 0.005399978 |

|             |            |             |             |
|-------------|------------|-------------|-------------|
| 1666.199967 | 134.738259 | 3.04085E-06 | 0.005066672 |
| 1666.239967 | 131.931325 | 2.97751E-06 | 0.00496124  |
| 1666.279967 | 135.28737  | 3.05325E-06 | 0.005087565 |
| 1666.319967 | 139.202762 | 3.14161E-06 | 0.005234932 |
| 1666.359967 | 127.723956 | 2.88255E-06 | 0.004803369 |
| 1666.399967 | 131.009685 | 2.95671E-06 | 0.004927055 |
| 1666.439967 | 149.069545 | 3.36429E-06 | 0.005606391 |
| 1666.479967 | 146.073867 | 3.29668E-06 | 0.005493857 |
| 1666.519967 | 127.362186 | 2.87439E-06 | 0.004790224 |
| 1666.559967 | 115.230518 | 2.60059E-06 | 0.004334043 |
| 1666.599967 | 104.590332 | 2.36046E-06 | 0.003933939 |
| 1666.639967 | 92.985255  | 2.09855E-06 | 0.003497523 |
| 1666.679967 | 85.675911  | 1.93359E-06 | 0.003222669 |
| 1666.719967 | 90.742014  | 2.04792E-06 | 0.003413311 |
| 1666.759967 | 111.533106 | 2.51715E-06 | 0.00419548  |
| 1666.799967 | 117.205477 | 2.64516E-06 | 0.00440896  |
| 1666.839967 | 93.120833  | 2.10161E-06 | 0.003503043 |
| 1666.879967 | 75.765635  | 1.70992E-06 | 0.002850239 |
| 1666.919967 | 83.717258  | 1.88938E-06 | 0.003149448 |
| 1666.959967 | 107.175749 | 2.41881E-06 | 0.004032055 |
| 1666.999967 | 122.755579 | 2.77042E-06 | 0.004618294 |
| 1667.039967 | 110.539115 | 2.49471E-06 | 0.004158788 |
| 1667.079967 | 99.625872  | 2.24842E-06 | 0.003748291 |
| 1667.119967 | 98.093789  | 2.21384E-06 | 0.003690737 |
| 1667.159967 | 102.829982 | 2.32073E-06 | 0.003869027 |
| 1667.199967 | 127.745348 | 2.88303E-06 | 0.004806595 |
| 1667.239967 | 136.047014 | 3.07039E-06 | 0.00511908  |
| 1667.279967 | 135.663857 | 3.06174E-06 | 0.005104785 |
| 1667.319967 | 141.939094 | 3.20337E-06 | 0.005341039 |
| 1667.359967 | 135.911484 | 3.06733E-06 | 0.005114348 |
| 1667.399967 | 125.313557 | 2.82815E-06 | 0.004715661 |
| 1667.439967 | 115.03562  | 2.59619E-06 | 0.004328997 |
| 1667.479967 | 119.652136 | 2.70038E-06 | 0.004502833 |
| 1667.519967 | 132.273514 | 2.98523E-06 | 0.004977929 |
| 1667.559967 | 119.661345 | 2.70059E-06 | 0.004503396 |
| 1667.599967 | 107.733694 | 2.4314E-06  | 0.004054602 |
| 1667.639967 | 108.674963 | 2.45264E-06 | 0.004090125 |
| 1667.679967 | 109.495474 | 2.47116E-06 | 0.004121105 |
| 1667.719967 | 123.648732 | 2.79058E-06 | 0.004653905 |
| 1667.759967 | 133.252652 | 3.00733E-06 | 0.005015499 |
| 1667.799967 | 131.657268 | 2.97132E-06 | 0.004955569 |
| 1667.839967 | 120.387047 | 2.71697E-06 | 0.004531468 |
| 1667.879967 | 110.326469 | 2.48991E-06 | 0.004152879 |
| 1667.919967 | 118.587816 | 2.67636E-06 | 0.004463957 |
| 1667.959967 | 126.026194 | 2.84424E-06 | 0.004744071 |
| 1667.999967 | 119.63936  | 2.70009E-06 | 0.004503756 |

|             |            |             |             |
|-------------|------------|-------------|-------------|
| 1668.039967 | 128.749258 | 2.90569E-06 | 0.004846809 |
| 1668.079967 | 135.175917 | 3.05073E-06 | 0.005088865 |
| 1668.119967 | 130.57154  | 2.94682E-06 | 0.004915646 |
| 1668.159967 | 133.95073  | 3.02308E-06 | 0.005042983 |
| 1668.199967 | 128.850029 | 2.90797E-06 | 0.004851068 |
| 1668.239967 | 125.224183 | 2.82614E-06 | 0.004714672 |
| 1668.279967 | 124.411006 | 2.80778E-06 | 0.004684168 |
| 1668.319967 | 131.8045   | 2.97464E-06 | 0.004962658 |
| 1668.359967 | 141.698184 | 3.19793E-06 | 0.005335299 |
| 1668.399967 | 144.205153 | 3.25451E-06 | 0.005429823 |
| 1668.439967 | 143.814482 | 3.24569E-06 | 0.005415243 |
| 1668.479967 | 133.039    | 3.0025E-06  | 0.005009619 |
| 1668.519967 | 127.484971 | 2.87716E-06 | 0.004800596 |
| 1668.559967 | 127.199473 | 2.87071E-06 | 0.00478996  |
| 1668.599967 | 117.368361 | 2.64884E-06 | 0.004419855 |
| 1668.639967 | 110.372799 | 2.49096E-06 | 0.004156516 |
| 1668.679967 | 124.102882 | 2.80083E-06 | 0.004673688 |
| 1668.719967 | 138.657083 | 3.1293E-06  | 0.005221921 |
| 1668.759967 | 135.08243  | 3.04862E-06 | 0.005087419 |
| 1668.799967 | 135.02467  | 3.04732E-06 | 0.005085365 |
| 1668.839967 | 135.218446 | 3.05169E-06 | 0.005092786 |
| 1668.879967 | 106.776467 | 2.4098E-06  | 0.00402166  |
| 1668.919967 | 87.043077  | 1.96444E-06 | 0.003278495 |
| 1668.959967 | 90.479416  | 2.04199E-06 | 0.003408007 |
| 1668.999967 | 110.693409 | 2.4982E-06  | 0.004169489 |
| 1669.039967 | 121.679351 | 2.74613E-06 | 0.004583407 |
| 1669.079967 | 132.217049 | 2.98395E-06 | 0.004980459 |
| 1669.119967 | 132.604334 | 2.9927E-06  | 0.004995167 |
| 1669.159967 | 113.924886 | 2.57113E-06 | 0.004291621 |
| 1669.199967 | 105.976226 | 2.39174E-06 | 0.003992285 |
| 1669.239967 | 127.586646 | 2.87945E-06 | 0.004806498 |
| 1669.279967 | 163.980604 | 3.70081E-06 | 0.006177694 |
| 1669.319967 | 173.334502 | 3.91192E-06 | 0.006530243 |
| 1669.359967 | 161.696871 | 3.64927E-06 | 0.006091951 |
| 1669.399967 | 146.57288  | 3.30795E-06 | 0.005522285 |
| 1669.439967 | 121.146577 | 2.73411E-06 | 0.004564432 |
| 1669.479967 | 106.814642 | 2.41066E-06 | 0.004024545 |
| 1669.519967 | 124.900007 | 2.81882E-06 | 0.004706075 |
| 1669.559967 | 128.544039 | 2.90106E-06 | 0.004843493 |
| 1669.599967 | 115.308302 | 2.60235E-06 | 0.00434488  |
| 1669.639967 | 103.556363 | 2.33712E-06 | 0.003902154 |
| 1669.679967 | 87.242477  | 1.96894E-06 | 0.003287502 |
| 1669.719967 | 85.621787  | 1.93236E-06 | 0.003226508 |
| 1669.759967 | 103.353156 | 2.33254E-06 | 0.003894777 |
| 1669.799967 | 117.364706 | 2.64876E-06 | 0.004422896 |
| 1669.839967 | 101.618492 | 2.29339E-06 | 0.003829591 |

|             |            |             |             |
|-------------|------------|-------------|-------------|
| 1669.879967 | 92.902543  | 2.09668E-06 | 0.003501206 |
| 1669.919967 | 109.184598 | 2.46414E-06 | 0.004114924 |
| 1669.959967 | 112.243105 | 2.53317E-06 | 0.004230293 |
| 1669.999967 | 101.14635  | 2.28273E-06 | 0.003812163 |
| 1670.039967 | 99.942778  | 2.25557E-06 | 0.003766891 |
| 1670.079967 | 107.220805 | 2.41982E-06 | 0.0040413   |
| 1670.119967 | 134.644792 | 3.03875E-06 | 0.005075069 |
| 1670.159967 | 151.349765 | 3.41575E-06 | 0.005704855 |
| 1670.199967 | 162.276947 | 3.66236E-06 | 0.006116881 |
| 1670.239967 | 159.562022 | 3.60109E-06 | 0.006014689 |
| 1670.279967 | 149.644753 | 3.37727E-06 | 0.005640992 |
| 1670.319967 | 150.822578 | 3.40386E-06 | 0.005685528 |
| 1670.359967 | 148.720657 | 3.35642E-06 | 0.005606426 |
| 1670.399967 | 127.24665  | 2.87178E-06 | 0.004797021 |
| 1670.439967 | 107.756631 | 2.43192E-06 | 0.004062371 |
| 1670.479967 | 95.648659  | 2.15866E-06 | 0.003605993 |
| 1670.519967 | 90.050702  | 2.03232E-06 | 0.003395029 |
| 1670.559967 | 94.55421   | 2.13396E-06 | 0.003564903 |
| 1670.599967 | 94.484938  | 2.13239E-06 | 0.003562376 |
| 1670.639967 | 93.681337  | 2.11426E-06 | 0.003532163 |
| 1670.679967 | 97.040203  | 2.19006E-06 | 0.003658893 |
| 1670.719967 | 118.746233 | 2.67994E-06 | 0.004477424 |
| 1670.759967 | 131.435502 | 2.96632E-06 | 0.004956002 |
| 1670.799967 | 124.122207 | 2.80127E-06 | 0.004680354 |
| 1670.839967 | 117.251242 | 2.6462E-06  | 0.004421372 |
| 1670.879967 | 125.789574 | 2.8389E-06  | 0.004743454 |
| 1670.919967 | 114.31674  | 2.57997E-06 | 0.004310923 |
| 1670.959967 | 113.493733 | 2.5614E-06  | 0.004279989 |
| 1670.999967 | 127.783711 | 2.8839E-06  | 0.004818997 |
| 1671.039967 | 126.086791 | 2.8456E-06  | 0.004755117 |
| 1671.079967 | 104.039189 | 2.34802E-06 | 0.003923728 |
| 1671.119967 | 100.667676 | 2.27193E-06 | 0.003796666 |
| 1671.159967 | 129.353894 | 2.91934E-06 | 0.004878679 |
| 1671.199967 | 143.809096 | 3.24557E-06 | 0.005423998 |
| 1671.239967 | 151.14402  | 3.41111E-06 | 0.005700783 |
| 1671.279967 | 160.141406 | 3.61417E-06 | 0.006040287 |
| 1671.319967 | 169.099242 | 3.81633E-06 | 0.006378316 |
| 1671.359967 | 164.687833 | 3.71677E-06 | 0.006212069 |
| 1671.399967 | 149.725561 | 3.3791E-06  | 0.005647823 |
| 1671.439967 | 125.587118 | 2.83433E-06 | 0.004737406 |
| 1671.479967 | 108.890826 | 2.45751E-06 | 0.004107686 |
| 1671.519967 | 95.70377   | 2.1599E-06  | 0.003610317 |
| 1671.559967 | 106.610252 | 2.40604E-06 | 0.004021848 |
| 1671.599967 | 110.165354 | 2.48628E-06 | 0.004156063 |
| 1671.639967 | 98.484367  | 2.22265E-06 | 0.003715479 |
| 1671.679967 | 101.901498 | 2.29977E-06 | 0.003844488 |

|             |            |             |             |
|-------------|------------|-------------|-------------|
| 1671.719967 | 114.377387 | 2.58134E-06 | 0.004315275 |
| 1671.759967 | 117.079867 | 2.64233E-06 | 0.004417341 |
| 1671.799967 | 121.670471 | 2.74593E-06 | 0.004590651 |
| 1671.839967 | 148.045369 | 3.34118E-06 | 0.005585915 |
| 1671.879967 | 156.935466 | 3.54181E-06 | 0.005921489 |
| 1671.919967 | 118.996281 | 2.68558E-06 | 0.004490075 |
| 1671.959967 | 114.826202 | 2.59147E-06 | 0.00433283  |
| 1671.999967 | 143.455651 | 3.23759E-06 | 0.005413257 |
| 1672.039967 | 154.124416 | 3.47837E-06 | 0.005815979 |
| 1672.079967 | 146.38203  | 3.30364E-06 | 0.005523948 |
| 1672.119967 | 126.796989 | 2.86163E-06 | 0.004784991 |
| 1672.159967 | 105.640389 | 2.38416E-06 | 0.003986691 |
| 1672.199967 | 104.430193 | 2.35684E-06 | 0.003941114 |
| 1672.239967 | 122.583654 | 2.76654E-06 | 0.004626323 |
| 1672.279967 | 139.755138 | 3.15408E-06 | 0.005274503 |
| 1672.319967 | 139.320488 | 3.14427E-06 | 0.005258224 |
| 1672.359967 | 142.188489 | 3.209E-06   | 0.005366597 |
| 1672.399967 | 148.195111 | 3.34456E-06 | 0.005593437 |
| 1672.439967 | 151.847203 | 3.42698E-06 | 0.005731418 |
| 1672.479967 | 152.962244 | 3.45214E-06 | 0.005773643 |
| 1672.519967 | 140.648893 | 3.17425E-06 | 0.005308996 |
| 1672.559967 | 132.770078 | 2.99644E-06 | 0.005011718 |
| 1672.599967 | 124.437123 | 2.80837E-06 | 0.004697284 |
| 1672.639967 | 113.25539  | 2.55602E-06 | 0.004275295 |
| 1672.679967 | 104.056914 | 2.34842E-06 | 0.003928154 |
| 1672.719967 | 111.21618  | 2.50999E-06 | 0.004198518 |
| 1672.759967 | 109.006485 | 2.46012E-06 | 0.004115198 |
| 1672.799967 | 108.563863 | 2.45014E-06 | 0.004098586 |
| 1672.839967 | 100.70518  | 2.27278E-06 | 0.00380199  |
| 1672.879967 | 93.846983  | 2.118E-06   | 0.003543153 |
| 1672.919967 | 106.88313  | 2.4122E-06  | 0.004035423 |
| 1672.959967 | 116.280388 | 2.62429E-06 | 0.004390326 |
| 1672.999967 | 110.946576 | 2.50391E-06 | 0.004189041 |
| 1673.039967 | 121.261475 | 2.7367E-06  | 0.004578613 |
| 1673.079967 | 131.314673 | 2.96359E-06 | 0.004958322 |
| 1673.119967 | 150.861615 | 3.40474E-06 | 0.005696533 |
| 1673.159967 | 174.562178 | 3.93963E-06 | 0.006591623 |
| 1673.199967 | 158.208125 | 3.57054E-06 | 0.005974222 |
| 1673.239967 | 138.510342 | 3.12599E-06 | 0.005230524 |
| 1673.279967 | 134.984695 | 3.04642E-06 | 0.005097508 |
| 1673.319967 | 133.994123 | 3.02406E-06 | 0.005060221 |
| 1673.359967 | 136.272062 | 3.07547E-06 | 0.005146369 |
| 1673.399967 | 134.2797   | 3.03051E-06 | 0.005071248 |
| 1673.439967 | 123.539461 | 2.78811E-06 | 0.004665741 |
| 1673.479967 | 125.300667 | 2.82786E-06 | 0.00473237  |
| 1673.519967 | 140.709493 | 3.17562E-06 | 0.005314459 |

|             |            |             |             |
|-------------|------------|-------------|-------------|
| 1673.559967 | 155.18404  | 3.50229E-06 | 0.005861288 |
| 1673.599967 | 145.62712  | 3.2866E-06  | 0.005500456 |
| 1673.639967 | 113.259758 | 2.55611E-06 | 0.004278016 |
| 1673.679967 | 106.859727 | 2.41168E-06 | 0.004036372 |
| 1673.719967 | 124.348208 | 2.80637E-06 | 0.004697071 |
| 1673.759967 | 134.02136  | 3.02468E-06 | 0.005062581 |
| 1673.799967 | 134.104093 | 3.02654E-06 | 0.005065827 |
| 1673.839967 | 121.93628  | 2.75193E-06 | 0.004606294 |
| 1673.879967 | 113.393668 | 2.55914E-06 | 0.004283688 |
| 1673.919967 | 108.556591 | 2.44997E-06 | 0.004101055 |
| 1673.959967 | 109.806179 | 2.47817E-06 | 0.004148362 |
| 1673.999967 | 109.313853 | 2.46706E-06 | 0.004129861 |
| 1674.039967 | 105.177137 | 2.3737E-06  | 0.003973671 |
| 1674.079967 | 105.419807 | 2.37918E-06 | 0.003982935 |
| 1674.119967 | 118.87555  | 2.68286E-06 | 0.004491422 |
| 1674.159967 | 129.814825 | 2.92974E-06 | 0.004904853 |
| 1674.199967 | 144.571883 | 3.26279E-06 | 0.005462556 |
| 1674.239967 | 134.08922  | 3.02621E-06 | 0.005066597 |
| 1674.279967 | 129.732844 | 2.92789E-06 | 0.004902107 |
| 1674.319967 | 157.075021 | 3.54496E-06 | 0.005935405 |
| 1674.359967 | 164.585494 | 3.71447E-06 | 0.006219352 |
| 1674.399967 | 140.135647 | 3.16267E-06 | 0.005295568 |
| 1674.439967 | 109.677174 | 2.47526E-06 | 0.004144676 |
| 1674.479967 | 103.734439 | 2.34114E-06 | 0.003920195 |
| 1674.519967 | 112.2084   | 2.53239E-06 | 0.004240533 |
| 1674.559967 | 107.753489 | 2.43185E-06 | 0.004072272 |
| 1674.599967 | 101.817947 | 2.29789E-06 | 0.003848045 |
| 1674.639967 | 104.995346 | 2.3696E-06  | 0.003968225 |
| 1674.679967 | 114.079209 | 2.57461E-06 | 0.004311646 |
| 1674.719967 | 114.858172 | 2.59219E-06 | 0.004341191 |
| 1674.759967 | 110.901437 | 2.50289E-06 | 0.004191742 |
| 1674.799967 | 118.207878 | 2.66779E-06 | 0.00446801  |
| 1674.839967 | 135.333761 | 3.05429E-06 | 0.005115454 |
| 1674.879967 | 159.242396 | 3.59388E-06 | 0.006019316 |
| 1674.919967 | 148.699579 | 3.35594E-06 | 0.005620935 |
| 1674.959967 | 116.872246 | 2.63764E-06 | 0.004417948 |
| 1674.999967 | 114.919265 | 2.59357E-06 | 0.004344226 |
| 1675.039967 | 126.809557 | 2.86192E-06 | 0.004793822 |
| 1675.079967 | 123.945916 | 2.79729E-06 | 0.004685679 |
| 1675.119967 | 113.54243  | 2.56249E-06 | 0.004292486 |
| 1675.159967 | 107.441777 | 2.42481E-06 | 0.004061947 |
| 1675.199967 | 109.366893 | 2.46826E-06 | 0.004134826 |
| 1675.239967 | 103.931503 | 2.34559E-06 | 0.003929425 |
| 1675.279967 | 101.799767 | 2.29748E-06 | 0.00384892  |
| 1675.319967 | 116.893969 | 2.63813E-06 | 0.004419719 |
| 1675.359967 | 126.376042 | 2.85213E-06 | 0.004778347 |

|             |            |             |             |
|-------------|------------|-------------|-------------|
| 1675.399967 | 135.07609  | 3.04848E-06 | 0.005107422 |
| 1675.439967 | 141.813877 | 3.20054E-06 | 0.005362315 |
| 1675.479967 | 137.824895 | 3.11052E-06 | 0.005211607 |
| 1675.519967 | 126.403886 | 2.85276E-06 | 0.004779856 |
| 1675.559967 | 108.185894 | 2.4416E-06  | 0.004091055 |
| 1675.599967 | 96.511955  | 2.17814E-06 | 0.003649692 |
| 1675.639967 | 111.883021 | 2.52504E-06 | 0.004231065 |
| 1675.679967 | 105.235801 | 2.37503E-06 | 0.003979783 |
| 1675.719967 | 93.193919  | 2.10326E-06 | 0.00352447  |
| 1675.759967 | 96.732567  | 2.18312E-06 | 0.003658384 |
| 1675.799967 | 97.392152  | 2.19801E-06 | 0.003683417 |
| 1675.839967 | 97.923219  | 2.20999E-06 | 0.003703591 |
| 1675.879967 | 95.66082   | 2.15893E-06 | 0.00361811  |
| 1675.919967 | 114.372095 | 2.58122E-06 | 0.004325916 |
| 1675.959967 | 154.057465 | 3.47686E-06 | 0.005827082 |
| 1675.999967 | 141.469643 | 3.19277E-06 | 0.005351087 |
| 1676.039967 | 114.643586 | 2.58735E-06 | 0.004336495 |
| 1676.079967 | 111.647166 | 2.51972E-06 | 0.004223254 |
| 1676.119967 | 120.807126 | 2.72645E-06 | 0.004569855 |
| 1676.159967 | 118.877106 | 2.68289E-06 | 0.004496954 |
| 1676.199967 | 125.684827 | 2.83653E-06 | 0.004754594 |
| 1676.239967 | 148.343434 | 3.3479E-06  | 0.005611892 |
| 1676.279967 | 150.031818 | 3.38601E-06 | 0.005675899 |
| 1676.319967 | 139.121534 | 3.13978E-06 | 0.005263275 |
| 1676.359967 | 142.759468 | 3.22188E-06 | 0.005401035 |
| 1676.399967 | 133.479717 | 3.01245E-06 | 0.005050073 |
| 1676.439967 | 110.835763 | 2.50141E-06 | 0.004193462 |
| 1676.479967 | 88.521254  | 1.9978E-06  | 0.003349274 |
| 1676.519967 | 99.714071  | 2.25041E-06 | 0.003772853 |
| 1676.559967 | 111.08408  | 2.50701E-06 | 0.004203158 |
| 1676.599967 | 97.493218  | 2.20029E-06 | 0.003689    |
| 1676.639967 | 96.051725  | 2.16775E-06 | 0.003634542 |
| 1676.679967 | 102.227961 | 2.30714E-06 | 0.00386834  |
| 1676.719967 | 118.208544 | 2.6678E-06  | 0.004473157 |
| 1676.759967 | 129.844669 | 2.93041E-06 | 0.0049136   |
| 1676.799967 | 130.69347  | 2.94957E-06 | 0.004945838 |
| 1676.839967 | 144.952844 | 3.27138E-06 | 0.005485587 |
| 1676.879967 | 129.831257 | 2.93011E-06 | 0.004913444 |
| 1676.919967 | 114.466905 | 2.58336E-06 | 0.004332086 |
| 1676.959967 | 124.999817 | 2.82107E-06 | 0.004730824 |
| 1676.999967 | 136.840392 | 3.0883E-06  | 0.005179074 |
| 1677.039967 | 130.095667 | 2.93608E-06 | 0.00492392  |
| 1677.079967 | 113.865615 | 2.56979E-06 | 0.004309741 |
| 1677.119967 | 104.365356 | 2.35538E-06 | 0.003950256 |
| 1677.159967 | 100.036541 | 2.25769E-06 | 0.0037865   |
| 1677.199967 | 110.018537 | 2.48297E-06 | 0.004164429 |

|             |            |             |             |
|-------------|------------|-------------|-------------|
| 1677.239967 | 146.781793 | 3.31266E-06 | 0.005556127 |
| 1677.279967 | 170.53967  | 3.84884E-06 | 0.006455587 |
| 1677.319967 | 159.48552  | 3.59937E-06 | 0.006037289 |
| 1677.359967 | 153.435454 | 3.46282E-06 | 0.005808403 |
| 1677.399967 | 149.391605 | 3.37156E-06 | 0.005655455 |
| 1677.439967 | 150.264171 | 3.39125E-06 | 0.005688623 |
| 1677.479967 | 144.179471 | 3.25393E-06 | 0.005458402 |
| 1677.519967 | 135.752233 | 3.06374E-06 | 0.005139483 |
| 1677.559967 | 127.624173 | 2.8803E-06  | 0.004831876 |
| 1677.599967 | 115.526071 | 2.60726E-06 | 0.004373943 |
| 1677.639967 | 113.227176 | 2.55538E-06 | 0.004287007 |
| 1677.679967 | 105.287771 | 2.3762E-06  | 0.0039865   |
| 1677.719967 | 98.704212  | 2.22762E-06 | 0.003737317 |
| 1677.759967 | 106.334905 | 2.39983E-06 | 0.00402634  |
| 1677.799967 | 111.312063 | 2.51216E-06 | 0.004214899 |
| 1677.839967 | 134.978181 | 3.04627E-06 | 0.005111153 |
| 1677.879967 | 151.393225 | 3.41673E-06 | 0.00573287  |
| 1677.919967 | 142.555492 | 3.21728E-06 | 0.005398336 |
| 1677.959967 | 121.21978  | 2.73576E-06 | 0.004590498 |
| 1677.999967 | 107.295387 | 2.42151E-06 | 0.004063289 |
| 1678.039967 | 102.818776 | 2.32048E-06 | 0.003893852 |
| 1678.079967 | 89.826098  | 2.02725E-06 | 0.003401887 |
| 1678.119967 | 86.702655  | 1.95676E-06 | 0.003283675 |
| 1678.159967 | 98.003419  | 2.2118E-06  | 0.003711755 |
| 1678.199967 | 102.316209 | 2.30913E-06 | 0.003875189 |
| 1678.239967 | 125.541947 | 2.83331E-06 | 0.004754969 |
| 1678.279967 | 149.64032  | 3.37717E-06 | 0.005667843 |
| 1678.319967 | 153.027201 | 3.45361E-06 | 0.005796264 |
| 1678.359967 | 158.853675 | 3.58511E-06 | 0.006017099 |
| 1678.399967 | 162.776894 | 3.67365E-06 | 0.00616585  |
| 1678.439967 | 146.242181 | 3.30048E-06 | 0.005539661 |
| 1678.479967 | 131.694187 | 2.97215E-06 | 0.004988702 |
| 1678.519967 | 131.615239 | 2.97037E-06 | 0.00498583  |
| 1678.559967 | 137.047699 | 3.09298E-06 | 0.005191745 |
| 1678.599967 | 119.116067 | 2.68828E-06 | 0.004512553 |
| 1678.639967 | 108.865105 | 2.45693E-06 | 0.004124307 |
| 1678.679967 | 114.227924 | 2.57797E-06 | 0.004327578 |
| 1678.719967 | 123.063363 | 2.77737E-06 | 0.004662424 |
| 1678.759967 | 140.820803 | 3.17813E-06 | 0.005335316 |
| 1678.799967 | 143.215719 | 3.23218E-06 | 0.005426182 |
| 1678.839967 | 115.940089 | 2.61661E-06 | 0.004392863 |
| 1678.879967 | 104.419043 | 2.35659E-06 | 0.003956436 |
| 1678.919967 | 116.840902 | 2.63694E-06 | 0.004427205 |
| 1678.959967 | 127.594903 | 2.87964E-06 | 0.004834799 |
| 1678.999967 | 120.86546  | 2.72777E-06 | 0.004579917 |
| 1679.039967 | 116.283238 | 2.62435E-06 | 0.00440639  |



|             |            |             |             |
|-------------|------------|-------------|-------------|
| 1679.079967 | 121.996371 | 2.75329E-06 | 0.004622991 |
| 1679.119967 | 129.428535 | 2.92102E-06 | 0.004904746 |
| 1679.159967 | 128.331501 | 2.89626E-06 | 0.004863289 |
| 1679.199967 | 144.383771 | 3.25854E-06 | 0.005471741 |
| 1679.239967 | 151.383896 | 3.41652E-06 | 0.005737163 |
| 1679.279967 | 140.380768 | 3.1682E-06  | 0.005320292 |
| 1679.319967 | 130.653126 | 2.94866E-06 | 0.004951742 |
| 1679.359967 | 137.062947 | 3.09332E-06 | 0.005194797 |
| 1679.399967 | 154.719474 | 3.4918E-06  | 0.005864134 |
| 1679.439967 | 145.358867 | 3.28055E-06 | 0.005509482 |
| 1679.479967 | 128.710835 | 2.90482E-06 | 0.004878594 |
| 1679.519967 | 110.603891 | 2.49618E-06 | 0.004192377 |
| 1679.559967 | 99.823917  | 2.25289E-06 | 0.003783858 |
| 1679.599967 | 95.830452  | 2.16276E-06 | 0.003632571 |
| 1679.639967 | 99.059809  | 2.23564E-06 | 0.003755074 |
| 1679.679967 | 109.827921 | 2.47866E-06 | 0.004163361 |
| 1679.719967 | 124.162295 | 2.80217E-06 | 0.004706861 |
| 1679.759967 | 122.666399 | 2.76841E-06 | 0.004650264 |
| 1679.799967 | 111.069935 | 2.50669E-06 | 0.004210744 |
| 1679.839967 | 101.224282 | 2.28449E-06 | 0.003837579 |
| 1679.879967 | 101.461715 | 2.28985E-06 | 0.003846672 |
| 1679.919967 | 112.730671 | 2.54417E-06 | 0.004274009 |
| 1679.959967 | 130.00236  | 2.93397E-06 | 0.004928956 |
| 1679.999967 | 126.394396 | 2.85255E-06 | 0.004792276 |
| 1680.039967 | 120.609279 | 2.72198E-06 | 0.004573041 |
| 1680.079967 | 117.769211 | 2.65789E-06 | 0.004465463 |
| 1680.119967 | 115.544028 | 2.60767E-06 | 0.004381195 |
| 1680.159967 | 126.446671 | 2.85373E-06 | 0.004794715 |
| 1680.199967 | 135.983054 | 3.06895E-06 | 0.005156447 |
| 1680.239967 | 134.576701 | 3.03721E-06 | 0.005103239 |
| 1680.279967 | 133.23066  | 3.00683E-06 | 0.005052317 |
| 1680.319967 | 142.905828 | 3.22519E-06 | 0.005419344 |
| 1680.359967 | 145.516608 | 3.28411E-06 | 0.005518482 |
| 1680.399967 | 145.268954 | 3.27852E-06 | 0.005509221 |
| 1680.439967 | 136.847663 | 3.08846E-06 | 0.005189974 |
| 1680.479967 | 114.239985 | 2.57824E-06 | 0.004332676 |
| 1680.519967 | 93.741419  | 2.11561E-06 | 0.00355533  |
| 1680.559967 | 88.743393  | 2.00281E-06 | 0.00336585  |
| 1680.599967 | 98.734341  | 2.2283E-06  | 0.003744875 |
| 1680.639967 | 119.760944 | 2.70284E-06 | 0.004542497 |
| 1680.679967 | 117.813523 | 2.65889E-06 | 0.004468738 |
| 1680.719967 | 113.671229 | 2.5654E-06  | 0.004311721 |
| 1680.759967 | 119.73467  | 2.70224E-06 | 0.004541825 |
| 1680.799967 | 121.682854 | 2.74621E-06 | 0.004615834 |
| 1680.839967 | 128.182521 | 2.8929E-06  | 0.004862504 |
| 1680.879967 | 135.213258 | 3.05157E-06 | 0.005129331 |

|             |            |             |             |
|-------------|------------|-------------|-------------|
| 1680.919967 | 138.176623 | 3.11845E-06 | 0.005241871 |
| 1680.959967 | 108.709441 | 2.45342E-06 | 0.004124102 |
| 1680.999967 | 94.847307  | 2.14057E-06 | 0.003598301 |
| 1681.039967 | 106.405471 | 2.40142E-06 | 0.004036888 |
| 1681.079967 | 121.793358 | 2.74871E-06 | 0.004620795 |
| 1681.119967 | 128.192064 | 2.89312E-06 | 0.004863676 |
| 1681.159967 | 128.573527 | 2.90173E-06 | 0.004878265 |
| 1681.199967 | 141.908713 | 3.20268E-06 | 0.005384349 |
| 1681.239967 | 149.549391 | 3.37512E-06 | 0.005674389 |
| 1681.279967 | 158.705329 | 3.58176E-06 | 0.006021938 |
| 1681.319967 | 158.53235  | 3.57785E-06 | 0.006015518 |
| 1681.359967 | 139.470395 | 3.14765E-06 | 0.005292337 |
| 1681.399967 | 119.85333  | 2.70492E-06 | 0.004548057 |
| 1681.439967 | 118.491249 | 2.67418E-06 | 0.004496477 |
| 1681.479967 | 127.134284 | 2.86924E-06 | 0.004824576 |
| 1681.519967 | 122.508179 | 2.76484E-06 | 0.004649132 |
| 1681.559967 | 116.635169 | 2.63229E-06 | 0.004426359 |
| 1681.599967 | 107.523811 | 2.42666E-06 | 0.004080676 |
| 1681.639967 | 90.364654  | 2.0394E-06  | 0.003429544 |
| 1681.679967 | 89.264844  | 2.01458E-06 | 0.003387884 |
| 1681.719967 | 90.573046  | 2.04411E-06 | 0.003437616 |
| 1681.759967 | 94.086066  | 2.12339E-06 | 0.003571035 |
| 1681.799967 | 98.174239  | 2.21566E-06 | 0.00372629  |
| 1681.839967 | 100.383303 | 2.26551E-06 | 0.003810227 |
| 1681.879967 | 91.145171  | 2.05702E-06 | 0.00345966  |
| 1681.919967 | 102.360383 | 2.31013E-06 | 0.003885456 |
| 1681.959967 | 120.790361 | 2.72607E-06 | 0.004585141 |
| 1681.999967 | 119.335855 | 2.69324E-06 | 0.004530036 |
| 1682.039967 | 111.888129 | 2.52516E-06 | 0.004247419 |
| 1682.079967 | 119.666995 | 2.70072E-06 | 0.004542823 |
| 1682.119967 | 133.557573 | 3.01421E-06 | 0.00507026  |
| 1682.159967 | 130.576942 | 2.94694E-06 | 0.004957224 |
| 1682.199967 | 132.053606 | 2.98027E-06 | 0.005013403 |
| 1682.239967 | 126.846815 | 2.86276E-06 | 0.004815842 |
| 1682.279967 | 146.710642 | 3.31105E-06 | 0.005570121 |
| 1682.319967 | 167.555743 | 3.7815E-06  | 0.006361693 |
| 1682.359967 | 157.070384 | 3.54486E-06 | 0.00596373  |
| 1682.399967 | 136.495062 | 3.0805E-06  | 0.005182639 |
| 1682.439967 | 117.895704 | 2.66074E-06 | 0.004476538 |
| 1682.479967 | 112.073087 | 2.52933E-06 | 0.004255553 |
| 1682.519967 | 116.078515 | 2.61973E-06 | 0.004407749 |
| 1682.559967 | 117.310685 | 2.64754E-06 | 0.004454643 |
| 1682.599967 | 122.765981 | 2.77066E-06 | 0.004661908 |
| 1682.639967 | 116.552432 | 2.63043E-06 | 0.00442606  |
| 1682.679967 | 104.248977 | 2.35275E-06 | 0.003958932 |
| 1682.719967 | 106.005524 | 2.3924E-06  | 0.004025734 |

|             |            |             |             |
|-------------|------------|-------------|-------------|
| 1682.759967 | 111.464605 | 2.5156E-06  | 0.004233152 |
| 1682.799967 | 124.162014 | 2.80216E-06 | 0.004715481 |
| 1682.839967 | 119.374484 | 2.69412E-06 | 0.004533766 |
| 1682.879967 | 108.322838 | 2.4447E-06  | 0.004114129 |
| 1682.919967 | 101.191813 | 2.28376E-06 | 0.003843382 |
| 1682.959967 | 96.386264  | 2.1753E-06  | 0.003660949 |
| 1682.999967 | 105.152366 | 2.37314E-06 | 0.003993999 |
| 1683.039967 | 108.833163 | 2.45621E-06 | 0.004133904 |
| 1683.079967 | 119.883301 | 2.7056E-06  | 0.00455374  |
| 1683.119967 | 121.104876 | 2.73317E-06 | 0.00460025  |
| 1683.159967 | 116.16101  | 2.62159E-06 | 0.004412559 |
| 1683.199967 | 125.425776 | 2.83069E-06 | 0.004764609 |
| 1683.239967 | 142.385976 | 3.21345E-06 | 0.005409013 |
| 1683.279967 | 166.975189 | 3.7684E-06  | 0.006343268 |
| 1683.319967 | 199.686867 | 4.50665E-06 | 0.007586141 |
| 1683.359967 | 203.280011 | 4.58775E-06 | 0.007722829 |
| 1683.399967 | 182.173671 | 4.11141E-06 | 0.006921141 |
| 1683.439967 | 138.060481 | 3.11583E-06 | 0.005245317 |
| 1683.479967 | 103.344795 | 2.33235E-06 | 0.003926461 |
| 1683.519967 | 103.350946 | 2.33249E-06 | 0.003926788 |
| 1683.559967 | 107.635757 | 2.42919E-06 | 0.004089686 |
| 1683.599967 | 105.680667 | 2.38507E-06 | 0.004015496 |
| 1683.639967 | 111.165793 | 2.50886E-06 | 0.004224012 |
| 1683.679967 | 98.4829    | 2.22262E-06 | 0.003742184 |
| 1683.719967 | 91.235112  | 2.05905E-06 | 0.003466863 |
| 1683.759967 | 105.883753 | 2.38965E-06 | 0.004023595 |
| 1683.799967 | 125.950512 | 2.84253E-06 | 0.004786248 |
| 1683.839967 | 111.306735 | 2.51204E-06 | 0.00422987  |
| 1683.879967 | 95.629809  | 2.15823E-06 | 0.003634203 |
| 1683.919967 | 100.215486 | 2.26172E-06 | 0.003808562 |
| 1683.959967 | 106.250082 | 2.39792E-06 | 0.004037995 |
| 1683.999967 | 110.831474 | 2.50131E-06 | 0.004212209 |
| 1684.039967 | 107.19346  | 2.41921E-06 | 0.004074041 |
| 1684.079967 | 109.875769 | 2.47974E-06 | 0.004176086 |
| 1684.119967 | 122.73095  | 2.76987E-06 | 0.004664788 |
| 1684.159967 | 124.047636 | 2.79958E-06 | 0.004714945 |
| 1684.199967 | 126.099129 | 2.84588E-06 | 0.004793034 |
| 1684.239967 | 123.229526 | 2.78112E-06 | 0.004684071 |
| 1684.279967 | 128.326651 | 2.89615E-06 | 0.004877934 |
| 1684.319967 | 137.857087 | 3.11124E-06 | 0.005240328 |
| 1684.359967 | 147.952916 | 3.33909E-06 | 0.005624232 |
| 1684.399967 | 152.036812 | 3.43126E-06 | 0.005779613 |
| 1684.439967 | 133.979996 | 3.02374E-06 | 0.005093312 |
| 1684.479967 | 122.558047 | 2.76596E-06 | 0.004659212 |
| 1684.519967 | 134.612734 | 3.03802E-06 | 0.005117609 |
| 1684.559967 | 131.702199 | 2.97234E-06 | 0.005007077 |

|             |            |             |             |
|-------------|------------|-------------|-------------|
| 1684.599967 | 130.55951  | 2.94655E-06 | 0.004963752 |
| 1684.639967 | 124.245371 | 2.80404E-06 | 0.004723806 |
| 1684.679967 | 123.240173 | 2.78136E-06 | 0.0046857   |
| 1684.719967 | 120.837235 | 2.72713E-06 | 0.004594447 |
| 1684.759967 | 106.254941 | 2.39803E-06 | 0.004040098 |
| 1684.799967 | 95.292129  | 2.15061E-06 | 0.003623349 |
| 1684.839967 | 106.318782 | 2.39947E-06 | 0.004042718 |
| 1684.879967 | 116.757835 | 2.63506E-06 | 0.004439763 |
| 1684.919967 | 123.247746 | 2.78153E-06 | 0.004686655 |
| 1684.959967 | 131.027742 | 2.95711E-06 | 0.004982618 |
| 1684.999967 | 123.365605 | 2.78419E-06 | 0.00469136  |
| 1685.039967 | 122.243823 | 2.75887E-06 | 0.004648811 |
| 1685.079967 | 125.408399 | 2.83029E-06 | 0.00476927  |
| 1685.119967 | 124.745223 | 2.81533E-06 | 0.004744162 |
| 1685.159967 | 124.600564 | 2.81206E-06 | 0.004738773 |
| 1685.199967 | 125.52683  | 2.83297E-06 | 0.004774114 |
| 1685.239967 | 122.602917 | 2.76698E-06 | 0.00466302  |
| 1685.279967 | 124.065638 | 2.79999E-06 | 0.004718765 |
| 1685.319967 | 119.530579 | 2.69764E-06 | 0.004546384 |
| 1685.359967 | 122.167204 | 2.75714E-06 | 0.004646779 |
| 1685.399967 | 131.039034 | 2.95737E-06 | 0.004984349 |
| 1685.439967 | 128.299723 | 2.89555E-06 | 0.004880269 |
| 1685.479967 | 117.609973 | 2.65429E-06 | 0.004473758 |
| 1685.519967 | 104.579503 | 2.36021E-06 | 0.003978187 |
| 1685.559967 | 105.016074 | 2.37007E-06 | 0.003994889 |
| 1685.599967 | 103.148773 | 2.32792E-06 | 0.003923949 |
| 1685.639967 | 107.164508 | 2.41855E-06 | 0.004076811 |
| 1685.679967 | 111.819439 | 2.52361E-06 | 0.004253997 |
| 1685.719967 | 114.668807 | 2.58792E-06 | 0.0043625   |
| 1685.759967 | 115.672946 | 2.61058E-06 | 0.004400807 |
| 1685.799967 | 107.629708 | 2.42905E-06 | 0.004094897 |
| 1685.839967 | 108.473899 | 2.4481E-06  | 0.004127113 |
| 1685.879967 | 107.438744 | 2.42474E-06 | 0.004087825 |
| 1685.919967 | 97.642753  | 2.20366E-06 | 0.003715196 |
| 1685.959967 | 109.105212 | 2.46235E-06 | 0.004151428 |
| 1685.999967 | 112.04233  | 2.52864E-06 | 0.004263286 |
| 1686.039967 | 110.201354 | 2.48709E-06 | 0.004193335 |
| 1686.079967 | 114.783488 | 2.5905E-06  | 0.004367796 |
| 1686.119967 | 122.076193 | 2.75509E-06 | 0.004645412 |
| 1686.159967 | 130.342848 | 2.94166E-06 | 0.004960103 |
| 1686.199967 | 121.93758  | 2.75196E-06 | 0.004640357 |
| 1686.239967 | 118.115224 | 2.6657E-06  | 0.004495003 |
| 1686.279967 | 111.6414   | 2.51959E-06 | 0.004248736 |
| 1686.319967 | 102.39618  | 2.31094E-06 | 0.003896983 |
| 1686.359967 | 115.525543 | 2.60725E-06 | 0.004396763 |
| 1686.399967 | 130.734519 | 2.9505E-06  | 0.004975716 |

|             |            |             |             |
|-------------|------------|-------------|-------------|
| 1686.439967 | 131.176887 | 2.96048E-06 | 0.004992671 |
| 1686.479967 | 133.750031 | 3.01855E-06 | 0.005090727 |
| 1686.519967 | 128.89115  | 2.90889E-06 | 0.004905907 |
| 1686.559967 | 112.627405 | 2.54184E-06 | 0.004286972 |
| 1686.599967 | 116.133711 | 2.62098E-06 | 0.004420538 |
| 1686.639967 | 121.651491 | 2.7455E-06  | 0.004630678 |
| 1686.679967 | 100.2194   | 2.26181E-06 | 0.003814953 |
| 1686.719967 | 90.27381   | 2.03735E-06 | 0.003436446 |
| 1686.759967 | 87.943481  | 1.98476E-06 | 0.003347817 |
| 1686.799967 | 101.297169 | 2.28614E-06 | 0.003856254 |
| 1686.839967 | 137.267511 | 3.09794E-06 | 0.005225723 |
| 1686.879967 | 149.554227 | 3.37523E-06 | 0.005693609 |
| 1686.919967 | 129.174205 | 2.91528E-06 | 0.004917847 |
| 1686.959967 | 101.82938  | 2.29815E-06 | 0.003876882 |
| 1686.999967 | 94.998309  | 2.14398E-06 | 0.003616893 |
| 1687.039967 | 113.605903 | 2.56393E-06 | 0.004325447 |
| 1687.079967 | 136.859579 | 3.08873E-06 | 0.005210935 |
| 1687.119967 | 136.770652 | 3.08672E-06 | 0.005207672 |
| 1687.159967 | 148.93978  | 3.36136E-06 | 0.005671158 |
| 1687.199967 | 162.758124 | 3.67322E-06 | 0.006197464 |
| 1687.239967 | 151.536185 | 3.41996E-06 | 0.005770294 |
| 1687.279967 | 149.236501 | 3.36806E-06 | 0.00568286  |
| 1687.319967 | 150.407392 | 3.39449E-06 | 0.005727583 |
| 1687.359967 | 151.51833  | 3.41956E-06 | 0.005770025 |
| 1687.399967 | 136.208988 | 3.07405E-06 | 0.005187147 |
| 1687.439967 | 122.597971 | 2.76687E-06 | 0.004668919 |
| 1687.479967 | 115.38348  | 2.60404E-06 | 0.004394273 |
| 1687.519967 | 110.965087 | 2.50433E-06 | 0.004226103 |
| 1687.559967 | 101.413863 | 2.28877E-06 | 0.003862436 |
| 1687.599967 | 102.317769 | 2.30917E-06 | 0.003896954 |
| 1687.639967 | 103.14555  | 2.32785E-06 | 0.003928575 |
| 1687.679967 | 114.460164 | 2.58321E-06 | 0.004359626 |
| 1687.719967 | 118.235032 | 2.6684E-06  | 0.004503512 |
| 1687.759967 | 119.537195 | 2.69779E-06 | 0.004553219 |
| 1687.799967 | 113.478209 | 2.56105E-06 | 0.004322532 |
| 1687.839967 | 102.326524 | 2.30937E-06 | 0.003897842 |
| 1687.879967 | 105.526107 | 2.38158E-06 | 0.004019817 |
| 1687.919967 | 109.565432 | 2.47274E-06 | 0.004173786 |
| 1687.959967 | 108.324165 | 2.44473E-06 | 0.004126599 |
| 1687.999967 | 102.945391 | 2.32333E-06 | 0.003921788 |
| 1688.039967 | 119.957102 | 2.70726E-06 | 0.004569971 |
| 1688.079967 | 144.294642 | 3.25653E-06 | 0.005497282 |
| 1688.119967 | 134.521755 | 3.03597E-06 | 0.005125079 |
| 1688.159967 | 119.645943 | 2.70024E-06 | 0.004558441 |
| 1688.199967 | 102.280468 | 2.30833E-06 | 0.003896919 |
| 1688.239967 | 99.590101  | 2.24761E-06 | 0.003794505 |

|             |            |             |             |
|-------------|------------|-------------|-------------|
| 1688.279967 | 121.059254 | 2.73214E-06 | 0.004612615 |
| 1688.319967 | 126.764932 | 2.86091E-06 | 0.004830128 |
| 1688.359967 | 122.288436 | 2.75988E-06 | 0.00465967  |
| 1688.399967 | 130.524196 | 2.94575E-06 | 0.004973603 |
| 1688.439967 | 152.491745 | 3.44153E-06 | 0.005810811 |
| 1688.479967 | 156.589953 | 3.53402E-06 | 0.005967117 |
| 1688.519967 | 144.79986  | 3.26793E-06 | 0.005517967 |
| 1688.559967 | 126.384849 | 2.85233E-06 | 0.00481633  |
| 1688.599967 | 116.677305 | 2.63324E-06 | 0.004446496 |
| 1688.639967 | 108.961181 | 2.4591E-06  | 0.004152538 |
| 1688.679967 | 87.928469  | 1.98442E-06 | 0.003351055 |
| 1688.719967 | 82.405588  | 1.85978E-06 | 0.003140647 |
| 1688.759967 | 98.312414  | 2.21877E-06 | 0.003746977 |
| 1688.799967 | 117.113652 | 2.64309E-06 | 0.004463654 |
| 1688.839967 | 119.045506 | 2.68669E-06 | 0.004537392 |
| 1688.879967 | 111.455821 | 2.5154E-06  | 0.004248213 |
| 1688.919967 | 107.713532 | 2.43094E-06 | 0.004105671 |
| 1688.959967 | 117.93642  | 2.66166E-06 | 0.004495438 |
| 1688.999967 | 136.596577 | 3.08279E-06 | 0.00520684  |
| 1689.039967 | 134.881219 | 3.04408E-06 | 0.005141575 |
| 1689.079967 | 121.271942 | 2.73694E-06 | 0.004622909 |
| 1689.119967 | 107.449669 | 2.42499E-06 | 0.004096098 |
| 1689.159967 | 108.366455 | 2.44568E-06 | 0.004131145 |
| 1689.199967 | 128.871475 | 2.90845E-06 | 0.004912953 |
| 1689.239967 | 131.316816 | 2.96364E-06 | 0.005006295 |
| 1689.279967 | 131.118402 | 2.95916E-06 | 0.004998849 |
| 1689.319967 | 130.184983 | 2.93809E-06 | 0.00496338  |
| 1689.359967 | 110.118281 | 2.48522E-06 | 0.004198425 |
| 1689.399967 | 105.157855 | 2.37327E-06 | 0.004009396 |
| 1689.439967 | 102.399809 | 2.31102E-06 | 0.003904331 |
| 1689.479967 | 94.683201  | 2.13687E-06 | 0.003610196 |
| 1689.519967 | 100.701927 | 2.2727E-06  | 0.003839776 |
| 1689.559967 | 101.872029 | 2.29911E-06 | 0.003884484 |
| 1689.599967 | 98.718089  | 2.22793E-06 | 0.00376431  |
| 1689.639967 | 97.803224  | 2.20728E-06 | 0.003729513 |
| 1689.679967 | 98.050659  | 2.21287E-06 | 0.003739037 |
| 1689.719967 | 98.135593  | 2.21478E-06 | 0.003742364 |
| 1689.759967 | 104.295195 | 2.3538E-06  | 0.003977352 |
| 1689.799967 | 111.642927 | 2.51963E-06 | 0.004257663 |
| 1689.839967 | 125.619825 | 2.83506E-06 | 0.004790805 |
| 1689.879967 | 133.708836 | 3.01762E-06 | 0.005099419 |
| 1689.919967 | 119.479547 | 2.69649E-06 | 0.004556847 |
| 1689.959967 | 119.208219 | 2.69036E-06 | 0.004546607 |
| 1689.999967 | 110.718292 | 2.49876E-06 | 0.0042229   |
| 1690.039967 | 98.943526  | 2.23302E-06 | 0.003773889 |
| 1690.079967 | 114.421768 | 2.58234E-06 | 0.004364361 |

|             |            |             |             |
|-------------|------------|-------------|-------------|
| 1690.119967 | 113.06777  | 2.55178E-06 | 0.004312818 |
| 1690.159967 | 114.623011 | 2.58688E-06 | 0.004372244 |
| 1690.199967 | 122.146273 | 2.75667E-06 | 0.004659326 |
| 1690.239967 | 119.386212 | 2.69438E-06 | 0.00455415  |
| 1690.279967 | 107.946178 | 2.43619E-06 | 0.004117851 |
| 1690.319967 | 109.692674 | 2.47561E-06 | 0.004184574 |
| 1690.359967 | 118.449075 | 2.67323E-06 | 0.004518722 |
| 1690.399967 | 117.386479 | 2.64925E-06 | 0.004478291 |
| 1690.439967 | 112.693432 | 2.54333E-06 | 0.004299353 |
| 1690.479967 | 129.092735 | 2.91344E-06 | 0.004925117 |
| 1690.519967 | 145.583618 | 3.28562E-06 | 0.005554405 |
| 1690.559967 | 141.978476 | 3.20426E-06 | 0.005416988 |
| 1690.599967 | 113.362453 | 2.55843E-06 | 0.004325286 |
| 1690.639967 | 94.065031  | 2.12292E-06 | 0.003589088 |
| 1690.679967 | 92.693374  | 2.09196E-06 | 0.003536835 |
| 1690.719967 | 104.819459 | 2.36563E-06 | 0.003999617 |
| 1690.759967 | 108.746896 | 2.45427E-06 | 0.004149575 |
| 1690.799967 | 104.392387 | 2.35599E-06 | 0.003983509 |
| 1690.839967 | 111.666913 | 2.52017E-06 | 0.004261199 |
| 1690.879967 | 142.77258  | 3.22218E-06 | 0.005448317 |
| 1690.919967 | 153.85105  | 3.4722E-06  | 0.005871219 |
| 1690.959967 | 134.460645 | 3.03459E-06 | 0.005131369 |
| 1690.999967 | 119.376357 | 2.69416E-06 | 0.004555821 |
| 1691.039967 | 124.888684 | 2.81856E-06 | 0.004766304 |
| 1691.079967 | 136.646338 | 3.08392E-06 | 0.005215151 |
| 1691.119967 | 134.061654 | 3.02558E-06 | 0.005116627 |
| 1691.159967 | 120.984384 | 2.73045E-06 | 0.004617626 |
| 1691.199967 | 124.45687  | 2.80882E-06 | 0.004750273 |
| 1691.239967 | 134.55646  | 3.03675E-06 | 0.005135876 |
| 1691.279967 | 130.110629 | 2.93642E-06 | 0.004966301 |
| 1691.319967 | 132.512375 | 2.99062E-06 | 0.005058095 |
| 1691.359967 | 141.379495 | 3.19074E-06 | 0.005396687 |
| 1691.399967 | 145.861567 | 3.29189E-06 | 0.005567907 |
| 1691.439967 | 138.047244 | 3.11553E-06 | 0.005269739 |
| 1691.479967 | 128.233236 | 2.89405E-06 | 0.00489522  |
| 1691.519967 | 119.78069  | 2.70328E-06 | 0.004572658 |
| 1691.559967 | 101.391379 | 2.28826E-06 | 0.003870733 |
| 1691.599967 | 90.232566  | 2.03642E-06 | 0.003444814 |
| 1691.639967 | 96.06911   | 2.16815E-06 | 0.003667722 |
| 1691.679967 | 91.844471  | 2.0728E-06  | 0.003506517 |
| 1691.719967 | 94.650399  | 2.13613E-06 | 0.00361373  |
| 1691.759967 | 118.610307 | 2.67687E-06 | 0.004528621 |
| 1691.799967 | 131.982148 | 2.97865E-06 | 0.005039285 |
| 1691.839967 | 124.320049 | 2.80573E-06 | 0.004746847 |
| 1691.879967 | 114.516192 | 2.58447E-06 | 0.004372615 |
| 1691.919967 | 108.597945 | 2.4509E-06  | 0.004146734 |

|             |            |             |             |
|-------------|------------|-------------|-------------|
| 1691.959967 | 103.52912  | 2.33651E-06 | 0.003953278 |
| 1691.999967 | 106.73595  | 2.40888E-06 | 0.004075828 |
| 1692.039967 | 116.272958 | 2.62412E-06 | 0.004440114 |
| 1692.079967 | 115.298575 | 2.60213E-06 | 0.004403009 |
| 1692.119967 | 108.154044 | 2.44089E-06 | 0.004130272 |
| 1692.159967 | 112.506937 | 2.53912E-06 | 0.004296605 |
| 1692.199967 | 118.586173 | 2.67632E-06 | 0.004528877 |
| 1692.239967 | 118.897723 | 2.68336E-06 | 0.004540882 |
| 1692.279967 | 106.744721 | 2.40908E-06 | 0.004076837 |
| 1692.319967 | 115.658678 | 2.61026E-06 | 0.004417387 |
| 1692.359967 | 126.033597 | 2.8444E-06  | 0.004813753 |
| 1692.399967 | 123.879701 | 2.79579E-06 | 0.004731599 |
| 1692.439967 | 114.807264 | 2.59104E-06 | 0.00438518  |
| 1692.479967 | 101.742596 | 2.29619E-06 | 0.003886253 |
| 1692.519967 | 97.511641  | 2.2007E-06  | 0.003724732 |
| 1692.559967 | 105.059445 | 2.37105E-06 | 0.004013136 |
| 1692.599967 | 104.720642 | 2.3634E-06  | 0.004000289 |
| 1692.639967 | 99.599164  | 2.24781E-06 | 0.00380474  |
| 1692.679967 | 84.882291  | 1.91568E-06 | 0.003242625 |
| 1692.719967 | 73.302226  | 1.65433E-06 | 0.002800316 |
| 1692.759967 | 80.944978  | 1.82682E-06 | 0.00309236  |
| 1692.799967 | 93.443458  | 2.10889E-06 | 0.003569927 |
| 1692.839967 | 117.268121 | 2.64658E-06 | 0.004480233 |
| 1692.879967 | 120.211484 | 2.71301E-06 | 0.004592793 |
| 1692.919967 | 105.464163 | 2.38018E-06 | 0.004029453 |
| 1692.959967 | 111.908208 | 2.52561E-06 | 0.004275761 |
| 1692.999967 | 110.788202 | 2.50034E-06 | 0.004233068 |
| 1693.039967 | 112.057292 | 2.52898E-06 | 0.004281659 |
| 1693.079967 | 119.089406 | 2.68768E-06 | 0.004550461 |
| 1693.119967 | 129.782763 | 2.92902E-06 | 0.004959176 |
| 1693.159967 | 132.109419 | 2.98153E-06 | 0.0050482   |
| 1693.199967 | 154.178889 | 3.4796E-06  | 0.005891663 |
| 1693.239967 | 171.656077 | 3.87404E-06 | 0.006559677 |
| 1693.279967 | 160.411939 | 3.62027E-06 | 0.006130137 |
| 1693.319967 | 133.094025 | 3.00375E-06 | 0.005086304 |
| 1693.359967 | 112.536908 | 2.5398E-06  | 0.004300798 |
| 1693.399967 | 108.925129 | 2.45829E-06 | 0.004162866 |
| 1693.439967 | 116.75663  | 2.63503E-06 | 0.004462273 |
| 1693.479967 | 119.718802 | 2.70189E-06 | 0.004575591 |
| 1693.519967 | 109.059311 | 2.46132E-06 | 0.004168289 |
| 1693.559967 | 110.207235 | 2.48722E-06 | 0.004212263 |
| 1693.599967 | 106.457645 | 2.4026E-06  | 0.004069045 |
| 1693.639967 | 91.744944  | 2.07056E-06 | 0.003506776 |
| 1693.679967 | 86.464419  | 1.95138E-06 | 0.003305016 |
| 1693.719967 | 80.728229  | 1.82192E-06 | 0.003085829 |
| 1693.759967 | 88.13511   | 1.98909E-06 | 0.003369035 |



|             |            |             |             |
|-------------|------------|-------------|-------------|
| 1693.799967 | 94.231984  | 2.12668E-06 | 0.003602178 |
| 1693.839967 | 103.403377 | 2.33367E-06 | 0.003952864 |
| 1693.879967 | 102.993917 | 2.32443E-06 | 0.003937304 |
| 1693.919967 | 91.755126  | 2.07079E-06 | 0.003507745 |
| 1693.959967 | 80.729309  | 1.82195E-06 | 0.003086307 |
| 1693.999967 | 75.97684   | 1.71469E-06 | 0.002904687 |
| 1694.039967 | 79.348204  | 1.79078E-06 | 0.00303365  |
| 1694.079967 | 79.376559  | 1.79142E-06 | 0.003034806 |
| 1694.119967 | 93.460463  | 2.10927E-06 | 0.003573361 |
| 1694.159967 | 120.720224 | 2.72449E-06 | 0.004615717 |
| 1694.199967 | 141.240269 | 3.1876E-06  | 0.005400425 |
| 1694.239967 | 142.804546 | 3.2229E-06  | 0.005460365 |
| 1694.279967 | 149.80119  | 3.3808E-06  | 0.005728029 |
| 1694.319967 | 155.195687 | 3.50255E-06 | 0.005934441 |
| 1694.359967 | 143.964156 | 3.24907E-06 | 0.005505095 |
| 1694.399967 | 129.213835 | 2.91618E-06 | 0.004941169 |
| 1694.439967 | 133.436221 | 3.01147E-06 | 0.005102755 |
| 1694.479967 | 124.435734 | 2.80834E-06 | 0.004758678 |
| 1694.519967 | 112.150773 | 2.53109E-06 | 0.004288977 |
| 1694.559967 | 104.717238 | 2.36332E-06 | 0.004004791 |
| 1694.599967 | 96.93966   | 2.18779E-06 | 0.003707434 |
| 1694.639967 | 97.508792  | 2.20064E-06 | 0.003729288 |
| 1694.679967 | 107.002538 | 2.4149E-06  | 0.00409248  |
| 1694.719967 | 102.806827 | 2.32021E-06 | 0.003932101 |
| 1694.759967 | 97.449737  | 2.1993E-06  | 0.003727294 |
| 1694.799967 | 98.910244  | 2.23227E-06 | 0.003783245 |
| 1694.839967 | 96.795831  | 2.18455E-06 | 0.003702458 |
| 1694.879967 | 100.824296 | 2.27546E-06 | 0.003856638 |
| 1694.919967 | 114.50351  | 2.58418E-06 | 0.004379986 |
| 1694.959967 | 112.611236 | 2.54148E-06 | 0.004307705 |
| 1694.999967 | 109.78448  | 2.47768E-06 | 0.004199672 |
| 1695.039967 | 115.345903 | 2.6032E-06  | 0.004412522 |
| 1695.079967 | 112.289073 | 2.53421E-06 | 0.004295685 |
| 1695.119967 | 99.880007  | 2.25415E-06 | 0.003821059 |
| 1695.159967 | 92.984589  | 2.09853E-06 | 0.003557349 |
| 1695.199967 | 98.264276  | 2.21769E-06 | 0.003759424 |
| 1695.239967 | 118.393216 | 2.67197E-06 | 0.00452963  |
| 1695.279967 | 116.373685 | 2.62639E-06 | 0.00445247  |
| 1695.319967 | 123.743838 | 2.79273E-06 | 0.004734564 |
| 1695.359967 | 134.922736 | 3.04502E-06 | 0.005162402 |
| 1695.399967 | 123.939519 | 2.79714E-06 | 0.004742275 |
| 1695.439967 | 135.452071 | 3.05696E-06 | 0.0051829   |
| 1695.479967 | 146.192854 | 3.29937E-06 | 0.005594014 |
| 1695.519967 | 135.629523 | 3.06097E-06 | 0.005189935 |
| 1695.559967 | 117.535813 | 2.65262E-06 | 0.004497676 |
| 1695.599967 | 111.167923 | 2.50891E-06 | 0.0042541   |

|             |            |             |             |
|-------------|------------|-------------|-------------|
| 1695.639967 | 118.723081 | 2.67941E-06 | 0.004543322 |
| 1695.679967 | 124.30403  | 2.80537E-06 | 0.004757008 |
| 1695.719967 | 116.25327  | 2.62367E-06 | 0.004449017 |
| 1695.759967 | 96.993608  | 2.18901E-06 | 0.003712037 |
| 1695.799967 | 87.007525  | 1.96364E-06 | 0.003329938 |
| 1695.839967 | 92.07627   | 2.07803E-06 | 0.003524012 |
| 1695.879967 | 106.335928 | 2.39985E-06 | 0.004069864 |
| 1695.919967 | 126.634183 | 2.85796E-06 | 0.004846867 |
| 1695.959967 | 133.364294 | 3.00985E-06 | 0.005104579 |
| 1695.999967 | 121.714987 | 2.74694E-06 | 0.004658806 |
| 1696.039967 | 113.90166  | 2.5706E-06  | 0.004359843 |
| 1696.079967 | 116.217092 | 2.62286E-06 | 0.004448577 |
| 1696.119967 | 122.213659 | 2.75819E-06 | 0.004678225 |
| 1696.159967 | 132.223541 | 2.9841E-06  | 0.005061513 |
| 1696.199967 | 139.68413  | 3.15248E-06 | 0.00534723  |
| 1696.239967 | 150.366403 | 3.39356E-06 | 0.005756293 |
| 1696.279967 | 163.621696 | 3.69271E-06 | 0.006263876 |
| 1696.319967 | 144.288763 | 3.2564E-06  | 0.00552389  |
| 1696.359967 | 115.932396 | 2.61643E-06 | 0.004438412 |
| 1696.399967 | 102.449624 | 2.31215E-06 | 0.003922323 |
| 1696.439967 | 108.956005 | 2.45899E-06 | 0.004171521 |
| 1696.479967 | 121.643626 | 2.74533E-06 | 0.004657393 |
| 1696.519967 | 122.01824  | 2.75378E-06 | 0.004671846 |
| 1696.559967 | 112.167449 | 2.53146E-06 | 0.004294779 |
| 1696.599967 | 103.145566 | 2.32785E-06 | 0.003949433 |
| 1696.639967 | 105.593676 | 2.3831E-06  | 0.004043266 |
| 1696.679967 | 94.44857   | 2.13157E-06 | 0.003616597 |
| 1696.719967 | 106.262711 | 2.3982E-06  | 0.004069076 |
| 1696.759967 | 114.184237 | 2.57698E-06 | 0.004372515 |
| 1696.799967 | 120.206332 | 2.71289E-06 | 0.004603231 |
| 1696.839967 | 118.719101 | 2.67932E-06 | 0.004546385 |
| 1696.879967 | 118.833815 | 2.68191E-06 | 0.004550886 |
| 1696.919967 | 122.03171  | 2.75409E-06 | 0.004673463 |
| 1696.959967 | 101.31     | 2.28643E-06 | 0.003879973 |
| 1696.999967 | 87.884256  | 1.98343E-06 | 0.003365873 |
| 1697.039967 | 107.636925 | 2.42922E-06 | 0.004122476 |
| 1697.079967 | 108.486585 | 2.44839E-06 | 0.004155116 |
| 1697.119967 | 104.119176 | 2.34982E-06 | 0.003987935 |
| 1697.159967 | 97.183536  | 2.1933E-06  | 0.003722376 |
| 1697.199967 | 97.144058  | 2.19241E-06 | 0.003720952 |
| 1697.239967 | 105.056692 | 2.37098E-06 | 0.004024127 |
| 1697.279967 | 124.080883 | 2.80033E-06 | 0.004752949 |
| 1697.319967 | 138.095093 | 3.11661E-06 | 0.005289891 |
| 1697.359967 | 118.790031 | 2.68093E-06 | 0.004550496 |
| 1697.399967 | 108.0538   | 2.43862E-06 | 0.00413932  |
| 1697.439967 | 114.113635 | 2.57539E-06 | 0.004371563 |

|             |            |             |             |
|-------------|------------|-------------|-------------|
| 1697.479967 | 123.903321 | 2.79633E-06 | 0.004746706 |
| 1697.519967 | 127.76086  | 2.88338E-06 | 0.004894603 |
| 1697.559967 | 113.737763 | 2.5669E-06  | 0.004357472 |
| 1697.599967 | 105.582149 | 2.38284E-06 | 0.004045113 |
| 1697.639967 | 91.690322  | 2.06932E-06 | 0.003512965 |
| 1697.679967 | 87.329334  | 1.9709E-06  | 0.00334596  |
| 1697.719967 | 113.064193 | 2.5517E-06  | 0.004332074 |
| 1697.759967 | 126.742844 | 2.86041E-06 | 0.004856289 |
| 1697.799967 | 120.241267 | 2.71368E-06 | 0.004607282 |
| 1697.839967 | 106.462608 | 2.40271E-06 | 0.004079422 |
| 1697.879967 | 106.968414 | 2.41413E-06 | 0.0040989   |
| 1697.919967 | 114.436218 | 2.58267E-06 | 0.00438516  |
| 1697.959967 | 117.876794 | 2.66032E-06 | 0.004517108 |
| 1697.999967 | 107.869864 | 2.43447E-06 | 0.004133734 |
| 1698.039967 | 98.034487  | 2.2125E-06  | 0.003756917 |
| 1698.079967 | 101.012079 | 2.2797E-06  | 0.003871116 |
| 1698.119967 | 119.600567 | 2.69922E-06 | 0.004583596 |
| 1698.159967 | 125.86616  | 2.84062E-06 | 0.004823834 |
| 1698.199967 | 125.032558 | 2.82181E-06 | 0.004791999 |
| 1698.239967 | 128.020603 | 2.88925E-06 | 0.004906634 |
| 1698.279967 | 134.509421 | 3.03569E-06 | 0.005155452 |
| 1698.319967 | 138.330961 | 3.12194E-06 | 0.005302048 |
| 1698.359967 | 118.956758 | 2.68469E-06 | 0.004559567 |
| 1698.399967 | 111.887849 | 2.52515E-06 | 0.00428872  |
| 1698.439967 | 122.726316 | 2.76976E-06 | 0.004704274 |
| 1698.479967 | 131.664019 | 2.97147E-06 | 0.005046988 |
| 1698.519967 | 129.007819 | 2.91153E-06 | 0.004945286 |
| 1698.559967 | 113.299732 | 2.55702E-06 | 0.004343247 |
| 1698.599967 | 107.777441 | 2.43239E-06 | 0.004131652 |
| 1698.639967 | 121.093056 | 2.7329E-06  | 0.004642216 |
| 1698.679967 | 118.954818 | 2.68464E-06 | 0.004560352 |
| 1698.719967 | 112.790947 | 2.54553E-06 | 0.00432415  |
| 1698.759967 | 114.896492 | 2.59305E-06 | 0.004404976 |
| 1698.799966 | 119.677757 | 2.70096E-06 | 0.004588391 |
| 1698.839966 | 105.069476 | 2.37127E-06 | 0.004028411 |
| 1698.879966 | 101.214013 | 2.28426E-06 | 0.003880682 |
| 1698.919966 | 109.403961 | 2.4691E-06  | 0.004194795 |
| 1698.959966 | 116.072484 | 2.61959E-06 | 0.004450586 |
| 1698.999966 | 105.69257  | 2.38533E-06 | 0.004052683 |
| 1699.039966 | 119.027728 | 2.68629E-06 | 0.004564114 |
| 1699.079966 | 126.546732 | 2.85598E-06 | 0.004852544 |
| 1699.119966 | 116.635448 | 2.6323E-06  | 0.004472593 |
| 1699.159966 | 108.444479 | 2.44744E-06 | 0.004158593 |
| 1699.199966 | 110.382382 | 2.49118E-06 | 0.004233007 |
| 1699.239966 | 106.108361 | 2.39472E-06 | 0.0040692   |
| 1699.279966 | 101.420691 | 2.28892E-06 | 0.003889522 |

|             |            |             |             |
|-------------|------------|-------------|-------------|
| 1699.319966 | 106.212372 | 2.39707E-06 | 0.004073381 |
| 1699.359966 | 115.754974 | 2.61243E-06 | 0.004439456 |
| 1699.399966 | 113.07031  | 2.55184E-06 | 0.004336596 |
| 1699.439966 | 117.05366  | 2.64174E-06 | 0.004489475 |
| 1699.479966 | 125.22288  | 2.82611E-06 | 0.00480291  |
| 1699.519966 | 112.054092 | 2.5289E-06  | 0.004297924 |
| 1699.559966 | 106.410723 | 2.40154E-06 | 0.004081564 |
| 1699.599966 | 113.92737  | 2.57118E-06 | 0.004369981 |
| 1699.639966 | 112.069887 | 2.52926E-06 | 0.004298834 |
| 1699.679966 | 107.318538 | 2.42203E-06 | 0.004116676 |
| 1699.719966 | 108.868875 | 2.45702E-06 | 0.004176244 |
| 1699.759966 | 99.159899  | 2.2379E-06  | 0.003803894 |
| 1699.799966 | 100.589428 | 2.27016E-06 | 0.003858823 |
| 1699.839966 | 100.519963 | 2.2686E-06  | 0.003856249 |
| 1699.879966 | 112.022317 | 2.52819E-06 | 0.004297616 |
| 1699.919966 | 121.349552 | 2.73869E-06 | 0.004655554 |
| 1699.959966 | 112.104222 | 2.53004E-06 | 0.00430096  |
| 1699.999966 | 102.833022 | 2.3208E-06  | 0.003945357 |
| 1700.039966 | 109.65436  | 2.47475E-06 | 0.004207167 |
| 1700.079966 | 121.093141 | 2.7329E-06  | 0.004646155 |
| 1700.119966 | 114.492089 | 2.58393E-06 | 0.004392986 |
| 1700.159966 | 114.769199 | 2.59018E-06 | 0.004403722 |
| 1700.199966 | 125.103877 | 2.82342E-06 | 0.004800379 |
| 1700.239966 | 124.164066 | 2.80221E-06 | 0.004764429 |
| 1700.279966 | 114.905357 | 2.59325E-06 | 0.004409258 |
| 1700.319966 | 121.768355 | 2.74814E-06 | 0.004672721 |
| 1700.359966 | 137.582651 | 3.10505E-06 | 0.005279701 |
| 1700.399966 | 150.581731 | 3.39842E-06 | 0.005778673 |
| 1700.439966 | 135.535364 | 3.05884E-06 | 0.005201381 |
| 1700.479966 | 117.414547 | 2.64988E-06 | 0.004506073 |
| 1700.519966 | 116.683817 | 2.63339E-06 | 0.004478134 |
| 1700.559966 | 121.915417 | 2.75146E-06 | 0.004679025 |
| 1700.599966 | 126.771635 | 2.86106E-06 | 0.004865517 |
| 1700.639966 | 128.595441 | 2.90222E-06 | 0.004935631 |
| 1700.679966 | 120.398143 | 2.71722E-06 | 0.004621119 |
| 1700.719966 | 117.129339 | 2.64345E-06 | 0.004495761 |
| 1700.759966 | 114.660817 | 2.58773E-06 | 0.004401116 |
| 1700.799966 | 106.087523 | 2.39425E-06 | 0.004072136 |
| 1700.839966 | 103.000328 | 2.32457E-06 | 0.003953728 |
| 1700.879966 | 105.256317 | 2.37549E-06 | 0.004040421 |
| 1700.919966 | 110.610316 | 2.49632E-06 | 0.004246042 |
| 1700.959966 | 120.194277 | 2.71262E-06 | 0.004614054 |
| 1700.999966 | 130.414266 | 2.94327E-06 | 0.005006499 |
| 1701.039966 | 127.290914 | 2.87278E-06 | 0.004886711 |
| 1701.079966 | 124.903437 | 2.8189E-06  | 0.004795169 |
| 1701.119966 | 126.586235 | 2.85688E-06 | 0.004859887 |

|             |            |             |             |
|-------------|------------|-------------|-------------|
| 1701.159966 | 116.325119 | 2.6253E-06  | 0.004466048 |
| 1701.199966 | 108.61869  | 2.45137E-06 | 0.004170275 |
| 1701.239966 | 116.796485 | 2.63593E-06 | 0.004484356 |
| 1701.279966 | 129.319587 | 2.91856E-06 | 0.004965293 |
| 1701.319966 | 130.101159 | 2.9362E-06  | 0.004995419 |
| 1701.359966 | 130.681635 | 2.9493E-06  | 0.005017825 |
| 1701.399966 | 139.572605 | 3.14996E-06 | 0.005359341 |
| 1701.439966 | 141.022402 | 3.18268E-06 | 0.005415138 |
| 1701.479966 | 126.976409 | 2.86568E-06 | 0.004875898 |
| 1701.519966 | 115.253803 | 2.60112E-06 | 0.004425854 |
| 1701.559966 | 122.690507 | 2.76895E-06 | 0.004711541 |
| 1701.599966 | 113.185268 | 2.55443E-06 | 0.004346625 |
| 1701.639966 | 99.018778  | 2.23472E-06 | 0.003802682 |
| 1701.679966 | 104.382485 | 2.35577E-06 | 0.004008762 |
| 1701.719966 | 108.653024 | 2.45215E-06 | 0.004172868 |
| 1701.759966 | 99.588488  | 2.24757E-06 | 0.003824831 |
| 1701.799966 | 93.790719  | 2.11673E-06 | 0.003602244 |
| 1701.839966 | 84.474232  | 1.90647E-06 | 0.0032445   |
| 1701.879966 | 81.678511  | 1.84337E-06 | 0.003137195 |
| 1701.919966 | 101.003903 | 2.27952E-06 | 0.003879556 |
| 1701.959966 | 122.127598 | 2.75625E-06 | 0.004691027 |
| 1701.999966 | 129.760788 | 2.92852E-06 | 0.004984341 |
| 1702.039966 | 118.026339 | 2.66369E-06 | 0.004533707 |
| 1702.079966 | 128.672337 | 2.90396E-06 | 0.004942764 |
| 1702.119966 | 153.555917 | 3.46554E-06 | 0.00589877  |
| 1702.159966 | 148.13274  | 3.34315E-06 | 0.005690575 |
| 1702.199966 | 134.44291  | 3.03419E-06 | 0.005164797 |
| 1702.239966 | 113.688398 | 2.56579E-06 | 0.004367588 |
| 1702.279966 | 101.392659 | 2.28829E-06 | 0.003895312 |
| 1702.319966 | 106.896457 | 2.4125E-06  | 0.004106854 |
| 1702.359966 | 115.308018 | 2.60234E-06 | 0.004430122 |
| 1702.399966 | 126.83316  | 2.86245E-06 | 0.004873031 |
| 1702.439966 | 116.319537 | 2.62517E-06 | 0.004469194 |
| 1702.479966 | 103.565436 | 2.33733E-06 | 0.003979253 |
| 1702.519966 | 102.37232  | 2.3104E-06  | 0.003933503 |
| 1702.559966 | 122.100534 | 2.75564E-06 | 0.004691641 |
| 1702.599966 | 137.173722 | 3.09582E-06 | 0.005270943 |
| 1702.639966 | 133.484668 | 3.01256E-06 | 0.00512931  |
| 1702.679966 | 118.883293 | 2.68303E-06 | 0.004568342 |
| 1702.719966 | 99.44955   | 2.24444E-06 | 0.003821649 |
| 1702.759966 | 102.337941 | 2.30962E-06 | 0.003932737 |
| 1702.799966 | 110.863926 | 2.50204E-06 | 0.004260481 |
| 1702.839966 | 109.271863 | 2.46611E-06 | 0.004199397 |
| 1702.879966 | 97.216845  | 2.19405E-06 | 0.003736202 |
| 1702.919966 | 94.112593  | 2.12399E-06 | 0.003616985 |
| 1702.959966 | 102.414982 | 2.31136E-06 | 0.003936159 |

|             |            |             |             |
|-------------|------------|-------------|-------------|
| 1702.999966 | 104.737891 | 2.36379E-06 | 0.004025531 |
| 1703.039966 | 106.163445 | 2.39596E-06 | 0.004080417 |
| 1703.079966 | 99.915814  | 2.25496E-06 | 0.003840378 |
| 1703.119966 | 106.977767 | 2.41434E-06 | 0.004111909 |
| 1703.159966 | 129.040935 | 2.91227E-06 | 0.004960069 |
| 1703.199966 | 148.062898 | 3.34157E-06 | 0.005691368 |
| 1703.239966 | 145.942799 | 3.29373E-06 | 0.005610005 |
| 1703.279966 | 131.592674 | 2.96986E-06 | 0.005058509 |
| 1703.319966 | 117.892466 | 2.66067E-06 | 0.00453197  |
| 1703.359966 | 126.385011 | 2.85233E-06 | 0.004858551 |
| 1703.399966 | 136.996624 | 3.09182E-06 | 0.005266611 |
| 1703.439966 | 135.007652 | 3.04693E-06 | 0.00519027  |
| 1703.479966 | 126.322441 | 2.85092E-06 | 0.004856488 |
| 1703.519966 | 122.490829 | 2.76445E-06 | 0.004709291 |
| 1703.559966 | 118.11506  | 2.66569E-06 | 0.004541167 |
| 1703.599966 | 111.111585 | 2.50763E-06 | 0.004272005 |
| 1703.639966 | 101.681182 | 2.2948E-06  | 0.003909518 |
| 1703.679966 | 108.45664  | 2.44772E-06 | 0.004170124 |
| 1703.719966 | 103.085775 | 2.3265E-06  | 0.003963709 |
| 1703.759966 | 90.757118  | 2.04826E-06 | 0.003489746 |
| 1703.799966 | 79.844278  | 1.80197E-06 | 0.003070203 |
| 1703.839966 | 79.77466   | 1.8004E-06  | 0.003067599 |
| 1703.879966 | 89.865343  | 2.02814E-06 | 0.0034557   |
| 1703.919966 | 111.806395 | 2.52331E-06 | 0.004299526 |
| 1703.959966 | 123.124022 | 2.77874E-06 | 0.004734858 |
| 1703.999966 | 126.578651 | 2.8567E-06  | 0.004867823 |
| 1704.039966 | 136.746215 | 3.08617E-06 | 0.00525896  |
| 1704.079966 | 135.431407 | 3.0565E-06  | 0.005208517 |
| 1704.119966 | 107.669247 | 2.42994E-06 | 0.004140918 |
| 1704.159966 | 85.386623  | 1.92706E-06 | 0.003284014 |
| 1704.199966 | 94.817686  | 2.1399E-06  | 0.003646823 |
| 1704.239966 | 117.23226  | 2.64577E-06 | 0.004509025 |
| 1704.279966 | 119.273063 | 2.69183E-06 | 0.004587627 |
| 1704.319966 | 114.639973 | 2.58726E-06 | 0.004409527 |
| 1704.359966 | 112.655751 | 2.54248E-06 | 0.004333307 |
| 1704.399966 | 118.312807 | 2.67016E-06 | 0.004551013 |
| 1704.439966 | 110.507603 | 2.494E-06   | 0.004250878 |
| 1704.479966 | 97.259766  | 2.19502E-06 | 0.003741363 |
| 1704.519966 | 85.632595  | 1.93261E-06 | 0.00329417  |
| 1704.559966 | 86.386056  | 1.94961E-06 | 0.003323232 |
| 1704.599966 | 89.924254  | 2.02947E-06 | 0.003459426 |
| 1704.639966 | 95.273247  | 2.15018E-06 | 0.00366529  |
| 1704.679966 | 107.727983 | 2.43127E-06 | 0.004144538 |
| 1704.719966 | 116.996998 | 2.64046E-06 | 0.004501244 |
| 1704.759966 | 112.476566 | 2.53844E-06 | 0.00432743  |
| 1704.799966 | 116.303365 | 2.6248E-06  | 0.004474767 |

|             |            |             |             |
|-------------|------------|-------------|-------------|
| 1704.839966 | 115.60014  | 2.60893E-06 | 0.004447815 |
| 1704.879966 | 113.103729 | 2.55259E-06 | 0.004351866 |
| 1704.919966 | 132.669737 | 2.99417E-06 | 0.005104822 |
| 1704.959966 | 142.244404 | 3.21026E-06 | 0.005473361 |
| 1704.999966 | 136.685042 | 3.08479E-06 | 0.005259569 |
| 1705.039966 | 129.181902 | 2.91546E-06 | 0.004970968 |
| 1705.079966 | 116.687597 | 2.63348E-06 | 0.004490288 |
| 1705.119966 | 109.411997 | 2.46928E-06 | 0.004210412 |
| 1705.159966 | 93.565369  | 2.11164E-06 | 0.003600684 |
| 1705.199966 | 92.112205  | 2.07884E-06 | 0.003544845 |
| 1705.239966 | 112.975391 | 2.5497E-06  | 0.004347846 |
| 1705.279966 | 142.218665 | 3.20968E-06 | 0.005473398 |
| 1705.319966 | 157.490255 | 3.55434E-06 | 0.00606128  |
| 1705.359966 | 159.502384 | 3.59975E-06 | 0.006138864 |
| 1705.399966 | 146.197553 | 3.29948E-06 | 0.005626925 |
| 1705.439966 | 128.875636 | 2.90854E-06 | 0.004960346 |
| 1705.479966 | 115.68389  | 2.61082E-06 | 0.004452708 |
| 1705.519966 | 86.24832   | 1.9465E-06  | 0.003319802 |
| 1705.559966 | 75.024891  | 1.69321E-06 | 0.002887867 |
| 1705.599966 | 87.859388  | 1.98286E-06 | 0.003381973 |
| 1705.639966 | 97.806623  | 2.20736E-06 | 0.00376496  |
| 1705.679966 | 108.148951 | 2.44077E-06 | 0.004163175 |
| 1705.719966 | 104.659746 | 2.36202E-06 | 0.004028953 |
| 1705.759966 | 93.742614  | 2.11564E-06 | 0.003608774 |
| 1705.799966 | 101.814661 | 2.29782E-06 | 0.003919613 |
| 1705.839966 | 105.774289 | 2.38718E-06 | 0.004072144 |
| 1705.879966 | 110.96595  | 2.50435E-06 | 0.004272115 |
| 1705.919966 | 122.189695 | 2.75765E-06 | 0.004704332 |
| 1705.959966 | 110.704592 | 2.49845E-06 | 0.004262253 |
| 1705.999966 | 107.342885 | 2.42258E-06 | 0.00413292  |
| 1706.039966 | 120.864716 | 2.72775E-06 | 0.004653648 |
| 1706.079966 | 121.285447 | 2.73724E-06 | 0.004669956 |
| 1706.119966 | 118.956263 | 2.68468E-06 | 0.004580381 |
| 1706.159966 | 132.260283 | 2.98493E-06 | 0.005092769 |
| 1706.199966 | 134.08202  | 3.02604E-06 | 0.005163037 |
| 1706.239966 | 124.348509 | 2.80637E-06 | 0.004788345 |
| 1706.279966 | 121.852486 | 2.75004E-06 | 0.00469234  |
| 1706.319966 | 112.584208 | 2.54087E-06 | 0.004335535 |
| 1706.359966 | 100.461889 | 2.26728E-06 | 0.003868804 |
| 1706.399966 | 108.016816 | 2.43779E-06 | 0.004159843 |
| 1706.439966 | 116.077446 | 2.61971E-06 | 0.004470371 |
| 1706.479966 | 135.332431 | 3.05426E-06 | 0.005212041 |
| 1706.519966 | 142.579893 | 3.21783E-06 | 0.00549129  |
| 1706.559966 | 136.705628 | 3.08526E-06 | 0.005265174 |
| 1706.599966 | 121.439379 | 2.74072E-06 | 0.004677309 |
| 1706.639966 | 104.663232 | 2.3621E-06  | 0.00403126  |

|             |            |             |             |
|-------------|------------|-------------|-------------|
| 1706.679966 | 89.050001  | 2.00973E-06 | 0.003429974 |
| 1706.719966 | 88.363697  | 1.99425E-06 | 0.003403619 |
| 1706.759966 | 90.211237  | 2.03594E-06 | 0.003474864 |
| 1706.799966 | 96.066446  | 2.16809E-06 | 0.003700489 |
| 1706.839966 | 105.374204 | 2.37815E-06 | 0.00405912  |
| 1706.879966 | 115.98465  | 2.61761E-06 | 0.004467949 |
| 1706.919966 | 107.9632   | 2.43658E-06 | 0.004159045 |
| 1706.959966 | 93.614482  | 2.11275E-06 | 0.003606377 |
| 1706.999966 | 92.552614  | 2.08878E-06 | 0.003565554 |
| 1707.039966 | 101.055876 | 2.28069E-06 | 0.00389323  |
| 1707.079966 | 111.33455  | 2.51267E-06 | 0.004289321 |
| 1707.119966 | 122.459262 | 2.76373E-06 | 0.004718027 |
| 1707.159966 | 125.577282 | 2.8341E-06  | 0.004838269 |
| 1707.199966 | 120.429113 | 2.71792E-06 | 0.004640028 |
| 1707.239966 | 110.755883 | 2.49961E-06 | 0.004267427 |
| 1707.279966 | 99.547826  | 2.24666E-06 | 0.00383567  |
| 1707.319966 | 107.081367 | 2.41668E-06 | 0.004126041 |
| 1707.359966 | 119.428294 | 2.69533E-06 | 0.004601899 |
| 1707.399966 | 118.370881 | 2.67147E-06 | 0.004561261 |
| 1707.439966 | 113.967411 | 2.57209E-06 | 0.004391682 |
| 1707.479966 | 114.772572 | 2.59026E-06 | 0.004422812 |
| 1707.519966 | 117.415019 | 2.64989E-06 | 0.004524746 |
| 1707.559966 | 106.590603 | 2.4056E-06  | 0.004107709 |
| 1707.599966 | 96.449302  | 2.17673E-06 | 0.003716978 |
| 1707.639966 | 97.074429  | 2.19083E-06 | 0.003741157 |
| 1707.679966 | 106.13183  | 2.39525E-06 | 0.004090316 |
| 1707.719966 | 111.910054 | 2.52565E-06 | 0.00431311  |
| 1707.759966 | 98.412509  | 2.22103E-06 | 0.003792992 |
| 1707.799966 | 79.481168  | 1.79378E-06 | 0.003063416 |
| 1707.839966 | 88.583339  | 1.9992E-06  | 0.003414318 |
| 1707.879966 | 102.254637 | 2.30774E-06 | 0.003941351 |
| 1707.919966 | 115.642372 | 2.60989E-06 | 0.004457479 |
| 1707.959966 | 116.013213 | 2.61826E-06 | 0.004471877 |
| 1707.999966 | 119.918589 | 2.7064E-06  | 0.004622523 |
| 1708.039966 | 146.190583 | 3.29932E-06 | 0.005635367 |
| 1708.079966 | 134.114081 | 3.02677E-06 | 0.005169962 |
| 1708.119966 | 118.60735  | 2.6768E-06  | 0.0045723   |
| 1708.159966 | 104.263272 | 2.35308E-06 | 0.004019432 |
| 1708.199966 | 92.192079  | 2.08065E-06 | 0.003554161 |
| 1708.239966 | 103.554089 | 2.33707E-06 | 0.003992279 |
| 1708.279966 | 113.040992 | 2.55118E-06 | 0.004358126 |
| 1708.319966 | 112.81355  | 2.54604E-06 | 0.004349459 |
| 1708.359966 | 114.225206 | 2.5779E-06  | 0.004403988 |
| 1708.399966 | 110.194037 | 2.48693E-06 | 0.004248664 |
| 1708.439966 | 105.729975 | 2.38618E-06 | 0.004076642 |
| 1708.479966 | 115.606774 | 2.60908E-06 | 0.004457568 |



|             |            |             |             |
|-------------|------------|-------------|-------------|
| 1708.519966 | 118.572946 | 2.67603E-06 | 0.004572044 |
| 1708.559966 | 106.900958 | 2.41261E-06 | 0.004122082 |
| 1708.599966 | 103.280259 | 2.33089E-06 | 0.003982561 |
| 1708.639966 | 120.518544 | 2.71994E-06 | 0.004647391 |
| 1708.679966 | 122.711053 | 2.76942E-06 | 0.004732048 |
| 1708.719966 | 109.981565 | 2.48213E-06 | 0.004241266 |
| 1708.759966 | 113.788633 | 2.56805E-06 | 0.004388183 |
| 1708.799966 | 133.721504 | 3.01791E-06 | 0.005157001 |
| 1708.839966 | 149.773314 | 3.38018E-06 | 0.005776178 |
| 1708.879966 | 136.898852 | 3.08962E-06 | 0.005279784 |
| 1708.919966 | 128.205474 | 2.89342E-06 | 0.004944621 |
| 1708.959966 | 133.150264 | 3.00502E-06 | 0.005135452 |
| 1708.999966 | 122.491145 | 2.76445E-06 | 0.004724453 |
| 1709.039966 | 115.001634 | 2.59543E-06 | 0.004435688 |
| 1709.079966 | 108.00536  | 2.43753E-06 | 0.004165935 |
| 1709.119966 | 111.368252 | 2.51343E-06 | 0.004295747 |
| 1709.159966 | 132.706627 | 2.995E-06   | 0.00511894  |
| 1709.199966 | 152.084318 | 3.43233E-06 | 0.00586654  |
| 1709.239966 | 146.55596  | 3.30756E-06 | 0.00565342  |
| 1709.279966 | 145.002032 | 3.27249E-06 | 0.005593608 |
| 1709.319966 | 137.936287 | 3.11303E-06 | 0.005321164 |
| 1709.359966 | 133.397073 | 3.01059E-06 | 0.005146175 |
| 1709.399966 | 150.365289 | 3.39354E-06 | 0.005800909 |
| 1709.439966 | 140.700897 | 3.17542E-06 | 0.005428195 |
| 1709.479966 | 124.893678 | 2.81868E-06 | 0.004818471 |
| 1709.519966 | 110.888635 | 2.5026E-06  | 0.004278248 |
| 1709.559966 | 96.792636  | 2.18447E-06 | 0.003734491 |
| 1709.599966 | 105.821292 | 2.38824E-06 | 0.004082934 |
| 1709.639966 | 117.601112 | 2.65409E-06 | 0.004537544 |
| 1709.679966 | 114.111544 | 2.57534E-06 | 0.004403005 |
| 1709.719966 | 98.173724  | 2.21564E-06 | 0.003788131 |
| 1709.759966 | 94.346939  | 2.12928E-06 | 0.003640556 |
| 1709.799966 | 104.461764 | 2.35756E-06 | 0.00403095  |
| 1709.839966 | 108.014678 | 2.43774E-06 | 0.004168147 |
| 1709.879966 | 117.692705 | 2.65616E-06 | 0.004541715 |
| 1709.919966 | 119.75953  | 2.70281E-06 | 0.004621582 |
| 1709.959966 | 120.315324 | 2.71535E-06 | 0.004643139 |
| 1709.999966 | 102.366129 | 2.31026E-06 | 0.003950546 |
| 1710.039966 | 94.027524  | 2.12207E-06 | 0.003628825 |
| 1710.079966 | 98.548016  | 2.22409E-06 | 0.003803374 |
| 1710.119966 | 102.342468 | 2.30973E-06 | 0.00394991  |
| 1710.159966 | 114.416463 | 2.58222E-06 | 0.00441601  |
| 1710.199966 | 137.330694 | 3.09936E-06 | 0.00530053  |
| 1710.239966 | 129.388457 | 2.92012E-06 | 0.004994101 |
| 1710.279966 | 116.02205  | 2.61846E-06 | 0.004478293 |
| 1710.319966 | 115.515981 | 2.60703E-06 | 0.004458864 |

|             |            |             |             |
|-------------|------------|-------------|-------------|
| 1710.359966 | 138.872097 | 3.13415E-06 | 0.005360524 |
| 1710.399966 | 154.134143 | 3.47859E-06 | 0.005949785 |
| 1710.439966 | 141.052879 | 3.18337E-06 | 0.005444958 |
| 1710.479966 | 131.304156 | 2.96335E-06 | 0.005068754 |
| 1710.519966 | 123.404373 | 2.78506E-06 | 0.004763909 |
| 1710.559966 | 106.590155 | 2.40559E-06 | 0.004114908 |
| 1710.599966 | 96.149619  | 2.16996E-06 | 0.003711939 |
| 1710.639966 | 108.766057 | 2.4547E-06  | 0.004199105 |
| 1710.679966 | 120.804103 | 2.72638E-06 | 0.004663964 |
| 1710.719966 | 120.995309 | 2.7307E-06  | 0.004671455 |
| 1710.759966 | 112.615877 | 2.54158E-06 | 0.004348039 |
| 1710.799966 | 103.642675 | 2.33907E-06 | 0.004001682 |
| 1710.839966 | 94.826925  | 2.14011E-06 | 0.003661388 |
| 1710.879966 | 93.95455   | 2.12042E-06 | 0.00362779  |
| 1710.919966 | 102.56757  | 2.31481E-06 | 0.00396045  |
| 1710.959966 | 110.544779 | 2.49484E-06 | 0.004268574 |
| 1710.999966 | 121.397256 | 2.73977E-06 | 0.004687741 |
| 1711.039966 | 118.132311 | 2.66608E-06 | 0.004561772 |
| 1711.079966 | 117.597563 | 2.65401E-06 | 0.004541229 |
| 1711.119966 | 120.810979 | 2.72654E-06 | 0.004665429 |
| 1711.159966 | 125.38588  | 2.82978E-06 | 0.004842214 |
| 1711.199966 | 125.781233 | 2.83871E-06 | 0.004857596 |
| 1711.239966 | 112.779046 | 2.54527E-06 | 0.004355561 |
| 1711.279966 | 124.777998 | 2.81607E-06 | 0.004819077 |
| 1711.319966 | 155.544917 | 3.51043E-06 | 0.006007473 |
| 1711.359966 | 153.882308 | 3.47291E-06 | 0.005943398 |
| 1711.399966 | 153.337554 | 3.46062E-06 | 0.005922496 |
| 1711.439966 | 173.471894 | 3.91502E-06 | 0.00670032  |
| 1711.479966 | 162.282698 | 3.66249E-06 | 0.006268286 |
| 1711.519966 | 133.639603 | 3.01606E-06 | 0.005162046 |
| 1711.559966 | 131.949252 | 2.97791E-06 | 0.005096873 |
| 1711.599966 | 130.374034 | 2.94236E-06 | 0.005036144 |
| 1711.639966 | 119.657017 | 2.70049E-06 | 0.00462227  |
| 1711.679966 | 97.911763  | 2.20973E-06 | 0.003782354 |
| 1711.719966 | 99.839825  | 2.25325E-06 | 0.003856926 |
| 1711.759966 | 120.555235 | 2.72076E-06 | 0.004657294 |
| 1711.799966 | 146.080844 | 3.29684E-06 | 0.005643533 |
| 1711.839966 | 139.957071 | 3.15864E-06 | 0.00540708  |
| 1711.879966 | 114.655795 | 2.58762E-06 | 0.004429698 |
| 1711.919966 | 114.975681 | 2.59484E-06 | 0.00444216  |
| 1711.959966 | 125.955219 | 2.84263E-06 | 0.004866475 |
| 1711.999966 | 127.139534 | 2.86936E-06 | 0.004912348 |
| 1712.039966 | 117.061959 | 2.64193E-06 | 0.004523082 |
| 1712.079966 | 101.577625 | 2.29247E-06 | 0.003924884 |
| 1712.119966 | 85.884432  | 1.93829E-06 | 0.003318588 |
| 1712.159966 | 80.418522  | 1.81493E-06 | 0.003107457 |

|             |            |             |             |
|-------------|------------|-------------|-------------|
| 1712.199966 | 98.895765  | 2.23194E-06 | 0.003821527 |
| 1712.239966 | 133.06     | 3.00298E-06 | 0.00514182  |
| 1712.279966 | 149.23371  | 3.368E-06   | 0.005766954 |
| 1712.319966 | 154.226542 | 3.48068E-06 | 0.005960035 |
| 1712.359966 | 158.565629 | 3.57861E-06 | 0.006127861 |
| 1712.399966 | 154.562493 | 3.48826E-06 | 0.005973297 |
| 1712.439966 | 151.911386 | 3.42843E-06 | 0.005870978 |
| 1712.479966 | 152.456701 | 3.44074E-06 | 0.00589219  |
| 1712.519966 | 138.637605 | 3.12886E-06 | 0.005358231 |
| 1712.559966 | 114.604824 | 2.58647E-06 | 0.004429487 |
| 1712.599966 | 95.790152  | 2.16185E-06 | 0.003702385 |
| 1712.639966 | 87.025277  | 1.96404E-06 | 0.003363692 |
| 1712.679966 | 94.779646  | 2.13904E-06 | 0.003663499 |
| 1712.719966 | 99.039759  | 2.23519E-06 | 0.003828254 |
| 1712.759966 | 98.918913  | 2.23246E-06 | 0.003823672 |
| 1712.799966 | 104.310025 | 2.35413E-06 | 0.004032157 |
| 1712.839966 | 103.469342 | 2.33516E-06 | 0.003999754 |
| 1712.879966 | 118.006808 | 2.66325E-06 | 0.004561826 |
| 1712.919966 | 148.032512 | 3.34089E-06 | 0.005722673 |
| 1712.959966 | 163.131475 | 3.68165E-06 | 0.006306519 |
| 1712.999966 | 154.826092 | 3.49421E-06 | 0.00598558  |
| 1713.039966 | 130.385754 | 2.94262E-06 | 0.005040834 |
| 1713.079966 | 113.414637 | 2.55961E-06 | 0.004384817 |
| 1713.119966 | 101.555911 | 2.29198E-06 | 0.003926429 |
| 1713.159966 | 99.498311  | 2.24554E-06 | 0.003846966 |
| 1713.199966 | 91.632587  | 2.06802E-06 | 0.003542932 |
| 1713.239966 | 94.025899  | 2.12203E-06 | 0.003635553 |
| 1713.279966 | 106.663286 | 2.40724E-06 | 0.004124279 |
| 1713.319966 | 114.27929  | 2.57912E-06 | 0.004418865 |
| 1713.359966 | 128.954889 | 2.91033E-06 | 0.004986447 |
| 1713.399966 | 136.377894 | 3.07786E-06 | 0.005273604 |
| 1713.439966 | 135.520214 | 3.0585E-06  | 0.00524056  |
| 1713.479966 | 127.384009 | 2.87488E-06 | 0.004926049 |
| 1713.519966 | 106.788843 | 2.41008E-06 | 0.004129712 |
| 1713.559966 | 90.321174  | 2.03842E-06 | 0.00349296  |
| 1713.599966 | 97.352867  | 2.19712E-06 | 0.003764982 |
| 1713.639966 | 100.644879 | 2.27141E-06 | 0.003892387 |
| 1713.679966 | 91.402152  | 2.06282E-06 | 0.003535012 |
| 1713.719966 | 95.058234  | 2.14533E-06 | 0.003676498 |
| 1713.759966 | 106.843515 | 2.41131E-06 | 0.004132405 |
| 1713.799966 | 109.808981 | 2.47824E-06 | 0.0042472   |
| 1713.839966 | 106.151119 | 2.39568E-06 | 0.004105817 |
| 1713.879966 | 104.97193  | 2.36907E-06 | 0.004060302 |
| 1713.919966 | 111.115276 | 2.50772E-06 | 0.004298026 |
| 1713.959966 | 118.701962 | 2.67894E-06 | 0.004591592 |
| 1713.999966 | 112.36964  | 2.53603E-06 | 0.004346749 |

|             |            |             |             |
|-------------|------------|-------------|-------------|
| 1714.039966 | 96.334474  | 2.17413E-06 | 0.003726554 |
| 1714.079966 | 92.036955  | 2.07715E-06 | 0.003560394 |
| 1714.119966 | 104.885626 | 2.36712E-06 | 0.004057532 |
| 1714.159966 | 115.692062 | 2.61101E-06 | 0.004475687 |
| 1714.199966 | 114.564306 | 2.58556E-06 | 0.004432161 |
| 1714.239966 | 119.85422  | 2.70494E-06 | 0.004636921 |
| 1714.279966 | 107.110429 | 2.41733E-06 | 0.004143986 |
| 1714.319966 | 89.915257  | 2.02926E-06 | 0.003478805 |
| 1714.359966 | 94.164113  | 2.12515E-06 | 0.003643277 |
| 1714.399966 | 105.262816 | 2.37564E-06 | 0.004072789 |
| 1714.439966 | 111.342004 | 2.51283E-06 | 0.004308103 |
| 1714.479966 | 121.673947 | 2.74601E-06 | 0.004707982 |
| 1714.519966 | 117.109415 | 2.643E-06   | 0.00453147  |
| 1714.559966 | 102.555244 | 2.31453E-06 | 0.003968399 |
| 1714.599966 | 95.376284  | 2.15251E-06 | 0.003690693 |
| 1714.639966 | 82.389538  | 1.85942E-06 | 0.003188231 |
| 1714.679966 | 79.651855  | 1.79763E-06 | 0.003082363 |
| 1714.719966 | 86.930134  | 1.96189E-06 | 0.003364095 |
| 1714.759966 | 92.421668  | 2.08583E-06 | 0.003576695 |
| 1714.799966 | 96.195166  | 2.17099E-06 | 0.003722815 |
| 1714.839966 | 116.886397 | 2.63796E-06 | 0.004523685 |
| 1714.879966 | 132.082574 | 2.98092E-06 | 0.00511192  |
| 1714.919966 | 124.233215 | 2.80377E-06 | 0.004808242 |
| 1714.959966 | 114.545327 | 2.58513E-06 | 0.004433392 |
| 1714.999966 | 116.993361 | 2.64038E-06 | 0.004528247 |
| 1715.039966 | 106.141026 | 2.39546E-06 | 0.004108301 |
| 1715.079966 | 93.840856  | 2.11786E-06 | 0.003632295 |
| 1715.119966 | 89.298876  | 2.01535E-06 | 0.003456569 |
| 1715.159966 | 97.168712  | 2.19296E-06 | 0.003761281 |
| 1715.199966 | 119.382732 | 2.6943E-06  | 0.004621267 |
| 1715.239966 | 136.043175 | 3.0703E-06  | 0.00526631  |
| 1715.279966 | 151.318783 | 3.41505E-06 | 0.005857774 |
| 1715.319966 | 138.503742 | 3.12584E-06 | 0.00536181  |
| 1715.359966 | 110.760245 | 2.4997E-06  | 0.004287893 |
| 1715.399966 | 106.066004 | 2.39376E-06 | 0.004106259 |
| 1715.439966 | 103.411059 | 2.33384E-06 | 0.004003569 |
| 1715.479966 | 101.508174 | 2.2909E-06  | 0.00392999  |
| 1715.519966 | 107.629765 | 2.42905E-06 | 0.00416709  |
| 1715.559966 | 113.276211 | 2.55649E-06 | 0.004385806 |
| 1715.599966 | 104.201457 | 2.35168E-06 | 0.004034545 |
| 1715.639966 | 91.849704  | 2.07292E-06 | 0.003556384 |
| 1715.679966 | 96.960678  | 2.18827E-06 | 0.003754367 |
| 1715.719966 | 119.676989 | 2.70094E-06 | 0.004634062 |
| 1715.759966 | 131.543287 | 2.96875E-06 | 0.00509366  |
| 1715.799966 | 117.215066 | 2.64538E-06 | 0.004538944 |
| 1715.839966 | 104.5444   | 2.35942E-06 | 0.00404839  |

|             |            |             |             |
|-------------|------------|-------------|-------------|
| 1715.879966 | 104.574195 | 2.36009E-06 | 0.004049638 |
| 1715.919966 | 101.765999 | 2.29672E-06 | 0.003940982 |
| 1715.959966 | 99.980949  | 2.25643E-06 | 0.003871945 |
| 1715.999966 | 94.42436   | 2.13103E-06 | 0.003656841 |
| 1716.039966 | 91.282021  | 2.06011E-06 | 0.003535228 |
| 1716.079966 | 94.076205  | 2.12317E-06 | 0.003643528 |
| 1716.119966 | 94.079947  | 2.12325E-06 | 0.003643757 |
| 1716.159966 | 119.77009  | 2.70304E-06 | 0.004638856 |
| 1716.199966 | 129.33479  | 2.91891E-06 | 0.005009426 |
| 1716.239966 | 108.652185 | 2.45213E-06 | 0.004208441 |
| 1716.279966 | 106.261808 | 2.39818E-06 | 0.00411595  |
| 1716.319966 | 102.623819 | 2.31608E-06 | 0.003975129 |
| 1716.359966 | 95.903393  | 2.16441E-06 | 0.0037149   |
| 1716.399966 | 91.70683   | 2.0697E-06  | 0.003552425 |
| 1716.439966 | 102.888441 | 2.32205E-06 | 0.003985657 |
| 1716.479966 | 109.776192 | 2.4775E-06  | 0.004252572 |
| 1716.519966 | 105.938829 | 2.39089E-06 | 0.004104014 |
| 1716.559966 | 100.043263 | 2.25784E-06 | 0.003875713 |
| 1716.599966 | 102.006917 | 2.30215E-06 | 0.003951878 |
| 1716.639966 | 107.359126 | 2.42295E-06 | 0.004159326 |
| 1716.679966 | 109.402881 | 2.46907E-06 | 0.004238604 |
| 1716.719966 | 116.408057 | 2.62717E-06 | 0.004510111 |
| 1716.759966 | 116.03767  | 2.61881E-06 | 0.004495866 |
| 1716.799966 | 113.071806 | 2.55187E-06 | 0.004381056 |
| 1716.839966 | 101.181    | 2.28351E-06 | 0.003920429 |
| 1716.879966 | 85.360532  | 1.92647E-06 | 0.003307515 |
| 1716.919966 | 85.735101  | 1.93492E-06 | 0.003322106 |
| 1716.959966 | 85.685409  | 1.9338E-06  | 0.003320258 |
| 1716.999966 | 83.480096  | 1.88403E-06 | 0.003234879 |
| 1717.039966 | 90.444787  | 2.04121E-06 | 0.003504844 |
| 1717.079966 | 117.73874  | 2.6572E-06  | 0.004562624 |
| 1717.119966 | 125.616515 | 2.83499E-06 | 0.004868018 |
| 1717.159966 | 121.507147 | 2.74225E-06 | 0.004708877 |
| 1717.199966 | 118.988611 | 2.68541E-06 | 0.004611381 |
| 1717.239966 | 110.439831 | 2.49247E-06 | 0.004280175 |
| 1717.279966 | 109.687742 | 2.4755E-06  | 0.004251126 |
| 1717.319966 | 104.873265 | 2.36684E-06 | 0.004064628 |
| 1717.359966 | 110.861617 | 2.50199E-06 | 0.004296821 |
| 1717.399966 | 120.859475 | 2.72763E-06 | 0.004684432 |
| 1717.439966 | 126.312876 | 2.85071E-06 | 0.004895916 |
| 1717.479966 | 111.425064 | 2.51471E-06 | 0.004318961 |
| 1717.519966 | 107.699027 | 2.43062E-06 | 0.004174633 |
| 1717.559966 | 121.124806 | 2.73362E-06 | 0.004695153 |
| 1717.599966 | 97.808899  | 2.20741E-06 | 0.003791448 |
| 1717.639966 | 74.253103  | 1.67579E-06 | 0.002878402 |
| 1717.679966 | 103.25904  | 2.33041E-06 | 0.004002903 |

|             |            |             |             |
|-------------|------------|-------------|-------------|
| 1717.719966 | 136.144676 | 3.0726E-06  | 0.005277859 |
| 1717.759966 | 141.430412 | 3.19189E-06 | 0.005482896 |
| 1717.799966 | 134.853616 | 3.04346E-06 | 0.005228053 |
| 1717.839966 | 111.986138 | 2.52737E-06 | 0.004341619 |
| 1717.879966 | 85.718645  | 1.93455E-06 | 0.003323325 |
| 1717.919966 | 96.861302  | 2.18602E-06 | 0.003755415 |
| 1717.959966 | 105.885938 | 2.3897E-06  | 0.004105406 |
| 1717.999966 | 111.381263 | 2.51372E-06 | 0.004318571 |
| 1718.039966 | 109.759062 | 2.47711E-06 | 0.004255773 |
| 1718.079966 | 112.498718 | 2.53894E-06 | 0.004362101 |
| 1718.119966 | 103.811508 | 2.34288E-06 | 0.004025351 |
| 1718.159966 | 104.643274 | 2.36165E-06 | 0.004057698 |
| 1718.199966 | 113.77137  | 2.56766E-06 | 0.004411756 |
| 1718.239966 | 115.297202 | 2.6021E-06  | 0.004471027 |
| 1718.279966 | 111.389513 | 2.51391E-06 | 0.004319595 |
| 1718.319966 | 104.076131 | 2.34885E-06 | 0.004036082 |
| 1718.359966 | 98.266417  | 2.21774E-06 | 0.003810869 |
| 1718.399966 | 113.863032 | 2.56973E-06 | 0.004415824 |
| 1718.439966 | 121.129095 | 2.73371E-06 | 0.004697725 |
| 1718.479966 | 110.786824 | 2.5003E-06  | 0.004296723 |
| 1718.519966 | 102.658761 | 2.31687E-06 | 0.003981579 |
| 1718.559966 | 91.582072  | 2.06688E-06 | 0.003552057 |
| 1718.599966 | 89.096485  | 2.01078E-06 | 0.003455733 |
| 1718.639966 | 98.988378  | 2.23403E-06 | 0.003839493 |
| 1718.679966 | 100.131902 | 2.25984E-06 | 0.003883938 |
| 1718.719966 | 97.065607  | 2.19064E-06 | 0.003765089 |
| 1718.759966 | 100.887573 | 2.27689E-06 | 0.003913431 |
| 1718.799966 | 105.588153 | 2.38298E-06 | 0.004095862 |
| 1718.839966 | 110.263906 | 2.4885E-06  | 0.004277338 |
| 1718.879966 | 126.589679 | 2.85695E-06 | 0.004910759 |
| 1718.919966 | 133.589561 | 3.01493E-06 | 0.005182424 |
| 1718.959966 | 118.377392 | 2.67161E-06 | 0.004592396 |
| 1718.999966 | 110.52997  | 2.49451E-06 | 0.004288058 |
| 1719.039966 | 112.337126 | 2.53529E-06 | 0.004358269 |
| 1719.079966 | 111.353616 | 2.5131E-06  | 0.004320213 |
| 1719.119966 | 113.951455 | 2.57173E-06 | 0.004421105 |
| 1719.159966 | 121.054956 | 2.73204E-06 | 0.004696817 |
| 1719.199966 | 122.682572 | 2.76877E-06 | 0.004760077 |
| 1719.239966 | 126.732979 | 2.86019E-06 | 0.004917347 |
| 1719.279966 | 134.831731 | 3.04296E-06 | 0.005231708 |
| 1719.319966 | 129.43327  | 2.92113E-06 | 0.005022355 |
| 1719.359966 | 129.687986 | 2.92688E-06 | 0.005032355 |
| 1719.399966 | 115.8495   | 2.61456E-06 | 0.004495478 |
| 1719.439966 | 106.60383  | 2.4059E-06  | 0.004136801 |
| 1719.479966 | 101.221485 | 2.28443E-06 | 0.003928028 |
| 1719.519966 | 95.392747  | 2.15288E-06 | 0.003701923 |

|             |            |             |             |
|-------------|------------|-------------|-------------|
| 1719.559966 | 94.041388  | 2.12238E-06 | 0.003649565 |
| 1719.599966 | 95.43578   | 2.15385E-06 | 0.003703765 |
| 1719.639966 | 93.001213  | 2.09891E-06 | 0.003609366 |
| 1719.679966 | 103.14484  | 2.32784E-06 | 0.004003132 |
| 1719.719966 | 99.000097  | 2.23429E-06 | 0.003842361 |
| 1719.759966 | 96.737635  | 2.18323E-06 | 0.003754638 |
| 1719.799966 | 109.27866  | 2.46627E-06 | 0.004241486 |
| 1719.839966 | 114.316538 | 2.57997E-06 | 0.004437127 |
| 1719.879966 | 118.091869 | 2.66517E-06 | 0.004583771 |
| 1719.919966 | 115.911087 | 2.61595E-06 | 0.004499228 |
| 1719.959966 | 102.267666 | 2.30804E-06 | 0.003969734 |
| 1719.999966 | 100.94452  | 2.27818E-06 | 0.003918465 |
| 1720.039966 | 108.345818 | 2.44521E-06 | 0.004205866 |
| 1720.079966 | 99.086217  | 2.23624E-06 | 0.003846508 |
| 1720.119966 | 87.484291  | 1.9744E-06  | 0.003396202 |
| 1720.159966 | 111.521966 | 2.5169E-06  | 0.004329463 |
| 1720.199966 | 136.427541 | 3.07898E-06 | 0.005296461 |
| 1720.239966 | 133.939633 | 3.02283E-06 | 0.005199995 |
| 1720.279966 | 127.566448 | 2.879E-06   | 0.004952681 |
| 1720.319966 | 130.958226 | 2.95554E-06 | 0.005084483 |
| 1720.359966 | 135.529541 | 3.05871E-06 | 0.005262087 |
| 1720.399966 | 132.30927  | 2.98604E-06 | 0.005137176 |
| 1720.439966 | 131.952602 | 2.97799E-06 | 0.005123447 |
| 1720.479966 | 131.136212 | 2.95956E-06 | 0.005091867 |
| 1720.519966 | 125.313401 | 2.82815E-06 | 0.004865887 |
| 1720.559966 | 107.922468 | 2.43566E-06 | 0.004190699 |
| 1720.599966 | 103.660888 | 2.33948E-06 | 0.004025312 |
| 1720.639966 | 103.492695 | 2.33569E-06 | 0.004018875 |
| 1720.679966 | 101.518097 | 2.29112E-06 | 0.003942288 |
| 1720.719966 | 107.248421 | 2.42045E-06 | 0.004164912 |
| 1720.759966 | 110.686045 | 2.49803E-06 | 0.00429851  |
| 1720.799966 | 102.209585 | 2.30673E-06 | 0.003969417 |
| 1720.839966 | 111.077361 | 2.50686E-06 | 0.004313907 |
| 1720.879966 | 117.318651 | 2.64772E-06 | 0.004556406 |
| 1720.919966 | 119.812422 | 2.704E-06   | 0.004653367 |
| 1720.959966 | 119.441724 | 2.69563E-06 | 0.004639077 |
| 1720.999966 | 131.174301 | 2.96042E-06 | 0.005094885 |
| 1721.039966 | 131.613125 | 2.97032E-06 | 0.005112048 |
| 1721.079966 | 122.093601 | 2.75548E-06 | 0.004742406 |
| 1721.119966 | 129.629101 | 2.92555E-06 | 0.00503522  |
| 1721.159966 | 121.210357 | 2.73555E-06 | 0.004708317 |
| 1721.199966 | 99.117324  | 2.23694E-06 | 0.003850221 |
| 1721.239966 | 86.134379  | 1.94393E-06 | 0.003345975 |
| 1721.279966 | 86.935464  | 1.96201E-06 | 0.003377173 |
| 1721.319966 | 94.05942   | 2.12279E-06 | 0.003654001 |
| 1721.359966 | 97.032766  | 2.18989E-06 | 0.003769597 |

|             |            |             |             |
|-------------|------------|-------------|-------------|
| 1721.399966 | 106.94443  | 2.41359E-06 | 0.004154748 |
| 1721.439966 | 112.561513 | 2.54036E-06 | 0.004373071 |
| 1721.479966 | 106.26736  | 2.39831E-06 | 0.004128636 |
| 1721.519966 | 110.580022 | 2.49564E-06 | 0.004296289 |
| 1721.559966 | 116.26464  | 2.62393E-06 | 0.004517255 |
| 1721.599966 | 120.85199  | 2.72746E-06 | 0.004695597 |
| 1721.639966 | 121.654242 | 2.74557E-06 | 0.004726878 |
| 1721.679966 | 104.534904 | 2.35921E-06 | 0.0040618   |
| 1721.719966 | 93.582039  | 2.11202E-06 | 0.003636301 |
| 1721.759966 | 89.435571  | 2.01844E-06 | 0.003475263 |
| 1721.799966 | 85.52986   | 1.93029E-06 | 0.003323573 |
| 1721.839966 | 100.846412 | 2.27596E-06 | 0.003918844 |
| 1721.879966 | 121.164376 | 2.73451E-06 | 0.0047085   |
| 1721.919966 | 136.307152 | 3.07626E-06 | 0.005297078 |
| 1721.959966 | 130.95135  | 2.95539E-06 | 0.005089063 |
| 1721.999966 | 108.825597 | 2.45604E-06 | 0.004229304 |
| 1722.039966 | 99.107316  | 2.23671E-06 | 0.003851711 |
| 1722.079966 | 105.030086 | 2.37038E-06 | 0.004081989 |
| 1722.119966 | 110.103111 | 2.48487E-06 | 0.004279251 |
| 1722.159966 | 111.959502 | 2.52677E-06 | 0.004351502 |
| 1722.199966 | 122.83921  | 2.77231E-06 | 0.004774472 |
| 1722.239966 | 138.972127 | 3.13641E-06 | 0.005401646 |
| 1722.279966 | 135.784833 | 3.06447E-06 | 0.005277883 |
| 1722.319966 | 116.173747 | 2.62188E-06 | 0.004515716 |
| 1722.359966 | 105.165546 | 2.37344E-06 | 0.004087918 |
| 1722.399966 | 107.088623 | 2.41684E-06 | 0.004162767 |
| 1722.439966 | 99.320619  | 2.24153E-06 | 0.003860897 |
| 1722.479966 | 94.712833  | 2.13754E-06 | 0.003681864 |
| 1722.519966 | 104.227108 | 2.35226E-06 | 0.004051816 |
| 1722.559966 | 101.8801   | 2.29929E-06 | 0.003960668 |
| 1722.599966 | 101.870456 | 2.29907E-06 | 0.003960385 |
| 1722.639966 | 113.16154  | 2.5539E-06  | 0.004399447 |
| 1722.679966 | 114.635088 | 2.58715E-06 | 0.004456839 |
| 1722.719966 | 112.478038 | 2.53847E-06 | 0.004373078 |
| 1722.759966 | 108.990177 | 2.45976E-06 | 0.00423757  |
| 1722.799966 | 106.297967 | 2.399E-06   | 0.004132992 |
| 1722.839966 | 104.354573 | 2.35514E-06 | 0.004057525 |
| 1722.879966 | 107.675588 | 2.43009E-06 | 0.00418675  |
| 1722.919966 | 122.870379 | 2.77301E-06 | 0.00477768  |
| 1722.959966 | 123.470842 | 2.78656E-06 | 0.00480114  |
| 1722.999966 | 111.777228 | 2.52266E-06 | 0.004346537 |
| 1723.039966 | 102.594382 | 2.31541E-06 | 0.003989548 |
| 1723.079966 | 99.497157  | 2.24551E-06 | 0.003869197 |
| 1723.119966 | 95.055162  | 2.14526E-06 | 0.003696545 |
| 1723.159966 | 100.303768 | 2.26372E-06 | 0.003900745 |
| 1723.199966 | 124.366785 | 2.80679E-06 | 0.004836652 |



|             |            |             |             |
|-------------|------------|-------------|-------------|
| 1723.239966 | 131.879575 | 2.97634E-06 | 0.005128945 |
| 1723.279966 | 134.081104 | 3.02602E-06 | 0.005214686 |
| 1723.319966 | 130.513771 | 2.94551E-06 | 0.005076063 |
| 1723.359966 | 125.599146 | 2.8346E-06  | 0.004885032 |
| 1723.399966 | 137.438573 | 3.1018E-06  | 0.005345637 |
| 1723.439966 | 145.513627 | 3.28404E-06 | 0.005659846 |
| 1723.479966 | 137.565133 | 3.10465E-06 | 0.005350808 |
| 1723.519966 | 121.758655 | 2.74792E-06 | 0.004736101 |
| 1723.559966 | 107.859545 | 2.43424E-06 | 0.004195558 |
| 1723.599966 | 102.644951 | 2.31655E-06 | 0.003992812 |
| 1723.639966 | 96.087633  | 2.16856E-06 | 0.003737824 |
| 1723.679966 | 88.655273  | 2.00083E-06 | 0.003448784 |
| 1723.719966 | 96.90085   | 2.18692E-06 | 0.003769633 |
| 1723.759966 | 100.161501 | 2.26051E-06 | 0.003896569 |
| 1723.799966 | 97.931753  | 2.21018E-06 | 0.003809914 |
| 1723.839966 | 107.744963 | 2.43165E-06 | 0.004191782 |
| 1723.879966 | 121.43213  | 2.74055E-06 | 0.004724386 |
| 1723.919966 | 114.182822 | 2.57695E-06 | 0.004442451 |
| 1723.959966 | 111.75837  | 2.52223E-06 | 0.004348225 |
| 1723.999966 | 122.471458 | 2.76401E-06 | 0.004765154 |
| 1724.039966 | 121.262706 | 2.73673E-06 | 0.004718233 |
| 1724.079966 | 111.16324  | 2.5088E-06  | 0.004325371 |
| 1724.119966 | 97.367959  | 2.19746E-06 | 0.003788683 |
| 1724.159966 | 93.582908  | 2.11204E-06 | 0.003641488 |
| 1724.199966 | 97.891185  | 2.20927E-06 | 0.003809219 |
| 1724.239966 | 102.25558  | 2.30777E-06 | 0.003979142 |
| 1724.279966 | 127.496099 | 2.87741E-06 | 0.004961459 |
| 1724.319966 | 143.450791 | 3.23748E-06 | 0.005582459 |
| 1724.359966 | 132.309311 | 2.98604E-06 | 0.005149002 |
| 1724.399966 | 135.173426 | 3.05068E-06 | 0.005260585 |
| 1724.439966 | 129.442859 | 2.92135E-06 | 0.005037684 |
| 1724.479966 | 109.836836 | 2.47886E-06 | 0.004274752 |
| 1724.519966 | 101.201941 | 2.28399E-06 | 0.003938781 |
| 1724.559966 | 106.595433 | 2.40571E-06 | 0.004148792 |
| 1724.599966 | 103.852889 | 2.34382E-06 | 0.004042143 |
| 1724.639966 | 100.114015 | 2.25943E-06 | 0.00389671  |
| 1724.679966 | 102.40304  | 2.31109E-06 | 0.003985897 |
| 1724.719966 | 105.443796 | 2.37972E-06 | 0.00410435  |
| 1724.759966 | 119.16411  | 2.68937E-06 | 0.004638514 |
| 1724.799966 | 120.604401 | 2.72187E-06 | 0.004694687 |
| 1724.839966 | 111.710888 | 2.52116E-06 | 0.004348596 |
| 1724.879966 | 109.253504 | 2.4657E-06  | 0.004253036 |
| 1724.919966 | 107.544956 | 2.42714E-06 | 0.004186622 |
| 1724.959966 | 109.411067 | 2.46926E-06 | 0.004259367 |
| 1724.999966 | 125.424583 | 2.83066E-06 | 0.004882885 |
| 1725.039966 | 129.029499 | 2.91202E-06 | 0.005023344 |

|             |            |             |             |
|-------------|------------|-------------|-------------|
| 1725.079966 | 116.715289 | 2.6341E-06  | 0.004544036 |
| 1725.119966 | 121.426778 | 2.74043E-06 | 0.004727576 |
| 1725.159966 | 127.075726 | 2.86792E-06 | 0.004947624 |
| 1725.199966 | 124.998796 | 2.82105E-06 | 0.004866873 |
| 1725.239966 | 124.427749 | 2.80816E-06 | 0.004844752 |
| 1725.279966 | 142.353864 | 3.21273E-06 | 0.005542856 |
| 1725.319966 | 153.792245 | 3.47088E-06 | 0.005988373 |
| 1725.359966 | 142.927797 | 3.22568E-06 | 0.005565461 |
| 1725.399966 | 136.312052 | 3.07637E-06 | 0.005307974 |
| 1725.439966 | 119.878999 | 2.7055E-06  | 0.004668181 |
| 1725.479966 | 111.619213 | 2.51909E-06 | 0.00434664  |
| 1725.519966 | 97.169437  | 2.19298E-06 | 0.003784029 |
| 1725.559966 | 85.43367   | 1.92812E-06 | 0.003327085 |
| 1725.599966 | 83.914769  | 1.89384E-06 | 0.003268009 |
| 1725.639966 | 83.665729  | 1.88822E-06 | 0.003258386 |
| 1725.679966 | 93.125743  | 2.10172E-06 | 0.003626893 |
| 1725.719966 | 101.631126 | 2.29367E-06 | 0.003958237 |
| 1725.759966 | 99.414617  | 2.24365E-06 | 0.003872    |
| 1725.799966 | 92.855235  | 2.09561E-06 | 0.003616609 |
| 1725.839966 | 94.458908  | 2.13181E-06 | 0.003679156 |
| 1725.879966 | 99.878196  | 2.25411E-06 | 0.003890326 |
| 1725.919966 | 104.485461 | 2.35809E-06 | 0.004069877 |
| 1725.959966 | 107.395153 | 2.42376E-06 | 0.004183311 |
| 1725.999966 | 103.301443 | 2.33137E-06 | 0.004023944 |
| 1726.039966 | 102.692498 | 2.31763E-06 | 0.004000316 |
| 1726.079966 | 103.431575 | 2.33431E-06 | 0.0040292   |
| 1726.119966 | 102.292451 | 2.3086E-06  | 0.003984917 |
| 1726.159966 | 112.905344 | 2.54812E-06 | 0.004398456 |
| 1726.199966 | 112.600154 | 2.54123E-06 | 0.004386669 |
| 1726.239966 | 114.18514  | 2.577E-06   | 0.00444852  |
| 1726.279966 | 128.874249 | 2.90851E-06 | 0.005020907 |
| 1726.319966 | 138.096598 | 3.11665E-06 | 0.005380331 |
| 1726.359966 | 129.626002 | 2.92548E-06 | 0.005050429 |
| 1726.399966 | 115.789324 | 2.6132E-06  | 0.004511435 |
| 1726.439966 | 110.430962 | 2.49227E-06 | 0.00430276  |
| 1726.479966 | 108.887068 | 2.45743E-06 | 0.004242703 |
| 1726.519966 | 104.769667 | 2.36451E-06 | 0.004082366 |
| 1726.559966 | 106.955492 | 2.41384E-06 | 0.004167633 |
| 1726.599966 | 109.551387 | 2.47242E-06 | 0.004268884 |
| 1726.639966 | 108.319491 | 2.44462E-06 | 0.004220979 |
| 1726.679966 | 101.326458 | 2.2868E-06  | 0.003948567 |
| 1726.719966 | 112.775217 | 2.54518E-06 | 0.004394812 |
| 1726.759966 | 115.289934 | 2.60193E-06 | 0.004492914 |
| 1726.799966 | 99.319904  | 2.24151E-06 | 0.003870643 |
| 1726.839966 | 88.817085  | 2.00448E-06 | 0.003461413 |
| 1726.879966 | 101.91227  | 2.30002E-06 | 0.003971855 |

|             |            |             |             |
|-------------|------------|-------------|-------------|
| 1726.919966 | 102.777897 | 2.31955E-06 | 0.004005684 |
| 1726.959966 | 99.035838  | 2.2351E-06  | 0.00385993  |
| 1726.999966 | 99.456382  | 2.24459E-06 | 0.00387641  |
| 1727.039966 | 109.894883 | 2.48017E-06 | 0.00428336  |
| 1727.079966 | 129.197748 | 2.91581E-06 | 0.005035843 |
| 1727.119966 | 122.920785 | 2.77415E-06 | 0.004791291 |
| 1727.159966 | 111.536321 | 2.51722E-06 | 0.004347641 |
| 1727.199966 | 113.721948 | 2.56655E-06 | 0.004432938 |
| 1727.239966 | 108.563409 | 2.45012E-06 | 0.004231954 |
| 1727.279966 | 98.511403  | 2.22327E-06 | 0.003840201 |
| 1727.319966 | 98.660974  | 2.22664E-06 | 0.003846121 |
| 1727.359966 | 115.906363 | 2.61585E-06 | 0.004518506 |
| 1727.399966 | 129.553019 | 2.92383E-06 | 0.005050626 |
| 1727.439966 | 127.847033 | 2.88533E-06 | 0.004984233 |
| 1727.479966 | 117.283691 | 2.64693E-06 | 0.004572518 |
| 1727.519966 | 103.434665 | 2.33438E-06 | 0.004032682 |
| 1727.559966 | 101.602092 | 2.29302E-06 | 0.003961326 |
| 1727.599966 | 105.323184 | 2.377E-06   | 0.004106501 |
| 1727.639966 | 109.762756 | 2.47719E-06 | 0.004279697 |
| 1727.679966 | 94.141803  | 2.12465E-06 | 0.003670714 |
| 1727.719966 | 90.451754  | 2.04137E-06 | 0.003526916 |
| 1727.759966 | 112.875117 | 2.54743E-06 | 0.004401355 |
| 1727.799966 | 110.140626 | 2.48572E-06 | 0.004294828 |
| 1727.839966 | 97.28871   | 2.19567E-06 | 0.003793768 |
| 1727.879966 | 103.86035  | 2.34398E-06 | 0.004050122 |
| 1727.919966 | 108.530722 | 2.44939E-06 | 0.004232345 |
| 1727.959966 | 106.914536 | 2.41291E-06 | 0.004169416 |
| 1727.999966 | 108.797704 | 2.45541E-06 | 0.004242953 |
| 1728.039966 | 103.136462 | 2.32765E-06 | 0.004022266 |
| 1728.079966 | 106.563407 | 2.40499E-06 | 0.004156011 |
| 1728.119966 | 110.800933 | 2.50062E-06 | 0.004321376 |
| 1728.159966 | 110.599615 | 2.49608E-06 | 0.004313624 |
| 1728.199966 | 112.180301 | 2.53175E-06 | 0.004375376 |
| 1728.239966 | 113.874037 | 2.56998E-06 | 0.004441539 |
| 1728.279966 | 111.789895 | 2.52294E-06 | 0.00436035  |
| 1728.319966 | 117.161939 | 2.64418E-06 | 0.004569992 |
| 1728.359966 | 129.121318 | 2.91409E-06 | 0.005036594 |
| 1728.399966 | 133.844496 | 3.02068E-06 | 0.00522095  |
| 1728.439966 | 125.782209 | 2.83873E-06 | 0.004906573 |
| 1728.479966 | 115.356961 | 2.60345E-06 | 0.004500004 |
| 1728.519966 | 104.69315  | 2.36278E-06 | 0.00408411  |
| 1728.559966 | 97.329597  | 2.19659E-06 | 0.003796943 |
| 1728.599966 | 96.986837  | 2.18886E-06 | 0.00378366  |
| 1728.639966 | 83.550477  | 1.88562E-06 | 0.003259554 |
| 1728.679966 | 82.626467  | 1.86476E-06 | 0.003223581 |
| 1728.719966 | 95.730176  | 2.1605E-06  | 0.003734894 |

|             |            |             |             |
|-------------|------------|-------------|-------------|
| 1728.759966 | 107.512921 | 2.42642E-06 | 0.004194692 |
| 1728.799966 | 119.522296 | 2.69745E-06 | 0.004663354 |
| 1728.839966 | 137.42682  | 3.10153E-06 | 0.005362052 |
| 1728.879966 | 148.950268 | 3.3616E-06  | 0.005811803 |
| 1728.919966 | 119.471254 | 2.6963E-06  | 0.004661687 |
| 1728.959966 | 89.933295  | 2.02967E-06 | 0.003509217 |
| 1728.999966 | 95.078352  | 2.14579E-06 | 0.003710064 |
| 1729.039966 | 121.408026 | 2.74001E-06 | 0.004737587 |
| 1729.079966 | 135.932133 | 3.0678E-06  | 0.00530447  |
| 1729.119966 | 146.224716 | 3.30009E-06 | 0.005706248 |
| 1729.159966 | 152.279688 | 3.43674E-06 | 0.005942674 |
| 1729.199966 | 129.12305  | 2.91413E-06 | 0.005039109 |
| 1729.239966 | 116.014384 | 2.61828E-06 | 0.00452764  |
| 1729.279966 | 115.14636  | 2.59869E-06 | 0.004493868 |
| 1729.319966 | 124.694183 | 2.81417E-06 | 0.004866607 |
| 1729.359966 | 132.762814 | 2.99627E-06 | 0.005181632 |
| 1729.399966 | 127.679021 | 2.88154E-06 | 0.004983331 |
| 1729.439966 | 121.899551 | 2.7511E-06  | 0.004757868 |
| 1729.479966 | 114.864719 | 2.59234E-06 | 0.004483394 |
| 1729.519966 | 105.045239 | 2.37072E-06 | 0.004100216 |
| 1729.559966 | 105.461116 | 2.38011E-06 | 0.004116544 |
| 1729.599966 | 97.787961  | 2.20694E-06 | 0.00381712  |
| 1729.639966 | 87.948579  | 1.98488E-06 | 0.003433122 |
| 1729.679966 | 85.31751   | 1.9255E-06  | 0.003330494 |
| 1729.719966 | 89.994678  | 2.03105E-06 | 0.003513156 |
| 1729.759966 | 82.374104  | 1.85907E-06 | 0.003215743 |
| 1729.799966 | 71.12485   | 1.60519E-06 | 0.002776656 |
| 1729.839966 | 73.669729  | 1.66262E-06 | 0.002876072 |
| 1729.879966 | 77.882624  | 1.7577E-06  | 0.003040614 |
| 1729.919966 | 97.524467  | 2.20099E-06 | 0.003807539 |
| 1729.959966 | 116.614808 | 2.63183E-06 | 0.004552967 |
| 1729.999966 | 133.718691 | 3.01784E-06 | 0.005220871 |
| 1730.039966 | 124.705785 | 2.81444E-06 | 0.004869087 |
| 1730.079966 | 110.496149 | 2.49374E-06 | 0.004314377 |
| 1730.119966 | 93.467746  | 2.10944E-06 | 0.003649579 |
| 1730.159966 | 87.009503  | 1.96368E-06 | 0.003397486 |
| 1730.199966 | 111.553889 | 2.51762E-06 | 0.004355979 |
| 1730.239966 | 126.190707 | 2.84795E-06 | 0.004927634 |
| 1730.279966 | 121.18343  | 2.73494E-06 | 0.004732214 |
| 1730.319966 | 113.718933 | 2.56648E-06 | 0.004440828 |
| 1730.359966 | 100.612273 | 2.27068E-06 | 0.003929092 |
| 1730.399966 | 94.482282  | 2.13233E-06 | 0.00368979  |
| 1730.439966 | 98.818058  | 2.23019E-06 | 0.003859203 |
| 1730.479966 | 104.457794 | 2.35747E-06 | 0.004079549 |
| 1730.519966 | 106.121107 | 2.39501E-06 | 0.004144605 |
| 1730.559966 | 96.569893  | 2.17945E-06 | 0.003771665 |

|             |            |             |             |
|-------------|------------|-------------|-------------|
| 1730.599966 | 98.107449  | 2.21415E-06 | 0.003831805 |
| 1730.639966 | 90.118965  | 2.03386E-06 | 0.003519879 |
| 1730.679966 | 94.732935  | 2.13799E-06 | 0.003700177 |
| 1730.719966 | 115.489966 | 2.60645E-06 | 0.004511031 |
| 1730.759966 | 128.71644  | 2.90495E-06 | 0.005027772 |
| 1730.799966 | 126.667509 | 2.85871E-06 | 0.004947854 |
| 1730.839966 | 112.667967 | 2.54276E-06 | 0.004401109 |
| 1730.879966 | 105.621574 | 2.38373E-06 | 0.004125954 |
| 1730.919966 | 107.493009 | 2.42597E-06 | 0.004199156 |
| 1730.959966 | 104.086753 | 2.34909E-06 | 0.004066186 |
| 1730.999966 | 95.295768  | 2.15069E-06 | 0.003722849 |
| 1731.039966 | 95.206735  | 2.14868E-06 | 0.003719457 |
| 1731.079966 | 98.284293  | 2.21814E-06 | 0.003839777 |
| 1731.119966 | 112.416961 | 2.53709E-06 | 0.004392014 |
| 1731.159966 | 117.922507 | 2.66135E-06 | 0.004607217 |
| 1731.199966 | 93.034263  | 2.09965E-06 | 0.00363492  |
| 1731.239966 | 81.128514  | 1.83096E-06 | 0.003169827 |
| 1731.279966 | 83.573247  | 1.88613E-06 | 0.003265422 |
| 1731.319966 | 93.602833  | 2.11249E-06 | 0.003657388 |
| 1731.359966 | 111.671574 | 2.52027E-06 | 0.004363498 |
| 1731.399966 | 125.02939  | 2.82174E-06 | 0.004885559 |
| 1731.439966 | 117.026073 | 2.64112E-06 | 0.004572933 |
| 1731.479966 | 99.770274  | 2.25168E-06 | 0.003898732 |
| 1731.519966 | 96.964336  | 2.18835E-06 | 0.003789172 |
| 1731.559966 | 106.548551 | 2.40465E-06 | 0.0041638   |
| 1731.599966 | 119.314343 | 2.69276E-06 | 0.004662781 |
| 1731.639966 | 123.896289 | 2.79617E-06 | 0.004841954 |
| 1731.679966 | 102.821606 | 2.32054E-06 | 0.004018433 |
| 1731.719966 | 78.321727  | 1.76761E-06 | 0.003061009 |
| 1731.759966 | 72.181877  | 1.62904E-06 | 0.002821114 |
| 1731.799966 | 92.609016  | 2.09006E-06 | 0.00361956  |
| 1731.839966 | 123.171191 | 2.7798E-06  | 0.004814173 |
| 1731.879966 | 124.041685 | 2.79945E-06 | 0.004848308 |
| 1731.919966 | 116.851672 | 2.63718E-06 | 0.004567384 |
| 1731.959966 | 112.332244 | 2.53518E-06 | 0.004390834 |
| 1731.999966 | 106.673224 | 2.40747E-06 | 0.004169731 |
| 1732.039966 | 118.072746 | 2.66474E-06 | 0.004615432 |
| 1732.079966 | 116.385353 | 2.62666E-06 | 0.004549577 |
| 1732.119966 | 108.190399 | 2.44171E-06 | 0.004229329 |
| 1732.159966 | 129.541629 | 2.92357E-06 | 0.005064098 |
| 1732.199966 | 132.483245 | 2.98996E-06 | 0.005179213 |
| 1732.239966 | 113.993483 | 2.57267E-06 | 0.004456489 |
| 1732.279966 | 114.373057 | 2.58124E-06 | 0.004471431 |
| 1732.319966 | 122.853653 | 2.77264E-06 | 0.004803092 |
| 1732.359966 | 116.894753 | 2.63815E-06 | 0.004570228 |
| 1732.399966 | 107.660756 | 2.42975E-06 | 0.004209305 |

|             |            |             |             |
|-------------|------------|-------------|-------------|
| 1732.439966 | 128.628547 | 2.90297E-06 | 0.005029216 |
| 1732.479966 | 134.965583 | 3.04599E-06 | 0.005277108 |
| 1732.519966 | 126.151991 | 2.84707E-06 | 0.004932614 |
| 1732.559966 | 123.043622 | 2.77692E-06 | 0.004811186 |
| 1732.599966 | 121.240835 | 2.73624E-06 | 0.004740804 |
| 1732.639966 | 111.91016  | 2.52566E-06 | 0.004376053 |
| 1732.679966 | 97.296806  | 2.19585E-06 | 0.003804711 |
| 1732.719966 | 90.658378  | 2.04603E-06 | 0.003545203 |
| 1732.759966 | 101.896484 | 2.29966E-06 | 0.003984762 |
| 1732.799966 | 122.330284 | 2.76082E-06 | 0.004783956 |
| 1732.839966 | 129.047851 | 2.91243E-06 | 0.005046776 |
| 1732.879966 | 122.966018 | 2.77517E-06 | 0.00480904  |
| 1732.919966 | 122.682913 | 2.76878E-06 | 0.004798078 |
| 1732.959966 | 132.28259  | 2.98543E-06 | 0.005173637 |
| 1732.999966 | 126.687823 | 2.85917E-06 | 0.004954938 |
| 1733.039966 | 111.733471 | 2.52167E-06 | 0.004370153 |
| 1733.079966 | 96.307287  | 2.17352E-06 | 0.003766886 |
| 1733.119966 | 98.429453  | 2.22142E-06 | 0.00384998  |
| 1733.159966 | 100.88526  | 2.27684E-06 | 0.003946128 |
| 1733.199966 | 102.109966 | 2.30448E-06 | 0.003994124 |
| 1733.239966 | 101.293488 | 2.28605E-06 | 0.003962278 |
| 1733.279966 | 112.132886 | 2.53068E-06 | 0.004386382 |
| 1733.319966 | 121.030075 | 2.73148E-06 | 0.004734529 |
| 1733.359966 | 122.825274 | 2.772E-06   | 0.004804866 |
| 1733.399966 | 128.385658 | 2.89749E-06 | 0.005022501 |
| 1733.439966 | 113.612518 | 2.56408E-06 | 0.004444672 |
| 1733.479966 | 102.237232 | 2.30735E-06 | 0.003999748 |
| 1733.519966 | 97.107351  | 2.19158E-06 | 0.003799144 |
| 1733.559966 | 90.919224  | 2.05192E-06 | 0.003557127 |
| 1733.599966 | 99.646836  | 2.24889E-06 | 0.003898676 |
| 1733.639966 | 107.470689 | 2.42546E-06 | 0.004204881 |
| 1733.679966 | 102.888886 | 2.32206E-06 | 0.004025707 |
| 1733.719966 | 103.366545 | 2.33284E-06 | 0.004044489 |
| 1733.759966 | 122.851928 | 2.7726E-06  | 0.004807018 |
| 1733.799966 | 142.726674 | 3.22114E-06 | 0.005584816 |
| 1733.839966 | 147.888914 | 3.33765E-06 | 0.005786945 |
| 1733.879966 | 136.498216 | 3.08057E-06 | 0.005341347 |
| 1733.919966 | 116.024655 | 2.61851E-06 | 0.004540295 |
| 1733.959966 | 118.047736 | 2.66417E-06 | 0.004619569 |
| 1733.999966 | 120.814241 | 2.72661E-06 | 0.00472794  |
| 1734.039966 | 109.045109 | 2.461E-06   | 0.004267466 |
| 1734.079966 | 92.301479  | 2.08312E-06 | 0.003612289 |
| 1734.119966 | 84.458363  | 1.90611E-06 | 0.003305419 |
| 1734.159966 | 84.591368  | 1.90911E-06 | 0.003310701 |
| 1734.199966 | 89.042623  | 2.00957E-06 | 0.003484993 |
| 1734.239966 | 103.384525 | 2.33324E-06 | 0.004046406 |

|             |            |             |             |
|-------------|------------|-------------|-------------|
| 1734.279966 | 109.01933  | 2.46041E-06 | 0.004267047 |
| 1734.319966 | 114.005133 | 2.57294E-06 | 0.004462296 |
| 1734.359966 | 113.935607 | 2.57137E-06 | 0.004459678 |
| 1734.399966 | 110.039169 | 2.48343E-06 | 0.004307262 |
| 1734.439966 | 104.329586 | 2.35457E-06 | 0.004083866 |
| 1734.479966 | 100.005934 | 2.25699E-06 | 0.003914712 |
| 1734.519966 | 95.952062  | 2.1655E-06  | 0.003756111 |
| 1734.559966 | 89.393045  | 2.01748E-06 | 0.003499434 |
| 1734.599966 | 100.591787 | 2.27022E-06 | 0.003937917 |
| 1734.639966 | 117.032125 | 2.64125E-06 | 0.004581621 |
| 1734.679966 | 109.217612 | 2.46489E-06 | 0.004275794 |
| 1734.719966 | 96.649388  | 2.18124E-06 | 0.003783844 |
| 1734.759966 | 104.676568 | 2.3624E-06  | 0.004098204 |
| 1734.799966 | 112.56718  | 2.54048E-06 | 0.004407232 |
| 1734.839966 | 114.07909  | 2.57461E-06 | 0.00446653  |
| 1734.879966 | 106.612496 | 2.4061E-06  | 0.004174287 |
| 1734.919966 | 94.784588  | 2.13916E-06 | 0.003711265 |
| 1734.959966 | 102.454995 | 2.31227E-06 | 0.00401169  |
| 1734.999966 | 119.495844 | 2.69685E-06 | 0.004679043 |
| 1735.039966 | 119.685816 | 2.70114E-06 | 0.00468659  |
| 1735.079966 | 103.174294 | 2.3285E-06  | 0.004040134 |
| 1735.119966 | 105.346551 | 2.37752E-06 | 0.004125291 |
| 1735.159966 | 111.044642 | 2.50612E-06 | 0.004348524 |
| 1735.199966 | 126.769634 | 2.86101E-06 | 0.004964432 |
| 1735.239966 | 138.297612 | 3.12118E-06 | 0.005416004 |
| 1735.279966 | 131.08848  | 2.95848E-06 | 0.005133799 |
| 1735.319966 | 119.954794 | 2.70721E-06 | 0.00469788  |
| 1735.359966 | 108.342485 | 2.44514E-06 | 0.004243196 |
| 1735.399966 | 101.665532 | 2.29445E-06 | 0.003981787 |
| 1735.439966 | 111.482077 | 2.516E-06   | 0.004366359 |
| 1735.479966 | 118.439689 | 2.67302E-06 | 0.004638971 |
| 1735.519966 | 107.051001 | 2.41599E-06 | 0.004193002 |
| 1735.559966 | 103.14881  | 2.32792E-06 | 0.004040253 |
| 1735.599966 | 96.465213  | 2.17709E-06 | 0.00377855  |
| 1735.639966 | 85.002209  | 1.91838E-06 | 0.00332962  |
| 1735.679966 | 88.708525  | 2.00203E-06 | 0.00347488  |
| 1735.719966 | 98.440387  | 2.22166E-06 | 0.003856184 |
| 1735.759966 | 98.457004  | 2.22204E-06 | 0.003856924 |
| 1735.799966 | 102.332244 | 2.3095E-06  | 0.004008823 |
| 1735.839966 | 90.112991  | 2.03372E-06 | 0.003530221 |
| 1735.879966 | 85.215598  | 1.9232E-06  | 0.00333844  |
| 1735.919966 | 94.863947  | 2.14095E-06 | 0.003716513 |
| 1735.959966 | 108.171231 | 2.44127E-06 | 0.004237954 |
| 1735.999966 | 103.806713 | 2.34277E-06 | 0.004067054 |
| 1736.039966 | 96.253181  | 2.1723E-06  | 0.0037712   |
| 1736.079966 | 103.077208 | 2.32631E-06 | 0.004038658 |

|             |            |             |             |
|-------------|------------|-------------|-------------|
| 1736.119966 | 100.150086 | 2.26025E-06 | 0.003924062 |
| 1736.159966 | 86.848851  | 1.96006E-06 | 0.003402974 |
| 1736.199966 | 74.825619  | 1.68871E-06 | 0.002931938 |
| 1736.239966 | 88.374935  | 1.9945E-06  | 0.003462929 |
| 1736.279966 | 106.74755  | 2.40914E-06 | 0.004182948 |
| 1736.319966 | 125.764004 | 2.83832E-06 | 0.004928229 |
| 1736.359966 | 131.217974 | 2.96141E-06 | 0.005142068 |
| 1736.399966 | 136.813339 | 3.08769E-06 | 0.005361459 |
| 1736.439966 | 150.019633 | 3.38573E-06 | 0.005879124 |
| 1736.479966 | 143.916876 | 3.248E-06   | 0.005640093 |
| 1736.519966 | 125.692135 | 2.8367E-06  | 0.00492598  |
| 1736.559966 | 118.477199 | 2.67387E-06 | 0.004643328 |
| 1736.599966 | 117.512955 | 2.6521E-06  | 0.004605643 |
| 1736.639966 | 125.692004 | 2.83669E-06 | 0.004926315 |
| 1736.679966 | 130.042808 | 2.93489E-06 | 0.005096956 |
| 1736.719966 | 112.294173 | 2.53432E-06 | 0.004401409 |
| 1736.759966 | 106.088922 | 2.39428E-06 | 0.004158288 |
| 1736.799966 | 120.188877 | 2.7125E-06  | 0.004711062 |
| 1736.839966 | 126.71471  | 2.85977E-06 | 0.004966971 |
| 1736.879966 | 109.345411 | 2.46777E-06 | 0.004286227 |
| 1736.919966 | 108.946243 | 2.45876E-06 | 0.004270678 |
| 1736.959966 | 107.019728 | 2.41529E-06 | 0.004195255 |
| 1736.999966 | 105.349414 | 2.37759E-06 | 0.004129873 |
| 1737.039966 | 116.934428 | 2.63905E-06 | 0.00458413  |
| 1737.079966 | 137.544394 | 3.10419E-06 | 0.005392218 |
| 1737.119966 | 138.065464 | 3.11595E-06 | 0.005412771 |
| 1737.159966 | 120.239658 | 2.71364E-06 | 0.00471403  |
| 1737.199966 | 107.326432 | 2.42221E-06 | 0.00420786  |
| 1737.239966 | 97.358383  | 2.19724E-06 | 0.003817139 |
| 1737.279966 | 93.884345  | 2.11884E-06 | 0.003681016 |
| 1737.319966 | 97.529537  | 2.20111E-06 | 0.003824025 |
| 1737.359966 | 98.902866  | 2.2321E-06  | 0.003877961 |
| 1737.399966 | 100.92499  | 2.27774E-06 | 0.003957339 |
| 1737.439966 | 99.795764  | 2.25225E-06 | 0.003913152 |
| 1737.479966 | 101.263713 | 2.28538E-06 | 0.003970804 |
| 1737.519966 | 107.975249 | 2.43685E-06 | 0.004234077 |
| 1737.559966 | 94.961851  | 2.14316E-06 | 0.003723863 |
| 1737.599966 | 84.857777  | 1.91512E-06 | 0.003327716 |
| 1737.639966 | 85.474356  | 1.92904E-06 | 0.003351972 |
| 1737.679966 | 96.060036  | 2.16794E-06 | 0.003767188 |
| 1737.719966 | 94.852861  | 2.1407E-06  | 0.003719932 |
| 1737.759966 | 89.266238  | 2.01461E-06 | 0.003500917 |
| 1737.799966 | 90.237986  | 2.03655E-06 | 0.003539109 |
| 1737.839966 | 92.34121   | 2.08401E-06 | 0.00362168  |
| 1737.879966 | 97.010569  | 2.18939E-06 | 0.003804903 |
| 1737.919966 | 91.024126  | 2.05429E-06 | 0.003570188 |



|             |            |             |             |
|-------------|------------|-------------|-------------|
| 1737.959966 | 85.358736  | 1.92643E-06 | 0.003348054 |
| 1737.999966 | 91.438158  | 2.06363E-06 | 0.003586592 |
| 1738.039966 | 87.714367  | 1.97959E-06 | 0.003440608 |
| 1738.079966 | 73.757575  | 1.66461E-06 | 0.002893218 |
| 1738.119966 | 69.734835  | 1.57382E-06 | 0.002735485 |
| 1738.159966 | 85.198662  | 1.92282E-06 | 0.00334216  |
| 1738.199966 | 109.626561 | 2.47412E-06 | 0.004300513 |
| 1738.239966 | 126.505245 | 2.85505E-06 | 0.004962757 |
| 1738.279966 | 131.834829 | 2.97533E-06 | 0.005171954 |
| 1738.319966 | 129.359289 | 2.91946E-06 | 0.005074954 |
| 1738.359966 | 126.950025 | 2.86509E-06 | 0.004980549 |
| 1738.399966 | 115.559351 | 2.60801E-06 | 0.004533771 |
| 1738.439966 | 108.025765 | 2.43799E-06 | 0.004238301 |
| 1738.479966 | 106.649947 | 2.40694E-06 | 0.004184418 |
| 1738.519966 | 98.073002  | 2.21337E-06 | 0.00384799  |
| 1738.559966 | 96.116246  | 2.16921E-06 | 0.003771301 |
| 1738.599966 | 96.615707  | 2.18048E-06 | 0.003790986 |
| 1738.639966 | 84.344117  | 1.90353E-06 | 0.003309552 |
| 1738.679966 | 104.421238 | 2.35664E-06 | 0.004097446 |
| 1738.719966 | 134.552281 | 3.03666E-06 | 0.005279897 |
| 1738.759966 | 115.711903 | 2.61146E-06 | 0.004540696 |
| 1738.799966 | 94.23397   | 2.12673E-06 | 0.003697957 |
| 1738.839966 | 107.332785 | 2.42235E-06 | 0.004212082 |
| 1738.879966 | 124.644347 | 2.81305E-06 | 0.004891555 |
| 1738.919966 | 130.965299 | 2.9557E-06  | 0.005139733 |
| 1738.959966 | 129.938743 | 2.93254E-06 | 0.005099563 |
| 1738.999966 | 125.456492 | 2.83138E-06 | 0.004923767 |
| 1739.039966 | 105.729797 | 2.38617E-06 | 0.004149652 |
| 1739.079966 | 98.962341  | 2.23344E-06 | 0.003884135 |
| 1739.119966 | 117.018408 | 2.64094E-06 | 0.004592916 |
| 1739.159966 | 130.891277 | 2.95403E-06 | 0.005137537 |
| 1739.199966 | 131.614688 | 2.97036E-06 | 0.00516605  |
| 1739.239966 | 122.869148 | 2.77299E-06 | 0.004822887 |
| 1739.279966 | 114.434065 | 2.58262E-06 | 0.004491895 |
| 1739.319966 | 112.018531 | 2.5281E-06  | 0.004397179 |
| 1739.359966 | 116.178396 | 2.62198E-06 | 0.004560575 |
| 1739.399966 | 115.523522 | 2.6072E-06  | 0.004534972 |
| 1739.439966 | 109.20675  | 2.46464E-06 | 0.004287101 |
| 1739.479966 | 132.428376 | 2.98872E-06 | 0.005198826 |
| 1739.519966 | 140.089669 | 3.16163E-06 | 0.005499716 |
| 1739.559966 | 115.90419  | 2.6158E-06  | 0.004550334 |
| 1739.599966 | 101.226366 | 2.28454E-06 | 0.003974182 |
| 1739.639966 | 102.150421 | 2.30539E-06 | 0.004010553 |
| 1739.679966 | 90.728619  | 2.04762E-06 | 0.003562201 |
| 1739.719966 | 85.845194  | 1.93741E-06 | 0.003370545 |
| 1739.759966 | 89.887602  | 2.02864E-06 | 0.003529343 |

|             |            |             |             |
|-------------|------------|-------------|-------------|
| 1739.799966 | 88.892919  | 2.00619E-06 | 0.003490368 |
| 1739.839966 | 88.181332  | 1.99013E-06 | 0.003462507 |
| 1739.879966 | 88.094769  | 1.98818E-06 | 0.003459188 |
| 1739.919966 | 88.599703  | 1.99957E-06 | 0.003479095 |
| 1739.959966 | 98.084974  | 2.21364E-06 | 0.003851647 |
| 1739.999966 | 96.268696  | 2.17265E-06 | 0.003780412 |
| 1740.039966 | 108.722347 | 2.45371E-06 | 0.004269557 |
| 1740.079966 | 113.839112 | 2.56919E-06 | 0.004470596 |
| 1740.119966 | 126.297261 | 2.85035E-06 | 0.004959957 |
| 1740.159966 | 131.362156 | 2.96466E-06 | 0.005158984 |
| 1740.199966 | 128.735764 | 2.90539E-06 | 0.005055954 |
| 1740.239966 | 137.862342 | 3.11136E-06 | 0.005414515 |
| 1740.279966 | 133.737375 | 3.01827E-06 | 0.005252628 |
| 1740.319966 | 118.892028 | 2.68323E-06 | 0.004669674 |
| 1740.359966 | 117.556325 | 2.65308E-06 | 0.004617319 |
| 1740.399966 | 137.979117 | 3.114E-06   | 0.005419599 |
| 1740.439966 | 142.322955 | 3.21203E-06 | 0.005590347 |
| 1740.479966 | 119.752045 | 2.70264E-06 | 0.004703885 |
| 1740.519966 | 104.844376 | 2.36619E-06 | 0.004118404 |
| 1740.559966 | 101.026773 | 2.28003E-06 | 0.003968535 |
| 1740.599966 | 113.607441 | 2.56396E-06 | 0.004462832 |
| 1740.639966 | 115.951713 | 2.61687E-06 | 0.004555026 |
| 1740.679966 | 91.890784  | 2.07385E-06 | 0.003609904 |
| 1740.719966 | 77.705448  | 1.7537E-06  | 0.003052707 |
| 1740.759966 | 83.06194   | 1.87459E-06 | 0.003263215 |
| 1740.799966 | 107.535951 | 2.42694E-06 | 0.004224811 |
| 1740.839966 | 127.490256 | 2.87728E-06 | 0.00500888  |
| 1740.879966 | 116.579574 | 2.63104E-06 | 0.004580322 |
| 1740.919966 | 118.193016 | 2.66745E-06 | 0.00464382  |
| 1740.959966 | 109.442066 | 2.46995E-06 | 0.004300093 |
| 1740.999966 | 116.246681 | 2.62353E-06 | 0.004567558 |
| 1741.039966 | 112.840388 | 2.54665E-06 | 0.00443382  |
| 1741.079966 | 96.12059   | 2.16931E-06 | 0.003776938 |
| 1741.119966 | 86.639515  | 1.95533E-06 | 0.00340447  |
| 1741.159966 | 84.2054    | 1.9004E-06  | 0.003308898 |
| 1741.199966 | 94.316391  | 2.12859E-06 | 0.0037063   |
| 1741.239966 | 120.198465 | 2.71271E-06 | 0.004723482 |
| 1741.279966 | 148.138658 | 3.34328E-06 | 0.005821592 |
| 1741.319966 | 148.968002 | 3.362E-06   | 0.005854318 |
| 1741.359966 | 132.816712 | 2.99749E-06 | 0.005219706 |
| 1741.399966 | 124.626451 | 2.81265E-06 | 0.004897941 |
| 1741.439966 | 108.537077 | 2.44953E-06 | 0.004265711 |
| 1741.479966 | 88.252313  | 1.99173E-06 | 0.003468561 |
| 1741.519966 | 70.63179   | 1.59406E-06 | 0.002776089 |
| 1741.559966 | 72.939397  | 1.64614E-06 | 0.002866853 |
| 1741.599966 | 87.112915  | 1.96602E-06 | 0.003424015 |

|             |            |             |             |
|-------------|------------|-------------|-------------|
| 1741.639966 | 102.861315 | 2.32144E-06 | 0.004043107 |
| 1741.679966 | 103.276096 | 2.3308E-06  | 0.004059504 |
| 1741.719966 | 102.025694 | 2.30258E-06 | 0.004010446 |
| 1741.759966 | 112.049472 | 2.5288E-06  | 0.004404563 |
| 1741.799966 | 123.168499 | 2.77974E-06 | 0.004841754 |
| 1741.839966 | 117.681842 | 2.65592E-06 | 0.004626179 |
| 1741.879966 | 107.852114 | 2.43407E-06 | 0.004239861 |
| 1741.919966 | 105.445276 | 2.37975E-06 | 0.004145339 |
| 1741.959966 | 112.968335 | 2.54954E-06 | 0.004441193 |
| 1741.999966 | 108.404973 | 2.44655E-06 | 0.004261889 |
| 1742.039966 | 106.521109 | 2.40403E-06 | 0.004187922 |
| 1742.079966 | 112.577117 | 2.54071E-06 | 0.004426118 |
| 1742.119966 | 110.07708  | 2.48429E-06 | 0.004327925 |
| 1742.159966 | 117.915642 | 2.66119E-06 | 0.004636222 |
| 1742.199966 | 109.817599 | 2.47843E-06 | 0.004317921 |
| 1742.239966 | 104.463257 | 2.35759E-06 | 0.004107488 |
| 1742.279966 | 127.14153  | 2.86941E-06 | 0.004999311 |
| 1742.319966 | 126.288016 | 2.85014E-06 | 0.004965864 |
| 1742.359966 | 112.28834  | 2.53419E-06 | 0.004415474 |
| 1742.399966 | 104.33679  | 2.35474E-06 | 0.004102892 |
| 1742.439966 | 97.585259  | 2.20236E-06 | 0.003837486 |
| 1742.479966 | 98.696403  | 2.22744E-06 | 0.00388127  |
| 1742.519966 | 101.476316 | 2.29018E-06 | 0.003990683 |
| 1742.559966 | 95.095374  | 2.14617E-06 | 0.00373983  |
| 1742.599966 | 93.414781  | 2.10824E-06 | 0.003673822 |
| 1742.639966 | 109.95416  | 2.48151E-06 | 0.004324382 |
| 1742.679966 | 119.448229 | 2.69578E-06 | 0.004697882 |
| 1742.719966 | 112.145914 | 2.53098E-06 | 0.004410784 |
| 1742.759966 | 98.761985  | 2.22892E-06 | 0.003884473 |
| 1742.799966 | 108.48682  | 2.4484E-06  | 0.004267065 |
| 1742.839966 | 104.984799 | 2.36936E-06 | 0.004129416 |
| 1742.879966 | 88.02976   | 1.98671E-06 | 0.003462595 |
| 1742.919966 | 78.173933  | 1.76428E-06 | 0.003074993 |
| 1742.959966 | 70.459264  | 1.59017E-06 | 0.002771598 |
| 1742.999966 | 78.55747   | 1.77293E-06 | 0.003090222 |
| 1743.039966 | 89.585088  | 2.02181E-06 | 0.003524097 |
| 1743.079966 | 99.672827  | 2.24948E-06 | 0.003921018 |
| 1743.119966 | 116.654813 | 2.63274E-06 | 0.004589176 |
| 1743.159966 | 120.07445  | 2.70991E-06 | 0.004723812 |
| 1743.199966 | 104.061326 | 2.34852E-06 | 0.004093939 |
| 1743.239966 | 86.625115  | 1.95501E-06 | 0.003408048 |
| 1743.279966 | 96.330744  | 2.17405E-06 | 0.003789979 |
| 1743.319966 | 96.988357  | 2.18889E-06 | 0.003815939 |
| 1743.359966 | 89.284373  | 2.01502E-06 | 0.003512912 |
| 1743.399966 | 85.437264  | 1.9282E-06  | 0.003361624 |
| 1743.439966 | 101.278181 | 2.28571E-06 | 0.003984994 |

|             |            |             |             |
|-------------|------------|-------------|-------------|
| 1743.479965 | 112.655782 | 2.54248E-06 | 0.00443277  |
| 1743.519965 | 105.696364 | 2.38542E-06 | 0.004159027 |
| 1743.559965 | 94.231231  | 2.12667E-06 | 0.003707973 |
| 1743.599965 | 79.285229  | 1.78936E-06 | 0.003119923 |
| 1743.639965 | 68.579992  | 1.54775E-06 | 0.002698727 |
| 1743.679965 | 73.741628  | 1.66425E-06 | 0.002901912 |
| 1743.719965 | 87.049897  | 1.96459E-06 | 0.003425703 |
| 1743.759965 | 109.596671 | 2.47344E-06 | 0.004313093 |
| 1743.799965 | 121.874022 | 2.75053E-06 | 0.004796369 |
| 1743.839965 | 117.186583 | 2.64474E-06 | 0.004612    |
| 1743.879965 | 110.035622 | 2.48335E-06 | 0.004330666 |
| 1743.919965 | 119.31192  | 2.6927E-06  | 0.00469586  |
| 1743.959965 | 117.871517 | 2.6602E-06  | 0.004639275 |
| 1743.999965 | 111.215933 | 2.50999E-06 | 0.00437742  |
| 1744.039965 | 94.848434  | 2.1406E-06  | 0.003733287 |
| 1744.079965 | 98.712466  | 2.2278E-06  | 0.003885466 |
| 1744.119965 | 99.7723    | 2.25172E-06 | 0.003927273 |
| 1744.159965 | 92.000843  | 2.07633E-06 | 0.003621453 |
| 1744.199965 | 92.868226  | 2.09591E-06 | 0.00365568  |
| 1744.239965 | 99.818133  | 2.25276E-06 | 0.003929347 |
| 1744.279965 | 100.923657 | 2.27771E-06 | 0.003972958 |
| 1744.319965 | 103.218197 | 2.32949E-06 | 0.004063378 |
| 1744.359965 | 104.492803 | 2.35826E-06 | 0.004113649 |
| 1744.399965 | 101.49443  | 2.29059E-06 | 0.003995701 |
| 1744.439965 | 92.980008  | 2.09843E-06 | 0.003660584 |
| 1744.479965 | 107.855504 | 2.43415E-06 | 0.004246323 |
| 1744.519965 | 110.30996  | 2.48954E-06 | 0.004343056 |
| 1744.559965 | 98.082594  | 2.21359E-06 | 0.003861736 |
| 1744.599965 | 86.660684  | 1.95581E-06 | 0.003412108 |
| 1744.639965 | 77.870804  | 1.75744E-06 | 0.003066092 |
| 1744.679965 | 82.94268   | 1.8719E-06  | 0.003265868 |
| 1744.719965 | 82.613046  | 1.86446E-06 | 0.003252963 |
| 1744.759965 | 81.125828  | 1.8309E-06  | 0.003194476 |
| 1744.799965 | 94.299004  | 2.1282E-06  | 0.003713278 |
| 1744.839965 | 105.122654 | 2.37247E-06 | 0.004139584 |
| 1744.879965 | 109.38762  | 2.46873E-06 | 0.004307631 |
| 1744.919965 | 114.264324 | 2.57879E-06 | 0.004499776 |
| 1744.959965 | 108.975814 | 2.45943E-06 | 0.004291611 |
| 1744.999965 | 83.797077  | 1.89118E-06 | 0.003300115 |
| 1745.039965 | 78.764342  | 1.7776E-06  | 0.003101986 |
| 1745.079965 | 86.861833  | 1.96035E-06 | 0.003420969 |
| 1745.119965 | 102.538153 | 2.31414E-06 | 0.004038458 |
| 1745.159965 | 103.423123 | 2.33412E-06 | 0.004073405 |
| 1745.199965 | 97.110181  | 2.19164E-06 | 0.003824853 |
| 1745.239965 | 98.999936  | 2.23429E-06 | 0.003899373 |
| 1745.279965 | 94.957411  | 2.14306E-06 | 0.003740234 |

|             |            |             |             |
|-------------|------------|-------------|-------------|
| 1745.319965 | 99.319513  | 2.2415E-06  | 0.00391214  |
| 1745.359965 | 111.423982 | 2.51468E-06 | 0.004389029 |
| 1745.399965 | 99.7147    | 2.25042E-06 | 0.003927886 |
| 1745.439965 | 89.434496  | 2.01841E-06 | 0.003523017 |
| 1745.479965 | 87.601914  | 1.97705E-06 | 0.003450907 |
| 1745.519965 | 90.07866   | 2.03295E-06 | 0.003548555 |
| 1745.559965 | 91.716397  | 2.06991E-06 | 0.003613154 |
| 1745.599965 | 83.495564  | 1.88438E-06 | 0.003289371 |
| 1745.639965 | 74.11694   | 1.67272E-06 | 0.00291996  |
| 1745.679965 | 80.516707  | 1.81715E-06 | 0.003172162 |
| 1745.719965 | 99.986174  | 2.25655E-06 | 0.003939302 |
| 1745.759965 | 110.446997 | 2.49263E-06 | 0.004351542 |
| 1745.799965 | 113.070381 | 2.55184E-06 | 0.004455004 |
| 1745.839965 | 122.994662 | 2.77582E-06 | 0.004846134 |
| 1745.879965 | 124.143713 | 2.80175E-06 | 0.00489152  |
| 1745.919965 | 106.341734 | 2.39998E-06 | 0.004190181 |
| 1745.959965 | 93.989379  | 2.12121E-06 | 0.003703547 |
| 1745.999965 | 89.455665  | 2.01889E-06 | 0.003524981 |
| 1746.039965 | 94.073838  | 2.12312E-06 | 0.003707044 |
| 1746.079965 | 102.045985 | 2.30304E-06 | 0.004021285 |
| 1746.119965 | 98.701401  | 2.22755E-06 | 0.003889575 |
| 1746.159965 | 117.594541 | 2.65394E-06 | 0.004634212 |
| 1746.199965 | 117.500144 | 2.65181E-06 | 0.004630599 |
| 1746.239965 | 118.869093 | 2.68271E-06 | 0.004684655 |
| 1746.279965 | 115.074366 | 2.59707E-06 | 0.004535208 |
| 1746.319965 | 133.367919 | 3.00993E-06 | 0.005256298 |
| 1746.359965 | 141.448    | 3.19228E-06 | 0.005574878 |
| 1746.399965 | 115.210903 | 2.60015E-06 | 0.004540901 |
| 1746.439965 | 111.780975 | 2.52274E-06 | 0.004405816 |
| 1746.479965 | 107.564726 | 2.42759E-06 | 0.00423973  |
| 1746.519965 | 97.949484  | 2.21058E-06 | 0.003860828 |
| 1746.559965 | 105.431019 | 2.37943E-06 | 0.004155819 |
| 1746.599965 | 114.455613 | 2.5831E-06  | 0.004511649 |
| 1746.639965 | 99.644398  | 2.24884E-06 | 0.003927906 |
| 1746.679965 | 80.584426  | 1.81868E-06 | 0.003176649 |
| 1746.719965 | 79.211347  | 1.78769E-06 | 0.003122593 |
| 1746.759965 | 86.621531  | 1.95493E-06 | 0.003414789 |
| 1746.799965 | 93.801614  | 2.11697E-06 | 0.003697926 |
| 1746.839965 | 104.95066  | 2.36859E-06 | 0.004137548 |
| 1746.879965 | 112.635764 | 2.54203E-06 | 0.004440625 |
| 1746.919965 | 104.130838 | 2.35009E-06 | 0.004105416 |
| 1746.959965 | 94.392038  | 2.1303E-06  | 0.003721543 |
| 1746.999965 | 87.014198  | 1.96379E-06 | 0.00343074  |
| 1747.039965 | 81.971263  | 1.84998E-06 | 0.003231984 |
| 1747.079965 | 90.961617  | 2.05288E-06 | 0.00358654  |
| 1747.119965 | 101.116166 | 2.28205E-06 | 0.003987017 |

|             |            |             |             |
|-------------|------------|-------------|-------------|
| 1747.159965 | 99.126088  | 2.23714E-06 | 0.003908637 |
| 1747.199965 | 104.463074 | 2.35759E-06 | 0.004119174 |
| 1747.239965 | 101.59095  | 2.29277E-06 | 0.004006013 |
| 1747.279965 | 92.919734  | 2.09707E-06 | 0.003664167 |
| 1747.319965 | 104.382558 | 2.35577E-06 | 0.004116282 |
| 1747.359965 | 109.873134 | 2.47968E-06 | 0.0043329   |
| 1747.399965 | 104.997798 | 2.36965E-06 | 0.004140733 |
| 1747.439965 | 103.990079 | 2.34691E-06 | 0.004101086 |
| 1747.479965 | 113.765704 | 2.56753E-06 | 0.004486713 |
| 1747.519965 | 120.266861 | 2.71426E-06 | 0.004743216 |
| 1747.559965 | 133.638165 | 3.01603E-06 | 0.005270688 |
| 1747.599965 | 117.241953 | 2.64599E-06 | 0.004624128 |
| 1747.639965 | 100.314368 | 2.26396E-06 | 0.003956579 |
| 1747.679965 | 92.378238  | 2.08485E-06 | 0.003643647 |
| 1747.719965 | 93.80393   | 2.11702E-06 | 0.003699965 |
| 1747.759965 | 109.684301 | 2.47542E-06 | 0.004326443 |
| 1747.799965 | 127.643937 | 2.88075E-06 | 0.005034968 |
| 1747.839965 | 123.436176 | 2.78578E-06 | 0.004869102 |
| 1747.879965 | 106.346683 | 2.4001E-06  | 0.004195081 |
| 1747.919965 | 94.568924  | 2.13429E-06 | 0.003730566 |
| 1747.959965 | 83.475041  | 1.88392E-06 | 0.003293009 |
| 1747.999965 | 72.923584  | 1.64578E-06 | 0.00287683  |
| 1748.039965 | 73.819328  | 1.666E-06   | 0.002912234 |
| 1748.079965 | 81.626558  | 1.8422E-06  | 0.003220309 |
| 1748.119965 | 83.292264  | 1.87979E-06 | 0.003286099 |
| 1748.159965 | 105.334207 | 2.37725E-06 | 0.004155807 |
| 1748.199965 | 121.032067 | 2.73153E-06 | 0.004775252 |
| 1748.239965 | 126.459512 | 2.85402E-06 | 0.004989503 |
| 1748.279965 | 119.047856 | 2.68674E-06 | 0.004697181 |
| 1748.319965 | 114.844134 | 2.59187E-06 | 0.004531422 |
| 1748.359965 | 124.310463 | 2.80551E-06 | 0.004905048 |
| 1748.399965 | 127.210236 | 2.87096E-06 | 0.005019583 |
| 1748.439965 | 117.50934  | 2.65202E-06 | 0.004636901 |
| 1748.479965 | 99.711162  | 2.25034E-06 | 0.003934678 |
| 1748.519965 | 88.232847  | 1.99129E-06 | 0.003481815 |
| 1748.559965 | 84.783875  | 1.91345E-06 | 0.003345789 |
| 1748.599965 | 91.101345  | 2.05603E-06 | 0.003595175 |
| 1748.639965 | 101.115505 | 2.28204E-06 | 0.00399046  |
| 1748.679965 | 94.605177  | 2.13511E-06 | 0.003733619 |
| 1748.719965 | 96.032692  | 2.16732E-06 | 0.003790043 |
| 1748.759965 | 106.296047 | 2.39895E-06 | 0.004195194 |
| 1748.799965 | 103.922986 | 2.3454E-06  | 0.00410163  |
| 1748.839965 | 84.988182  | 1.91806E-06 | 0.003354389 |
| 1748.879965 | 81.752686  | 1.84504E-06 | 0.003226761 |
| 1748.919965 | 105.756126 | 2.38677E-06 | 0.004174267 |
| 1748.959965 | 124.334658 | 2.80606E-06 | 0.004907687 |

|             |            |             |             |
|-------------|------------|-------------|-------------|
| 1748.999965 | 117.603542 | 2.65415E-06 | 0.004642105 |
| 1749.039965 | 113.610866 | 2.56404E-06 | 0.004484607 |
| 1749.079965 | 113.609923 | 2.56402E-06 | 0.004484672 |
| 1749.119965 | 113.698641 | 2.56602E-06 | 0.004488277 |
| 1749.159965 | 111.31585  | 2.51224E-06 | 0.004394316 |
| 1749.199965 | 107.222959 | 2.41987E-06 | 0.004232841 |
| 1749.239965 | 93.94122   | 2.12012E-06 | 0.003708603 |
| 1749.279965 | 99.885018  | 2.25427E-06 | 0.003943342 |
| 1749.319965 | 116.259104 | 2.62381E-06 | 0.004589876 |
| 1749.359965 | 127.349973 | 2.87411E-06 | 0.005027856 |
| 1749.399965 | 119.550939 | 2.6981E-06  | 0.004720053 |
| 1749.439965 | 103.467357 | 2.33511E-06 | 0.004085142 |
| 1749.479965 | 93.097439  | 2.10108E-06 | 0.003675797 |
| 1749.519965 | 84.395744  | 1.90469E-06 | 0.003332301 |
| 1749.559965 | 92.650734  | 2.091E-06   | 0.003658326 |
| 1749.599965 | 87.984727  | 1.98569E-06 | 0.003474168 |
| 1749.639965 | 82.03942   | 1.85152E-06 | 0.003239485 |
| 1749.679965 | 93.906745  | 2.11934E-06 | 0.003708174 |
| 1749.719965 | 111.009941 | 2.50534E-06 | 0.004383643 |
| 1749.759965 | 106.848317 | 2.41142E-06 | 0.004219402 |
| 1749.799965 | 85.972985  | 1.94029E-06 | 0.00339512  |
| 1749.839965 | 78.756888  | 1.77743E-06 | 0.003110224 |
| 1749.879965 | 83.338848  | 1.88084E-06 | 0.003291247 |
| 1749.919965 | 91.317942  | 2.06092E-06 | 0.003606443 |
| 1749.959965 | 95.078184  | 2.14578E-06 | 0.003755033 |
| 1749.999965 | 102.663835 | 2.31698E-06 | 0.004054714 |
| 1750.039965 | 105.198177 | 2.37418E-06 | 0.004154903 |
| 1750.079965 | 106.294383 | 2.39892E-06 | 0.004198295 |
| 1750.119965 | 104.453396 | 2.35737E-06 | 0.004125676 |
| 1750.159965 | 100.217325 | 2.26177E-06 | 0.003958451 |
| 1750.199965 | 91.338091  | 2.06137E-06 | 0.003607816 |
| 1750.239965 | 99.330201  | 2.24174E-06 | 0.00392359  |
| 1750.279965 | 103.996946 | 2.34707E-06 | 0.004108023 |
| 1750.319965 | 90.979548  | 2.05328E-06 | 0.0035939   |
| 1750.359965 | 93.510332  | 2.1104E-06  | 0.003693956 |
| 1750.399965 | 106.823476 | 2.41086E-06 | 0.004219964 |
| 1750.439965 | 103.050749 | 2.32571E-06 | 0.004071019 |
| 1750.479965 | 97.489668  | 2.20021E-06 | 0.003851417 |
| 1750.519965 | 90.396339  | 2.04012E-06 | 0.00357127  |
| 1750.559965 | 85.424034  | 1.9279E-06  | 0.003374907 |
| 1750.599965 | 102.402441 | 2.31108E-06 | 0.004045777 |
| 1750.639965 | 107.626192 | 2.42897E-06 | 0.004252258 |
| 1750.679965 | 92.364645  | 2.08454E-06 | 0.003649365 |
| 1750.719965 | 79.610757  | 1.7967E-06  | 0.003145525 |
| 1750.759965 | 70.975327  | 1.60181E-06 | 0.002804392 |
| 1750.799965 | 75.37788   | 1.70117E-06 | 0.002978415 |

|             |            |             |             |
|-------------|------------|-------------|-------------|
| 1750.839965 | 92.714114  | 2.09243E-06 | 0.003663507 |
| 1750.879965 | 90.948224  | 2.05257E-06 | 0.003593812 |
| 1750.919965 | 79.688458  | 1.79846E-06 | 0.003148955 |
| 1750.959965 | 98.768023  | 2.22906E-06 | 0.003902989 |
| 1750.999965 | 117.32756  | 2.64792E-06 | 0.004636507 |
| 1751.039965 | 112.109142 | 2.53015E-06 | 0.004430389 |
| 1751.079965 | 94.67013   | 2.13657E-06 | 0.00374131  |
| 1751.119965 | 85.200382  | 1.92285E-06 | 0.003367148 |
| 1751.159965 | 103.87037  | 2.34421E-06 | 0.004105086 |
| 1751.199965 | 111.646989 | 2.51972E-06 | 0.004412528 |
| 1751.239965 | 128.040265 | 2.88969E-06 | 0.005060541 |
| 1751.279965 | 136.105296 | 3.07171E-06 | 0.005379419 |
| 1751.319965 | 116.592928 | 2.63134E-06 | 0.004608318 |
| 1751.359965 | 112.170058 | 2.53152E-06 | 0.004433606 |
| 1751.399965 | 106.094966 | 2.39442E-06 | 0.004193579 |
| 1751.439965 | 109.558373 | 2.47258E-06 | 0.004330575 |
| 1751.479965 | 101.935131 | 2.30053E-06 | 0.004029339 |
| 1751.519965 | 89.822613  | 2.02717E-06 | 0.003550631 |
| 1751.559965 | 91.266679  | 2.05976E-06 | 0.003607796 |
| 1751.599965 | 109.398302 | 2.46897E-06 | 0.004324643 |
| 1751.639965 | 109.755093 | 2.47702E-06 | 0.004338846 |
| 1751.679965 | 90.713032  | 2.04727E-06 | 0.003586156 |
| 1751.719965 | 77.126741  | 1.74064E-06 | 0.003049119 |
| 1751.759965 | 77.339     | 1.74543E-06 | 0.003057581 |
| 1751.799965 | 89.506789  | 2.02004E-06 | 0.003538712 |
| 1751.839965 | 94.925623  | 2.14234E-06 | 0.003753035 |
| 1751.879965 | 91.267278  | 2.05978E-06 | 0.003608479 |
| 1751.919965 | 92.083354  | 2.07819E-06 | 0.003640828 |
| 1751.959965 | 100.000348 | 2.25687E-06 | 0.003953943 |
| 1751.999965 | 85.560867  | 1.93099E-06 | 0.003383094 |
| 1752.039965 | 96.332814  | 2.1741E-06  | 0.003809106 |
| 1752.079965 | 124.260137 | 2.80438E-06 | 0.004913495 |
| 1752.119965 | 120.772619 | 2.72567E-06 | 0.0047757   |
| 1752.159965 | 106.137947 | 2.39539E-06 | 0.004197099 |
| 1752.199965 | 109.719898 | 2.47623E-06 | 0.004338842 |
| 1752.239965 | 115.799822 | 2.61344E-06 | 0.004579375 |
| 1752.279965 | 113.892994 | 2.57041E-06 | 0.004504071 |
| 1752.319965 | 108.579773 | 2.45049E-06 | 0.00429405  |
| 1752.359965 | 98.590901  | 2.22506E-06 | 0.003899105 |
| 1752.399965 | 98.277211  | 2.21798E-06 | 0.003886788 |
| 1752.439965 | 103.083306 | 2.32645E-06 | 0.004076958 |
| 1752.479965 | 104.364169 | 2.35535E-06 | 0.004127711 |
| 1752.519965 | 90.489808  | 2.04223E-06 | 0.003579047 |
| 1752.559965 | 81.67449   | 1.84328E-06 | 0.003230458 |
| 1752.599965 | 86.64658   | 1.95549E-06 | 0.003427196 |
| 1752.639965 | 97.853766  | 2.20842E-06 | 0.003870571 |



|             |            |             |             |
|-------------|------------|-------------|-------------|
| 1752.679965 | 95.872615  | 2.16371E-06 | 0.003792294 |
| 1752.719965 | 106.518941 | 2.40398E-06 | 0.004213511 |
| 1752.759965 | 113.034518 | 2.55103E-06 | 0.004471346 |
| 1752.799965 | 122.753658 | 2.77038E-06 | 0.00485592  |
| 1752.839965 | 111.780918 | 2.52274E-06 | 0.004421959 |
| 1752.879965 | 101.011519 | 2.27969E-06 | 0.003996022 |
| 1752.919965 | 112.675481 | 2.54293E-06 | 0.00445755  |
| 1752.959965 | 147.297397 | 3.3243E-06  | 0.00582736  |
| 1752.999965 | 143.347395 | 3.23515E-06 | 0.00567122  |
| 1753.039965 | 105.025539 | 2.37028E-06 | 0.004155196 |
| 1753.079965 | 86.617603  | 1.95484E-06 | 0.003426988 |
| 1753.119965 | 83.728774  | 1.88964E-06 | 0.003312769 |
| 1753.159965 | 95.678619  | 2.15933E-06 | 0.003785656 |
| 1753.199965 | 107.26345  | 2.42079E-06 | 0.004244123 |
| 1753.239965 | 124.17104  | 2.80237E-06 | 0.004913223 |
| 1753.279965 | 133.258022 | 3.00745E-06 | 0.005272898 |
| 1753.319965 | 118.735437 | 2.67969E-06 | 0.00469836  |
| 1753.359965 | 110.34826  | 2.49041E-06 | 0.004366579 |
| 1753.399965 | 116.784605 | 2.63567E-06 | 0.004621376 |
| 1753.439965 | 123.015097 | 2.77628E-06 | 0.004868039 |
| 1753.479965 | 111.466487 | 2.51564E-06 | 0.00441113  |
| 1753.519965 | 95.343622  | 2.15177E-06 | 0.003773176 |
| 1753.559965 | 82.632632  | 1.8649E-06  | 0.00327022  |
| 1753.599965 | 80.030391  | 1.80617E-06 | 0.003167307 |
| 1753.639965 | 87.668111  | 1.97855E-06 | 0.003469659 |
| 1753.679965 | 101.516328 | 2.29108E-06 | 0.004017825 |
| 1753.719965 | 119.749745 | 2.70258E-06 | 0.004739577 |
| 1753.759965 | 118.884119 | 2.68305E-06 | 0.004705424 |
| 1753.799965 | 98.426885  | 2.22136E-06 | 0.003895817 |
| 1753.839965 | 93.781909  | 2.11653E-06 | 0.00371205  |
| 1753.879965 | 108.399916 | 2.44644E-06 | 0.004290754 |
| 1753.919965 | 114.908135 | 2.59332E-06 | 0.00454847  |
| 1753.959965 | 112.77813  | 2.54525E-06 | 0.004464258 |
| 1753.999965 | 104.564669 | 2.35988E-06 | 0.004139228 |
| 1754.039965 | 91.995346  | 2.07621E-06 | 0.00364175  |
| 1754.079965 | 71.525014  | 1.61422E-06 | 0.002831471 |
| 1754.119965 | 67.479835  | 1.52293E-06 | 0.002671395 |
| 1754.159965 | 80.790849  | 1.82334E-06 | 0.003198425 |
| 1754.199965 | 86.090226  | 1.94294E-06 | 0.003408299 |
| 1754.239965 | 98.154838  | 2.21522E-06 | 0.003886024 |
| 1754.279965 | 125.411708 | 2.83037E-06 | 0.004965257 |
| 1754.319965 | 130.898004 | 2.95419E-06 | 0.005182587 |
| 1754.359965 | 109.60824  | 2.47371E-06 | 0.00433977  |
| 1754.399965 | 95.974003  | 2.166E-06   | 0.00380003  |
| 1754.439965 | 92.646391  | 2.0909E-06  | 0.003668359 |
| 1754.479965 | 103.779637 | 2.34216E-06 | 0.004109276 |

|             |            |             |             |
|-------------|------------|-------------|-------------|
| 1754.519965 | 121.969818 | 2.75269E-06 | 0.004829648 |
| 1754.559965 | 115.975817 | 2.61741E-06 | 0.004592407 |
| 1754.599965 | 99.735605  | 2.25089E-06 | 0.003949418 |
| 1754.639965 | 95.918472  | 2.16475E-06 | 0.00379835  |
| 1754.679965 | 100.050589 | 2.258E-06   | 0.003962072 |
| 1754.719965 | 108.856772 | 2.45675E-06 | 0.004310901 |
| 1754.759965 | 113.274907 | 2.55646E-06 | 0.004485968 |
| 1754.799965 | 104.522172 | 2.35892E-06 | 0.004139432 |
| 1754.839965 | 118.352513 | 2.67105E-06 | 0.004687268 |
| 1754.879965 | 135.575649 | 3.05975E-06 | 0.0053695   |
| 1754.919965 | 117.365727 | 2.64878E-06 | 0.004648399 |
| 1754.959965 | 101.989838 | 2.30177E-06 | 0.004039512 |
| 1754.999965 | 112.268072 | 2.53373E-06 | 0.004446703 |
| 1755.039965 | 119.572539 | 2.69859E-06 | 0.004736126 |
| 1755.079965 | 103.43209  | 2.33432E-06 | 0.004096915 |
| 1755.119965 | 89.294924  | 2.01526E-06 | 0.003537027 |
| 1755.159965 | 97.196036  | 2.19358E-06 | 0.003850082 |
| 1755.199965 | 99.688576  | 2.24983E-06 | 0.003948906 |
| 1755.239965 | 100.085071 | 2.25878E-06 | 0.003964702 |
| 1755.279965 | 97.564616  | 2.2019E-06  | 0.003864947 |
| 1755.319965 | 92.328148  | 2.08372E-06 | 0.003657591 |
| 1755.359965 | 98.75434   | 2.22875E-06 | 0.003912255 |
| 1755.399965 | 109.890495 | 2.48008E-06 | 0.004353524 |
| 1755.439965 | 120.979973 | 2.73035E-06 | 0.004792965 |
| 1755.479965 | 106.78789  | 2.41005E-06 | 0.004230801 |
| 1755.519965 | 92.798089  | 2.09432E-06 | 0.003676627 |
| 1755.559965 | 81.959164  | 1.8497E-06  | 0.003247267 |
| 1755.599965 | 75.899283  | 1.71294E-06 | 0.003007239 |
| 1755.639965 | 85.623871  | 1.93241E-06 | 0.003392619 |
| 1755.679965 | 84.954988  | 1.91732E-06 | 0.003366193 |
| 1755.719965 | 94.204213  | 2.12606E-06 | 0.003732762 |
| 1755.759965 | 110.336174 | 2.49013E-06 | 0.004372077 |
| 1755.799965 | 103.311157 | 2.33159E-06 | 0.004093804 |
| 1755.839965 | 87.66094   | 1.97839E-06 | 0.003473728 |
| 1755.879965 | 94.876427  | 2.14123E-06 | 0.003759741 |
| 1755.919965 | 107.45229  | 2.42505E-06 | 0.004258191 |
| 1755.959965 | 109.810564 | 2.47827E-06 | 0.004351745 |
| 1755.999965 | 114.93199  | 2.59385E-06 | 0.004554809 |
| 1756.039965 | 112.097923 | 2.52989E-06 | 0.004442595 |
| 1756.079965 | 102.384065 | 2.31067E-06 | 0.004057714 |
| 1756.119965 | 109.935027 | 2.48108E-06 | 0.004357075 |
| 1756.159965 | 112.313004 | 2.53475E-06 | 0.004451423 |
| 1756.199965 | 103.712862 | 2.34065E-06 | 0.004110658 |
| 1756.239965 | 90.83476   | 2.05001E-06 | 0.003600317 |
| 1756.279965 | 105.405857 | 2.37886E-06 | 0.00417795  |
| 1756.319965 | 115.688546 | 2.61093E-06 | 0.004585627 |

|             |            |             |             |
|-------------|------------|-------------|-------------|
| 1756.359965 | 111.569773 | 2.51797E-06 | 0.004422469 |
| 1756.399965 | 116.21534  | 2.62282E-06 | 0.004606718 |
| 1756.439965 | 110.52846  | 2.49447E-06 | 0.004381393 |
| 1756.479965 | 101.769938 | 2.29681E-06 | 0.004034293 |
| 1756.519965 | 103.111156 | 2.32708E-06 | 0.004087554 |
| 1756.559965 | 104.827992 | 2.36582E-06 | 0.004155708 |
| 1756.599965 | 113.712163 | 2.56633E-06 | 0.004508007 |
| 1756.639965 | 114.191452 | 2.57714E-06 | 0.004527111 |
| 1756.679965 | 103.45957  | 2.33494E-06 | 0.004101739 |
| 1756.719965 | 100.25136  | 2.26253E-06 | 0.003974638 |
| 1756.759965 | 115.287427 | 2.60188E-06 | 0.004570873 |
| 1756.799965 | 118.423815 | 2.67266E-06 | 0.00469533  |
| 1756.839965 | 118.0978   | 2.6653E-06  | 0.004682511 |
| 1756.879965 | 118.009    | 2.6633E-06  | 0.004679096 |
| 1756.919965 | 110.631021 | 2.49679E-06 | 0.004386657 |
| 1756.959965 | 104.083625 | 2.34902E-06 | 0.004127138 |
| 1756.999965 | 96.797647  | 2.18459E-06 | 0.003838321 |
| 1757.039965 | 90.358765  | 2.03927E-06 | 0.003583081 |
| 1757.079965 | 87.97249   | 1.98542E-06 | 0.003488536 |
| 1757.119965 | 82.566586  | 1.86341E-06 | 0.00327424  |
| 1757.159965 | 84.099409  | 1.89801E-06 | 0.003335101 |
| 1757.199965 | 89.209845  | 2.01334E-06 | 0.003537844 |
| 1757.239965 | 99.958461  | 2.25592E-06 | 0.003964198 |
| 1757.279965 | 104.500807 | 2.35844E-06 | 0.004144435 |
| 1757.319965 | 101.764533 | 2.29668E-06 | 0.004036008 |
| 1757.359965 | 94.485582  | 2.13241E-06 | 0.003747408 |
| 1757.399965 | 90.152144  | 2.03461E-06 | 0.003575621 |
| 1757.439965 | 97.420639  | 2.19865E-06 | 0.003863992 |
| 1757.479965 | 94.990227  | 2.1438E-06  | 0.00376768  |
| 1757.519965 | 85.517351  | 1.93001E-06 | 0.003392027 |
| 1757.559965 | 86.734278  | 1.95747E-06 | 0.003440374 |
| 1757.599965 | 93.085708  | 2.10081E-06 | 0.003692392 |
| 1757.639965 | 109.571336 | 2.47287E-06 | 0.004346419 |
| 1757.679965 | 119.717521 | 2.70186E-06 | 0.004749001 |
| 1757.719965 | 120.344753 | 2.71601E-06 | 0.004773991 |
| 1757.759965 | 112.682093 | 2.54308E-06 | 0.00447012  |
| 1757.799965 | 102.589704 | 2.31531E-06 | 0.004069846 |
| 1757.839965 | 103.895581 | 2.34478E-06 | 0.004121745 |
| 1757.879965 | 111.764646 | 2.52237E-06 | 0.004434028 |
| 1757.919965 | 115.806769 | 2.6136E-06  | 0.004594495 |
| 1757.959965 | 100.024256 | 2.25741E-06 | 0.003968433 |
| 1757.999965 | 84.971359  | 1.91769E-06 | 0.003371291 |
| 1758.039965 | 70.236687  | 1.58514E-06 | 0.002786747 |
| 1758.079965 | 71.105397  | 1.60475E-06 | 0.002821278 |
| 1758.119965 | 102.124887 | 2.30482E-06 | 0.004052144 |
| 1758.159965 | 118.203786 | 2.66769E-06 | 0.004690234 |

|             |            |             |             |
|-------------|------------|-------------|-------------|
| 1758.199965 | 115.974365 | 2.61738E-06 | 0.004601877 |
| 1758.239965 | 104.03754  | 2.34798E-06 | 0.004128316 |
| 1758.279965 | 101.767777 | 2.29676E-06 | 0.004038342 |
| 1758.319965 | 99.566958  | 2.24709E-06 | 0.003951099 |
| 1758.359965 | 89.468601  | 2.01918E-06 | 0.003550448 |
| 1758.399965 | 99.85207   | 2.25352E-06 | 0.003962593 |
| 1758.439965 | 116.857893 | 2.63732E-06 | 0.004637569 |
| 1758.479965 | 114.466441 | 2.58335E-06 | 0.004542766 |
| 1758.519965 | 121.449145 | 2.74094E-06 | 0.004819994 |
| 1758.559965 | 132.188393 | 2.98331E-06 | 0.005246326 |
| 1758.599965 | 128.600867 | 2.90234E-06 | 0.005104059 |
| 1758.639965 | 111.576294 | 2.51812E-06 | 0.004428469 |
| 1758.679965 | 105.62425  | 2.38379E-06 | 0.004192328 |
| 1758.719965 | 94.977248  | 2.1435E-06  | 0.003769824 |
| 1758.759965 | 109.488586 | 2.471E-06   | 0.004345904 |
| 1758.799965 | 112.30236  | 2.53451E-06 | 0.004457692 |
| 1758.839965 | 99.63579   | 2.24864E-06 | 0.003955    |
| 1758.879965 | 92.549159  | 2.08871E-06 | 0.003673782 |
| 1758.919965 | 89.438614  | 2.0185E-06  | 0.003550389 |
| 1758.959965 | 94.502932  | 2.1328E-06  | 0.003751509 |
| 1758.999965 | 104.706744 | 2.36309E-06 | 0.004156667 |
| 1759.039965 | 102.895138 | 2.3222E-06  | 0.004084843 |
| 1759.079965 | 99.455145  | 2.24456E-06 | 0.003948368 |
| 1759.119965 | 105.600123 | 2.38325E-06 | 0.004192419 |
| 1759.159965 | 106.806701 | 2.41048E-06 | 0.004240417 |
| 1759.199965 | 100.196567 | 2.2613E-06  | 0.003978074 |
| 1759.239965 | 103.048891 | 2.32567E-06 | 0.004091411 |
| 1759.279965 | 123.841721 | 2.79494E-06 | 0.004917073 |
| 1759.319965 | 139.178661 | 3.14107E-06 | 0.005526145 |
| 1759.359965 | 129.131732 | 2.91432E-06 | 0.005127344 |
| 1759.399965 | 122.878573 | 2.7732E-06  | 0.004879165 |
| 1759.439965 | 132.315978 | 2.98619E-06 | 0.005254017 |
| 1759.479965 | 125.004795 | 2.82118E-06 | 0.004963817 |
| 1759.519965 | 110.151813 | 2.48597E-06 | 0.004374119 |
| 1759.559965 | 98.374697  | 2.22018E-06 | 0.00390654  |
| 1759.599965 | 90.078509  | 2.03295E-06 | 0.003577173 |
| 1759.639965 | 86.958373  | 1.96253E-06 | 0.003453345 |
| 1759.679965 | 96.302785  | 2.17342E-06 | 0.003824523 |
| 1759.719965 | 103.598091 | 2.33806E-06 | 0.004114339 |
| 1759.759965 | 101.330653 | 2.28689E-06 | 0.00402438  |
| 1759.799965 | 89.870256  | 2.02825E-06 | 0.003569308 |
| 1759.839965 | 95.446302  | 2.15409E-06 | 0.003790854 |
| 1759.879965 | 110.554935 | 2.49507E-06 | 0.004391025 |
| 1759.919965 | 117.392405 | 2.64938E-06 | 0.004662702 |
| 1759.959965 | 126.483354 | 2.85455E-06 | 0.005023899 |
| 1759.999965 | 140.989146 | 3.18193E-06 | 0.005600194 |

|             |            |             |             |
|-------------|------------|-------------|-------------|
| 1760.039965 | 129.27268  | 2.9175E-06  | 0.005134924 |
| 1760.079965 | 114.241933 | 2.57828E-06 | 0.004537981 |
| 1760.119965 | 120.488849 | 2.71927E-06 | 0.004786233 |
| 1760.159965 | 127.493038 | 2.87734E-06 | 0.005064579 |
| 1760.199965 | 127.846874 | 2.88533E-06 | 0.00507875  |
| 1760.239965 | 119.001179 | 2.68569E-06 | 0.00472746  |
| 1760.279965 | 116.740947 | 2.63468E-06 | 0.004637775 |
| 1760.319965 | 111.476022 | 2.51586E-06 | 0.004428716 |
| 1760.359965 | 109.395548 | 2.46891E-06 | 0.004346162 |
| 1760.399965 | 114.03682  | 2.57365E-06 | 0.004530657 |
| 1760.439965 | 108.714693 | 2.45354E-06 | 0.004319308 |
| 1760.479965 | 107.270486 | 2.42095E-06 | 0.004262026 |
| 1760.519965 | 96.170588  | 2.17044E-06 | 0.003821096 |
| 1760.559965 | 81.109942  | 1.83054E-06 | 0.003222773 |
| 1760.599965 | 77.676385  | 1.75305E-06 | 0.003086416 |
| 1760.639965 | 90.461493  | 2.04159E-06 | 0.003594505 |
| 1760.679965 | 111.315556 | 2.51224E-06 | 0.004423245 |
| 1760.719965 | 104.937619 | 2.3683E-06  | 0.004169906 |
| 1760.759965 | 94.331998  | 2.12894E-06 | 0.003748555 |
| 1760.799965 | 95.561209  | 2.15668E-06 | 0.003797488 |
| 1760.839965 | 89.005923  | 2.00874E-06 | 0.003537069 |
| 1760.879965 | 90.169089  | 2.03499E-06 | 0.003583374 |
| 1760.919965 | 105.216037 | 2.37458E-06 | 0.004181444 |
| 1760.959965 | 127.604809 | 2.87986E-06 | 0.005071323 |
| 1760.999965 | 130.374852 | 2.94238E-06 | 0.005181529 |
| 1761.039965 | 103.824968 | 2.34318E-06 | 0.004126442 |
| 1761.079965 | 88.037975  | 1.98689E-06 | 0.00349908  |
| 1761.119965 | 94.152438  | 2.12489E-06 | 0.003742185 |
| 1761.159965 | 102.052292 | 2.30318E-06 | 0.004056265 |
| 1761.199965 | 100.213249 | 2.26167E-06 | 0.003983259 |
| 1761.239965 | 96.341645  | 2.1743E-06  | 0.003829458 |
| 1761.279965 | 104.107217 | 2.34955E-06 | 0.004138224 |
| 1761.319965 | 110.765986 | 2.49983E-06 | 0.004403008 |
| 1761.359965 | 110.789178 | 2.50036E-06 | 0.004404029 |
| 1761.399965 | 89.8495    | 2.02778E-06 | 0.003571728 |
| 1761.439965 | 72.545961  | 1.63726E-06 | 0.002883937 |
| 1761.479965 | 78.645325  | 1.77492E-06 | 0.003126478 |
| 1761.519965 | 66.698444  | 1.50529E-06 | 0.0026516   |
| 1761.559965 | 61.727934  | 1.39311E-06 | 0.002454053 |
| 1761.599965 | 78.154156  | 1.76383E-06 | 0.003107164 |
| 1761.639965 | 83.568591  | 1.88603E-06 | 0.0033225   |
| 1761.679965 | 79.277394  | 1.78918E-06 | 0.003151963 |
| 1761.719965 | 87.438955  | 1.97338E-06 | 0.003476535 |
| 1761.759965 | 105.150032 | 2.37309E-06 | 0.004180815 |
| 1761.799965 | 98.236725  | 2.21707E-06 | 0.003906027 |
| 1761.839965 | 87.311159  | 1.97049E-06 | 0.00347169  |

|             |            |             |             |
|-------------|------------|-------------|-------------|
| 1761.879965 | 81.025966  | 1.82864E-06 | 0.00322185  |
| 1761.919965 | 81.682923  | 1.84347E-06 | 0.003248046 |
| 1761.959965 | 75.967328  | 1.71448E-06 | 0.003020839 |
| 1761.999965 | 74.728689  | 1.68652E-06 | 0.002971652 |
| 1762.039965 | 100.493932 | 2.26801E-06 | 0.003996321 |
| 1762.079965 | 127.437432 | 2.87609E-06 | 0.005067892 |
| 1762.119965 | 134.120051 | 3.0269E-06  | 0.005333766 |
| 1762.159965 | 107.412868 | 2.42416E-06 | 0.004271756 |
| 1762.199965 | 79.155856  | 1.78644E-06 | 0.00314806  |
| 1762.239965 | 80.477414  | 1.81626E-06 | 0.003200691 |
| 1762.279965 | 91.065163  | 2.05521E-06 | 0.003621862 |
| 1762.319965 | 105.82834  | 2.3884E-06  | 0.004209122 |
| 1762.359965 | 101.263337 | 2.28537E-06 | 0.004027649 |
| 1762.399965 | 103.839583 | 2.34351E-06 | 0.00413021  |
| 1762.439965 | 109.6931   | 2.47562E-06 | 0.004363132 |
| 1762.479965 | 105.989972 | 2.39205E-06 | 0.004215933 |
| 1762.519965 | 88.334749  | 1.99359E-06 | 0.003513746 |
| 1762.559965 | 83.963214  | 1.89493E-06 | 0.003339933 |
| 1762.599965 | 105.145803 | 2.37299E-06 | 0.00418264  |
| 1762.639965 | 92.876367  | 2.09609E-06 | 0.003694652 |
| 1762.679965 | 81.778946  | 1.84564E-06 | 0.003253267 |
| 1762.719965 | 93.129085  | 2.10179E-06 | 0.003704874 |
| 1762.759965 | 97.383767  | 2.19782E-06 | 0.003874222 |
| 1762.799965 | 84.606215  | 1.90944E-06 | 0.003365969 |
| 1762.839965 | 72.559123  | 1.63756E-06 | 0.002886753 |
| 1762.879965 | 65.424169  | 1.47653E-06 | 0.002602949 |
| 1762.919965 | 78.496299  | 1.77155E-06 | 0.003123105 |
| 1762.959965 | 93.398443  | 2.10787E-06 | 0.003716095 |
| 1762.999965 | 100.462787 | 2.26731E-06 | 0.003997259 |
| 1763.039965 | 102.864058 | 2.3215E-06  | 0.004092895 |
| 1763.079965 | 98.135738  | 2.21479E-06 | 0.003904846 |
| 1763.119965 | 109.435029 | 2.4698E-06  | 0.004354547 |
| 1763.159965 | 128.126319 | 2.89163E-06 | 0.005098411 |
| 1763.199965 | 128.134916 | 2.89183E-06 | 0.005098869 |
| 1763.239965 | 123.343881 | 2.7837E-06  | 0.00490833  |
| 1763.279965 | 109.9474   | 2.48136E-06 | 0.004375332 |
| 1763.319965 | 85.487028  | 1.92932E-06 | 0.003402014 |
| 1763.359965 | 87.259018  | 1.96931E-06 | 0.00347261  |
| 1763.399965 | 107.679357 | 2.43017E-06 | 0.004285367 |
| 1763.439965 | 109.347725 | 2.46783E-06 | 0.004351863 |
| 1763.479965 | 112.960626 | 2.54936E-06 | 0.004495752 |
| 1763.519965 | 122.395528 | 2.7623E-06  | 0.004871365 |
| 1763.559965 | 113.814959 | 2.56865E-06 | 0.00452996  |
| 1763.599965 | 95.767529  | 2.16134E-06 | 0.003811739 |
| 1763.639965 | 92.7051    | 2.09222E-06 | 0.003689932 |
| 1763.679965 | 101.351354 | 2.28736E-06 | 0.004034169 |

|             |            |             |             |
|-------------|------------|-------------|-------------|
| 1763.719965 | 104.970827 | 2.36905E-06 | 0.004178333 |
| 1763.759965 | 112.599285 | 2.54121E-06 | 0.004482083 |
| 1763.799965 | 111.35318  | 2.51309E-06 | 0.004432581 |
| 1763.839965 | 103.718373 | 2.34078E-06 | 0.00412876  |
| 1763.879965 | 100.832048 | 2.27564E-06 | 0.004013954 |
| 1763.919965 | 88.92579   | 2.00693E-06 | 0.003540066 |
| 1763.959965 | 82.58147   | 1.86375E-06 | 0.003287578 |
| 1763.999965 | 83.329452  | 1.88063E-06 | 0.003317431 |
| 1764.039965 | 90.672766  | 2.04636E-06 | 0.003609857 |
| 1764.079965 | 93.258446  | 2.10471E-06 | 0.003712882 |
| 1764.119965 | 109.029039 | 2.46063E-06 | 0.004340853 |
| 1764.159965 | 112.999842 | 2.55025E-06 | 0.004499047 |
| 1764.199965 | 97.650402  | 2.20383E-06 | 0.003888003 |
| 1764.239965 | 84.362308  | 1.90394E-06 | 0.003359007 |
| 1764.279965 | 82.900832  | 1.87096E-06 | 0.003300891 |
| 1764.319965 | 83.201817  | 1.87775E-06 | 0.00331295  |
| 1764.359965 | 85.169673  | 1.92216E-06 | 0.003391384 |
| 1764.399965 | 94.176751  | 2.12544E-06 | 0.003750123 |
| 1764.439965 | 96.501721  | 2.17791E-06 | 0.00384279  |
| 1764.479965 | 96.657     | 2.18141E-06 | 0.003849061 |
| 1764.519965 | 82.883411  | 1.87056E-06 | 0.003300646 |
| 1764.559965 | 77.459736  | 1.74816E-06 | 0.00308473  |
| 1764.599965 | 92.577689  | 2.08935E-06 | 0.003686866 |
| 1764.639965 | 98.305612  | 2.21862E-06 | 0.003915067 |
| 1764.679965 | 109.25598  | 2.46576E-06 | 0.004351269 |
| 1764.719965 | 104.870752 | 2.36679E-06 | 0.004176716 |
| 1764.759965 | 92.40695   | 2.0855E-06  | 0.0036804   |
| 1764.799965 | 78.025256  | 1.76092E-06 | 0.003107674 |
| 1764.839965 | 76.756299  | 1.73228E-06 | 0.003057202 |
| 1764.879965 | 104.603933 | 2.36077E-06 | 0.004166467 |
| 1764.919965 | 124.552148 | 2.81097E-06 | 0.004961134 |
| 1764.959965 | 108.609581 | 2.45117E-06 | 0.004326212 |
| 1764.999965 | 92.160329  | 2.07993E-06 | 0.003671077 |
| 1765.039965 | 82.937199  | 1.87178E-06 | 0.003303761 |
| 1765.079965 | 89.249062  | 2.01423E-06 | 0.003555272 |
| 1765.119965 | 95.19446   | 2.14841E-06 | 0.003792195 |
| 1765.159965 | 95.886547  | 2.16403E-06 | 0.003819852 |
| 1765.199965 | 97.665795  | 2.20418E-06 | 0.00389082  |
| 1765.239965 | 106.420291 | 2.40176E-06 | 0.004239679 |
| 1765.279965 | 116.500546 | 2.62926E-06 | 0.004641371 |
| 1765.319965 | 112.552238 | 2.54015E-06 | 0.004484173 |
| 1765.359965 | 111.22255  | 2.51014E-06 | 0.004431297 |
| 1765.399965 | 105.06728  | 2.37122E-06 | 0.004186156 |
| 1765.439965 | 104.158863 | 2.35072E-06 | 0.004150056 |
| 1765.479965 | 99.901962  | 2.25465E-06 | 0.003980536 |
| 1765.519965 | 108.339654 | 2.44508E-06 | 0.004316829 |

|             |            |             |             |
|-------------|------------|-------------|-------------|
| 1765.559965 | 113.543857 | 2.56253E-06 | 0.004524295 |
| 1765.599965 | 100.633136 | 2.27115E-06 | 0.004009942 |
| 1765.639965 | 82.251793  | 1.85631E-06 | 0.003277572 |
| 1765.679965 | 79.000421  | 1.78293E-06 | 0.003148083 |
| 1765.719965 | 80.912072  | 1.82607E-06 | 0.003224333 |
| 1765.759965 | 76.859612  | 1.73461E-06 | 0.003062913 |
| 1765.799965 | 80.898509  | 1.82577E-06 | 0.003223939 |
| 1765.839965 | 87.573931  | 1.97642E-06 | 0.003490044 |
| 1765.879965 | 90.209494  | 2.0359E-06  | 0.00359516  |
| 1765.919965 | 96.747641  | 2.18346E-06 | 0.003855815 |
| 1765.959965 | 96.078945  | 2.16837E-06 | 0.003829251 |
| 1765.999965 | 99.546721  | 2.24663E-06 | 0.00396755  |
| 1766.039965 | 92.835804  | 2.09517E-06 | 0.003700162 |
| 1766.079965 | 102.517607 | 2.31368E-06 | 0.004086143 |
| 1766.119965 | 118.335573 | 2.67067E-06 | 0.004716722 |
| 1766.159965 | 113.496171 | 2.56145E-06 | 0.004523931 |
| 1766.199965 | 115.32473  | 2.60272E-06 | 0.004596921 |
| 1766.239965 | 132.128085 | 2.98195E-06 | 0.005266834 |
| 1766.279965 | 136.918843 | 3.09007E-06 | 0.005457924 |
| 1766.319965 | 116.799037 | 2.63599E-06 | 0.004656005 |
| 1766.359965 | 98.68698   | 2.22723E-06 | 0.003934086 |
| 1766.399965 | 109.104865 | 2.46234E-06 | 0.004349486 |
| 1766.439965 | 126.150385 | 2.84704E-06 | 0.005029123 |
| 1766.479965 | 113.420946 | 2.55975E-06 | 0.004521752 |
| 1766.519965 | 119.684207 | 2.70111E-06 | 0.004771557 |
| 1766.559965 | 124.697371 | 2.81425E-06 | 0.004971534 |
| 1766.599965 | 114.327016 | 2.5802E-06  | 0.004558184 |
| 1766.639965 | 101.629846 | 2.29364E-06 | 0.004052043 |
| 1766.679965 | 76.102601  | 1.71753E-06 | 0.003034325 |
| 1766.719965 | 62.505057  | 1.41065E-06 | 0.002492227 |
| 1766.759965 | 89.09374   | 2.01072E-06 | 0.003552462 |
| 1766.799965 | 122.586925 | 2.76662E-06 | 0.004888057 |
| 1766.839965 | 131.253265 | 2.9622E-06  | 0.005233739 |
| 1766.879965 | 118.488418 | 2.67412E-06 | 0.004724846 |
| 1766.919965 | 113.121273 | 2.55299E-06 | 0.004510928 |
| 1766.959965 | 110.01792  | 2.48295E-06 | 0.004387275 |
| 1766.999965 | 106.026878 | 2.39288E-06 | 0.004228217 |
| 1767.039965 | 96.263519  | 2.17253E-06 | 0.003838954 |
| 1767.079965 | 88.236608  | 1.99138E-06 | 0.003518923 |
| 1767.119965 | 85.952381  | 1.93983E-06 | 0.003427904 |
| 1767.159965 | 85.332258  | 1.92583E-06 | 0.00340325  |
| 1767.199965 | 89.662671  | 2.02356E-06 | 0.003576038 |
| 1767.239965 | 92.947282  | 2.09769E-06 | 0.003707123 |
| 1767.279965 | 85.527564  | 1.93024E-06 | 0.003411271 |
| 1767.319965 | 81.529615  | 1.84001E-06 | 0.003251886 |
| 1767.359965 | 95.896223  | 2.16424E-06 | 0.003824999 |



|             |            |             |             |
|-------------|------------|-------------|-------------|
| 1767.399965 | 114.193698 | 2.57719E-06 | 0.00455493  |
| 1767.439965 | 114.714152 | 2.58894E-06 | 0.004575794 |
| 1767.479965 | 99.800147  | 2.25235E-06 | 0.003980984 |
| 1767.519965 | 79.284598  | 1.78934E-06 | 0.003162699 |
| 1767.559965 | 74.485852  | 1.68104E-06 | 0.002971342 |
| 1767.599965 | 82.403188  | 1.85973E-06 | 0.00328725  |
| 1767.639965 | 80.187941  | 1.80973E-06 | 0.003198951 |
| 1767.679965 | 76.447696  | 1.72532E-06 | 0.00304981  |
| 1767.719965 | 86.461103  | 1.95131E-06 | 0.003449364 |
| 1767.759965 | 100.888109 | 2.2769E-06  | 0.00402502  |
| 1767.799965 | 104.194151 | 2.35152E-06 | 0.004157011 |
| 1767.839965 | 104.088455 | 2.34913E-06 | 0.004152888 |
| 1767.879965 | 98.636609  | 2.22609E-06 | 0.003935461 |
| 1767.919965 | 92.874899  | 2.09606E-06 | 0.003705661 |
| 1767.959965 | 92.620012  | 2.0903E-06  | 0.003695575 |
| 1767.999965 | 90.350166  | 2.03908E-06 | 0.003605089 |
| 1768.039965 | 95.716895  | 2.1602E-06  | 0.003819315 |
| 1768.079965 | 104.135876 | 2.3502E-06  | 0.004155344 |
| 1768.119965 | 104.584823 | 2.36033E-06 | 0.004173353 |
| 1768.159965 | 94.453475  | 2.13168E-06 | 0.003769157 |
| 1768.199965 | 72.933211  | 1.646E-06   | 0.002910459 |
| 1768.239965 | 67.545487  | 1.52441E-06 | 0.002695518 |
| 1768.279965 | 82.916145  | 1.8713E-06  | 0.003308986 |
| 1768.319965 | 99.4162    | 2.24369E-06 | 0.003967553 |
| 1768.359965 | 114.569693 | 2.58568E-06 | 0.00457241  |
| 1768.399965 | 112.578453 | 2.54074E-06 | 0.004493043 |
| 1768.439965 | 103.181424 | 2.32866E-06 | 0.004118097 |
| 1768.479965 | 107.384417 | 2.42352E-06 | 0.004285941 |
| 1768.519965 | 118.706415 | 2.67904E-06 | 0.004737933 |
| 1768.559965 | 102.327419 | 2.30939E-06 | 0.00408429  |
| 1768.599965 | 81.149259  | 1.83143E-06 | 0.00323906  |
| 1768.639965 | 97.49415   | 2.20031E-06 | 0.003891551 |
| 1768.679965 | 117.137014 | 2.64362E-06 | 0.004675716 |
| 1768.719965 | 115.087386 | 2.59736E-06 | 0.004594006 |
| 1768.759965 | 104.917229 | 2.36784E-06 | 0.004188133 |
| 1768.799965 | 103.143126 | 2.3278E-06  | 0.004117407 |
| 1768.839965 | 97.417343  | 2.19857E-06 | 0.003888925 |
| 1768.879965 | 88.722472  | 2.00234E-06 | 0.003541904 |
| 1768.919965 | 98.349334  | 2.21961E-06 | 0.003926308 |
| 1768.959965 | 102.732998 | 2.31854E-06 | 0.004101406 |
| 1768.999965 | 88.915145  | 2.00669E-06 | 0.003549836 |
| 1769.039965 | 79.802403  | 1.80103E-06 | 0.003186092 |
| 1769.079965 | 89.834257  | 2.02743E-06 | 0.003586693 |
| 1769.119965 | 103.896537 | 2.3448E-06  | 0.004148233 |
| 1769.159965 | 99.713822  | 2.2504E-06  | 0.003981321 |
| 1769.199965 | 104.828863 | 2.36584E-06 | 0.004185647 |

|             |            |             |             |
|-------------|------------|-------------|-------------|
| 1769.239965 | 108.707462 | 2.45338E-06 | 0.004340611 |
| 1769.279965 | 101.370696 | 2.2878E-06  | 0.004047751 |
| 1769.319965 | 106.219355 | 2.39722E-06 | 0.004241454 |
| 1769.359965 | 102.822871 | 2.32057E-06 | 0.004105922 |
| 1769.399965 | 101.217312 | 2.28433E-06 | 0.0040419   |
| 1769.439965 | 118.086285 | 2.66504E-06 | 0.004715634 |
| 1769.479965 | 121.618777 | 2.74477E-06 | 0.004856809 |
| 1769.519965 | 118.269412 | 2.66918E-06 | 0.00472316  |
| 1769.559965 | 109.055513 | 2.46123E-06 | 0.004355296 |
| 1769.599965 | 91.893179  | 2.0739E-06  | 0.003669975 |
| 1769.639965 | 91.969127  | 2.07562E-06 | 0.003673091 |
| 1769.679965 | 90.503863  | 2.04255E-06 | 0.003614653 |
| 1769.719965 | 76.52348   | 1.72703E-06 | 0.003056357 |
| 1769.759965 | 71.060758  | 1.60374E-06 | 0.002838239 |
| 1769.799965 | 77.842031  | 1.75679E-06 | 0.00310916  |
| 1769.839965 | 93.871485  | 2.11855E-06 | 0.003749492 |
| 1769.879965 | 89.432141  | 2.01836E-06 | 0.003572253 |
| 1769.919965 | 76.526252  | 1.72709E-06 | 0.003056813 |
| 1769.959965 | 70.331913  | 1.58729E-06 | 0.002809446 |
| 1769.999965 | 82.359151  | 1.85873E-06 | 0.003289954 |
| 1770.039965 | 88.439407  | 1.99595E-06 | 0.003532919 |
| 1770.079965 | 77.134363  | 1.74082E-06 | 0.003081382 |
| 1770.119965 | 73.690632  | 1.66309E-06 | 0.002943878 |
| 1770.159965 | 85.784422  | 1.93603E-06 | 0.003427092 |
| 1770.199965 | 89.031333  | 2.00931E-06 | 0.003556886 |
| 1770.239965 | 92.015567  | 2.07666E-06 | 0.003676192 |
| 1770.279965 | 114.073197 | 2.57447E-06 | 0.004557538 |
| 1770.319965 | 132.301712 | 2.98587E-06 | 0.005285937 |
| 1770.359965 | 120.976124 | 2.73026E-06 | 0.004833548 |
| 1770.399965 | 109.601593 | 2.47356E-06 | 0.004379182 |
| 1770.439965 | 110.578091 | 2.49559E-06 | 0.004418298 |
| 1770.479965 | 119.428276 | 2.69533E-06 | 0.004772027 |
| 1770.519965 | 119.762005 | 2.70286E-06 | 0.00478547  |
| 1770.559965 | 102.443477 | 2.31201E-06 | 0.004093546 |
| 1770.599965 | 82.352126  | 1.85857E-06 | 0.003290789 |
| 1770.639965 | 78.041051  | 1.76128E-06 | 0.003118589 |
| 1770.679965 | 88.845581  | 2.00512E-06 | 0.003550428 |
| 1770.719965 | 97.773636  | 2.20661E-06 | 0.003907297 |
| 1770.759965 | 101.459753 | 2.28981E-06 | 0.004054696 |
| 1770.799965 | 97.260816  | 2.19504E-06 | 0.003886979 |
| 1770.839965 | 91.364676  | 2.06197E-06 | 0.003651425 |
| 1770.879965 | 84.040779  | 1.89668E-06 | 0.003358798 |
| 1770.919965 | 69.946278  | 1.57859E-06 | 0.002795557 |
| 1770.959965 | 77.964527  | 1.75955E-06 | 0.003116094 |
| 1770.999965 | 95.630946  | 2.15826E-06 | 0.003822274 |
| 1771.039965 | 103.979936 | 2.34668E-06 | 0.004156068 |

|             |            |             |             |
|-------------|------------|-------------|-------------|
| 1771.079965 | 106.826841 | 2.41093E-06 | 0.004269955 |
| 1771.119965 | 110.539051 | 2.49471E-06 | 0.004418435 |
| 1771.159965 | 98.038317  | 2.21259E-06 | 0.003918848 |
| 1771.199965 | 87.833517  | 1.98228E-06 | 0.003511015 |
| 1771.239965 | 100.474441 | 2.26757E-06 | 0.004016407 |
| 1771.279965 | 110.468585 | 2.49312E-06 | 0.004416017 |
| 1771.319965 | 97.547289  | 2.20151E-06 | 0.003899572 |
| 1771.359965 | 100.172941 | 2.26076E-06 | 0.004004626 |
| 1771.399965 | 104.45466  | 2.3574E-06  | 0.004175892 |
| 1771.439965 | 102.145503 | 2.30528E-06 | 0.004083668 |
| 1771.479965 | 98.381939  | 2.22034E-06 | 0.003933294 |
| 1771.519965 | 91.464063  | 2.06422E-06 | 0.003656801 |
| 1771.559965 | 104.881774 | 2.36704E-06 | 0.004193345 |
| 1771.599965 | 105.5867   | 2.38294E-06 | 0.004221625 |
| 1771.639965 | 87.648555  | 1.97811E-06 | 0.003504491 |
| 1771.679965 | 81.429443  | 1.83775E-06 | 0.003255903 |
| 1771.719965 | 79.287224  | 1.7894E-06  | 0.00317032  |
| 1771.759965 | 105.071727 | 2.37132E-06 | 0.004201414 |
| 1771.799965 | 125.048987 | 2.82218E-06 | 0.005000341 |
| 1771.839965 | 112.90276  | 2.54806E-06 | 0.004514751 |
| 1771.879965 | 107.010794 | 2.41508E-06 | 0.00427924  |
| 1771.919965 | 101.624687 | 2.29353E-06 | 0.004063947 |
| 1771.959965 | 97.981267  | 2.2113E-06  | 0.003918336 |
| 1771.999965 | 113.067274 | 2.55177E-06 | 0.004521738 |
| 1772.039965 | 112.828858 | 2.54639E-06 | 0.004512305 |
| 1772.079965 | 111.600666 | 2.51867E-06 | 0.004463287 |
| 1772.119965 | 91.921747  | 2.07455E-06 | 0.003676344 |
| 1772.159965 | 81.955966  | 1.84963E-06 | 0.003277844 |
| 1772.199965 | 97.749609  | 2.20607E-06 | 0.003909602 |
| 1772.239965 | 102.712258 | 2.31807E-06 | 0.004108181 |
| 1772.279965 | 93.9462    | 2.12023E-06 | 0.00375765  |
| 1772.319965 | 91.887778  | 2.07378E-06 | 0.0036754   |
| 1772.359965 | 101.810405 | 2.29772E-06 | 0.004072385 |
| 1772.399965 | 102.716538 | 2.31817E-06 | 0.004108723 |
| 1772.439965 | 88.440178  | 1.99597E-06 | 0.00353774  |
| 1772.479965 | 88.327292  | 1.99342E-06 | 0.003533304 |
| 1772.519965 | 93.84333   | 2.11791E-06 | 0.003754044 |
| 1772.559965 | 94.354308  | 2.12945E-06 | 0.003774569 |
| 1772.599965 | 91.073432  | 2.0554E-06  | 0.003643403 |
| 1772.639965 | 86.818641  | 1.95938E-06 | 0.003473268 |
| 1772.679965 | 80.977727  | 1.82755E-06 | 0.003239669 |
| 1772.719965 | 68.780621  | 1.55228E-06 | 0.002751763 |
| 1772.759965 | 68.862003  | 1.55412E-06 | 0.002755081 |
| 1772.799965 | 79.787935  | 1.8007E-06  | 0.003192285 |
| 1772.839965 | 89.681973  | 2.024E-06   | 0.003588223 |
| 1772.879965 | 104.151164 | 2.35055E-06 | 0.004167237 |

|             |            |             |             |
|-------------|------------|-------------|-------------|
| 1772.919965 | 113.054293 | 2.55148E-06 | 0.004523566 |
| 1772.959965 | 118.87289  | 2.6828E-06  | 0.004756489 |
| 1772.999965 | 109.065485 | 2.46146E-06 | 0.004364162 |
| 1773.039965 | 95.542758  | 2.15627E-06 | 0.003823148 |
| 1773.079965 | 94.706966  | 2.1374E-06  | 0.003789789 |
| 1773.119965 | 87.34416   | 1.97124E-06 | 0.003495238 |
| 1773.159965 | 94.134397  | 2.12448E-06 | 0.003767047 |
| 1773.199965 | 107.778395 | 2.43241E-06 | 0.004313146 |
| 1773.239965 | 110.833487 | 2.50136E-06 | 0.004435507 |
| 1773.279965 | 110.817802 | 2.501E-06   | 0.004434979 |
| 1773.319965 | 93.125847  | 2.10172E-06 | 0.003727023 |
| 1773.359965 | 90.604154  | 2.04481E-06 | 0.003626183 |
| 1773.399965 | 95.661298  | 2.15894E-06 | 0.003828668 |
| 1773.439965 | 96.001078  | 2.16661E-06 | 0.003842354 |
| 1773.479965 | 91.872982  | 2.07345E-06 | 0.003677214 |
| 1773.519965 | 87.30451   | 1.97034E-06 | 0.003494439 |
| 1773.559965 | 83.412351  | 1.8825E-06  | 0.003338728 |
| 1773.599965 | 93.739663  | 2.11557E-06 | 0.003752181 |
| 1773.639965 | 99.229423  | 2.23947E-06 | 0.003972013 |
| 1773.679965 | 95.249797  | 2.14966E-06 | 0.0038128   |
| 1773.719965 | 90.926955  | 2.05209E-06 | 0.003639841 |
| 1773.759965 | 108.484042 | 2.44833E-06 | 0.004342756 |
| 1773.799965 | 115.353805 | 2.60337E-06 | 0.004617866 |
| 1773.839965 | 116.283818 | 2.62436E-06 | 0.004655201 |
| 1773.879965 | 125.380348 | 2.82966E-06 | 0.005019477 |
| 1773.919965 | 102.971451 | 2.32392E-06 | 0.004122452 |
| 1773.959965 | 74.355988  | 1.67811E-06 | 0.002976902 |
| 1773.999965 | 75.728888  | 1.7091E-06  | 0.003031935 |
| 1774.039965 | 85.98963   | 1.94067E-06 | 0.003442819 |
| 1774.079965 | 93.636978  | 2.11326E-06 | 0.003749085 |
| 1774.119965 | 102.552478 | 2.31447E-06 | 0.004106141 |
| 1774.159965 | 113.559357 | 2.56288E-06 | 0.004546953 |
| 1774.199965 | 107.004739 | 2.41495E-06 | 0.004284601 |
| 1774.239965 | 107.036742 | 2.41567E-06 | 0.004285979 |
| 1774.279965 | 112.007052 | 2.52784E-06 | 0.004485101 |
| 1774.319965 | 117.747769 | 2.6574E-06  | 0.004715083 |
| 1774.359965 | 117.164683 | 2.64424E-06 | 0.00469184  |
| 1774.399965 | 97.206463  | 2.19381E-06 | 0.003892704 |
| 1774.439965 | 75.843537  | 1.71168E-06 | 0.003037279 |
| 1774.479965 | 83.791439  | 1.89106E-06 | 0.003355641 |
| 1774.519965 | 106.182795 | 2.3964E-06  | 0.004252456 |
| 1774.559965 | 98.660719  | 2.22664E-06 | 0.003951297 |
| 1774.599965 | 79.868434  | 1.80252E-06 | 0.003198751 |
| 1774.639965 | 82.564793  | 1.86337E-06 | 0.003306815 |
| 1774.679965 | 94.106647  | 2.12386E-06 | 0.003769165 |
| 1774.719965 | 97.576164  | 2.20216E-06 | 0.003908214 |

|             |            |             |             |
|-------------|------------|-------------|-------------|
| 1774.759965 | 104.586147 | 2.36036E-06 | 0.004189079 |
| 1774.799965 | 101.96005  | 2.3011E-06  | 0.004083986 |
| 1774.839965 | 93.664283  | 2.11387E-06 | 0.003751785 |
| 1774.879965 | 82.085543  | 1.85256E-06 | 0.003288065 |
| 1774.919965 | 78.190638  | 1.76465E-06 | 0.003132119 |
| 1774.959965 | 85.954086  | 1.93986E-06 | 0.003443181 |
| 1774.999965 | 105.155805 | 2.37322E-06 | 0.004212466 |
| 1775.039965 | 106.027142 | 2.39288E-06 | 0.004247466 |
| 1775.079965 | 100.604981 | 2.27051E-06 | 0.004030344 |
| 1775.119965 | 110.456367 | 2.49285E-06 | 0.004425101 |
| 1775.159965 | 113.70834  | 2.56624E-06 | 0.004555484 |
| 1775.199965 | 102.631805 | 2.31626E-06 | 0.004111819 |
| 1775.239965 | 95.70283   | 2.15988E-06 | 0.003834305 |
| 1775.279965 | 94.909166  | 2.14197E-06 | 0.003802592 |
| 1775.319965 | 92.902677  | 2.09668E-06 | 0.003722285 |
| 1775.359965 | 81.513825  | 1.83965E-06 | 0.003266047 |
| 1775.399965 | 85.390654  | 1.92715E-06 | 0.003421459 |
| 1775.439965 | 94.164286  | 2.12516E-06 | 0.003773088 |
| 1775.479965 | 110.375095 | 2.49101E-06 | 0.004422742 |
| 1775.519965 | 117.830883 | 2.65928E-06 | 0.004721603 |
| 1775.559965 | 100.350918 | 2.26478E-06 | 0.004021253 |
| 1775.599965 | 85.500271  | 1.92962E-06 | 0.003426237 |
| 1775.639965 | 93.05998   | 2.10023E-06 | 0.00372926  |
| 1775.679965 | 81.810863  | 1.84636E-06 | 0.00327854  |
| 1775.719965 | 68.958576  | 1.5563E-06  | 0.002763551 |
| 1775.759965 | 66.371416  | 1.49791E-06 | 0.002659929 |
| 1775.799965 | 76.454651  | 1.72547E-06 | 0.003064098 |
| 1775.839965 | 87.368512  | 1.97179E-06 | 0.003501576 |
| 1775.879965 | 87.136452  | 1.96655E-06 | 0.003492354 |
| 1775.919965 | 88.224965  | 1.99111E-06 | 0.00353606  |
| 1775.959965 | 105.671122 | 2.38485E-06 | 0.004235398 |
| 1775.999965 | 105.065599 | 2.37118E-06 | 0.004211223 |
| 1776.039965 | 94.303195  | 2.12829E-06 | 0.003779931 |
| 1776.079965 | 81.776362  | 1.84558E-06 | 0.003277895 |
| 1776.119965 | 67.589327  | 1.5254E-06  | 0.002709288 |
| 1776.159965 | 65.115225  | 1.46956E-06 | 0.002610174 |
| 1776.199965 | 93.661675  | 2.11381E-06 | 0.003754556 |
| 1776.239965 | 118.385113 | 2.67179E-06 | 0.004745735 |
| 1776.279965 | 121.329347 | 2.73823E-06 | 0.004863871 |
| 1776.319965 | 123.516185 | 2.78759E-06 | 0.004951649 |
| 1776.359965 | 132.570944 | 2.99194E-06 | 0.005314765 |
| 1776.399965 | 138.321922 | 3.12173E-06 | 0.005545447 |
| 1776.439965 | 124.448534 | 2.80863E-06 | 0.004989363 |
| 1776.479965 | 117.605117 | 2.65418E-06 | 0.004715104 |
| 1776.519965 | 110.59454  | 2.49596E-06 | 0.004434131 |
| 1776.559965 | 97.960834  | 2.21084E-06 | 0.003927689 |

|             |            |             |             |
|-------------|------------|-------------|-------------|
| 1776.599965 | 95.876057  | 2.16379E-06 | 0.003844188 |
| 1776.639965 | 91.624812  | 2.06784E-06 | 0.003673815 |
| 1776.679965 | 89.376681  | 2.01711E-06 | 0.003583754 |
| 1776.719965 | 83.951145  | 1.89466E-06 | 0.003366281 |
| 1776.759965 | 82.700897  | 1.86644E-06 | 0.003316223 |
| 1776.799965 | 81.380888  | 1.83665E-06 | 0.003263365 |
| 1776.839965 | 85.367191  | 1.92662E-06 | 0.003423293 |
| 1776.879965 | 85.117486  | 1.92098E-06 | 0.003413356 |
| 1776.919965 | 74.003676  | 1.67016E-06 | 0.00296774  |
| 1776.959965 | 77.726688  | 1.75418E-06 | 0.003117113 |
| 1776.999965 | 91.699078  | 2.06952E-06 | 0.003677538 |
| 1777.039965 | 111.898033 | 2.52538E-06 | 0.004487706 |
| 1777.079965 | 108.939454 | 2.45861E-06 | 0.00436915  |
| 1777.119965 | 107.112609 | 2.41738E-06 | 0.004295979 |
| 1777.159965 | 102.430747 | 2.31172E-06 | 0.004108295 |
| 1777.199965 | 90.282841  | 2.03756E-06 | 0.003621148 |
| 1777.239965 | 88.772302  | 2.00347E-06 | 0.003560642 |
| 1777.279965 | 91.262522  | 2.05967E-06 | 0.003660607 |
| 1777.319965 | 94.316971  | 2.1286E-06  | 0.003783208 |
| 1777.359965 | 95.514622  | 2.15563E-06 | 0.003831334 |
| 1777.399965 | 112.935606 | 2.5488E-06  | 0.004530236 |
| 1777.439965 | 107.963726 | 2.43659E-06 | 0.004330894 |
| 1777.479965 | 95.314326  | 2.15111E-06 | 0.003823558 |
| 1777.519965 | 92.675532  | 2.09156E-06 | 0.003717786 |
| 1777.559965 | 80.622893  | 1.81955E-06 | 0.003234353 |
| 1777.599965 | 81.20433   | 1.83267E-06 | 0.003257752 |
| 1777.639965 | 95.28079   | 2.15035E-06 | 0.003822556 |
| 1777.679965 | 113.168384 | 2.55405E-06 | 0.004540288 |
| 1777.719965 | 126.527831 | 2.85556E-06 | 0.005076381 |
| 1777.759965 | 129.410643 | 2.92062E-06 | 0.005192158 |
| 1777.799965 | 117.432503 | 2.65029E-06 | 0.004711682 |
| 1777.839965 | 93.277429  | 2.10514E-06 | 0.003742605 |
| 1777.879965 | 80.099157  | 1.80773E-06 | 0.003213921 |
| 1777.919965 | 90.076068  | 2.03289E-06 | 0.003614318 |
| 1777.959965 | 100.120267 | 2.25957E-06 | 0.004017434 |
| 1777.999965 | 86.700597  | 1.95671E-06 | 0.003479033 |
| 1778.039965 | 72.456753  | 1.63525E-06 | 0.002907536 |
| 1778.079965 | 77.131509  | 1.74075E-06 | 0.003095194 |
| 1778.119965 | 86.606437  | 1.95459E-06 | 0.00347549  |
| 1778.159965 | 95.206266  | 2.14867E-06 | 0.003820684 |
| 1778.199965 | 96.45562   | 2.17687E-06 | 0.003870908 |
| 1778.239965 | 106.799255 | 2.41031E-06 | 0.00428611  |
| 1778.279965 | 116.45892  | 2.62832E-06 | 0.004673881 |
| 1778.319965 | 111.459685 | 2.51549E-06 | 0.004473346 |
| 1778.359965 | 123.195091 | 2.78034E-06 | 0.004944448 |
| 1778.399965 | 114.551535 | 2.58527E-06 | 0.004597642 |

|             |            |             |             |
|-------------|------------|-------------|-------------|
| 1778.439965 | 105.993494 | 2.39213E-06 | 0.004254252 |
| 1778.479965 | 96.694622  | 2.18226E-06 | 0.003881111 |
| 1778.519965 | 99.893914  | 2.25447E-06 | 0.004009614 |
| 1778.559965 | 107.150081 | 2.41823E-06 | 0.004300964 |
| 1778.599965 | 101.297051 | 2.28613E-06 | 0.004066117 |
| 1778.639965 | 101.400742 | 2.28847E-06 | 0.00407037  |
| 1778.679965 | 103.577078 | 2.33759E-06 | 0.004157825 |
| 1778.719965 | 108.406821 | 2.44659E-06 | 0.0043518   |
| 1778.759965 | 108.097268 | 2.4396E-06  | 0.004339471 |
| 1778.799965 | 108.997567 | 2.45992E-06 | 0.004375711 |
| 1778.839965 | 92.543838  | 2.08859E-06 | 0.003715259 |
| 1778.879965 | 83.760373  | 1.89035E-06 | 0.003362715 |
| 1778.919965 | 97.091102  | 2.19121E-06 | 0.003897989 |
| 1778.959965 | 100.470957 | 2.26749E-06 | 0.004033773 |
| 1778.999965 | 87.321568  | 1.97073E-06 | 0.003505922 |
| 1779.039965 | 77.604702  | 1.75143E-06 | 0.003115864 |
| 1779.079965 | 85.313091  | 1.9254E-06  | 0.003425436 |
| 1779.119965 | 92.24956   | 2.08194E-06 | 0.003704028 |
| 1779.159965 | 109.163366 | 2.46367E-06 | 0.004383254 |
| 1779.199965 | 126.41977  | 2.85312E-06 | 0.005076268 |
| 1779.239965 | 120.861629 | 2.72768E-06 | 0.004853195 |
| 1779.279965 | 104.105276 | 2.34951E-06 | 0.004180438 |
| 1779.319965 | 86.570191  | 1.95377E-06 | 0.00347638  |
| 1779.359965 | 84.683896  | 1.9112E-06  | 0.003400708 |
| 1779.399965 | 92.091785  | 2.07838E-06 | 0.003698275 |
| 1779.439965 | 99.884369  | 2.25425E-06 | 0.004011304 |
| 1779.479965 | 99.673502  | 2.24949E-06 | 0.004002926 |
| 1779.519965 | 98.19642   | 2.21616E-06 | 0.003943695 |
| 1779.559965 | 84.334437  | 1.90331E-06 | 0.003387056 |
| 1779.599965 | 63.18529   | 1.426E-06   | 0.002537717 |
| 1779.639965 | 64.341146  | 1.45209E-06 | 0.002584197 |
| 1779.679965 | 83.244366  | 1.87871E-06 | 0.003343501 |
| 1779.719965 | 100.197299 | 2.26131E-06 | 0.004024505 |
| 1779.759965 | 96.436639  | 2.17644E-06 | 0.003873542 |
| 1779.799965 | 85.128185  | 1.92122E-06 | 0.003419395 |
| 1779.839965 | 72.343776  | 1.6327E-06  | 0.002905942 |
| 1779.879965 | 67.707402  | 1.52806E-06 | 0.002719767 |
| 1779.919965 | 81.544519  | 1.84035E-06 | 0.003275669 |
| 1779.959965 | 87.337832  | 1.97109E-06 | 0.003508467 |
| 1779.999965 | 76.523074  | 1.72702E-06 | 0.003074094 |
| 1780.039965 | 80.376255  | 1.81398E-06 | 0.003228957 |
| 1780.079965 | 93.067937  | 2.10041E-06 | 0.003738904 |
| 1780.119965 | 92.299039  | 2.08306E-06 | 0.003708098 |
| 1780.159965 | 84.124127  | 1.89856E-06 | 0.003379748 |
| 1780.199965 | 84.828349  | 1.91446E-06 | 0.003408117 |
| 1780.239965 | 90.63786   | 2.04557E-06 | 0.003641606 |

|             |            |             |             |
|-------------|------------|-------------|-------------|
| 1780.279965 | 112.107299 | 2.53011E-06 | 0.004504296 |
| 1780.319965 | 132.52638  | 2.99094E-06 | 0.005324823 |
| 1780.359965 | 137.660563 | 3.10681E-06 | 0.005531235 |
| 1780.399965 | 135.042045 | 3.04771E-06 | 0.005426144 |
| 1780.439965 | 120.50414  | 2.71961E-06 | 0.004842103 |
| 1780.479965 | 99.048123  | 2.23538E-06 | 0.003980046 |
| 1780.519965 | 81.555366  | 1.84059E-06 | 0.003277209 |
| 1780.559965 | 77.46395   | 1.74825E-06 | 0.00311287  |
| 1780.599965 | 86.9539    | 1.96243E-06 | 0.0034943   |
| 1780.639965 | 98.414905  | 2.22109E-06 | 0.003954957 |
| 1780.679965 | 91.70656   | 2.06969E-06 | 0.003685454 |
| 1780.719965 | 85.232064  | 1.92357E-06 | 0.003425338 |
| 1780.759965 | 88.265567  | 1.99203E-06 | 0.003547329 |
| 1780.799965 | 96.184696  | 2.17075E-06 | 0.00386568  |
| 1780.839965 | 124.799088 | 2.81654E-06 | 0.00501581  |
| 1780.879965 | 149.052519 | 3.36391E-06 | 0.005990716 |
| 1780.919965 | 135.605326 | 3.06042E-06 | 0.005450369 |
| 1780.959965 | 105.276907 | 2.37595E-06 | 0.004231477 |
| 1780.999965 | 85.094778  | 1.92047E-06 | 0.003420358 |
| 1781.039965 | 76.761102  | 1.73239E-06 | 0.003085458 |
| 1781.079965 | 76.906247  | 1.73567E-06 | 0.003091361 |
| 1781.119965 | 82.96822   | 1.87248E-06 | 0.003335106 |
| 1781.159965 | 76.621308  | 1.72924E-06 | 0.003080046 |
| 1781.199965 | 67.55417   | 1.5246E-06  | 0.002715624 |
| 1781.239965 | 87.078961  | 1.96525E-06 | 0.003500583 |
| 1781.279965 | 117.561673 | 2.6532E-06  | 0.004726098 |
| 1781.319965 | 131.387248 | 2.96523E-06 | 0.005282018 |
| 1781.359965 | 127.467037 | 2.87675E-06 | 0.005124533 |
| 1781.399965 | 130.407628 | 2.94312E-06 | 0.005242871 |
| 1781.439965 | 137.659053 | 3.10677E-06 | 0.00553453  |
| 1781.479965 | 124.536645 | 2.81062E-06 | 0.005007061 |
| 1781.519965 | 106.165981 | 2.39602E-06 | 0.004268554 |
| 1781.559965 | 94.230405  | 2.12665E-06 | 0.003788753 |
| 1781.599965 | 85.546445  | 1.93066E-06 | 0.003439671 |
| 1781.639965 | 85.453114  | 1.92856E-06 | 0.003435996 |
| 1781.679965 | 88.697291  | 2.00177E-06 | 0.003566521 |
| 1781.719965 | 98.942569  | 2.233E-06   | 0.003978573 |
| 1781.759965 | 115.824786 | 2.614E-06   | 0.004657528 |
| 1781.799965 | 126.15215  | 2.84708E-06 | 0.005072924 |
| 1781.839965 | 120.735651 | 2.72484E-06 | 0.004855221 |
| 1781.879965 | 103.897215 | 2.34482E-06 | 0.00417818  |
| 1781.919965 | 90.442053  | 2.04115E-06 | 0.003637168 |
| 1781.959965 | 76.921533  | 1.73601E-06 | 0.003093504 |
| 1781.999965 | 71.983326  | 1.62456E-06 | 0.002894972 |
| 1782.039965 | 63.627709  | 1.43599E-06 | 0.002558989 |
| 1782.079965 | 67.205183  | 1.51673E-06 | 0.002702929 |



|             |            |             |             |
|-------------|------------|-------------|-------------|
| 1782.119965 | 79.74441   | 1.79972E-06 | 0.003207317 |
| 1782.159965 | 100.125035 | 2.25968E-06 | 0.004027116 |
| 1782.199965 | 115.436758 | 2.60525E-06 | 0.004643071 |
| 1782.239965 | 108.790586 | 2.45525E-06 | 0.004375848 |
| 1782.279965 | 106.316945 | 2.39943E-06 | 0.004276448 |
| 1782.319965 | 114.047335 | 2.57389E-06 | 0.004587495 |
| 1782.359965 | 116.911875 | 2.63854E-06 | 0.004702825 |
| 1782.399965 | 113.235243 | 2.55556E-06 | 0.004555033 |
| 1782.439965 | 113.981166 | 2.5724E-06  | 0.004585142 |
| 1782.479965 | 107.996267 | 2.43733E-06 | 0.004344484 |
| 1782.519965 | 97.899402  | 2.20945E-06 | 0.003938394 |
| 1782.559965 | 101.335504 | 2.287E-06   | 0.004076717 |
| 1782.599965 | 101.923874 | 2.30028E-06 | 0.004100479 |
| 1782.639965 | 93.213437  | 2.1037E-06  | 0.003750135 |
| 1782.679965 | 92.175999  | 2.08028E-06 | 0.00370848  |
| 1782.719965 | 86.654091  | 1.95566E-06 | 0.003486398 |
| 1782.759965 | 82.392519  | 1.85948E-06 | 0.003315014 |
| 1782.799965 | 98.17372   | 2.21564E-06 | 0.00395005  |
| 1782.839965 | 108.557489 | 2.44999E-06 | 0.004367942 |
| 1782.879965 | 103.149255 | 2.32794E-06 | 0.004150429 |
| 1782.919965 | 97.027059  | 2.18977E-06 | 0.003904177 |
| 1782.959965 | 92.881719  | 2.09621E-06 | 0.00373746  |
| 1782.999965 | 85.76737   | 1.93565E-06 | 0.003451264 |
| 1783.039965 | 92.597306  | 2.08979E-06 | 0.003726183 |
| 1783.079965 | 95.320296  | 2.15125E-06 | 0.003835844 |
| 1783.119965 | 85.570094  | 1.9312E-06  | 0.003443557 |
| 1783.159965 | 97.120891  | 2.19188E-06 | 0.003908478 |
| 1783.199965 | 106.867386 | 2.41185E-06 | 0.004300807 |
| 1783.239965 | 102.169253 | 2.30582E-06 | 0.004111826 |
| 1783.279965 | 98.889687  | 2.2318E-06  | 0.003979929 |
| 1783.319965 | 103.932953 | 2.34562E-06 | 0.004182995 |
| 1783.359965 | 111.859325 | 2.52451E-06 | 0.004502109 |
| 1783.399965 | 107.519408 | 2.42656E-06 | 0.004327533 |
| 1783.439965 | 112.964806 | 2.54946E-06 | 0.004546806 |
| 1783.479965 | 97.337686  | 2.19678E-06 | 0.003917906 |
| 1783.519965 | 84.988536  | 1.91807E-06 | 0.003420921 |
| 1783.559965 | 84.398205  | 1.90475E-06 | 0.003397236 |
| 1783.599965 | 75.647134  | 1.70725E-06 | 0.003045052 |
| 1783.639965 | 75.021223  | 1.69312E-06 | 0.003019925 |
| 1783.679965 | 81.119221  | 1.83075E-06 | 0.003265468 |
| 1783.719965 | 89.292838  | 2.01521E-06 | 0.003594579 |
| 1783.759965 | 84.19458   | 1.90015E-06 | 0.003389419 |
| 1783.799965 | 82.391116  | 1.85945E-06 | 0.003316892 |
| 1783.839965 | 96.267252  | 2.17262E-06 | 0.003875602 |
| 1783.879965 | 105.350808 | 2.37762E-06 | 0.00424139  |
| 1783.919965 | 100.70291  | 2.27272E-06 | 0.004054358 |

|             |            |             |             |
|-------------|------------|-------------|-------------|
| 1783.959965 | 97.556969  | 2.20172E-06 | 0.003927789 |
| 1783.999965 | 89.147238  | 2.01193E-06 | 0.003589281 |
| 1784.039965 | 82.797228  | 1.86862E-06 | 0.003333689 |
| 1784.079965 | 95.628779  | 2.15821E-06 | 0.003850416 |
| 1784.119965 | 103.524865 | 2.33641E-06 | 0.004168439 |
| 1784.159965 | 89.831366  | 2.02737E-06 | 0.00361715  |
| 1784.199965 | 101.150648 | 2.28283E-06 | 0.004073024 |
| 1784.239965 | 108.567719 | 2.45022E-06 | 0.004371784 |
| 1784.279965 | 98.528478  | 2.22365E-06 | 0.003967615 |
| 1784.319965 | 92.843618  | 2.09535E-06 | 0.003738777 |
| 1784.359965 | 104.23505  | 2.35244E-06 | 0.0041976   |
| 1784.399965 | 108.2805   | 2.44374E-06 | 0.00436061  |
| 1784.439965 | 112.753951 | 2.5447E-06  | 0.004540864 |
| 1784.479965 | 110.148902 | 2.48591E-06 | 0.004436052 |
| 1784.519965 | 101.345316 | 2.28722E-06 | 0.004081594 |
| 1784.559965 | 100.770807 | 2.27426E-06 | 0.004058548 |
| 1784.599965 | 115.971164 | 2.61731E-06 | 0.004670847 |
| 1784.639965 | 120.474963 | 2.71895E-06 | 0.004852351 |
| 1784.679965 | 101.22609  | 2.28453E-06 | 0.004077158 |
| 1784.719965 | 87.08335   | 1.96535E-06 | 0.003507599 |
| 1784.759965 | 80.960823  | 1.82717E-06 | 0.003261065 |
| 1784.799965 | 72.147352  | 1.62827E-06 | 0.002906128 |
| 1784.839965 | 70.414063  | 1.58915E-06 | 0.002836374 |
| 1784.879965 | 78.754626  | 1.77738E-06 | 0.003172414 |
| 1784.919965 | 88.370918  | 1.99441E-06 | 0.00355986  |
| 1784.959965 | 79.409134  | 1.79215E-06 | 0.003198922 |
| 1784.999965 | 71.787111  | 1.62014E-06 | 0.002891941 |
| 1785.039965 | 86.460422  | 1.95129E-06 | 0.003483133 |
| 1785.079965 | 101.146844 | 2.28274E-06 | 0.004074879 |
| 1785.119965 | 104.082842 | 2.349E-06   | 0.004193255 |
| 1785.159965 | 100.144944 | 2.26013E-06 | 0.004034697 |
| 1785.199965 | 92.592592  | 2.08969E-06 | 0.003730507 |
| 1785.239965 | 90.332532  | 2.03868E-06 | 0.003639532 |
| 1785.279965 | 95.498771  | 2.15527E-06 | 0.003847768 |
| 1785.319965 | 115.562732 | 2.60809E-06 | 0.004656275 |
| 1785.359965 | 137.354679 | 3.0999E-06  | 0.005534444 |
| 1785.399965 | 130.76254  | 2.95113E-06 | 0.005268945 |
| 1785.439965 | 106.416122 | 2.40166E-06 | 0.004288026 |
| 1785.479965 | 93.549909  | 2.11129E-06 | 0.003769668 |
| 1785.519965 | 84.174828  | 1.89971E-06 | 0.003391968 |
| 1785.559965 | 75.865353  | 1.71218E-06 | 0.003057192 |
| 1785.599965 | 83.594388  | 1.88661E-06 | 0.003368729 |
| 1785.639965 | 94.10065   | 2.12372E-06 | 0.0037922   |
| 1785.679965 | 100.039348 | 2.25775E-06 | 0.004031617 |
| 1785.719965 | 102.255206 | 2.30776E-06 | 0.004121009 |
| 1785.759965 | 99.244434  | 2.23981E-06 | 0.003999761 |

|             |            |             |             |
|-------------|------------|-------------|-------------|
| 1785.799965 | 103.911959 | 2.34515E-06 | 0.004187966 |
| 1785.839965 | 112.539557 | 2.53986E-06 | 0.004535785 |
| 1785.879965 | 114.045903 | 2.57386E-06 | 0.0045966   |
| 1785.919965 | 101.097855 | 2.28164E-06 | 0.004074822 |
| 1785.959965 | 95.124683  | 2.14683E-06 | 0.003834155 |
| 1785.999965 | 101.616748 | 2.29335E-06 | 0.00409592  |
| 1786.039965 | 99.263709  | 2.24024E-06 | 0.004001165 |
| 1786.079965 | 100.420662 | 2.26635E-06 | 0.00404789  |
| 1786.119965 | 111.08057  | 2.50693E-06 | 0.004477684 |
| 1786.159965 | 113.948702 | 2.57166E-06 | 0.004593402 |
| 1786.199965 | 105.212375 | 2.3745E-06  | 0.004241326 |
| 1786.239965 | 99.111523  | 2.23681E-06 | 0.003995478 |
| 1786.279965 | 90.708329  | 2.04716E-06 | 0.003656802 |
| 1786.319965 | 86.262695  | 1.94683E-06 | 0.003477659 |
| 1786.359965 | 91.076029  | 2.05546E-06 | 0.00367179  |
| 1786.399965 | 96.887085  | 2.18661E-06 | 0.003906154 |
| 1786.439965 | 96.821298  | 2.18512E-06 | 0.003903589 |
| 1786.479965 | 93.690276  | 2.11446E-06 | 0.003777439 |
| 1786.519965 | 89.466795  | 2.01914E-06 | 0.003607236 |
| 1786.559965 | 82.1081    | 1.85307E-06 | 0.003310613 |
| 1786.599965 | 67.252841  | 1.5178E-06  | 0.002711707 |
| 1786.639965 | 73.397749  | 1.65648E-06 | 0.002959542 |
| 1786.679965 | 90.509924  | 2.04268E-06 | 0.003649621 |
| 1786.719965 | 102.128618 | 2.3049E-06  | 0.004118212 |
| 1786.759965 | 90.632567  | 2.04545E-06 | 0.00365473  |
| 1786.799965 | 76.332909  | 1.72273E-06 | 0.003078169 |
| 1786.839965 | 83.501817  | 1.88452E-06 | 0.003367335 |
| 1786.879965 | 88.482693  | 1.99693E-06 | 0.003568276 |
| 1786.919965 | 80.910266  | 1.82603E-06 | 0.003262973 |
| 1786.959965 | 82.420025  | 1.86011E-06 | 0.003323933 |
| 1786.999965 | 83.858431  | 1.89257E-06 | 0.003382019 |
| 1787.039965 | 85.366364  | 1.9266E-06  | 0.003442911 |
| 1787.079965 | 91.018504  | 2.05416E-06 | 0.00367095  |
| 1787.119965 | 93.330515  | 2.10634E-06 | 0.003764282 |
| 1787.159965 | 95.543266  | 2.15628E-06 | 0.003853614 |
| 1787.199965 | 97.221292  | 2.19415E-06 | 0.003921383 |
| 1787.239965 | 88.640419  | 2.00049E-06 | 0.003575357 |
| 1787.279965 | 88.183429  | 1.99018E-06 | 0.003557004 |
| 1787.319965 | 108.103812 | 2.43975E-06 | 0.004360618 |
| 1787.359965 | 118.797525 | 2.68109E-06 | 0.004792081 |
| 1787.399965 | 117.780465 | 2.65814E-06 | 0.004751161 |
| 1787.439965 | 113.062438 | 2.55166E-06 | 0.004560942 |
| 1787.479965 | 101.798528 | 2.29745E-06 | 0.004106648 |
| 1787.519965 | 90.598107  | 2.04467E-06 | 0.003654894 |
| 1787.559965 | 91.434746  | 2.06355E-06 | 0.003688728 |
| 1787.599965 | 86.100878  | 1.94318E-06 | 0.003473623 |

|             |            |             |             |
|-------------|------------|-------------|-------------|
| 1787.639965 | 82.141615  | 1.85382E-06 | 0.003313966 |
| 1787.679965 | 83.291056  | 1.87976E-06 | 0.003360415 |
| 1787.719965 | 79.16666   | 1.78668E-06 | 0.003194086 |
| 1787.759965 | 84.594713  | 1.90918E-06 | 0.003413164 |
| 1787.799965 | 98.71775   | 2.22792E-06 | 0.003983079 |
| 1787.839965 | 111.40771  | 2.51432E-06 | 0.004495196 |
| 1787.879965 | 113.770599 | 2.56764E-06 | 0.004590639 |
| 1787.919965 | 116.143027 | 2.62119E-06 | 0.004686471 |
| 1787.959965 | 102.724255 | 2.31834E-06 | 0.004145105 |
| 1787.999965 | 89.270815  | 2.01472E-06 | 0.003602316 |
| 1788.039965 | 79.655394  | 1.79771E-06 | 0.00321438  |
| 1788.079965 | 87.682829  | 1.97888E-06 | 0.003538394 |
| 1788.119965 | 95.33639   | 2.15161E-06 | 0.003847336 |
| 1788.159965 | 93.418997  | 2.10834E-06 | 0.003770043 |
| 1788.199965 | 91.721323  | 2.07002E-06 | 0.003701614 |
| 1788.239965 | 82.855425  | 1.86993E-06 | 0.003343886 |
| 1788.279964 | 86.013175  | 1.9412E-06  | 0.003471405 |
| 1788.319964 | 100.322934 | 2.26415E-06 | 0.004049023 |
| 1788.359964 | 101.051603 | 2.28059E-06 | 0.004078523 |
| 1788.399964 | 97.230174  | 2.19435E-06 | 0.003924375 |
| 1788.439964 | 91.437669  | 2.06362E-06 | 0.003690662 |
| 1788.479964 | 85.599286  | 1.93186E-06 | 0.003455087 |
| 1788.519964 | 82.665269  | 1.86564E-06 | 0.003336734 |
| 1788.559964 | 69.438937  | 1.56714E-06 | 0.002802924 |
| 1788.599964 | 64.666815  | 1.45944E-06 | 0.002610354 |
| 1788.639964 | 69.370305  | 1.56559E-06 | 0.002800279 |
| 1788.679964 | 70.828379  | 1.5985E-06  | 0.002859201 |
| 1788.719964 | 89.701732  | 2.02444E-06 | 0.003621162 |
| 1788.759964 | 87.861163  | 1.9829E-06  | 0.003546939 |
| 1788.799964 | 82.88446   | 1.87059E-06 | 0.003346106 |
| 1788.839964 | 93.847529  | 2.11801E-06 | 0.003788777 |
| 1788.879964 | 89.498935  | 2.01987E-06 | 0.003613298 |
| 1788.919964 | 83.304065  | 1.88006E-06 | 0.003363271 |
| 1788.959964 | 84.570029  | 1.90863E-06 | 0.003414459 |
| 1788.999964 | 86.108151  | 1.94334E-06 | 0.003476637 |
| 1789.039964 | 82.294764  | 1.85728E-06 | 0.003322745 |
| 1789.079964 | 74.78567   | 1.68781E-06 | 0.003019624 |
| 1789.119964 | 85.17454   | 1.92227E-06 | 0.003439173 |
| 1789.159964 | 89.991242  | 2.03098E-06 | 0.003633743 |
| 1789.199964 | 80.286966  | 1.81196E-06 | 0.003241968 |
| 1789.239964 | 82.925749  | 1.87152E-06 | 0.003348596 |
| 1789.279964 | 104.889858 | 2.36722E-06 | 0.004235616 |
| 1789.319964 | 112.829357 | 2.5464E-06  | 0.004556327 |
| 1789.359964 | 97.40422   | 2.19828E-06 | 0.00393351  |
| 1789.399964 | 103.483692 | 2.33548E-06 | 0.004179113 |
| 1789.439964 | 125.462395 | 2.83151E-06 | 0.00506682  |

|             |            |             |             |
|-------------|------------|-------------|-------------|
| 1789.479964 | 136.124908 | 3.07215E-06 | 0.00549755  |
| 1789.519964 | 122.460735 | 2.76377E-06 | 0.004945818 |
| 1789.559964 | 104.16384  | 2.35083E-06 | 0.004206956 |
| 1789.599964 | 89.00545   | 2.00873E-06 | 0.003594821 |
| 1789.639964 | 103.661095 | 2.33949E-06 | 0.004186839 |
| 1789.679964 | 106.197762 | 2.39674E-06 | 0.00428939  |
| 1789.719964 | 96.007518  | 2.16676E-06 | 0.003877886 |
| 1789.759964 | 100.221829 | 2.26187E-06 | 0.004048199 |
| 1789.799964 | 102.255018 | 2.30775E-06 | 0.004130417 |
| 1789.839964 | 91.989895  | 2.07608E-06 | 0.003715858 |
| 1789.879964 | 82.560834  | 1.86328E-06 | 0.003335053 |
| 1789.919964 | 76.337442  | 1.72283E-06 | 0.003083727 |
| 1789.959964 | 73.674391  | 1.66273E-06 | 0.002976217 |
| 1789.999964 | 75.122383  | 1.69541E-06 | 0.003034779 |
| 1790.039964 | 95.646685  | 2.15861E-06 | 0.003864003 |
| 1790.079964 | 111.331477 | 2.5126E-06  | 0.004497748 |
| 1790.119964 | 108.137697 | 2.44052E-06 | 0.004368819 |
| 1790.159964 | 106.089224 | 2.39429E-06 | 0.004286155 |
| 1790.199964 | 103.089392 | 2.32658E-06 | 0.004165051 |
| 1790.239964 | 106.198543 | 2.39675E-06 | 0.004290763 |
| 1790.279964 | 98.888995  | 2.23179E-06 | 0.003995523 |
| 1790.319964 | 82.77759   | 1.86817E-06 | 0.003344631 |
| 1790.359964 | 76.624732  | 1.72931E-06 | 0.003096094 |
| 1790.399964 | 76.146014  | 1.71851E-06 | 0.003076819 |
| 1790.439964 | 79.369896  | 1.79127E-06 | 0.003207158 |
| 1790.479964 | 84.59286   | 1.90914E-06 | 0.003418282 |
| 1790.519964 | 85.754121  | 1.93535E-06 | 0.003465285 |
| 1790.559964 | 87.139589  | 1.96662E-06 | 0.00352135  |
| 1790.599964 | 90.53766   | 2.04331E-06 | 0.003658749 |
| 1790.639964 | 102.604487 | 2.31564E-06 | 0.004146478 |
| 1790.679964 | 101.318404 | 2.28662E-06 | 0.004094596 |
| 1790.719964 | 90.272531  | 2.03733E-06 | 0.003648279 |
| 1790.759964 | 85.893938  | 1.93851E-06 | 0.0034714   |
| 1790.799964 | 78.361154  | 1.7685E-06  | 0.003167033 |
| 1790.839964 | 84.812531  | 1.9141E-06  | 0.003427848 |
| 1790.879964 | 102.484731 | 2.31294E-06 | 0.004142194 |
| 1790.919964 | 113.040363 | 2.55116E-06 | 0.00456893  |
| 1790.959964 | 100.478697 | 2.26766E-06 | 0.004061296 |
| 1790.999964 | 76.35766   | 1.72329E-06 | 0.003086405 |
| 1791.039964 | 73.202185  | 1.65207E-06 | 0.002958926 |
| 1791.079964 | 82.7131    | 1.86672E-06 | 0.003343444 |
| 1791.119964 | 91.328036  | 2.06115E-06 | 0.003691761 |
| 1791.159964 | 108.35387  | 2.4454E-06  | 0.004380095 |
| 1791.199964 | 102.716405 | 2.31817E-06 | 0.004152299 |
| 1791.239964 | 95.935973  | 2.16514E-06 | 0.003878288 |
| 1791.279964 | 100.759352 | 2.274E-06   | 0.004073367 |

|             |            |             |             |
|-------------|------------|-------------|-------------|
| 1791.319964 | 100.036168 | 2.25768E-06 | 0.004044222 |
| 1791.359964 | 97.981485  | 2.21131E-06 | 0.003961244 |
| 1791.399964 | 88.716058  | 2.0022E-06  | 0.003586737 |
| 1791.439964 | 85.088614  | 1.92033E-06 | 0.003440159 |
| 1791.479964 | 89.946208  | 2.02996E-06 | 0.003636634 |
| 1791.519964 | 101.447875 | 2.28954E-06 | 0.004101752 |
| 1791.559964 | 110.643904 | 2.49708E-06 | 0.004473666 |
| 1791.599964 | 108.413134 | 2.44673E-06 | 0.004383568 |
| 1791.639964 | 107.343459 | 2.42259E-06 | 0.004340413 |
| 1791.679964 | 89.771364  | 2.02601E-06 | 0.00362997  |
| 1791.719964 | 79.635466  | 1.79726E-06 | 0.003220189 |
| 1791.759964 | 81.293075  | 1.83467E-06 | 0.003287291 |
| 1791.799964 | 81.658653  | 1.84292E-06 | 0.003302148 |
| 1791.839964 | 81.243498  | 1.83355E-06 | 0.003285433 |
| 1791.879964 | 80.747968  | 1.82237E-06 | 0.003265467 |
| 1791.919964 | 89.620822  | 2.02262E-06 | 0.003624368 |
| 1791.959964 | 88.038797  | 1.98691E-06 | 0.003560469 |
| 1791.999964 | 96.189335  | 2.17086E-06 | 0.00389018  |
| 1792.039964 | 95.776508  | 2.16154E-06 | 0.00387357  |
| 1792.079964 | 88.397981  | 1.99502E-06 | 0.003575234 |
| 1792.119964 | 96.852913  | 2.18584E-06 | 0.003917279 |
| 1792.159964 | 103.00016  | 2.32457E-06 | 0.004166002 |
| 1792.199964 | 97.952421  | 2.21065E-06 | 0.003961926 |
| 1792.239964 | 102.180548 | 2.30607E-06 | 0.004133036 |
| 1792.279964 | 99.801747  | 2.25239E-06 | 0.004036907 |
| 1792.319964 | 102.968649 | 2.32386E-06 | 0.004165099 |
| 1792.359964 | 108.784455 | 2.45511E-06 | 0.004400447 |
| 1792.399964 | 120.947612 | 2.72962E-06 | 0.004892569 |
| 1792.439964 | 130.686396 | 2.94941E-06 | 0.00528664  |
| 1792.479964 | 134.83662  | 3.04307E-06 | 0.00545465  |
| 1792.519964 | 131.315584 | 2.96361E-06 | 0.00531233  |
| 1792.559964 | 121.078187 | 2.73257E-06 | 0.004898288 |
| 1792.599964 | 103.301911 | 2.33138E-06 | 0.004179232 |
| 1792.639964 | 88.496775  | 1.99725E-06 | 0.003580348 |
| 1792.679964 | 80.60159   | 1.81907E-06 | 0.003261002 |
| 1792.719964 | 82.2494    | 1.85625E-06 | 0.003327744 |
| 1792.759964 | 81.646597  | 1.84265E-06 | 0.003303429 |
| 1792.799964 | 76.456944  | 1.72553E-06 | 0.003093524 |
| 1792.839964 | 82.630851  | 1.86486E-06 | 0.003343401 |
| 1792.879964 | 100.240386 | 2.26229E-06 | 0.004056007 |
| 1792.919964 | 122.232876 | 2.75863E-06 | 0.004945995 |
| 1792.959964 | 125.658414 | 2.83594E-06 | 0.005084719 |
| 1792.999964 | 128.045803 | 2.88982E-06 | 0.005181439 |
| 1793.039964 | 115.618334 | 2.60934E-06 | 0.004678659 |
| 1793.079964 | 95.935216  | 2.16512E-06 | 0.003882241 |
| 1793.119964 | 81.002939  | 1.82812E-06 | 0.003278045 |

|             |            |             |             |
|-------------|------------|-------------|-------------|
| 1793.159964 | 88.122822  | 1.98881E-06 | 0.003566253 |
| 1793.199964 | 93.723595  | 2.11521E-06 | 0.003792996 |
| 1793.239964 | 90.495148  | 2.04235E-06 | 0.003662423 |
| 1793.279964 | 97.111073  | 2.19166E-06 | 0.003930263 |
| 1793.319964 | 137.997136 | 3.1144E-06  | 0.005585121 |
| 1793.359964 | 144.54394  | 3.26216E-06 | 0.005850219 |
| 1793.399964 | 132.64304  | 2.99357E-06 | 0.005368666 |
| 1793.439964 | 128.20679  | 2.89345E-06 | 0.005189226 |
| 1793.479964 | 115.174096 | 2.59932E-06 | 0.004661826 |
| 1793.519964 | 113.459273 | 2.56062E-06 | 0.004592519 |
| 1793.559964 | 109.04299  | 2.46095E-06 | 0.004413859 |
| 1793.599964 | 103.858731 | 2.34395E-06 | 0.004204103 |
| 1793.639964 | 108.53572  | 2.4495E-06  | 0.004393521 |
| 1793.679964 | 109.48325  | 2.47088E-06 | 0.004431976 |
| 1793.719964 | 106.417254 | 2.40169E-06 | 0.004307958 |
| 1793.759964 | 98.261012  | 2.21761E-06 | 0.003977868 |
| 1793.799964 | 98.254156  | 2.21746E-06 | 0.003977679 |
| 1793.839964 | 98.462249  | 2.22216E-06 | 0.003986192 |
| 1793.879964 | 95.01246   | 2.1443E-06  | 0.003846615 |
| 1793.919964 | 98.427515  | 2.22137E-06 | 0.003984963 |
| 1793.959964 | 106.577796 | 2.40531E-06 | 0.004315034 |
| 1793.999964 | 103.000338 | 2.32457E-06 | 0.004170286 |
| 1794.039964 | 90.306478  | 2.03809E-06 | 0.003656417 |
| 1794.079964 | 84.526752  | 1.90765E-06 | 0.003422479 |
| 1794.119964 | 84.869497  | 1.91539E-06 | 0.003436433 |
| 1794.159964 | 93.530376  | 2.11085E-06 | 0.003787203 |
| 1794.199964 | 100.941876 | 2.27812E-06 | 0.004087398 |
| 1794.239964 | 106.373684 | 2.40071E-06 | 0.004307442 |
| 1794.279964 | 104.017262 | 2.34752E-06 | 0.004212117 |
| 1794.319964 | 103.855901 | 2.34388E-06 | 0.004205676 |
| 1794.359964 | 106.741044 | 2.409E-06   | 0.004322607 |
| 1794.399964 | 105.104657 | 2.37207E-06 | 0.004256435 |
| 1794.439964 | 102.54281  | 2.31425E-06 | 0.00415278  |
| 1794.479964 | 95.031106  | 2.14472E-06 | 0.003848657 |
| 1794.519964 | 84.818333  | 1.91423E-06 | 0.003435127 |
| 1794.559964 | 78.347249  | 1.76819E-06 | 0.00317312  |
| 1794.599964 | 77.167524  | 1.74156E-06 | 0.00312541  |
| 1794.639964 | 73.170118  | 1.65135E-06 | 0.002963574 |
| 1794.679964 | 76.03843   | 1.71608E-06 | 0.003079817 |
| 1794.719964 | 68.512323  | 1.54623E-06 | 0.002775046 |
| 1794.759964 | 68.774387  | 1.55214E-06 | 0.002785723 |
| 1794.799964 | 96.728601  | 2.18303E-06 | 0.003918102 |
| 1794.839964 | 104.628313 | 2.36132E-06 | 0.004238183 |
| 1794.879964 | 90.921452  | 2.05197E-06 | 0.003683041 |
| 1794.919964 | 75.18374   | 1.69679E-06 | 0.003045606 |
| 1794.959964 | 69.474908  | 1.56795E-06 | 0.002814411 |

|             |            |             |             |
|-------------|------------|-------------|-------------|
| 1794.999964 | 76.980374  | 1.73734E-06 | 0.003118525 |
| 1795.039964 | 92.398536  | 2.08531E-06 | 0.003743208 |
| 1795.079964 | 92.125737  | 2.07915E-06 | 0.00373224  |
| 1795.119964 | 74.826753  | 1.68874E-06 | 0.003031483 |
| 1795.159964 | 60.587708  | 1.36738E-06 | 0.002454666 |
| 1795.199964 | 67.575679  | 1.52509E-06 | 0.00273784  |
| 1795.239964 | 104.291164 | 2.35371E-06 | 0.004225468 |
| 1795.279964 | 132.935723 | 3.00017E-06 | 0.005386152 |
| 1795.319964 | 119.514396 | 2.69727E-06 | 0.004842469 |
| 1795.359964 | 104.213438 | 2.35195E-06 | 0.004222601 |
| 1795.399964 | 103.138442 | 2.32769E-06 | 0.004179136 |
| 1795.439964 | 96.328751  | 2.17401E-06 | 0.003903297 |
| 1795.479964 | 100.787031 | 2.27462E-06 | 0.00408404  |
| 1795.519964 | 92.316966  | 2.08347E-06 | 0.003740904 |
| 1795.559964 | 89.963058  | 2.03034E-06 | 0.003645599 |
| 1795.599964 | 93.248791  | 2.1045E-06  | 0.003778832 |
| 1795.639964 | 89.838691  | 2.02753E-06 | 0.003640721 |
| 1795.679964 | 80.927196  | 1.82641E-06 | 0.003279655 |
| 1795.719964 | 86.583403  | 1.95407E-06 | 0.003508957 |
| 1795.759964 | 93.300709  | 2.10567E-06 | 0.003781273 |
| 1795.799964 | 98.97671   | 2.23377E-06 | 0.004011398 |
| 1795.839964 | 101.160764 | 2.28306E-06 | 0.004100006 |
| 1795.879964 | 99.085945  | 2.23623E-06 | 0.004016004 |
| 1795.919964 | 85.905891  | 1.93878E-06 | 0.003481887 |
| 1795.959964 | 74.185983  | 1.67427E-06 | 0.00300693  |
| 1795.999964 | 77.546863  | 1.75012E-06 | 0.003143224 |
| 1796.039964 | 96.672581  | 2.18177E-06 | 0.003918538 |
| 1796.079964 | 111.268215 | 2.51117E-06 | 0.00451026  |
| 1796.119964 | 103.118662 | 2.32724E-06 | 0.00418001  |
| 1796.159964 | 91.558929  | 2.06636E-06 | 0.003711509 |
| 1796.199964 | 95.355297  | 2.15204E-06 | 0.003865487 |
| 1796.239964 | 96.993691  | 2.18901E-06 | 0.003931992 |
| 1796.279964 | 93.534099  | 2.11093E-06 | 0.003791829 |
| 1796.319964 | 98.531447  | 2.22372E-06 | 0.003994508 |
| 1796.359964 | 114.856221 | 2.59214E-06 | 0.004656425 |
| 1796.399964 | 103.681629 | 2.33995E-06 | 0.004203486 |
| 1796.439964 | 85.345334  | 1.92613E-06 | 0.003460168 |
| 1796.479964 | 86.221603  | 1.9459E-06  | 0.003495773 |
| 1796.519964 | 90.800689  | 2.04925E-06 | 0.00368151  |
| 1796.559964 | 97.775184  | 2.20665E-06 | 0.003964379 |
| 1796.599964 | 106.585216 | 2.40548E-06 | 0.004321685 |
| 1796.639964 | 100.935971 | 2.27798E-06 | 0.004092718 |
| 1796.679964 | 82.342831  | 1.85836E-06 | 0.003338884 |
| 1796.719964 | 79.04937   | 1.78403E-06 | 0.00320541  |
| 1796.759964 | 82.841504  | 1.86962E-06 | 0.003359254 |
| 1796.799964 | 85.79353   | 1.93624E-06 | 0.003479037 |



|             |            |             |             |
|-------------|------------|-------------|-------------|
| 1796.839964 | 81.439337  | 1.83797E-06 | 0.003302542 |
| 1796.879964 | 79.069781  | 1.78449E-06 | 0.003206523 |
| 1796.919964 | 95.889187  | 2.16409E-06 | 0.003888688 |
| 1796.959964 | 114.118477 | 2.5755E-06  | 0.004628062 |
| 1796.999964 | 102.127336 | 2.30487E-06 | 0.004141854 |
| 1797.039964 | 95.187352  | 2.14825E-06 | 0.003860484 |
| 1797.079964 | 108.316716 | 2.44456E-06 | 0.004393065 |
| 1797.119964 | 110.840325 | 2.50151E-06 | 0.004495517 |
| 1797.159964 | 118.966459 | 2.68491E-06 | 0.004825208 |
| 1797.199964 | 118.656937 | 2.67792E-06 | 0.004812761 |
| 1797.239964 | 102.041261 | 2.30293E-06 | 0.004138916 |
| 1797.279964 | 85.175087  | 1.92228E-06 | 0.003454881 |
| 1797.319964 | 87.001321  | 1.9635E-06  | 0.003529035 |
| 1797.359964 | 91.866303  | 2.07329E-06 | 0.003726457 |
| 1797.399964 | 92.854456  | 2.0956E-06  | 0.003766624 |
| 1797.439964 | 102.180165 | 2.30606E-06 | 0.004145012 |
| 1797.479964 | 104.014992 | 2.34747E-06 | 0.004219537 |
| 1797.519964 | 93.907338  | 2.11936E-06 | 0.003809588 |
| 1797.559964 | 78.010614  | 1.76059E-06 | 0.003164768 |
| 1797.599964 | 82.905394  | 1.87106E-06 | 0.003363416 |
| 1797.639964 | 78.688635  | 1.77589E-06 | 0.003192416 |
| 1797.679964 | 60.778778  | 1.37169E-06 | 0.002465864 |
| 1797.719964 | 54.600608  | 1.23226E-06 | 0.002215258 |
| 1797.759964 | 66.008989  | 1.48973E-06 | 0.002678179 |
| 1797.799964 | 75.20105   | 1.69718E-06 | 0.003051195 |
| 1797.839964 | 84.124202  | 1.89857E-06 | 0.003413318 |
| 1797.879964 | 84.741658  | 1.9125E-06  | 0.003438448 |
| 1797.919964 | 82.563316  | 1.86334E-06 | 0.003350134 |
| 1797.959964 | 84.876584  | 1.91555E-06 | 0.003444076 |
| 1797.999964 | 95.200244  | 2.14854E-06 | 0.003863069 |
| 1798.039964 | 87.437456  | 1.97334E-06 | 0.003548147 |
| 1798.079964 | 79.32941   | 1.79035E-06 | 0.0032192   |
| 1798.119964 | 102.289558 | 2.30853E-06 | 0.004151019 |
| 1798.159964 | 114.209502 | 2.57755E-06 | 0.004634846 |
| 1798.199964 | 100.37837  | 2.2654E-06  | 0.004073642 |
| 1798.239964 | 79.254922  | 1.78867E-06 | 0.003216464 |
| 1798.279964 | 69.319612  | 1.56445E-06 | 0.002813314 |
| 1798.319964 | 77.246255  | 1.74334E-06 | 0.003135084 |
| 1798.359964 | 97.847112  | 2.20827E-06 | 0.00397127  |
| 1798.399964 | 115.564741 | 2.60814E-06 | 0.00469047  |
| 1798.439964 | 104.383848 | 2.3558E-06  | 0.004236761 |
| 1798.479964 | 91.35932   | 2.06185E-06 | 0.003708201 |
| 1798.519964 | 88.638938  | 2.00046E-06 | 0.003597863 |
| 1798.559964 | 85.525758  | 1.9302E-06  | 0.003471575 |
| 1798.599964 | 96.629452  | 2.18079E-06 | 0.003922373 |
| 1798.639964 | 105.708864 | 2.3857E-06  | 0.004291019 |

|             |            |             |             |
|-------------|------------|-------------|-------------|
| 1798.679964 | 105.414486 | 2.37906E-06 | 0.004279164 |
| 1798.719964 | 109.796549 | 2.47796E-06 | 0.004457147 |
| 1798.759964 | 91.994615  | 2.07619E-06 | 0.003734568 |
| 1798.799964 | 78.300484  | 1.76713E-06 | 0.003178719 |
| 1798.839964 | 82.028497  | 1.85127E-06 | 0.003330137 |
| 1798.879964 | 97.409038  | 2.19839E-06 | 0.003954633 |
| 1798.919964 | 84.244073  | 1.90127E-06 | 0.003420235 |
| 1798.959964 | 71.093549  | 1.60448E-06 | 0.0028864   |
| 1798.999964 | 81.790245  | 1.84589E-06 | 0.003320759 |
| 1799.039964 | 89.570586  | 2.02148E-06 | 0.003636729 |
| 1799.079964 | 91.478379  | 2.06454E-06 | 0.003714272 |
| 1799.119964 | 87.957914  | 1.98509E-06 | 0.003571411 |
| 1799.159964 | 101.309673 | 2.28642E-06 | 0.004113632 |
| 1799.199964 | 124.281814 | 2.80487E-06 | 0.005046517 |
| 1799.239964 | 116.758051 | 2.63507E-06 | 0.004741117 |
| 1799.279964 | 82.264076  | 1.85659E-06 | 0.003340517 |
| 1799.319964 | 85.023979  | 1.91887E-06 | 0.003452666 |
| 1799.359964 | 114.721564 | 2.58911E-06 | 0.004658734 |
| 1799.399964 | 109.163699 | 2.46367E-06 | 0.004433132 |
| 1799.439964 | 98.189558  | 2.216E-06   | 0.003987562 |
| 1799.479964 | 96.130935  | 2.16954E-06 | 0.003904046 |
| 1799.519964 | 88.69035   | 2.00162E-06 | 0.003601951 |
| 1799.559964 | 80.27327   | 1.81166E-06 | 0.003260183 |
| 1799.599964 | 89.34975   | 2.0165E-06  | 0.003628892 |
| 1799.639964 | 89.651891  | 2.02332E-06 | 0.003641244 |
| 1799.679964 | 86.873884  | 1.96062E-06 | 0.003528493 |
| 1799.719964 | 79.793245  | 1.80082E-06 | 0.003240976 |
| 1799.759964 | 89.479002  | 2.01942E-06 | 0.003634465 |
| 1799.799964 | 95.275401  | 2.15023E-06 | 0.003869989 |
| 1799.839964 | 85.506073  | 1.92975E-06 | 0.003473247 |
| 1799.879964 | 89.73941   | 2.02529E-06 | 0.003645285 |
| 1799.919964 | 96.731437  | 2.18309E-06 | 0.003929394 |
| 1799.959964 | 106.609589 | 2.40603E-06 | 0.004330758 |
| 1799.999964 | 91.19925   | 2.05824E-06 | 0.003704832 |
| 1800.039964 | 74.700593  | 1.68589E-06 | 0.003034666 |
| 1800.079964 | 74.809957  | 1.68836E-06 | 0.003039177 |
| 1800.119964 | 91.476958  | 2.06451E-06 | 0.003716361 |
| 1800.159964 | 92.545397  | 2.08862E-06 | 0.003759851 |
| 1800.199964 | 91.885148  | 2.07372E-06 | 0.00373311  |
| 1800.239964 | 89.19353   | 2.01297E-06 | 0.003623836 |
| 1800.279964 | 80.080579  | 1.80731E-06 | 0.003253659 |
| 1800.319964 | 82.902897  | 1.871E-06   | 0.003368404 |
| 1800.359964 | 91.99866   | 2.07628E-06 | 0.003738054 |
| 1800.399964 | 101.789157 | 2.29724E-06 | 0.00413595  |
| 1800.439964 | 107.021611 | 2.41533E-06 | 0.004348654 |
| 1800.479964 | 100.231247 | 2.26208E-06 | 0.004072829 |

|             |            |             |             |
|-------------|------------|-------------|-------------|
| 1800.519964 | 90.375234  | 2.03964E-06 | 0.003672418 |
| 1800.559964 | 100.035317 | 2.25766E-06 | 0.004065048 |
| 1800.599964 | 105.450961 | 2.37988E-06 | 0.004285214 |
| 1800.639964 | 102.125135 | 2.30482E-06 | 0.004150155 |
| 1800.679964 | 80.658211  | 1.82034E-06 | 0.003277856 |
| 1800.719964 | 71.242868  | 1.60785E-06 | 0.002895292 |
| 1800.759964 | 94.989036  | 2.14377E-06 | 0.003860416 |
| 1800.799964 | 109.970893 | 2.48189E-06 | 0.004469387 |
| 1800.839964 | 98.360133  | 2.21985E-06 | 0.003997597 |
| 1800.879964 | 103.484609 | 2.3355E-06  | 0.004205961 |
| 1800.919964 | 117.682261 | 2.65592E-06 | 0.004783108 |
| 1800.959964 | 109.893381 | 2.48014E-06 | 0.004466634 |
| 1800.999964 | 105.787202 | 2.38747E-06 | 0.004299833 |
| 1801.039964 | 107.655343 | 2.42963E-06 | 0.004375863 |
| 1801.079964 | 116.035192 | 2.61875E-06 | 0.004716583 |
| 1801.119964 | 129.910502 | 2.9319E-06  | 0.005280702 |
| 1801.159964 | 152.020906 | 3.4309E-06  | 0.0061796   |
| 1801.199964 | 171.897772 | 3.87949E-06 | 0.006987743 |
| 1801.239964 | 197.559832 | 4.45865E-06 | 0.008031099 |
| 1801.279964 | 229.509997 | 5.17972E-06 | 0.009330128 |
| 1801.319964 | 248.261776 | 5.60292E-06 | 0.010092656 |
| 1801.359964 | 278.816327 | 6.2925E-06  | 0.011335051 |
| 1801.399964 | 288.37775  | 6.50828E-06 | 0.011724023 |
| 1801.439964 | 284.972175 | 6.43143E-06 | 0.011585826 |
| 1801.479964 | 267.253746 | 6.03154E-06 | 0.010865707 |
| 1801.519964 | 240.818955 | 5.43495E-06 | 0.009791168 |
| 1801.559964 | 200.262476 | 4.51965E-06 | 0.008142412 |
| 1801.599964 | 153.923616 | 3.47384E-06 | 0.006258473 |
| 1801.639964 | 146.893477 | 3.31518E-06 | 0.005972763 |
| 1801.679964 | 137.792957 | 3.1098E-06  | 0.005602856 |
| 1801.719964 | 112.031534 | 2.5284E-06  | 0.004555461 |
| 1801.759964 | 98.982763  | 2.2339E-06  | 0.004024957 |
| 1801.799964 | 105.59415  | 2.38311E-06 | 0.004293893 |
| 1801.839964 | 112.139559 | 2.53083E-06 | 0.004560157 |
| 1801.879964 | 117.249981 | 2.64617E-06 | 0.004768078 |
| 1801.919964 | 111.727848 | 2.52154E-06 | 0.004543617 |
| 1801.959964 | 113.457425 | 2.56058E-06 | 0.004614056 |
| 1801.999964 | 118.188033 | 2.66734E-06 | 0.004806545 |
| 1802.039964 | 103.447067 | 2.33466E-06 | 0.004207144 |
| 1802.079964 | 106.680111 | 2.40762E-06 | 0.004338726 |
| 1802.119964 | 114.678256 | 2.58813E-06 | 0.004664118 |
| 1802.159964 | 118.432974 | 2.67287E-06 | 0.004816934 |
| 1802.199964 | 129.260417 | 2.91723E-06 | 0.005257427 |
| 1802.239964 | 154.033928 | 3.47633E-06 | 0.006265183 |
| 1802.279964 | 190.433224 | 4.29781E-06 | 0.007745862 |
| 1802.319964 | 213.183632 | 4.81126E-06 | 0.008671426 |

|             |            |             |             |
|-------------|------------|-------------|-------------|
| 1802.359964 | 226.011787 | 5.10077E-06 | 0.009193426 |
| 1802.399964 | 222.980161 | 5.03235E-06 | 0.00907031  |
| 1802.439964 | 214.11192  | 4.83221E-06 | 0.008709764 |
| 1802.479964 | 207.231999 | 4.67694E-06 | 0.008430086 |
| 1802.519964 | 198.998413 | 4.49112E-06 | 0.008095328 |
| 1802.559964 | 188.562576 | 4.25559E-06 | 0.007670965 |
| 1802.599964 | 166.180616 | 3.75047E-06 | 0.006760588 |
| 1802.639964 | 140.325602 | 3.16695E-06 | 0.005708877 |
| 1802.679964 | 121.118363 | 2.73347E-06 | 0.004927577 |
| 1802.719964 | 112.466598 | 2.53821E-06 | 0.00457569  |
| 1802.759964 | 101.374437 | 2.28788E-06 | 0.004124498 |
| 1802.799964 | 103.230694 | 2.32977E-06 | 0.004200115 |
| 1802.839964 | 104.466053 | 2.35765E-06 | 0.004250472 |
| 1802.879964 | 110.652361 | 2.49727E-06 | 0.004502277 |
| 1802.919964 | 118.912788 | 2.6837E-06  | 0.004838489 |
| 1802.959964 | 122.502434 | 2.76471E-06 | 0.00498466  |
| 1802.999964 | 122.348282 | 2.76123E-06 | 0.004978498 |
| 1803.039964 | 105.872088 | 2.38939E-06 | 0.004308158 |
| 1803.079964 | 100.54254  | 2.26911E-06 | 0.004091378 |
| 1803.119964 | 98.381181  | 2.22033E-06 | 0.004003515 |
| 1803.159964 | 110.386182 | 2.49126E-06 | 0.004492145 |
| 1803.199964 | 120.632701 | 2.72251E-06 | 0.004909234 |
| 1803.239964 | 140.393208 | 3.16848E-06 | 0.005713528 |
| 1803.279964 | 144.798327 | 3.2679E-06  | 0.005892932 |
| 1803.319964 | 127.966785 | 2.88803E-06 | 0.005208046 |
| 1803.359964 | 131.497002 | 2.9677E-06  | 0.005351839 |
| 1803.399964 | 158.174632 | 3.56978E-06 | 0.006437743 |
| 1803.439964 | 167.031065 | 3.76966E-06 | 0.006798353 |
| 1803.479964 | 162.877421 | 3.67592E-06 | 0.006629442 |
| 1803.519964 | 160.829222 | 3.62969E-06 | 0.006546221 |
| 1803.559964 | 139.962232 | 3.15875E-06 | 0.005697    |
| 1803.599964 | 109.4963   | 2.47118E-06 | 0.004457018 |
| 1803.639964 | 95.758302  | 2.16113E-06 | 0.003897903 |
| 1803.679964 | 105.965794 | 2.3915E-06  | 0.004313501 |
| 1803.719964 | 116.125238 | 2.62078E-06 | 0.004727162 |
| 1803.759964 | 124.971538 | 2.82043E-06 | 0.005087385 |
| 1803.799964 | 123.442822 | 2.78593E-06 | 0.005025265 |
| 1803.839964 | 94.321201  | 2.1287E-06  | 0.003839831 |
| 1803.879964 | 91.717744  | 2.06994E-06 | 0.003733926 |
| 1803.919964 | 106.546458 | 2.40461E-06 | 0.004337715 |
| 1803.959964 | 103.613603 | 2.33841E-06 | 0.004218406 |
| 1803.999964 | 84.143826  | 1.89901E-06 | 0.003425812 |
| 1804.039964 | 85.328525  | 1.92575E-06 | 0.003474123 |
| 1804.079964 | 111.233942 | 2.5104E-06  | 0.004528954 |
| 1804.119964 | 111.761303 | 2.5223E-06  | 0.004550526 |
| 1804.159964 | 93.802946  | 2.117E-06   | 0.00381941  |

|             |            |             |             |
|-------------|------------|-------------|-------------|
| 1804.199964 | 106.904718 | 2.41269E-06 | 0.004352976 |
| 1804.239964 | 120.76375  | 2.72547E-06 | 0.004917401 |
| 1804.279964 | 121.978888 | 2.75289E-06 | 0.004966991 |
| 1804.319964 | 119.705891 | 2.7016E-06  | 0.004874542 |
| 1804.359964 | 127.720699 | 2.88248E-06 | 0.005201028 |
| 1804.399964 | 123.809875 | 2.79422E-06 | 0.005041884 |
| 1804.439964 | 107.7591   | 2.43197E-06 | 0.004388349 |
| 1804.479964 | 87.256198  | 1.96925E-06 | 0.003553474 |
| 1804.519964 | 78.430494  | 1.77007E-06 | 0.003194121 |
| 1804.559964 | 72.764394  | 1.64219E-06 | 0.002963432 |
| 1804.599964 | 73.499494  | 1.65878E-06 | 0.002993436 |
| 1804.639964 | 82.853409  | 1.86989E-06 | 0.003374471 |
| 1804.679964 | 85.78401   | 1.93603E-06 | 0.003493907 |
| 1804.719964 | 75.083917  | 1.69454E-06 | 0.003058169 |
| 1804.759964 | 71.265976  | 1.60837E-06 | 0.002902729 |
| 1804.799964 | 77.191233  | 1.7421E-06  | 0.00314414  |
| 1804.839964 | 74.422004  | 1.6796E-06  | 0.003031411 |
| 1804.879964 | 72.138644  | 1.62807E-06 | 0.002938469 |
| 1804.919964 | 68.935442  | 1.55578E-06 | 0.002808053 |
| 1804.959964 | 71.256618  | 1.60816E-06 | 0.002902669 |
| 1804.999964 | 84.178134  | 1.89978E-06 | 0.003429109 |
| 1805.039964 | 95.152606  | 2.14746E-06 | 0.003876254 |
| 1805.079964 | 95.339174  | 2.15167E-06 | 0.003883941 |
| 1805.119964 | 96.120657  | 2.16931E-06 | 0.003915864 |
| 1805.159964 | 83.541927  | 1.88542E-06 | 0.003403494 |
| 1805.199964 | 81.052807  | 1.82925E-06 | 0.00330216  |
| 1805.239964 | 104.092279 | 2.34922E-06 | 0.004240902 |
| 1805.279964 | 114.605513 | 2.58649E-06 | 0.004669333 |
| 1805.319964 | 115.130587 | 2.59834E-06 | 0.00469083  |
| 1805.359964 | 107.968796 | 2.43671E-06 | 0.00439913  |
| 1805.399964 | 99.38995   | 2.24309E-06 | 0.00404968  |
| 1805.439964 | 101.266985 | 2.28545E-06 | 0.004126251 |
| 1805.479964 | 113.832637 | 2.56904E-06 | 0.004638358 |
| 1805.519964 | 110.51199  | 2.4941E-06  | 0.00450315  |
| 1805.559964 | 103.077011 | 2.3263E-06  | 0.004200282 |
| 1805.599964 | 102.405319 | 2.31115E-06 | 0.004173004 |
| 1805.639964 | 89.191853  | 2.01294E-06 | 0.003634637 |
| 1805.679964 | 81.454315  | 1.83831E-06 | 0.0033194   |
| 1805.719964 | 74.292288  | 1.67667E-06 | 0.003027603 |
| 1805.759964 | 72.377751  | 1.63347E-06 | 0.002949646 |
| 1805.799964 | 83.326436  | 1.88056E-06 | 0.003395918 |
| 1805.839964 | 87.364202  | 1.97169E-06 | 0.003560554 |
| 1805.879964 | 86.773357  | 1.95835E-06 | 0.003536552 |
| 1805.919964 | 87.155083  | 1.96697E-06 | 0.003552188 |
| 1805.959964 | 93.007526  | 2.09905E-06 | 0.003790801 |
| 1805.999964 | 99.963382  | 2.25603E-06 | 0.004074398 |

|             |            |             |             |
|-------------|------------|-------------|-------------|
| 1806.039964 | 101.14823  | 2.28277E-06 | 0.004122782 |
| 1806.079964 | 95.359154  | 2.15212E-06 | 0.003886907 |
| 1806.119964 | 101.651845 | 2.29414E-06 | 0.004143493 |
| 1806.159964 | 97.51936   | 2.20088E-06 | 0.003975134 |
| 1806.199964 | 85.513661  | 1.92992E-06 | 0.003485829 |
| 1806.239964 | 90.160375  | 2.03479E-06 | 0.003675326 |
| 1806.279964 | 91.343854  | 2.0615E-06  | 0.003723653 |
| 1806.319964 | 96.506327  | 2.17801E-06 | 0.003934189 |
| 1806.359964 | 117.818826 | 2.65901E-06 | 0.004803123 |
| 1806.399964 | 118.543042 | 2.67535E-06 | 0.004832755 |
| 1806.439964 | 100.12975  | 2.25979E-06 | 0.004082173 |
| 1806.479964 | 90.8236    | 2.04976E-06 | 0.003702854 |
| 1806.519964 | 87.116358  | 1.96609E-06 | 0.00355179  |
| 1806.559964 | 78.978652  | 1.78244E-06 | 0.003220081 |
| 1806.599964 | 71.572297  | 1.61529E-06 | 0.002918178 |
| 1806.639964 | 81.151364  | 1.83147E-06 | 0.003308813 |
| 1806.679964 | 100.683518 | 2.27229E-06 | 0.004105295 |
| 1806.719964 | 100.485016 | 2.26781E-06 | 0.004097292 |
| 1806.759964 | 95.637674  | 2.15841E-06 | 0.003899727 |
| 1806.799964 | 96.576396  | 2.17959E-06 | 0.003938092 |
| 1806.839964 | 100.947921 | 2.27825E-06 | 0.00411644  |
| 1806.879964 | 95.579619  | 2.1571E-06  | 0.003897619 |
| 1806.919964 | 103.451024 | 2.33475E-06 | 0.004218698 |
| 1806.959964 | 109.70642  | 2.47592E-06 | 0.00447389  |
| 1806.999964 | 97.520497  | 2.2009E-06  | 0.003977029 |
| 1807.039964 | 96.81634   | 2.18501E-06 | 0.0039484   |
| 1807.079964 | 104.902112 | 2.36749E-06 | 0.004278252 |
| 1807.119964 | 85.793955  | 1.93625E-06 | 0.003499036 |
| 1807.159964 | 81.486404  | 1.83903E-06 | 0.00332343  |
| 1807.199964 | 99.759323  | 2.25143E-06 | 0.004068782 |
| 1807.239964 | 112.272856 | 2.53384E-06 | 0.00457926  |
| 1807.279964 | 111.4886   | 2.51614E-06 | 0.004547374 |
| 1807.319964 | 95.413634  | 2.15335E-06 | 0.003891798 |
| 1807.359964 | 86.04438   | 1.9419E-06  | 0.003509716 |
| 1807.399964 | 84.996794  | 1.91826E-06 | 0.003467062 |
| 1807.439964 | 95.745432  | 2.16084E-06 | 0.00390559  |
| 1807.479964 | 93.427824  | 2.10854E-06 | 0.003811136 |
| 1807.519964 | 87.052137  | 1.96465E-06 | 0.003551136 |
| 1807.559964 | 79.872633  | 1.80261E-06 | 0.003258333 |
| 1807.599964 | 75.839986  | 1.7116E-06  | 0.003093893 |
| 1807.639964 | 77.735133  | 1.75437E-06 | 0.003171276 |
| 1807.679964 | 80.258012  | 1.81131E-06 | 0.003274272 |
| 1807.719964 | 79.31136   | 1.78995E-06 | 0.003235723 |
| 1807.759964 | 81.998049  | 1.85058E-06 | 0.003345408 |
| 1807.799964 | 79.12303   | 1.7857E-06  | 0.003228182 |
| 1807.839964 | 84.681351  | 1.91114E-06 | 0.003455036 |

|             |            |             |             |
|-------------|------------|-------------|-------------|
| 1807.879964 | 90.845316  | 2.05025E-06 | 0.00370661  |
| 1807.919964 | 81.411958  | 1.83735E-06 | 0.00332179  |
| 1807.959964 | 84.120436  | 1.89848E-06 | 0.003432378 |
| 1807.999964 | 99.019158  | 2.23472E-06 | 0.004040382 |
| 1808.039964 | 111.117091 | 2.50776E-06 | 0.004534127 |
| 1808.079964 | 112.86137  | 2.54712E-06 | 0.004605404 |
| 1808.119964 | 101.147304 | 2.28275E-06 | 0.004127493 |
| 1808.159964 | 86.755445  | 1.95795E-06 | 0.003540286 |
| 1808.199964 | 89.065494  | 2.01008E-06 | 0.003634634 |
| 1808.239964 | 99.755389  | 2.25134E-06 | 0.004070963 |
| 1808.279964 | 108.916288 | 2.45809E-06 | 0.004444913 |
| 1808.319964 | 123.57514  | 2.78892E-06 | 0.005043258 |
| 1808.359964 | 109.672441 | 2.47515E-06 | 0.00447597  |
| 1808.399964 | 94.240546  | 2.12688E-06 | 0.003846246 |
| 1808.439964 | 83.161355  | 1.87684E-06 | 0.003394145 |
| 1808.479964 | 75.516954  | 1.70431E-06 | 0.003082215 |
| 1808.519964 | 95.347486  | 2.15186E-06 | 0.003891682 |
| 1808.559964 | 102.435715 | 2.31183E-06 | 0.004181086 |
| 1808.599964 | 84.499951  | 1.90705E-06 | 0.003449084 |
| 1808.639964 | 71.363552  | 1.61058E-06 | 0.002912952 |
| 1808.679964 | 78.650646  | 1.77504E-06 | 0.003210471 |
| 1808.719964 | 83.930017  | 1.89418E-06 | 0.003426048 |
| 1808.759964 | 74.457942  | 1.68041E-06 | 0.003039462 |
| 1808.799964 | 75.025127  | 1.69321E-06 | 0.003062683 |
| 1808.839964 | 73.32097   | 1.65475E-06 | 0.002993182 |
| 1808.879964 | 64.329389  | 1.45182E-06 | 0.002626177 |
| 1808.919964 | 62.918056  | 1.41997E-06 | 0.002568617 |
| 1808.959964 | 67.346325  | 1.51991E-06 | 0.002749461 |
| 1808.999964 | 72.902799  | 1.64531E-06 | 0.002976374 |
| 1809.039964 | 79.298287  | 1.78965E-06 | 0.003237552 |
| 1809.079964 | 93.983132  | 2.12107E-06 | 0.003837182 |
| 1809.119964 | 103.931281 | 2.34558E-06 | 0.004243443 |
| 1809.159964 | 98.21281   | 2.21653E-06 | 0.004010051 |
| 1809.199964 | 97.905409  | 2.20959E-06 | 0.003997588 |
| 1809.239964 | 90.262913  | 2.03711E-06 | 0.003685618 |
| 1809.279964 | 79.834433  | 1.80175E-06 | 0.003259874 |
| 1809.319964 | 80.872341  | 1.82518E-06 | 0.003302328 |
| 1809.359964 | 90.996013  | 2.05365E-06 | 0.003715798 |
| 1809.399964 | 96.508745  | 2.17807E-06 | 0.003940996 |
| 1809.439964 | 96.507738  | 2.17805E-06 | 0.003941042 |
| 1809.479964 | 86.575815  | 1.9539E-06  | 0.003535535 |
| 1809.519964 | 89.596738  | 2.02207E-06 | 0.003658983 |
| 1809.559964 | 84.161065  | 1.8994E-06  | 0.003437075 |
| 1809.599964 | 84.35195   | 1.90371E-06 | 0.003444946 |
| 1809.639964 | 87.259406  | 1.96932E-06 | 0.003563766 |
| 1809.679964 | 80.424251  | 1.81506E-06 | 0.003284684 |

|             |            |             |             |
|-------------|------------|-------------|-------------|
| 1809.719964 | 92.016095  | 2.07668E-06 | 0.0037582   |
| 1809.759964 | 87.817687  | 1.98192E-06 | 0.003586805 |
| 1809.799964 | 91.646466  | 2.06833E-06 | 0.003743269 |
| 1809.839964 | 103.154505 | 2.32805E-06 | 0.004213404 |
| 1809.879964 | 93.202107  | 2.10344E-06 | 0.003806977 |
| 1809.919964 | 85.647459  | 1.93294E-06 | 0.003498474 |
| 1809.959964 | 101.91083  | 2.29999E-06 | 0.004162882 |
| 1809.999964 | 105.510471 | 2.38122E-06 | 0.004310016 |
| 1810.039964 | 89.432311  | 2.01836E-06 | 0.003653317 |
| 1810.079964 | 87.658656  | 1.97833E-06 | 0.003580942 |
| 1810.119964 | 92.680687  | 2.09167E-06 | 0.003786181 |
| 1810.159964 | 91.991963  | 2.07613E-06 | 0.003758128 |
| 1810.199964 | 97.564609  | 2.2019E-06  | 0.003985874 |
| 1810.239964 | 104.122245 | 2.34989E-06 | 0.004253872 |
| 1810.279964 | 89.413556  | 2.01794E-06 | 0.003653035 |
| 1810.319964 | 92.103991  | 2.07866E-06 | 0.003763037 |
| 1810.359964 | 94.621011  | 2.13546E-06 | 0.003865959 |
| 1810.399964 | 106.689812 | 2.40784E-06 | 0.004359154 |
| 1810.439964 | 116.795852 | 2.63592E-06 | 0.004772174 |
| 1810.479964 | 105.05982  | 2.37105E-06 | 0.004292745 |
| 1810.519964 | 88.705987  | 2.00197E-06 | 0.003624608 |
| 1810.559964 | 78.766221  | 1.77764E-06 | 0.003218531 |
| 1810.599964 | 72.457938  | 1.63527E-06 | 0.002960828 |
| 1810.639964 | 72.308671  | 1.63191E-06 | 0.002954794 |
| 1810.679964 | 71.097142  | 1.60456E-06 | 0.002905351 |
| 1810.719964 | 60.351772  | 1.36206E-06 | 0.002466301 |
| 1810.759964 | 67.826145  | 1.53074E-06 | 0.002771806 |
| 1810.799964 | 71.718343  | 1.61858E-06 | 0.00293093  |
| 1810.839964 | 64.815814  | 1.4628E-06  | 0.002648901 |
| 1810.879964 | 64.220406  | 1.44937E-06 | 0.002624626 |
| 1810.919964 | 82.342919  | 1.85836E-06 | 0.00336535  |
| 1810.959964 | 86.843475  | 1.95994E-06 | 0.003549366 |
| 1810.999964 | 88.082602  | 1.9879E-06  | 0.00360009  |
| 1811.039964 | 102.546189 | 2.31432E-06 | 0.004191334 |
| 1811.079964 | 109.466789 | 2.47051E-06 | 0.004474297 |
| 1811.119964 | 102.218336 | 2.30693E-06 | 0.004178119 |
| 1811.159964 | 94.712021  | 2.13752E-06 | 0.003871388 |
| 1811.199964 | 87.273254  | 1.96964E-06 | 0.003567404 |
| 1811.239964 | 80.302873  | 1.81232E-06 | 0.003282554 |
| 1811.279964 | 80.12459   | 1.8083E-06  | 0.003275338 |
| 1811.319964 | 91.704542  | 2.06964E-06 | 0.003748787 |
| 1811.359964 | 97.091404  | 2.19122E-06 | 0.003969084 |
| 1811.399964 | 94.669015  | 2.13655E-06 | 0.003870143 |
| 1811.439964 | 91.638441  | 2.06815E-06 | 0.003746333 |
| 1811.479964 | 85.751063  | 1.93528E-06 | 0.003505725 |
| 1811.519964 | 87.856671  | 1.9828E-06  | 0.003591887 |



|             |            |             |             |
|-------------|------------|-------------|-------------|
| 1811.559964 | 92.716916  | 2.09249E-06 | 0.003790674 |
| 1811.599964 | 93.838346  | 2.1178E-06  | 0.003836608 |
| 1811.639964 | 75.732913  | 1.70919E-06 | 0.00309643  |
| 1811.679964 | 72.124279  | 1.62774E-06 | 0.002948952 |
| 1811.719964 | 90.214817  | 2.03602E-06 | 0.003688703 |
| 1811.759964 | 91.21737   | 2.05865E-06 | 0.003729778 |
| 1811.799964 | 77.4329    | 1.74755E-06 | 0.003166216 |
| 1811.839964 | 72.346108  | 1.63275E-06 | 0.002958283 |
| 1811.879964 | 78.411288  | 1.76963E-06 | 0.003206364 |
| 1811.919964 | 76.612973  | 1.72905E-06 | 0.003132897 |
| 1811.959964 | 91.973483  | 2.07571E-06 | 0.00376111  |
| 1811.999964 | 107.878776 | 2.43467E-06 | 0.004411629 |
| 1812.039964 | 105.03994  | 2.37061E-06 | 0.004295631 |
| 1812.079964 | 94.805091  | 2.13962E-06 | 0.00387716  |
| 1812.119964 | 88.023446  | 1.98657E-06 | 0.003599897 |
| 1812.159964 | 82.849469  | 1.8698E-06  | 0.003388371 |
| 1812.199964 | 80.221507  | 1.81049E-06 | 0.003280966 |
| 1812.239964 | 70.118106  | 1.58247E-06 | 0.002867812 |
| 1812.279964 | 81.288544  | 1.83457E-06 | 0.003324753 |
| 1812.319964 | 112.26723  | 2.53372E-06 | 0.004591902 |
| 1812.359964 | 112.064467 | 2.52914E-06 | 0.00458371  |
| 1812.399964 | 107.218609 | 2.41977E-06 | 0.0043856   |
| 1812.439964 | 114.517217 | 2.58449E-06 | 0.00468424  |
| 1812.479964 | 105.171107 | 2.37357E-06 | 0.00430204  |
| 1812.519964 | 99.521499  | 2.24606E-06 | 0.004071032 |
| 1812.559964 | 98.771176  | 2.22913E-06 | 0.004040428 |
| 1812.599964 | 96.685453  | 2.18206E-06 | 0.003955195 |
| 1812.639964 | 88.877229  | 2.00584E-06 | 0.003635857 |
| 1812.679964 | 79.106821  | 1.78533E-06 | 0.003236233 |
| 1812.719964 | 68.754424  | 1.55169E-06 | 0.002812782 |
| 1812.759964 | 83.814594  | 1.89158E-06 | 0.003428978 |
| 1812.799964 | 87.177747  | 1.96748E-06 | 0.003566648 |
| 1812.839964 | 80.052528  | 1.80667E-06 | 0.003275211 |
| 1812.879964 | 87.954198  | 1.985E-06   | 0.003598574 |
| 1812.919964 | 89.29339   | 2.01523E-06 | 0.003653446 |
| 1812.959964 | 78.738893  | 1.77703E-06 | 0.003221679 |
| 1812.999964 | 66.873595  | 1.50924E-06 | 0.002736259 |
| 1813.039964 | 72.793706  | 1.64285E-06 | 0.002978557 |
| 1813.079964 | 75.287999  | 1.69915E-06 | 0.003080686 |
| 1813.119964 | 75.987473  | 1.71493E-06 | 0.003109376 |
| 1813.159964 | 78.410388  | 1.76961E-06 | 0.003208592 |
| 1813.199964 | 86.155567  | 1.94441E-06 | 0.003525606 |
| 1813.239964 | 79.010262  | 1.78315E-06 | 0.003233282 |
| 1813.279964 | 72.111075  | 1.62745E-06 | 0.002951016 |
| 1813.319964 | 84.234841  | 1.90106E-06 | 0.003447236 |
| 1813.359964 | 97.573315  | 2.20209E-06 | 0.003993189 |

|             |            |             |             |
|-------------|------------|-------------|-------------|
| 1813.399964 | 112.487906 | 2.5387E-06  | 0.00460367  |
| 1813.439964 | 115.98895  | 2.61771E-06 | 0.004747058 |
| 1813.479964 | 101.116965 | 2.28207E-06 | 0.004138487 |
| 1813.519964 | 91.709112  | 2.06975E-06 | 0.003753527 |
| 1813.559964 | 94.588312  | 2.13473E-06 | 0.003871454 |
| 1813.599964 | 92.913862  | 2.09694E-06 | 0.003803004 |
| 1813.639964 | 79.673948  | 1.79813E-06 | 0.00326116  |
| 1813.679964 | 85.020211  | 1.91879E-06 | 0.003480067 |
| 1813.719964 | 94.169423  | 2.12527E-06 | 0.00385465  |
| 1813.759964 | 84.978157  | 1.91784E-06 | 0.003478499 |
| 1813.799964 | 77.586797  | 1.75103E-06 | 0.003176011 |
| 1813.839964 | 70.70531   | 1.59572E-06 | 0.002894381 |
| 1813.879964 | 75.190598  | 1.69695E-06 | 0.003078058 |
| 1813.919964 | 86.746072  | 1.95774E-06 | 0.00355118  |
| 1813.959964 | 88.641108  | 2.00051E-06 | 0.003628838 |
| 1813.999964 | 93.363217  | 2.10708E-06 | 0.003822239 |
| 1814.039964 | 95.522844  | 2.15582E-06 | 0.003910739 |
| 1814.079964 | 104.539069 | 2.3593E-06  | 0.004279961 |
| 1814.119964 | 104.879018 | 2.36697E-06 | 0.004293974 |
| 1814.159964 | 106.134216 | 2.3953E-06  | 0.00434546  |
| 1814.199964 | 108.189433 | 2.44168E-06 | 0.004429704 |
| 1814.239964 | 96.756383  | 2.18366E-06 | 0.003961677 |
| 1814.279964 | 105.194099 | 2.37408E-06 | 0.004307254 |
| 1814.319964 | 117.793444 | 2.65843E-06 | 0.00482325  |
| 1814.359964 | 111.193733 | 2.50949E-06 | 0.004553114 |
| 1814.399964 | 94.492938  | 2.13257E-06 | 0.003869342 |
| 1814.439964 | 88.536053  | 1.99814E-06 | 0.003625497 |
| 1814.479964 | 90.003994  | 2.03126E-06 | 0.003685689 |
| 1814.519964 | 80.274756  | 1.81169E-06 | 0.003287347 |
| 1814.559964 | 65.020022  | 1.46741E-06 | 0.002662706 |
| 1814.599964 | 63.974141  | 1.44381E-06 | 0.002619933 |
| 1814.639964 | 83.776712  | 1.89072E-06 | 0.003430983 |
| 1814.679964 | 98.519029  | 2.22344E-06 | 0.004034827 |
| 1814.719964 | 113.294868 | 2.55691E-06 | 0.004640071 |
| 1814.759964 | 100.870401 | 2.2765E-06  | 0.004131309 |
| 1814.799964 | 78.353146  | 1.76832E-06 | 0.00320915  |
| 1814.839964 | 74.812696  | 1.68842E-06 | 0.003064209 |
| 1814.879964 | 86.456529  | 1.9512E-06  | 0.0035412   |
| 1814.919964 | 108.694437 | 2.45308E-06 | 0.004452148 |
| 1814.959964 | 109.998014 | 2.4825E-06  | 0.004505642 |
| 1814.999964 | 92.103025  | 2.07864E-06 | 0.003772726 |
| 1815.039964 | 89.543704  | 2.02088E-06 | 0.003667972 |
| 1815.079964 | 106.565532 | 2.40504E-06 | 0.004365332 |
| 1815.119964 | 121.466066 | 2.74132E-06 | 0.004975825 |
| 1815.159964 | 115.627547 | 2.60955E-06 | 0.004736756 |
| 1815.199964 | 105.287783 | 2.3762E-06  | 0.004313276 |

|             |            |             |             |
|-------------|------------|-------------|-------------|
| 1815.239964 | 111.151159 | 2.50853E-06 | 0.004553578 |
| 1815.279964 | 115.534734 | 2.60746E-06 | 0.004733266 |
| 1815.319964 | 110.39749  | 2.49152E-06 | 0.004522902 |
| 1815.359964 | 106.570386 | 2.40515E-06 | 0.004366204 |
| 1815.399964 | 113.112725 | 2.5528E-06  | 0.004634347 |
| 1815.439964 | 116.841153 | 2.63694E-06 | 0.00478721  |
| 1815.479964 | 107.601332 | 2.42841E-06 | 0.004408734 |
| 1815.519964 | 102.014388 | 2.30232E-06 | 0.004179913 |
| 1815.559964 | 84.803356  | 1.91389E-06 | 0.003474789 |
| 1815.599964 | 76.02455   | 1.71577E-06 | 0.003115149 |
| 1815.639964 | 89.584289  | 2.02179E-06 | 0.003670847 |
| 1815.679964 | 97.746911  | 2.20601E-06 | 0.004005411 |
| 1815.719964 | 92.869456  | 2.09593E-06 | 0.00380563  |
| 1815.759964 | 92.900516  | 2.09664E-06 | 0.003806986 |
| 1815.799964 | 92.375837  | 2.08479E-06 | 0.003785569 |
| 1815.839964 | 103.778048 | 2.34213E-06 | 0.004252926 |
| 1815.879964 | 113.917283 | 2.57095E-06 | 0.004668545 |
| 1815.919964 | 99.174232  | 2.23822E-06 | 0.004064436 |
| 1815.959964 | 84.883375  | 1.9157E-06  | 0.003478834 |
| 1815.999964 | 81.278545  | 1.83434E-06 | 0.003331168 |
| 1816.039964 | 87.438992  | 1.97338E-06 | 0.00358373  |
| 1816.079964 | 86.145387  | 1.94418E-06 | 0.003530789 |
| 1816.119964 | 88.584362  | 1.99923E-06 | 0.003630834 |
| 1816.159964 | 99.746029  | 2.25113E-06 | 0.00408841  |
| 1816.199964 | 110.3143   | 2.48964E-06 | 0.004521684 |
| 1816.239964 | 107.527747 | 2.42675E-06 | 0.004407563 |
| 1816.279964 | 99.9759    | 2.25632E-06 | 0.004098103 |
| 1816.319964 | 109.672075 | 2.47515E-06 | 0.004495657 |
| 1816.359964 | 112.774278 | 2.54516E-06 | 0.004622924 |
| 1816.399964 | 104.359729 | 2.35525E-06 | 0.004278083 |
| 1816.439964 | 87.920377  | 1.98424E-06 | 0.003604254 |
| 1816.479964 | 77.346559  | 1.7456E-06  | 0.003170855 |
| 1816.519964 | 77.910308  | 1.75833E-06 | 0.003194036 |
| 1816.559964 | 78.597513  | 1.77384E-06 | 0.00322228  |
| 1816.599964 | 77.237999  | 1.74315E-06 | 0.003166614 |
| 1816.639964 | 79.376775  | 1.79142E-06 | 0.003254371 |
| 1816.679964 | 71.412364  | 1.61168E-06 | 0.002927902 |
| 1816.719964 | 78.135645  | 1.76341E-06 | 0.003203627 |
| 1816.759964 | 111.468403 | 2.51569E-06 | 0.004570399 |
| 1816.799964 | 126.554393 | 2.85616E-06 | 0.005189065 |
| 1816.839964 | 118.228322 | 2.66825E-06 | 0.004847781 |
| 1816.879964 | 113.670402 | 2.56538E-06 | 0.004660992 |
| 1816.919964 | 99.393905  | 2.24318E-06 | 0.004075682 |
| 1816.959964 | 71.56686   | 1.61516E-06 | 0.002934689 |
| 1816.999964 | 71.533355  | 1.61441E-06 | 0.00293338  |
| 1817.039964 | 78.683773  | 1.77578E-06 | 0.003226669 |

|             |            |             |             |
|-------------|------------|-------------|-------------|
| 1817.079964 | 72.852904  | 1.64419E-06 | 0.002987622 |
| 1817.119964 | 78.348734  | 1.76822E-06 | 0.003213071 |
| 1817.159964 | 95.486659  | 2.155E-06   | 0.003915981 |
| 1817.199964 | 102.24425  | 2.30751E-06 | 0.004193208 |
| 1817.239964 | 87.829188  | 1.98218E-06 | 0.003602101 |
| 1817.279964 | 80.0284    | 1.80613E-06 | 0.003282243 |
| 1817.319964 | 90.941504  | 2.05242E-06 | 0.003729909 |
| 1817.359964 | 106.910675 | 2.41283E-06 | 0.004384972 |
| 1817.399964 | 107.06483  | 2.4163E-06  | 0.004391391 |
| 1817.439964 | 105.764654 | 2.38696E-06 | 0.004338158 |
| 1817.479964 | 103.211522 | 2.32934E-06 | 0.004233529 |
| 1817.519964 | 101.551664 | 2.29188E-06 | 0.004165537 |
| 1817.559964 | 102.684195 | 2.31744E-06 | 0.004212085 |
| 1817.599964 | 108.281233 | 2.44376E-06 | 0.004441772 |
| 1817.639964 | 109.993776 | 2.48241E-06 | 0.004512121 |
| 1817.679964 | 106.368136 | 2.40058E-06 | 0.004363487 |
| 1817.719964 | 105.198663 | 2.37419E-06 | 0.004315608 |
| 1817.759964 | 96.466918  | 2.17712E-06 | 0.003957489 |
| 1817.799964 | 88.271132  | 1.99216E-06 | 0.003621342 |
| 1817.839964 | 90.034651  | 2.03196E-06 | 0.003693772 |
| 1817.879964 | 97.971745  | 2.21109E-06 | 0.004019489 |
| 1817.919964 | 94.441866  | 2.13142E-06 | 0.003874753 |
| 1817.959964 | 93.450186  | 2.10904E-06 | 0.003834151 |
| 1817.999964 | 95.386115  | 2.15273E-06 | 0.003913666 |
| 1818.039964 | 98.542686  | 2.22397E-06 | 0.004043268 |
| 1818.079964 | 99.899134  | 2.25458E-06 | 0.004099015 |
| 1818.119964 | 97.618557  | 2.20311E-06 | 0.004005527 |
| 1818.159964 | 92.656041  | 2.09112E-06 | 0.003801987 |
| 1818.199964 | 101.652426 | 2.29415E-06 | 0.00417123  |
| 1818.239964 | 98.817173  | 2.23017E-06 | 0.004054977 |
| 1818.279964 | 79.276322  | 1.78916E-06 | 0.003253187 |
| 1818.319964 | 92.42392   | 2.08588E-06 | 0.003792796 |
| 1818.359964 | 119.071628 | 2.68728E-06 | 0.004886444 |
| 1818.399964 | 112.635871 | 2.54203E-06 | 0.004622436 |
| 1818.439964 | 96.783085  | 2.18426E-06 | 0.003971945 |
| 1818.479964 | 86.076906  | 1.94264E-06 | 0.003532644 |
| 1818.519964 | 83.749266  | 1.8901E-06  | 0.003437192 |
| 1818.559964 | 89.024869  | 2.00917E-06 | 0.003653791 |
| 1818.599964 | 82.046229  | 1.85167E-06 | 0.003367445 |
| 1818.639964 | 70.598922  | 1.59332E-06 | 0.002897674 |
| 1818.679964 | 76.223597  | 1.72026E-06 | 0.003128603 |
| 1818.719964 | 83.412954  | 1.88251E-06 | 0.003423766 |
| 1818.759964 | 84.672475  | 1.91094E-06 | 0.003475541 |
| 1818.799964 | 100.584462 | 2.27005E-06 | 0.004128769 |
| 1818.839964 | 111.590598 | 2.51844E-06 | 0.004580647 |
| 1818.879964 | 95.251008  | 2.14968E-06 | 0.003910015 |

|             |            |             |             |
|-------------|------------|-------------|-------------|
| 1818.919964 | 87.262481  | 1.96939E-06 | 0.003582168 |
| 1818.959964 | 90.375746  | 2.03965E-06 | 0.00371005  |
| 1818.999964 | 81.434404  | 1.83786E-06 | 0.003343069 |
| 1819.039964 | 81.015781  | 1.82841E-06 | 0.003325957 |
| 1819.079964 | 89.998598  | 2.03114E-06 | 0.003694812 |
| 1819.119964 | 85.549872  | 1.93074E-06 | 0.00351225  |
| 1819.159964 | 78.366188  | 1.76862E-06 | 0.003217395 |
| 1819.199964 | 96.12489   | 2.1694E-06  | 0.003946581 |
| 1819.239964 | 112.911446 | 2.54825E-06 | 0.004635886 |
| 1819.279964 | 109.575364 | 2.47296E-06 | 0.004499013 |
| 1819.319964 | 128.397339 | 2.89775E-06 | 0.005271933 |
| 1819.359964 | 132.191129 | 2.98337E-06 | 0.005427823 |
| 1819.399964 | 114.985739 | 2.59507E-06 | 0.004721467 |
| 1819.439964 | 100.00227  | 2.25691E-06 | 0.004106316 |
| 1819.479964 | 96.625336  | 2.1807E-06  | 0.003967739 |
| 1819.519964 | 93.408969  | 2.10811E-06 | 0.003835749 |
| 1819.559964 | 98.516451  | 2.22338E-06 | 0.004045572 |
| 1819.599964 | 107.590922 | 2.42818E-06 | 0.004418311 |
| 1819.639964 | 89.871848  | 2.02828E-06 | 0.003690744 |
| 1819.679964 | 72.405829  | 1.6341E-06  | 0.002973537 |
| 1819.719964 | 76.356225  | 1.72325E-06 | 0.003135839 |
| 1819.759964 | 88.849977  | 2.00522E-06 | 0.003649019 |
| 1819.799964 | 82.635801  | 1.86497E-06 | 0.003393881 |
| 1819.839964 | 93.285495  | 2.10532E-06 | 0.003831352 |
| 1819.879964 | 96.4198    | 2.17606E-06 | 0.003960169 |
| 1819.919964 | 90.412018  | 2.04047E-06 | 0.003713498 |
| 1819.959964 | 95.931906  | 2.16505E-06 | 0.003940303 |
| 1819.999964 | 109.617702 | 2.47392E-06 | 0.004502532 |
| 1820.039964 | 111.957846 | 2.52673E-06 | 0.004598754 |
| 1820.079964 | 93.270857  | 2.10499E-06 | 0.003831256 |
| 1820.119964 | 76.855014  | 1.73451E-06 | 0.003157017 |
| 1820.159964 | 73.310567  | 1.65452E-06 | 0.003011486 |
| 1820.199964 | 70.055921  | 1.58106E-06 | 0.002877854 |
| 1820.239964 | 75.795119  | 1.71059E-06 | 0.003113685 |
| 1820.279964 | 98.608431  | 2.22545E-06 | 0.004050951 |
| 1820.319964 | 108.972469 | 2.45936E-06 | 0.004476816 |
| 1820.359964 | 100.093034 | 2.25896E-06 | 0.004112121 |
| 1820.399964 | 85.688399  | 1.93387E-06 | 0.003520413 |
| 1820.439964 | 83.751955  | 1.89016E-06 | 0.003440932 |
| 1820.479964 | 85.923878  | 1.93918E-06 | 0.003530242 |
| 1820.519964 | 91.57119   | 2.06663E-06 | 0.003762349 |
| 1820.559964 | 99.183265  | 2.23843E-06 | 0.004075193 |
| 1820.599964 | 105.341498 | 2.37741E-06 | 0.004328314 |
| 1820.639964 | 99.880629  | 2.25417E-06 | 0.004104026 |
| 1820.679964 | 92.380152  | 2.08489E-06 | 0.00379592  |
| 1820.719964 | 85.726037  | 1.93472E-06 | 0.003522578 |

|             |            |             |             |
|-------------|------------|-------------|-------------|
| 1820.759964 | 82.023832  | 1.85116E-06 | 0.003370525 |
| 1820.799964 | 96.724161  | 2.18293E-06 | 0.003974678 |
| 1820.839964 | 103.782754 | 2.34223E-06 | 0.00426483  |
| 1820.879964 | 92.149948  | 2.0797E-06  | 0.003786877 |
| 1820.919964 | 85.775258  | 1.93583E-06 | 0.003524988 |
| 1820.959964 | 93.888269  | 2.11893E-06 | 0.003858482 |
| 1820.999964 | 102.849386 | 2.32117E-06 | 0.004226846 |
| 1821.039964 | 102.16767  | 2.30578E-06 | 0.004198921 |
| 1821.079964 | 85.689178  | 1.93389E-06 | 0.00352176  |
| 1821.119964 | 71.028492  | 1.60301E-06 | 0.002919281 |
| 1821.159964 | 81.329633  | 1.8355E-06  | 0.003342733 |
| 1821.199964 | 104.411079 | 2.35641E-06 | 0.004291499 |
| 1821.239964 | 105.635933 | 2.38406E-06 | 0.004341938 |
| 1821.279964 | 97.647323  | 2.20376E-06 | 0.004013671 |
| 1821.319964 | 110.464262 | 2.49302E-06 | 0.004540595 |
| 1821.359964 | 109.248957 | 2.4656E-06  | 0.004490739 |
| 1821.399964 | 93.905657  | 2.11932E-06 | 0.003860129 |
| 1821.439964 | 82.27958   | 1.85694E-06 | 0.003382297 |
| 1821.479964 | 94.088984  | 2.12346E-06 | 0.003867835 |
| 1821.519964 | 98.486582  | 2.2227E-06  | 0.004048701 |
| 1821.559964 | 106.663693 | 2.40725E-06 | 0.004384952 |
| 1821.599964 | 101.066051 | 2.28092E-06 | 0.004154924 |
| 1821.639964 | 93.056796  | 2.10016E-06 | 0.00382574  |
| 1821.679964 | 96.126563  | 2.16944E-06 | 0.00395203  |
| 1821.719964 | 95.190671  | 2.14832E-06 | 0.003913639 |
| 1821.759964 | 92.115011  | 2.07891E-06 | 0.00378727  |
| 1821.799964 | 88.651714  | 2.00075E-06 | 0.003644958 |
| 1821.839964 | 90.654026  | 2.04594E-06 | 0.003727366 |
| 1821.879964 | 95.276275  | 2.15025E-06 | 0.003917503 |
| 1821.919964 | 105.12797  | 2.37259E-06 | 0.004322672 |
| 1821.959964 | 114.673292 | 2.58802E-06 | 0.004715262 |
| 1821.999964 | 101.664523 | 2.29443E-06 | 0.004180445 |
| 1822.039964 | 84.799957  | 1.91382E-06 | 0.003487051 |
| 1822.079964 | 79.058074  | 1.78423E-06 | 0.003251011 |
| 1822.119964 | 74.787613  | 1.68785E-06 | 0.003075469 |
| 1822.159964 | 72.944133  | 1.64625E-06 | 0.002999726 |
| 1822.199964 | 101.094107 | 2.28155E-06 | 0.004157446 |
| 1822.239964 | 112.679557 | 2.54302E-06 | 0.004633994 |
| 1822.279964 | 107.294008 | 2.42148E-06 | 0.004412608 |
| 1822.319964 | 102.83597  | 2.32086E-06 | 0.004229358 |
| 1822.359964 | 97.548759  | 2.20154E-06 | 0.004011998 |
| 1822.399964 | 96.929294  | 2.18756E-06 | 0.003986608 |
| 1822.439964 | 101.748852 | 2.29633E-06 | 0.004184923 |
| 1822.479964 | 93.788762  | 2.11668E-06 | 0.00385761  |
| 1822.519964 | 72.717324  | 1.64113E-06 | 0.00299099  |
| 1822.559964 | 66.191804  | 1.49386E-06 | 0.002722644 |

|             |            |             |             |
|-------------|------------|-------------|-------------|
| 1822.599964 | 82.415253  | 1.86E-06    | 0.003390031 |
| 1822.639964 | 101.747116 | 2.29629E-06 | 0.004185311 |
| 1822.679964 | 108.260262 | 2.44328E-06 | 0.004453324 |
| 1822.719964 | 95.395378  | 2.15294E-06 | 0.003924208 |
| 1822.759964 | 73.785191  | 1.66523E-06 | 0.003035313 |
| 1822.799964 | 74.154818  | 1.67357E-06 | 0.003050585 |
| 1822.839964 | 81.921103  | 1.84885E-06 | 0.003370149 |
| 1822.879964 | 83.644841  | 1.88775E-06 | 0.003441137 |
| 1822.919964 | 87.40852   | 1.97269E-06 | 0.003596053 |
| 1822.959964 | 95.65152   | 2.15872E-06 | 0.003935263 |
| 1822.999964 | 90.700565  | 2.04699E-06 | 0.003731654 |
| 1823.039964 | 84.895904  | 1.91598E-06 | 0.003492912 |
| 1823.079964 | 90.148977  | 2.03454E-06 | 0.003709123 |
| 1823.119964 | 98.750486  | 2.22866E-06 | 0.004063116 |
| 1823.159964 | 102.171801 | 2.30588E-06 | 0.004203979 |
| 1823.199964 | 99.185257  | 2.23847E-06 | 0.004081184 |
| 1823.239964 | 104.97033  | 2.36903E-06 | 0.004319318 |
| 1823.279964 | 120.377101 | 2.71674E-06 | 0.004953384 |
| 1823.319964 | 124.513874 | 2.8101E-06  | 0.00512372  |
| 1823.359964 | 128.017444 | 2.88918E-06 | 0.005268007 |
| 1823.399964 | 130.941872 | 2.95518E-06 | 0.005388467 |
| 1823.439964 | 116.476697 | 2.62872E-06 | 0.004793307 |
| 1823.479964 | 106.115854 | 2.39489E-06 | 0.004367028 |
| 1823.519964 | 100.098748 | 2.25909E-06 | 0.004119494 |
| 1823.559964 | 94.115146  | 2.12405E-06 | 0.003873328 |
| 1823.599964 | 90.81487   | 2.04957E-06 | 0.003737587 |
| 1823.639964 | 90.616897  | 2.0451E-06  | 0.003729521 |
| 1823.679964 | 88.953736  | 2.00756E-06 | 0.00366115  |
| 1823.719964 | 81.374234  | 1.8365E-06  | 0.003349267 |
| 1823.759964 | 77.401777  | 1.74685E-06 | 0.003185836 |
| 1823.799964 | 76.222003  | 1.72022E-06 | 0.003137345 |
| 1823.839964 | 71.038236  | 1.60323E-06 | 0.002924042 |
| 1823.879964 | 68.119507  | 1.53736E-06 | 0.002803964 |
| 1823.919964 | 76.209497  | 1.71994E-06 | 0.003137037 |
| 1823.959964 | 84.354499  | 1.90376E-06 | 0.003472388 |
| 1823.999964 | 82.82518   | 1.86925E-06 | 0.00340951  |
| 1824.039964 | 79.149572  | 1.7863E-06  | 0.003258275 |
| 1824.079964 | 71.960703  | 1.62405E-06 | 0.002962402 |
| 1824.119964 | 75.315896  | 1.69977E-06 | 0.003100593 |
| 1824.159964 | 85.472748  | 1.929E-06   | 0.003518806 |
| 1824.199964 | 86.946198  | 1.96225E-06 | 0.003579545 |
| 1824.239964 | 76.554484  | 1.72773E-06 | 0.003151791 |
| 1824.279964 | 78.615822  | 1.77425E-06 | 0.003236728 |
| 1824.319964 | 78.579313  | 1.77343E-06 | 0.003235296 |
| 1824.359964 | 70.120662  | 1.58253E-06 | 0.002887096 |
| 1824.399964 | 63.698081  | 1.43758E-06 | 0.002622715 |

|             |            |             |             |
|-------------|------------|-------------|-------------|
| 1824.439964 | 71.46619   | 1.61289E-06 | 0.002942625 |
| 1824.479964 | 79.057295  | 1.78421E-06 | 0.003255261 |
| 1824.519964 | 84.582856  | 1.90892E-06 | 0.003482858 |
| 1824.559964 | 102.155316 | 2.3055E-06  | 0.004206529 |
| 1824.599964 | 99.900469  | 2.25461E-06 | 0.004113769 |
| 1824.639964 | 95.118659  | 2.1467E-06  | 0.003916947 |
| 1824.679964 | 95.094878  | 2.14616E-06 | 0.003916053 |
| 1824.719964 | 86.749861  | 1.95782E-06 | 0.00357248  |
| 1824.759964 | 90.719886  | 2.04742E-06 | 0.003736053 |
| 1824.799964 | 99.345582  | 2.24209E-06 | 0.004091368 |
| 1824.839964 | 94.742096  | 2.1382E-06  | 0.003901868 |
| 1824.879964 | 85.626055  | 1.93246E-06 | 0.003526509 |
| 1824.919964 | 86.106282  | 1.9433E-06  | 0.003546365 |
| 1824.959964 | 84.616     | 1.90967E-06 | 0.003485063 |
| 1824.999964 | 79.513385  | 1.79451E-06 | 0.003274974 |
| 1825.039964 | 85.028773  | 1.91898E-06 | 0.003502217 |
| 1825.079964 | 91.567397  | 2.06655E-06 | 0.003771616 |
| 1825.119964 | 93.441691  | 2.10885E-06 | 0.003848902 |
| 1825.159964 | 96.227991  | 2.17173E-06 | 0.003963758 |
| 1825.199964 | 97.39053   | 2.19797E-06 | 0.004011732 |
| 1825.239964 | 92.538395  | 2.08846E-06 | 0.003811946 |
| 1825.279964 | 84.968672  | 1.91762E-06 | 0.003500202 |
| 1825.319964 | 82.119561  | 1.85332E-06 | 0.003382909 |
| 1825.359964 | 92.104593  | 2.07867E-06 | 0.003794325 |
| 1825.399964 | 106.399556 | 2.40129E-06 | 0.004383314 |
| 1825.439964 | 115.083151 | 2.59727E-06 | 0.004741154 |
| 1825.479964 | 131.196876 | 2.96093E-06 | 0.00540512  |
| 1825.519964 | 141.030444 | 3.18286E-06 | 0.005810376 |
| 1825.559964 | 121.285378 | 2.73724E-06 | 0.004996999 |
| 1825.599964 | 111.576983 | 2.51814E-06 | 0.004597111 |
| 1825.639964 | 100.705754 | 2.27279E-06 | 0.004149294 |
| 1825.679964 | 92.753701  | 2.09332E-06 | 0.003821736 |
| 1825.719964 | 86.099406  | 1.94314E-06 | 0.003547636 |
| 1825.759964 | 71.413013  | 1.61169E-06 | 0.002942563 |
| 1825.799964 | 73.310039  | 1.65451E-06 | 0.003020796 |
| 1825.839964 | 74.615122  | 1.68396E-06 | 0.00307464  |
| 1825.879964 | 65.714712  | 1.48309E-06 | 0.002707943 |
| 1825.919964 | 61.106661  | 1.37909E-06 | 0.002518112 |
| 1825.959964 | 68.829256  | 1.55338E-06 | 0.00283641  |
| 1825.999964 | 80.874221  | 1.82522E-06 | 0.003332849 |
| 1826.039964 | 74.979256  | 1.69218E-06 | 0.003089984 |
| 1826.079964 | 80.525031  | 1.81734E-06 | 0.003318604 |
| 1826.119964 | 101.199372 | 2.28393E-06 | 0.004170728 |
| 1826.159964 | 89.47229   | 2.01926E-06 | 0.003687501 |
| 1826.199964 | 82.045292  | 1.85165E-06 | 0.003381479 |
| 1826.239964 | 84.051659  | 1.89693E-06 | 0.003464247 |



|             |            |             |             |
|-------------|------------|-------------|-------------|
| 1826.279964 | 81.366939  | 1.83634E-06 | 0.003353668 |
| 1826.319964 | 78.655583  | 1.77515E-06 | 0.003241986 |
| 1826.359964 | 75.50849   | 1.70412E-06 | 0.003112339 |
| 1826.399964 | 84.620961  | 1.90978E-06 | 0.003488017 |
| 1826.439964 | 98.11196   | 2.21425E-06 | 0.004044195 |
| 1826.479964 | 92.997802  | 2.09883E-06 | 0.003833473 |
| 1826.519964 | 75.119955  | 1.69535E-06 | 0.003096596 |
| 1826.559964 | 68.276787  | 1.54091E-06 | 0.002814568 |
| 1826.599964 | 80.363118  | 1.81368E-06 | 0.003312874 |
| 1826.639964 | 95.562548  | 2.15671E-06 | 0.003939539 |
| 1826.679964 | 97.792495  | 2.20704E-06 | 0.004031556 |
| 1826.719964 | 102.895961 | 2.32222E-06 | 0.004242043 |
| 1826.759964 | 98.734443  | 2.2283E-06  | 0.004070567 |
| 1826.799964 | 98.909951  | 2.23226E-06 | 0.004077892 |
| 1826.839964 | 92.65697   | 2.09114E-06 | 0.003820176 |
| 1826.879964 | 81.958128  | 1.84968E-06 | 0.003379145 |
| 1826.919964 | 77.128554  | 1.74068E-06 | 0.00318009  |
| 1826.959964 | 76.599346  | 1.72874E-06 | 0.00315834  |
| 1826.999964 | 72.925192  | 1.64582E-06 | 0.003006913 |
| 1827.039964 | 64.144567  | 1.44765E-06 | 0.002644921 |
| 1827.079964 | 69.084914  | 1.55915E-06 | 0.002848692 |
| 1827.119964 | 70.131259  | 1.58276E-06 | 0.002891901 |
| 1827.159964 | 81.289718  | 1.8346E-06  | 0.0033521   |
| 1827.199964 | 88.809395  | 2.0043E-06  | 0.003662265 |
| 1827.239964 | 88.995679  | 2.00851E-06 | 0.003670027 |
| 1827.279964 | 82.353977  | 1.85861E-06 | 0.003396209 |
| 1827.319964 | 90.098912  | 2.03341E-06 | 0.003715685 |
| 1827.359964 | 104.157933 | 2.3507E-06  | 0.004295574 |
| 1827.399964 | 94.747863  | 2.13833E-06 | 0.003907579 |
| 1827.439964 | 95.622896  | 2.15808E-06 | 0.003943754 |
| 1827.479964 | 107.111957 | 2.41737E-06 | 0.004417691 |
| 1827.519964 | 102.74864  | 2.31889E-06 | 0.004237825 |
| 1827.559964 | 87.740785  | 1.98019E-06 | 0.003618911 |
| 1827.599964 | 77.806486  | 1.75598E-06 | 0.003209236 |
| 1827.639964 | 63.276024  | 1.42805E-06 | 0.002609964 |
| 1827.679964 | 60.596575  | 1.36758E-06 | 0.002499499 |
| 1827.719964 | 79.155056  | 1.78642E-06 | 0.003265074 |
| 1827.759964 | 82.586858  | 1.86387E-06 | 0.003406708 |
| 1827.799964 | 76.28375   | 1.72162E-06 | 0.003146773 |
| 1827.839964 | 77.021623  | 1.73827E-06 | 0.003177281 |
| 1827.879964 | 73.00398   | 1.6476E-06  | 0.003011612 |
| 1827.919964 | 76.544777  | 1.72751E-06 | 0.003157748 |
| 1827.959964 | 85.851641  | 1.93755E-06 | 0.003541767 |
| 1827.999964 | 83.751663  | 1.89016E-06 | 0.003455209 |
| 1828.039964 | 83.912407  | 1.89379E-06 | 0.003461917 |
| 1828.079964 | 79.831349  | 1.80168E-06 | 0.003293619 |

|             |            |             |             |
|-------------|------------|-------------|-------------|
| 1828.119964 | 87.25444   | 1.96921E-06 | 0.003599954 |
| 1828.159964 | 94.01986   | 2.1219E-06  | 0.003879168 |
| 1828.199964 | 92.066177  | 2.07781E-06 | 0.003798644 |
| 1828.239964 | 87.566874  | 1.97626E-06 | 0.003613082 |
| 1828.279964 | 100.376631 | 2.26536E-06 | 0.004141714 |
| 1828.319964 | 115.886631 | 2.6154E-06  | 0.004781788 |
| 1828.359964 | 104.513657 | 2.35873E-06 | 0.004312603 |
| 1828.399964 | 100.022115 | 2.25736E-06 | 0.004127357 |
| 1828.439964 | 94.263933  | 2.12741E-06 | 0.003889834 |
| 1828.479964 | 78.740088  | 1.77705E-06 | 0.003249308 |
| 1828.519964 | 75.813018  | 1.71099E-06 | 0.003128587 |
| 1828.559964 | 77.092189  | 1.73986E-06 | 0.003181444 |
| 1828.599964 | 85.465024  | 1.92883E-06 | 0.003527052 |
| 1828.639964 | 81.254937  | 1.83381E-06 | 0.00335338  |
| 1828.679964 | 68.821583  | 1.55321E-06 | 0.002840319 |
| 1828.719964 | 70.211586  | 1.58458E-06 | 0.002897749 |
| 1828.759964 | 91.016745  | 2.05412E-06 | 0.003756495 |
| 1828.799964 | 115.446007 | 2.60546E-06 | 0.004764857 |
| 1828.839964 | 109.669182 | 2.47508E-06 | 0.004526526 |
| 1828.879964 | 113.01161  | 2.55051E-06 | 0.004664585 |
| 1828.919964 | 108.564386 | 2.45015E-06 | 0.004481123 |
| 1828.959964 | 101.6633   | 2.2944E-06  | 0.004196364 |
| 1828.999964 | 87.238807  | 1.96886E-06 | 0.003601042 |
| 1829.039964 | 83.710681  | 1.88923E-06 | 0.003455484 |
| 1829.079964 | 91.65204   | 2.06846E-06 | 0.003783377 |
| 1829.119964 | 98.017613  | 2.21212E-06 | 0.004046235 |
| 1829.159964 | 96.696826  | 2.18231E-06 | 0.003991799 |
| 1829.199964 | 89.872828  | 2.0283E-06  | 0.003710175 |
| 1829.239964 | 83.520609  | 1.88494E-06 | 0.003448015 |
| 1829.279964 | 75.398134  | 1.70163E-06 | 0.003112759 |
| 1829.319964 | 76.682581  | 1.73062E-06 | 0.003165856 |
| 1829.359964 | 82.326686  | 1.858E-06   | 0.003398948 |
| 1829.399964 | 90.479977  | 2.04201E-06 | 0.003735648 |
| 1829.439964 | 100.328835 | 2.26428E-06 | 0.004142368 |
| 1829.479964 | 102.510959 | 2.31353E-06 | 0.004232556 |
| 1829.519964 | 105.062399 | 2.37111E-06 | 0.004337997 |
| 1829.559964 | 93.091355  | 2.10094E-06 | 0.0038438   |
| 1829.599964 | 71.863659  | 1.62186E-06 | 0.00296736  |
| 1829.639964 | 56.149762  | 1.26722E-06 | 0.00231856  |
| 1829.679964 | 69.138559  | 1.56036E-06 | 0.002854961 |
| 1829.719964 | 89.611688  | 2.02241E-06 | 0.003700446 |
| 1829.759964 | 98.606732  | 2.22542E-06 | 0.004071978 |
| 1829.799964 | 90.788081  | 2.04896E-06 | 0.003749188 |
| 1829.839964 | 83.670968  | 1.88834E-06 | 0.003455355 |
| 1829.879964 | 85.797509  | 1.93633E-06 | 0.003543252 |
| 1829.919964 | 89.106466  | 2.01101E-06 | 0.003679985 |

|             |            |             |             |
|-------------|------------|-------------|-------------|
| 1829.959964 | 92.117695  | 2.07897E-06 | 0.003804428 |
| 1829.999964 | 90.003384  | 2.03125E-06 | 0.003717189 |
| 1830.039964 | 86.241938  | 1.94636E-06 | 0.003561917 |
| 1830.079964 | 93.892159  | 2.11902E-06 | 0.003877967 |
| 1830.119964 | 89.168634  | 2.01241E-06 | 0.003682955 |
| 1830.159964 | 84.078703  | 1.89754E-06 | 0.0034728   |
| 1830.199964 | 90.926413  | 2.05208E-06 | 0.003755721 |
| 1830.239964 | 86.972967  | 1.96286E-06 | 0.003592502 |
| 1830.279964 | 72.659468  | 1.63982E-06 | 0.003001335 |
| 1830.319964 | 74.017636  | 1.67047E-06 | 0.003057504 |
| 1830.359964 | 86.060535  | 1.94227E-06 | 0.003555047 |
| 1830.399964 | 89.973432  | 2.03058E-06 | 0.003716764 |
| 1830.439964 | 82.383544  | 1.85928E-06 | 0.003403304 |
| 1830.479964 | 82.336806  | 1.85823E-06 | 0.003401447 |
| 1830.519964 | 84.201162  | 1.9003E-06  | 0.003478542 |
| 1830.559964 | 88.433458  | 1.99582E-06 | 0.003653468 |
| 1830.599964 | 100.713383 | 2.27296E-06 | 0.004160882 |
| 1830.639964 | 104.281411 | 2.35349E-06 | 0.004308386 |
| 1830.679964 | 89.020245  | 2.00906E-06 | 0.003677951 |
| 1830.719964 | 76.934173  | 1.7363E-06  | 0.003178674 |
| 1830.759964 | 71.204499  | 1.60699E-06 | 0.002942006 |
| 1830.799964 | 65.926283  | 1.48786E-06 | 0.002723982 |
| 1830.839964 | 84.313135  | 1.90283E-06 | 0.003483777 |
| 1830.879964 | 101.331772 | 2.28692E-06 | 0.00418707  |
| 1830.919964 | 106.55764  | 2.40486E-06 | 0.004403102 |
| 1830.959964 | 93.433492  | 2.10866E-06 | 0.003860879 |
| 1830.999964 | 83.640563  | 1.88765E-06 | 0.003456289 |
| 1831.039964 | 73.887571  | 1.66754E-06 | 0.003053332 |
| 1831.079964 | 72.407412  | 1.63413E-06 | 0.002992231 |
| 1831.119964 | 85.004461  | 1.91843E-06 | 0.00351288  |
| 1831.159964 | 99.681091  | 2.24966E-06 | 0.004119494 |
| 1831.199964 | 108.245827 | 2.44296E-06 | 0.004473544 |
| 1831.239964 | 109.478161 | 2.47077E-06 | 0.004524572 |
| 1831.279964 | 92.736843  | 2.09294E-06 | 0.003832762 |
| 1831.319964 | 82.450605  | 1.8608E-06  | 0.003407712 |
| 1831.359964 | 90.308177  | 2.03813E-06 | 0.003732549 |
| 1831.399964 | 100.85425  | 2.27614E-06 | 0.004168523 |
| 1831.439964 | 93.95764   | 2.12049E-06 | 0.003883556 |
| 1831.479964 | 85.54894   | 1.93072E-06 | 0.003536076 |
| 1831.519964 | 78.580195  | 1.77345E-06 | 0.003248101 |
| 1831.559964 | 72.131395  | 1.62791E-06 | 0.002981606 |
| 1831.599964 | 82.517338  | 1.8623E-06  | 0.003410991 |
| 1831.639964 | 86.71601   | 1.95706E-06 | 0.003584629 |
| 1831.679964 | 81.835227  | 1.84691E-06 | 0.003382943 |
| 1831.719964 | 82.991653  | 1.87301E-06 | 0.003430823 |
| 1831.759964 | 83.517455  | 1.88487E-06 | 0.003452634 |

|             |            |             |             |
|-------------|------------|-------------|-------------|
| 1831.799964 | 78.739383  | 1.77704E-06 | 0.003255179 |
| 1831.839964 | 79.187572  | 1.78715E-06 | 0.003273779 |
| 1831.879964 | 76.739485  | 1.7319E-06  | 0.003172639 |
| 1831.919964 | 78.422286  | 1.76988E-06 | 0.003242282 |
| 1831.959964 | 71.18936   | 1.60664E-06 | 0.002943309 |
| 1831.999964 | 67.563463  | 1.52481E-06 | 0.002793458 |
| 1832.039964 | 67.617592  | 1.52603E-06 | 0.002795757 |
| 1832.079964 | 63.201106  | 1.42636E-06 | 0.002613207 |
| 1832.119964 | 61.481418  | 1.38755E-06 | 0.002542158 |
| 1832.159964 | 64.14236   | 1.4476E-06  | 0.002652242 |
| 1832.199964 | 79.841341  | 1.80191E-06 | 0.003301456 |
| 1832.239964 | 92.606513  | 2.09E-06    | 0.003829382 |
| 1832.279964 | 93.415212  | 2.10825E-06 | 0.003862906 |
| 1832.319964 | 87.765674  | 1.98075E-06 | 0.003629366 |
| 1832.359964 | 95.349309  | 2.1519E-06  | 0.003943057 |
| 1832.399964 | 106.734774 | 2.40886E-06 | 0.004413986 |
| 1832.439964 | 104.910109 | 2.36768E-06 | 0.004338622 |
| 1832.479964 | 91.485564  | 2.0647E-06  | 0.003783525 |
| 1832.519964 | 85.344797  | 1.92611E-06 | 0.003529641 |
| 1832.559964 | 93.419503  | 2.10835E-06 | 0.003863674 |
| 1832.599964 | 88.170495  | 1.98989E-06 | 0.003646664 |
| 1832.639964 | 78.281638  | 1.76671E-06 | 0.003237739 |
| 1832.679964 | 84.341717  | 1.90348E-06 | 0.003488461 |
| 1832.719964 | 96.887625  | 2.18662E-06 | 0.00400746  |
| 1832.759964 | 93.51054   | 2.1104E-06  | 0.003867861 |
| 1832.799964 | 86.187381  | 1.94513E-06 | 0.003565033 |
| 1832.839964 | 84.120259  | 1.89848E-06 | 0.003479605 |
| 1832.879964 | 83.023036  | 1.87371E-06 | 0.003434293 |
| 1832.919964 | 79.728776  | 1.79937E-06 | 0.003298096 |
| 1832.959964 | 74.400922  | 1.67913E-06 | 0.003077769 |
| 1832.999963 | 76.571736  | 1.72812E-06 | 0.003167639 |
| 1833.039963 | 81.579178  | 1.84113E-06 | 0.003374862 |
| 1833.079963 | 85.080274  | 1.92014E-06 | 0.003519776 |
| 1833.119963 | 86.350668  | 1.94881E-06 | 0.00357241  |
| 1833.159963 | 80.00598   | 1.80562E-06 | 0.003309997 |
| 1833.199963 | 78.637569  | 1.77474E-06 | 0.003253454 |
| 1833.239963 | 91.791295  | 2.0716E-06  | 0.003797743 |
| 1833.279963 | 99.396866  | 2.24325E-06 | 0.004112503 |
| 1833.319963 | 90.98683   | 2.05345E-06 | 0.003764624 |
| 1833.359963 | 89.559645  | 2.02124E-06 | 0.003705654 |
| 1833.399963 | 83.712866  | 1.88928E-06 | 0.003463811 |
| 1833.439963 | 90.937349  | 2.05233E-06 | 0.003762823 |
| 1833.479963 | 95.711383  | 2.16007E-06 | 0.00396045  |
| 1833.519963 | 83.194278  | 1.87758E-06 | 0.003442579 |
| 1833.559963 | 67.963833  | 1.53385E-06 | 0.002812404 |
| 1833.599963 | 73.525363  | 1.65937E-06 | 0.003042612 |

|             |            |             |             |
|-------------|------------|-------------|-------------|
| 1833.639963 | 92.42738   | 2.08596E-06 | 0.003824895 |
| 1833.679963 | 95.441051  | 2.15397E-06 | 0.003949695 |
| 1833.719963 | 88.6114    | 1.99984E-06 | 0.003667139 |
| 1833.759963 | 78.000479  | 1.76036E-06 | 0.003228082 |
| 1833.799963 | 83.599747  | 1.88673E-06 | 0.003459885 |
| 1833.839963 | 89.755229  | 2.02565E-06 | 0.003714719 |
| 1833.879963 | 81.946648  | 1.84942E-06 | 0.003391617 |
| 1833.919963 | 77.598773  | 1.7513E-06  | 0.003211737 |
| 1833.959963 | 66.160688  | 1.49315E-06 | 0.002738386 |
| 1833.999963 | 78.394057  | 1.76924E-06 | 0.003244795 |
| 1834.039963 | 94.375882  | 2.12993E-06 | 0.003906381 |
| 1834.079963 | 82.379466  | 1.85919E-06 | 0.003409903 |
| 1834.119963 | 71.14936   | 1.60574E-06 | 0.002945123 |
| 1834.159963 | 73.036723  | 1.64834E-06 | 0.003023314 |
| 1834.199963 | 74.156752  | 1.67361E-06 | 0.003069744 |
| 1834.239963 | 84.362044  | 1.90393E-06 | 0.003492272 |
| 1834.279963 | 105.873275 | 2.38941E-06 | 0.004382851 |
| 1834.319963 | 99.210217  | 2.23904E-06 | 0.004107109 |
| 1834.359963 | 99.343731  | 2.24205E-06 | 0.004112726 |
| 1834.399963 | 113.397628 | 2.55923E-06 | 0.004694645 |
| 1834.439963 | 116.860276 | 2.63737E-06 | 0.004838104 |
| 1834.479963 | 105.869504 | 2.38933E-06 | 0.004383173 |
| 1834.519963 | 91.846507  | 2.07285E-06 | 0.003802681 |
| 1834.559963 | 89.263884  | 2.01456E-06 | 0.003695834 |
| 1834.599963 | 82.325994  | 1.85798E-06 | 0.003408656 |
| 1834.639963 | 80.495537  | 1.81667E-06 | 0.003332939 |
| 1834.679963 | 82.375881  | 1.85911E-06 | 0.00341087  |
| 1834.719963 | 82.605432  | 1.86429E-06 | 0.003420449 |
| 1834.759963 | 85.413028  | 1.92765E-06 | 0.003536781 |
| 1834.799963 | 90.952231  | 2.05267E-06 | 0.00376623  |
| 1834.839963 | 95.072623  | 2.14566E-06 | 0.003936937 |
| 1834.879963 | 99.784898  | 2.25201E-06 | 0.004132161 |
| 1834.919963 | 83.409834  | 1.88244E-06 | 0.003454134 |
| 1834.959963 | 75.204556  | 1.69726E-06 | 0.003114408 |
| 1834.999963 | 85.934815  | 1.93943E-06 | 0.003558852 |
| 1835.039963 | 93.854722  | 2.11817E-06 | 0.003886927 |
| 1835.079963 | 97.009471  | 2.18937E-06 | 0.004017667 |
| 1835.119963 | 100.533734 | 2.26891E-06 | 0.004163715 |
| 1835.159963 | 106.88259  | 2.41219E-06 | 0.004426757 |
| 1835.199963 | 120.295595 | 2.7149E-06  | 0.004982392 |
| 1835.239963 | 118.741381 | 2.67983E-06 | 0.004918127 |
| 1835.279963 | 104.893685 | 2.3673E-06  | 0.004344666 |
| 1835.319963 | 95.821314  | 2.16255E-06 | 0.003968978 |
| 1835.359963 | 84.617242  | 1.90969E-06 | 0.003504975 |
| 1835.399963 | 78.943866  | 1.78165E-06 | 0.003270046 |
| 1835.439963 | 87.968611  | 1.98533E-06 | 0.003643952 |

|             |            |             |             |
|-------------|------------|-------------|-------------|
| 1835.479963 | 88.561997  | 1.99872E-06 | 0.003668612 |
| 1835.519963 | 76.564001  | 1.72794E-06 | 0.003171674 |
| 1835.559963 | 77.704842  | 1.75369E-06 | 0.003219003 |
| 1835.599963 | 81.530673  | 1.84003E-06 | 0.003377566 |
| 1835.639963 | 79.181574  | 1.78702E-06 | 0.003280321 |
| 1835.679963 | 84.381745  | 1.90438E-06 | 0.003495829 |
| 1835.719963 | 80.283778  | 1.81189E-06 | 0.003326128 |
| 1835.759963 | 70.264603  | 1.58577E-06 | 0.002911101 |
| 1835.799963 | 81.437019  | 1.83792E-06 | 0.003374054 |
| 1835.839963 | 100.939038 | 2.27805E-06 | 0.004182142 |
| 1835.879963 | 96.846613  | 2.18569E-06 | 0.00401267  |
| 1835.919963 | 92.933164  | 2.09737E-06 | 0.003850607 |
| 1835.959963 | 89.978552  | 2.03069E-06 | 0.003728267 |
| 1835.999963 | 92.281118  | 2.08266E-06 | 0.003823757 |
| 1836.039963 | 82.915452  | 1.87129E-06 | 0.003435756 |
| 1836.079963 | 81.36872   | 1.83638E-06 | 0.003371738 |
| 1836.119963 | 97.482631  | 2.20005E-06 | 0.004039551 |
| 1836.159963 | 97.047641  | 2.19023E-06 | 0.004021613 |
| 1836.199963 | 92.156495  | 2.07984E-06 | 0.003819009 |
| 1836.239963 | 87.435668  | 1.9733E-06  | 0.003623455 |
| 1836.279963 | 87.986055  | 1.98572E-06 | 0.003646343 |
| 1836.319963 | 83.586517  | 1.88643E-06 | 0.003464091 |
| 1836.359963 | 88.822519  | 2.0046E-06  | 0.003681168 |
| 1836.399963 | 101.638613 | 2.29384E-06 | 0.004212411 |
| 1836.439963 | 101.317971 | 2.28661E-06 | 0.004199214 |
| 1836.479963 | 104.735775 | 2.36374E-06 | 0.004340962 |
| 1836.519963 | 93.304949  | 2.10576E-06 | 0.003867275 |
| 1836.559963 | 70.806138  | 1.598E-06   | 0.002934815 |
| 1836.599963 | 57.19303   | 1.29077E-06 | 0.002370623 |
| 1836.639963 | 71.659858  | 1.61726E-06 | 0.00297033  |
| 1836.679963 | 79.499951  | 1.7942E-06  | 0.003295377 |
| 1836.719963 | 79.500867  | 1.79422E-06 | 0.003295487 |
| 1836.759963 | 79.311419  | 1.78995E-06 | 0.003287705 |
| 1836.799963 | 66.159442  | 1.49313E-06 | 0.002742575 |
| 1836.839963 | 63.721911  | 1.43811E-06 | 0.002641587 |
| 1836.879963 | 89.691988  | 2.02422E-06 | 0.003718255 |
| 1836.919963 | 101.450885 | 2.28961E-06 | 0.004205821 |
| 1836.959963 | 91.472619  | 2.06441E-06 | 0.003792238 |
| 1836.999963 | 83.099833  | 1.87545E-06 | 0.003445197 |
| 1837.039963 | 67.128248  | 1.51499E-06 | 0.002783099 |
| 1837.079963 | 69.457168  | 1.56755E-06 | 0.002879718 |
| 1837.119963 | 90.669114  | 2.04628E-06 | 0.003759254 |
| 1837.159963 | 100.287299 | 2.26334E-06 | 0.004158126 |
| 1837.199963 | 91.95109   | 2.07521E-06 | 0.003812572 |
| 1837.239963 | 98.171401  | 2.21559E-06 | 0.004070574 |
| 1837.279963 | 99.574129  | 2.24725E-06 | 0.004128826 |

|             |            |             |             |
|-------------|------------|-------------|-------------|
| 1837.319963 | 92.071461  | 2.07792E-06 | 0.003817812 |
| 1837.359963 | 94.140629  | 2.12462E-06 | 0.003903697 |
| 1837.399963 | 93.063823  | 2.10032E-06 | 0.003859129 |
| 1837.439963 | 96.131319  | 2.16955E-06 | 0.003986418 |
| 1837.479963 | 105.583273 | 2.38287E-06 | 0.004378471 |
| 1837.519963 | 95.257585  | 2.14983E-06 | 0.003950357 |
| 1837.559963 | 84.095243  | 1.89791E-06 | 0.003487528 |
| 1837.599963 | 74.745268  | 1.6869E-06  | 0.003099841 |
| 1837.639963 | 72.231706  | 1.63017E-06 | 0.002995664 |
| 1837.679963 | 86.528137  | 1.95282E-06 | 0.003588657 |
| 1837.719963 | 94.309214  | 2.12843E-06 | 0.003911454 |
| 1837.759963 | 80.001768  | 1.80553E-06 | 0.003318128 |
| 1837.799963 | 64.117153  | 1.44703E-06 | 0.002659361 |
| 1837.839963 | 61.472934  | 1.38736E-06 | 0.002549743 |
| 1837.879963 | 63.462804  | 1.43227E-06 | 0.002632335 |
| 1837.919963 | 70.461694  | 1.59022E-06 | 0.002922701 |
| 1837.959963 | 74.506972  | 1.68152E-06 | 0.003090564 |
| 1837.999963 | 69.430938  | 1.56696E-06 | 0.002880072 |
| 1838.039963 | 62.125098  | 1.40208E-06 | 0.002577073 |
| 1838.079963 | 58.942249  | 1.33024E-06 | 0.002445096 |
| 1838.119963 | 64.629002  | 1.45859E-06 | 0.002681057 |
| 1838.159963 | 71.57666   | 1.61539E-06 | 0.002969337 |
| 1838.199963 | 87.185842  | 1.96766E-06 | 0.003616958 |
| 1838.239963 | 93.434971  | 2.1087E-06  | 0.003876291 |
| 1838.279963 | 90.912142  | 2.05176E-06 | 0.00377171  |
| 1838.319963 | 94.863371  | 2.14093E-06 | 0.003935722 |
| 1838.359963 | 103.757901 | 2.34167E-06 | 0.004304835 |
| 1838.399963 | 106.654821 | 2.40705E-06 | 0.004425122 |
| 1838.439963 | 108.404529 | 2.44654E-06 | 0.004497815 |
| 1838.479963 | 101.882926 | 2.29936E-06 | 0.004227319 |
| 1838.519963 | 95.574933  | 2.15699E-06 | 0.003965675 |
| 1838.559963 | 85.386975  | 1.92707E-06 | 0.003543025 |
| 1838.599963 | 82.754524  | 1.86765E-06 | 0.003433869 |
| 1838.639963 | 98.869166  | 2.23134E-06 | 0.00410263  |
| 1838.679963 | 94.849167  | 2.14061E-06 | 0.003935903 |
| 1838.719963 | 75.329663  | 1.70009E-06 | 0.003125981 |
| 1838.759963 | 61.757775  | 1.39379E-06 | 0.00256284  |
| 1838.799963 | 53.012666  | 1.19642E-06 | 0.002199981 |
| 1838.839963 | 58.19397   | 1.31336E-06 | 0.002415053 |
| 1838.879963 | 84.834788  | 1.9146E-06  | 0.003520725 |
| 1838.919963 | 93.729082  | 2.11533E-06 | 0.003889931 |
| 1838.959963 | 96.894153  | 2.18677E-06 | 0.004021375 |
| 1838.999963 | 93.595202  | 2.11231E-06 | 0.003884544 |
| 1839.039963 | 83.422056  | 1.88272E-06 | 0.003462397 |
| 1839.079963 | 88.937201  | 2.00719E-06 | 0.003691381 |
| 1839.119963 | 87.18876   | 1.96773E-06 | 0.003618889 |

|             |            |             |             |
|-------------|------------|-------------|-------------|
| 1839.159963 | 74.604326  | 1.68372E-06 | 0.003096623 |
| 1839.199963 | 78.615786  | 1.77425E-06 | 0.003263198 |
| 1839.239963 | 94.030951  | 2.12215E-06 | 0.003903139 |
| 1839.279963 | 97.73448   | 2.20573E-06 | 0.004056957 |
| 1839.319963 | 121.511176 | 2.74234E-06 | 0.005044037 |
| 1839.359963 | 137.103236 | 3.09423E-06 | 0.005691401 |
| 1839.399963 | 119.157246 | 2.68921E-06 | 0.004946538 |
| 1839.439963 | 100.42439  | 2.26644E-06 | 0.004168978 |
| 1839.479963 | 95.437839  | 2.1539E-06  | 0.003962054 |
| 1839.519963 | 104.189602 | 2.35141E-06 | 0.004325473 |
| 1839.559963 | 94.679174  | 2.13678E-06 | 0.00393073  |
| 1839.599963 | 85.627042  | 1.93248E-06 | 0.003554996 |
| 1839.639963 | 86.194021  | 1.94528E-06 | 0.003578613 |
| 1839.679963 | 84.443242  | 1.90577E-06 | 0.003506    |
| 1839.719963 | 81.959602  | 1.84971E-06 | 0.003402956 |
| 1839.759963 | 76.58612   | 1.72844E-06 | 0.003179918 |
| 1839.799963 | 72.734274  | 1.64151E-06 | 0.003020052 |
| 1839.839963 | 81.773279  | 1.84551E-06 | 0.003395441 |
| 1839.879963 | 93.779438  | 2.11647E-06 | 0.003894053 |
| 1839.919963 | 99.490308  | 2.24536E-06 | 0.004131278 |
| 1839.959963 | 110.860923 | 2.50198E-06 | 0.004603537 |
| 1839.999963 | 102.10634  | 2.3044E-06  | 0.004240092 |
| 1840.039963 | 95.202394  | 2.14859E-06 | 0.003953483 |
| 1840.079963 | 102.333347 | 2.30952E-06 | 0.004249704 |
| 1840.119963 | 95.239702  | 2.14943E-06 | 0.003955204 |
| 1840.159963 | 93.771182  | 2.11628E-06 | 0.003894303 |
| 1840.199963 | 94.141642  | 2.12465E-06 | 0.003909773 |
| 1840.239963 | 91.716115  | 2.0699E-06  | 0.003809122 |
| 1840.279963 | 87.27488   | 1.96967E-06 | 0.003624749 |
| 1840.319963 | 78.334258  | 1.7679E-06  | 0.003253493 |
| 1840.359963 | 78.192613  | 1.7647E-06  | 0.00324768  |
| 1840.399963 | 95.420844  | 2.15352E-06 | 0.00396333  |
| 1840.439963 | 105.447031 | 2.37979E-06 | 0.004379865 |
| 1840.479963 | 111.36662  | 2.51339E-06 | 0.004625843 |
| 1840.519963 | 108.811187 | 2.45572E-06 | 0.004519796 |
| 1840.559963 | 97.313595  | 2.19623E-06 | 0.004042297 |
| 1840.599963 | 74.179108  | 1.67412E-06 | 0.003081384 |
| 1840.639963 | 77.425298  | 1.74738E-06 | 0.0032163   |
| 1840.679963 | 103.10114  | 2.32685E-06 | 0.004282985 |
| 1840.719963 | 107.000781 | 2.41486E-06 | 0.004445078 |
| 1840.759963 | 83.798786  | 1.89122E-06 | 0.003481286 |
| 1840.799963 | 71.06805   | 1.60391E-06 | 0.002952472 |
| 1840.839963 | 65.276282  | 1.47319E-06 | 0.002711916 |
| 1840.879963 | 59.73037   | 1.34803E-06 | 0.002481564 |
| 1840.919963 | 65.549578  | 1.47936E-06 | 0.002723388 |
| 1840.959963 | 78.955378  | 1.78191E-06 | 0.00328043  |



|             |            |             |             |
|-------------|------------|-------------|-------------|
| 1840.999963 | 92.486301  | 2.08729E-06 | 0.003842695 |
| 1841.039963 | 80.509608  | 1.81699E-06 | 0.003345151 |
| 1841.079963 | 63.728573  | 1.43827E-06 | 0.002647961 |
| 1841.119963 | 55.821525  | 1.25981E-06 | 0.002319469 |
| 1841.159963 | 55.001046  | 1.2413E-06  | 0.002285426 |
| 1841.199963 | 63.877173  | 1.44162E-06 | 0.002654309 |
| 1841.239963 | 78.297426  | 1.76706E-06 | 0.003253589 |
| 1841.279963 | 83.086947  | 1.87516E-06 | 0.003452688 |
| 1841.319963 | 84.820718  | 1.91429E-06 | 0.003524812 |
| 1841.359963 | 83.888051  | 1.89324E-06 | 0.00348613  |
| 1841.399963 | 92.970617  | 2.09822E-06 | 0.003863657 |
| 1841.439963 | 95.607886  | 2.15774E-06 | 0.003973343 |
| 1841.479963 | 94.171492  | 2.12532E-06 | 0.003913733 |
| 1841.519963 | 96.978298  | 2.18867E-06 | 0.00403047  |
| 1841.559963 | 89.81344   | 2.02696E-06 | 0.003732776 |
| 1841.599963 | 75.357364  | 1.70071E-06 | 0.003132029 |
| 1841.639963 | 71.313628  | 1.60945E-06 | 0.002964026 |
| 1841.679963 | 82.306464  | 1.85754E-06 | 0.003420998 |
| 1841.719963 | 100.532568 | 2.26888E-06 | 0.004178642 |
| 1841.759963 | 107.919351 | 2.43559E-06 | 0.004485771 |
| 1841.799963 | 110.960224 | 2.50422E-06 | 0.004612268 |
| 1841.839963 | 118.952636 | 2.6846E-06  | 0.004944595 |
| 1841.879963 | 117.904871 | 2.66095E-06 | 0.004901148 |
| 1841.919963 | 97.790548  | 2.207E-06   | 0.004065111 |
| 1841.959963 | 87.535781  | 1.97556E-06 | 0.003638904 |
| 1841.999963 | 87.160583  | 1.96709E-06 | 0.003623385 |
| 1842.039963 | 96.230213  | 2.17178E-06 | 0.004000509 |
| 1842.079963 | 90.231584  | 2.0364E-06  | 0.003751214 |
| 1842.119963 | 84.779387  | 1.91335E-06 | 0.003524625 |
| 1842.159963 | 83.43601   | 1.88303E-06 | 0.003468851 |
| 1842.199963 | 84.871156  | 1.91542E-06 | 0.003528594 |
| 1842.239963 | 90.982293  | 2.05334E-06 | 0.003782752 |
| 1842.279963 | 86.670045  | 1.95602E-06 | 0.00360354  |
| 1842.319963 | 95.747281  | 2.16088E-06 | 0.003981037 |
| 1842.359963 | 98.85475   | 2.23101E-06 | 0.004110331 |
| 1842.399963 | 82.819885  | 1.86913E-06 | 0.003443684 |
| 1842.439963 | 79.369208  | 1.79125E-06 | 0.003300275 |
| 1842.479963 | 84.684054  | 1.9112E-06  | 0.00352135  |
| 1842.519963 | 84.960639  | 1.91744E-06 | 0.003532928 |
| 1842.559963 | 78.498598  | 1.7716E-06  | 0.003264287 |
| 1842.599963 | 73.537557  | 1.65964E-06 | 0.003058053 |
| 1842.639963 | 69.943618  | 1.57853E-06 | 0.002908663 |
| 1842.679963 | 74.149852  | 1.67346E-06 | 0.003083649 |
| 1842.719963 | 83.764064  | 1.89044E-06 | 0.003483548 |
| 1842.759963 | 86.162516  | 1.94457E-06 | 0.003583372 |
| 1842.799963 | 75.406889  | 1.70183E-06 | 0.003136129 |

|             |            |             |             |
|-------------|------------|-------------|-------------|
| 1842.839963 | 77.744877  | 1.75459E-06 | 0.003233435 |
| 1842.879963 | 84.745409  | 1.91259E-06 | 0.003524666 |
| 1842.919963 | 74.807905  | 1.68831E-06 | 0.003111421 |
| 1842.959963 | 67.802005  | 1.5302E-06  | 0.002820091 |
| 1842.999963 | 63.054603  | 1.42305E-06 | 0.00262269  |
| 1843.039963 | 65.260757  | 1.47284E-06 | 0.002714511 |
| 1843.079963 | 75.993475  | 1.71507E-06 | 0.003161005 |
| 1843.119963 | 92.160714  | 2.07994E-06 | 0.003833577 |
| 1843.159963 | 94.4126    | 2.13076E-06 | 0.003927333 |
| 1843.199963 | 93.677498  | 2.11417E-06 | 0.003896839 |
| 1843.239963 | 108.749349 | 2.45432E-06 | 0.004523903 |
| 1843.279963 | 106.413773 | 2.40161E-06 | 0.004426841 |
| 1843.319963 | 89.357841  | 2.01668E-06 | 0.00371739  |
| 1843.359963 | 75.082374  | 1.6945E-06  | 0.003123582 |
| 1843.399963 | 81.109469  | 1.83053E-06 | 0.003374395 |
| 1843.439963 | 95.95711   | 2.16562E-06 | 0.003992187 |
| 1843.479963 | 104.147143 | 2.35046E-06 | 0.004333018 |
| 1843.519963 | 91.697223  | 2.06948E-06 | 0.003815125 |
| 1843.559963 | 84.243171  | 1.90125E-06 | 0.00350507  |
| 1843.599963 | 89.314926  | 2.01571E-06 | 0.003716169 |
| 1843.639963 | 97.965132  | 2.21094E-06 | 0.004076171 |
| 1843.679963 | 93.409005  | 2.10811E-06 | 0.003886682 |
| 1843.719963 | 85.027471  | 1.91895E-06 | 0.003538009 |
| 1843.759963 | 85.611177  | 1.93213E-06 | 0.003562375 |
| 1843.799963 | 81.047979  | 1.82914E-06 | 0.003372568 |
| 1843.839963 | 66.706405  | 1.50547E-06 | 0.002775847 |
| 1843.879963 | 56.019217  | 1.26428E-06 | 0.002331173 |
| 1843.919963 | 57.708234  | 1.30239E-06 | 0.002401511 |
| 1843.959963 | 62.684052  | 1.41469E-06 | 0.002608635 |
| 1843.999963 | 64.267307  | 1.45042E-06 | 0.002674581 |
| 1844.039963 | 72.427289  | 1.63458E-06 | 0.003014236 |
| 1844.079963 | 101.357163 | 2.28749E-06 | 0.004218314 |
| 1844.119963 | 112.215591 | 2.53255E-06 | 0.004670325 |
| 1844.159963 | 89.77396   | 2.02607E-06 | 0.003736403 |
| 1844.199963 | 72.977293  | 1.647E-06   | 0.00303739  |
| 1844.239963 | 79.958941  | 1.80456E-06 | 0.003328045 |
| 1844.279963 | 93.030608  | 2.09957E-06 | 0.003872197 |
| 1844.319963 | 93.802166  | 2.11698E-06 | 0.003904396 |
| 1844.359963 | 83.363005  | 1.88139E-06 | 0.003469955 |
| 1844.399963 | 87.955906  | 1.98504E-06 | 0.003661212 |
| 1844.439963 | 90.301796  | 2.03799E-06 | 0.003758942 |
| 1844.479963 | 81.74289   | 1.84482E-06 | 0.003402739 |
| 1844.519963 | 90.733969  | 2.04774E-06 | 0.003777096 |
| 1844.559963 | 90.013947  | 2.03149E-06 | 0.003747204 |
| 1844.599963 | 71.705645  | 1.6183E-06  | 0.00298511  |
| 1844.639963 | 74.084843  | 1.67199E-06 | 0.003084223 |

|             |            |             |             |
|-------------|------------|-------------|-------------|
| 1844.679963 | 85.826559  | 1.93699E-06 | 0.003573119 |
| 1844.719963 | 76.41883   | 1.72467E-06 | 0.003181527 |
| 1844.759963 | 74.834943  | 1.68892E-06 | 0.003115653 |
| 1844.799963 | 68.977986  | 1.55674E-06 | 0.002871868 |
| 1844.839963 | 60.574651  | 1.36709E-06 | 0.002522054 |
| 1844.879963 | 67.651409  | 1.5268E-06  | 0.002816759 |
| 1844.919963 | 70.395486  | 1.58873E-06 | 0.002931076 |
| 1844.959963 | 68.566645  | 1.54745E-06 | 0.00285499  |
| 1844.999963 | 79.616419  | 1.79683E-06 | 0.003315154 |
| 1845.039963 | 77.611155  | 1.75158E-06 | 0.003231727 |
| 1845.079963 | 90.465895  | 2.04169E-06 | 0.00376708  |
| 1845.119963 | 94.978742  | 2.14354E-06 | 0.003955085 |
| 1845.159963 | 80.100074  | 1.80775E-06 | 0.003335583 |
| 1845.199963 | 84.547096  | 1.90811E-06 | 0.003520845 |
| 1845.239963 | 98.274255  | 2.21791E-06 | 0.004092582 |
| 1845.279963 | 98.459719  | 2.2221E-06  | 0.004100394 |
| 1845.319963 | 93.60084   | 2.11244E-06 | 0.003898129 |
| 1845.359963 | 90.915593  | 2.05184E-06 | 0.00378638  |
| 1845.399963 | 97.24596   | 2.19471E-06 | 0.00405011  |
| 1845.439963 | 104.094136 | 2.34926E-06 | 0.004335418 |
| 1845.479963 | 96.294232  | 2.17323E-06 | 0.004010646 |
| 1845.519963 | 68.268863  | 1.54073E-06 | 0.002843454 |
| 1845.559963 | 57.404479  | 1.29554E-06 | 0.002390995 |
| 1845.599963 | 69.019687  | 1.55768E-06 | 0.002874851 |
| 1845.639963 | 80.293245  | 1.81211E-06 | 0.003344497 |
| 1845.679963 | 73.38996   | 1.65631E-06 | 0.003057017 |
| 1845.719963 | 62.031564  | 1.39997E-06 | 0.002583945 |
| 1845.759963 | 52.678989  | 1.18889E-06 | 0.002194408 |
| 1845.799963 | 67.447251  | 1.52219E-06 | 0.002809659 |
| 1845.839963 | 84.492572  | 1.90688E-06 | 0.003519795 |
| 1845.879963 | 77.904324  | 1.75819E-06 | 0.003245412 |
| 1845.919963 | 85.65589   | 1.93313E-06 | 0.003568411 |
| 1845.959963 | 104.456236 | 2.35743E-06 | 0.004351725 |
| 1845.999963 | 107.017291 | 2.41523E-06 | 0.004458517 |
| 1846.039963 | 104.436579 | 2.35699E-06 | 0.004351094 |
| 1846.079963 | 87.468109  | 1.97403E-06 | 0.003644223 |
| 1846.119963 | 69.94303   | 1.57852E-06 | 0.002914131 |
| 1846.159963 | 67.232829  | 1.51735E-06 | 0.002801273 |
| 1846.199963 | 66.3433    | 1.49728E-06 | 0.002764271 |
| 1846.239963 | 69.328023  | 1.56464E-06 | 0.002888695 |
| 1846.279963 | 68.381997  | 1.54329E-06 | 0.002849339 |
| 1846.319963 | 60.524476  | 1.36595E-06 | 0.002521987 |
| 1846.359963 | 76.374786  | 1.72367E-06 | 0.00318252  |
| 1846.399963 | 88.759605  | 2.00318E-06 | 0.003698673 |
| 1846.439963 | 100.12352  | 2.25965E-06 | 0.004172305 |
| 1846.479963 | 111.582627 | 2.51826E-06 | 0.004649925 |

|             |            |             |             |
|-------------|------------|-------------|-------------|
| 1846.519963 | 99.242246  | 2.23976E-06 | 0.00413576  |
| 1846.559963 | 80.237062  | 1.81084E-06 | 0.003343822 |
| 1846.599963 | 82.642715  | 1.86513E-06 | 0.003444151 |
| 1846.639963 | 92.963155  | 2.09805E-06 | 0.003874341 |
| 1846.679963 | 90.334331  | 2.03872E-06 | 0.003764863 |
| 1846.719963 | 91.604812  | 2.06739E-06 | 0.003817896 |
| 1846.759963 | 84.905899  | 1.91621E-06 | 0.003538776 |
| 1846.799963 | 79.356331  | 1.79096E-06 | 0.003307548 |
| 1846.839963 | 75.144666  | 1.69591E-06 | 0.003132075 |
| 1846.879963 | 62.056506  | 1.40053E-06 | 0.002586609 |
| 1846.919963 | 73.026679  | 1.64811E-06 | 0.003043928 |
| 1846.959963 | 92.134122  | 2.07934E-06 | 0.003840456 |
| 1846.999963 | 99.940897  | 2.25553E-06 | 0.004165958 |
| 1847.039963 | 97.878167  | 2.20897E-06 | 0.004080063 |
| 1847.079963 | 89.421284  | 2.01811E-06 | 0.003727618 |
| 1847.119963 | 90.144441  | 2.03443E-06 | 0.003757845 |
| 1847.159963 | 89.253454  | 2.01433E-06 | 0.003720783 |
| 1847.199963 | 85.410497  | 1.9276E-06  | 0.003560655 |
| 1847.239963 | 90.336468  | 2.03877E-06 | 0.003766094 |
| 1847.279963 | 90.926599  | 2.05209E-06 | 0.003790779 |
| 1847.319963 | 85.544085  | 1.93061E-06 | 0.003566456 |
| 1847.359963 | 95.043468  | 2.145E-06   | 0.003962585 |
| 1847.399963 | 97.850077  | 2.20834E-06 | 0.004079687 |
| 1847.439963 | 91.11519   | 2.05634E-06 | 0.00379897  |
| 1847.479963 | 80.461284  | 1.8159E-06  | 0.003354837 |
| 1847.519963 | 80.659931  | 1.82038E-06 | 0.003363193 |
| 1847.559963 | 89.409604  | 2.01785E-06 | 0.003728099 |
| 1847.599963 | 85.017149  | 1.91872E-06 | 0.003545024 |
| 1847.639963 | 84.005854  | 1.8959E-06  | 0.003502932 |
| 1847.679963 | 89.816293  | 2.02703E-06 | 0.0037453   |
| 1847.719963 | 96.991203  | 2.18896E-06 | 0.004044578 |
| 1847.759963 | 102.468768 | 2.31258E-06 | 0.004273088 |
| 1847.799963 | 89.593262  | 2.022E-06   | 0.003736243 |
| 1847.839963 | 80.486831  | 1.81648E-06 | 0.003356556 |
| 1847.879963 | 88.603585  | 1.99966E-06 | 0.003695131 |
| 1847.919963 | 83.441535  | 1.88316E-06 | 0.003479928 |
| 1847.959963 | 70.545645  | 1.59212E-06 | 0.002942168 |
| 1847.999963 | 62.661522  | 1.41418E-06 | 0.002613411 |
| 1848.039963 | 68.966211  | 1.55647E-06 | 0.002876421 |
| 1848.079963 | 84.409691  | 1.90501E-06 | 0.003520609 |
| 1848.119963 | 100.675254 | 2.2721E-06  | 0.004199114 |
| 1848.159963 | 101.732421 | 2.29596E-06 | 0.0042433   |
| 1848.199963 | 96.256109  | 2.17237E-06 | 0.004014967 |
| 1848.239963 | 90.557702  | 2.04376E-06 | 0.003777361 |
| 1848.279963 | 91.648465  | 2.06838E-06 | 0.003822942 |
| 1848.319963 | 90.636685  | 2.04554E-06 | 0.003780819 |

|             |            |             |             |
|-------------|------------|-------------|-------------|
| 1848.359963 | 89.359467  | 2.01672E-06 | 0.003727622 |
| 1848.399963 | 97.938677  | 2.21034E-06 | 0.004085591 |
| 1848.439963 | 97.601317  | 2.20273E-06 | 0.004071606 |
| 1848.479963 | 96.585998  | 2.17981E-06 | 0.004029338 |
| 1848.519963 | 109.402766 | 2.46907E-06 | 0.004564122 |
| 1848.559963 | 104.69436  | 2.36281E-06 | 0.004367788 |
| 1848.599963 | 107.333571 | 2.42237E-06 | 0.004477992 |
| 1848.639963 | 113.41447  | 2.55961E-06 | 0.004731791 |
| 1848.679963 | 93.996788  | 2.12138E-06 | 0.003921746 |
| 1848.719963 | 82.602269  | 1.86422E-06 | 0.003446417 |
| 1848.759963 | 91.143184  | 2.05697E-06 | 0.003802852 |
| 1848.799963 | 91.818383  | 2.07221E-06 | 0.003831107 |
| 1848.839963 | 85.240359  | 1.92376E-06 | 0.003556717 |
| 1848.879963 | 79.315392  | 1.79004E-06 | 0.003309565 |
| 1848.919963 | 97.164934  | 2.19288E-06 | 0.004054454 |
| 1848.959963 | 104.104188 | 2.34949E-06 | 0.004344107 |
| 1848.999963 | 100.917286 | 2.27756E-06 | 0.004211213 |
| 1849.039963 | 91.629285  | 2.06795E-06 | 0.003823714 |
| 1849.079963 | 97.862359  | 2.20862E-06 | 0.00408391  |
| 1849.119963 | 110.819217 | 2.50104E-06 | 0.004624714 |
| 1849.159963 | 95.85933   | 2.16341E-06 | 0.004000494 |
| 1849.199963 | 85.658833  | 1.9332E-06  | 0.003574874 |
| 1849.239963 | 100.116964 | 2.2595E-06  | 0.004178358 |
| 1849.279963 | 99.45293   | 2.24451E-06 | 0.004150735 |
| 1849.319963 | 87.795736  | 1.98143E-06 | 0.003664293 |
| 1849.359963 | 92.427192  | 2.08595E-06 | 0.003857678 |
| 1849.399963 | 100.10069  | 2.25913E-06 | 0.004178041 |
| 1849.439963 | 94.997165  | 2.14395E-06 | 0.003965114 |
| 1849.479963 | 96.454345  | 2.17684E-06 | 0.004026022 |
| 1849.519963 | 101.557026 | 2.292E-06   | 0.004239101 |
| 1849.559963 | 100.547933 | 2.26923E-06 | 0.004197071 |
| 1849.599963 | 99.19886   | 2.23878E-06 | 0.004140848 |
| 1849.639963 | 94.108096  | 2.12389E-06 | 0.003928429 |
| 1849.679963 | 86.292177  | 1.94749E-06 | 0.003602241 |
| 1849.719963 | 91.252365  | 2.05944E-06 | 0.003809385 |
| 1849.759963 | 96.36968   | 2.17493E-06 | 0.004023097 |
| 1849.799963 | 98.135684  | 2.21479E-06 | 0.00409691  |
| 1849.839963 | 96.786337  | 2.18433E-06 | 0.004040666 |
| 1849.879963 | 84.235933  | 1.90109E-06 | 0.003516784 |
| 1849.919963 | 83.305397  | 1.88009E-06 | 0.00347801  |
| 1849.959963 | 87.283936  | 1.96988E-06 | 0.003644193 |
| 1849.999963 | 79.767086  | 1.80023E-06 | 0.003330429 |
| 1850.039963 | 76.184631  | 1.71938E-06 | 0.003180924 |
| 1850.079963 | 90.49142   | 2.04227E-06 | 0.003778354 |
| 1850.119963 | 94.60129   | 2.13502E-06 | 0.003950042 |
| 1850.159963 | 88.325063  | 1.99337E-06 | 0.00368806  |

|             |            |             |             |
|-------------|------------|-------------|-------------|
| 1850.199963 | 91.011013  | 2.05399E-06 | 0.003800296 |
| 1850.239963 | 84.718152  | 1.91197E-06 | 0.003537605 |
| 1850.279963 | 74.404056  | 1.6792E-06  | 0.003106983 |
| 1850.319963 | 84.577631  | 1.9088E-06  | 0.003531889 |
| 1850.359963 | 90.418229  | 2.04061E-06 | 0.003775869 |
| 1850.399963 | 94.856961  | 2.14079E-06 | 0.003961317 |
| 1850.439963 | 91.905056  | 2.07417E-06 | 0.003838125 |
| 1850.479963 | 83.499627  | 1.88447E-06 | 0.003487174 |
| 1850.519963 | 89.565268  | 2.02136E-06 | 0.003740573 |
| 1850.559963 | 100.271029 | 2.26298E-06 | 0.004187775 |
| 1850.599963 | 99.716618  | 2.25047E-06 | 0.004164711 |
| 1850.639963 | 91.096727  | 2.05593E-06 | 0.003804779 |
| 1850.679963 | 94.87116   | 2.14111E-06 | 0.003962509 |
| 1850.719963 | 97.576753  | 2.20217E-06 | 0.004075603 |
| 1850.759963 | 88.603818  | 1.99966E-06 | 0.003700899 |
| 1850.799963 | 80.430148  | 1.8152E-06  | 0.003359565 |
| 1850.839963 | 80.046643  | 1.80654E-06 | 0.003343619 |
| 1850.879963 | 67.156303  | 1.51562E-06 | 0.002805238 |
| 1850.919963 | 68.340711  | 1.54235E-06 | 0.002854775 |
| 1850.959963 | 81.843721  | 1.8471E-06  | 0.003418906 |
| 1850.999963 | 86.541365  | 1.95312E-06 | 0.003615221 |
| 1851.039963 | 94.785247  | 2.13917E-06 | 0.003959691 |
| 1851.079963 | 84.443146  | 1.90576E-06 | 0.003527722 |
| 1851.119963 | 81.998537  | 1.85059E-06 | 0.003425669 |
| 1851.159963 | 99.1948    | 2.23869E-06 | 0.00414417  |
| 1851.199963 | 122.343336 | 2.76112E-06 | 0.005111383 |
| 1851.239963 | 116.695223 | 2.63365E-06 | 0.004875516 |
| 1851.279963 | 99.104366  | 2.23665E-06 | 0.004140661 |
| 1851.319963 | 87.661236  | 1.97839E-06 | 0.003662637 |
| 1851.359963 | 96.033902  | 2.16735E-06 | 0.004012548 |
| 1851.399963 | 100.226378 | 2.26197E-06 | 0.004187811 |
| 1851.439963 | 86.552592  | 1.95337E-06 | 0.00361655  |
| 1851.479963 | 88.082108  | 1.98789E-06 | 0.003680539 |
| 1851.519963 | 97.835368  | 2.20801E-06 | 0.004088171 |
| 1851.559963 | 82.576017  | 1.86363E-06 | 0.003450615 |
| 1851.599963 | 65.197057  | 1.47141E-06 | 0.002724457 |
| 1851.639963 | 60.383659  | 1.36278E-06 | 0.002523369 |
| 1851.679963 | 68.77365   | 1.55213E-06 | 0.00287404  |
| 1851.719963 | 90.303379  | 2.03802E-06 | 0.003773845 |
| 1851.759963 | 94.897943  | 2.14171E-06 | 0.003965941 |
| 1851.799963 | 87.646156  | 1.97805E-06 | 0.003662956 |
| 1851.839963 | 85.511953  | 1.92989E-06 | 0.003573839 |
| 1851.879963 | 99.403382  | 2.2434E-06  | 0.0041545   |
| 1851.919963 | 106.280509 | 2.3986E-06  | 0.004442021 |
| 1851.959963 | 86.026687  | 1.9415E-06  | 0.003595585 |
| 1851.999963 | 80.7624    | 1.82269E-06 | 0.003375631 |

|             |            |             |             |
|-------------|------------|-------------|-------------|
| 1852.039963 | 86.733982  | 1.95747E-06 | 0.003625304 |
| 1852.079963 | 86.919267  | 1.96165E-06 | 0.003633127 |
| 1852.119963 | 82.47286   | 1.8613E-06  | 0.003447346 |
| 1852.159963 | 81.993057  | 1.85047E-06 | 0.003427365 |
| 1852.199963 | 92.114433  | 2.07889E-06 | 0.003850528 |
| 1852.239963 | 99.841792  | 2.25329E-06 | 0.004173634 |
| 1852.279963 | 93.024728  | 2.09944E-06 | 0.003888748 |
| 1852.319963 | 86.819013  | 1.95938E-06 | 0.003629406 |
| 1852.359963 | 101.857604 | 2.29878E-06 | 0.004258176 |
| 1852.399963 | 108.02017  | 2.43786E-06 | 0.004515901 |
| 1852.439963 | 102.932546 | 2.32304E-06 | 0.0043033   |
| 1852.479963 | 98.402662  | 2.22081E-06 | 0.004114008 |
| 1852.519963 | 91.717986  | 2.06995E-06 | 0.003834618 |
| 1852.559963 | 77.523166  | 1.74959E-06 | 0.00324122  |
| 1852.599963 | 64.594348  | 1.4578E-06  | 0.002700728 |
| 1852.639963 | 65.327343  | 1.47435E-06 | 0.002731434 |
| 1852.679963 | 66.575514  | 1.50252E-06 | 0.002783682 |
| 1852.719963 | 68.665707  | 1.54969E-06 | 0.00287114  |
| 1852.759963 | 75.505286  | 1.70405E-06 | 0.003157194 |
| 1852.799963 | 74.80771   | 1.68831E-06 | 0.003128093 |
| 1852.839963 | 71.391681  | 1.61121E-06 | 0.002985316 |
| 1852.879963 | 72.643876  | 1.63947E-06 | 0.003037743 |
| 1852.919963 | 77.070895  | 1.73938E-06 | 0.003222937 |
| 1852.959963 | 73.34291   | 1.65525E-06 | 0.003067107 |
| 1852.999963 | 58.787092  | 1.32674E-06 | 0.002458454 |
| 1853.039963 | 61.124163  | 1.37949E-06 | 0.002556245 |
| 1853.079963 | 79.620533  | 1.79692E-06 | 0.003329845 |
| 1853.119963 | 79.688901  | 1.79847E-06 | 0.003332776 |
| 1853.159963 | 86.379931  | 1.94947E-06 | 0.003612689 |
| 1853.199963 | 93.765045  | 2.11615E-06 | 0.003921643 |
| 1853.239963 | 92.02211   | 2.07681E-06 | 0.003848829 |
| 1853.279963 | 102.997763 | 2.32452E-06 | 0.004307979 |
| 1853.319963 | 102.141409 | 2.30519E-06 | 0.004272253 |
| 1853.359963 | 98.257897  | 2.21754E-06 | 0.004109907 |
| 1853.399963 | 109.303716 | 2.46683E-06 | 0.004572027 |
| 1853.439963 | 105.700698 | 2.38552E-06 | 0.004421414 |
| 1853.479963 | 92.565984  | 2.08909E-06 | 0.003872078 |
| 1853.519963 | 74.642246  | 1.68457E-06 | 0.003122387 |
| 1853.559963 | 70.823231  | 1.59838E-06 | 0.002962696 |
| 1853.599963 | 78.299641  | 1.76711E-06 | 0.003275522 |
| 1853.639963 | 81.858728  | 1.84744E-06 | 0.003424484 |
| 1853.679963 | 78.663908  | 1.77533E-06 | 0.003290903 |
| 1853.719963 | 73.873002  | 1.66721E-06 | 0.003090542 |
| 1853.759963 | 73.542268  | 1.65975E-06 | 0.003076772 |
| 1853.799963 | 77.269153  | 1.74386E-06 | 0.003232762 |
| 1853.839963 | 66.386022  | 1.49824E-06 | 0.002777497 |

|             |            |             |             |
|-------------|------------|-------------|-------------|
| 1853.879963 | 64.460372  | 1.45478E-06 | 0.002696989 |
| 1853.919963 | 66.894841  | 1.50972E-06 | 0.002798906 |
| 1853.959963 | 75.494048  | 1.7038E-06  | 0.003158769 |
| 1853.999963 | 73.733317  | 1.66406E-06 | 0.003085164 |
| 1854.039963 | 64.333206  | 1.45191E-06 | 0.002691901 |
| 1854.079963 | 64.514818  | 1.45601E-06 | 0.002699558 |
| 1854.119963 | 71.697319  | 1.61811E-06 | 0.003000168 |
| 1854.159963 | 86.09994   | 1.94316E-06 | 0.003602922 |
| 1854.199963 | 107.550001 | 2.42725E-06 | 0.004500614 |
| 1854.239963 | 119.696775 | 2.70139E-06 | 0.005009024 |
| 1854.279963 | 108.899444 | 2.45771E-06 | 0.00455728  |
| 1854.319963 | 101.372819 | 2.28784E-06 | 0.004242394 |
| 1854.359963 | 94.241847  | 2.12691E-06 | 0.003944052 |
| 1854.399963 | 105.047862 | 2.37078E-06 | 0.004396382 |
| 1854.439963 | 107.26144  | 2.42074E-06 | 0.004489119 |
| 1854.479963 | 96.367759  | 2.17489E-06 | 0.004033283 |
| 1854.519963 | 74.180496  | 1.67415E-06 | 0.003104745 |
| 1854.559963 | 70.887285  | 1.59983E-06 | 0.002966976 |
| 1854.599963 | 77.631147  | 1.75203E-06 | 0.003249309 |
| 1854.639963 | 73.587581  | 1.66077E-06 | 0.003080129 |
| 1854.679963 | 77.912563  | 1.75838E-06 | 0.003261228 |
| 1854.719963 | 83.243797  | 1.8787E-06  | 0.003484456 |
| 1854.759963 | 66.777938  | 1.50709E-06 | 0.002795281 |
| 1854.799963 | 60.117935  | 1.35678E-06 | 0.002516552 |
| 1854.839963 | 56.042714  | 1.26481E-06 | 0.002346013 |
| 1854.879963 | 60.488218  | 1.36513E-06 | 0.002532161 |
| 1854.919963 | 63.57119   | 1.43471E-06 | 0.002661278 |
| 1854.959963 | 81.368924  | 1.83638E-06 | 0.003406417 |
| 1854.999963 | 110.020091 | 2.483E-06   | 0.004605965 |
| 1855.039963 | 105.903699 | 2.3901E-06  | 0.004433729 |
| 1855.079963 | 81.644483  | 1.8426E-06  | 0.003418175 |
| 1855.119963 | 83.531615  | 1.88519E-06 | 0.003497258 |
| 1855.159963 | 89.219142  | 2.01355E-06 | 0.003735461 |
| 1855.199963 | 77.797806  | 1.75579E-06 | 0.003257338 |
| 1855.239963 | 78.971334  | 1.78227E-06 | 0.003306544 |
| 1855.279963 | 92.163718  | 2.08001E-06 | 0.003858995 |
| 1855.319963 | 86.230897  | 1.94611E-06 | 0.003610659 |
| 1855.359963 | 69.037941  | 1.55809E-06 | 0.002890818 |
| 1855.399963 | 69.423578  | 1.56679E-06 | 0.002907029 |
| 1855.439963 | 77.400779  | 1.74683E-06 | 0.003241134 |
| 1855.479963 | 85.216659  | 1.92322E-06 | 0.003568499 |
| 1855.519963 | 77.427814  | 1.74744E-06 | 0.003242406 |
| 1855.559963 | 85.104961  | 1.9207E-06  | 0.003563975 |
| 1855.599963 | 93.832682  | 2.11767E-06 | 0.003929554 |
| 1855.639963 | 85.619878  | 1.93232E-06 | 0.003585693 |
| 1855.679963 | 88.609335  | 1.99979E-06 | 0.003710969 |



|             |            |             |             |
|-------------|------------|-------------|-------------|
| 1855.719963 | 104.745516 | 2.36396E-06 | 0.004386849 |
| 1855.759963 | 110.494595 | 2.49371E-06 | 0.004627726 |
| 1855.799963 | 105.186745 | 2.37392E-06 | 0.004405518 |
| 1855.839963 | 83.843354  | 1.89223E-06 | 0.003511672 |
| 1855.879963 | 70.268989  | 1.58587E-06 | 0.00294319  |
| 1855.919963 | 74.039718  | 1.67097E-06 | 0.003101193 |
| 1855.959963 | 65.13166   | 1.46993E-06 | 0.002728133 |
| 1855.999963 | 53.496723  | 1.20735E-06 | 0.002240835 |
| 1856.039963 | 71.546563  | 1.61471E-06 | 0.002996959 |
| 1856.079963 | 98.888152  | 2.23177E-06 | 0.00414234  |
| 1856.119963 | 114.521268 | 2.58459E-06 | 0.004797301 |
| 1856.159963 | 107.751641 | 2.4318E-06  | 0.004513818 |
| 1856.199963 | 107.392986 | 2.42371E-06 | 0.004498891 |
| 1856.239963 | 104.918894 | 2.36787E-06 | 0.004395341 |
| 1856.279963 | 98.697762  | 2.22747E-06 | 0.00413481  |
| 1856.319963 | 93.617387  | 2.11281E-06 | 0.003922059 |
| 1856.359963 | 80.63543   | 1.81983E-06 | 0.003378258 |
| 1856.399963 | 69.174481  | 1.56117E-06 | 0.002898159 |
| 1856.439963 | 68.939181  | 1.55586E-06 | 0.002888363 |
| 1856.479963 | 91.076789  | 2.05548E-06 | 0.003815951 |
| 1856.519963 | 102.668954 | 2.3171E-06  | 0.004301734 |
| 1856.559963 | 88.689391  | 2.0016E-06  | 0.003716083 |
| 1856.599963 | 65.812413  | 1.48529E-06 | 0.002757598 |
| 1856.639963 | 54.538516  | 1.23086E-06 | 0.002285261 |
| 1856.679963 | 61.054153  | 1.37791E-06 | 0.002558333 |
| 1856.719963 | 92.659841  | 2.0912E-06  | 0.003882779 |
| 1856.759963 | 98.374319  | 2.22017E-06 | 0.004122325 |
| 1856.799963 | 88.555224  | 1.99857E-06 | 0.003710941 |
| 1856.839963 | 90.34512   | 2.03896E-06 | 0.003786029 |
| 1856.879963 | 91.665168  | 2.06876E-06 | 0.00384143  |
| 1856.919963 | 81.361134  | 1.83621E-06 | 0.00340969  |
| 1856.959963 | 78.100708  | 1.76262E-06 | 0.003273123 |
| 1856.999963 | 80.214884  | 1.81034E-06 | 0.003361798 |
| 1857.039963 | 77.613317  | 1.75162E-06 | 0.003252837 |
| 1857.079963 | 80.045172  | 1.80651E-06 | 0.00335483  |
| 1857.119963 | 72.501278  | 1.63625E-06 | 0.003038718 |
| 1857.159963 | 77.013221  | 1.73808E-06 | 0.003227895 |
| 1857.199963 | 92.63267   | 2.09059E-06 | 0.003882644 |
| 1857.239963 | 85.854113  | 1.93761E-06 | 0.003598603 |
| 1857.279963 | 72.287827  | 1.63144E-06 | 0.003030033 |
| 1857.319963 | 73.039496  | 1.6484E-06  | 0.003061606 |
| 1857.359963 | 79.679457  | 1.79825E-06 | 0.003340006 |
| 1857.399963 | 97.022922  | 2.18967E-06 | 0.004067097 |
| 1857.439963 | 97.706134  | 2.20509E-06 | 0.004095825 |
| 1857.479963 | 83.236479  | 1.87853E-06 | 0.003489334 |
| 1857.519963 | 76.425734  | 1.72482E-06 | 0.003203892 |

|             |            |             |             |
|-------------|------------|-------------|-------------|
| 1857.559963 | 68.512878  | 1.54624E-06 | 0.002872234 |
| 1857.599963 | 76.857849  | 1.73457E-06 | 0.003222146 |
| 1857.639963 | 89.96831   | 2.03046E-06 | 0.003771863 |
| 1857.679963 | 99.494163  | 2.24544E-06 | 0.004171318 |
| 1857.719963 | 104.823986 | 2.36573E-06 | 0.004394866 |
| 1857.759963 | 105.97522  | 2.39171E-06 | 0.004443229 |
| 1857.799963 | 98.368392  | 2.22004E-06 | 0.004124386 |
| 1857.839963 | 94.284803  | 2.12788E-06 | 0.003953254 |
| 1857.879963 | 83.867363  | 1.89277E-06 | 0.003516539 |
| 1857.919963 | 88.375088  | 1.9945E-06  | 0.003705626 |
| 1857.959963 | 89.949561  | 2.03004E-06 | 0.003771726 |
| 1857.999963 | 79.8385    | 1.80184E-06 | 0.003347826 |
| 1858.039963 | 80.162589  | 1.80916E-06 | 0.003361488 |
| 1858.079963 | 94.623086  | 2.13551E-06 | 0.003967951 |
| 1858.119963 | 102.330868 | 2.30947E-06 | 0.004291263 |
| 1858.159963 | 110.558955 | 2.49516E-06 | 0.004636409 |
| 1858.199963 | 102.163172 | 2.30568E-06 | 0.004284415 |
| 1858.239963 | 87.75147   | 1.98043E-06 | 0.003680111 |
| 1858.279963 | 89.969838  | 2.03049E-06 | 0.003773226 |
| 1858.319963 | 96.670618  | 2.18172E-06 | 0.004054336 |
| 1858.359963 | 92.792684  | 2.0942E-06  | 0.00389178  |
| 1858.399963 | 87.384251  | 1.97214E-06 | 0.003665026 |
| 1858.439963 | 74.630472  | 1.68431E-06 | 0.003130181 |
| 1858.479963 | 68.748965  | 1.55157E-06 | 0.002883559 |
| 1858.519963 | 70.293402  | 1.58642E-06 | 0.002948401 |
| 1858.559963 | 75.020484  | 1.69311E-06 | 0.003146742 |
| 1858.599963 | 63.819201  | 1.44031E-06 | 0.002676961 |
| 1858.639963 | 57.569024  | 1.29925E-06 | 0.002414843 |
| 1858.679963 | 68.168214  | 1.53846E-06 | 0.002859508 |
| 1858.719963 | 82.119868  | 1.85333E-06 | 0.003444823 |
| 1858.759963 | 82.871569  | 1.8703E-06  | 0.003476431 |
| 1858.799963 | 79.634877  | 1.79725E-06 | 0.003340725 |
| 1858.839963 | 69.864142  | 1.57674E-06 | 0.002930901 |
| 1858.879963 | 70.664128  | 1.59479E-06 | 0.002964525 |
| 1858.919963 | 81.706194  | 1.84399E-06 | 0.003427839 |
| 1858.959963 | 86.096591  | 1.94308E-06 | 0.003612108 |
| 1858.999963 | 85.448773  | 1.92846E-06 | 0.003585007 |
| 1859.039963 | 82.684128  | 1.86607E-06 | 0.003469091 |
| 1859.079963 | 73.297442  | 1.65422E-06 | 0.003075329 |
| 1859.119963 | 66.35452   | 1.49753E-06 | 0.002784086 |
| 1859.159963 | 77.704015  | 1.75367E-06 | 0.003260356 |
| 1859.199963 | 96.455464  | 2.17687E-06 | 0.004047228 |
| 1859.239963 | 89.459913  | 2.01899E-06 | 0.003753779 |
| 1859.279963 | 83.854796  | 1.89249E-06 | 0.003518661 |
| 1859.319963 | 86.781101  | 1.95853E-06 | 0.003641531 |
| 1859.359963 | 100.613042 | 2.2707E-06  | 0.004222042 |

|             |            |             |             |
|-------------|------------|-------------|-------------|
| 1859.399963 | 112.899287 | 2.54798E-06 | 0.004737713 |
| 1859.439963 | 104.273713 | 2.35331E-06 | 0.004375843 |
| 1859.479963 | 84.157246  | 1.89931E-06 | 0.003531732 |
| 1859.519963 | 59.389809  | 1.34035E-06 | 0.002492399 |
| 1859.559963 | 62.386679  | 1.40798E-06 | 0.002618224 |
| 1859.599963 | 76.317208  | 1.72237E-06 | 0.003202925 |
| 1859.639963 | 81.579768  | 1.84114E-06 | 0.003423861 |
| 1859.679963 | 79.59763   | 1.79641E-06 | 0.003340743 |
| 1859.719963 | 73.097246  | 1.6497E-06  | 0.003067986 |
| 1859.759963 | 88.318358  | 1.99322E-06 | 0.003706915 |
| 1859.799963 | 95.419595  | 2.15349E-06 | 0.004005056 |
| 1859.839963 | 82.099656  | 1.85287E-06 | 0.003446051 |
| 1859.879963 | 67.750699  | 1.52904E-06 | 0.002843829 |
| 1859.919963 | 68.35022   | 1.54257E-06 | 0.002869055 |
| 1859.959963 | 82.025998  | 1.85121E-06 | 0.003443181 |
| 1859.999963 | 81.00108   | 1.82808E-06 | 0.003400232 |
| 1860.039963 | 72.972402  | 1.64689E-06 | 0.003063273 |
| 1860.079963 | 83.180662  | 1.87727E-06 | 0.003491875 |
| 1860.119963 | 86.019586  | 1.94134E-06 | 0.003611129 |
| 1860.159963 | 80.68611   | 1.82097E-06 | 0.003387301 |
| 1860.199963 | 79.081931  | 1.78477E-06 | 0.003320027 |
| 1860.239963 | 86.591534  | 1.95425E-06 | 0.003635375 |
| 1860.279963 | 93.1316    | 2.10185E-06 | 0.00391003  |
| 1860.319963 | 87.426098  | 1.97309E-06 | 0.00367057  |
| 1860.359963 | 98.278963  | 2.21802E-06 | 0.004126314 |
| 1860.399963 | 96.758062  | 2.18369E-06 | 0.004062546 |
| 1860.439963 | 74.646491  | 1.68467E-06 | 0.003134222 |
| 1860.479963 | 69.734327  | 1.57381E-06 | 0.002928036 |
| 1860.519963 | 78.979208  | 1.78245E-06 | 0.003316285 |
| 1860.559963 | 84.405554  | 1.90492E-06 | 0.00354421  |
| 1860.599963 | 87.746903  | 1.98033E-06 | 0.003684593 |
| 1860.639963 | 81.798174  | 1.84607E-06 | 0.003434873 |
| 1860.679963 | 69.120361  | 1.55995E-06 | 0.002902568 |
| 1860.719963 | 77.632197  | 1.75205E-06 | 0.003260075 |
| 1860.759963 | 90.953507  | 2.05269E-06 | 0.003819571 |
| 1860.799963 | 102.525289 | 2.31385E-06 | 0.004305618 |
| 1860.839963 | 99.282851  | 2.24068E-06 | 0.004169539 |
| 1860.879963 | 98.458712  | 2.22208E-06 | 0.004135017 |
| 1860.919963 | 94.185508  | 2.12564E-06 | 0.003955638 |
| 1860.959963 | 83.430722  | 1.88292E-06 | 0.00350403  |
| 1860.999963 | 87.327267  | 1.97085E-06 | 0.003667761 |
| 1861.039963 | 88.128101  | 1.98893E-06 | 0.003701475 |
| 1861.079963 | 92.342363  | 2.08404E-06 | 0.003878562 |
| 1861.119963 | 87.805378  | 1.98165E-06 | 0.003688079 |
| 1861.159963 | 82.408368  | 1.85984E-06 | 0.003461464 |
| 1861.199963 | 72.489712  | 1.63599E-06 | 0.003044908 |

|             |            |             |             |
|-------------|------------|-------------|-------------|
| 1861.239963 | 69.314536  | 1.56433E-06 | 0.002911598 |
| 1861.279963 | 88.744944  | 2.00285E-06 | 0.003727864 |
| 1861.319963 | 90.710417  | 2.04721E-06 | 0.003810509 |
| 1861.359963 | 76.212477  | 1.72001E-06 | 0.003201557 |
| 1861.399963 | 74.10175   | 1.67237E-06 | 0.003112956 |
| 1861.439963 | 82.03674   | 1.85145E-06 | 0.003446372 |
| 1861.479963 | 88.427316  | 1.99568E-06 | 0.003714921 |
| 1861.519963 | 100.347384 | 2.2647E-06  | 0.004215786 |
| 1861.559963 | 95.313739  | 2.1511E-06  | 0.004004399 |
| 1861.599963 | 82.94587   | 1.87197E-06 | 0.003484864 |
| 1861.639963 | 93.671765  | 2.11404E-06 | 0.003935584 |
| 1861.679963 | 104.243717 | 2.35264E-06 | 0.004379854 |
| 1861.719963 | 103.820555 | 2.34309E-06 | 0.004362169 |
| 1861.759963 | 92.415029  | 2.08568E-06 | 0.003883033 |
| 1861.799963 | 85.505651  | 1.92974E-06 | 0.003592796 |
| 1861.839963 | 74.260314  | 1.67595E-06 | 0.003120354 |
| 1861.879963 | 66.431669  | 1.49927E-06 | 0.002791461 |
| 1861.919963 | 69.611242  | 1.57103E-06 | 0.00292513  |
| 1861.959963 | 85.995333  | 1.94079E-06 | 0.003613682 |
| 1861.999963 | 93.671386  | 2.11403E-06 | 0.003936329 |
| 1862.039963 | 98.806688  | 2.22993E-06 | 0.004152218 |
| 1862.079963 | 107.116807 | 2.41748E-06 | 0.004501536 |
| 1862.119963 | 101.758629 | 2.29655E-06 | 0.004276453 |
| 1862.159963 | 86.822183  | 1.95946E-06 | 0.00364882  |
| 1862.199963 | 75.017739  | 1.69305E-06 | 0.00315279  |
| 1862.239963 | 66.585092  | 1.50273E-06 | 0.002798449 |
| 1862.279963 | 64.043658  | 1.44538E-06 | 0.002691695 |
| 1862.319963 | 79.156193  | 1.78645E-06 | 0.003326932 |
| 1862.359963 | 103.22952  | 2.32975E-06 | 0.004338827 |
| 1862.399963 | 98.465218  | 2.22222E-06 | 0.004138668 |
| 1862.439963 | 86.40519   | 1.95004E-06 | 0.003631841 |
| 1862.479963 | 78.232965  | 1.76561E-06 | 0.003288411 |
| 1862.519963 | 77.360559  | 1.74592E-06 | 0.003251811 |
| 1862.559963 | 90.399125  | 2.04018E-06 | 0.003799962 |
| 1862.599963 | 88.194072  | 1.99042E-06 | 0.003707351 |
| 1862.639963 | 72.652688  | 1.63967E-06 | 0.003054115 |
| 1862.679963 | 65.788822  | 1.48476E-06 | 0.002765637 |
| 1862.719963 | 58.475895  | 1.31972E-06 | 0.002458268 |
| 1862.759963 | 69.121443  | 1.55997E-06 | 0.002905858 |
| 1862.799963 | 73.224021  | 1.65256E-06 | 0.003078396 |
| 1862.839963 | 76.113665  | 1.71778E-06 | 0.003199948 |
| 1862.879963 | 79.761276  | 1.8001E-06  | 0.003353372 |
| 1862.919963 | 91.710885  | 2.06979E-06 | 0.003855847 |
| 1862.959963 | 101.165524 | 2.28316E-06 | 0.004253445 |
| 1862.999963 | 100.7143   | 2.27298E-06 | 0.004234564 |
| 1863.039963 | 91.065176  | 2.05521E-06 | 0.003828946 |

|             |            |             |             |
|-------------|------------|-------------|-------------|
| 1863.079963 | 87.250907  | 1.96913E-06 | 0.003668649 |
| 1863.119963 | 90.676585  | 2.04644E-06 | 0.003812771 |
| 1863.159963 | 105.981394 | 2.39185E-06 | 0.004456404 |
| 1863.199963 | 98.5318    | 2.22373E-06 | 0.004143245 |
| 1863.239963 | 98.774948  | 2.22921E-06 | 0.004153559 |
| 1863.279963 | 95.536376  | 2.15612E-06 | 0.004017461 |
| 1863.319963 | 83.38963   | 1.88199E-06 | 0.003506745 |
| 1863.359963 | 88.199615  | 1.99054E-06 | 0.003709097 |
| 1863.399963 | 94.038872  | 2.12233E-06 | 0.003954743 |
| 1863.439963 | 82.905015  | 1.87105E-06 | 0.003486591 |
| 1863.479963 | 74.870996  | 1.68973E-06 | 0.003148786 |
| 1863.519963 | 71.643904  | 1.6169E-06  | 0.003013131 |
| 1863.559963 | 81.630817  | 1.84229E-06 | 0.003433225 |
| 1863.599963 | 84.701279  | 1.91159E-06 | 0.003562439 |
| 1863.639963 | 81.630009  | 1.84228E-06 | 0.003433338 |
| 1863.679963 | 84.957808  | 1.91738E-06 | 0.003573382 |
| 1863.719963 | 87.027885  | 1.9641E-06  | 0.003660529 |
| 1863.759963 | 91.049468  | 2.05486E-06 | 0.003829765 |
| 1863.799963 | 77.48281   | 1.74868E-06 | 0.003259188 |
| 1863.839963 | 66.940489  | 1.51075E-06 | 0.002815803 |
| 1863.879963 | 77.039822  | 1.73868E-06 | 0.003240694 |
| 1863.919963 | 86.222109  | 1.94591E-06 | 0.003627026 |
| 1863.959963 | 79.390934  | 1.79174E-06 | 0.003339737 |
| 1863.999963 | 75.806476  | 1.71085E-06 | 0.003189018 |
| 1864.039963 | 77.400991  | 1.74683E-06 | 0.003256166 |
| 1864.079963 | 91.679859  | 2.06909E-06 | 0.003856943 |
| 1864.119963 | 101.278343 | 2.28571E-06 | 0.00426084  |
| 1864.159963 | 106.388802 | 2.40105E-06 | 0.004475936 |
| 1864.199963 | 100.000357 | 2.25687E-06 | 0.004207255 |
| 1864.239963 | 105.521883 | 2.38148E-06 | 0.004439654 |
| 1864.279963 | 121.660909 | 2.74572E-06 | 0.005118786 |
| 1864.319963 | 135.050245 | 3.0479E-06  | 0.005682253 |
| 1864.359963 | 134.28346  | 3.03059E-06 | 0.005650112 |
| 1864.399963 | 122.29669  | 2.76007E-06 | 0.005145867 |
| 1864.439963 | 92.704478  | 2.09221E-06 | 0.003900802 |
| 1864.479963 | 75.509701  | 1.70415E-06 | 0.003177351 |
| 1864.519963 | 74.699852  | 1.68587E-06 | 0.003143341 |
| 1864.559963 | 78.238963  | 1.76574E-06 | 0.003292336 |
| 1864.599963 | 71.452315  | 1.61258E-06 | 0.003006815 |
| 1864.639963 | 80.618699  | 1.81945E-06 | 0.003392622 |
| 1864.679963 | 87.608486  | 1.9772E-06  | 0.003686848 |
| 1864.719963 | 79.39082   | 1.79174E-06 | 0.003341094 |
| 1864.759963 | 72.419743  | 1.63441E-06 | 0.003047787 |
| 1864.799963 | 79.923657  | 1.80377E-06 | 0.003363662 |
| 1864.839963 | 84.434754  | 1.90557E-06 | 0.003553592 |
| 1864.879963 | 92.073206  | 2.07796E-06 | 0.003875153 |

|             |           |             |             |
|-------------|-----------|-------------|-------------|
| 1864.919963 | 87.655521 | 1.97826E-06 | 0.003689302 |
| 1864.959963 | 75.386274 | 1.70136E-06 | 0.003172974 |
| 1864.999963 | 79.996908 | 1.80542E-06 | 0.003367106 |
| 1865.039963 | 87.648686 | 1.97811E-06 | 0.003689252 |
| 1865.079963 | 95.274567 | 2.15021E-06 | 0.004010322 |
| 1865.119963 | 99.924888 | 2.25517E-06 | 0.004206154 |
| 1865.159963 | 94.170091 | 2.12529E-06 | 0.003964002 |
| 1865.199963 | 87.216847 | 1.96836E-06 | 0.00367139  |
| 1865.239963 | 80.788146 | 1.82328E-06 | 0.003400847 |
| 1865.279963 | 70.062063 | 1.5812E-06  | 0.002949387 |
| 1865.319963 | 73.912999 | 1.66811E-06 | 0.003111565 |
| 1865.359963 | 79.278326 | 1.7892E-06  | 0.003337505 |
| 1865.399963 | 84.11901  | 1.89845E-06 | 0.003541366 |
| 1865.439963 | 93.01775  | 2.09928E-06 | 0.003916083 |
| 1865.479963 | 84.998131 | 1.91829E-06 | 0.00357853  |
| 1865.519963 | 75.810118 | 1.71093E-06 | 0.003191772 |
| 1865.559963 | 57.313864 | 1.29349E-06 | 0.002413091 |
| 1865.599963 | 46.770951 | 1.05556E-06 | 0.001969244 |
| 1865.639963 | 55.863915 | 1.26077E-06 | 0.002352144 |
| 1865.679963 | 64.631442 | 1.45864E-06 | 0.002721358 |
| 1865.719963 | 73.170297 | 1.65135E-06 | 0.00308096  |
| 1865.759963 | 76.189786 | 1.7195E-06  | 0.003208169 |
| 1865.799963 | 82.631639 | 1.86488E-06 | 0.003479495 |
| 1865.839963 | 95.366084 | 2.15228E-06 | 0.004015809 |
| 1865.879963 | 86.717085 | 1.95708E-06 | 0.003651683 |
| 1865.919963 | 67.137763 | 1.51521E-06 | 0.002827253 |
| 1865.959963 | 60.400033 | 1.36314E-06 | 0.002543573 |
| 1865.999963 | 79.651755 | 1.79763E-06 | 0.003354376 |
| 1866.039963 | 83.355809 | 1.88122E-06 | 0.00351044  |
| 1866.079963 | 69.639626 | 1.57167E-06 | 0.002932861 |
| 1866.119963 | 66.925214 | 1.51041E-06 | 0.002818604 |
| 1866.159963 | 83.734282 | 1.88977E-06 | 0.003526606 |
| 1866.199963 | 102.15792 | 2.30556E-06 | 0.00430264  |
| 1866.239963 | 97.158581 | 2.19273E-06 | 0.004092168 |
| 1866.279963 | 84.834455 | 1.9146E-06  | 0.003573171 |
| 1866.319963 | 80.376801 | 1.81399E-06 | 0.00338549  |
| 1866.359963 | 85.508229 | 1.9298E-06  | 0.003601704 |
| 1866.399963 | 91.677354 | 2.06903E-06 | 0.003861638 |
| 1866.439963 | 83.797957 | 1.8912E-06  | 0.003529817 |
| 1866.479963 | 72.430787 | 1.63466E-06 | 0.003051064 |
| 1866.519963 | 71.891779 | 1.6225E-06  | 0.003028424 |
| 1866.559963 | 62.805031 | 1.41742E-06 | 0.002645703 |
| 1866.599963 | 57.351584 | 1.29435E-06 | 0.002416025 |
| 1866.639963 | 64.515728 | 1.45603E-06 | 0.002717884 |
| 1866.679963 | 78.128008 | 1.76324E-06 | 0.003291405 |
| 1866.719963 | 86.112409 | 1.94344E-06 | 0.003627853 |

|             |            |             |             |
|-------------|------------|-------------|-------------|
| 1866.759963 | 103.767861 | 2.3419E-06  | 0.004371758 |
| 1866.799963 | 99.886805  | 2.25431E-06 | 0.004208338 |
| 1866.839963 | 86.370915  | 1.94927E-06 | 0.003638977 |
| 1866.879963 | 82.617293  | 1.86456E-06 | 0.003480905 |
| 1866.919963 | 80.723915  | 1.82183E-06 | 0.003401204 |
| 1866.959963 | 69.573731  | 1.57018E-06 | 0.002931467 |
| 1866.999963 | 65.283534  | 1.47336E-06 | 0.00275076  |
| 1867.039963 | 72.407341  | 1.63413E-06 | 0.003050991 |
| 1867.079963 | 85.410763  | 1.9276E-06  | 0.003598987 |
| 1867.119963 | 94.883889  | 2.1414E-06  | 0.003998245 |
| 1867.159963 | 110.719757 | 2.49879E-06 | 0.004665642 |
| 1867.199963 | 101.25751  | 2.28524E-06 | 0.004267002 |
| 1867.239963 | 82.233166  | 1.85589E-06 | 0.003465388 |
| 1867.279963 | 67.203064  | 1.51668E-06 | 0.002832065 |
| 1867.319963 | 64.76422   | 1.46164E-06 | 0.002729346 |
| 1867.359963 | 76.837325  | 1.73411E-06 | 0.00323821  |
| 1867.399963 | 73.325036  | 1.65484E-06 | 0.003090255 |
| 1867.439963 | 63.009487  | 1.42204E-06 | 0.002655568 |
| 1867.479963 | 57.256501  | 1.2922E-06  | 0.002413157 |
| 1867.519963 | 69.387187  | 1.56597E-06 | 0.002924484 |
| 1867.559963 | 85.594639  | 1.93175E-06 | 0.003607662 |
| 1867.599963 | 75.839584  | 1.71159E-06 | 0.003196572 |
| 1867.639963 | 64.408524  | 1.45361E-06 | 0.002714821 |
| 1867.679963 | 61.758379  | 1.3938E-06  | 0.002603173 |
| 1867.719963 | 56.593391  | 1.27723E-06 | 0.002385515 |
| 1867.759963 | 62.370579  | 1.40762E-06 | 0.002629091 |
| 1867.799963 | 73.941596  | 1.66876E-06 | 0.003116908 |
| 1867.839963 | 75.201827  | 1.6972E-06  | 0.003170099 |
| 1867.879963 | 78.882664  | 1.78027E-06 | 0.003325334 |
| 1867.919963 | 72.540672  | 1.63714E-06 | 0.00305805  |
| 1867.959963 | 61.222051  | 1.3817E-06  | 0.002580954 |
| 1867.999963 | 61.685367  | 1.39215E-06 | 0.002600541 |
| 1868.039963 | 75.019083  | 1.69308E-06 | 0.003162734 |
| 1868.079963 | 73.353628  | 1.65549E-06 | 0.003092586 |
| 1868.119963 | 83.862542  | 1.89266E-06 | 0.003535717 |
| 1868.159963 | 102.536627 | 2.31411E-06 | 0.004323126 |
| 1868.199963 | 118.324058 | 2.67041E-06 | 0.004988858 |
| 1868.239963 | 110.589066 | 2.49584E-06 | 0.00466283  |
| 1868.279963 | 105.298925 | 2.37645E-06 | 0.004439874 |
| 1868.319963 | 109.534795 | 2.47205E-06 | 0.004618576 |
| 1868.359963 | 94.152745  | 2.1249E-06  | 0.003970071 |
| 1868.399963 | 79.92554   | 1.80381E-06 | 0.003370235 |
| 1868.439963 | 86.14206   | 1.94411E-06 | 0.003632446 |
| 1868.479963 | 89.073033  | 2.01025E-06 | 0.00375612  |
| 1868.519963 | 78.372873  | 1.76877E-06 | 0.003304976 |
| 1868.559963 | 76.185477  | 1.7194E-06  | 0.003212802 |

|             |            |             |             |
|-------------|------------|-------------|-------------|
| 1868.599963 | 66.932687  | 1.51058E-06 | 0.002822665 |
| 1868.639963 | 70.1765    | 1.58379E-06 | 0.002959526 |
| 1868.679963 | 85.045781  | 1.91936E-06 | 0.003586679 |
| 1868.719963 | 94.4765    | 2.1322E-06  | 0.00398449  |
| 1868.759963 | 88.579859  | 1.99912E-06 | 0.003735883 |
| 1868.799963 | 75.050268  | 1.69378E-06 | 0.003165336 |
| 1868.839963 | 63.097991  | 1.42403E-06 | 0.002661291 |
| 1868.879963 | 67.613662  | 1.52595E-06 | 0.00285181  |
| 1868.919963 | 81.422577  | 1.83759E-06 | 0.003434316 |
| 1868.959963 | 78.880362  | 1.78022E-06 | 0.00332716  |
| 1868.999963 | 71.359244  | 1.61048E-06 | 0.003009985 |
| 1869.039963 | 72.891426  | 1.64506E-06 | 0.003074679 |
| 1869.079963 | 73.041583  | 1.64845E-06 | 0.003081079 |
| 1869.119963 | 68.575789  | 1.54766E-06 | 0.002892762 |
| 1869.159963 | 65.066577  | 1.46846E-06 | 0.00274479  |
| 1869.199963 | 61.41808   | 1.38612E-06 | 0.002590936 |
| 1869.239963 | 59.184023  | 1.3357E-06  | 0.002496746 |
| 1869.279963 | 72.094422  | 1.62707E-06 | 0.003041451 |
| 1869.319963 | 83.992734  | 1.8956E-06  | 0.003543481 |
| 1869.359963 | 90.292011  | 2.03776E-06 | 0.003809316 |
| 1869.399963 | 92.203786  | 2.08091E-06 | 0.003890055 |
| 1869.439963 | 83.782544  | 1.89086E-06 | 0.00353484  |
| 1869.479963 | 73.865448  | 1.66704E-06 | 0.003116498 |
| 1869.519963 | 70.414111  | 1.58915E-06 | 0.002970945 |
| 1869.559963 | 75.32566   | 1.7E-06     | 0.003178243 |
| 1869.599963 | 77.404738  | 1.74692E-06 | 0.003266036 |
| 1869.639963 | 79.981696  | 1.80508E-06 | 0.003374841 |
| 1869.679963 | 84.403458  | 1.90487E-06 | 0.003561494 |
| 1869.719963 | 90.710594  | 2.04721E-06 | 0.003827713 |
| 1869.759963 | 92.605977  | 2.08999E-06 | 0.003907776 |
| 1869.799963 | 82.820192  | 1.86914E-06 | 0.003494911 |
| 1869.839963 | 79.721896  | 1.79921E-06 | 0.003364239 |
| 1869.879963 | 79.004594  | 1.78302E-06 | 0.00333404  |
| 1869.919963 | 82.466748  | 1.86116E-06 | 0.00348022  |
| 1869.959963 | 74.717317  | 1.68627E-06 | 0.003153249 |
| 1869.999963 | 67.103764  | 1.51444E-06 | 0.002832    |
| 1870.039963 | 64.893829  | 1.46456E-06 | 0.002738792 |
| 1870.079963 | 64.388901  | 1.45317E-06 | 0.00271754  |
| 1870.119963 | 58.631045  | 1.32322E-06 | 0.002474582 |
| 1870.159963 | 72.656116  | 1.63975E-06 | 0.00306659  |
| 1870.199963 | 97.71229   | 2.20523E-06 | 0.004124222 |
| 1870.239963 | 106.130698 | 2.39522E-06 | 0.00447964  |
| 1870.279963 | 107.291422 | 2.42142E-06 | 0.004528729 |
| 1870.319963 | 93.642678  | 2.11338E-06 | 0.003952706 |
| 1870.359963 | 84.274552  | 1.90196E-06 | 0.003557348 |
| 1870.399963 | 77.826497  | 1.75644E-06 | 0.003285237 |



|             |            |             |             |
|-------------|------------|-------------|-------------|
| 1870.439963 | 81.688417  | 1.84359E-06 | 0.003448331 |
| 1870.479963 | 88.364519  | 1.99426E-06 | 0.003730231 |
| 1870.519963 | 88.713015  | 2.00213E-06 | 0.003745023 |
| 1870.559963 | 92.431209  | 2.08604E-06 | 0.00390207  |
| 1870.599963 | 95.294696  | 2.15067E-06 | 0.004023041 |
| 1870.639963 | 85.678473  | 1.93364E-06 | 0.003617151 |
| 1870.679963 | 79.093245  | 1.78502E-06 | 0.003339209 |
| 1870.719963 | 75.755762  | 1.7097E-06  | 0.003198374 |
| 1870.759963 | 79.83316   | 1.80172E-06 | 0.003370592 |
| 1870.799963 | 85.152396  | 1.92177E-06 | 0.003595249 |
| 1870.839963 | 88.956583  | 2.00763E-06 | 0.003755947 |
| 1870.879963 | 93.992436  | 2.12128E-06 | 0.003968657 |
| 1870.919963 | 91.165438  | 2.05748E-06 | 0.003849375 |
| 1870.959963 | 83.396177  | 1.88214E-06 | 0.0035214   |
| 1870.999963 | 70.750383  | 1.59674E-06 | 0.002987496 |
| 1871.039963 | 81.559311  | 1.84068E-06 | 0.003443986 |
| 1871.079963 | 90.212909  | 2.03598E-06 | 0.003809481 |
| 1871.119963 | 81.997311  | 1.85057E-06 | 0.003462629 |
| 1871.159963 | 90.294754  | 2.03783E-06 | 0.0038131   |
| 1871.199963 | 89.03758   | 2.00945E-06 | 0.003760091 |
| 1871.239963 | 79.967449  | 1.80475E-06 | 0.003377128 |
| 1871.279963 | 99.13125   | 2.23725E-06 | 0.004186529 |
| 1871.319963 | 106.498453 | 2.40352E-06 | 0.004497758 |
| 1871.359963 | 96.148211  | 2.16993E-06 | 0.004060722 |
| 1871.399963 | 94.513775  | 2.13304E-06 | 0.003991779 |
| 1871.439963 | 88.732441  | 2.00257E-06 | 0.003747685 |
| 1871.479963 | 90.032094  | 2.0319E-06  | 0.003802658 |
| 1871.519963 | 91.774734  | 2.07123E-06 | 0.003876344 |
| 1871.559963 | 89.767088  | 2.02592E-06 | 0.003791627 |
| 1871.599963 | 89.150284  | 2.012E-06   | 0.003765655 |
| 1871.639963 | 91.66233   | 2.06869E-06 | 0.003871845 |
| 1871.679963 | 98.497648  | 2.22295E-06 | 0.00416066  |
| 1871.719963 | 101.849375 | 2.2986E-06  | 0.004302333 |
| 1871.759963 | 88.628773  | 2.00023E-06 | 0.003743947 |
| 1871.799963 | 81.418865  | 1.83751E-06 | 0.003439452 |
| 1871.839963 | 83.113925  | 1.87577E-06 | 0.003511133 |
| 1871.879963 | 82.425052  | 1.86022E-06 | 0.003482106 |
| 1871.919963 | 75.190696  | 1.69695E-06 | 0.003176553 |
| 1871.959963 | 79.237289  | 1.78828E-06 | 0.00334758  |
| 1871.999963 | 80.116149  | 1.80811E-06 | 0.003384782 |
| 1872.039963 | 83.318878  | 1.88039E-06 | 0.003520167 |
| 1872.079963 | 75.581768  | 1.70578E-06 | 0.003193348 |
| 1872.119963 | 65.477856  | 1.47774E-06 | 0.002766514 |
| 1872.159963 | 66.789845  | 1.50735E-06 | 0.002822007 |
| 1872.199963 | 78.816572  | 1.77878E-06 | 0.003330232 |
| 1872.239963 | 88.751029  | 2.00299E-06 | 0.003750073 |

|             |            |             |             |
|-------------|------------|-------------|-------------|
| 1872.279963 | 82.95804   | 1.87225E-06 | 0.003505371 |
| 1872.319963 | 72.608632  | 1.63868E-06 | 0.003068125 |
| 1872.359963 | 73.512156  | 1.65907E-06 | 0.003106371 |
| 1872.399963 | 97.249605  | 2.19479E-06 | 0.004109521 |
| 1872.439963 | 117.320153 | 2.64775E-06 | 0.004957757 |
| 1872.479963 | 113.435851 | 2.56009E-06 | 0.004793716 |
| 1872.519963 | 112.012474 | 2.52797E-06 | 0.004733666 |
| 1872.559963 | 97.408197  | 2.19837E-06 | 0.004116575 |
| 1872.599963 | 86.468392  | 1.95147E-06 | 0.003654325 |
| 1872.639963 | 73.186451  | 1.65172E-06 | 0.00309307  |
| 1872.679963 | 63.02687   | 1.42243E-06 | 0.002663754 |
| 1872.719963 | 74.845347  | 1.68916E-06 | 0.003163315 |
| 1872.759963 | 92.583478  | 2.08948E-06 | 0.003913095 |
| 1872.799963 | 100.308284 | 2.26382E-06 | 0.004239679 |
| 1872.839963 | 81.052086  | 1.82923E-06 | 0.00342586  |
| 1872.879963 | 69.928128  | 1.57818E-06 | 0.002955743 |
| 1872.919963 | 69.804681  | 1.57539E-06 | 0.002950588 |
| 1872.959963 | 71.052069  | 1.60355E-06 | 0.003003378 |
| 1872.999963 | 85.141676  | 1.92153E-06 | 0.003599024 |
| 1873.039963 | 85.846768  | 1.93744E-06 | 0.003628906 |
| 1873.079963 | 76.666749  | 1.73026E-06 | 0.003240919 |
| 1873.119963 | 74.393065  | 1.67895E-06 | 0.003144871 |
| 1873.159963 | 92.143261  | 2.07955E-06 | 0.003895321 |
| 1873.199963 | 103.648708 | 2.33921E-06 | 0.004381802 |
| 1873.239963 | 106.8956   | 2.41248E-06 | 0.004519163 |
| 1873.279963 | 103.166243 | 2.32832E-06 | 0.004361592 |
| 1873.319963 | 88.048331  | 1.98713E-06 | 0.003722527 |
| 1873.359963 | 93.464295  | 2.10936E-06 | 0.003951589 |
| 1873.399963 | 100.434148 | 2.26666E-06 | 0.004246359 |
| 1873.439963 | 106.716697 | 2.40845E-06 | 0.004512081 |
| 1873.479963 | 120.712815 | 2.72432E-06 | 0.005103959 |
| 1873.519963 | 114.086356 | 2.57477E-06 | 0.004823883 |
| 1873.559963 | 107.072521 | 2.41648E-06 | 0.004527416 |
| 1873.599963 | 99.204204  | 2.2389E-06  | 0.004194804 |
| 1873.639963 | 98.564181  | 2.22446E-06 | 0.00416783  |
| 1873.679963 | 96.546128  | 2.17891E-06 | 0.004082583 |
| 1873.719963 | 74.735772  | 1.68668E-06 | 0.00316037  |
| 1873.759963 | 63.803351  | 1.43995E-06 | 0.002698126 |
| 1873.799963 | 63.988943  | 1.44414E-06 | 0.002706032 |
| 1873.839963 | 68.150065  | 1.53805E-06 | 0.002882063 |
| 1873.879963 | 74.774246  | 1.68755E-06 | 0.003162267 |
| 1873.919963 | 81.341606  | 1.83577E-06 | 0.00344008  |
| 1873.959963 | 93.242722  | 2.10436E-06 | 0.003943483 |
| 1873.999963 | 115.295839 | 2.60207E-06 | 0.004876273 |
| 1874.039963 | 116.130213 | 2.6209E-06  | 0.004911666 |
| 1874.079963 | 94.988354  | 2.14375E-06 | 0.004017568 |

|             |            |             |             |
|-------------|------------|-------------|-------------|
| 1874.119963 | 71.884148  | 1.62233E-06 | 0.003040432 |
| 1874.159963 | 63.166679  | 1.42558E-06 | 0.002671772 |
| 1874.199963 | 73.794863  | 1.66545E-06 | 0.003121381 |
| 1874.239963 | 87.204099  | 1.96808E-06 | 0.003688645 |
| 1874.279963 | 86.750326  | 1.95783E-06 | 0.003669529 |
| 1874.319963 | 94.16217   | 2.12511E-06 | 0.003983134 |
| 1874.359963 | 113.303253 | 2.5571E-06  | 0.004792919 |
| 1874.399963 | 114.17404  | 2.57675E-06 | 0.004829858 |
| 1874.439963 | 105.111858 | 2.37223E-06 | 0.004446599 |
| 1874.479963 | 93.463247  | 2.10934E-06 | 0.003953907 |
| 1874.519963 | 79.147639  | 1.78625E-06 | 0.003348365 |
| 1874.559963 | 74.235083  | 1.67538E-06 | 0.003140605 |
| 1874.599963 | 92.422613  | 2.08585E-06 | 0.003910134 |
| 1874.639963 | 92.934572  | 2.0974E-06  | 0.003931877 |
| 1874.679963 | 85.978266  | 1.94041E-06 | 0.003637647 |
| 1874.719963 | 82.780276  | 1.86824E-06 | 0.003502418 |
| 1874.759963 | 90.794264  | 2.0491E-06  | 0.003841571 |
| 1874.799963 | 102.219933 | 2.30696E-06 | 0.004325091 |
| 1874.839963 | 109.51109  | 2.47151E-06 | 0.004633691 |
| 1874.879963 | 111.795215 | 2.52306E-06 | 0.004730439 |
| 1874.919963 | 120.612113 | 2.72205E-06 | 0.005103621 |
| 1874.959963 | 103.028248 | 2.3252E-06  | 0.004359665 |
| 1874.999963 | 88.330544  | 1.9935E-06  | 0.003737807 |
| 1875.039963 | 79.630789  | 1.79716E-06 | 0.003369739 |
| 1875.079963 | 82.587027  | 1.86387E-06 | 0.003494913 |
| 1875.119963 | 87.444847  | 1.97351E-06 | 0.003700565 |
| 1875.159963 | 72.800472  | 1.64301E-06 | 0.003080898 |
| 1875.199963 | 63.733813  | 1.43838E-06 | 0.002697256 |
| 1875.239963 | 74.904719  | 1.6905E-06  | 0.003170084 |
| 1875.279963 | 84.354683  | 1.90377E-06 | 0.003570097 |
| 1875.319963 | 73.237101  | 1.65286E-06 | 0.00309964  |
| 1875.359963 | 69.994706  | 1.57968E-06 | 0.002962474 |
| 1875.399963 | 93.066684  | 2.10039E-06 | 0.003939063 |
| 1875.439963 | 112.215646 | 2.53255E-06 | 0.004749647 |
| 1875.479963 | 107.790808 | 2.43269E-06 | 0.004562458 |
| 1875.519963 | 90.118274  | 2.03384E-06 | 0.003814515 |
| 1875.559963 | 77.228444  | 1.74294E-06 | 0.003268986 |
| 1875.599963 | 67.34357   | 1.51985E-06 | 0.002850632 |
| 1875.639963 | 65.042708  | 1.46792E-06 | 0.002753296 |
| 1875.679963 | 73.596122  | 1.66096E-06 | 0.003115433 |
| 1875.719963 | 67.827762  | 1.53078E-06 | 0.002871311 |
| 1875.759963 | 59.497886  | 1.34278E-06 | 0.002518741 |
| 1875.799963 | 69.58457   | 1.57043E-06 | 0.002945807 |
| 1875.839963 | 80.967915  | 1.82733E-06 | 0.003427784 |
| 1875.879963 | 82.431405  | 1.86036E-06 | 0.003489816 |
| 1875.919963 | 79.929892  | 1.80391E-06 | 0.003383984 |

|             |            |             |             |
|-------------|------------|-------------|-------------|
| 1875.959963 | 84.949262  | 1.91719E-06 | 0.003596565 |
| 1875.999963 | 96.487957  | 2.1776E-06  | 0.004085175 |
| 1876.039963 | 94.800684  | 2.13952E-06 | 0.004013824 |
| 1876.079963 | 82.735467  | 1.86722E-06 | 0.003503062 |
| 1876.119963 | 69.586781  | 1.57048E-06 | 0.002946403 |
| 1876.159963 | 65.732212  | 1.48348E-06 | 0.002783254 |
| 1876.199963 | 68.298528  | 1.5414E-06  | 0.00289198  |
| 1876.239963 | 80.471972  | 1.81614E-06 | 0.003407515 |
| 1876.279963 | 93.547573  | 2.11124E-06 | 0.003961274 |
| 1876.319963 | 105.717871 | 2.38591E-06 | 0.004476721 |
| 1876.359963 | 97.165584  | 2.19289E-06 | 0.004114655 |
| 1876.399963 | 100.976868 | 2.27891E-06 | 0.004276142 |
| 1876.439963 | 116.800726 | 2.63603E-06 | 0.004946351 |
| 1876.479963 | 126.945279 | 2.86498E-06 | 0.005376074 |
| 1876.519963 | 102.557305 | 2.31458E-06 | 0.004343347 |
| 1876.559963 | 71.525975  | 1.61424E-06 | 0.003029221 |
| 1876.599963 | 62.404095  | 1.40837E-06 | 0.002642954 |
| 1876.639963 | 65.684175  | 1.4824E-06  | 0.002781932 |
| 1876.679963 | 69.596857  | 1.5707E-06  | 0.002947709 |
| 1876.719963 | 78.069099  | 1.76191E-06 | 0.003306613 |
| 1876.759963 | 86.474855  | 1.95162E-06 | 0.003662717 |
| 1876.799963 | 87.766483  | 1.98077E-06 | 0.003717504 |
| 1876.839963 | 86.811274  | 1.95921E-06 | 0.003677123 |
| 1876.879963 | 105.094086 | 2.37183E-06 | 0.004451635 |
| 1876.919963 | 102.100353 | 2.30426E-06 | 0.004324917 |
| 1876.959963 | 93.21116   | 2.10365E-06 | 0.003948459 |
| 1876.999963 | 96.884844  | 2.18656E-06 | 0.004104165 |
| 1877.039963 | 89.009395  | 2.00882E-06 | 0.003770632 |
| 1877.079963 | 68.915643  | 1.55533E-06 | 0.002919479 |
| 1877.119963 | 63.877182  | 1.44162E-06 | 0.002706092 |
| 1877.159963 | 68.311407  | 1.54169E-06 | 0.002894005 |
| 1877.199963 | 75.842917  | 1.71167E-06 | 0.003213145 |
| 1877.239963 | 74.829902  | 1.68881E-06 | 0.003170295 |
| 1877.279963 | 87.38673   | 1.9722E-06  | 0.003702365 |
| 1877.319963 | 98.69829   | 2.22748E-06 | 0.004181698 |
| 1877.359963 | 85.923704  | 1.93918E-06 | 0.003640536 |
| 1877.399963 | 81.919516  | 1.84881E-06 | 0.003470955 |
| 1877.439963 | 83.574591  | 1.88616E-06 | 0.003541156 |
| 1877.479963 | 88.147941  | 1.98938E-06 | 0.003735014 |
| 1877.519963 | 78.370222  | 1.76871E-06 | 0.003320782 |
| 1877.559963 | 67.759066  | 1.52923E-06 | 0.002871217 |
| 1877.599963 | 83.320077  | 1.88042E-06 | 0.003530673 |
| 1877.639963 | 82.544051  | 1.8629E-06  | 0.003497863 |
| 1877.679963 | 66.380355  | 1.49811E-06 | 0.002812975 |
| 1877.719963 | 63.268571  | 1.42788E-06 | 0.002681165 |
| 1877.759962 | 80.315     | 1.8126E-06  | 0.003403623 |

|             |            |             |             |
|-------------|------------|-------------|-------------|
| 1877.799962 | 108.453123 | 2.44764E-06 | 0.004596171 |
| 1877.839962 | 109.718656 | 2.4762E-06  | 0.004649902 |
| 1877.879962 | 93.642128  | 2.11337E-06 | 0.00396866  |
| 1877.919962 | 89.05351   | 2.00981E-06 | 0.003774269 |
| 1877.959962 | 83.699219  | 1.88897E-06 | 0.003547419 |
| 1877.999962 | 76.207846  | 1.7199E-06  | 0.003229981 |
| 1878.039962 | 70.89794   | 1.60007E-06 | 0.003004991 |
| 1878.079962 | 59.381276  | 1.34015E-06 | 0.002516914 |
| 1878.119962 | 56.448175  | 1.27396E-06 | 0.002392643 |
| 1878.159962 | 59.186456  | 1.33576E-06 | 0.002508763 |
| 1878.199962 | 74.565747  | 1.68285E-06 | 0.00316072  |
| 1878.239962 | 85.018188  | 1.91874E-06 | 0.003603858 |
| 1878.279962 | 81.771905  | 1.84548E-06 | 0.003466324 |
| 1878.319962 | 84.072189  | 1.89739E-06 | 0.00356391  |
| 1878.359962 | 87.413182  | 1.97279E-06 | 0.003705617 |
| 1878.399962 | 76.729601  | 1.73168E-06 | 0.003252788 |
| 1878.439962 | 70.305758  | 1.5867E-06  | 0.002980526 |
| 1878.479962 | 76.236739  | 1.72056E-06 | 0.003232032 |
| 1878.519962 | 72.953528  | 1.64646E-06 | 0.003092907 |
| 1878.559962 | 74.081549  | 1.67192E-06 | 0.003140797 |
| 1878.599962 | 77.752161  | 1.75476E-06 | 0.003296488 |
| 1878.639962 | 79.848677  | 1.80207E-06 | 0.003385447 |
| 1878.679962 | 64.971529  | 1.46632E-06 | 0.00275474  |
| 1878.719962 | 70.628389  | 1.59398E-06 | 0.00299465  |
| 1878.759962 | 88.703643  | 2.00192E-06 | 0.003761123 |
| 1878.799962 | 79.415308  | 1.79229E-06 | 0.00336736  |
| 1878.839962 | 62.690332  | 1.41483E-06 | 0.002658246 |
| 1878.879962 | 58.107925  | 1.31141E-06 | 0.002463991 |
| 1878.919962 | 69.44168   | 1.5672E-06  | 0.002944647 |
| 1878.959962 | 77.720691  | 1.75405E-06 | 0.003295785 |
| 1878.999962 | 78.272713  | 1.76651E-06 | 0.003319265 |
| 1879.039962 | 94.741604  | 2.13819E-06 | 0.004017737 |
| 1879.079962 | 99.299961  | 2.24106E-06 | 0.004211134 |
| 1879.119962 | 93.18075   | 2.10296E-06 | 0.003951714 |
| 1879.159962 | 100.995223 | 2.27932E-06 | 0.00428321  |
| 1879.199962 | 96.02648   | 2.16718E-06 | 0.004072572 |
| 1879.239962 | 91.865624  | 2.07328E-06 | 0.003896189 |
| 1879.279962 | 95.769167  | 2.16138E-06 | 0.004061832 |
| 1879.319962 | 92.85074   | 2.09551E-06 | 0.003938137 |
| 1879.359962 | 89.000958  | 2.00863E-06 | 0.003774934 |
| 1879.399962 | 77.273406  | 1.74395E-06 | 0.003277585 |
| 1879.439962 | 79.105431  | 1.7853E-06  | 0.003355363 |
| 1879.479962 | 85.01108   | 1.91858E-06 | 0.003605936 |
| 1879.519962 | 87.221629  | 1.96847E-06 | 0.00369978  |
| 1879.559962 | 74.811455  | 1.68839E-06 | 0.003173431 |
| 1879.599962 | 68.618032  | 1.54861E-06 | 0.002910774 |

|             |            |             |             |
|-------------|------------|-------------|-------------|
| 1879.639962 | 75.210599  | 1.6974E-06  | 0.003190498 |
| 1879.679962 | 84.501896  | 1.90709E-06 | 0.003584719 |
| 1879.719962 | 96.00297   | 2.16665E-06 | 0.004072701 |
| 1879.759962 | 86.902338  | 1.96126E-06 | 0.003686707 |
| 1879.799962 | 74.455232  | 1.68035E-06 | 0.003158724 |
| 1879.839962 | 83.202204  | 1.87776E-06 | 0.003529884 |
| 1879.879962 | 92.884227  | 2.09627E-06 | 0.003940732 |
| 1879.919962 | 89.482443  | 2.01949E-06 | 0.003796487 |
| 1879.959962 | 81.168785  | 1.83187E-06 | 0.003443836 |
| 1879.999962 | 71.482239  | 1.61325E-06 | 0.003032919 |
| 1880.039962 | 80.423361  | 1.81504E-06 | 0.003412354 |
| 1880.079962 | 92.192079  | 2.08065E-06 | 0.003911782 |
| 1880.119962 | 86.636542  | 1.95527E-06 | 0.003676135 |
| 1880.159962 | 75.661885  | 1.70758E-06 | 0.00321053  |
| 1880.199962 | 73.473849  | 1.6582E-06  | 0.003117752 |
| 1880.239962 | 78.913751  | 1.78097E-06 | 0.003348657 |
| 1880.279962 | 94.072741  | 2.12309E-06 | 0.003992005 |
| 1880.319962 | 92.48781   | 2.08732E-06 | 0.003924831 |
| 1880.359962 | 94.586962  | 2.1347E-06  | 0.004013997 |
| 1880.399962 | 88.755026  | 2.00308E-06 | 0.003766587 |
| 1880.439962 | 74.980535  | 1.69221E-06 | 0.003182092 |
| 1880.479962 | 77.000557  | 1.7378E-06  | 0.003267889 |
| 1880.519962 | 76.052205  | 1.71639E-06 | 0.00322771  |
| 1880.559962 | 82.007852  | 1.8508E-06  | 0.003480546 |
| 1880.599962 | 87.584093  | 1.97665E-06 | 0.00371729  |
| 1880.639962 | 83.47173   | 1.88384E-06 | 0.003542826 |
| 1880.679962 | 82.148333  | 1.85397E-06 | 0.003486731 |
| 1880.719962 | 84.810038  | 1.91404E-06 | 0.003599782 |
| 1880.759962 | 94.99636   | 2.14394E-06 | 0.004032228 |
| 1880.799962 | 101.90745  | 2.29991E-06 | 0.004325669 |
| 1880.839962 | 89.565222  | 2.02136E-06 | 0.003801859 |
| 1880.879962 | 74.966627  | 1.69189E-06 | 0.003182246 |
| 1880.919962 | 72.709475  | 1.64095E-06 | 0.003086499 |
| 1880.959962 | 85.753491  | 1.93534E-06 | 0.003640291 |
| 1880.999962 | 106.186518 | 2.39648E-06 | 0.004507782 |
| 1881.039962 | 93.883197  | 2.11881E-06 | 0.003985572 |
| 1881.079962 | 69.733607  | 1.57379E-06 | 0.002960426 |
| 1881.119962 | 57.769508  | 1.30378E-06 | 0.002452562 |
| 1881.159962 | 48.405656  | 1.09245E-06 | 0.00205507  |
| 1881.199962 | 45.479735  | 1.02641E-06 | 0.00193089  |
| 1881.239962 | 49.452478  | 1.11607E-06 | 0.002099602 |
| 1881.279962 | 50.12165   | 1.13118E-06 | 0.002128058 |
| 1881.319962 | 58.025743  | 1.30956E-06 | 0.002463702 |
| 1881.359962 | 71.200971  | 1.60691E-06 | 0.00302317  |
| 1881.399962 | 95.409881  | 2.15327E-06 | 0.004051159 |
| 1881.439962 | 101.056902 | 2.28071E-06 | 0.004291026 |

|             |            |             |             |
|-------------|------------|-------------|-------------|
| 1881.479962 | 98.774338  | 2.2292E-06  | 0.004194194 |
| 1881.519962 | 101.565866 | 2.2922E-06  | 0.00431282  |
| 1881.559962 | 96.479595  | 2.17741E-06 | 0.004096928 |
| 1881.599962 | 85.72841   | 1.93477E-06 | 0.003640465 |
| 1881.639962 | 70.384871  | 1.58849E-06 | 0.002988963 |
| 1881.679962 | 62.102489  | 1.40157E-06 | 0.0026373   |
| 1881.719962 | 59.645152  | 1.34611E-06 | 0.002532998 |
| 1881.759962 | 71.266984  | 1.6084E-06  | 0.003026616 |
| 1881.799962 | 77.575981  | 1.75078E-06 | 0.003294621 |
| 1881.839962 | 65.366047  | 1.47522E-06 | 0.002776129 |
| 1881.879962 | 55.17978   | 1.24533E-06 | 0.002343563 |
| 1881.919962 | 52.501547  | 1.18489E-06 | 0.002229862 |
| 1881.959962 | 54.083033  | 1.22058E-06 | 0.00229708  |
| 1881.999962 | 64.62069   | 1.4584E-06  | 0.002744707 |
| 1882.039962 | 67.905541  | 1.53253E-06 | 0.002884289 |
| 1882.079962 | 81.83343   | 1.84687E-06 | 0.00347595  |
| 1882.119962 | 85.489417  | 1.92938E-06 | 0.003631319 |
| 1882.159962 | 83.114667  | 1.87578E-06 | 0.003530522 |
| 1882.199962 | 78.894092  | 1.78053E-06 | 0.003351313 |
| 1882.239962 | 80.511048  | 1.81702E-06 | 0.003420072 |
| 1882.279962 | 79.576296  | 1.79593E-06 | 0.003380436 |
| 1882.319962 | 78.738323  | 1.77701E-06 | 0.003344909 |
| 1882.359962 | 86.663489  | 1.95587E-06 | 0.003681659 |
| 1882.399962 | 97.758547  | 2.20627E-06 | 0.004153091 |
| 1882.439962 | 95.65944   | 2.1589E-06  | 0.004064    |
| 1882.479962 | 76.03036   | 1.7159E-06  | 0.003230146 |
| 1882.519962 | 67.972245  | 1.53404E-06 | 0.002887859 |
| 1882.559962 | 67.690864  | 1.52769E-06 | 0.002875965 |
| 1882.599962 | 68.95464   | 1.55621E-06 | 0.002929721 |
| 1882.639962 | 68.687522  | 1.55018E-06 | 0.002918434 |
| 1882.679962 | 69.522937  | 1.56904E-06 | 0.002953992 |
| 1882.719962 | 77.482182  | 1.74866E-06 | 0.003292246 |
| 1882.759962 | 82.916299  | 1.87131E-06 | 0.003523219 |
| 1882.799962 | 73.876994  | 1.6673E-06  | 0.003139194 |
| 1882.839962 | 69.767011  | 1.57454E-06 | 0.002964615 |
| 1882.879962 | 84.563861  | 1.90849E-06 | 0.003593455 |
| 1882.919962 | 100.408558 | 2.26608E-06 | 0.00426685  |
| 1882.959962 | 107.427573 | 2.42449E-06 | 0.004565219 |
| 1882.999962 | 96.854488  | 2.18587E-06 | 0.004115995 |
| 1883.039962 | 85.827422  | 1.93701E-06 | 0.003647459 |
| 1883.079962 | 72.957041  | 1.64654E-06 | 0.003100564 |
| 1883.119962 | 68.865026  | 1.55419E-06 | 0.002926722 |
| 1883.159962 | 86.209366  | 1.94563E-06 | 0.003663924 |
| 1883.199962 | 89.599347  | 2.02213E-06 | 0.00380808  |
| 1883.239962 | 85.209996  | 1.92307E-06 | 0.003621604 |
| 1883.279962 | 93.605695  | 2.11255E-06 | 0.003978523 |

|             |            |             |             |
|-------------|------------|-------------|-------------|
| 1883.319962 | 94.909813  | 2.14198E-06 | 0.004034038 |
| 1883.359962 | 82.279522  | 1.85693E-06 | 0.003497276 |
| 1883.399962 | 74.070467  | 1.67167E-06 | 0.003148418 |
| 1883.439962 | 79.625064  | 1.79703E-06 | 0.003384592 |
| 1883.479962 | 77.532566  | 1.7498E-06  | 0.003295717 |
| 1883.519962 | 71.480883  | 1.61322E-06 | 0.00303854  |
| 1883.559962 | 61.295391  | 1.38335E-06 | 0.002605626 |
| 1883.599962 | 54.355521  | 1.22673E-06 | 0.002310666 |
| 1883.639962 | 62.11087   | 1.40176E-06 | 0.002640403 |
| 1883.679962 | 70.282703  | 1.58618E-06 | 0.002987861 |
| 1883.719962 | 82.990341  | 1.87298E-06 | 0.003528163 |
| 1883.759962 | 84.313038  | 1.90283E-06 | 0.003584471 |
| 1883.799962 | 79.0223    | 1.78342E-06 | 0.003359613 |
| 1883.839962 | 79.287418  | 1.78941E-06 | 0.003370956 |
| 1883.879962 | 84.741647  | 1.9125E-06  | 0.003602922 |
| 1883.919962 | 84.754497  | 1.91279E-06 | 0.003603545 |
| 1883.959962 | 77.445213  | 1.74783E-06 | 0.003292843 |
| 1883.999962 | 82.73781   | 1.86728E-06 | 0.00351795  |
| 1884.039962 | 85.351355  | 1.92626E-06 | 0.003629153 |
| 1884.079962 | 81.570546  | 1.84093E-06 | 0.003468466 |
| 1884.119962 | 84.826153  | 1.91441E-06 | 0.003606975 |
| 1884.159962 | 91.666588  | 2.06879E-06 | 0.003897926 |
| 1884.199962 | 79.848133  | 1.80206E-06 | 0.003395444 |
| 1884.239962 | 61.839966  | 1.39564E-06 | 0.002629724 |
| 1884.279962 | 64.460768  | 1.45479E-06 | 0.002741231 |
| 1884.319962 | 87.118703  | 1.96615E-06 | 0.003704852 |
| 1884.359962 | 98.001203  | 2.21175E-06 | 0.004167734 |
| 1884.399962 | 91.764533  | 2.071E-06   | 0.003902588 |
| 1884.439962 | 90.259652  | 2.03703E-06 | 0.003838669 |
| 1884.479962 | 81.207517  | 1.83274E-06 | 0.003453763 |
| 1884.519962 | 67.0868    | 1.51406E-06 | 0.002853268 |
| 1884.559962 | 66.664858  | 1.50453E-06 | 0.002835383 |
| 1884.599962 | 70.182829  | 1.58393E-06 | 0.002985072 |
| 1884.639962 | 74.332694  | 1.67759E-06 | 0.003161644 |
| 1884.679962 | 91.573642  | 2.06669E-06 | 0.003895048 |
| 1884.719962 | 102.465498 | 2.3125E-06  | 0.004358422 |
| 1884.759962 | 88.948343  | 2.00744E-06 | 0.003783543 |
| 1884.799962 | 75.497079  | 1.70386E-06 | 0.003211443 |
| 1884.839962 | 75.849101  | 1.71181E-06 | 0.003226485 |
| 1884.879962 | 81.792348  | 1.84594E-06 | 0.003479374 |
| 1884.919962 | 74.606157  | 1.68376E-06 | 0.003173747 |
| 1884.959962 | 67.22845   | 1.51725E-06 | 0.00285996  |
| 1884.999962 | 71.308478  | 1.60933E-06 | 0.003033593 |
| 1885.039962 | 83.139495  | 1.87634E-06 | 0.003536981 |
| 1885.079962 | 87.854846  | 1.98276E-06 | 0.003737664 |
| 1885.119962 | 95.180723  | 2.1481E-06  | 0.004049419 |



|             |           |             |             |
|-------------|-----------|-------------|-------------|
| 1885.159962 | 90.314736 | 2.03828E-06 | 0.00384248  |
| 1885.199962 | 76.899416 | 1.73551E-06 | 0.003271788 |
| 1885.239962 | 64.715363 | 1.46054E-06 | 0.00275346  |
| 1885.279962 | 67.637989 | 1.5265E-06  | 0.002877871 |
| 1885.319962 | 73.947843 | 1.6689E-06  | 0.00314641  |
| 1885.359962 | 71.373348 | 1.6108E-06  | 0.003036932 |
| 1885.399962 | 62.449067 | 1.40939E-06 | 0.002657261 |
| 1885.439962 | 71.145265 | 1.60565E-06 | 0.003027356 |
| 1885.479962 | 83.695531 | 1.88889E-06 | 0.003561467 |
| 1885.519962 | 76.493617 | 1.72635E-06 | 0.003255076 |
| 1885.559962 | 61.086614 | 1.37864E-06 | 0.002599508 |
| 1885.599962 | 54.958622 | 1.24034E-06 | 0.002338784 |
| 1885.639962 | 56.571296 | 1.27674E-06 | 0.002407463 |
| 1885.679962 | 64.675635 | 1.45964E-06 | 0.002752412 |
| 1885.719962 | 63.856838 | 1.44116E-06 | 0.002717624 |
| 1885.759962 | 71.923722 | 1.62322E-06 | 0.003061    |
| 1885.799962 | 86.511588 | 1.95245E-06 | 0.003681923 |
| 1885.839962 | 86.101574 | 1.94319E-06 | 0.00366455  |
| 1885.879962 | 93.611128 | 2.11267E-06 | 0.003984247 |
| 1885.919962 | 88.282897 | 1.99242E-06 | 0.003757548 |
| 1885.959962 | 75.625205 | 1.70676E-06 | 0.003218873 |
| 1885.999962 | 78.586159 | 1.77358E-06 | 0.003344972 |
| 1886.039962 | 75.877176 | 1.71244E-06 | 0.003229734 |
| 1886.079962 | 72.957273 | 1.64654E-06 | 0.003105514 |
| 1886.119962 | 83.575396 | 1.88618E-06 | 0.003557562 |
| 1886.159962 | 86.274943 | 1.94711E-06 | 0.003672552 |
| 1886.199962 | 75.2533   | 1.69836E-06 | 0.003203451 |
| 1886.239962 | 69.308553 | 1.5642E-06  | 0.002950452 |
| 1886.279962 | 68.05036  | 1.5358E-06  | 0.002896952 |
| 1886.319962 | 73.476178 | 1.65825E-06 | 0.003127999 |
| 1886.359962 | 76.723389 | 1.73154E-06 | 0.003266308 |
| 1886.399962 | 84.754094 | 1.91278E-06 | 0.003608272 |
| 1886.439962 | 86.708791 | 1.9569E-06  | 0.003691568 |
| 1886.479962 | 87.969679 | 1.98535E-06 | 0.003745329 |
| 1886.519962 | 88.541436 | 1.99826E-06 | 0.003769751 |
| 1886.559962 | 69.735372 | 1.57383E-06 | 0.002969125 |
| 1886.599962 | 63.964187 | 1.44358E-06 | 0.002723463 |
| 1886.639962 | 80.149043 | 1.80885E-06 | 0.003412653 |
| 1886.679962 | 81.083298 | 1.82994E-06 | 0.003452506 |
| 1886.719962 | 67.189179 | 1.51637E-06 | 0.002860958 |
| 1886.759962 | 58.697757 | 1.32473E-06 | 0.002499441 |
| 1886.799962 | 61.244371 | 1.3822E-06  | 0.002607935 |
| 1886.839962 | 73.816462 | 1.66593E-06 | 0.003143352 |
| 1886.879962 | 80.654891 | 1.82027E-06 | 0.003434628 |
| 1886.919962 | 76.736467 | 1.73184E-06 | 0.003267834 |
| 1886.959962 | 71.040033 | 1.60327E-06 | 0.003025315 |

|             |            |             |             |
|-------------|------------|-------------|-------------|
| 1886.999962 | 69.82286   | 1.5758E-06  | 0.002973543 |
| 1887.039962 | 71.175445  | 1.60633E-06 | 0.00303121  |
| 1887.079962 | 78.167536  | 1.76413E-06 | 0.003329059 |
| 1887.119962 | 81.090096  | 1.83009E-06 | 0.0034536   |
| 1887.159962 | 82.536589  | 1.86274E-06 | 0.003515281 |
| 1887.199962 | 91.22456   | 2.05881E-06 | 0.003885389 |
| 1887.239962 | 99.637612  | 2.24868E-06 | 0.004243803 |
| 1887.279962 | 98.941714  | 2.23298E-06 | 0.004214252 |
| 1887.319962 | 82.070886  | 1.85223E-06 | 0.003495742 |
| 1887.359962 | 65.242693  | 1.47244E-06 | 0.002779018 |
| 1887.399962 | 66.859257  | 1.50892E-06 | 0.002847936 |
| 1887.439962 | 75.53968   | 1.70483E-06 | 0.003217756 |
| 1887.479962 | 77.824816  | 1.7564E-06  | 0.003315165 |
| 1887.519962 | 81.765772  | 1.84534E-06 | 0.003483115 |
| 1887.559962 | 98.540583  | 2.22392E-06 | 0.004197789 |
| 1887.599962 | 100.127414 | 2.25974E-06 | 0.004265478 |
| 1887.639962 | 93.622408  | 2.11293E-06 | 0.003988446 |
| 1887.679962 | 84.422166  | 1.90529E-06 | 0.003596579 |
| 1887.719962 | 84.138943  | 1.8989E-06  | 0.003584589 |
| 1887.759962 | 79.528652  | 1.79485E-06 | 0.003388248 |
| 1887.799962 | 71.018247  | 1.60278E-06 | 0.003025734 |
| 1887.839962 | 68.267454  | 1.5407E-06  | 0.002908598 |
| 1887.879962 | 68.362241  | 1.54284E-06 | 0.002912698 |
| 1887.919962 | 65.105808  | 1.46935E-06 | 0.00277401  |
| 1887.959962 | 65.289251  | 1.47349E-06 | 0.002781885 |
| 1887.999962 | 58.795758  | 1.32694E-06 | 0.00250526  |
| 1888.039962 | 57.359856  | 1.29453E-06 | 0.002444128 |
| 1888.079962 | 76.238171  | 1.72059E-06 | 0.00324861  |
| 1888.119962 | 85.746607  | 1.93518E-06 | 0.003653855 |
| 1888.159962 | 81.594056  | 1.84146E-06 | 0.003476979 |
| 1888.199962 | 77.88155   | 1.75768E-06 | 0.003318848 |
| 1888.239962 | 79.375339  | 1.79139E-06 | 0.003382576 |
| 1888.279962 | 73.209266  | 1.65223E-06 | 0.003119875 |
| 1888.319962 | 78.228646  | 1.76551E-06 | 0.003333851 |
| 1888.359962 | 85.579568  | 1.93141E-06 | 0.0036472   |
| 1888.399962 | 72.299872  | 1.63171E-06 | 0.003081316 |
| 1888.439962 | 67.706581  | 1.52804E-06 | 0.002885618 |
| 1888.479962 | 61.956578  | 1.39827E-06 | 0.002640612 |
| 1888.519962 | 60.83029   | 1.37285E-06 | 0.002592664 |
| 1888.559962 | 60.011206  | 1.35437E-06 | 0.002557808 |
| 1888.599962 | 64.591454  | 1.45774E-06 | 0.002753086 |
| 1888.639962 | 84.461539  | 1.90618E-06 | 0.003600086 |
| 1888.679962 | 89.487535  | 2.01961E-06 | 0.003814395 |
| 1888.719962 | 88.216053  | 1.99091E-06 | 0.003760278 |
| 1888.759962 | 92.339636  | 2.08398E-06 | 0.003936132 |
| 1888.799962 | 87.362053  | 1.97164E-06 | 0.003724033 |

|             |            |             |             |
|-------------|------------|-------------|-------------|
| 1888.839962 | 75.53415   | 1.7047E-06  | 0.003219907 |
| 1888.879962 | 74.039851  | 1.67098E-06 | 0.003156274 |
| 1888.919962 | 75.735466  | 1.70924E-06 | 0.003228625 |
| 1888.959962 | 73.278524  | 1.65379E-06 | 0.003123951 |
| 1888.999962 | 72.8814    | 1.64483E-06 | 0.003107087 |
| 1889.039962 | 86.742217  | 1.95765E-06 | 0.003698081 |
| 1889.079962 | 78.611943  | 1.77416E-06 | 0.003351534 |
| 1889.119962 | 70.920514  | 1.60058E-06 | 0.003023682 |
| 1889.159962 | 79.11642   | 1.78555E-06 | 0.003373185 |
| 1889.199962 | 79.145822  | 1.78621E-06 | 0.00337451  |
| 1889.239962 | 79.488031  | 1.79393E-06 | 0.003389172 |
| 1889.279962 | 89.867763  | 2.02819E-06 | 0.003831819 |
| 1889.319962 | 97.750248  | 2.20609E-06 | 0.004168004 |
| 1889.359962 | 103.257363 | 2.33037E-06 | 0.004402917 |
| 1889.399962 | 108.030883 | 2.43811E-06 | 0.004606558 |
| 1889.439962 | 99.897084  | 2.25454E-06 | 0.004259814 |
| 1889.479962 | 90.895922  | 2.05139E-06 | 0.003876069 |
| 1889.519962 | 81.42517   | 1.83765E-06 | 0.003472281 |
| 1889.559962 | 70.321099  | 1.58705E-06 | 0.002998825 |
| 1889.599962 | 50.699172  | 1.14421E-06 | 0.002162099 |
| 1889.639962 | 54.955073  | 1.24026E-06 | 0.002343644 |
| 1889.679962 | 66.08968   | 1.49155E-06 | 0.002818556 |
| 1889.719962 | 69.43582   | 1.56707E-06 | 0.002961323 |
| 1889.759962 | 71.812179  | 1.6207E-06  | 0.003062736 |
| 1889.799962 | 69.845557  | 1.57632E-06 | 0.002978924 |
| 1889.839962 | 75.649008  | 1.70729E-06 | 0.00322651  |
| 1889.879962 | 77.776779  | 1.75531E-06 | 0.003317332 |
| 1889.919962 | 69.619787  | 1.57122E-06 | 0.002969483 |
| 1889.959962 | 73.163249  | 1.65119E-06 | 0.003120688 |
| 1889.999962 | 71.847573  | 1.6215E-06  | 0.003064634 |
| 1890.039962 | 69.886278  | 1.57724E-06 | 0.002981039 |
| 1890.079962 | 83.664525  | 1.88819E-06 | 0.003568833 |
| 1890.119962 | 90.344791  | 2.03896E-06 | 0.003853872 |
| 1890.159962 | 93.050326  | 2.10002E-06 | 0.003969367 |
| 1890.199962 | 88.994443  | 2.00848E-06 | 0.00379643  |
| 1890.239962 | 71.038845  | 1.60325E-06 | 0.003030523 |
| 1890.279962 | 75.376317  | 1.70114E-06 | 0.003215628 |
| 1890.319962 | 87.336734  | 1.97107E-06 | 0.00372595  |
| 1890.359962 | 82.717505  | 1.86682E-06 | 0.00352896  |
| 1890.399962 | 75.665449  | 1.70766E-06 | 0.003228168 |
| 1890.439962 | 67.025142  | 1.51266E-06 | 0.002859601 |
| 1890.479962 | 73.557269  | 1.66009E-06 | 0.003138358 |
| 1890.519962 | 82.118687  | 1.8533E-06  | 0.003503709 |
| 1890.559962 | 78.307274  | 1.76729E-06 | 0.00334116  |
| 1890.599962 | 66.558474  | 1.50213E-06 | 0.002839931 |
| 1890.639962 | 64.827975  | 1.46308E-06 | 0.002766152 |

|             |            |             |             |
|-------------|------------|-------------|-------------|
| 1890.679962 | 72.83764   | 1.64384E-06 | 0.003107983 |
| 1890.719962 | 72.471356  | 1.63558E-06 | 0.003092419 |
| 1890.759962 | 70.327963  | 1.5872E-06  | 0.003001022 |
| 1890.799962 | 71.241367  | 1.60782E-06 | 0.003040063 |
| 1890.839962 | 78.992438  | 1.78275E-06 | 0.003370894 |
| 1890.879962 | 95.568411  | 2.15685E-06 | 0.004078337 |
| 1890.919962 | 99.237683  | 2.23966E-06 | 0.004235011 |
| 1890.959962 | 99.873235  | 2.254E-06   | 0.004262223 |
| 1890.999962 | 94.854555  | 2.14074E-06 | 0.00404813  |
| 1891.039962 | 88.637572  | 2.00043E-06 | 0.003782887 |
| 1891.079962 | 83.934075  | 1.89428E-06 | 0.003582226 |
| 1891.119962 | 70.345341  | 1.5876E-06  | 0.003002335 |
| 1891.159962 | 60.701259  | 1.36994E-06 | 0.002590781 |
| 1891.199962 | 60.070908  | 1.35572E-06 | 0.002563931 |
| 1891.239962 | 63.928707  | 1.44278E-06 | 0.002728647 |
| 1891.279962 | 76.505526  | 1.72662E-06 | 0.003265528 |
| 1891.319962 | 80.749517  | 1.8224E-06  | 0.003446749 |
| 1891.359962 | 78.011338  | 1.76061E-06 | 0.003329942 |
| 1891.399962 | 70.782383  | 1.59746E-06 | 0.003021435 |
| 1891.439962 | 71.402237  | 1.61145E-06 | 0.003047959 |
| 1891.479962 | 86.639289  | 1.95533E-06 | 0.003698464 |
| 1891.519962 | 96.592784  | 2.17996E-06 | 0.004123447 |
| 1891.559962 | 81.792047  | 1.84593E-06 | 0.003491692 |
| 1891.599962 | 69.868817  | 1.57684E-06 | 0.002982754 |
| 1891.639962 | 67.931428  | 1.53312E-06 | 0.002900107 |
| 1891.679962 | 77.315543  | 1.7449E-06  | 0.0033008   |
| 1891.719962 | 83.940165  | 1.89441E-06 | 0.003583698 |
| 1891.759962 | 80.933138  | 1.82655E-06 | 0.003455391 |
| 1891.799962 | 69.343824  | 1.56499E-06 | 0.002960655 |
| 1891.839962 | 83.82744   | 1.89187E-06 | 0.003579113 |
| 1891.879962 | 101.512722 | 2.291E-06   | 0.004334298 |
| 1891.919962 | 92.322012  | 2.08358E-06 | 0.003941965 |
| 1891.959962 | 78.004578  | 1.76045E-06 | 0.00333071  |
| 1891.999962 | 87.280064  | 1.96979E-06 | 0.003726842 |
| 1892.039962 | 97.519084  | 2.20087E-06 | 0.004164134 |
| 1892.079962 | 95.10644   | 2.14642E-06 | 0.004061198 |
| 1892.119962 | 81.121094  | 1.83079E-06 | 0.003464074 |
| 1892.159962 | 72.109429  | 1.62741E-06 | 0.003079319 |
| 1892.199962 | 78.378079  | 1.76888E-06 | 0.003347082 |
| 1892.239962 | 76.543251  | 1.72747E-06 | 0.003268796 |
| 1892.279962 | 87.602285  | 1.97706E-06 | 0.003741154 |
| 1892.319962 | 113.112609 | 2.55279E-06 | 0.004830703 |
| 1892.359962 | 114.838505 | 2.59175E-06 | 0.004904515 |
| 1892.399962 | 99.603205  | 2.24791E-06 | 0.004253936 |
| 1892.439962 | 93.693867  | 2.11454E-06 | 0.00400164  |
| 1892.479962 | 85.703867  | 1.93422E-06 | 0.003660467 |

|             |            |             |             |
|-------------|------------|-------------|-------------|
| 1892.519962 | 97.442499  | 2.19914E-06 | 0.004161919 |
| 1892.559962 | 92.003982  | 2.0764E-06  | 0.003929715 |
| 1892.599962 | 75.425547  | 1.70225E-06 | 0.003221677 |
| 1892.639962 | 66.770348  | 1.50691E-06 | 0.002852045 |
| 1892.679962 | 77.231971  | 1.74302E-06 | 0.003298975 |
| 1892.719962 | 81.258134  | 1.83388E-06 | 0.003471027 |
| 1892.759962 | 67.47151   | 1.52274E-06 | 0.002882178 |
| 1892.799962 | 59.583427  | 1.34471E-06 | 0.002545276 |
| 1892.839962 | 64.109861  | 1.44687E-06 | 0.002738694 |
| 1892.879962 | 77.868176  | 1.75738E-06 | 0.003326502 |
| 1892.919962 | 96.40299   | 2.17568E-06 | 0.00411839  |
| 1892.959962 | 83.857008  | 1.89254E-06 | 0.003582495 |
| 1892.999962 | 68.365048  | 1.5429E-06  | 0.002920717 |
| 1893.039962 | 75.498771  | 1.7039E-06  | 0.003225555 |
| 1893.079962 | 80.662531  | 1.82044E-06 | 0.00344624  |
| 1893.119962 | 83.455259  | 1.88347E-06 | 0.003565633 |
| 1893.159962 | 74.124846  | 1.67289E-06 | 0.003167057 |
| 1893.199962 | 76.652326  | 1.72994E-06 | 0.003275115 |
| 1893.239962 | 100.400251 | 2.26589E-06 | 0.004289881 |
| 1893.279962 | 96.412857  | 2.1759E-06  | 0.004119595 |
| 1893.319962 | 76.807028  | 1.73343E-06 | 0.003281933 |
| 1893.359962 | 76.557837  | 1.7278E-06  | 0.003271354 |
| 1893.399962 | 78.253171  | 1.76607E-06 | 0.003343868 |
| 1893.439962 | 85.357467  | 1.9264E-06  | 0.003647521 |
| 1893.479962 | 85.098312  | 1.92055E-06 | 0.003636524 |
| 1893.519962 | 85.606411  | 1.93202E-06 | 0.003658314 |
| 1893.559962 | 84.206102  | 1.90041E-06 | 0.003598549 |
| 1893.599962 | 71.151125  | 1.60578E-06 | 0.003040708 |
| 1893.639962 | 69.212551  | 1.56203E-06 | 0.002957924 |
| 1893.679962 | 71.192319  | 1.60671E-06 | 0.003042597 |
| 1893.719962 | 79.724533  | 1.79927E-06 | 0.003407317 |
| 1893.759962 | 72.598615  | 1.63845E-06 | 0.00310283  |
| 1893.799962 | 60.927557  | 1.37505E-06 | 0.00260407  |
| 1893.839962 | 63.948861  | 1.44324E-06 | 0.002733259 |
| 1893.879962 | 85.407572  | 1.92753E-06 | 0.00365051  |
| 1893.919962 | 94.058469  | 2.12277E-06 | 0.004020354 |
| 1893.959962 | 96.236244  | 2.17192E-06 | 0.004113526 |
| 1893.999962 | 80.5319    | 1.81749E-06 | 0.003442331 |
| 1894.039962 | 63.236661  | 1.42716E-06 | 0.002703104 |
| 1894.079962 | 66.061257  | 1.49091E-06 | 0.002823904 |
| 1894.119962 | 78.24074   | 1.76578E-06 | 0.003344608 |
| 1894.159962 | 80.414902  | 1.81485E-06 | 0.003437621 |
| 1894.199962 | 76.609053  | 1.72896E-06 | 0.003274995 |
| 1894.239962 | 69.594828  | 1.57066E-06 | 0.002975204 |
| 1894.279962 | 77.949495  | 1.75921E-06 | 0.003332439 |
| 1894.319962 | 86.171877  | 1.94478E-06 | 0.003684034 |

|             |           |             |             |
|-------------|-----------|-------------|-------------|
| 1894.359962 | 77.777065 | 1.75532E-06 | 0.003325208 |
| 1894.399962 | 82.401506 | 1.85969E-06 | 0.003522991 |
| 1894.439962 | 74.783858 | 1.68777E-06 | 0.003197374 |
| 1894.479962 | 56.174743 | 1.26779E-06 | 0.002401795 |
| 1894.519962 | 74.926437 | 1.69099E-06 | 0.003203605 |
| 1894.559962 | 95.300043 | 2.15079E-06 | 0.004074799 |
| 1894.599962 | 93.479066 | 2.10969E-06 | 0.003997023 |
| 1894.639962 | 88.693372 | 2.00169E-06 | 0.003792474 |
| 1894.679962 | 85.406509 | 1.92751E-06 | 0.003652007 |
| 1894.719962 | 71.836689 | 1.62125E-06 | 0.003071822 |
| 1894.759962 | 63.258685 | 1.42766E-06 | 0.002705074 |
| 1894.799962 | 64.287051 | 1.45087E-06 | 0.002749107 |
| 1894.839962 | 80.859027 | 1.82488E-06 | 0.003457847 |
| 1894.879962 | 94.108443 | 2.1239E-06  | 0.004024529 |
| 1894.919962 | 86.690356 | 1.95648E-06 | 0.003707374 |
| 1894.959962 | 77.168673 | 1.74159E-06 | 0.003300242 |
| 1894.999962 | 59.666447 | 1.34659E-06 | 0.002551785 |
| 1895.039962 | 46.210224 | 1.0429E-06  | 0.001976338 |
| 1895.079962 | 56.979848 | 1.28596E-06 | 0.002436989 |
| 1895.119962 | 70.831764 | 1.59857E-06 | 0.00302949  |
| 1895.159962 | 69.761167 | 1.57441E-06 | 0.002983763 |
| 1895.199962 | 71.726434 | 1.61877E-06 | 0.003067885 |
| 1895.239962 | 69.173941 | 1.56116E-06 | 0.002958772 |
| 1895.279962 | 70.859545 | 1.5992E-06  | 0.003030934 |
| 1895.319962 | 78.334329 | 1.7679E-06  | 0.00335073  |
| 1895.359962 | 82.692942 | 1.86626E-06 | 0.003537243 |
| 1895.399962 | 82.059353 | 1.85197E-06 | 0.003510215 |
| 1895.439962 | 87.969041 | 1.98534E-06 | 0.00376309  |
| 1895.479962 | 85.571754 | 1.93124E-06 | 0.003660618 |
| 1895.519962 | 81.872624 | 1.84775E-06 | 0.003502449 |
| 1895.559962 | 86.475789 | 1.95164E-06 | 0.003699447 |
| 1895.599962 | 94.546459 | 2.13378E-06 | 0.004044797 |
| 1895.639962 | 88.773159 | 2.00349E-06 | 0.003797889 |
| 1895.679962 | 70.609885 | 1.59357E-06 | 0.003020893 |
| 1895.719962 | 67.134503 | 1.51513E-06 | 0.002872266 |
| 1895.759962 | 68.192285 | 1.539E-06   | 0.002917584 |
| 1895.799962 | 62.930065 | 1.42024E-06 | 0.002692498 |
| 1895.839962 | 64.925412 | 1.46528E-06 | 0.002777929 |
| 1895.879962 | 73.525957 | 1.65938E-06 | 0.003145982 |
| 1895.919962 | 72.383494 | 1.63359E-06 | 0.003097165 |
| 1895.959962 | 76.562506 | 1.72791E-06 | 0.003276047 |
| 1895.999962 | 83.970822 | 1.8951E-06  | 0.003593118 |
| 1896.039962 | 89.620338 | 2.02261E-06 | 0.003834942 |
| 1896.079962 | 82.541551 | 1.86285E-06 | 0.003532108 |
| 1896.119962 | 70.968864 | 1.60167E-06 | 0.003036955 |
| 1896.159962 | 69.322935 | 1.56452E-06 | 0.002966584 |

|             |           |             |             |
|-------------|-----------|-------------|-------------|
| 1896.199962 | 74.868707 | 1.68968E-06 | 0.003203976 |
| 1896.239962 | 77.671652 | 1.75294E-06 | 0.003323997 |
| 1896.279962 | 81.424972 | 1.83765E-06 | 0.003484695 |
| 1896.319962 | 73.088799 | 1.64951E-06 | 0.003128003 |
| 1896.359962 | 62.36419  | 1.40747E-06 | 0.002669075 |
| 1896.399962 | 61.324425 | 1.38401E-06 | 0.002624631 |
| 1896.439962 | 64.080936 | 1.44622E-06 | 0.002742665 |
| 1896.479962 | 79.695882 | 1.79863E-06 | 0.003411056 |
| 1896.519962 | 82.405961 | 1.85979E-06 | 0.003527125 |
| 1896.559962 | 87.113281 | 1.96603E-06 | 0.003728685 |
| 1896.599962 | 96.028662 | 2.16723E-06 | 0.004110374 |
| 1896.639962 | 90.302152 | 2.03799E-06 | 0.00386534  |
| 1896.679962 | 89.306708 | 2.01553E-06 | 0.003822812 |
| 1896.719962 | 77.642354 | 1.75228E-06 | 0.003323584 |
| 1896.759962 | 70.235853 | 1.58513E-06 | 0.003006602 |
| 1896.799962 | 62.48816  | 1.41027E-06 | 0.002675001 |
| 1896.839962 | 64.212332 | 1.44918E-06 | 0.002748868 |
| 1896.879962 | 68.930606 | 1.55567E-06 | 0.002950915 |
| 1896.919962 | 87.014516 | 1.9638E-06  | 0.003725165 |
| 1896.959962 | 90.583884 | 2.04435E-06 | 0.003878054 |
| 1896.999962 | 81.631037 | 1.8423E-06  | 0.003494841 |
| 1897.039962 | 91.974385 | 2.07573E-06 | 0.00393775  |
| 1897.079962 | 92.111859 | 2.07884E-06 | 0.003943719 |
| 1897.119962 | 87.931948 | 1.9845E-06  | 0.003764838 |
| 1897.159962 | 90.487123 | 2.04217E-06 | 0.00387432  |
| 1897.199962 | 84.641069 | 1.91023E-06 | 0.00362409  |
| 1897.239962 | 87.900783 | 1.9838E-06  | 0.003763741 |
| 1897.279962 | 92.620676 | 2.09032E-06 | 0.003965922 |
| 1897.319962 | 84.987994 | 1.91806E-06 | 0.003639175 |
| 1897.359962 | 81.401884 | 1.83713E-06 | 0.003485691 |
| 1897.399962 | 73.622643 | 1.66156E-06 | 0.003152645 |
| 1897.439962 | 67.756918 | 1.52918E-06 | 0.002901526 |
| 1897.479962 | 64.879997 | 1.46425E-06 | 0.002778387 |
| 1897.519962 | 72.239838 | 1.63035E-06 | 0.003093626 |
| 1897.559962 | 80.040372 | 1.8064E-06  | 0.003427752 |
| 1897.599962 | 74.717488 | 1.68627E-06 | 0.003199865 |
| 1897.639962 | 80.67338  | 1.82069E-06 | 0.003455006 |
| 1897.679962 | 92.394695 | 2.08522E-06 | 0.003957079 |
| 1897.719962 | 89.140733 | 2.01178E-06 | 0.003817799 |
| 1897.759962 | 86.200928 | 1.94543E-06 | 0.003691968 |
| 1897.799962 | 87.803696 | 1.98161E-06 | 0.003760694 |
| 1897.839962 | 86.066321 | 1.9424E-06  | 0.003686359 |
| 1897.879962 | 78.224146 | 1.76541E-06 | 0.003350536 |
| 1897.919962 | 71.527426 | 1.61427E-06 | 0.003063764 |
| 1897.959962 | 80.3754   | 1.81396E-06 | 0.003442825 |
| 1897.999962 | 86.759183 | 1.95803E-06 | 0.003716348 |

|             |           |             |             |
|-------------|-----------|-------------|-------------|
| 1898.039962 | 82.83304  | 1.86943E-06 | 0.003548246 |
| 1898.079962 | 81.341378 | 1.83576E-06 | 0.003484422 |
| 1898.119962 | 74.466326 | 1.6806E-06  | 0.003189983 |
| 1898.159962 | 70.184296 | 1.58396E-06 | 0.003006613 |
| 1898.199962 | 66.729911 | 1.506E-06   | 0.002858691 |
| 1898.239962 | 65.946233 | 1.48831E-06 | 0.002825178 |
| 1898.279962 | 59.86497  | 1.35107E-06 | 0.002564707 |
| 1898.319962 | 53.727657 | 1.21256E-06 | 0.002301824 |
| 1898.359962 | 55.293136 | 1.24789E-06 | 0.002368943 |
| 1898.399962 | 64.784045 | 1.46209E-06 | 0.002775623 |
| 1898.439962 | 70.432754 | 1.58957E-06 | 0.003017702 |
| 1898.479962 | 78.104848 | 1.76272E-06 | 0.003346484 |
| 1898.519962 | 91.329894 | 2.06119E-06 | 0.003913208 |
| 1898.559962 | 91.319576 | 2.06096E-06 | 0.003912848 |
| 1898.599962 | 80.923657 | 1.82633E-06 | 0.003467478 |
| 1898.639962 | 85.204716 | 1.92295E-06 | 0.003650993 |
| 1898.679962 | 83.205666 | 1.87784E-06 | 0.00356541  |
| 1898.719962 | 80.446692 | 1.81557E-06 | 0.003447259 |
| 1898.759962 | 75.677067 | 1.70793E-06 | 0.003242941 |
| 1898.799962 | 72.519871 | 1.63667E-06 | 0.003107714 |
| 1898.839962 | 60.280508 | 1.36045E-06 | 0.002583271 |
| 1898.879962 | 55.988989 | 1.26359E-06 | 0.002399412 |
| 1898.919962 | 56.24455  | 1.26936E-06 | 0.002410415 |
| 1898.959962 | 49.87064  | 1.12551E-06 | 0.0021373   |
| 1898.999962 | 55.551804 | 1.25373E-06 | 0.002380827 |
| 1899.039962 | 59.664774 | 1.34655E-06 | 0.002557154 |
| 1899.079962 | 56.065743 | 1.26533E-06 | 0.002402955 |
| 1899.119962 | 69.113298 | 1.55979E-06 | 0.00296223  |
| 1899.159962 | 87.689299 | 1.97903E-06 | 0.003758486 |
| 1899.199962 | 98.784149 | 2.22942E-06 | 0.004234116 |
| 1899.239962 | 94.185983 | 2.12565E-06 | 0.004037113 |
| 1899.279962 | 82.86675  | 1.87019E-06 | 0.003552009 |
| 1899.319962 | 62.045625 | 1.40028E-06 | 0.002659586 |
| 1899.359962 | 54.051881 | 1.21988E-06 | 0.002316983 |
| 1899.399962 | 65.459133 | 1.47732E-06 | 0.002806024 |
| 1899.439962 | 69.070973 | 1.55884E-06 | 0.002960915 |
| 1899.479962 | 64.863994 | 1.46389E-06 | 0.00278063  |
| 1899.519962 | 55.38662  | 1.25E-06    | 0.002374398 |
| 1899.559962 | 64.931927 | 1.46542E-06 | 0.002783659 |
| 1899.599962 | 76.414954 | 1.72458E-06 | 0.00327601  |
| 1899.639962 | 81.948274 | 1.84946E-06 | 0.003513305 |
| 1899.679962 | 70.462326 | 1.59024E-06 | 0.003020941 |
| 1899.719962 | 60.457332 | 1.36444E-06 | 0.00259205  |
| 1899.759962 | 55.862423 | 1.26074E-06 | 0.002395098 |
| 1899.799962 | 57.399075 | 1.29542E-06 | 0.002461033 |
| 1899.839962 | 61.570677 | 1.38956E-06 | 0.00263995  |



|             |           |             |             |
|-------------|-----------|-------------|-------------|
| 1899.879962 | 63.961558 | 1.44352E-06 | 0.002742521 |
| 1899.919962 | 65.339689 | 1.47463E-06 | 0.002801671 |
| 1899.959962 | 68.492518 | 1.54578E-06 | 0.002936921 |
| 1899.999962 | 67.256091 | 1.51788E-06 | 0.002883965 |
| 1900.039962 | 59.235286 | 1.33686E-06 | 0.002540083 |
| 1900.079962 | 49.942582 | 1.12713E-06 | 0.002141646 |
| 1900.119962 | 55.983529 | 1.26347E-06 | 0.002400745 |
| 1900.159962 | 63.811438 | 1.44014E-06 | 0.002736487 |
| 1900.199962 | 68.476182 | 1.54541E-06 | 0.002936592 |
| 1900.239962 | 79.316788 | 1.79007E-06 | 0.003401561 |
| 1900.279962 | 78.013604 | 1.76066E-06 | 0.003345744 |
| 1900.319962 | 78.386277 | 1.76907E-06 | 0.003361797 |
| 1900.359962 | 92.815039 | 2.09471E-06 | 0.003980696 |
| 1900.399962 | 91.42116  | 2.06325E-06 | 0.003920997 |
| 1900.439962 | 86.836067 | 1.95977E-06 | 0.003724423 |
| 1900.479962 | 73.104481 | 1.64987E-06 | 0.003135538 |
| 1900.519962 | 67.456844 | 1.52241E-06 | 0.002893365 |
| 1900.559962 | 77.094033 | 1.7399E-06  | 0.003306794 |
| 1900.599962 | 82.780364 | 1.86824E-06 | 0.003550772 |
| 1900.639962 | 72.258084 | 1.63076E-06 | 0.003099496 |
| 1900.679962 | 74.28465  | 1.6765E-06  | 0.003186492 |
| 1900.719962 | 66.68171  | 1.50491E-06 | 0.002860419 |
| 1900.759962 | 59.746309 | 1.34839E-06 | 0.002562968 |
| 1900.799962 | 69.592389 | 1.5706E-06  | 0.002985403 |
| 1900.839962 | 74.328607 | 1.67749E-06 | 0.003188646 |
| 1900.879962 | 75.70311  | 1.70851E-06 | 0.00324768  |
| 1900.919962 | 75.144462 | 1.69591E-06 | 0.003223781 |
| 1900.959962 | 75.782801 | 1.71031E-06 | 0.003251235 |
| 1900.999962 | 65.092491 | 1.46905E-06 | 0.002792658 |
| 1901.039962 | 61.929539 | 1.39766E-06 | 0.002657014 |
| 1901.079962 | 65.031473 | 1.46767E-06 | 0.002790158 |
| 1901.119962 | 75.932156 | 1.71368E-06 | 0.003257917 |
| 1901.159962 | 77.4283   | 1.74745E-06 | 0.00332218  |
| 1901.199962 | 64.929152 | 1.46536E-06 | 0.002785943 |
| 1901.239962 | 65.929531 | 1.48794E-06 | 0.002828927 |
| 1901.279962 | 72.921732 | 1.64574E-06 | 0.003129016 |
| 1901.319962 | 80.634978 | 1.81982E-06 | 0.003460058 |
| 1901.359962 | 84.742301 | 1.91252E-06 | 0.003636381 |
| 1901.399962 | 85.782045 | 1.93598E-06 | 0.003681075 |
| 1901.439962 | 95.989198 | 2.16634E-06 | 0.00411917  |
| 1901.479962 | 92.533847 | 2.08836E-06 | 0.003970975 |
| 1901.519962 | 82.592536 | 1.864E-06   | 0.00354443  |
| 1901.559962 | 82.804967 | 1.86879E-06 | 0.003553622 |
| 1901.599962 | 78.659998 | 1.77525E-06 | 0.003375809 |
| 1901.639962 | 63.08069  | 1.42364E-06 | 0.002707257 |
| 1901.679962 | 56.637482 | 1.27823E-06 | 0.002430783 |

|             |            |             |             |
|-------------|------------|-------------|-------------|
| 1901.719962 | 76.130778  | 1.71817E-06 | 0.00326747  |
| 1901.759962 | 88.322234  | 1.99331E-06 | 0.003790797 |
| 1901.799962 | 93.041999  | 2.09983E-06 | 0.003993453 |
| 1901.839962 | 102.796537 | 2.31997E-06 | 0.004412221 |
| 1901.879962 | 110.644665 | 2.4971E-06  | 0.004749177 |
| 1901.919962 | 107.686678 | 2.43034E-06 | 0.004622309 |
| 1901.959962 | 71.672452  | 1.61755E-06 | 0.00307651  |
| 1901.999962 | 50.729417  | 1.14489E-06 | 0.002177585 |
| 1902.039962 | 56.722513  | 1.28015E-06 | 0.002434893 |
| 1902.079962 | 70.762506  | 1.59701E-06 | 0.003037643 |
| 1902.119962 | 79.261813  | 1.78883E-06 | 0.003402567 |
| 1902.159962 | 90.8746    | 2.05091E-06 | 0.003901165 |
| 1902.199962 | 96.135852  | 2.16965E-06 | 0.004127112 |
| 1902.239962 | 83.869585  | 1.89282E-06 | 0.003600597 |
| 1902.279962 | 87.878955  | 1.98331E-06 | 0.003772803 |
| 1902.319962 | 87.969827  | 1.98536E-06 | 0.003776783 |
| 1902.359962 | 73.198953  | 1.652E-06   | 0.003142696 |
| 1902.399962 | 61.772916  | 1.39413E-06 | 0.00265219  |
| 1902.439962 | 65.612427  | 1.48078E-06 | 0.002817097 |
| 1902.479962 | 72.097461  | 1.62714E-06 | 0.0030956   |
| 1902.519962 | 63.564841  | 1.43457E-06 | 0.002729298 |
| 1902.559962 | 56.327198  | 1.27123E-06 | 0.002418584 |
| 1902.599962 | 63.698343  | 1.43758E-06 | 0.002735145 |
| 1902.639962 | 71.061933  | 1.60377E-06 | 0.003051395 |
| 1902.679962 | 65.723394  | 1.48329E-06 | 0.002822218 |
| 1902.719962 | 60.852458  | 1.37336E-06 | 0.00261311  |
| 1902.759962 | 66.21435   | 1.49437E-06 | 0.002843419 |
| 1902.799962 | 72.329304  | 1.63237E-06 | 0.003106077 |
| 1902.839962 | 78.775165  | 1.77785E-06 | 0.003382956 |
| 1902.879962 | 74.986362  | 1.69234E-06 | 0.003220316 |
| 1902.919962 | 74.002286  | 1.67013E-06 | 0.003178121 |
| 1902.959962 | 68.864551  | 1.55418E-06 | 0.002957537 |
| 1902.999962 | 63.950362  | 1.44327E-06 | 0.002746544 |
| 1903.039962 | 60.910318  | 1.37466E-06 | 0.002616035 |
| 1903.079962 | 75.977384  | 1.7147E-06  | 0.003263218 |
| 1903.119962 | 85.918782  | 1.93907E-06 | 0.003690278 |
| 1903.159962 | 78.725059  | 1.77671E-06 | 0.003381373 |
| 1903.199962 | 79.185481  | 1.78711E-06 | 0.00340122  |
| 1903.239962 | 95.721888  | 2.16031E-06 | 0.004111588 |
| 1903.279962 | 105.926887 | 2.39062E-06 | 0.004550024 |
| 1903.319962 | 102.943436 | 2.32329E-06 | 0.004421964 |
| 1903.359962 | 92.568579  | 2.08914E-06 | 0.003976393 |
| 1903.399962 | 79.92368   | 1.80377E-06 | 0.003433288 |
| 1903.439962 | 80.632842  | 1.81977E-06 | 0.003463825 |
| 1903.479962 | 80.510544  | 1.81701E-06 | 0.003458644 |
| 1903.519962 | 78.403198  | 1.76945E-06 | 0.003368185 |

|             |            |             |             |
|-------------|------------|-------------|-------------|
| 1903.559962 | 78.644956  | 1.77491E-06 | 0.003378642 |
| 1903.599962 | 79.54793   | 1.79529E-06 | 0.003417506 |
| 1903.639962 | 77.530506  | 1.74976E-06 | 0.003330905 |
| 1903.679962 | 65.601072  | 1.48052E-06 | 0.002818445 |
| 1903.719962 | 64.147096  | 1.44771E-06 | 0.002756036 |
| 1903.759962 | 58.478484  | 1.31978E-06 | 0.00251254  |
| 1903.799962 | 57.014129  | 1.28673E-06 | 0.002449676 |
| 1903.839962 | 59.017743  | 1.33195E-06 | 0.002535816 |
| 1903.879962 | 55.377739  | 1.2498E-06  | 0.002379466 |
| 1903.919962 | 47.354184  | 1.06872E-06 | 0.002034753 |
| 1903.959962 | 41.658326  | 9.4017E-07  | 0.001790047 |
| 1903.999962 | 42.940038  | 9.69097E-07 | 0.00184516  |
| 1904.039962 | 58.527805  | 1.32089E-06 | 0.002515029 |
| 1904.079962 | 74.110882  | 1.67258E-06 | 0.003184725 |
| 1904.119962 | 73.822761  | 1.66608E-06 | 0.00317241  |
| 1904.159962 | 70.351103  | 1.58773E-06 | 0.003023285 |
| 1904.199962 | 67.243631  | 1.5176E-06  | 0.002889805 |
| 1904.239962 | 69.623408  | 1.5713E-06  | 0.002992139 |
| 1904.279962 | 80.38417   | 1.81416E-06 | 0.003454666 |
| 1904.319962 | 89.757016  | 2.02569E-06 | 0.003857563 |
| 1904.359962 | 91.782402  | 2.0714E-06  | 0.003944693 |
| 1904.399962 | 88.454713  | 1.9963E-06  | 0.003801753 |
| 1904.439962 | 93.718645  | 2.1151E-06  | 0.00402808  |
| 1904.479962 | 81.5136    | 1.83965E-06 | 0.003503574 |
| 1904.519962 | 69.138254  | 1.56035E-06 | 0.002971726 |
| 1904.559962 | 68.979967  | 1.55678E-06 | 0.002964984 |
| 1904.599962 | 63.156775  | 1.42536E-06 | 0.002714741 |
| 1904.639962 | 58.307358  | 1.31592E-06 | 0.002506346 |
| 1904.679962 | 67.055641  | 1.51335E-06 | 0.002882452 |
| 1904.719962 | 70.407394  | 1.589E-06   | 0.003026594 |
| 1904.759962 | 66.416179  | 1.49892E-06 | 0.002855084 |
| 1904.799962 | 65.21198   | 1.47174E-06 | 0.002803377 |
| 1904.839962 | 55.411836  | 1.25057E-06 | 0.002382132 |
| 1904.879962 | 53.739054  | 1.21282E-06 | 0.002310268 |
| 1904.919962 | 65.086804  | 1.46892E-06 | 0.002798172 |
| 1904.959962 | 81.950515  | 1.84951E-06 | 0.003523241 |
| 1904.999962 | 96.626636  | 2.18073E-06 | 0.004154288 |
| 1905.039962 | 94.880174  | 2.14131E-06 | 0.004079288 |
| 1905.079962 | 82.996018  | 1.8731E-06  | 0.003568414 |
| 1905.119962 | 69.547931  | 1.5696E-06  | 0.002990276 |
| 1905.159962 | 71.067464  | 1.60389E-06 | 0.003055674 |
| 1905.199962 | 75.337463  | 1.70026E-06 | 0.003239338 |
| 1905.239962 | 69.484421  | 1.56817E-06 | 0.002987734 |
| 1905.279962 | 80.90571   | 1.82593E-06 | 0.003478906 |
| 1905.319962 | 108.908635 | 2.45792E-06 | 0.004683117 |
| 1905.359962 | 116.038431 | 2.61883E-06 | 0.004989806 |

|             |            |             |             |
|-------------|------------|-------------|-------------|
| 1905.399962 | 102.861308 | 2.32144E-06 | 0.004423265 |
| 1905.439962 | 91.82579   | 2.07238E-06 | 0.003948796 |
| 1905.479962 | 69.535149  | 1.56931E-06 | 0.002990292 |
| 1905.519962 | 62.669946  | 1.41437E-06 | 0.002695117 |
| 1905.559962 | 70.068979  | 1.58136E-06 | 0.003013375 |
| 1905.599962 | 66.816107  | 1.50795E-06 | 0.002873543 |
| 1905.639962 | 69.775497  | 1.57474E-06 | 0.003000879 |
| 1905.679962 | 74.695499  | 1.68577E-06 | 0.003212545 |
| 1905.719962 | 67.353731  | 1.52008E-06 | 0.002896847 |
| 1905.759962 | 47.658717  | 1.07559E-06 | 0.002049818 |
| 1905.799962 | 42.017204  | 9.4827E-07  | 0.001807212 |
| 1905.839962 | 53.846592  | 1.21524E-06 | 0.002316058 |
| 1905.879962 | 60.863633  | 1.37361E-06 | 0.002617931 |
| 1905.919962 | 70.33797   | 1.58743E-06 | 0.003025515 |
| 1905.959962 | 83.345481  | 1.88099E-06 | 0.003585094 |
| 1905.999962 | 79.379684  | 1.79149E-06 | 0.003414578 |
| 1906.039962 | 83.184137  | 1.87735E-06 | 0.003578304 |
| 1906.079962 | 91.943531  | 2.07504E-06 | 0.003955187 |
| 1906.119962 | 84.016319  | 1.89613E-06 | 0.003614254 |
| 1906.159962 | 72.674015  | 1.64015E-06 | 0.003126391 |
| 1906.199962 | 63.095048  | 1.42397E-06 | 0.002714367 |
| 1906.239962 | 63.994413  | 1.44426E-06 | 0.002753115 |
| 1906.279962 | 66.431929  | 1.49928E-06 | 0.00285804  |
| 1906.319962 | 82.122314  | 1.85339E-06 | 0.003533147 |
| 1906.359962 | 89.199315  | 2.0131E-06  | 0.003837701 |
| 1906.399962 | 80.108924  | 1.80795E-06 | 0.00344667  |
| 1906.439962 | 77.260124  | 1.74365E-06 | 0.00332417  |
| 1906.479962 | 67.613259  | 1.52594E-06 | 0.002909168 |
| 1906.519962 | 63.298582  | 1.42856E-06 | 0.00272358  |
| 1906.559962 | 64.179709  | 1.44845E-06 | 0.00276155  |
| 1906.599962 | 63.446353  | 1.4319E-06  | 0.002730053 |
| 1906.639962 | 71.199798  | 1.60688E-06 | 0.003063742 |
| 1906.679962 | 72.402155  | 1.63402E-06 | 0.003115545 |
| 1906.719962 | 64.662586  | 1.45934E-06 | 0.002782561 |
| 1906.759962 | 58.036381  | 1.3098E-06  | 0.002497475 |
| 1906.799962 | 61.653858  | 1.39144E-06 | 0.002653201 |
| 1906.839962 | 68.277195  | 1.54092E-06 | 0.00293829  |
| 1906.879962 | 70.214376  | 1.58464E-06 | 0.00302172  |
| 1906.919962 | 69.669777  | 1.57235E-06 | 0.002998345 |
| 1906.959962 | 67.39756   | 1.52107E-06 | 0.002900618 |
| 1906.999962 | 61.464005  | 1.38716E-06 | 0.002645308 |
| 1907.039962 | 61.510984  | 1.38822E-06 | 0.002647386 |
| 1907.079962 | 69.736471  | 1.57386E-06 | 0.003001467 |
| 1907.119962 | 86.358196  | 1.94898E-06 | 0.003716947 |
| 1907.159962 | 77.041163  | 1.73871E-06 | 0.003316001 |
| 1907.199962 | 68.307844  | 1.54161E-06 | 0.002940164 |

|             |           |             |             |
|-------------|-----------|-------------|-------------|
| 1907.239962 | 77.378652 | 1.74633E-06 | 0.003330667 |
| 1907.279962 | 86.730674 | 1.95739E-06 | 0.003733292 |
| 1907.319962 | 81.527893 | 1.83997E-06 | 0.003509413 |
| 1907.359962 | 90.694326 | 2.04684E-06 | 0.003904069 |
| 1907.399962 | 97.832697 | 2.20795E-06 | 0.004211439 |
| 1907.439962 | 97.66817  | 2.20423E-06 | 0.004204445 |
| 1907.479962 | 81.177095 | 1.83205E-06 | 0.003494606 |
| 1907.519962 | 64.392852 | 1.45326E-06 | 0.002772117 |
| 1907.559962 | 60.658201 | 1.36897E-06 | 0.002611394 |
| 1907.599962 | 69.319143 | 1.56444E-06 | 0.002984319 |
| 1907.639962 | 84.368441 | 1.90408E-06 | 0.003632296 |
| 1907.679962 | 83.012142 | 1.87347E-06 | 0.003573978 |
| 1907.719962 | 72.507677 | 1.6364E-06  | 0.003121788 |
| 1907.759962 | 74.256631 | 1.67587E-06 | 0.003197155 |
| 1907.799962 | 65.80952  | 1.48523E-06 | 0.00283352  |
| 1907.839962 | 60.318998 | 1.36132E-06 | 0.002597173 |
| 1907.879962 | 60.122466 | 1.35688E-06 | 0.002588765 |
| 1907.919962 | 57.536337 | 1.29851E-06 | 0.002477463 |
| 1907.959962 | 65.752997 | 1.48395E-06 | 0.002831324 |
| 1907.999962 | 68.568395 | 1.54749E-06 | 0.002952617 |
| 1908.039962 | 68.710847 | 1.55071E-06 | 0.002958813 |
| 1908.079962 | 63.351238 | 1.42975E-06 | 0.002728076 |
| 1908.119962 | 63.732666 | 1.43836E-06 | 0.002744559 |
| 1908.159962 | 63.519565 | 1.43355E-06 | 0.002735439 |
| 1908.199962 | 64.275241 | 1.4506E-06  | 0.00276804  |
| 1908.239962 | 68.067151 | 1.53618E-06 | 0.002931402 |
| 1908.279962 | 63.882119 | 1.44173E-06 | 0.002751225 |
| 1908.319962 | 56.047326 | 1.26491E-06 | 0.002413853 |
| 1908.359962 | 57.754285 | 1.30343E-06 | 0.002487421 |
| 1908.399962 | 86.365401 | 1.94915E-06 | 0.003719752 |
| 1908.439962 | 95.100699 | 2.14629E-06 | 0.004096066 |
| 1908.479962 | 77.811824 | 1.7561E-06  | 0.00335149  |
| 1908.519962 | 64.729516 | 1.46086E-06 | 0.002788071 |
| 1908.559962 | 67.587923 | 1.52537E-06 | 0.002911251 |
| 1908.599962 | 74.212732 | 1.67488E-06 | 0.003196672 |
| 1908.639962 | 68.005713 | 1.53479E-06 | 0.00292937  |
| 1908.679962 | 54.792898 | 1.2366E-06  | 0.002360272 |
| 1908.719962 | 49.368658 | 1.11418E-06 | 0.002126661 |
| 1908.759962 | 58.683969 | 1.32442E-06 | 0.002527991 |
| 1908.799962 | 67.540093 | 1.52429E-06 | 0.002909557 |
| 1908.839962 | 61.730211 | 1.39316E-06 | 0.002659329 |
| 1908.879962 | 57.039135 | 1.28729E-06 | 0.002457289 |
| 1908.919962 | 56.17232  | 1.26773E-06 | 0.002419997 |
| 1908.959962 | 57.583874 | 1.29959E-06 | 0.002480861 |
| 1908.999962 | 58.516424 | 1.32063E-06 | 0.002521091 |
| 1909.039962 | 50.45936  | 1.1388E-06  | 0.00217401  |

|             |            |             |             |
|-------------|------------|-------------|-------------|
| 1909.079962 | 51.151825  | 1.15443E-06 | 0.00220389  |
| 1909.119962 | 66.825815  | 1.50817E-06 | 0.002879269 |
| 1909.159962 | 79.02736   | 1.78354E-06 | 0.003405058 |
| 1909.199962 | 74.15059   | 1.67348E-06 | 0.003194999 |
| 1909.239962 | 70.485062  | 1.59075E-06 | 0.003037123 |
| 1909.279962 | 73.824992  | 1.66613E-06 | 0.003181103 |
| 1909.319962 | 89.824899  | 2.02722E-06 | 0.003870617 |
| 1909.359962 | 87.17125   | 1.96733E-06 | 0.003756348 |
| 1909.399962 | 66.305694  | 1.49643E-06 | 0.002857278 |
| 1909.439962 | 47.621117  | 1.07474E-06 | 0.002052156 |
| 1909.479962 | 45.665357  | 1.0306E-06  | 0.001967917 |
| 1909.519962 | 57.811362  | 1.30472E-06 | 0.002491393 |
| 1909.559962 | 69.007063  | 1.55739E-06 | 0.002973936 |
| 1909.599962 | 69.860109  | 1.57665E-06 | 0.003010762 |
| 1909.639962 | 73.217637  | 1.65242E-06 | 0.003155527 |
| 1909.679962 | 71.163586  | 1.60606E-06 | 0.003067066 |
| 1909.719962 | 72.193246  | 1.6293E-06  | 0.003111509 |
| 1909.759962 | 71.410614  | 1.61164E-06 | 0.003077842 |
| 1909.799962 | 62.6238    | 1.41333E-06 | 0.002699181 |
| 1909.839962 | 64.160206  | 1.44801E-06 | 0.002765461 |
| 1909.879962 | 65.952426  | 1.48845E-06 | 0.002842769 |
| 1909.919962 | 59.70307   | 1.34742E-06 | 0.002573455 |
| 1909.959962 | 63.711579  | 1.43788E-06 | 0.002746296 |
| 1909.999962 | 73.63135   | 1.66176E-06 | 0.003173956 |
| 1910.039962 | 74.062733  | 1.67149E-06 | 0.003192618 |
| 1910.079962 | 72.907359  | 1.64542E-06 | 0.003142879 |
| 1910.119962 | 62.621298  | 1.41328E-06 | 0.002699526 |
| 1910.159962 | 58.489803  | 1.32003E-06 | 0.002521475 |
| 1910.199962 | 62.813572  | 1.41761E-06 | 0.002707928 |
| 1910.239962 | 73.386972  | 1.65624E-06 | 0.003163819 |
| 1910.279962 | 84.455945  | 1.90605E-06 | 0.003641095 |
| 1910.319962 | 89.125274  | 2.01143E-06 | 0.003842481 |
| 1910.359962 | 97.848289  | 2.2083E-06  | 0.004218647 |
| 1910.399962 | 101.814067 | 2.2978E-06  | 0.00438972  |
| 1910.439962 | 104.724446 | 2.36348E-06 | 0.004515296 |
| 1910.479962 | 87.924189  | 1.98433E-06 | 0.003791016 |
| 1910.519962 | 75.063928  | 1.69409E-06 | 0.00323659  |
| 1910.559962 | 63.16764   | 1.42561E-06 | 0.002723705 |
| 1910.599962 | 54.48116   | 1.22956E-06 | 0.002349205 |
| 1910.639962 | 65.935957  | 1.48808E-06 | 0.00284319  |
| 1910.679962 | 61.741538  | 1.39342E-06 | 0.002662381 |
| 1910.719962 | 48.329687  | 1.09073E-06 | 0.002084087 |
| 1910.759962 | 48.852247  | 1.10253E-06 | 0.002106665 |
| 1910.799962 | 67.504705  | 1.52349E-06 | 0.002911079 |
| 1910.839962 | 77.64925   | 1.75244E-06 | 0.003348624 |
| 1910.879962 | 80.303373  | 1.81234E-06 | 0.003463155 |

|             |            |             |             |
|-------------|------------|-------------|-------------|
| 1910.919962 | 68.291228  | 1.54124E-06 | 0.002945182 |
| 1910.959962 | 60.63321   | 1.36841E-06 | 0.002614971 |
| 1910.999962 | 62.625107  | 1.41336E-06 | 0.002700934 |
| 1911.039962 | 72.64026   | 1.63939E-06 | 0.003132939 |
| 1911.079962 | 71.383192  | 1.61102E-06 | 0.003078787 |
| 1911.119962 | 58.522108  | 1.32076E-06 | 0.002524136 |
| 1911.159962 | 49.865083  | 1.12539E-06 | 0.002150792 |
| 1911.199962 | 48.689519  | 1.09885E-06 | 0.002100131 |
| 1911.239962 | 57.017819  | 1.28681E-06 | 0.002459408 |
| 1911.279962 | 72.91316   | 1.64555E-06 | 0.003145104 |
| 1911.319962 | 81.675849  | 1.84331E-06 | 0.003523155 |
| 1911.359962 | 84.156425  | 1.89929E-06 | 0.003630233 |
| 1911.399962 | 88.685028  | 2.0015E-06  | 0.003825662 |
| 1911.439962 | 78.16428   | 1.76406E-06 | 0.003371893 |
| 1911.479962 | 73.855095  | 1.66681E-06 | 0.003186067 |
| 1911.519962 | 71.886437  | 1.62238E-06 | 0.003101206 |
| 1911.559962 | 67.319876  | 1.51932E-06 | 0.002904263 |
| 1911.599962 | 68.205645  | 1.53931E-06 | 0.002942538 |
| 1911.639962 | 66.546305  | 1.50186E-06 | 0.002871011 |
| 1911.679962 | 72.529247  | 1.63688E-06 | 0.003129198 |
| 1911.719962 | 73.616897  | 1.66143E-06 | 0.00317619  |
| 1911.759962 | 58.284895  | 1.31541E-06 | 0.002514746 |
| 1911.799962 | 56.912249  | 1.28443E-06 | 0.002455574 |
| 1911.839962 | 49.97136   | 1.12778E-06 | 0.002156143 |
| 1911.879962 | 44.746536  | 1.00987E-06 | 0.001930744 |
| 1911.919962 | 48.204792  | 1.08792E-06 | 0.002080006 |
| 1911.959962 | 64.630124  | 1.45861E-06 | 0.002788808 |
| 1911.999962 | 72.37665   | 1.63344E-06 | 0.003123138 |
| 1912.039962 | 72.497742  | 1.63617E-06 | 0.003128428 |
| 1912.079962 | 69.378329  | 1.56577E-06 | 0.002993882 |
| 1912.119962 | 68.751633  | 1.55163E-06 | 0.0029669   |
| 1912.159962 | 74.00904   | 1.67028E-06 | 0.003193844 |
| 1912.199962 | 83.433369  | 1.88297E-06 | 0.003600625 |
| 1912.239962 | 85.520771  | 1.93008E-06 | 0.003690785 |
| 1912.279962 | 85.165937  | 1.92208E-06 | 0.003675549 |
| 1912.319962 | 88.188618  | 1.99029E-06 | 0.003806079 |
| 1912.359962 | 94.146742  | 2.12476E-06 | 0.004063308 |
| 1912.399962 | 77.68017   | 1.75313E-06 | 0.003352692 |
| 1912.439962 | 61.358587  | 1.38478E-06 | 0.002648304 |
| 1912.479962 | 72.192462  | 1.62928E-06 | 0.003115972 |
| 1912.519962 | 77.641133  | 1.75225E-06 | 0.003351217 |
| 1912.559962 | 69.362875  | 1.56542E-06 | 0.002993966 |
| 1912.599962 | 78.596819  | 1.77382E-06 | 0.003392609 |
| 1912.639962 | 100.729288 | 2.27332E-06 | 0.004348042 |
| 1912.679962 | 88.831587  | 2.00481E-06 | 0.003834551 |
| 1912.719962 | 73.271608  | 1.65364E-06 | 0.003162947 |

|             |           |             |             |
|-------------|-----------|-------------|-------------|
| 1912.759962 | 63.648509 | 1.43646E-06 | 0.0027476   |
| 1912.799962 | 59.43326  | 1.34133E-06 | 0.002565688 |
| 1912.839962 | 67.427712 | 1.52175E-06 | 0.002910863 |
| 1912.879962 | 67.457518 | 1.52242E-06 | 0.002912211 |
| 1912.919962 | 63.410417 | 1.43108E-06 | 0.002737551 |
| 1912.959962 | 65.191258 | 1.47128E-06 | 0.002814492 |
| 1912.999962 | 69.004215 | 1.55733E-06 | 0.00297917  |
| 1913.039962 | 63.708382 | 1.43781E-06 | 0.002750587 |
| 1913.079962 | 54.17788  | 1.22272E-06 | 0.00233916  |
| 1913.119962 | 52.480974 | 1.18442E-06 | 0.002265942 |
| 1913.159962 | 69.11259  | 1.55977E-06 | 0.002984099 |
| 1913.199962 | 75.343375 | 1.7004E-06  | 0.003253196 |
| 1913.239962 | 61.465711 | 1.3872E-06  | 0.002654038 |
| 1913.279962 | 57.805937 | 1.3046E-06  | 0.002496064 |
| 1913.319962 | 61.320879 | 1.38393E-06 | 0.002647895 |
| 1913.359962 | 52.696317 | 1.18928E-06 | 0.002275525 |
| 1913.399962 | 49.904352 | 1.12627E-06 | 0.002155008 |
| 1913.439962 | 60.015023 | 1.35446E-06 | 0.002591669 |
| 1913.479962 | 61.699478 | 1.39247E-06 | 0.002664466 |
| 1913.519962 | 60.819129 | 1.3726E-06  | 0.002626503 |
| 1913.559962 | 69.037812 | 1.55809E-06 | 0.002981493 |
| 1913.599962 | 77.250698 | 1.74344E-06 | 0.003336248 |
| 1913.639962 | 67.786413 | 1.52984E-06 | 0.002927572 |
| 1913.679962 | 57.415835 | 1.2958E-06  | 0.002479738 |
| 1913.719962 | 51.947933 | 1.17239E-06 | 0.002243631 |
| 1913.759962 | 59.261213 | 1.33744E-06 | 0.002559545 |
| 1913.799962 | 71.161437 | 1.60601E-06 | 0.003073591 |
| 1913.839962 | 70.647625 | 1.59442E-06 | 0.003051462 |
| 1913.879962 | 65.612775 | 1.48079E-06 | 0.002834052 |
| 1913.919962 | 75.886419 | 1.71265E-06 | 0.003277877 |
| 1913.959962 | 74.18306  | 1.67421E-06 | 0.003204368 |
| 1913.999962 | 71.841565 | 1.62136E-06 | 0.003103291 |
| 1914.039962 | 83.071137 | 1.8748E-06  | 0.003588442 |
| 1914.079962 | 88.192127 | 1.99037E-06 | 0.003809734 |
| 1914.119962 | 83.704819 | 1.8891E-06  | 0.003615966 |
| 1914.159962 | 86.33593  | 1.94848E-06 | 0.003729706 |
| 1914.199962 | 84.235741 | 1.90108E-06 | 0.003639054 |
| 1914.239962 | 81.447593 | 1.83816E-06 | 0.003518677 |
| 1914.279962 | 80.376992 | 1.814E-06   | 0.003472498 |
| 1914.319962 | 84.872092 | 1.91544E-06 | 0.003666774 |
| 1914.359962 | 83.682516 | 1.8886E-06  | 0.003615456 |
| 1914.399962 | 70.9911   | 1.60217E-06 | 0.003067195 |
| 1914.439962 | 56.172633 | 1.26774E-06 | 0.002427008 |
| 1914.479962 | 49.962941 | 1.12759E-06 | 0.002158756 |
| 1914.519962 | 58.913395 | 1.32959E-06 | 0.002545533 |
| 1914.559962 | 60.924421 | 1.37498E-06 | 0.00263248  |



|             |           |             |             |
|-------------|-----------|-------------|-------------|
| 1914.599962 | 62.007094 | 1.39941E-06 | 0.002679317 |
| 1914.639962 | 62.234055 | 1.40454E-06 | 0.002689181 |
| 1914.679962 | 62.140141 | 1.40242E-06 | 0.002685179 |
| 1914.719962 | 67.082223 | 1.51395E-06 | 0.002898795 |
| 1914.759962 | 52.698864 | 1.18934E-06 | 0.002277301 |
| 1914.799962 | 44.89601  | 1.01324E-06 | 0.001940153 |
| 1914.839962 | 54.279145 | 1.225E-06   | 0.002345688 |
| 1914.879962 | 63.938189 | 1.443E-06   | 0.002763164 |
| 1914.919962 | 79.188994 | 1.78719E-06 | 0.003422317 |
| 1914.959962 | 75.818025 | 1.71111E-06 | 0.003276702 |
| 1914.999962 | 65.120051 | 1.46967E-06 | 0.002814416 |
| 1915.039962 | 65.214062 | 1.47179E-06 | 0.002818538 |
| 1915.079962 | 66.818745 | 1.50801E-06 | 0.002887952 |
| 1915.119962 | 63.221078 | 1.42681E-06 | 0.002732516 |
| 1915.159962 | 59.394115 | 1.34044E-06 | 0.002567162 |
| 1915.199962 | 62.082216 | 1.40111E-06 | 0.002683404 |
| 1915.239962 | 70.387901 | 1.58856E-06 | 0.003042468 |
| 1915.279962 | 83.554562 | 1.88571E-06 | 0.003611663 |
| 1915.319962 | 76.786956 | 1.73297E-06 | 0.003319201 |
| 1915.359962 | 54.23214  | 1.22394E-06 | 0.002344293 |
| 1915.399962 | 53.348831 | 1.20401E-06 | 0.002306158 |
| 1915.439962 | 66.726944 | 1.50593E-06 | 0.002884527 |
| 1915.479962 | 70.882845 | 1.59973E-06 | 0.003064245 |
| 1915.519962 | 66.505779 | 1.50094E-06 | 0.002875086 |
| 1915.559962 | 72.877366 | 1.64474E-06 | 0.003150599 |
| 1915.599962 | 66.197645 | 1.49399E-06 | 0.002861885 |
| 1915.639962 | 70.857792 | 1.59916E-06 | 0.003063418 |
| 1915.679962 | 76.467826 | 1.72577E-06 | 0.003306027 |
| 1915.719962 | 70.696134 | 1.59551E-06 | 0.003056557 |
| 1915.759962 | 69.848215 | 1.57638E-06 | 0.00301996  |
| 1915.799962 | 77.982364 | 1.75995E-06 | 0.003371719 |
| 1915.839962 | 85.78043  | 1.93594E-06 | 0.00370896  |
| 1915.879962 | 78.690152 | 1.77593E-06 | 0.003402463 |
| 1915.919962 | 68.809599 | 1.55294E-06 | 0.002975303 |
| 1915.959962 | 58.908347 | 1.32948E-06 | 0.002547229 |
| 1915.999962 | 56.548973 | 1.27623E-06 | 0.00244526  |
| 1916.039962 | 57.550979 | 1.29885E-06 | 0.00248864  |
| 1916.079962 | 72.295202 | 1.6316E-06  | 0.00312628  |
| 1916.119962 | 82.508929 | 1.86211E-06 | 0.003568029 |
| 1916.159962 | 75.875244 | 1.7124E-06  | 0.00328123  |
| 1916.199962 | 68.490326 | 1.54573E-06 | 0.00296193  |
| 1916.239962 | 66.29493  | 1.49618E-06 | 0.002867048 |
| 1916.279962 | 56.273365 | 1.27001E-06 | 0.002433698 |
| 1916.319962 | 53.591785 | 1.20949E-06 | 0.002317774 |
| 1916.359962 | 68.616289 | 1.54857E-06 | 0.002967625 |
| 1916.399962 | 84.550194 | 1.90818E-06 | 0.003656836 |

|             |            |             |             |
|-------------|------------|-------------|-------------|
| 1916.439962 | 69.422721  | 1.56677E-06 | 0.003002629 |
| 1916.479962 | 48.874795  | 1.10304E-06 | 0.002113946 |
| 1916.519962 | 54.100043  | 1.22096E-06 | 0.002339999 |
| 1916.559962 | 75.803504  | 1.71078E-06 | 0.003278811 |
| 1916.599962 | 71.910849  | 1.62293E-06 | 0.003110503 |
| 1916.639962 | 63.316597  | 1.42897E-06 | 0.002738816 |
| 1916.679962 | 60.933418  | 1.37518E-06 | 0.002635784 |
| 1916.719962 | 86.275816  | 1.94712E-06 | 0.003732093 |
| 1916.759962 | 106.818359 | 2.41074E-06 | 0.004620813 |
| 1916.799962 | 97.411094  | 2.19843E-06 | 0.004213956 |
| 1916.839962 | 75.452404  | 1.70286E-06 | 0.003264102 |
| 1916.879962 | 63.00255   | 1.42188E-06 | 0.002725573 |
| 1916.919962 | 59.818449  | 1.35002E-06 | 0.002587879 |
| 1916.959962 | 70.89244   | 1.59994E-06 | 0.003067028 |
| 1916.999962 | 68.304574  | 1.54154E-06 | 0.00295513  |
| 1917.039962 | 52.692407  | 1.18919E-06 | 0.002279733 |
| 1917.079962 | 68.041803  | 1.53561E-06 | 0.002943885 |
| 1917.119962 | 86.771127  | 1.9583E-06  | 0.003754303 |
| 1917.159962 | 84.883826  | 1.91571E-06 | 0.003672722 |
| 1917.199962 | 75.975757  | 1.71467E-06 | 0.00328736  |
| 1917.239962 | 60.800268  | 1.37218E-06 | 0.002630793 |
| 1917.279962 | 66.841664  | 1.50852E-06 | 0.002892261 |
| 1917.319962 | 86.506848  | 1.95234E-06 | 0.003743259 |
| 1917.359962 | 85.653705  | 1.93308E-06 | 0.003706419 |
| 1917.399962 | 92.653393  | 2.09106E-06 | 0.004009395 |
| 1917.439962 | 94.80943   | 2.13972E-06 | 0.004102778 |
| 1917.479962 | 84.073476  | 1.89742E-06 | 0.003638267 |
| 1917.519962 | 64.814049  | 1.46276E-06 | 0.002804877 |
| 1917.559962 | 57.984675  | 1.30863E-06 | 0.002509383 |
| 1917.599962 | 56.098575  | 1.26607E-06 | 0.002427809 |
| 1917.639962 | 49.954199  | 1.1274E-06  | 0.002161941 |
| 1917.679962 | 47.837084  | 1.07962E-06 | 0.002070359 |
| 1917.719962 | 47.269126  | 1.0668E-06  | 0.00204582  |
| 1917.759962 | 64.668035  | 1.45947E-06 | 0.002798908 |
| 1917.799962 | 70.107109  | 1.58222E-06 | 0.003034381 |
| 1917.839962 | 66.193917  | 1.4939E-06  | 0.00286507  |
| 1917.879962 | 72.247157  | 1.63052E-06 | 0.003127137 |
| 1917.919962 | 77.447414  | 1.74788E-06 | 0.003352294 |
| 1917.959962 | 67.666556  | 1.52714E-06 | 0.002928993 |
| 1917.999962 | 61.650889  | 1.39137E-06 | 0.002668657 |
| 1918.039962 | 63.811677  | 1.44014E-06 | 0.002762247 |
| 1918.079962 | 64.847098  | 1.46351E-06 | 0.002807127 |
| 1918.119962 | 67.743163  | 1.52887E-06 | 0.002932554 |
| 1918.159962 | 64.918274  | 1.46512E-06 | 0.002810325 |
| 1918.199962 | 75.99505   | 1.7151E-06  | 0.003289909 |
| 1918.239962 | 83.531777  | 1.8852E-06  | 0.003616258 |

|             |            |             |             |
|-------------|------------|-------------|-------------|
| 1918.279962 | 91.829873  | 2.07247E-06 | 0.003975582 |
| 1918.319962 | 96.832337  | 2.18537E-06 | 0.004192241 |
| 1918.359962 | 81.002756  | 1.82812E-06 | 0.003506991 |
| 1918.399962 | 66.984485  | 1.51175E-06 | 0.002900134 |
| 1918.439962 | 64.258207  | 1.45022E-06 | 0.002782157 |
| 1918.479962 | 66.857428  | 1.50888E-06 | 0.002894754 |
| 1918.519962 | 64.875535  | 1.46415E-06 | 0.002809002 |
| 1918.559962 | 63.74226   | 1.43857E-06 | 0.002759991 |
| 1918.599962 | 59.410069  | 1.3408E-06  | 0.002572464 |
| 1918.639962 | 56.873062  | 1.28355E-06 | 0.002462662 |
| 1918.679962 | 54.424456  | 1.22828E-06 | 0.002356684 |
| 1918.719962 | 45.510186  | 1.0271E-06  | 0.00197072  |
| 1918.759962 | 52.592007  | 1.18693E-06 | 0.002277431 |
| 1918.799962 | 66.897618  | 1.50979E-06 | 0.002896977 |
| 1918.839962 | 77.479801  | 1.74861E-06 | 0.003355305 |
| 1918.879962 | 79.793477  | 1.80083E-06 | 0.003455572 |
| 1918.919962 | 80.626582  | 1.81963E-06 | 0.003491724 |
| 1918.959962 | 73.71929   | 1.66374E-06 | 0.003192654 |
| 1918.999962 | 69.067679  | 1.55876E-06 | 0.002991263 |
| 1919.039962 | 71.992462  | 1.62477E-06 | 0.003117998 |
| 1919.079962 | 66.917524  | 1.51024E-06 | 0.002898262 |
| 1919.119962 | 61.602577  | 1.39028E-06 | 0.002668122 |
| 1919.159962 | 61.912357  | 1.39728E-06 | 0.002681596 |
| 1919.199962 | 76.293778  | 1.72184E-06 | 0.003304564 |
| 1919.239962 | 101.233876 | 2.28471E-06 | 0.004384902 |
| 1919.279962 | 114.478163 | 2.58361E-06 | 0.004958676 |
| 1919.319962 | 107.845032 | 2.43391E-06 | 0.004671456 |
| 1919.359962 | 95.437463  | 2.15389E-06 | 0.004134091 |
| 1919.399962 | 87.226184  | 1.96857E-06 | 0.00377848  |
| 1919.439962 | 73.698925  | 1.66328E-06 | 0.00319257  |
| 1919.479962 | 64.969439  | 1.46627E-06 | 0.002814475 |
| 1919.519962 | 70.065286  | 1.58128E-06 | 0.003035291 |
| 1919.559962 | 77.260601  | 1.74366E-06 | 0.003347068 |
| 1919.599962 | 83.479776  | 1.88402E-06 | 0.003616569 |
| 1919.639962 | 71.673679  | 1.61758E-06 | 0.003105162 |
| 1919.679962 | 73.975865  | 1.66953E-06 | 0.003204968 |
| 1919.719962 | 67.009139  | 1.5123E-06  | 0.002903198 |
| 1919.759962 | 66.343351  | 1.49728E-06 | 0.002874412 |
| 1919.799962 | 70.049159  | 1.58091E-06 | 0.003035035 |
| 1919.839962 | 67.912665  | 1.53269E-06 | 0.002942528 |
| 1919.879962 | 56.528793  | 1.27578E-06 | 0.002449337 |
| 1919.919962 | 63.339556  | 1.42949E-06 | 0.002744498 |
| 1919.959962 | 73.70879   | 1.6635E-06  | 0.003193862 |
| 1919.999962 | 77.931831  | 1.75881E-06 | 0.003376921 |
| 1920.039962 | 79.887918  | 1.80296E-06 | 0.003461753 |
| 1920.079962 | 84.053004  | 1.89696E-06 | 0.003642313 |

|             |           |             |             |
|-------------|-----------|-------------|-------------|
| 1920.119962 | 80.345432 | 1.81328E-06 | 0.003481724 |
| 1920.159962 | 71.629972 | 1.61659E-06 | 0.003104109 |
| 1920.199962 | 59.680341 | 1.3469E-06  | 0.002586321 |
| 1920.239962 | 57.686299 | 1.3019E-06  | 0.002499959 |
| 1920.279962 | 63.779931 | 1.43942E-06 | 0.002764097 |
| 1920.319962 | 74.89922  | 1.69037E-06 | 0.003246053 |
| 1920.359962 | 67.761338 | 1.52928E-06 | 0.002936766 |
| 1920.399962 | 63.524878 | 1.43367E-06 | 0.002753216 |
| 1920.439962 | 61.442545 | 1.38667E-06 | 0.002663022 |
| 1920.479962 | 65.099493 | 1.4692E-06  | 0.002821579 |
| 1920.519962 | 60.885263 | 1.3741E-06  | 0.002638978 |
| 1920.559962 | 56.215521 | 1.26871E-06 | 0.002436626 |
| 1920.599962 | 64.250239 | 1.45004E-06 | 0.002784944 |
| 1920.639962 | 79.528785 | 1.79485E-06 | 0.003447268 |
| 1920.679962 | 85.253075 | 1.92404E-06 | 0.003695471 |
| 1920.719962 | 80.607206 | 1.81919E-06 | 0.003494159 |
| 1920.759962 | 85.983636 | 1.94053E-06 | 0.003727294 |
| 1920.799962 | 88.4337   | 1.99583E-06 | 0.003833581 |
| 1920.839962 | 86.226555 | 1.94601E-06 | 0.00373798  |
| 1920.879962 | 70.860491 | 1.59922E-06 | 0.003071915 |
| 1920.919962 | 66.205763 | 1.49417E-06 | 0.002870185 |
| 1920.959962 | 77.888295 | 1.75783E-06 | 0.003376722 |
| 1920.999962 | 84.803205 | 1.91389E-06 | 0.003676583 |
| 1921.039962 | 83.411516 | 1.88248E-06 | 0.003616323 |
| 1921.079962 | 71.268875 | 1.60844E-06 | 0.00308994  |
| 1921.119962 | 64.412666 | 1.4537E-06  | 0.00279274  |
| 1921.159962 | 62.319126 | 1.40646E-06 | 0.002702027 |
| 1921.199962 | 72.461565 | 1.63536E-06 | 0.003141847 |
| 1921.239962 | 83.219381 | 1.87815E-06 | 0.003608368 |
| 1921.279962 | 81.236896 | 1.8334E-06  | 0.003522482 |
| 1921.319962 | 81.461346 | 1.83847E-06 | 0.003532287 |
| 1921.359962 | 80.468333 | 1.81606E-06 | 0.003489302 |
| 1921.399962 | 75.788844 | 1.71045E-06 | 0.003286456 |
| 1921.439962 | 68.031916 | 1.53539E-06 | 0.002950151 |
| 1921.479962 | 66.866609 | 1.50909E-06 | 0.002899679 |
| 1921.519962 | 69.367876 | 1.56554E-06 | 0.003008209 |
| 1921.559962 | 78.718308 | 1.77656E-06 | 0.003413771 |
| 1921.599962 | 84.189524 | 1.90004E-06 | 0.003651117 |
| 1921.639962 | 65.084556 | 1.46887E-06 | 0.002822635 |
| 1921.679962 | 59.674278 | 1.34677E-06 | 0.002588052 |
| 1921.719962 | 69.701115 | 1.57306E-06 | 0.003022975 |
| 1921.759962 | 77.35075  | 1.7457E-06  | 0.003354814 |
| 1921.799962 | 75.607673 | 1.70636E-06 | 0.003279282 |
| 1921.839962 | 83.573616 | 1.88614E-06 | 0.003624859 |
| 1921.879962 | 87.44359  | 1.97348E-06 | 0.003792792 |
| 1921.919962 | 71.478636 | 1.61317E-06 | 0.00310039  |

|             |           |             |             |
|-------------|-----------|-------------|-------------|
| 1921.959962 | 55.600178 | 1.25482E-06 | 0.002411711 |
| 1921.999962 | 62.727071 | 1.41566E-06 | 0.002720904 |
| 1922.039962 | 81.600421 | 1.84161E-06 | 0.003539644 |
| 1922.079962 | 93.192862 | 2.10323E-06 | 0.004042582 |
| 1922.119962 | 90.222572 | 2.0362E-06  | 0.003913816 |
| 1922.159962 | 68.514374 | 1.54627E-06 | 0.002972186 |
| 1922.199962 | 50.084708 | 1.13034E-06 | 0.002172744 |
| 1922.239962 | 53.815428 | 1.21454E-06 | 0.002334636 |
| 1922.279962 | 69.661134 | 1.57215E-06 | 0.003022122 |
| 1922.319962 | 70.560759 | 1.59246E-06 | 0.003061214 |
| 1922.359962 | 64.457353 | 1.45471E-06 | 0.002796481 |
| 1922.399962 | 66.68847  | 1.50507E-06 | 0.002893339 |
| 1922.439962 | 62.025706 | 1.39983E-06 | 0.002691096 |
| 1922.479961 | 60.475903 | 1.36486E-06 | 0.00262391  |
| 1922.519961 | 58.626393 | 1.32312E-06 | 0.002543717 |
| 1922.559961 | 53.493694 | 1.20728E-06 | 0.002321065 |
| 1922.599961 | 63.42614  | 1.43144E-06 | 0.002752086 |
| 1922.639961 | 74.724783 | 1.68643E-06 | 0.003242406 |
| 1922.679961 | 72.685889 | 1.64042E-06 | 0.003154001 |
| 1922.719961 | 59.535093 | 1.34362E-06 | 0.002583413 |
| 1922.759961 | 43.83402  | 9.89273E-07 | 0.001902134 |
| 1922.799961 | 41.180574 | 9.29388E-07 | 0.001787028 |
| 1922.839961 | 57.371163 | 1.29479E-06 | 0.002489669 |
| 1922.879961 | 63.587155 | 1.43507E-06 | 0.002759474 |
| 1922.919961 | 48.626758 | 1.09744E-06 | 0.002110286 |
| 1922.959961 | 49.035242 | 1.10666E-06 | 0.002128057 |
| 1922.999961 | 60.357187 | 1.36218E-06 | 0.002619468 |
| 1923.039961 | 57.479578 | 1.29723E-06 | 0.002494633 |
| 1923.079961 | 59.74864  | 1.34844E-06 | 0.002593165 |
| 1923.119961 | 70.532234 | 1.59181E-06 | 0.00306125  |
| 1923.159961 | 73.603347 | 1.66113E-06 | 0.003194609 |
| 1923.199961 | 72.420849 | 1.63444E-06 | 0.00314335  |
| 1923.239961 | 84.428938 | 1.90544E-06 | 0.003664625 |
| 1923.279961 | 86.871635 | 1.96057E-06 | 0.003770728 |
| 1923.319961 | 84.016709 | 1.89614E-06 | 0.003646884 |
| 1923.359961 | 71.895392 | 1.62258E-06 | 0.003120803 |
| 1923.399961 | 63.717025 | 1.438E-06   | 0.002765858 |
| 1923.439961 | 63.401078 | 1.43087E-06 | 0.0027522   |
| 1923.479961 | 60.952318 | 1.37561E-06 | 0.002645956 |
| 1923.519961 | 59.329284 | 1.33898E-06 | 0.002575553 |
| 1923.559961 | 66.585159 | 1.50273E-06 | 0.0028906   |
| 1923.599961 | 77.406656 | 1.74696E-06 | 0.003360453 |
| 1923.639961 | 67.876365 | 1.53188E-06 | 0.002946776 |
| 1923.679961 | 62.229129 | 1.40442E-06 | 0.002701664 |
| 1923.719961 | 49.205496 | 1.1105E-06  | 0.00213629  |
| 1923.759961 | 40.480439 | 9.13587E-07 | 0.001757522 |

|             |           |             |             |
|-------------|-----------|-------------|-------------|
| 1923.799961 | 45.493997 | 1.02674E-06 | 0.001975235 |
| 1923.839961 | 55.46588  | 1.25179E-06 | 0.002408239 |
| 1923.879961 | 59.680777 | 1.34691E-06 | 0.002591297 |
| 1923.919961 | 63.403993 | 1.43094E-06 | 0.002753014 |
| 1923.959961 | 64.918055 | 1.46511E-06 | 0.002818813 |
| 1923.999961 | 65.996284 | 1.48944E-06 | 0.002865691 |
| 1924.039961 | 74.398411 | 1.67907E-06 | 0.003230595 |
| 1924.079961 | 71.597645 | 1.61586E-06 | 0.003109042 |
| 1924.119961 | 63.48108  | 1.43268E-06 | 0.002756647 |
| 1924.159961 | 73.417898 | 1.65694E-06 | 0.003188217 |
| 1924.199961 | 86.774436 | 1.95838E-06 | 0.003768311 |
| 1924.239961 | 90.944131 | 2.05248E-06 | 0.003949469 |
| 1924.279961 | 78.571237 | 1.77324E-06 | 0.003412217 |
| 1924.319961 | 69.902605 | 1.5776E-06  | 0.003035816 |
| 1924.359961 | 70.388043 | 1.58856E-06 | 0.003056961 |
| 1924.399961 | 68.193865 | 1.53904E-06 | 0.00296173  |
| 1924.439961 | 76.354601 | 1.72322E-06 | 0.003316228 |
| 1924.479961 | 76.194847 | 1.71961E-06 | 0.003309358 |
| 1924.519961 | 58.162127 | 1.31264E-06 | 0.002526198 |
| 1924.559961 | 44.40567  | 1.00217E-06 | 0.001928744 |
| 1924.599961 | 54.367298 | 1.22699E-06 | 0.002361473 |
| 1924.639961 | 58.916369 | 1.32966E-06 | 0.002559118 |
| 1924.679961 | 51.508978 | 1.16249E-06 | 0.002237413 |
| 1924.719961 | 64.412667 | 1.4537E-06  | 0.002797973 |
| 1924.759961 | 73.075266 | 1.64921E-06 | 0.003174328 |
| 1924.799961 | 71.042946 | 1.60334E-06 | 0.003086109 |
| 1924.839961 | 66.619733 | 1.50351E-06 | 0.002894025 |
| 1924.879961 | 64.469979 | 1.455E-06   | 0.002800696 |
| 1924.919961 | 63.354406 | 1.42982E-06 | 0.00275229  |
| 1924.959961 | 61.827697 | 1.39537E-06 | 0.002686022 |
| 1924.999961 | 60.33417  | 1.36166E-06 | 0.002621192 |
| 1925.039961 | 59.932237 | 1.35259E-06 | 0.002603784 |
| 1925.079961 | 60.465831 | 1.36463E-06 | 0.002627021 |
| 1925.119961 | 56.602798 | 1.27745E-06 | 0.002459237 |
| 1925.159961 | 50.560719 | 1.14109E-06 | 0.002196771 |
| 1925.199961 | 57.475688 | 1.29715E-06 | 0.002497266 |
| 1925.239961 | 65.115698 | 1.46957E-06 | 0.002829276 |
| 1925.279961 | 68.699632 | 1.55046E-06 | 0.00298506  |
| 1925.319961 | 70.912283 | 1.60039E-06 | 0.003081266 |
| 1925.359961 | 65.752987 | 1.48395E-06 | 0.002857144 |
| 1925.399961 | 53.500412 | 1.20743E-06 | 0.002324785 |
| 1925.439961 | 48.099201 | 1.08553E-06 | 0.002090127 |
| 1925.479961 | 47.068013 | 1.06226E-06 | 0.002045359 |
| 1925.519961 | 54.253802 | 1.22443E-06 | 0.00235767  |
| 1925.559961 | 67.473721 | 1.52279E-06 | 0.002932219 |
| 1925.599961 | 72.735175 | 1.64153E-06 | 0.003160933 |

|             |           |             |             |
|-------------|-----------|-------------|-------------|
| 1925.639961 | 56.996759 | 1.28634E-06 | 0.002477023 |
| 1925.679961 | 44.844369 | 1.01207E-06 | 0.001948932 |
| 1925.719961 | 44.696042 | 1.00873E-06 | 0.001942527 |
| 1925.759961 | 52.282545 | 1.17994E-06 | 0.002272289 |
| 1925.799961 | 52.8721   | 1.19325E-06 | 0.00229796  |
| 1925.839961 | 56.322382 | 1.27112E-06 | 0.002447969 |
| 1925.879961 | 64.647908 | 1.45901E-06 | 0.002809884 |
| 1925.919961 | 58.187039 | 1.3132E-06  | 0.002529119 |
| 1925.959961 | 54.644398 | 1.23325E-06 | 0.002375186 |
| 1925.999961 | 51.682469 | 1.1664E-06  | 0.002246489 |
| 1926.039961 | 51.668539 | 1.16609E-06 | 0.00224593  |
| 1926.079961 | 67.950139 | 1.53354E-06 | 0.002953721 |
| 1926.119961 | 77.883003 | 1.75771E-06 | 0.003385562 |
| 1926.159961 | 60.782915 | 1.37179E-06 | 0.002642279 |
| 1926.199961 | 51.852318 | 1.17023E-06 | 0.002254106 |
| 1926.239961 | 51.554964 | 1.16352E-06 | 0.002241226 |
| 1926.279961 | 53.789408 | 1.21395E-06 | 0.002338411 |
| 1926.319961 | 56.144868 | 1.26711E-06 | 0.002440862 |
| 1926.359961 | 67.224807 | 1.51717E-06 | 0.002922616 |
| 1926.399961 | 81.505654 | 1.83947E-06 | 0.003543553 |
| 1926.439961 | 80.426003 | 1.8151E-06  | 0.003496687 |
| 1926.479961 | 72.216425 | 1.62982E-06 | 0.003139824 |
| 1926.519961 | 58.057788 | 1.31028E-06 | 0.002524287 |
| 1926.559961 | 55.823573 | 1.25986E-06 | 0.002427196 |
| 1926.599961 | 60.800419 | 1.37218E-06 | 0.002643643 |
| 1926.639961 | 67.619907 | 1.52609E-06 | 0.00294022  |
| 1926.679961 | 62.528361 | 1.41118E-06 | 0.002718888 |
| 1926.719961 | 58.811822 | 1.3273E-06  | 0.002557337 |
| 1926.759961 | 74.612115 | 1.68389E-06 | 0.003244455 |
| 1926.799961 | 91.932259 | 2.07478E-06 | 0.003997692 |
| 1926.839961 | 82.402493 | 1.85971E-06 | 0.003583363 |
| 1926.879961 | 65.184908 | 1.47113E-06 | 0.002834696 |
| 1926.919961 | 69.529285 | 1.56918E-06 | 0.003023683 |
| 1926.959961 | 77.671538 | 1.75294E-06 | 0.003377842 |
| 1926.999961 | 75.326389 | 1.70001E-06 | 0.003275922 |
| 1927.039961 | 73.948918 | 1.66892E-06 | 0.003216083 |
| 1927.079961 | 65.33246  | 1.47446E-06 | 0.002841407 |
| 1927.119961 | 54.00574  | 1.21883E-06 | 0.00234884  |
| 1927.159961 | 54.051047 | 1.21986E-06 | 0.002350859 |
| 1927.199961 | 57.323082 | 1.2937E-06  | 0.002493223 |
| 1927.239961 | 65.662439 | 1.48191E-06 | 0.002855996 |
| 1927.279961 | 68.758894 | 1.55179E-06 | 0.002990739 |
| 1927.319961 | 73.715004 | 1.66364E-06 | 0.003206376 |
| 1927.359961 | 72.946006 | 1.64629E-06 | 0.003172993 |
| 1927.399961 | 63.798713 | 1.43985E-06 | 0.002775163 |
| 1927.439961 | 60.364262 | 1.36234E-06 | 0.002625823 |

|             |           |             |             |
|-------------|-----------|-------------|-------------|
| 1927.479961 | 59.728099 | 1.34798E-06 | 0.002598204 |
| 1927.519961 | 47.633181 | 1.07501E-06 | 0.002072112 |
| 1927.559961 | 43.963197 | 9.92188E-07 | 0.001912502 |
| 1927.599961 | 53.379809 | 1.20471E-06 | 0.002322195 |
| 1927.639961 | 69.589924 | 1.57055E-06 | 0.00302745  |
| 1927.679961 | 78.612282 | 1.77417E-06 | 0.003420031 |
| 1927.719961 | 80.490069 | 1.81655E-06 | 0.003501797 |
| 1927.759961 | 83.462949 | 1.88364E-06 | 0.003631211 |
| 1927.799961 | 72.404671 | 1.63407E-06 | 0.003150165 |
| 1927.839961 | 63.482289 | 1.43271E-06 | 0.002762029 |
| 1927.879961 | 70.643702 | 1.59433E-06 | 0.003073677 |
| 1927.919961 | 74.259747 | 1.67594E-06 | 0.003231076 |
| 1927.959961 | 66.893902 | 1.5097E-06  | 0.002910645 |
| 1927.999961 | 58.135645 | 1.31204E-06 | 0.002529614 |
| 1928.039961 | 50.238739 | 1.13382E-06 | 0.002186047 |
| 1928.079961 | 50.367971 | 1.13673E-06 | 0.002191716 |
| 1928.119961 | 52.67447  | 1.18879E-06 | 0.002292129 |
| 1928.159961 | 55.622039 | 1.25531E-06 | 0.002420442 |
| 1928.199961 | 62.677875 | 1.41455E-06 | 0.00272754  |
| 1928.239961 | 73.357448 | 1.65558E-06 | 0.003192347 |
| 1928.279961 | 89.867883 | 2.02819E-06 | 0.003910924 |
| 1928.319961 | 92.638519 | 2.09072E-06 | 0.004031582 |
| 1928.359961 | 85.734937 | 1.93492E-06 | 0.003731219 |
| 1928.399961 | 76.132032 | 1.71819E-06 | 0.003313365 |
| 1928.439961 | 78.266313 | 1.76636E-06 | 0.003406322 |
| 1928.479961 | 79.649181 | 1.79757E-06 | 0.00346658  |
| 1928.519961 | 70.045692 | 1.58083E-06 | 0.003048669 |
| 1928.559961 | 52.28668  | 1.18004E-06 | 0.002275773 |
| 1928.599961 | 46.368051 | 1.04646E-06 | 0.002018207 |
| 1928.639961 | 48.710913 | 1.09934E-06 | 0.002120226 |
| 1928.679961 | 47.455008 | 1.07099E-06 | 0.002065604 |
| 1928.719961 | 45.698311 | 1.03135E-06 | 0.00198918  |
| 1928.759961 | 47.067377 | 1.06225E-06 | 0.002048816 |
| 1928.799961 | 63.890167 | 1.44191E-06 | 0.00278116  |
| 1928.839961 | 75.877378 | 1.71245E-06 | 0.003303036 |
| 1928.879961 | 74.341694 | 1.67779E-06 | 0.003236253 |
| 1928.919961 | 84.24803  | 1.90136E-06 | 0.003667573 |
| 1928.959961 | 84.096958 | 1.89795E-06 | 0.003661072 |
| 1928.999961 | 73.898923 | 1.6678E-06  | 0.003217178 |
| 1929.039961 | 67.381038 | 1.5207E-06  | 0.002933484 |
| 1929.079961 | 66.084069 | 1.49143E-06 | 0.002877079 |
| 1929.119961 | 78.486945 | 1.77134E-06 | 0.003417129 |
| 1929.159961 | 77.233452 | 1.74305E-06 | 0.003362625 |
| 1929.199961 | 70.894562 | 1.59999E-06 | 0.003086704 |
| 1929.239961 | 89.497433 | 2.01983E-06 | 0.003896741 |
| 1929.279961 | 97.314528 | 2.19625E-06 | 0.004237188 |



|             |           |             |             |
|-------------|-----------|-------------|-------------|
| 1929.319961 | 85.240286 | 1.92375E-06 | 0.003711538 |
| 1929.359961 | 71.725869 | 1.61875E-06 | 0.003123157 |
| 1929.399961 | 64.684407 | 1.45984E-06 | 0.002816609 |
| 1929.439961 | 61.374768 | 1.38514E-06 | 0.00267255  |
| 1929.479961 | 60.085852 | 1.35605E-06 | 0.002616479 |
| 1929.519961 | 67.003355 | 1.51217E-06 | 0.002917767 |
| 1929.559961 | 76.209132 | 1.71993E-06 | 0.003318716 |
| 1929.599961 | 73.166272 | 1.65126E-06 | 0.003186273 |
| 1929.639961 | 49.816039 | 1.12428E-06 | 0.002169453 |
| 1929.679961 | 47.168784 | 1.06453E-06 | 0.002054209 |
| 1929.719961 | 61.450566 | 1.38685E-06 | 0.002676239 |
| 1929.759961 | 64.851214 | 1.4636E-06  | 0.0028244   |
| 1929.799961 | 68.199104 | 1.53916E-06 | 0.002970269 |
| 1929.839961 | 68.335597 | 1.54224E-06 | 0.002976275 |
| 1929.879961 | 59.346905 | 1.33938E-06 | 0.002584837 |
| 1929.919961 | 48.659273 | 1.09817E-06 | 0.002119384 |
| 1929.959961 | 64.539035 | 1.45656E-06 | 0.002811095 |
| 1929.999961 | 87.811358 | 1.98178E-06 | 0.003824835 |
| 1930.039961 | 87.374829 | 1.97193E-06 | 0.0038059   |
| 1930.079961 | 77.922788 | 1.75861E-06 | 0.003394256 |
| 1930.119961 | 72.465982 | 1.63546E-06 | 0.003156627 |
| 1930.159961 | 77.27985  | 1.7441E-06  | 0.003366389 |
| 1930.199961 | 73.701417 | 1.66334E-06 | 0.003210576 |
| 1930.239961 | 76.244866 | 1.72074E-06 | 0.003321442 |
| 1930.279961 | 77.921786 | 1.75859E-06 | 0.003394564 |
| 1930.319961 | 70.520552 | 1.59155E-06 | 0.003072202 |
| 1930.359961 | 73.628798 | 1.6617E-06  | 0.003207678 |
| 1930.399961 | 66.157235 | 1.49308E-06 | 0.002882235 |
| 1930.439961 | 54.674224 | 1.23392E-06 | 0.002382011 |
| 1930.479961 | 60.122266 | 1.35688E-06 | 0.002619422 |
| 1930.519961 | 72.481492 | 1.63581E-06 | 0.003157957 |
| 1930.559961 | 79.390837 | 1.79174E-06 | 0.003459063 |
| 1930.599961 | 81.701284 | 1.84388E-06 | 0.003559803 |
| 1930.639961 | 66.374769 | 1.49799E-06 | 0.002892072 |
| 1930.679961 | 71.622345 | 1.61642E-06 | 0.003120783 |
| 1930.719961 | 74.228976 | 1.67524E-06 | 0.003234428 |
| 1930.759961 | 65.201972 | 1.47152E-06 | 0.002841147 |
| 1930.799961 | 56.841063 | 1.28282E-06 | 0.002476876 |
| 1930.839961 | 53.093647 | 1.19825E-06 | 0.002313628 |
| 1930.879961 | 49.709502 | 1.12187E-06 | 0.002166204 |
| 1930.919961 | 53.797265 | 1.21413E-06 | 0.002344387 |
| 1930.959961 | 55.633208 | 1.25556E-06 | 0.002424444 |
| 1930.999961 | 59.605971 | 1.34522E-06 | 0.002597627 |
| 1931.039961 | 61.403223 | 1.38579E-06 | 0.002676007 |
| 1931.079961 | 56.115916 | 1.26646E-06 | 0.002445632 |
| 1931.119961 | 46.692313 | 1.05378E-06 | 0.002034976 |

|             |           |             |             |
|-------------|-----------|-------------|-------------|
| 1931.159961 | 52.93298  | 1.19462E-06 | 0.002307009 |
| 1931.199961 | 56.218365 | 1.26877E-06 | 0.002450249 |
| 1931.239961 | 60.001809 | 1.35416E-06 | 0.002615203 |
| 1931.279961 | 62.65314  | 1.41399E-06 | 0.002730818 |
| 1931.319961 | 63.891531 | 1.44194E-06 | 0.002784853 |
| 1931.359961 | 56.916585 | 1.28453E-06 | 0.002480886 |
| 1931.399961 | 55.192001 | 1.24561E-06 | 0.002405765 |
| 1931.439961 | 71.82723  | 1.62104E-06 | 0.003130942 |
| 1931.479961 | 94.135397 | 2.1245E-06  | 0.004103438 |
| 1931.519961 | 91.274956 | 2.05995E-06 | 0.003978832 |
| 1931.559961 | 83.616566 | 1.88711E-06 | 0.003645065 |
| 1931.599961 | 83.212552 | 1.87799E-06 | 0.003627528 |
| 1931.639961 | 73.50938  | 1.659E-06   | 0.003204599 |
| 1931.679961 | 71.413584 | 1.61171E-06 | 0.003113298 |
| 1931.719961 | 87.259923 | 1.96933E-06 | 0.003804204 |
| 1931.759961 | 98.191553 | 2.21605E-06 | 0.00428087  |
| 1931.799961 | 84.995066 | 1.91822E-06 | 0.003705618 |
| 1931.839961 | 60.809463 | 1.37238E-06 | 0.002651228 |
| 1931.879961 | 51.926204 | 1.1719E-06  | 0.002263974 |
| 1931.919961 | 63.946791 | 1.44319E-06 | 0.002788128 |
| 1931.959961 | 70.958574 | 1.60144E-06 | 0.003093911 |
| 1931.999961 | 63.849375 | 1.44099E-06 | 0.002783995 |
| 1932.039961 | 58.966915 | 1.3308E-06  | 0.002571161 |
| 1932.079961 | 67.232333 | 1.51734E-06 | 0.002931622 |
| 1932.119961 | 79.379626 | 1.79149E-06 | 0.003461369 |
| 1932.159961 | 85.228997 | 1.9235E-06  | 0.003716509 |
| 1932.199961 | 69.066385 | 1.55873E-06 | 0.003011782 |
| 1932.239961 | 60.822433 | 1.37268E-06 | 0.002652343 |
| 1932.279961 | 72.365954 | 1.6332E-06  | 0.003155797 |
| 1932.319961 | 67.737365 | 1.52874E-06 | 0.002954011 |
| 1932.359961 | 52.521704 | 1.18534E-06 | 0.002290507 |
| 1932.399961 | 44.872484 | 1.01271E-06 | 0.00195696  |
| 1932.439961 | 50.4399   | 1.13836E-06 | 0.002199809 |
| 1932.479961 | 54.664804 | 1.23371E-06 | 0.002384117 |
| 1932.519961 | 54.915503 | 1.23937E-06 | 0.0023951   |
| 1932.559961 | 49.159852 | 1.10947E-06 | 0.002144116 |
| 1932.599961 | 52.062661 | 1.17498E-06 | 0.00227077  |
| 1932.639961 | 58.432385 | 1.31874E-06 | 0.002548645 |
| 1932.679961 | 60.969174 | 1.37599E-06 | 0.002659347 |
| 1932.719961 | 61.743017 | 1.39345E-06 | 0.002693156 |
| 1932.759961 | 65.330486 | 1.47442E-06 | 0.002849696 |
| 1932.799961 | 78.714779 | 1.77648E-06 | 0.003433586 |
| 1932.839961 | 85.701023 | 1.93415E-06 | 0.003738408 |
| 1932.879961 | 79.588643 | 1.7962E-06  | 0.003471848 |
| 1932.919961 | 63.114714 | 1.42441E-06 | 0.002753273 |
| 1932.959961 | 61.501841 | 1.38801E-06 | 0.002682969 |

|             |           |             |             |
|-------------|-----------|-------------|-------------|
| 1932.999961 | 75.505883 | 1.70406E-06 | 0.003293953 |
| 1933.039961 | 73.73269  | 1.66404E-06 | 0.003216664 |
| 1933.079961 | 67.873506 | 1.53181E-06 | 0.002961112 |
| 1933.119961 | 72.819976 | 1.64345E-06 | 0.003176977 |
| 1933.159961 | 85.846327 | 1.93743E-06 | 0.003745366 |
| 1933.199961 | 78.510324 | 1.77187E-06 | 0.003425376 |
| 1933.239961 | 60.915707 | 1.37478E-06 | 0.002657785 |
| 1933.279961 | 57.762423 | 1.30362E-06 | 0.002520257 |
| 1933.319961 | 60.145149 | 1.35739E-06 | 0.002624274 |
| 1933.359961 | 63.683892 | 1.43726E-06 | 0.002778735 |
| 1933.399961 | 66.545718 | 1.50184E-06 | 0.002903665 |
| 1933.439961 | 67.068208 | 1.51364E-06 | 0.002926524 |
| 1933.479961 | 74.743682 | 1.68686E-06 | 0.003261512 |
| 1933.519961 | 73.459923 | 1.65789E-06 | 0.00320556  |
| 1933.559961 | 75.621127 | 1.70666E-06 | 0.003299936 |
| 1933.599961 | 76.218009 | 1.72013E-06 | 0.003326052 |
| 1933.639961 | 77.306493 | 1.7447E-06  | 0.003373621 |
| 1933.679961 | 73.420814 | 1.65701E-06 | 0.003204118 |
| 1933.719961 | 72.087599 | 1.62692E-06 | 0.003146001 |
| 1933.759961 | 69.568406 | 1.57006E-06 | 0.003036123 |
| 1933.799961 | 60.210446 | 1.35887E-06 | 0.002627775 |
| 1933.839961 | 61.8801   | 1.39655E-06 | 0.0027007   |
| 1933.879961 | 60.267354 | 1.36015E-06 | 0.002630367 |
| 1933.919961 | 54.418837 | 1.22816E-06 | 0.002375158 |
| 1933.959961 | 56.982288 | 1.28601E-06 | 0.002487094 |
| 1933.999961 | 60.007086 | 1.35428E-06 | 0.00261917  |
| 1934.039961 | 51.984985 | 1.17323E-06 | 0.002269071 |
| 1934.079961 | 47.288354 | 1.06723E-06 | 0.002064113 |
| 1934.119961 | 53.127568 | 1.19902E-06 | 0.002319039 |
| 1934.159961 | 56.203985 | 1.26845E-06 | 0.002453377 |
| 1934.199961 | 69.345267 | 1.56503E-06 | 0.003027073 |
| 1934.239961 | 73.817229 | 1.66595E-06 | 0.003222351 |
| 1934.279961 | 71.369708 | 1.61071E-06 | 0.003115574 |
| 1934.319961 | 55.802527 | 1.25939E-06 | 0.002436054 |
| 1934.359961 | 52.138311 | 1.17669E-06 | 0.00227614  |
| 1934.399961 | 64.253212 | 1.45011E-06 | 0.002805084 |
| 1934.439961 | 66.146222 | 1.49283E-06 | 0.002887786 |
| 1934.479961 | 67.498252 | 1.52334E-06 | 0.002946874 |
| 1934.519961 | 72.240388 | 1.63036E-06 | 0.003153974 |
| 1934.559961 | 74.945381 | 1.69141E-06 | 0.00327214  |
| 1934.599961 | 67.495795 | 1.52329E-06 | 0.002946949 |
| 1934.639961 | 69.891137 | 1.57735E-06 | 0.003051596 |
| 1934.679961 | 68.844616 | 1.55373E-06 | 0.003005965 |
| 1934.719961 | 56.523776 | 1.27566E-06 | 0.00246805  |
| 1934.759961 | 51.016693 | 1.15138E-06 | 0.002227636 |
| 1934.799961 | 50.691318 | 1.14403E-06 | 0.002213474 |

|             |           |             |             |
|-------------|-----------|-------------|-------------|
| 1934.839961 | 55.728546 | 1.25772E-06 | 0.002433479 |
| 1934.879961 | 64.43221  | 1.45415E-06 | 0.002813596 |
| 1934.919961 | 70.654691 | 1.59458E-06 | 0.003085381 |
| 1934.959961 | 80.188484 | 1.80974E-06 | 0.003501779 |
| 1934.999961 | 83.941246 | 1.89444E-06 | 0.003665736 |
| 1935.039961 | 75.23596  | 1.69797E-06 | 0.003285641 |
| 1935.079961 | 73.389189 | 1.65629E-06 | 0.003205057 |
| 1935.119961 | 67.816214 | 1.53052E-06 | 0.002961735 |
| 1935.159961 | 57.38994  | 1.29521E-06 | 0.00250644  |
| 1935.199961 | 61.748002 | 1.39357E-06 | 0.00269683  |
| 1935.239961 | 81.781527 | 1.8457E-06  | 0.003571863 |
| 1935.279961 | 77.502962 | 1.74913E-06 | 0.003385064 |
| 1935.319961 | 56.370072 | 1.27219E-06 | 0.002462102 |
| 1935.359961 | 47.484063 | 1.07165E-06 | 0.002074027 |
| 1935.399961 | 52.055693 | 1.17482E-06 | 0.002273755 |
| 1935.439961 | 51.273523 | 1.15717E-06 | 0.002239637 |
| 1935.479961 | 50.759106 | 1.14556E-06 | 0.002217213 |
| 1935.519961 | 53.298888 | 1.20288E-06 | 0.002328201 |
| 1935.559961 | 57.561747 | 1.29909E-06 | 0.002514464 |
| 1935.599961 | 55.270277 | 1.24737E-06 | 0.002414415 |
| 1935.639961 | 56.073552 | 1.2655E-06  | 0.002449556 |
| 1935.679961 | 54.371509 | 1.22709E-06 | 0.002375252 |
| 1935.719961 | 56.79066  | 1.28169E-06 | 0.002480985 |
| 1935.759961 | 57.07846  | 1.28818E-06 | 0.00249361  |
| 1935.799961 | 70.003388 | 1.57988E-06 | 0.00305833  |
| 1935.839961 | 83.019258 | 1.87363E-06 | 0.003627046 |
| 1935.879961 | 80.524877 | 1.81733E-06 | 0.003518141 |
| 1935.919961 | 85.779733 | 1.93593E-06 | 0.003747804 |
| 1935.959961 | 78.340069 | 1.76803E-06 | 0.003422828 |
| 1935.999961 | 65.229878 | 1.47215E-06 | 0.002850077 |
| 1936.039961 | 58.654546 | 1.32375E-06 | 0.002562836 |
| 1936.079961 | 54.751291 | 1.23566E-06 | 0.002392337 |
| 1936.119961 | 66.935565 | 1.51064E-06 | 0.002924785 |
| 1936.159961 | 72.187537 | 1.62917E-06 | 0.003154338 |
| 1936.199961 | 59.969063 | 1.35342E-06 | 0.002620488 |
| 1936.239961 | 56.267166 | 1.26987E-06 | 0.002458776 |
| 1936.279961 | 54.448884 | 1.22884E-06 | 0.002379369 |
| 1936.319961 | 54.27849  | 1.22499E-06 | 0.002371972 |
| 1936.359961 | 49.53277  | 1.11789E-06 | 0.002164629 |
| 1936.399961 | 52.472605 | 1.18423E-06 | 0.00229315  |
| 1936.439961 | 58.879416 | 1.32883E-06 | 0.002573193 |
| 1936.479961 | 61.734755 | 1.39327E-06 | 0.002698034 |
| 1936.519961 | 73.458501 | 1.65786E-06 | 0.003210471 |
| 1936.559961 | 74.371768 | 1.67847E-06 | 0.003250452 |
| 1936.599961 | 59.741951 | 1.34829E-06 | 0.002611103 |
| 1936.639961 | 53.315665 | 1.20326E-06 | 0.002330282 |

|             |           |             |             |
|-------------|-----------|-------------|-------------|
| 1936.679961 | 64.614256 | 1.45825E-06 | 0.002824171 |
| 1936.719961 | 62.919624 | 1.42001E-06 | 0.002750158 |
| 1936.759961 | 58.534774 | 1.32105E-06 | 0.002558553 |
| 1936.799961 | 57.635953 | 1.30076E-06 | 0.002519318 |
| 1936.839961 | 53.266866 | 1.20216E-06 | 0.00232839  |
| 1936.879961 | 60.468094 | 1.36468E-06 | 0.002643223 |
| 1936.919961 | 75.876982 | 1.71244E-06 | 0.003316855 |
| 1936.959961 | 68.992835 | 1.55707E-06 | 0.003015986 |
| 1936.999961 | 58.233482 | 1.31425E-06 | 0.002545699 |
| 1937.039961 | 45.908871 | 1.0361E-06  | 0.002006966 |
| 1937.079961 | 34.762044 | 7.84531E-07 | 0.001519699 |
| 1937.119961 | 38.749926 | 8.74532E-07 | 0.001694073 |
| 1937.159961 | 48.373706 | 1.09173E-06 | 0.00211485  |
| 1937.199961 | 57.812651 | 1.30475E-06 | 0.002527564 |
| 1937.239961 | 60.616676 | 1.36803E-06 | 0.00265021  |
| 1937.279961 | 62.248596 | 1.40486E-06 | 0.002721615 |
| 1937.319961 | 62.141122 | 1.40244E-06 | 0.002716972 |
| 1937.359961 | 65.576852 | 1.47998E-06 | 0.002867251 |
| 1937.399961 | 61.108941 | 1.37914E-06 | 0.002671953 |
| 1937.439961 | 51.137559 | 1.1541E-06  | 0.002236006 |
| 1937.479961 | 54.594722 | 1.23213E-06 | 0.002387221 |
| 1937.519961 | 61.198813 | 1.38117E-06 | 0.002676048 |
| 1937.559961 | 74.604351 | 1.68372E-06 | 0.003262301 |
| 1937.599961 | 74.276646 | 1.67632E-06 | 0.003248038 |
| 1937.639961 | 78.593125 | 1.77374E-06 | 0.003436864 |
| 1937.679961 | 74.856506 | 1.68941E-06 | 0.00327353  |
| 1937.719961 | 66.004447 | 1.48963E-06 | 0.002886483 |
| 1937.759961 | 64.383778 | 1.45305E-06 | 0.002815666 |
| 1937.799961 | 62.809223 | 1.41752E-06 | 0.002746864 |
| 1937.839961 | 66.342058 | 1.49725E-06 | 0.002901427 |
| 1937.879961 | 65.487352 | 1.47796E-06 | 0.002864106 |
| 1937.919961 | 58.768236 | 1.32632E-06 | 0.002570297 |
| 1937.959961 | 56.225597 | 1.26893E-06 | 0.002459142 |
| 1937.999961 | 58.158711 | 1.31256E-06 | 0.002543743 |
| 1938.039961 | 60.479006 | 1.36493E-06 | 0.002645283 |
| 1938.079961 | 59.469653 | 1.34215E-06 | 0.002601189 |
| 1938.119961 | 58.827376 | 1.32765E-06 | 0.002573149 |
| 1938.159961 | 63.885814 | 1.44181E-06 | 0.002794466 |
| 1938.199961 | 71.673305 | 1.61757E-06 | 0.003135168 |
| 1938.239961 | 72.306352 | 1.63185E-06 | 0.003162924 |
| 1938.279961 | 70.837417 | 1.5987E-06  | 0.003098732 |
| 1938.319961 | 70.383423 | 1.58846E-06 | 0.003078936 |
| 1938.359961 | 68.178468 | 1.53869E-06 | 0.002982541 |
| 1938.399961 | 66.999608 | 1.51209E-06 | 0.002931031 |
| 1938.439961 | 58.676234 | 1.32424E-06 | 0.002566961 |
| 1938.479961 | 62.357481 | 1.40732E-06 | 0.002728065 |

|             |           |             |             |
|-------------|-----------|-------------|-------------|
| 1938.519961 | 71.170834 | 1.60623E-06 | 0.003113702 |
| 1938.559961 | 81.671618 | 1.84321E-06 | 0.003573182 |
| 1938.599961 | 82.596829 | 1.8641E-06  | 0.003613735 |
| 1938.639961 | 70.096688 | 1.58198E-06 | 0.003066899 |
| 1938.679961 | 58.355084 | 1.31699E-06 | 0.002553228 |
| 1938.719961 | 59.177493 | 1.33555E-06 | 0.002589264 |
| 1938.759961 | 64.304104 | 1.45125E-06 | 0.002813633 |
| 1938.799961 | 61.524474 | 1.38852E-06 | 0.002692066 |
| 1938.839961 | 67.017709 | 1.5125E-06  | 0.002932488 |
| 1938.879961 | 75.13411  | 1.69567E-06 | 0.003287705 |
| 1938.919961 | 71.854019 | 1.62165E-06 | 0.00314424  |
| 1938.959961 | 60.52373  | 1.36594E-06 | 0.002648496 |
| 1938.999961 | 60.881022 | 1.374E-06   | 0.002664186 |
| 1939.039961 | 59.416642 | 1.34095E-06 | 0.002600157 |
| 1939.079961 | 60.369741 | 1.36246E-06 | 0.002641921 |
| 1939.119961 | 54.64772  | 1.23332E-06 | 0.002391561 |
| 1939.159961 | 39.964854 | 9.01951E-07 | 0.001749027 |
| 1939.199961 | 38.462792 | 8.68052E-07 | 0.001683326 |
| 1939.239961 | 49.544164 | 1.11814E-06 | 0.002168347 |
| 1939.279961 | 61.236339 | 1.38202E-06 | 0.002680122 |
| 1939.319961 | 69.278823 | 1.56353E-06 | 0.003032178 |
| 1939.359961 | 69.518071 | 1.56893E-06 | 0.003042712 |
| 1939.399961 | 70.301297 | 1.5866E-06  | 0.003077057 |
| 1939.439961 | 80.740134 | 1.82219E-06 | 0.003534033 |
| 1939.479961 | 82.012012 | 1.8509E-06  | 0.003589777 |
| 1939.519961 | 68.038068 | 1.53552E-06 | 0.00297818  |
| 1939.559961 | 58.33751  | 1.3166E-06  | 0.002553618 |
| 1939.599961 | 68.854508 | 1.55395E-06 | 0.003014042 |
| 1939.639961 | 76.367156 | 1.7235E-06  | 0.00334297  |
| 1939.679961 | 73.587076 | 1.66076E-06 | 0.003221339 |
| 1939.719961 | 70.049523 | 1.58092E-06 | 0.003066542 |
| 1939.759961 | 70.294916 | 1.58646E-06 | 0.003077348 |
| 1939.799961 | 72.804131 | 1.64309E-06 | 0.003187262 |
| 1939.839961 | 76.699656 | 1.731E-06   | 0.003357872 |
| 1939.879961 | 92.610246 | 2.09008E-06 | 0.004054513 |
| 1939.919961 | 79.378286 | 1.79146E-06 | 0.003475284 |
| 1939.959961 | 57.041093 | 1.28734E-06 | 0.002497384 |
| 1939.999961 | 45.957111 | 1.03719E-06 | 0.002012145 |
| 1940.039961 | 52.158252 | 1.17714E-06 | 0.002283697 |
| 1940.079961 | 77.207359 | 1.74246E-06 | 0.003380517 |
| 1940.119961 | 85.736726 | 1.93496E-06 | 0.003754052 |
| 1940.159961 | 86.245824 | 1.94645E-06 | 0.003776421 |
| 1940.199961 | 78.821633 | 1.77889E-06 | 0.003451411 |
| 1940.239961 | 75.685601 | 1.70812E-06 | 0.00331416  |
| 1940.279961 | 74.794953 | 1.68802E-06 | 0.003275227 |
| 1940.319961 | 71.79205  | 1.62025E-06 | 0.003143797 |

|             |           |             |             |
|-------------|-----------|-------------|-------------|
| 1940.359961 | 66.298209 | 1.49626E-06 | 0.00290328  |
| 1940.399961 | 65.109834 | 1.46944E-06 | 0.002851298 |
| 1940.439961 | 70.69587  | 1.59551E-06 | 0.003095986 |
| 1940.479961 | 72.434443 | 1.63474E-06 | 0.003172189 |
| 1940.519961 | 71.601261 | 1.61594E-06 | 0.003135765 |
| 1940.559961 | 70.281915 | 1.58616E-06 | 0.003078048 |
| 1940.599961 | 64.631869 | 1.45865E-06 | 0.002830659 |
| 1940.639961 | 57.665479 | 1.30143E-06 | 0.002525606 |
| 1940.679961 | 67.149177 | 1.51546E-06 | 0.002941029 |
| 1940.719961 | 77.140384 | 1.74095E-06 | 0.003378698 |
| 1940.759961 | 78.65927  | 1.77523E-06 | 0.003445296 |
| 1940.799961 | 66.414739 | 1.49889E-06 | 0.002909042 |
| 1940.839961 | 58.740059 | 1.32568E-06 | 0.002572935 |
| 1940.879961 | 60.100543 | 1.35639E-06 | 0.002632582 |
| 1940.919961 | 70.785451 | 1.59753E-06 | 0.003100676 |
| 1940.959961 | 69.830541 | 1.57598E-06 | 0.00305891  |
| 1940.999961 | 57.623164 | 1.30047E-06 | 0.002524221 |
| 1941.039961 | 52.396862 | 1.18252E-06 | 0.002295327 |
| 1941.079961 | 58.191413 | 1.3133E-06  | 0.002549219 |
| 1941.119961 | 56.483902 | 1.27476E-06 | 0.002474468 |
| 1941.159961 | 55.271221 | 1.24739E-06 | 0.002421392 |
| 1941.199961 | 54.829116 | 1.23742E-06 | 0.002402073 |
| 1941.239961 | 53.142538 | 1.19935E-06 | 0.002328232 |
| 1941.279961 | 64.178603 | 1.44842E-06 | 0.002811792 |
| 1941.319961 | 77.46951  | 1.74838E-06 | 0.003394163 |
| 1941.359961 | 77.630468 | 1.75201E-06 | 0.003401285 |
| 1941.399961 | 75.480955 | 1.7035E-06  | 0.003307175 |
| 1941.439961 | 71.857039 | 1.62171E-06 | 0.003148459 |
| 1941.479961 | 60.776208 | 1.37163E-06 | 0.002663001 |
| 1941.519961 | 55.480918 | 1.25213E-06 | 0.00243103  |
| 1941.559961 | 66.203396 | 1.49412E-06 | 0.002900921 |
| 1941.599961 | 68.936151 | 1.55579E-06 | 0.003020727 |
| 1941.639961 | 63.930626 | 1.44283E-06 | 0.002801447 |
| 1941.679961 | 64.18945  | 1.44867E-06 | 0.002812847 |
| 1941.719961 | 58.26752  | 1.31502E-06 | 0.002553394 |
| 1941.759961 | 57.553761 | 1.29891E-06 | 0.002522168 |
| 1941.799961 | 51.978135 | 1.17307E-06 | 0.002277875 |
| 1941.839961 | 53.67367  | 1.21134E-06 | 0.002352228 |
| 1941.879961 | 56.43454  | 1.27365E-06 | 0.002473273 |
| 1941.919961 | 51.185865 | 1.15519E-06 | 0.002243294 |
| 1941.959961 | 53.520426 | 1.20788E-06 | 0.002345657 |
| 1941.999961 | 57.209436 | 1.29114E-06 | 0.002507389 |
| 1942.039961 | 54.248126 | 1.2243E-06  | 0.002377649 |
| 1942.079961 | 62.399729 | 1.40827E-06 | 0.002734983 |
| 1942.119961 | 70.252122 | 1.58549E-06 | 0.003079217 |
| 1942.159961 | 74.712341 | 1.68615E-06 | 0.00327478  |

|             |           |             |             |
|-------------|-----------|-------------|-------------|
| 1942.199961 | 87.65723  | 1.9783E-06  | 0.003842257 |
| 1942.239961 | 82.918268 | 1.87135E-06 | 0.00363461  |
| 1942.279961 | 73.106593 | 1.64991E-06 | 0.003204595 |
| 1942.319961 | 71.532291 | 1.61438E-06 | 0.003135651 |
| 1942.359961 | 76.333204 | 1.72273E-06 | 0.00334617  |
| 1942.399961 | 78.943999 | 1.78166E-06 | 0.003460689 |
| 1942.439961 | 70.411409 | 1.58909E-06 | 0.003086707 |
| 1942.479961 | 66.728911 | 1.50598E-06 | 0.002925333 |
| 1942.519961 | 63.796257 | 1.43979E-06 | 0.002796826 |
| 1942.559961 | 68.569912 | 1.54753E-06 | 0.003006165 |
| 1942.599961 | 60.438517 | 1.36401E-06 | 0.002649732 |
| 1942.639961 | 42.260807 | 9.53768E-07 | 0.001852827 |
| 1942.679961 | 35.699915 | 8.05697E-07 | 0.001565212 |
| 1942.719961 | 37.407048 | 8.44225E-07 | 0.001640093 |
| 1942.759961 | 42.07589  | 9.49594E-07 | 0.001844834 |
| 1942.799961 | 50.146173 | 1.13173E-06 | 0.002198724 |
| 1942.839961 | 60.369754 | 1.36246E-06 | 0.002647044 |
| 1942.879961 | 58.443745 | 1.31899E-06 | 0.002562647 |
| 1942.919961 | 58.497649 | 1.32021E-06 | 0.002565063 |
| 1942.959961 | 59.361758 | 1.33971E-06 | 0.002603007 |
| 1942.999961 | 51.645326 | 1.16556E-06 | 0.002264689 |
| 1943.039961 | 48.488003 | 1.09431E-06 | 0.002126282 |
| 1943.079961 | 53.608184 | 1.20986E-06 | 0.002350859 |
| 1943.119961 | 57.191785 | 1.29074E-06 | 0.002508061 |
| 1943.159961 | 62.054265 | 1.40048E-06 | 0.002721353 |
| 1943.199961 | 70.113844 | 1.58237E-06 | 0.003074865 |
| 1943.239961 | 66.043475 | 1.49051E-06 | 0.002896417 |
| 1943.279961 | 62.375664 | 1.40773E-06 | 0.002735617 |
| 1943.319961 | 67.579348 | 1.52517E-06 | 0.002963897 |
| 1943.359961 | 71.961965 | 1.62408E-06 | 0.003156175 |
| 1943.399961 | 75.270271 | 1.69875E-06 | 0.003301341 |
| 1943.439961 | 72.796963 | 1.64293E-06 | 0.003192928 |
| 1943.479961 | 64.16111  | 1.44803E-06 | 0.002814211 |
| 1943.519961 | 54.823042 | 1.23728E-06 | 0.002404678 |
| 1943.559961 | 51.181137 | 1.15509E-06 | 0.002244981 |
| 1943.599961 | 51.246773 | 1.15657E-06 | 0.002247906 |
| 1943.639961 | 45.397552 | 1.02456E-06 | 0.001991375 |
| 1943.679961 | 37.816373 | 8.53463E-07 | 0.001658859 |
| 1943.719961 | 35.899994 | 8.10213E-07 | 0.001574827 |
| 1943.759961 | 48.417325 | 1.09271E-06 | 0.002123969 |
| 1943.799961 | 65.954006 | 1.48849E-06 | 0.002893327 |
| 1943.839961 | 66.957528 | 1.51114E-06 | 0.002937411 |
| 1943.879961 | 55.987534 | 1.26356E-06 | 0.00245621  |
| 1943.919961 | 41.838903 | 9.44246E-07 | 0.001835538 |
| 1943.959961 | 49.947145 | 1.12724E-06 | 0.002191305 |
| 1943.999961 | 65.409395 | 1.4762E-06  | 0.002869731 |



|             |           |             |             |
|-------------|-----------|-------------|-------------|
| 1944.039961 | 69.523525 | 1.56905E-06 | 0.003050294 |
| 1944.079961 | 62.038369 | 1.40012E-06 | 0.002721944 |
| 1944.119961 | 53.165352 | 1.19987E-06 | 0.002332687 |
| 1944.159961 | 42.412251 | 9.57185E-07 | 0.001860922 |
| 1944.199961 | 49.779115 | 1.12345E-06 | 0.002184202 |
| 1944.239961 | 72.102075 | 1.62724E-06 | 0.003163752 |
| 1944.279961 | 78.630735 | 1.77459E-06 | 0.003450292 |
| 1944.319961 | 66.101108 | 1.49181E-06 | 0.002900556 |
| 1944.359961 | 62.015072 | 1.39959E-06 | 0.002721314 |
| 1944.399961 | 64.383353 | 1.45304E-06 | 0.002825296 |
| 1944.439961 | 60.407614 | 1.36332E-06 | 0.002650886 |
| 1944.479961 | 56.829383 | 1.28256E-06 | 0.002493912 |
| 1944.519961 | 52.574635 | 1.18654E-06 | 0.002307243 |
| 1944.559961 | 61.109617 | 1.37916E-06 | 0.002681857 |
| 1944.599961 | 69.273045 | 1.5634E-06  | 0.00304018  |
| 1944.639961 | 53.309938 | 1.20313E-06 | 0.002339657 |
| 1944.679961 | 35.747139 | 8.06763E-07 | 0.001568896 |
| 1944.719961 | 42.879969 | 9.67741E-07 | 0.001881986 |
| 1944.759961 | 53.234716 | 1.20143E-06 | 0.0023365   |
| 1944.799961 | 56.174559 | 1.26778E-06 | 0.002465582 |
| 1944.839961 | 52.729276 | 1.19003E-06 | 0.002314411 |
| 1944.879961 | 58.037736 | 1.30983E-06 | 0.002547464 |
| 1944.919961 | 67.467135 | 1.52264E-06 | 0.002961411 |
| 1944.959961 | 75.54841  | 1.70502E-06 | 0.0033162   |
| 1944.999961 | 71.326417 | 1.60974E-06 | 0.00313094  |
| 1945.039961 | 59.391466 | 1.34038E-06 | 0.002607098 |
| 1945.079961 | 53.827154 | 1.2148E-06  | 0.002362891 |
| 1945.119961 | 70.809333 | 1.59807E-06 | 0.003108434 |
| 1945.159961 | 77.511476 | 1.74933E-06 | 0.003402719 |
| 1945.199961 | 63.977889 | 1.44389E-06 | 0.002808658 |
| 1945.239961 | 53.764614 | 1.21339E-06 | 0.002360339 |
| 1945.279961 | 70.039408 | 1.58069E-06 | 0.003074888 |
| 1945.319961 | 83.41851  | 1.88264E-06 | 0.003662336 |
| 1945.359961 | 79.465405 | 1.79342E-06 | 0.003488854 |
| 1945.399961 | 74.239802 | 1.67549E-06 | 0.003259496 |
| 1945.439961 | 64.848756 | 1.46355E-06 | 0.002847241 |
| 1945.479961 | 54.081161 | 1.22054E-06 | 0.002374529 |
| 1945.519961 | 43.858424 | 9.89824E-07 | 0.001925721 |
| 1945.559961 | 45.726297 | 1.03198E-06 | 0.002007777 |
| 1945.599961 | 62.24978  | 1.40489E-06 | 0.002733356 |
| 1945.639961 | 76.156417 | 1.71874E-06 | 0.003344058 |
| 1945.679961 | 73.314278 | 1.6546E-06  | 0.003219324 |
| 1945.719961 | 62.567651 | 1.41206E-06 | 0.002747483 |
| 1945.759961 | 58.298997 | 1.31573E-06 | 0.002560089 |
| 1945.799961 | 55.237939 | 1.24664E-06 | 0.002425719 |
| 1945.839961 | 59.53432  | 1.34361E-06 | 0.002614444 |

|             |           |             |             |
|-------------|-----------|-------------|-------------|
| 1945.879961 | 66.199985 | 1.49404E-06 | 0.002907225 |
| 1945.919961 | 70.801912 | 1.5979E-06  | 0.003109387 |
| 1945.959961 | 78.829613 | 1.77907E-06 | 0.003462008 |
| 1945.999961 | 80.165359 | 1.80922E-06 | 0.003520743 |
| 1946.039961 | 69.72797  | 1.57366E-06 | 0.003062411 |
| 1946.079961 | 59.524095 | 1.34338E-06 | 0.002614317 |
| 1946.119961 | 55.929752 | 1.26226E-06 | 0.002456503 |
| 1946.159961 | 58.355552 | 1.317E-06   | 0.0025631   |
| 1946.199961 | 67.136062 | 1.51517E-06 | 0.002948819 |
| 1946.239961 | 61.59661  | 1.39015E-06 | 0.002705565 |
| 1946.279961 | 59.95228  | 1.35304E-06 | 0.002633394 |
| 1946.319961 | 73.030295 | 1.64819E-06 | 0.003207909 |
| 1946.359961 | 82.285719 | 1.85707E-06 | 0.003614535 |
| 1946.399961 | 88.167994 | 1.98983E-06 | 0.003873003 |
| 1946.439961 | 77.802961 | 1.7559E-06  | 0.003417763 |
| 1946.479961 | 59.644515 | 1.34609E-06 | 0.002620144 |
| 1946.519961 | 50.566969 | 1.14123E-06 | 0.002221419 |
| 1946.559961 | 50.939662 | 1.14964E-06 | 0.002237838 |
| 1946.599961 | 50.772653 | 1.14587E-06 | 0.002230547 |
| 1946.639961 | 51.116874 | 1.15364E-06 | 0.002245715 |
| 1946.679961 | 54.94619  | 1.24006E-06 | 0.002413998 |
| 1946.719961 | 57.383122 | 1.29506E-06 | 0.002521114 |
| 1946.759961 | 62.877492 | 1.41906E-06 | 0.002762564 |
| 1946.799961 | 74.121451 | 1.67282E-06 | 0.003256642 |
| 1946.839961 | 67.113765 | 1.51466E-06 | 0.002948809 |
| 1946.879961 | 57.448708 | 1.29654E-06 | 0.002524203 |
| 1946.919961 | 60.250497 | 1.35977E-06 | 0.002647363 |
| 1946.959961 | 61.015543 | 1.37704E-06 | 0.002681034 |
| 1946.999961 | 56.27143  | 1.26997E-06 | 0.002472627 |
| 1947.039961 | 50.599873 | 1.14197E-06 | 0.002223459 |
| 1947.079961 | 50.004449 | 1.12853E-06 | 0.00219734  |
| 1947.119961 | 43.101792 | 9.72747E-07 | 0.001894056 |
| 1947.159961 | 43.482845 | 9.81347E-07 | 0.00191084  |
| 1947.199961 | 55.304895 | 1.24815E-06 | 0.002430406 |
| 1947.239961 | 60.995851 | 1.37659E-06 | 0.002680554 |
| 1947.279961 | 62.828469 | 1.41795E-06 | 0.002761148 |
| 1947.319961 | 80.590744 | 1.81882E-06 | 0.003541826 |
| 1947.359961 | 83.237338 | 1.87855E-06 | 0.003658215 |
| 1947.399961 | 76.71734  | 1.7314E-06  | 0.003371735 |
| 1947.439961 | 66.6836   | 1.50496E-06 | 0.002930811 |
| 1947.479961 | 51.805954 | 1.16919E-06 | 0.002276971 |
| 1947.519961 | 41.014059 | 9.2563E-07  | 0.001802683 |
| 1947.559961 | 37.440706 | 8.44985E-07 | 0.001645658 |
| 1947.599961 | 43.557047 | 9.83022E-07 | 0.001914533 |
| 1947.639961 | 50.673553 | 1.14363E-06 | 0.002227382 |
| 1947.679961 | 50.834529 | 1.14726E-06 | 0.002234504 |

|             |           |             |             |
|-------------|-----------|-------------|-------------|
| 1947.719961 | 55.811375 | 1.25958E-06 | 0.002453319 |
| 1947.759961 | 59.118699 | 1.33423E-06 | 0.002598753 |
| 1947.799961 | 44.391556 | 1.00186E-06 | 0.001951414 |
| 1947.839961 | 35.369401 | 7.98238E-07 | 0.00155484  |
| 1947.879961 | 40.918223 | 9.23467E-07 | 0.001798803 |
| 1947.919961 | 43.359149 | 9.78556E-07 | 0.001906148 |
| 1947.959961 | 39.199051 | 8.84668E-07 | 0.001723298 |
| 1947.999961 | 32.038277 | 7.23059E-07 | 0.001408519 |
| 1948.039961 | 42.058145 | 9.49194E-07 | 0.001849067 |
| 1948.079961 | 55.492834 | 1.2524E-06  | 0.002439767 |
| 1948.119961 | 63.620831 | 1.43583E-06 | 0.002797176 |
| 1948.159961 | 51.141821 | 1.1542E-06  | 0.002248566 |
| 1948.199961 | 40.94812  | 9.24142E-07 | 0.001800413 |
| 1948.239961 | 45.825763 | 1.03422E-06 | 0.002014916 |
| 1948.279961 | 41.736032 | 9.41924E-07 | 0.001835132 |
| 1948.319961 | 42.838383 | 9.66803E-07 | 0.001883641 |
| 1948.359961 | 49.49138  | 1.11695E-06 | 0.002176224 |
| 1948.399961 | 56.418853 | 1.27329E-06 | 0.002480888 |
| 1948.439961 | 54.289454 | 1.22524E-06 | 0.002387301 |
| 1948.479961 | 51.541883 | 1.16323E-06 | 0.002266527 |
| 1948.519961 | 53.869491 | 1.21576E-06 | 0.002368931 |
| 1948.559961 | 59.302878 | 1.33838E-06 | 0.00260792  |
| 1948.599961 | 57.949137 | 1.30783E-06 | 0.00254844  |
| 1948.639961 | 56.336897 | 1.27145E-06 | 0.002477589 |
| 1948.679961 | 63.92891  | 1.44279E-06 | 0.002811529 |
| 1948.719961 | 60.388943 | 1.36289E-06 | 0.002655899 |
| 1948.759961 | 71.687928 | 1.6179E-06  | 0.003152892 |
| 1948.799961 | 91.508575 | 2.06522E-06 | 0.004024703 |
| 1948.839961 | 86.833414 | 1.95971E-06 | 0.00381916  |
| 1948.879961 | 76.852824 | 1.73446E-06 | 0.003380257 |
| 1948.919961 | 77.153664 | 1.74125E-06 | 0.003393558 |
| 1948.959961 | 78.785862 | 1.77809E-06 | 0.003465421 |
| 1948.999961 | 75.547954 | 1.70501E-06 | 0.003323069 |
| 1949.039961 | 63.683991 | 1.43726E-06 | 0.002801275 |
| 1949.079961 | 62.098594 | 1.40148E-06 | 0.002731594 |
| 1949.119961 | 66.987485 | 1.51181E-06 | 0.002946707 |
| 1949.159961 | 65.515377 | 1.47859E-06 | 0.00288201  |
| 1949.199961 | 60.237604 | 1.35948E-06 | 0.002649896 |
| 1949.239961 | 54.319493 | 1.22592E-06 | 0.002389603 |
| 1949.279961 | 56.871967 | 1.28352E-06 | 0.002501942 |
| 1949.319961 | 52.382533 | 1.1822E-06  | 0.002304488 |
| 1949.359961 | 52.085203 | 1.17549E-06 | 0.002291454 |
| 1949.399961 | 52.541087 | 1.18578E-06 | 0.002311558 |
| 1949.439961 | 51.328479 | 1.15841E-06 | 0.002258255 |
| 1949.479961 | 55.267572 | 1.24731E-06 | 0.00243161  |
| 1949.519961 | 56.187252 | 1.26807E-06 | 0.002472124 |

|             |           |             |             |
|-------------|-----------|-------------|-------------|
| 1949.559961 | 55.361657 | 1.24944E-06 | 0.002435849 |
| 1949.599961 | 60.214333 | 1.35895E-06 | 0.002649416 |
| 1949.639961 | 73.234926 | 1.65281E-06 | 0.003222385 |
| 1949.679961 | 72.56568  | 1.63771E-06 | 0.003193003 |
| 1949.719961 | 63.613248 | 1.43566E-06 | 0.00279914  |
| 1949.759961 | 50.864243 | 1.14794E-06 | 0.002238198 |
| 1949.799961 | 47.070683 | 1.06232E-06 | 0.002071311 |
| 1949.839961 | 57.935662 | 1.30753E-06 | 0.002549469 |
| 1949.879961 | 71.575302 | 1.61535E-06 | 0.003149748 |
| 1949.919961 | 72.246142 | 1.63049E-06 | 0.003179334 |
| 1949.959961 | 56.83306  | 1.28264E-06 | 0.002501102 |
| 1949.999961 | 68.365726 | 1.54292E-06 | 0.003008692 |
| 1950.039961 | 84.076212 | 1.89748E-06 | 0.003700168 |
| 1950.079961 | 91.066225 | 2.05524E-06 | 0.004007878 |
| 1950.119961 | 74.144518 | 1.67334E-06 | 0.003263211 |
| 1950.159961 | 63.368669 | 1.43014E-06 | 0.002789007 |
| 1950.199961 | 71.654144 | 1.61713E-06 | 0.003153735 |
| 1950.239961 | 83.633091 | 1.88748E-06 | 0.003681044 |
| 1950.279961 | 83.880568 | 1.89307E-06 | 0.003692012 |
| 1950.319961 | 64.449565 | 1.45454E-06 | 0.002836812 |
| 1950.359961 | 46.129544 | 1.04108E-06 | 0.00203048  |
| 1950.399961 | 55.197253 | 1.24573E-06 | 0.002429662 |
| 1950.439961 | 73.450501 | 1.65768E-06 | 0.003233197 |
| 1950.479961 | 68.467319 | 1.54521E-06 | 0.003013905 |
| 1950.519961 | 60.99903  | 1.37666E-06 | 0.002685209 |
| 1950.559961 | 68.495442 | 1.54585E-06 | 0.003015267 |
| 1950.599961 | 71.264305 | 1.60834E-06 | 0.00313722  |
| 1950.639961 | 65.625095 | 1.48107E-06 | 0.002889028 |
| 1950.679961 | 72.168551 | 1.62874E-06 | 0.003177158 |
| 1950.719961 | 79.135936 | 1.78599E-06 | 0.003483962 |
| 1950.759961 | 88.515376 | 1.99767E-06 | 0.003896972 |
| 1950.799961 | 79.893538 | 1.80309E-06 | 0.00351746  |
| 1950.839961 | 62.130529 | 1.4022E-06  | 0.002735467 |
| 1950.879961 | 61.399993 | 1.38571E-06 | 0.002703358 |
| 1950.919961 | 61.809028 | 1.39494E-06 | 0.002721423 |
| 1950.959961 | 65.46355  | 1.47742E-06 | 0.002882389 |
| 1950.999961 | 53.401628 | 1.2052E-06  | 0.002351346 |
| 1951.039961 | 42.820363 | 9.66396E-07 | 0.001885477 |
| 1951.079961 | 50.555611 | 1.14097E-06 | 0.002226123 |
| 1951.119961 | 49.70399  | 1.12175E-06 | 0.002188668 |
| 1951.159961 | 48.501392 | 1.09461E-06 | 0.002135757 |
| 1951.199961 | 60.000442 | 1.35413E-06 | 0.002642171 |
| 1951.239961 | 71.925312 | 1.62325E-06 | 0.003167358 |
| 1951.279961 | 73.700374 | 1.66331E-06 | 0.003245593 |
| 1951.319961 | 61.328615 | 1.3841E-06  | 0.002700825 |
| 1951.359961 | 59.465503 | 1.34205E-06 | 0.00261883  |

|             |           |             |             |
|-------------|-----------|-------------|-------------|
| 1951.399961 | 69.901545 | 1.57758E-06 | 0.003078491 |
| 1951.439961 | 82.319415 | 1.85783E-06 | 0.003625453 |
| 1951.479961 | 80.498318 | 1.81673E-06 | 0.003545322 |
| 1951.519961 | 78.286774 | 1.76682E-06 | 0.003447991 |
| 1951.559961 | 60.674093 | 1.36933E-06 | 0.002672329 |
| 1951.599961 | 50.488824 | 1.13946E-06 | 0.002223775 |
| 1951.639961 | 56.033148 | 1.26459E-06 | 0.002468025 |
| 1951.679961 | 57.389731 | 1.29521E-06 | 0.002527828 |
| 1951.719961 | 50.037593 | 1.12928E-06 | 0.002204036 |
| 1951.759961 | 46.333972 | 1.04569E-06 | 0.002040942 |
| 1951.799961 | 51.41096  | 1.16027E-06 | 0.002264622 |
| 1951.839961 | 58.101074 | 1.31126E-06 | 0.00255937  |
| 1951.879961 | 56.161965 | 1.2675E-06  | 0.002474003 |
| 1951.919961 | 60.086548 | 1.35607E-06 | 0.00264694  |
| 1951.959961 | 67.461095 | 1.5225E-06  | 0.002971865 |
| 1951.999961 | 68.804169 | 1.55281E-06 | 0.003031093 |
| 1952.039961 | 67.634727 | 1.52642E-06 | 0.002979636 |
| 1952.079961 | 65.555543 | 1.4795E-06  | 0.002888097 |
| 1952.119961 | 69.830864 | 1.57599E-06 | 0.003076512 |
| 1952.159961 | 64.110878 | 1.44689E-06 | 0.002824567 |
| 1952.199961 | 54.416103 | 1.2281E-06  | 0.002397488 |
| 1952.239961 | 51.95004  | 1.17244E-06 | 0.002288884 |
| 1952.279961 | 57.993516 | 1.30883E-06 | 0.002555208 |
| 1952.319961 | 61.135165 | 1.37974E-06 | 0.002693685 |
| 1952.359961 | 52.988332 | 1.19587E-06 | 0.002334774 |
| 1952.399961 | 43.871992 | 9.9013E-07  | 0.001933129 |
| 1952.439961 | 40.547182 | 9.15093E-07 | 0.001786665 |
| 1952.479961 | 56.243998 | 1.26935E-06 | 0.002478378 |
| 1952.519961 | 59.220557 | 1.33653E-06 | 0.002609593 |
| 1952.559961 | 49.845092 | 1.12493E-06 | 0.002196502 |
| 1952.599961 | 54.748059 | 1.23559E-06 | 0.002412608 |
| 1952.639961 | 58.703014 | 1.32485E-06 | 0.002586946 |
| 1952.679961 | 68.733193 | 1.55121E-06 | 0.003029021 |
| 1952.719961 | 81.389415 | 1.83685E-06 | 0.003586845 |
| 1952.759961 | 76.836663 | 1.7341E-06  | 0.003386274 |
| 1952.799961 | 68.69706  | 1.5504E-06  | 0.003027615 |
| 1952.839961 | 68.237648 | 1.54003E-06 | 0.00300743  |
| 1952.879961 | 73.663808 | 1.66249E-06 | 0.003246643 |
| 1952.919961 | 81.816682 | 1.84649E-06 | 0.003606044 |
| 1952.959961 | 72.912187 | 1.64553E-06 | 0.003213647 |
| 1952.999961 | 59.105151 | 1.33392E-06 | 0.002605148 |
| 1953.039961 | 57.526944 | 1.2983E-06  | 0.002535638 |
| 1953.079961 | 50.352485 | 1.13639E-06 | 0.002219452 |
| 1953.119961 | 54.329831 | 1.22615E-06 | 0.002394815 |
| 1953.159961 | 66.058757 | 1.49085E-06 | 0.002911877 |
| 1953.199961 | 64.201017 | 1.44893E-06 | 0.002830045 |

|             |           |             |             |
|-------------|-----------|-------------|-------------|
| 1953.239961 | 58.132367 | 1.31197E-06 | 0.002562585 |
| 1953.279961 | 53.136959 | 1.19923E-06 | 0.002342426 |
| 1953.319961 | 53.619525 | 1.21012E-06 | 0.002363748 |
| 1953.359961 | 65.702199 | 1.48281E-06 | 0.002896456 |
| 1953.399961 | 69.426272 | 1.56685E-06 | 0.003060693 |
| 1953.439961 | 79.540446 | 1.79512E-06 | 0.003506653 |
| 1953.479961 | 92.125998 | 2.07916E-06 | 0.004061589 |
| 1953.519961 | 74.770402 | 1.68746E-06 | 0.003296494 |
| 1953.559961 | 57.011508 | 1.28667E-06 | 0.002513588 |
| 1953.599961 | 56.456899 | 1.27415E-06 | 0.002489186 |
| 1953.639961 | 64.081751 | 1.44624E-06 | 0.002825424 |
| 1953.679961 | 49.046333 | 1.10691E-06 | 0.002162543 |
| 1953.719961 | 42.240487 | 9.53309E-07 | 0.001862499 |
| 1953.759961 | 51.754855 | 1.16803E-06 | 0.00228206  |
| 1953.799961 | 61.705487 | 1.39261E-06 | 0.002720875 |
| 1953.839961 | 58.441537 | 1.31894E-06 | 0.002577006 |
| 1953.879961 | 47.309916 | 1.06772E-06 | 0.002086195 |
| 1953.919961 | 39.843192 | 8.99205E-07 | 0.001756975 |
| 1953.959961 | 38.594522 | 8.71025E-07 | 0.001701947 |
| 1953.999961 | 44.980624 | 1.01515E-06 | 0.001983603 |
| 1954.039961 | 59.677383 | 1.34684E-06 | 0.00263177  |
| 1954.079961 | 63.272081 | 1.42796E-06 | 0.002790353 |
| 1954.119961 | 61.358244 | 1.38477E-06 | 0.002706007 |
| 1954.159961 | 58.340235 | 1.31666E-06 | 0.00257296  |
| 1954.199961 | 57.835519 | 1.30527E-06 | 0.002550753 |
| 1954.239961 | 58.205647 | 1.31362E-06 | 0.002567129 |
| 1954.279961 | 57.094886 | 1.28855E-06 | 0.002518191 |
| 1954.319961 | 66.197753 | 1.49399E-06 | 0.002919737 |
| 1954.359961 | 70.881569 | 1.5997E-06  | 0.003126386 |
| 1954.399961 | 68.665792 | 1.54969E-06 | 0.003028717 |
| 1954.439961 | 72.191366 | 1.62926E-06 | 0.003184288 |
| 1954.479961 | 76.387456 | 1.72396E-06 | 0.003369442 |
| 1954.519961 | 69.940125 | 1.57845E-06 | 0.003085114 |
| 1954.559961 | 66.33777  | 1.49715E-06 | 0.002926272 |
| 1954.599961 | 77.557605 | 1.75037E-06 | 0.003421267 |
| 1954.639961 | 82.412259 | 1.85993E-06 | 0.003635493 |
| 1954.679961 | 76.248    | 1.72081E-06 | 0.003363635 |
| 1954.719961 | 66.462788 | 1.49997E-06 | 0.002932026 |
| 1954.759961 | 71.445641 | 1.61243E-06 | 0.003151911 |
| 1954.799961 | 76.93247  | 1.73626E-06 | 0.003394038 |
| 1954.839961 | 67.930879 | 1.53311E-06 | 0.002996976 |
| 1954.879961 | 63.78694  | 1.43958E-06 | 0.002814211 |
| 1954.919961 | 60.549891 | 1.36653E-06 | 0.00267145  |
| 1954.959961 | 63.93769  | 1.44298E-06 | 0.002820977 |
| 1954.999961 | 83.333144 | 1.88071E-06 | 0.003676794 |
| 1955.039961 | 77.027462 | 1.7384E-06  | 0.003398646 |

|             |           |             |             |
|-------------|-----------|-------------|-------------|
| 1955.079961 | 66.176895 | 1.49352E-06 | 0.002919952 |
| 1955.119961 | 66.534484 | 1.50159E-06 | 0.00293579  |
| 1955.159961 | 56.881081 | 1.28373E-06 | 0.002509891 |
| 1955.199961 | 49.52117  | 1.11762E-06 | 0.002185178 |
| 1955.239961 | 48.028137 | 1.08393E-06 | 0.00211934  |
| 1955.279961 | 42.286785 | 9.54354E-07 | 0.001866029 |
| 1955.319961 | 48.430968 | 1.09302E-06 | 0.002137203 |
| 1955.359961 | 68.516222 | 1.54632E-06 | 0.003023604 |
| 1955.399961 | 77.848617 | 1.75693E-06 | 0.00343551  |
| 1955.439961 | 70.452585 | 1.59002E-06 | 0.003109182 |
| 1955.479961 | 65.909807 | 1.48749E-06 | 0.002908762 |
| 1955.519961 | 59.848853 | 1.35071E-06 | 0.002641331 |
| 1955.559961 | 59.379192 | 1.34011E-06 | 0.002620657 |
| 1955.599961 | 69.080456 | 1.55905E-06 | 0.003048877 |
| 1955.639961 | 70.188416 | 1.58405E-06 | 0.003097841 |
| 1955.679961 | 56.169963 | 1.26768E-06 | 0.002479172 |
| 1955.719961 | 41.044419 | 9.26315E-07 | 0.001811613 |
| 1955.759961 | 49.427819 | 1.11552E-06 | 0.002181684 |
| 1955.799961 | 72.23757  | 1.6303E-06  | 0.003188543 |
| 1955.839961 | 77.756505 | 1.75486E-06 | 0.003432218 |
| 1955.879961 | 65.219396 | 1.47191E-06 | 0.002878881 |
| 1955.919961 | 60.954831 | 1.37567E-06 | 0.002690692 |
| 1955.959961 | 71.594094 | 1.61578E-06 | 0.003160399 |
| 1955.999961 | 85.203543 | 1.92293E-06 | 0.003761242 |
| 1956.039961 | 85.132135 | 1.92131E-06 | 0.003758166 |
| 1956.079961 | 85.597224 | 1.93181E-06 | 0.003778775 |
| 1956.119961 | 71.180119 | 1.60644E-06 | 0.003142382 |
| 1956.159961 | 75.13106  | 1.6956E-06  | 0.003316871 |
| 1956.199961 | 74.31571  | 1.6772E-06  | 0.003280943 |
| 1956.239961 | 73.088712 | 1.64951E-06 | 0.003226838 |
| 1956.279961 | 74.278185 | 1.67636E-06 | 0.00327942  |
| 1956.319961 | 69.292956 | 1.56385E-06 | 0.003059382 |
| 1956.359961 | 65.307025 | 1.47389E-06 | 0.002883457 |
| 1956.399961 | 68.256422 | 1.54045E-06 | 0.003013741 |
| 1956.439961 | 59.440998 | 1.3415E-06  | 0.002624565 |
| 1956.479961 | 54.663297 | 1.23367E-06 | 0.002413659 |
| 1956.519961 | 65.669282 | 1.48206E-06 | 0.002899688 |
| 1956.559961 | 72.566593 | 1.63773E-06 | 0.003204311 |
| 1956.599961 | 69.965569 | 1.57903E-06 | 0.003089521 |
| 1956.639961 | 65.28329  | 1.47335E-06 | 0.002882821 |
| 1956.679961 | 59.663285 | 1.34652E-06 | 0.002634703 |
| 1956.719961 | 52.290025 | 1.18011E-06 | 0.002309151 |
| 1956.759961 | 44.086753 | 9.94977E-07 | 0.00194693  |
| 1956.799961 | 42.468633 | 9.58458E-07 | 0.00187551  |
| 1956.839961 | 54.489802 | 1.22976E-06 | 0.002406441 |
| 1956.879961 | 72.882875 | 1.64486E-06 | 0.003218803 |

|             |           |             |             |
|-------------|-----------|-------------|-------------|
| 1956.919961 | 72.165467 | 1.62867E-06 | 0.003187185 |
| 1956.959961 | 57.042361 | 1.28737E-06 | 0.002519325 |
| 1956.999961 | 53.805994 | 1.21433E-06 | 0.002376437 |
| 1957.039961 | 57.98863  | 1.30872E-06 | 0.002561222 |
| 1957.079961 | 59.793919 | 1.34947E-06 | 0.002641012 |
| 1957.119961 | 66.560069 | 1.50217E-06 | 0.002939923 |
| 1957.159961 | 64.695297 | 1.46008E-06 | 0.002857615 |
| 1957.199961 | 59.943014 | 1.35283E-06 | 0.002647759 |
| 1957.239961 | 59.747109 | 1.34841E-06 | 0.00263916  |
| 1957.279961 | 74.793153 | 1.68798E-06 | 0.003303844 |
| 1957.319961 | 70.072965 | 1.58145E-06 | 0.003095402 |
| 1957.359961 | 64.524392 | 1.45623E-06 | 0.002850358 |
| 1957.399961 | 79.255122 | 1.78868E-06 | 0.003501158 |
| 1957.439961 | 83.247037 | 1.87877E-06 | 0.003677579 |
| 1957.479961 | 69.756445 | 1.57431E-06 | 0.003081672 |
| 1957.519961 | 61.868374 | 1.39628E-06 | 0.002733252 |
| 1957.559961 | 71.358093 | 1.61045E-06 | 0.003152558 |
| 1957.599961 | 75.759965 | 1.7098E-06  | 0.003347098 |
| 1957.639961 | 73.597931 | 1.661E-06   | 0.003251645 |
| 1957.679961 | 60.372615 | 1.36253E-06 | 0.00266739  |
| 1957.719961 | 56.000793 | 1.26386E-06 | 0.002474284 |
| 1957.759961 | 63.280483 | 1.42815E-06 | 0.00279598  |
| 1957.799961 | 62.073514 | 1.40091E-06 | 0.002742707 |
| 1957.839961 | 67.365639 | 1.52035E-06 | 0.002976599 |
| 1957.879961 | 68.436228 | 1.54451E-06 | 0.003023966 |
| 1957.919961 | 57.13779  | 1.28952E-06 | 0.002524778 |
| 1957.959961 | 47.920746 | 1.0815E-06  | 0.002117542 |
| 1957.999961 | 53.387713 | 1.20489E-06 | 0.002359167 |
| 1958.039961 | 53.113966 | 1.19871E-06 | 0.002347119 |
| 1958.079961 | 65.058449 | 1.46828E-06 | 0.002875007 |
| 1958.119961 | 67.707177 | 1.52806E-06 | 0.002992118 |
| 1958.159961 | 64.937868 | 1.46556E-06 | 0.002869795 |
| 1958.199961 | 65.328462 | 1.47437E-06 | 0.002887116 |
| 1958.239961 | 61.698642 | 1.39245E-06 | 0.002726756 |
| 1958.279961 | 50.182673 | 1.13255E-06 | 0.002217856 |
| 1958.319961 | 38.466921 | 8.68145E-07 | 0.001700105 |
| 1958.359961 | 40.654257 | 9.1751E-07  | 0.001796815 |
| 1958.399961 | 48.224649 | 1.08836E-06 | 0.00213145  |
| 1958.439961 | 59.343226 | 1.33929E-06 | 0.002622927 |
| 1958.479961 | 68.133139 | 1.53767E-06 | 0.003011496 |
| 1958.519961 | 61.51735  | 1.38836E-06 | 0.002719133 |
| 1958.559961 | 58.163974 | 1.31268E-06 | 0.002570962 |
| 1958.599961 | 56.334749 | 1.2714E-06  | 0.002490158 |
| 1958.639961 | 60.97798  | 1.37619E-06 | 0.002695457 |
| 1958.679961 | 73.776774 | 1.66504E-06 | 0.003261279 |
| 1958.719961 | 71.778041 | 1.61993E-06 | 0.00317299  |



|             |           |             |             |
|-------------|-----------|-------------|-------------|
| 1958.759961 | 66.404302 | 1.49865E-06 | 0.002935501 |
| 1958.799961 | 57.514282 | 1.29802E-06 | 0.002542556 |
| 1958.839961 | 50.061927 | 1.12983E-06 | 0.002213152 |
| 1958.879961 | 59.361798 | 1.33971E-06 | 0.002624337 |
| 1958.919961 | 63.333307 | 1.42934E-06 | 0.002799972 |
| 1958.959961 | 60.826421 | 1.37277E-06 | 0.002689197 |
| 1958.999961 | 67.730002 | 1.52857E-06 | 0.002994472 |
| 1959.039961 | 59.815851 | 1.34996E-06 | 0.002644626 |
| 1959.079961 | 47.64208  | 1.07522E-06 | 0.002106433 |
| 1959.119961 | 48.374294 | 1.09174E-06 | 0.00213885  |
| 1959.159961 | 56.703639 | 1.27972E-06 | 0.00250718  |
| 1959.199961 | 63.333167 | 1.42934E-06 | 0.002800366 |
| 1959.239961 | 76.243646 | 1.72071E-06 | 0.003371289 |
| 1959.279961 | 71.481093 | 1.61323E-06 | 0.003160767 |
| 1959.319961 | 59.913463 | 1.35216E-06 | 0.002649321 |
| 1959.359961 | 67.12659  | 1.51495E-06 | 0.002968339 |
| 1959.399961 | 69.273755 | 1.56341E-06 | 0.00306335  |
| 1959.439961 | 63.141414 | 1.42501E-06 | 0.002792229 |
| 1959.479961 | 58.168296 | 1.31278E-06 | 0.002572361 |
| 1959.519961 | 62.6453   | 1.41382E-06 | 0.002770403 |
| 1959.559961 | 58.065596 | 1.31046E-06 | 0.002567924 |
| 1959.599961 | 45.05688  | 1.01687E-06 | 0.00199266  |
| 1959.639961 | 40.806053 | 9.20936E-07 | 0.001804703 |
| 1959.679961 | 40.472267 | 9.13403E-07 | 0.001789977 |
| 1959.719961 | 45.404893 | 1.02473E-06 | 0.002008174 |
| 1959.759961 | 48.054527 | 1.08452E-06 | 0.002125406 |
| 1959.799961 | 43.324098 | 9.77765E-07 | 0.001916223 |
| 1959.839961 | 44.658002 | 1.00787E-06 | 0.001975262 |
| 1959.879961 | 48.964751 | 1.10507E-06 | 0.002165797 |
| 1959.919961 | 59.14873  | 1.3349E-06  | 0.002616306 |
| 1959.959961 | 70.45648  | 1.5901E-06  | 0.003116541 |
| 1959.999961 | 58.533345 | 1.32102E-06 | 0.002589191 |
| 1960.039961 | 48.92748  | 1.10423E-06 | 0.002164325 |
| 1960.079961 | 54.85514  | 1.238E-06   | 0.002426587 |
| 1960.119961 | 59.105937 | 1.33394E-06 | 0.00261468  |
| 1960.159961 | 57.667124 | 1.30147E-06 | 0.002551083 |
| 1960.199961 | 44.66582  | 1.00805E-06 | 0.00197597  |
| 1960.239961 | 40.658215 | 9.17599E-07 | 0.001798715 |
| 1960.279961 | 43.671627 | 9.85608E-07 | 0.001932067 |
| 1960.319961 | 54.847365 | 1.23783E-06 | 0.00242654  |
| 1960.359961 | 61.509524 | 1.38818E-06 | 0.002721341 |
| 1960.399961 | 66.16534  | 1.49326E-06 | 0.002927386 |
| 1960.439961 | 69.990163 | 1.57958E-06 | 0.003096673 |
| 1960.479961 | 70.822322 | 1.59836E-06 | 0.003133555 |
| 1960.519961 | 72.291127 | 1.63151E-06 | 0.003198608 |
| 1960.559961 | 69.771901 | 1.57465E-06 | 0.003087205 |

|             |           |             |             |
|-------------|-----------|-------------|-------------|
| 1960.599961 | 65.04177  | 1.4679E-06  | 0.002877969 |
| 1960.639961 | 46.545706 | 1.05047E-06 | 0.002059597 |
| 1960.679961 | 33.816443 | 7.6319E-07  | 0.001496371 |
| 1960.719961 | 37.235809 | 8.4036E-07  | 0.001647711 |
| 1960.759961 | 41.055713 | 9.2657E-07  | 0.001816782 |
| 1960.799961 | 38.396659 | 8.66559E-07 | 0.001699149 |
| 1960.839961 | 42.281661 | 9.54238E-07 | 0.001871108 |
| 1960.879961 | 43.44772  | 9.80555E-07 | 0.00192275  |
| 1960.919961 | 48.315687 | 1.09042E-06 | 0.002138222 |
| 1960.959961 | 56.423354 | 1.2734E-06  | 0.00249708  |
| 1960.999961 | 46.4565   | 1.04846E-06 | 0.002056027 |
| 1961.039961 | 35.99623  | 8.12385E-07 | 0.001593119 |
| 1961.079961 | 35.288683 | 7.96416E-07 | 0.001561836 |
| 1961.119961 | 42.257219 | 9.53687E-07 | 0.001870294 |
| 1961.159961 | 52.989982 | 1.19591E-06 | 0.002345371 |
| 1961.199961 | 54.094275 | 1.22083E-06 | 0.002394297 |
| 1961.239961 | 50.146296 | 1.13173E-06 | 0.002219598 |
| 1961.279961 | 59.065808 | 1.33303E-06 | 0.002614451 |
| 1961.319961 | 75.273499 | 1.69882E-06 | 0.003331926 |
| 1961.359961 | 87.879778 | 1.98332E-06 | 0.003890013 |
| 1961.399961 | 82.094105 | 1.85275E-06 | 0.003633983 |
| 1961.439961 | 73.31453  | 1.65461E-06 | 0.003245412 |
| 1961.479961 | 79.820779 | 1.80144E-06 | 0.003533496 |
| 1961.519961 | 70.960099 | 1.60147E-06 | 0.003141317 |
| 1961.559961 | 60.317594 | 1.36128E-06 | 0.00267024  |
| 1961.599961 | 58.873135 | 1.32868E-06 | 0.002606348 |
| 1961.639961 | 58.72438  | 1.32533E-06 | 0.002599815 |
| 1961.679961 | 63.915533 | 1.44248E-06 | 0.002829693 |
| 1961.719961 | 77.124301 | 1.74059E-06 | 0.003414546 |
| 1961.759961 | 79.16206  | 1.78658E-06 | 0.003504836 |
| 1961.799961 | 76.072266 | 1.71685E-06 | 0.003368107 |
| 1961.839961 | 81.048342 | 1.82915E-06 | 0.003588496 |
| 1961.879961 | 76.818265 | 1.73368E-06 | 0.003401274 |
| 1961.919961 | 73.119696 | 1.65021E-06 | 0.003237579 |
| 1961.959961 | 73.221622 | 1.65251E-06 | 0.003242158 |
| 1961.999961 | 76.936408 | 1.73635E-06 | 0.003406714 |
| 1962.039961 | 75.324996 | 1.69998E-06 | 0.003335429 |
| 1962.079961 | 59.153371 | 1.33501E-06 | 0.002619395 |
| 1962.119961 | 53.529412 | 1.20808E-06 | 0.002370406 |
| 1962.159961 | 60.230366 | 1.35932E-06 | 0.002667194 |
| 1962.199961 | 53.788074 | 1.21392E-06 | 0.002381958 |
| 1962.239961 | 54.163397 | 1.22239E-06 | 0.002398627 |
| 1962.279961 | 57.935945 | 1.30753E-06 | 0.002565747 |
| 1962.319961 | 59.441424 | 1.34151E-06 | 0.002632472 |
| 1962.359961 | 69.761986 | 1.57443E-06 | 0.0030896   |
| 1962.399961 | 86.142247 | 1.94411E-06 | 0.003815122 |

|             |            |             |             |
|-------------|------------|-------------|-------------|
| 1962.439961 | 89.931157  | 2.02962E-06 | 0.003983009 |
| 1962.479961 | 67.32267   | 1.51938E-06 | 0.002981751 |
| 1962.519961 | 58.273409  | 1.31515E-06 | 0.002581007 |
| 1962.559961 | 56.123312  | 1.26662E-06 | 0.002485827 |
| 1962.599961 | 61.685457  | 1.39215E-06 | 0.002732243 |
| 1962.639961 | 69.764204  | 1.57448E-06 | 0.003090139 |
| 1962.679961 | 61.580443  | 1.38978E-06 | 0.002727703 |
| 1962.719961 | 40.268622  | 9.08807E-07 | 0.001783733 |
| 1962.759961 | 34.858907  | 7.86717E-07 | 0.001544137 |
| 1962.799961 | 51.519952  | 1.16273E-06 | 0.002282213 |
| 1962.839961 | 51.71718   | 1.16718E-06 | 0.002290997 |
| 1962.879961 | 44.444098  | 1.00304E-06 | 0.00196885  |
| 1962.919961 | 46.74429   | 1.05495E-06 | 0.002070789 |
| 1962.959961 | 67.679152  | 1.52742E-06 | 0.002998273 |
| 1962.999961 | 80.609611  | 1.81925E-06 | 0.003571181 |
| 1963.039961 | 87.833995  | 1.98229E-06 | 0.003891316 |
| 1963.079961 | 84.75316   | 1.91276E-06 | 0.003754902 |
| 1963.119961 | 74.162164  | 1.67374E-06 | 0.003285746 |
| 1963.159961 | 67.744274  | 1.52889E-06 | 0.003001463 |
| 1963.199961 | 67.983903  | 1.5343E-06  | 0.003012142 |
| 1963.239961 | 75.712912  | 1.70873E-06 | 0.003354657 |
| 1963.279961 | 100.06822  | 2.2584E-06  | 0.004433872 |
| 1963.319961 | 106.801377 | 2.41036E-06 | 0.004732305 |
| 1963.359961 | 111.911673 | 2.52569E-06 | 0.00495884  |
| 1963.399961 | 110.926358 | 2.50345E-06 | 0.00491528  |
| 1963.439961 | 116.150708 | 2.62136E-06 | 0.005146882 |
| 1963.479961 | 119.287088 | 2.69214E-06 | 0.00528597  |
| 1963.519961 | 111.050696 | 2.50626E-06 | 0.004921091 |
| 1963.559961 | 103.093628 | 2.32668E-06 | 0.004568575 |
| 1963.599961 | 109.231136 | 2.46519E-06 | 0.004840656 |
| 1963.639961 | 110.964149 | 2.50431E-06 | 0.004917556 |
| 1963.679961 | 101.628811 | 2.29362E-06 | 0.004503937 |
| 1963.719961 | 95.232338  | 2.14926E-06 | 0.004220547 |
| 1963.759961 | 91.71063   | 2.06978E-06 | 0.004064553 |
| 1963.799961 | 88.547707  | 1.9984E-06  | 0.003924455 |
| 1963.839961 | 82.438112  | 1.86051E-06 | 0.00365375  |
| 1963.879961 | 65.391475  | 1.47579E-06 | 0.002898283 |
| 1963.919961 | 62.443607  | 1.40927E-06 | 0.002767684 |
| 1963.959961 | 65.813851  | 1.48533E-06 | 0.002917123 |
| 1963.999961 | 68.418256  | 1.5441E-06  | 0.003032622 |
| 1964.039961 | 59.915574  | 1.35221E-06 | 0.002655797 |
| 1964.079961 | 49.050075  | 1.10699E-06 | 0.002174221 |
| 1964.119961 | 58.106783  | 1.31139E-06 | 0.002575726 |
| 1964.159961 | 75.376669  | 1.70115E-06 | 0.003341324 |
| 1964.199961 | 89.732838  | 2.02515E-06 | 0.00397779  |
| 1964.239961 | 85.621478  | 1.93236E-06 | 0.003795614 |

|             |            |             |             |
|-------------|------------|-------------|-------------|
| 1964.279961 | 75.164489  | 1.69636E-06 | 0.003332122 |
| 1964.319961 | 73.113322  | 1.65007E-06 | 0.003241257 |
| 1964.359961 | 78.309995  | 1.76735E-06 | 0.003471707 |
| 1964.399961 | 98.821073  | 2.23025E-06 | 0.004381111 |
| 1964.439961 | 116.316819 | 2.62511E-06 | 0.005156868 |
| 1964.479961 | 113.053282 | 2.55146E-06 | 0.005012282 |
| 1964.519961 | 110.865301 | 2.50208E-06 | 0.004915377 |
| 1964.559961 | 120.620766 | 2.72224E-06 | 0.005348009 |
| 1964.599961 | 117.450375 | 2.65069E-06 | 0.005207548 |
| 1964.639961 | 98.759558  | 2.22887E-06 | 0.004378919 |
| 1964.679961 | 77.100973  | 1.74006E-06 | 0.003418664 |
| 1964.719961 | 66.842867  | 1.50855E-06 | 0.002963879 |
| 1964.759961 | 65.422599  | 1.4765E-06  | 0.002900962 |
| 1964.799961 | 71.788174  | 1.62016E-06 | 0.003183289 |
| 1964.839961 | 89.945125  | 2.02994E-06 | 0.0039885   |
| 1964.879961 | 102.009706 | 2.30222E-06 | 0.00452358  |
| 1964.919961 | 91.470001  | 2.06435E-06 | 0.004056284 |
| 1964.959961 | 70.290398  | 1.58636E-06 | 0.003117127 |
| 1964.999961 | 54.483022  | 1.22961E-06 | 0.002416176 |
| 1965.039961 | 47.705731  | 1.07665E-06 | 0.002115664 |
| 1965.079961 | 49.344429  | 1.11364E-06 | 0.002188382 |
| 1965.119961 | 51.884784  | 1.17097E-06 | 0.002301091 |
| 1965.159961 | 60.542677  | 1.36636E-06 | 0.002685124 |
| 1965.199961 | 74.833499  | 1.68889E-06 | 0.003319002 |
| 1965.239961 | 72.35055   | 1.63285E-06 | 0.003208944 |
| 1965.279961 | 74.170161  | 1.67392E-06 | 0.003289716 |
| 1965.319961 | 86.037134  | 1.94174E-06 | 0.003816137 |
| 1965.359961 | 87.348915  | 1.97134E-06 | 0.003874399 |
| 1965.399961 | 81.736295  | 1.84467E-06 | 0.003625523 |
| 1965.439961 | 79.104347  | 1.78527E-06 | 0.003508851 |
| 1965.479961 | 80.045537  | 1.80652E-06 | 0.003550672 |
| 1965.519961 | 74.466982  | 1.68062E-06 | 0.003303284 |
| 1965.559961 | 63.21182   | 1.4266E-06  | 0.002804073 |
| 1965.599961 | 66.983553  | 1.51173E-06 | 0.002971448 |
| 1965.639961 | 69.66379   | 1.57221E-06 | 0.003090408 |
| 1965.679961 | 62.269805  | 1.40534E-06 | 0.002762454 |
| 1965.719961 | 58.430669  | 1.3187E-06  | 0.002592193 |
| 1965.759961 | 49.735526  | 1.12246E-06 | 0.00220649  |
| 1965.799961 | 45.962041  | 1.0373E-06  | 0.002039123 |
| 1965.839961 | 50.302555  | 1.13526E-06 | 0.002231737 |
| 1965.879961 | 52.135542  | 1.17663E-06 | 0.002313107 |
| 1965.919961 | 59.204265  | 1.33616E-06 | 0.002626779 |
| 1965.959961 | 68.10652   | 1.53707E-06 | 0.003021817 |
| 1965.999961 | 61.982844  | 1.39887E-06 | 0.002750171 |
| 1966.039961 | 56.46845   | 1.27441E-06 | 0.002505549 |
| 1966.079961 | 53.054782  | 1.19737E-06 | 0.00235413  |

|             |           |             |             |
|-------------|-----------|-------------|-------------|
| 1966.119961 | 45.41422  | 1.02494E-06 | 0.002015147 |
| 1966.159961 | 55.082267 | 1.24313E-06 | 0.002444193 |
| 1966.199961 | 66.225361 | 1.49461E-06 | 0.00293871  |
| 1966.239961 | 68.031351 | 1.53537E-06 | 0.003018911 |
| 1966.279961 | 66.266408 | 1.49554E-06 | 0.002940651 |
| 1966.319961 | 69.601361 | 1.57081E-06 | 0.003088707 |
| 1966.359961 | 71.870217 | 1.62201E-06 | 0.003189457 |
| 1966.399961 | 75.56602  | 1.70542E-06 | 0.003353537 |
| 1966.439961 | 81.444491 | 1.83809E-06 | 0.003614491 |
| 1966.479961 | 70.960506 | 1.60148E-06 | 0.003149278 |
| 1966.519961 | 64.4547   | 1.45465E-06 | 0.002860604 |
| 1966.559961 | 78.789533 | 1.77817E-06 | 0.003496878 |
| 1966.599961 | 80.254911 | 1.81124E-06 | 0.003561988 |
| 1966.639961 | 56.13276  | 1.26684E-06 | 0.002491415 |
| 1966.679961 | 54.919037 | 1.23945E-06 | 0.002437594 |
| 1966.719961 | 58.543634 | 1.32125E-06 | 0.002598525 |
| 1966.759961 | 54.211585 | 1.22348E-06 | 0.002406291 |
| 1966.799961 | 63.475098 | 1.43254E-06 | 0.002817529 |
| 1966.839961 | 59.317924 | 1.33872E-06 | 0.002633054 |
| 1966.879961 | 61.743377 | 1.39346E-06 | 0.002740773 |
| 1966.919961 | 69.318159 | 1.56441E-06 | 0.003077078 |
| 1966.959961 | 67.859155 | 1.53149E-06 | 0.003012373 |
| 1966.999961 | 58.815455 | 1.32738E-06 | 0.002610962 |
| 1967.039961 | 50.546935 | 1.14077E-06 | 0.002243948 |
| 1967.079961 | 46.681732 | 1.05354E-06 | 0.002072401 |
| 1967.119961 | 50.801831 | 1.14653E-06 | 0.002255355 |
| 1967.159961 | 78.005922 | 1.76049E-06 | 0.003463156 |
| 1967.199961 | 95.64238  | 2.15852E-06 | 0.004246231 |
| 1967.23996  | 82.621547 | 1.86465E-06 | 0.00366822  |
| 1967.27996  | 68.613512 | 1.54851E-06 | 0.003046355 |
| 1967.31996  | 62.043252 | 1.40023E-06 | 0.0027547   |
| 1967.35996  | 65.630499 | 1.48119E-06 | 0.002914032 |
| 1967.39996  | 68.899271 | 1.55496E-06 | 0.003059229 |
| 1967.43996  | 69.582746 | 1.57039E-06 | 0.003089639 |
| 1967.47996  | 76.044066 | 1.71621E-06 | 0.003376606 |
| 1967.51996  | 71.819859 | 1.62087E-06 | 0.003189102 |
| 1967.55996  | 62.688651 | 1.4148E-06  | 0.002783695 |
| 1967.59996  | 70.064829 | 1.58127E-06 | 0.003111298 |
| 1967.63996  | 73.152709 | 1.65095E-06 | 0.003248485 |
| 1967.67996  | 81.820296 | 1.84657E-06 | 0.003633459 |
| 1967.71996  | 70.094805 | 1.58194E-06 | 0.003112819 |
| 1967.75996  | 50.942621 | 1.1497E-06  | 0.002262341 |
| 1967.79996  | 51.48695  | 1.16199E-06 | 0.002286561 |
| 1967.83996  | 55.981199 | 1.26342E-06 | 0.002486204 |
| 1967.87996  | 55.637854 | 1.25567E-06 | 0.002471006 |
| 1967.91996  | 58.534    | 1.32103E-06 | 0.002599683 |

|            |            |             |             |
|------------|------------|-------------|-------------|
| 1967.95996 | 57.554418  | 1.29892E-06 | 0.002556229 |
| 1967.99996 | 55.60271   | 1.25488E-06 | 0.002469595 |
| 1968.03996 | 64.227085  | 1.44952E-06 | 0.002852705 |
| 1968.07996 | 71.425131  | 1.61197E-06 | 0.003172477 |
| 1968.11996 | 69.464705  | 1.56772E-06 | 0.003085464 |
| 1968.15996 | 72.205277  | 1.62957E-06 | 0.003207259 |
| 1968.19996 | 75.778954  | 1.71023E-06 | 0.003366066 |
| 1968.23996 | 69.506461  | 1.56866E-06 | 0.003087507 |
| 1968.27996 | 70.383154  | 1.58845E-06 | 0.003126514 |
| 1968.31996 | 68.992401  | 1.55706E-06 | 0.003064797 |
| 1968.35996 | 66.348548  | 1.49739E-06 | 0.002947411 |
| 1968.39996 | 66.240862  | 1.49496E-06 | 0.002942687 |
| 1968.43996 | 71.649892  | 1.61704E-06 | 0.003183043 |
| 1968.47996 | 64.785482  | 1.46212E-06 | 0.00287815  |
| 1968.51996 | 59.46522   | 1.34205E-06 | 0.002641847 |
| 1968.55996 | 69.409397  | 1.56647E-06 | 0.003083697 |
| 1968.59996 | 66.408816  | 1.49875E-06 | 0.002950448 |
| 1968.63996 | 73.182846  | 1.65163E-06 | 0.003251474 |
| 1968.67996 | 74.398448  | 1.67907E-06 | 0.00330555  |
| 1968.71996 | 70.124267  | 1.58261E-06 | 0.00311571  |
| 1968.75996 | 70.259578  | 1.58566E-06 | 0.003121786 |
| 1968.79996 | 75.944557  | 1.71396E-06 | 0.00337445  |
| 1968.83996 | 85.796636  | 1.93631E-06 | 0.003812286 |
| 1968.87996 | 94.092875  | 2.12355E-06 | 0.004181005 |
| 1968.91996 | 91.387937  | 2.0625E-06  | 0.004060894 |
| 1968.95996 | 95.557389  | 2.1566E-06  | 0.004246253 |
| 1968.99996 | 107.127754 | 2.41772E-06 | 0.004760499 |
| 1969.03996 | 97.913706  | 2.20978E-06 | 0.004351137 |
| 1969.07996 | 77.415554  | 1.74716E-06 | 0.0034403   |
| 1969.11996 | 61.593877  | 1.39009E-06 | 0.00273725  |
| 1969.15996 | 50.612807  | 1.14226E-06 | 0.002249294 |
| 1969.19996 | 60.128401  | 1.35701E-06 | 0.002672232 |
| 1969.23996 | 75.2303    | 1.69784E-06 | 0.00334346  |
| 1969.27996 | 73.919947  | 1.66827E-06 | 0.003285291 |
| 1969.31996 | 62.695568  | 1.41495E-06 | 0.002786493 |
| 1969.35996 | 50.576059  | 1.14143E-06 | 0.002247889 |
| 1969.39996 | 42.721384  | 9.64162E-07 | 0.001898821 |
| 1969.43996 | 48.015236  | 1.08364E-06 | 0.002134158 |
| 1969.47996 | 56.622333  | 1.27789E-06 | 0.002516773 |
| 1969.51996 | 59.244489  | 1.33707E-06 | 0.002633377 |
| 1969.55996 | 56.826004  | 1.28248E-06 | 0.002525929 |
| 1969.59996 | 62.010364  | 1.39949E-06 | 0.002756431 |
| 1969.63996 | 73.451025  | 1.65769E-06 | 0.003265047 |
| 1969.67996 | 69.993377  | 1.57965E-06 | 0.003111411 |
| 1969.71996 | 59.917698  | 1.35226E-06 | 0.002663572 |
| 1969.75996 | 60.716666  | 1.37029E-06 | 0.002699144 |

|            |           |             |             |
|------------|-----------|-------------|-------------|
| 1969.79996 | 53.426297 | 1.20576E-06 | 0.0023751   |
| 1969.83996 | 43.620803 | 9.84461E-07 | 0.00193923  |
| 1969.87996 | 55.355745 | 1.2493E-06  | 0.002460975 |
| 1969.91996 | 81.073812 | 1.82972E-06 | 0.003604408 |
| 1969.95996 | 76.199999 | 1.71973E-06 | 0.003387795 |
| 1969.99996 | 56.314037 | 1.27093E-06 | 0.002503731 |
| 1970.03996 | 41.922751 | 9.46138E-07 | 0.00186393  |
| 1970.07996 | 38.410284 | 8.66867E-07 | 0.001707797 |
| 1970.11996 | 39.207618 | 8.84861E-07 | 0.001743283 |
| 1970.15996 | 42.467374 | 9.58429E-07 | 0.001888259 |
| 1970.19996 | 54.174028 | 1.22263E-06 | 0.00240883  |
| 1970.23996 | 75.565283 | 1.7054E-06  | 0.003360054 |
| 1970.27996 | 88.693482 | 2.00169E-06 | 0.003943886 |
| 1970.31996 | 79.557136 | 1.79549E-06 | 0.003537697 |
| 1970.35996 | 72.314647 | 1.63204E-06 | 0.003215708 |
| 1970.39996 | 60.06398  | 1.35556E-06 | 0.002670996 |
| 1970.43996 | 50.37834  | 1.13697E-06 | 0.002240329 |
| 1970.47996 | 49.259481 | 1.11172E-06 | 0.002190618 |
| 1970.51996 | 49.622789 | 1.11992E-06 | 0.002206819 |
| 1970.55996 | 56.355021 | 1.27185E-06 | 0.002506265 |
| 1970.59996 | 64.273113 | 1.45055E-06 | 0.002858463 |
| 1970.63996 | 67.3257   | 1.51945E-06 | 0.002994284 |
| 1970.67996 | 58.917459 | 1.32968E-06 | 0.002620384 |
| 1970.71996 | 43.618723 | 9.84414E-07 | 0.001940004 |
| 1970.75996 | 46.23548  | 1.04347E-06 | 0.00205643  |
| 1970.79996 | 42.657105 | 9.62711E-07 | 0.001897312 |
| 1970.83996 | 32.414338 | 7.31546E-07 | 0.001441761 |
| 1970.87996 | 35.004022 | 7.89992E-07 | 0.001556979 |
| 1970.91996 | 39.941962 | 9.01434E-07 | 0.001776655 |
| 1970.95996 | 55.753899 | 1.25829E-06 | 0.002480035 |
| 1970.99996 | 62.304907 | 1.40613E-06 | 0.002771492 |
| 1971.03996 | 59.605081 | 1.3452E-06  | 0.00265145  |
| 1971.07996 | 55.846322 | 1.26037E-06 | 0.002484297 |
| 1971.11996 | 71.904451 | 1.62278E-06 | 0.003198701 |
| 1971.15996 | 80.147839 | 1.80883E-06 | 0.003565484 |
| 1971.19996 | 65.380504 | 1.47555E-06 | 0.002908598 |
| 1971.23996 | 55.661824 | 1.25621E-06 | 0.002476291 |
| 1971.27996 | 53.788126 | 1.21392E-06 | 0.002392982 |
| 1971.31996 | 54.131921 | 1.22168E-06 | 0.002408326 |
| 1971.35996 | 55.575574 | 1.25426E-06 | 0.002472604 |
| 1971.39996 | 52.231507 | 1.17879E-06 | 0.002323871 |
| 1971.43996 | 48.078718 | 1.08507E-06 | 0.00213915  |
| 1971.47996 | 52.718627 | 1.18979E-06 | 0.002345639 |
| 1971.51996 | 57.040477 | 1.28732E-06 | 0.002537985 |
| 1971.55996 | 59.352645 | 1.33951E-06 | 0.002640917 |
| 1971.59996 | 45.842532 | 1.0346E-06  | 0.002039821 |

|            |           |             |             |
|------------|-----------|-------------|-------------|
| 1971.63996 | 30.943452 | 6.98351E-07 | 0.001376896 |
| 1971.67996 | 43.472759 | 9.8112E-07  | 0.001934454 |
| 1971.71996 | 56.681739 | 1.27923E-06 | 0.002522279 |
| 1971.75996 | 63.356145 | 1.42986E-06 | 0.002819341 |
| 1971.79996 | 73.414937 | 1.65687E-06 | 0.003267022 |
| 1971.83996 | 81.77096  | 1.84546E-06 | 0.003638945 |
| 1971.87996 | 76.389357 | 1.724E-06   | 0.003399524 |
| 1971.91996 | 63.96395  | 1.44358E-06 | 0.002846619 |
| 1971.95996 | 65.101346 | 1.46925E-06 | 0.002897296 |
| 1971.99996 | 69.25892  | 1.56308E-06 | 0.003082388 |
| 1972.03996 | 60.285717 | 1.36056E-06 | 0.002683088 |
| 1972.07996 | 57.010505 | 1.28665E-06 | 0.002537372 |
| 1972.11996 | 67.978743 | 1.53419E-06 | 0.003025598 |
| 1972.15996 | 71.431637 | 1.61211E-06 | 0.003179344 |
| 1972.19996 | 67.789201 | 1.52991E-06 | 0.003017284 |
| 1972.23996 | 59.213823 | 1.33637E-06 | 0.002635649 |
| 1972.27996 | 52.357597 | 1.18164E-06 | 0.002330521 |
| 1972.31996 | 43.677472 | 9.8574E-07  | 0.001944194 |
| 1972.35996 | 39.766982 | 8.97485E-07 | 0.001770164 |
| 1972.39996 | 40.829744 | 9.2147E-07  | 0.001817508 |
| 1972.43996 | 44.567964 | 1.00584E-06 | 0.001983953 |
| 1972.47996 | 49.07715  | 1.1076E-06  | 0.002184725 |
| 1972.51996 | 54.97656  | 1.24074E-06 | 0.002447393 |
| 1972.55996 | 53.978931 | 1.21823E-06 | 0.00240303  |
| 1972.59996 | 51.732128 | 1.16752E-06 | 0.002303054 |
| 1972.63996 | 61.614424 | 1.39055E-06 | 0.002743058 |
| 1972.67996 | 79.705925 | 1.79885E-06 | 0.003548559 |
| 1972.71996 | 86.572376 | 1.95382E-06 | 0.003854336 |
| 1972.75996 | 76.848546 | 1.73436E-06 | 0.003421485 |
| 1972.79996 | 59.47665  | 1.34231E-06 | 0.0026481   |
| 1972.83996 | 46.67079  | 1.05329E-06 | 0.002077982 |
| 1972.87996 | 54.887425 | 1.23873E-06 | 0.002443871 |
| 1972.91996 | 75.105279 | 1.69502E-06 | 0.003344142 |
| 1972.95996 | 87.221497 | 1.96847E-06 | 0.003883708 |
| 1972.99996 | 76.133291 | 1.71822E-06 | 0.003390053 |
| 1973.03996 | 64.866923 | 1.46396E-06 | 0.002888444 |
| 1973.07996 | 61.094505 | 1.37882E-06 | 0.002720518 |
| 1973.11996 | 57.721351 | 1.30269E-06 | 0.002570365 |
| 1973.15996 | 56.924872 | 1.28472E-06 | 0.002534948 |
| 1973.19996 | 67.59722  | 1.52558E-06 | 0.003010265 |
| 1973.23996 | 66.935116 | 1.51063E-06 | 0.00298084  |
| 1973.27996 | 58.427462 | 1.31863E-06 | 0.002602019 |
| 1973.31996 | 58.398731 | 1.31798E-06 | 0.002600792 |
| 1973.35996 | 63.959571 | 1.44348E-06 | 0.002848503 |
| 1973.39996 | 50.032434 | 1.12916E-06 | 0.002228289 |
| 1973.43996 | 54.360883 | 1.22685E-06 | 0.002421114 |



|            |           |             |             |
|------------|-----------|-------------|-------------|
| 1973.47996 | 71.745505 | 1.6192E-06  | 0.003195451 |
| 1973.51996 | 69.765805 | 1.57452E-06 | 0.003107341 |
| 1973.55996 | 60.632697 | 1.3684E-06  | 0.002700611 |
| 1973.59996 | 50.338139 | 1.13606E-06 | 0.002242131 |
| 1973.63996 | 45.537096 | 1.02771E-06 | 0.002028327 |
| 1973.67996 | 56.065465 | 1.26532E-06 | 0.002497336 |
| 1973.71996 | 60.380715 | 1.36271E-06 | 0.002689605 |
| 1973.75996 | 53.881358 | 1.21603E-06 | 0.002400146 |
| 1973.79996 | 47.575674 | 1.07372E-06 | 0.002119302 |
| 1973.83996 | 45.932249 | 1.03663E-06 | 0.002046136 |
| 1973.87996 | 46.318657 | 1.04535E-06 | 0.002063391 |
| 1973.91996 | 40.281618 | 9.091E-07   | 0.001794491 |
| 1973.95996 | 50.853991 | 1.1477E-06  | 0.002265521 |
| 1973.99996 | 72.683636 | 1.64037E-06 | 0.003238087 |
| 1974.03996 | 72.904967 | 1.64536E-06 | 0.003248013 |
| 1974.07996 | 63.461493 | 1.43224E-06 | 0.002827351 |
| 1974.11996 | 62.999592 | 1.42181E-06 | 0.00280683  |
| 1974.15996 | 64.895985 | 1.46461E-06 | 0.002891378 |
| 1974.19996 | 65.171192 | 1.47082E-06 | 0.002903699 |
| 1974.23996 | 57.363936 | 1.29462E-06 | 0.002555899 |
| 1974.27996 | 55.566707 | 1.25406E-06 | 0.002475872 |
| 1974.31996 | 53.262801 | 1.20207E-06 | 0.002373265 |
| 1974.35996 | 60.951624 | 1.37559E-06 | 0.002715916 |
| 1974.39996 | 71.569048 | 1.61521E-06 | 0.003189078 |
| 1974.43996 | 72.216703 | 1.62983E-06 | 0.003218002 |
| 1974.47996 | 63.613902 | 1.43568E-06 | 0.002834716 |
| 1974.51996 | 45.109061 | 1.01805E-06 | 0.002010157 |
| 1974.55996 | 41.779373 | 9.42902E-07 | 0.001861817 |
| 1974.59996 | 57.810073 | 1.30469E-06 | 0.002576246 |
| 1974.63996 | 64.616861 | 1.45831E-06 | 0.002879642 |
| 1974.67996 | 62.543196 | 1.41151E-06 | 0.002787286 |
| 1974.71996 | 54.046441 | 1.21975E-06 | 0.00240867  |
| 1974.75996 | 58.410932 | 1.31825E-06 | 0.002603234 |
| 1974.79996 | 56.871306 | 1.28351E-06 | 0.002534668 |
| 1974.83996 | 54.257915 | 1.22453E-06 | 0.002418242 |
| 1974.87996 | 53.856873 | 1.21547E-06 | 0.002400416 |
| 1974.91996 | 61.478109 | 1.38748E-06 | 0.002740153 |
| 1974.95996 | 58.123966 | 1.31178E-06 | 0.002590707 |
| 1974.99996 | 53.557518 | 1.20872E-06 | 0.002387219 |
| 1975.03996 | 44.72284  | 1.00933E-06 | 0.001993471 |
| 1975.07996 | 39.645962 | 8.94754E-07 | 0.001767211 |
| 1975.11996 | 41.513079 | 9.36892E-07 | 0.001850475 |
| 1975.15996 | 46.330245 | 1.04561E-06 | 0.002065245 |
| 1975.19996 | 63.055734 | 1.42308E-06 | 0.002810868 |
| 1975.23996 | 74.01835  | 1.67049E-06 | 0.003299621 |
| 1975.27996 | 85.649447 | 1.93299E-06 | 0.003818194 |

|            |           |             |             |
|------------|-----------|-------------|-------------|
| 1975.31996 | 89.69745  | 2.02435E-06 | 0.003998732 |
| 1975.35996 | 74.876933 | 1.68987E-06 | 0.003338098 |
| 1975.39996 | 58.793369 | 1.32688E-06 | 0.002621127 |
| 1975.43996 | 50.856694 | 1.14776E-06 | 0.00226734  |
| 1975.47996 | 50.850671 | 1.14763E-06 | 0.002267118 |
| 1975.51996 | 51.865098 | 1.17052E-06 | 0.002312392 |
| 1975.55996 | 52.286278 | 1.18003E-06 | 0.002331217 |
| 1975.59996 | 50.535103 | 1.14051E-06 | 0.002253185 |
| 1975.63996 | 63.8433   | 1.44085E-06 | 0.002846609 |
| 1975.67996 | 69.91373  | 1.57786E-06 | 0.003117337 |
| 1975.71996 | 69.0528   | 1.55843E-06 | 0.003079012 |
| 1975.75996 | 58.489895 | 1.32004E-06 | 0.002608073 |
| 1975.79996 | 54.284687 | 1.22513E-06 | 0.002420611 |
| 1975.83996 | 57.804894 | 1.30458E-06 | 0.002577633 |
| 1975.87996 | 63.409979 | 1.43107E-06 | 0.002827632 |
| 1975.91996 | 58.37     | 1.31733E-06 | 0.002602938 |
| 1975.95996 | 59.427238 | 1.34119E-06 | 0.002650138 |
| 1975.99996 | 59.898881 | 1.35183E-06 | 0.002671225 |
| 1976.03996 | 60.12452  | 1.35693E-06 | 0.002681341 |
| 1976.07996 | 60.007842 | 1.35429E-06 | 0.002676192 |
| 1976.11996 | 64.227321 | 1.44952E-06 | 0.002864428 |
| 1976.15996 | 61.322882 | 1.38397E-06 | 0.00273495  |
| 1976.19996 | 69.473742 | 1.56793E-06 | 0.003098534 |
| 1976.23996 | 73.38242  | 1.65614E-06 | 0.003272928 |
| 1976.27996 | 71.173494 | 1.60629E-06 | 0.003174472 |
| 1976.31996 | 69.821828 | 1.57578E-06 | 0.003114248 |
| 1976.35996 | 59.917504 | 1.35225E-06 | 0.002672542 |
| 1976.39996 | 65.608076 | 1.48068E-06 | 0.002926422 |
| 1976.43996 | 75.176391 | 1.69663E-06 | 0.00335328  |
| 1976.47996 | 69.677676 | 1.57253E-06 | 0.00310807  |
| 1976.51996 | 73.59235  | 1.66088E-06 | 0.003282756 |
| 1976.55996 | 71.199457 | 1.60687E-06 | 0.00317608  |
| 1976.59996 | 72.833972 | 1.64376E-06 | 0.003249059 |
| 1976.63996 | 63.455361 | 1.4321E-06  | 0.002830744 |
| 1976.67996 | 45.993282 | 1.038E-06   | 0.002051802 |
| 1976.71996 | 35.822239 | 8.08458E-07 | 0.001598095 |
| 1976.75996 | 34.948682 | 7.88743E-07 | 0.001559156 |
| 1976.79996 | 41.01874  | 9.25736E-07 | 0.001829995 |
| 1976.83996 | 45.745974 | 1.03242E-06 | 0.002040935 |
| 1976.87996 | 47.047216 | 1.06179E-06 | 0.002099032 |
| 1976.91996 | 49.065238 | 1.10733E-06 | 0.002189111 |
| 1976.95996 | 44.588281 | 1.0063E-06  | 0.001989406 |
| 1976.99996 | 42.173229 | 9.51791E-07 | 0.001881691 |
| 1977.03996 | 42.533913 | 9.59931E-07 | 0.001897822 |
| 1977.07996 | 41.926059 | 9.46213E-07 | 0.001870738 |
| 1977.11996 | 51.387396 | 1.15974E-06 | 0.002292949 |

|            |           |             |             |
|------------|-----------|-------------|-------------|
| 1977.15996 | 67.309127 | 1.51907E-06 | 0.003003451 |
| 1977.19996 | 64.906213 | 1.46484E-06 | 0.002896287 |
| 1977.23996 | 55.764467 | 1.25853E-06 | 0.002488409 |
| 1977.27996 | 52.26733  | 1.1796E-06  | 0.002332401 |
| 1977.31996 | 52.868642 | 1.19317E-06 | 0.002359282 |
| 1977.35996 | 58.325538 | 1.31633E-06 | 0.002602851 |
| 1977.39996 | 67.424171 | 1.52167E-06 | 0.003008949 |
| 1977.43996 | 72.124916 | 1.62776E-06 | 0.003218795 |
| 1977.47996 | 69.972188 | 1.57917E-06 | 0.003122787 |
| 1977.51996 | 71.949941 | 1.62381E-06 | 0.003211117 |
| 1977.55996 | 83.25962  | 1.87905E-06 | 0.003715941 |
| 1977.59996 | 90.84646  | 2.05028E-06 | 0.00405463  |
| 1977.63996 | 79.438121 | 1.79281E-06 | 0.003545528 |
| 1977.67996 | 67.673597 | 1.5273E-06  | 0.003020508 |
| 1977.71996 | 55.69865  | 1.25704E-06 | 0.002486075 |
| 1977.75996 | 52.354047 | 1.18156E-06 | 0.002336838 |
| 1977.79996 | 54.605437 | 1.23237E-06 | 0.002437379 |
| 1977.83996 | 48.007988 | 1.08347E-06 | 0.002142937 |
| 1977.87996 | 42.556286 | 9.60436E-07 | 0.001899627 |
| 1977.91996 | 47.155303 | 1.06423E-06 | 0.002104961 |
| 1977.95996 | 53.236595 | 1.20148E-06 | 0.002376471 |
| 1977.99996 | 61.203337 | 1.38127E-06 | 0.00273216  |
| 1978.03996 | 56.486418 | 1.27482E-06 | 0.002521644 |
| 1978.07996 | 53.924536 | 1.217E-06   | 0.002407327 |
| 1978.11996 | 54.684042 | 1.23414E-06 | 0.002441282 |
| 1978.15996 | 65.384673 | 1.47564E-06 | 0.002919054 |
| 1978.19996 | 66.16798  | 1.49332E-06 | 0.002954084 |
| 1978.23996 | 58.504887 | 1.32037E-06 | 0.002612016 |
| 1978.27996 | 60.610111 | 1.36789E-06 | 0.002706061 |
| 1978.31996 | 74.95249  | 1.69157E-06 | 0.003346473 |
| 1978.35996 | 78.850401 | 1.77954E-06 | 0.003520578 |
| 1978.39996 | 69.277134 | 1.56349E-06 | 0.003093205 |
| 1978.43996 | 55.413646 | 1.25061E-06 | 0.002474254 |
| 1978.47996 | 56.054903 | 1.26508E-06 | 0.002502938 |
| 1978.51996 | 55.363581 | 1.24948E-06 | 0.002472119 |
| 1978.55996 | 50.102429 | 1.13074E-06 | 0.002237241 |
| 1978.59996 | 52.618609 | 1.18753E-06 | 0.002349644 |
| 1978.63996 | 54.19967  | 1.22321E-06 | 0.002420294 |
| 1978.67996 | 53.818546 | 1.21461E-06 | 0.002403324 |
| 1978.71996 | 53.654459 | 1.21091E-06 | 0.002396045 |
| 1978.75996 | 50.189324 | 1.1327E-06  | 0.002241348 |
| 1978.79996 | 54.870258 | 1.23835E-06 | 0.002450438 |
| 1978.83996 | 64.684052 | 1.45983E-06 | 0.002888768 |
| 1978.87996 | 59.221561 | 1.33655E-06 | 0.002644868 |
| 1978.91996 | 62.23489  | 1.40455E-06 | 0.002779501 |
| 1978.95996 | 72.307636 | 1.63188E-06 | 0.00322943  |

|            |           |             |             |
|------------|-----------|-------------|-------------|
| 1978.99996 | 67.313453 | 1.51917E-06 | 0.003006439 |
| 1979.03996 | 56.098682 | 1.26607E-06 | 0.002505601 |
| 1979.07996 | 53.171282 | 1.2E-06     | 0.002374899 |
| 1979.11996 | 57.849771 | 1.30559E-06 | 0.002583917 |
| 1979.15996 | 63.770478 | 1.43921E-06 | 0.002848429 |
| 1979.19996 | 60.287638 | 1.36061E-06 | 0.002692915 |
| 1979.23996 | 52.603125 | 1.18718E-06 | 0.002349713 |
| 1979.27996 | 71.11457  | 1.60496E-06 | 0.003176659 |
| 1979.31996 | 88.321363 | 1.99329E-06 | 0.003945359 |
| 1979.35996 | 80.810879 | 1.82379E-06 | 0.003609935 |
| 1979.39996 | 55.631118 | 1.25552E-06 | 0.00248517  |
| 1979.43996 | 31.56208  | 7.12312E-07 | 0.001409979 |
| 1979.47996 | 31.503677 | 7.10994E-07 | 0.001407399 |
| 1979.51996 | 41.232579 | 9.30562E-07 | 0.001842066 |
| 1979.55996 | 49.051033 | 1.10701E-06 | 0.0021914   |
| 1979.59996 | 49.523325 | 1.11767E-06 | 0.002212544 |
| 1979.63996 | 47.281935 | 1.06709E-06 | 0.002112449 |
| 1979.67996 | 39.03386  | 8.8094E-07  | 0.001743979 |
| 1979.71996 | 36.811692 | 8.30789E-07 | 0.001644729 |
| 1979.75996 | 43.565517 | 9.83213E-07 | 0.001946526 |
| 1979.79996 | 58.552079 | 1.32144E-06 | 0.002616185 |
| 1979.83996 | 53.333216 | 1.20366E-06 | 0.002383047 |
| 1979.87996 | 48.900872 | 1.10362E-06 | 0.002185044 |
| 1979.91996 | 53.518535 | 1.20784E-06 | 0.002391424 |
| 1979.95996 | 54.346749 | 1.22653E-06 | 0.002428481 |
| 1979.99996 | 67.598478 | 1.5256E-06  | 0.003020695 |
| 1980.03996 | 74.399998 | 1.6791E-06  | 0.003324694 |
| 1980.07996 | 71.307198 | 1.6093E-06  | 0.003186551 |
| 1980.11996 | 52.102005 | 1.17587E-06 | 0.002328363 |
| 1980.15996 | 37.071457 | 8.36651E-07 | 0.001656703 |
| 1980.19996 | 35.108789 | 7.92356E-07 | 0.001569024 |
| 1980.23996 | 38.011565 | 8.57868E-07 | 0.001698785 |
| 1980.27996 | 42.582131 | 9.61019E-07 | 0.001903087 |
| 1980.31996 | 43.04711  | 9.71513E-07 | 0.001923907 |
| 1980.35996 | 44.754679 | 1.01005E-06 | 0.002000264 |
| 1980.39996 | 47.163504 | 1.06441E-06 | 0.002107967 |
| 1980.43996 | 39.013938 | 8.8049E-07  | 0.001743758 |
| 1980.47996 | 36.010178 | 8.127E-07   | 0.001609535 |
| 1980.51996 | 38.606263 | 8.7129E-07  | 0.001725606 |
| 1980.55996 | 44.025675 | 9.93598E-07 | 0.001967881 |
| 1980.59996 | 50.351924 | 1.13637E-06 | 0.0022507   |
| 1980.63996 | 42.72365  | 9.64213E-07 | 0.001909759 |
| 1980.67996 | 48.493397 | 1.09443E-06 | 0.002167712 |
| 1980.71996 | 58.190278 | 1.31327E-06 | 0.002601227 |
| 1980.75996 | 51.945282 | 1.17233E-06 | 0.00232211  |
| 1980.79996 | 47.536937 | 1.07284E-06 | 0.002125086 |

|            |           |             |             |
|------------|-----------|-------------|-------------|
| 1980.83996 | 50.970337 | 1.15033E-06 | 0.002278619 |
| 1980.87996 | 47.045664 | 1.06176E-06 | 0.002103209 |
| 1980.91996 | 48.253487 | 1.08901E-06 | 0.00215725  |
| 1980.95996 | 51.621421 | 1.16502E-06 | 0.002307865 |
| 1980.99996 | 52.232563 | 1.17882E-06 | 0.002335235 |
| 1981.03996 | 44.480899 | 1.00387E-06 | 0.00198871  |
| 1981.07996 | 43.847627 | 9.8958E-07  | 0.001960437 |
| 1981.11996 | 42.606493 | 9.61569E-07 | 0.001904984 |
| 1981.15996 | 48.791873 | 1.10116E-06 | 0.002181583 |
| 1981.19996 | 70.688536 | 1.59534E-06 | 0.003160691 |
| 1981.23996 | 81.424581 | 1.83764E-06 | 0.003640805 |
| 1981.27996 | 68.300911 | 1.54146E-06 | 0.003054057 |
| 1981.31996 | 59.230794 | 1.33676E-06 | 0.002648542 |
| 1981.35996 | 66.543931 | 1.5018E-06  | 0.002975614 |
| 1981.39996 | 64.410825 | 1.45366E-06 | 0.002880287 |
| 1981.43996 | 62.459278 | 1.40962E-06 | 0.002793075 |
| 1981.47996 | 64.144491 | 1.44765E-06 | 0.002868493 |
| 1981.51996 | 54.660718 | 1.23362E-06 | 0.002444435 |
| 1981.55996 | 50.656644 | 1.14325E-06 | 0.002265418 |
| 1981.59996 | 54.83612  | 1.23757E-06 | 0.002452378 |
| 1981.63996 | 48.53534  | 1.09538E-06 | 0.002170639 |
| 1981.67996 | 52.772421 | 1.191E-06   | 0.002360181 |
| 1981.71996 | 60.777418 | 1.37166E-06 | 0.002718249 |
| 1981.75996 | 60.761984 | 1.37131E-06 | 0.002717614 |
| 1981.79996 | 58.021573 | 1.30947E-06 | 0.0025951   |
| 1981.83996 | 56.190447 | 1.26814E-06 | 0.002513251 |
| 1981.87996 | 52.66718  | 1.18862E-06 | 0.002355712 |
| 1981.91996 | 45.826451 | 1.03424E-06 | 0.002049779 |
| 1981.95996 | 41.991923 | 9.47699E-07 | 0.001878302 |
| 1981.99996 | 50.003703 | 1.12851E-06 | 0.002236715 |
| 1982.03996 | 55.637898 | 1.25567E-06 | 0.002488788 |
| 1982.07996 | 51.061773 | 1.15239E-06 | 0.002284135 |
| 1982.11996 | 59.641758 | 1.34603E-06 | 0.002667996 |
| 1982.15996 | 57.125327 | 1.28924E-06 | 0.002555478 |
| 1982.19996 | 54.152932 | 1.22216E-06 | 0.002422558 |
| 1982.23996 | 62.833058 | 1.41805E-06 | 0.002810924 |
| 1982.27996 | 61.22266  | 1.38171E-06 | 0.002738936 |
| 1982.31996 | 42.575625 | 9.60873E-07 | 0.001904757 |
| 1982.35996 | 40.745553 | 9.1957E-07  | 0.001822919 |
| 1982.39996 | 50.437491 | 1.1383E-06  | 0.002256574 |
| 1982.43996 | 49.091603 | 1.10793E-06 | 0.002196403 |
| 1982.47996 | 60.367358 | 1.36241E-06 | 0.002700945 |
| 1982.51996 | 81.625682 | 1.84218E-06 | 0.003652155 |
| 1982.55996 | 85.402933 | 1.92743E-06 | 0.003821236 |
| 1982.59996 | 71.752529 | 1.61935E-06 | 0.003210532 |
| 1982.63996 | 53.422119 | 1.20566E-06 | 0.002390395 |

|            |            |             |             |
|------------|------------|-------------|-------------|
| 1982.67996 | 42.147713  | 9.51215E-07 | 0.001885955 |
| 1982.71996 | 38.513327  | 8.69192E-07 | 0.001723365 |
| 1982.75996 | 47.165032  | 1.06445E-06 | 0.002110547 |
| 1982.79996 | 56.09736   | 1.26604E-06 | 0.002510303 |
| 1982.83996 | 58.525959  | 1.32085E-06 | 0.002619033 |
| 1982.87996 | 46.895367  | 1.05836E-06 | 0.002098607 |
| 1982.91996 | 36.708433  | 8.28458E-07 | 0.001642766 |
| 1982.95996 | 38.57718   | 8.70633E-07 | 0.001726431 |
| 1982.99996 | 42.948054  | 9.69278E-07 | 0.001922078 |
| 1983.03996 | 44.719952  | 1.00927E-06 | 0.002001417 |
| 1983.07996 | 46.133565  | 1.04117E-06 | 0.002064724 |
| 1983.11996 | 47.141413  | 1.06392E-06 | 0.002109873 |
| 1983.15996 | 55.85632   | 1.2606E-06  | 0.00249997  |
| 1983.19996 | 58.638123  | 1.32338E-06 | 0.002624529 |
| 1983.23996 | 64.679286  | 1.45972E-06 | 0.002894978 |
| 1983.27996 | 63.593357  | 1.43521E-06 | 0.00284643  |
| 1983.31996 | 54.953936  | 1.24023E-06 | 0.00245978  |
| 1983.35996 | 61.191804  | 1.38101E-06 | 0.002739047 |
| 1983.39996 | 59.355511  | 1.33957E-06 | 0.002656905 |
| 1983.43996 | 48.588203  | 1.09657E-06 | 0.002174977 |
| 1983.47996 | 54.448052  | 1.22882E-06 | 0.002437333 |
| 1983.51996 | 66.717055  | 1.50571E-06 | 0.002986608 |
| 1983.55996 | 72.634133  | 1.63925E-06 | 0.003251553 |
| 1983.59996 | 61.141108  | 1.37987E-06 | 0.002737109 |
| 1983.63996 | 45.321407  | 1.02284E-06 | 0.002028948 |
| 1983.67996 | 42.786889  | 9.6564E-07  | 0.001915522 |
| 1983.71996 | 48.126657  | 1.08615E-06 | 0.002154621 |
| 1983.75996 | 57.101758  | 1.28871E-06 | 0.002556486 |
| 1983.79996 | 69.780962  | 1.57486E-06 | 0.003124205 |
| 1983.83996 | 63.058205  | 1.42314E-06 | 0.002823274 |
| 1983.87996 | 47.447037  | 1.07081E-06 | 0.002124366 |
| 1983.91996 | 45.984619  | 1.03781E-06 | 0.00205893  |
| 1983.95996 | 54.29573   | 1.22538E-06 | 0.002431103 |
| 1983.99996 | 49.535929  | 1.11796E-06 | 0.002218026 |
| 1984.03996 | 53.951506  | 1.21761E-06 | 0.002415788 |
| 1984.07996 | 59.737878  | 1.3482E-06  | 0.002674938 |
| 1984.11996 | 60.769085  | 1.37147E-06 | 0.002721168 |
| 1984.15996 | 53.974483  | 1.21813E-06 | 0.002416963 |
| 1984.19996 | 46.186452  | 1.04236E-06 | 0.002068258 |
| 1984.23996 | 48.063139  | 1.08472E-06 | 0.002152341 |
| 1984.27996 | 61.810833  | 1.39498E-06 | 0.00276804  |
| 1984.31996 | 58.678962  | 1.3243E-06  | 0.00262784  |
| 1984.35996 | 47.771207  | 1.07813E-06 | 0.002139397 |
| 1984.39996 | 48.465559  | 1.0938E-06  | 0.002170537 |
| 1984.43996 | 74.972144  | 1.69202E-06 | 0.003357706 |
| 1984.47996 | 106.067347 | 2.39379E-06 | 0.004750433 |

|            |           |             |             |
|------------|-----------|-------------|-------------|
| 1984.51996 | 94.711344 | 2.1375E-06  | 0.004241918 |
| 1984.55996 | 60.078879 | 1.3559E-06  | 0.002690858 |
| 1984.59996 | 45.170036 | 1.01942E-06 | 0.00202315  |
| 1984.63996 | 42.843917 | 9.66928E-07 | 0.001919003 |
| 1984.67996 | 44.584113 | 1.0062E-06  | 0.001996988 |
| 1984.71996 | 43.343924 | 9.78212E-07 | 0.001941477 |
| 1984.75996 | 37.920347 | 8.55809E-07 | 0.001698576 |
| 1984.79996 | 39.170445 | 8.84022E-07 | 0.001754608 |
| 1984.83996 | 51.875102 | 1.17075E-06 | 0.002323749 |
| 1984.87996 | 62.152501 | 1.4027E-06  | 0.002784182 |
| 1984.91996 | 56.247604 | 1.26943E-06 | 0.002519717 |
| 1984.95996 | 61.936119 | 1.39781E-06 | 0.002774601 |
| 1984.99996 | 56.792149 | 1.28172E-06 | 0.002544214 |
| 1985.03996 | 49.290598 | 1.11242E-06 | 0.002208198 |
| 1985.07996 | 54.099626 | 1.22095E-06 | 0.00242369  |
| 1985.11996 | 52.729964 | 1.19004E-06 | 0.002362376 |
| 1985.15996 | 53.787901 | 1.21392E-06 | 0.002409821 |
| 1985.19996 | 49.418666 | 1.11531E-06 | 0.002214114 |
| 1985.23996 | 54.929082 | 1.23967E-06 | 0.002461048 |
| 1985.27996 | 80.888329 | 1.82554E-06 | 0.003624202 |
| 1985.31996 | 86.491074 | 1.95198E-06 | 0.003875311 |
| 1985.35996 | 68.507955 | 1.54613E-06 | 0.003069623 |
| 1985.39996 | 59.326728 | 1.33892E-06 | 0.002658295 |
| 1985.43996 | 51.173366 | 1.15491E-06 | 0.002293008 |
| 1985.47996 | 67.747193 | 1.52896E-06 | 0.003035719 |
| 1985.51996 | 67.053166 | 1.5133E-06  | 0.003004681 |
| 1985.55996 | 55.23124  | 1.24649E-06 | 0.002474985 |
| 1985.59996 | 51.680231 | 1.16635E-06 | 0.002315906 |
| 1985.63996 | 54.339856 | 1.22637E-06 | 0.002435139 |
| 1985.67996 | 57.61203  | 1.30022E-06 | 0.002581827 |
| 1985.71996 | 57.415127 | 1.29578E-06 | 0.002573055 |
| 1985.75996 | 56.165776 | 1.26758E-06 | 0.002517116 |
| 1985.79996 | 54.852705 | 1.23795E-06 | 0.002458319 |
| 1985.83996 | 44.698177 | 1.00878E-06 | 0.002003267 |
| 1985.87996 | 34.809355 | 7.85599E-07 | 0.001560105 |
| 1985.91996 | 29.870433 | 6.74134E-07 | 0.001338776 |
| 1985.95996 | 36.738514 | 8.29137E-07 | 0.001646633 |
| 1985.99996 | 52.971522 | 1.19549E-06 | 0.00237425  |
| 1986.03996 | 60.85679  | 1.37345E-06 | 0.002727733 |
| 1986.07996 | 67.903126 | 1.53248E-06 | 0.003043626 |
| 1986.11996 | 73.848165 | 1.66665E-06 | 0.003310167 |
| 1986.15996 | 75.100192 | 1.69491E-06 | 0.003366356 |
| 1986.19996 | 65.248673 | 1.47257E-06 | 0.002924822 |
| 1986.23996 | 58.529762 | 1.32094E-06 | 0.002623694 |
| 1986.27996 | 57.543247 | 1.29867E-06 | 0.002579524 |
| 1986.31996 | 66.452347 | 1.49974E-06 | 0.002978957 |

|            |           |             |             |
|------------|-----------|-------------|-------------|
| 1986.35996 | 87.469791 | 1.97407E-06 | 0.003921216 |
| 1986.39996 | 84.73383  | 1.91232E-06 | 0.003798641 |
| 1986.43996 | 66.8957   | 1.50974E-06 | 0.002999013 |
| 1986.47996 | 58.392978 | 1.31785E-06 | 0.002617879 |
| 1986.51996 | 58.232841 | 1.31423E-06 | 0.002610752 |
| 1986.55996 | 57.662464 | 1.30136E-06 | 0.002585233 |
| 1986.59996 | 53.437554 | 1.20601E-06 | 0.002395862 |
| 1986.63996 | 59.43097  | 1.34127E-06 | 0.002664629 |
| 1986.67996 | 54.988788 | 1.24102E-06 | 0.00246551  |
| 1986.71996 | 59.084254 | 1.33345E-06 | 0.00264919  |
| 1986.75996 | 61.046453 | 1.37773E-06 | 0.002737226 |
| 1986.79996 | 54.981561 | 1.24086E-06 | 0.002465335 |
| 1986.83996 | 56.983954 | 1.28605E-06 | 0.002555172 |
| 1986.87996 | 73.564367 | 1.66025E-06 | 0.003298708 |
| 1986.91996 | 79.834748 | 1.80176E-06 | 0.003579951 |
| 1986.95996 | 70.023247 | 1.58033E-06 | 0.003140047 |
| 1986.99996 | 63.266426 | 1.42784E-06 | 0.002837108 |
| 1987.03996 | 63.894371 | 1.44201E-06 | 0.002865325 |
| 1987.07996 | 57.674765 | 1.30164E-06 | 0.002586461 |
| 1987.11996 | 50.2548   | 1.13418E-06 | 0.002253753 |
| 1987.15996 | 49.082654 | 1.10773E-06 | 0.002201231 |
| 1987.19996 | 52.104023 | 1.17592E-06 | 0.002336779 |
| 1987.23996 | 59.119139 | 1.33424E-06 | 0.002651448 |
| 1987.27996 | 63.134969 | 1.42487E-06 | 0.002831612 |
| 1987.31996 | 64.630302 | 1.45862E-06 | 0.002898736 |
| 1987.35996 | 64.112161 | 1.44692E-06 | 0.002875555 |
| 1987.39996 | 60.689174 | 1.36967E-06 | 0.002722082 |
| 1987.43996 | 55.645441 | 1.25584E-06 | 0.002495907 |
| 1987.47996 | 53.536177 | 1.20824E-06 | 0.002401347 |
| 1987.51996 | 54.123925 | 1.2215E-06  | 0.002427759 |
| 1987.55996 | 52.475414 | 1.1843E-06  | 0.002353861 |
| 1987.59996 | 44.417684 | 1.00245E-06 | 0.00199246  |
| 1987.63996 | 40.711115 | 9.18793E-07 | 0.00182623  |
| 1987.67996 | 40.094433 | 9.04876E-07 | 0.001798603 |
| 1987.71996 | 48.30602  | 1.0902E-06  | 0.002167011 |
| 1987.75996 | 50.770257 | 1.14581E-06 | 0.002277603 |
| 1987.79996 | 46.197756 | 1.04262E-06 | 0.002072518 |
| 1987.83996 | 37.42069  | 8.44533E-07 | 0.001678796 |
| 1987.87996 | 36.665019 | 8.27478E-07 | 0.001644928 |
| 1987.91996 | 51.648156 | 1.16563E-06 | 0.002317173 |
| 1987.95996 | 58.662615 | 1.32393E-06 | 0.002631927 |
| 1987.99996 | 61.58411  | 1.38987E-06 | 0.002763057 |
| 1988.03996 | 58.345864 | 1.31678E-06 | 0.002617821 |
| 1988.07996 | 58.449547 | 1.31912E-06 | 0.002622526 |
| 1988.11996 | 61.852356 | 1.39592E-06 | 0.002775259 |
| 1988.15996 | 66.149863 | 1.49291E-06 | 0.002968144 |



|            |           |             |             |
|------------|-----------|-------------|-------------|
| 1988.19996 | 68.169146 | 1.53848E-06 | 0.003058811 |
| 1988.23996 | 62.869109 | 1.41887E-06 | 0.00282105  |
| 1988.27996 | 56.423535 | 1.2734E-06  | 0.002531877 |
| 1988.31996 | 49.689484 | 1.12142E-06 | 0.002229747 |
| 1988.35996 | 48.582679 | 1.09644E-06 | 0.002180124 |
| 1988.39996 | 48.687217 | 1.0988E-06  | 0.002184859 |
| 1988.43996 | 53.683972 | 1.21157E-06 | 0.002409139 |
| 1988.47996 | 58.818921 | 1.32746E-06 | 0.00263963  |
| 1988.51996 | 49.714285 | 1.12198E-06 | 0.002231084 |
| 1988.55996 | 39.827752 | 8.98857E-07 | 0.001787431 |
| 1988.59996 | 40.434194 | 9.12543E-07 | 0.001814684 |
| 1988.63996 | 52.500246 | 1.18486E-06 | 0.002356255 |
| 1988.67996 | 66.056071 | 1.49079E-06 | 0.002964711 |
| 1988.71996 | 66.823862 | 1.50812E-06 | 0.002999231 |
| 1988.75996 | 60.545709 | 1.36643E-06 | 0.002717506 |
| 1988.79996 | 60.351172 | 1.36204E-06 | 0.002708829 |
| 1988.83996 | 64.045765 | 1.44542E-06 | 0.002874716 |
| 1988.87996 | 66.562675 | 1.50223E-06 | 0.002987749 |
| 1988.91996 | 67.204867 | 1.51672E-06 | 0.003016635 |
| 1988.95996 | 59.908916 | 1.35206E-06 | 0.002689195 |
| 1988.99996 | 48.885289 | 1.10327E-06 | 0.00219441  |
| 1989.03996 | 51.310088 | 1.158E-06   | 0.002303303 |
| 1989.07996 | 61.891167 | 1.3968E-06  | 0.002778342 |
| 1989.11996 | 56.287691 | 1.27033E-06 | 0.002526848 |
| 1989.15996 | 45.056935 | 1.01687E-06 | 0.002022722 |
| 1989.19996 | 43.484012 | 9.81374E-07 | 0.001952148 |
| 1989.23996 | 48.974755 | 1.10529E-06 | 0.002198691 |
| 1989.27996 | 41.30052  | 9.32095E-07 | 0.001854198 |
| 1989.31996 | 41.196834 | 9.29755E-07 | 0.00184958  |
| 1989.35996 | 52.971735 | 1.1955E-06  | 0.002378276 |
| 1989.39996 | 58.918346 | 1.32971E-06 | 0.002645315 |
| 1989.43996 | 57.87649  | 1.30619E-06 | 0.00259859  |
| 1989.47996 | 49.287173 | 1.11234E-06 | 0.002212984 |
| 1989.51996 | 41.645922 | 9.3989E-07  | 0.001869931 |
| 1989.55996 | 51.846891 | 1.17011E-06 | 0.002328008 |
| 1989.59996 | 61.66184  | 1.39162E-06 | 0.002768771 |
| 1989.63996 | 70.629622 | 1.59401E-06 | 0.00317151  |
| 1989.67996 | 72.793739 | 1.64285E-06 | 0.003268752 |
| 1989.71996 | 65.783763 | 1.48465E-06 | 0.002954034 |
| 1989.75996 | 59.158529 | 1.33513E-06 | 0.002656579 |
| 1989.79996 | 52.837302 | 1.19246E-06 | 0.002372765 |
| 1989.83996 | 47.862036 | 1.08018E-06 | 0.002149384 |
| 1989.87996 | 50.295517 | 1.1351E-06  | 0.002258712 |
| 1989.91996 | 52.369896 | 1.18192E-06 | 0.002351917 |
| 1989.95996 | 63.275787 | 1.42805E-06 | 0.002841755 |
| 1989.99996 | 71.650279 | 1.61705E-06 | 0.003217923 |

|            |           |             |             |
|------------|-----------|-------------|-------------|
| 1990.03996 | 68.172527 | 1.53856E-06 | 0.003061794 |
| 1990.07996 | 62.841688 | 1.41825E-06 | 0.00282243  |
| 1990.11996 | 56.021402 | 1.26433E-06 | 0.002516158 |
| 1990.15996 | 50.60017  | 1.14198E-06 | 0.002272714 |
| 1990.19996 | 51.614761 | 1.16487E-06 | 0.002318331 |
| 1990.23996 | 47.93277  | 1.08178E-06 | 0.002152994 |
| 1990.27996 | 44.87533  | 1.01277E-06 | 0.002015703 |
| 1990.31996 | 57.082574 | 1.28827E-06 | 0.002564078 |
| 1990.35996 | 59.887854 | 1.35159E-06 | 0.002690142 |
| 1990.39996 | 60.200867 | 1.35865E-06 | 0.002704256 |
| 1990.43996 | 74.061435 | 1.67146E-06 | 0.003326948 |
| 1990.47996 | 68.310136 | 1.54166E-06 | 0.003068653 |
| 1990.51996 | 50.821537 | 1.14697E-06 | 0.002283069 |
| 1990.55996 | 45.687614 | 1.03111E-06 | 0.002052478 |
| 1990.59996 | 46.969144 | 1.06003E-06 | 0.002110092 |
| 1990.63996 | 46.950896 | 1.05962E-06 | 0.002109315 |
| 1990.67996 | 45.264987 | 1.02157E-06 | 0.002033614 |
| 1990.71996 | 50.133347 | 1.13144E-06 | 0.00225238  |
| 1990.75996 | 66.368077 | 1.49784E-06 | 0.00298183  |
| 1990.79996 | 80.676961 | 1.82077E-06 | 0.003624782 |
| 1990.83996 | 78.146961 | 1.76367E-06 | 0.003511181 |
| 1990.87996 | 66.765934 | 1.50681E-06 | 0.002999886 |
| 1990.91996 | 63.07218  | 1.42345E-06 | 0.002833978 |
| 1990.95996 | 58.80432  | 1.32713E-06 | 0.002642266 |
| 1990.99996 | 53.512027 | 1.20769E-06 | 0.002404515 |
| 1991.03996 | 66.374977 | 1.49799E-06 | 0.002982559 |
| 1991.07996 | 72.854769 | 1.64423E-06 | 0.003273795 |
| 1991.11996 | 77.668488 | 1.75287E-06 | 0.003490174 |
| 1991.15996 | 75.087937 | 1.69463E-06 | 0.00337428  |
| 1991.19996 | 57.980669 | 1.30854E-06 | 0.002605571 |
| 1991.23996 | 41.77374  | 9.42775E-07 | 0.001877292 |
| 1991.27996 | 49.148923 | 1.10922E-06 | 0.002208773 |
| 1991.31996 | 60.229498 | 1.3593E-06  | 0.002706793 |
| 1991.35996 | 63.467632 | 1.43238E-06 | 0.002852376 |
| 1991.39996 | 71.27539  | 1.60859E-06 | 0.003203339 |
| 1991.43996 | 64.519724 | 1.45612E-06 | 0.002899776 |
| 1991.47996 | 46.859944 | 1.05756E-06 | 0.002106117 |
| 1991.51996 | 44.196492 | 9.97453E-07 | 0.001986448 |
| 1991.55996 | 50.917404 | 1.14913E-06 | 0.002288571 |
| 1991.59996 | 51.606411 | 1.16468E-06 | 0.002319586 |
| 1991.63996 | 52.266912 | 1.17959E-06 | 0.002349321 |
| 1991.67996 | 56.675708 | 1.27909E-06 | 0.002547541 |
| 1991.71996 | 64.866947 | 1.46396E-06 | 0.002915792 |
| 1991.75996 | 57.678076 | 1.30171E-06 | 0.002592701 |
| 1991.79996 | 51.648589 | 1.16564E-06 | 0.002321715 |
| 1991.83996 | 55.785316 | 1.259E-06   | 0.00250772  |

|            |           |             |             |
|------------|-----------|-------------|-------------|
| 1991.87996 | 59.222476 | 1.33657E-06 | 0.002662285 |
| 1991.91996 | 46.286241 | 1.04462E-06 | 0.002080791 |
| 1991.95996 | 38.261615 | 8.63511E-07 | 0.00172008  |
| 1991.99996 | 53.674541 | 1.21136E-06 | 0.002413028 |
| 1992.03996 | 68.061493 | 1.53605E-06 | 0.003059879 |
| 1992.07996 | 62.092383 | 1.40134E-06 | 0.002791579 |
| 1992.11996 | 57.240033 | 1.29183E-06 | 0.002573476 |
| 1992.15996 | 49.537216 | 1.11799E-06 | 0.002227207 |
| 1992.19996 | 50.055903 | 1.12969E-06 | 0.002250572 |
| 1992.23996 | 57.880926 | 1.30629E-06 | 0.002602447 |
| 1992.27996 | 57.867964 | 1.306E-06   | 0.002601916 |
| 1992.31996 | 52.390931 | 1.18239E-06 | 0.0023557   |
| 1992.35996 | 49.456096 | 1.11616E-06 | 0.002223783 |
| 1992.39996 | 61.527516 | 1.38859E-06 | 0.002766627 |
| 1992.43996 | 55.352541 | 1.24923E-06 | 0.002489015 |
| 1992.47996 | 47.475147 | 1.07145E-06 | 0.002134839 |
| 1992.51996 | 41.426507 | 9.34939E-07 | 0.001862884 |
| 1992.55996 | 39.06395  | 8.81619E-07 | 0.001756679 |
| 1992.59996 | 41.065642 | 9.26794E-07 | 0.00184673  |
| 1992.63996 | 44.220699 | 9.98E-07    | 0.001988654 |
| 1992.67996 | 47.906522 | 1.08118E-06 | 0.002154453 |
| 1992.71996 | 44.623917 | 1.0071E-06  | 0.002006868 |
| 1992.75996 | 53.132698 | 1.19913E-06 | 0.00238958  |
| 1992.79996 | 57.523289 | 1.29822E-06 | 0.002587094 |
| 1992.83996 | 52.696498 | 1.18929E-06 | 0.002370058 |
| 1992.87996 | 55.029106 | 1.24193E-06 | 0.002475018 |
| 1992.91996 | 56.575525 | 1.27683E-06 | 0.002544622 |
| 1992.95996 | 53.856234 | 1.21546E-06 | 0.002422363 |
| 1992.99996 | 59.673432 | 1.34675E-06 | 0.002684065 |
| 1993.03996 | 60.12994  | 1.35705E-06 | 0.002704653 |
| 1993.07996 | 58.095088 | 1.31113E-06 | 0.002613177 |
| 1993.11996 | 61.216813 | 1.38158E-06 | 0.002753651 |
| 1993.15996 | 62.061585 | 1.40064E-06 | 0.002791707 |
| 1993.19996 | 54.195488 | 1.22312E-06 | 0.002437916 |
| 1993.23996 | 44.769854 | 1.01039E-06 | 0.002013956 |
| 1993.27996 | 43.903606 | 9.90843E-07 | 0.001975028 |
| 1993.31996 | 67.002011 | 1.51214E-06 | 0.003014183 |
| 1993.35996 | 79.107273 | 1.78534E-06 | 0.003558827 |
| 1993.39996 | 66.690777 | 1.50512E-06 | 0.003000302 |
| 1993.43996 | 47.432013 | 1.07047E-06 | 0.002133927 |
| 1993.47996 | 37.71227  | 8.51113E-07 | 0.001696678 |
| 1993.51996 | 44.1657   | 9.96758E-07 | 0.001987058 |
| 1993.55996 | 49.140757 | 1.10904E-06 | 0.002210935 |
| 1993.59996 | 48.553619 | 1.09579E-06 | 0.002184562 |
| 1993.63996 | 44.062481 | 9.94429E-07 | 0.001982533 |
| 1993.67996 | 45.656198 | 1.0304E-06  | 0.002054281 |

|            |           |             |             |
|------------|-----------|-------------|-------------|
| 1993.71996 | 63.131623 | 1.42479E-06 | 0.002840638 |
| 1993.75996 | 72.942385 | 1.64621E-06 | 0.003282144 |
| 1993.79996 | 65.895688 | 1.48717E-06 | 0.002965127 |
| 1993.83996 | 57.081299 | 1.28825E-06 | 0.002568555 |
| 1993.87996 | 57.972789 | 1.30837E-06 | 0.002608723 |
| 1993.91996 | 62.318541 | 1.40644E-06 | 0.002804334 |
| 1993.95996 | 64.988408 | 1.4667E-06  | 0.002924537 |
| 1993.99996 | 60.801789 | 1.37221E-06 | 0.00273619  |
| 1994.03996 | 49.147247 | 1.10918E-06 | 0.002211759 |
| 1994.07996 | 50.098306 | 1.13065E-06 | 0.002254604 |
| 1994.11996 | 58.562436 | 1.32167E-06 | 0.002635574 |
| 1994.15996 | 48.630328 | 1.09752E-06 | 0.002188628 |
| 1994.19996 | 46.783469 | 1.05584E-06 | 0.002105552 |
| 1994.23996 | 58.104905 | 1.31135E-06 | 0.00261514  |
| 1994.27996 | 63.967385 | 1.44365E-06 | 0.002879052 |
| 1994.31996 | 52.11138  | 1.17608E-06 | 0.002345482 |
| 1994.35996 | 49.811106 | 1.12417E-06 | 0.002241994 |
| 1994.39996 | 63.521448 | 1.43359E-06 | 0.002859153 |
| 1994.43996 | 72.010653 | 1.62518E-06 | 0.003241324 |
| 1994.47996 | 58.385714 | 1.31768E-06 | 0.002628095 |
| 1994.51996 | 45.607818 | 1.0293E-06  | 0.002052969 |
| 1994.55996 | 43.145436 | 9.73732E-07 | 0.001942168 |
| 1994.59996 | 49.111804 | 1.10839E-06 | 0.002210785 |
| 1994.63996 | 60.799109 | 1.37215E-06 | 0.002736948 |
| 1994.67996 | 70.951952 | 1.60129E-06 | 0.003194055 |
| 1994.71996 | 56.61532  | 1.27773E-06 | 0.002548711 |
| 1994.75996 | 42.769357 | 9.65245E-07 | 0.001925432 |
| 1994.79996 | 47.274184 | 1.06691E-06 | 0.002128277 |
| 1994.83996 | 58.238767 | 1.31437E-06 | 0.002621954 |
| 1994.87996 | 53.908351 | 1.21664E-06 | 0.002427044 |
| 1994.91996 | 46.866879 | 1.05772E-06 | 0.002110067 |
| 1994.95996 | 44.38388  | 1.00168E-06 | 0.001998316 |
| 1994.99996 | 48.29369  | 1.08992E-06 | 0.002174393 |
| 1995.03996 | 57.002831 | 1.28647E-06 | 0.002566568 |
| 1995.07996 | 60.236001 | 1.35944E-06 | 0.002712197 |
| 1995.11996 | 50.085759 | 1.13037E-06 | 0.002255215 |
| 1995.15996 | 42.4681   | 9.58446E-07 | 0.001912253 |
| 1995.19996 | 54.607947 | 1.23243E-06 | 0.002458935 |
| 1995.23996 | 67.217584 | 1.51701E-06 | 0.003026793 |
| 1995.27996 | 73.521952 | 1.65929E-06 | 0.003310744 |
| 1995.31996 | 73.906186 | 1.66796E-06 | 0.003328113 |
| 1995.35996 | 56.897583 | 1.2841E-06  | 0.00256224  |
| 1995.39996 | 55.622853 | 1.25533E-06 | 0.002504886 |
| 1995.43996 | 56.586975 | 1.27709E-06 | 0.002548355 |
| 1995.47996 | 47.495771 | 1.07191E-06 | 0.002138982 |
| 1995.51996 | 50.278396 | 1.13471E-06 | 0.002264343 |

|            |           |             |             |
|------------|-----------|-------------|-------------|
| 1995.55996 | 67.259279 | 1.51795E-06 | 0.003029157 |
| 1995.59996 | 66.183162 | 1.49366E-06 | 0.002980751 |
| 1995.63996 | 51.676979 | 1.16628E-06 | 0.00232747  |
| 1995.67996 | 52.115188 | 1.17617E-06 | 0.002347253 |
| 1995.71996 | 58.405732 | 1.31814E-06 | 0.00263063  |
| 1995.75996 | 62.862035 | 1.41871E-06 | 0.002831402 |
| 1995.79996 | 71.552922 | 1.61485E-06 | 0.003222917 |
| 1995.83996 | 63.73244  | 1.43835E-06 | 0.002870721 |
| 1995.87996 | 45.215455 | 1.02045E-06 | 0.002036695 |
| 1995.91996 | 46.752905 | 1.05515E-06 | 0.002105991 |
| 1995.95996 | 56.940446 | 1.28507E-06 | 0.002564941 |
| 1995.99996 | 57.252031 | 1.2921E-06  | 0.002579029 |
| 1996.03996 | 62.139521 | 1.4024E-06  | 0.002799251 |
| 1996.07996 | 66.032058 | 1.49025E-06 | 0.002974661 |
| 1996.11996 | 59.104167 | 1.3339E-06  | 0.002662622 |
| 1996.15996 | 59.100102 | 1.33381E-06 | 0.002662492 |
| 1996.19996 | 62.154541 | 1.40274E-06 | 0.002800152 |
| 1996.23996 | 64.425208 | 1.45399E-06 | 0.002902507 |
| 1996.27996 | 62.856158 | 1.41858E-06 | 0.002831875 |
| 1996.31996 | 56.545967 | 1.27616E-06 | 0.002547631 |
| 1996.35996 | 58.881976 | 1.32888E-06 | 0.002652931 |
| 1996.39996 | 68.381283 | 1.54327E-06 | 0.003080985 |
| 1996.43996 | 66.337579 | 1.49715E-06 | 0.002988964 |
| 1996.47996 | 53.983051 | 1.21832E-06 | 0.002432356 |
| 1996.51996 | 42.714941 | 9.64017E-07 | 0.001924679 |
| 1996.55996 | 33.369925 | 7.53113E-07 | 0.001503635 |
| 1996.59996 | 32.358115 | 7.30278E-07 | 0.001458072 |
| 1996.63996 | 32.977167 | 7.44249E-07 | 0.001485997 |
| 1996.67996 | 31.89924  | 7.19921E-07 | 0.001437453 |
| 1996.71996 | 36.376076 | 8.20957E-07 | 0.001639222 |
| 1996.75996 | 36.951445 | 8.33943E-07 | 0.001665183 |
| 1996.79996 | 41.812854 | 9.43658E-07 | 0.001884296 |
| 1996.83996 | 45.039155 | 1.01647E-06 | 0.00202973  |
| 1996.87996 | 37.474472 | 8.45747E-07 | 0.001688855 |
| 1996.91996 | 31.937261 | 7.20779E-07 | 0.001439339 |
| 1996.95996 | 39.479567 | 8.90999E-07 | 0.001779289 |
| 1996.99996 | 46.54876  | 1.05054E-06 | 0.00209793  |
| 1997.03996 | 48.795276 | 1.10124E-06 | 0.002199223 |
| 1997.07996 | 42.437934 | 9.57765E-07 | 0.001912733 |
| 1997.11996 | 39.555491 | 8.92712E-07 | 0.001782854 |
| 1997.15996 | 52.316777 | 1.18072E-06 | 0.00235808  |
| 1997.19996 | 66.045107 | 1.49055E-06 | 0.002976919 |
| 1997.23996 | 61.225942 | 1.38178E-06 | 0.002759755 |
| 1997.27996 | 73.012475 | 1.64779E-06 | 0.003291098 |
| 1997.31996 | 71.495158 | 1.61355E-06 | 0.003222768 |
| 1997.35996 | 51.584769 | 1.1642E-06  | 0.002325319 |

|            |           |             |             |
|------------|-----------|-------------|-------------|
| 1997.39996 | 53.248197 | 1.20174E-06 | 0.002400351 |
| 1997.43996 | 52.299933 | 1.18034E-06 | 0.002357652 |
| 1997.47996 | 40.781919 | 9.20391E-07 | 0.001838463 |
| 1997.51996 | 37.188857 | 8.39301E-07 | 0.00167652  |
| 1997.55996 | 43.108001 | 9.72888E-07 | 0.001943401 |
| 1997.59996 | 62.595911 | 1.4127E-06  | 0.002822015 |
| 1997.63996 | 56.381577 | 1.27245E-06 | 0.002541904 |
| 1997.67996 | 47.136474 | 1.0638E-06  | 0.002125141 |
| 1997.71996 | 46.391769 | 1.047E-06   | 0.002091608 |
| 1997.75996 | 50.323486 | 1.13573E-06 | 0.002268918 |
| 1997.79996 | 56.789225 | 1.28165E-06 | 0.002560488 |
| 1997.83996 | 52.83883  | 1.1925E-06  | 0.002382422 |
| 1997.87996 | 54.200437 | 1.22323E-06 | 0.002443863 |
| 1997.91996 | 52.74756  | 1.19044E-06 | 0.002378402 |
| 1997.95996 | 58.854263 | 1.32826E-06 | 0.002653808 |
| 1997.99996 | 59.348312 | 1.33941E-06 | 0.002676139 |
| 1998.03996 | 55.378885 | 1.24982E-06 | 0.002497199 |
| 1998.07996 | 52.251529 | 1.17924E-06 | 0.002356224 |
| 1998.11996 | 55.883375 | 1.26121E-06 | 0.002520049 |
| 1998.15996 | 58.480919 | 1.31983E-06 | 0.002637237 |
| 1998.19996 | 57.536428 | 1.29852E-06 | 0.002594697 |
| 1998.23996 | 56.184216 | 1.268E-06   | 0.002533767 |
| 1998.27996 | 57.712405 | 1.30249E-06 | 0.002602737 |
| 1998.31996 | 67.963123 | 1.53383E-06 | 0.003065089 |
| 1998.35996 | 81.397031 | 1.83702E-06 | 0.003671022 |
| 1998.39996 | 73.223269 | 1.65255E-06 | 0.00330245  |
| 1998.43996 | 71.927154 | 1.6233E-06  | 0.003244059 |
| 1998.47996 | 59.904484 | 1.35196E-06 | 0.002701866 |
| 1998.51996 | 50.138272 | 1.13155E-06 | 0.002261427 |
| 1998.55996 | 61.937967 | 1.39785E-06 | 0.002793694 |
| 1998.59996 | 63.709494 | 1.43783E-06 | 0.002873656 |
| 1998.63996 | 61.611927 | 1.3905E-06  | 0.0027791   |
| 1998.67996 | 53.713178 | 1.21223E-06 | 0.002422863 |
| 1998.71996 | 51.658676 | 1.16586E-06 | 0.002330236 |
| 1998.75996 | 56.870023 | 1.28348E-06 | 0.002565363 |
| 1998.79996 | 50.127539 | 1.13131E-06 | 0.00226126  |
| 1998.83996 | 43.646784 | 9.85047E-07 | 0.001968952 |
| 1998.87996 | 55.276282 | 1.24751E-06 | 0.00249362  |
| 1998.91996 | 67.76493  | 1.52936E-06 | 0.003057068 |
| 1998.95996 | 65.432466 | 1.47672E-06 | 0.002951903 |
| 1998.99996 | 52.709358 | 1.18958E-06 | 0.002377964 |
| 1999.03996 | 44.703781 | 1.0089E-06  | 0.002016836 |
| 1999.07996 | 51.598627 | 1.16451E-06 | 0.002327947 |
| 1999.11996 | 61.799939 | 1.39474E-06 | 0.00278825  |
| 1999.15996 | 61.428496 | 1.38636E-06 | 0.002771547 |
| 1999.19996 | 51.009518 | 1.15121E-06 | 0.002301507 |

|            |           |             |             |
|------------|-----------|-------------|-------------|
| 1999.23996 | 49.762679 | 1.12307E-06 | 0.002245295 |
| 1999.27996 | 52.096298 | 1.17574E-06 | 0.002350635 |
| 1999.31996 | 54.664944 | 1.23371E-06 | 0.002466584 |
| 1999.35996 | 63.753819 | 1.43883E-06 | 0.002876749 |
| 1999.39996 | 59.543457 | 1.34381E-06 | 0.002686819 |
| 1999.43996 | 56.809719 | 1.28212E-06 | 0.002563514 |
| 1999.47996 | 61.908034 | 1.39718E-06 | 0.00279363  |
| 1999.51996 | 63.302666 | 1.42865E-06 | 0.00285662  |
| 1999.55996 | 60.820922 | 1.37264E-06 | 0.002744683 |
| 1999.59996 | 50.426376 | 1.13805E-06 | 0.002275651 |
| 1999.63996 | 49.202785 | 1.11044E-06 | 0.002220477 |
| 1999.67996 | 55.380941 | 1.24987E-06 | 0.002499341 |
| 1999.71996 | 49.545933 | 1.11818E-06 | 0.002236052 |
| 1999.75996 | 39.708224 | 8.96159E-07 | 0.001792103 |
| 1999.79996 | 47.824382 | 1.07933E-06 | 0.002158443 |
| 1999.83996 | 56.999447 | 1.2864E-06  | 0.00257259  |
| 1999.87996 | 51.384707 | 1.15968E-06 | 0.002319223 |
| 1999.91996 | 45.608321 | 1.02932E-06 | 0.00205855  |
| 1999.95996 | 41.387151 | 9.3405E-07  | 0.001868063 |
| 1999.99996 | 44.904401 | 1.01343E-06 | 0.00202686  |
